# Supplementary material for: Identification of Novel Mutations in Colorectal Cancer Patients using Ampliseq Comprehensive Cancer Panel
Source: Preprints.org preprint supplement (doi:10.20944/preprints202104.0401.v1), 2021-04-15
Supplement: Supplementary file 1 [file supplementary]

Supplementary Table S2

| sn   | CHR | SNP             | Gene ID  | C   | A1       | MAF      | A1A1 | A1A2 |
|------|-----|-----------------|----------|-----|----------|----------|------|------|
| 665  | 2   | chr2:148672817  | ACVR2A   | T   | G        | 0.005556 | 0    | 1    |
| 2899 | 12  | chr12:43846296  | ADAMTS20 | T   | G        | 0.005556 | 0    | 1    |
| 1154 | 4   | chr4:87967279   | AFF1     | C   | A        | 0.005556 | 0    | 1    |
| 1155 | 4   | chr4:87967936   | AFF1     | T   | C        | 0.005556 | 0    | 1    |
| 1912 | 7   | chr7:91631234   | AKAP9    | C   | A        | 0.005556 | 0    | 1    |
| 1915 | 7   | chr7:91641671   | AKAP9    | TGC | CAA      | 0.005556 | 0    | 1    |
| 1919 | 7   | chr7:91670064   | AKAP9    | C   | T        | 0.005556 | 0    | 1    |
| 1921 | 7   | chr7:91672096   | AKAP9    | G   | T        | 0.005556 | 0    | 1    |
| 1923 | 7   | chr7:91699372   | AKAP9    | A   | -        | 0.005556 | 0    | 1    |
| 1927 | 7   | chr7:91709156   | AKAP9    | G   | T        | 0.005556 | 0    | 1    |
| 1929 | 7   | chr7:91712728   | AKAP9    | A   | C        | 0.005556 | 0    | 1    |
| 3951 | 19  | chr19:40741244  | AKT2     | A   | G        | 0.005556 | 0    | 1    |
| 486  | 1   | chr1:243727211  | AKT3     | -   | T        | 0.005556 | 0    | 1    |
| 520  | 2   | chr2:29498305   | ALK      | -   | A        | 0.005556 | 0    | 1    |
| 1299 | 5   | chr5:112164622  | APC      | A   | G        | 0.005556 | 0    | 1    |
| 1300 | 5   | chr5:112164623  | APC      | -   | T        | 0.005556 | 0    | 1    |
| 1303 | 5   | chr5:112173971  | APC      | TA  | GT       | 0.005556 | 0    | 1    |
| 1307 | 5   | chr5:112175208  | APC      | -   | A        | 0.005556 | 0    | 1    |
| 1316 | 5   | chr5:112175611  | APC      | -   | ACCACCTC | 0.005556 | 0    | 1    |
| 4226 | 23  | chrX:66943601   | AR       | -   | A        | 0.088    | 4    | 0    |
| 62   | 1   | chr1:27092820   | ARID1A   | -   | A        | 0.005556 | 0    | 1    |
| 63   | 1   | chr1:27092822   | ARID1A   | T   | A        | 0.005556 | 0    | 1    |
| 64   | 1   | chr1:27097699   | ARID1A   | A   | T        | 0.02222  | 1    | 2    |
| 65   | 1   | chr1:27099010   | ARID1A   | -   | G        | 0.01111  | 1    | 0    |
| 70   | 1   | chr1:27106343   | ARID1A   | T   | C        | 0.005556 | 0    | 1    |
| 2915 | 12  | chr12:46285667  | ARID2    | C   | A        | 0.005556 | 0    | 1    |
| 312  | 1   | chr1:150808978  | ARNT     | A   | G        | 0.005556 | 0    | 1    |
| 2814 | 11  | chr11:108117897 | ATM      | TTA | ATT      | 0.005556 | 0    | 1    |
| 2833 | 11  | chr11:108175596 | ATM      | G   | T        | 0.005556 | 0    | 1    |
| 2835 | 11  | chr11:108201010 | ATM      | C   | T        | 0.005556 | 0    | 1    |
| 979  | 3   | chr3:142176618  | ATR      | -   | T        | 0.005556 | 0    | 1    |
| 980  | 3   | chr3:142176649  | ATR      | A   | C        | 0.005556 | 0    | 1    |
| 982  | 3   | chr3:142186845  | ATR      | -   | T        | 0.005556 | 0    | 1    |
| 991  | 3   | chr3:142269112  | ATR      | G   | C        | 0.005556 | 0    | 1    |
| 994  | 3   | chr3:142272647  | ATR      | A   | T        | 0.01111  | 0    | 2    |
| 995  | 3   | chr3:142274652  | ATR      | A   | C        | 0.005556 | 0    | 1    |
| 4236 | 23  | chrX:76849165   | ATRX     | T   | C        | 0.008    | 0    | 1    |
| 4046 | 20  | chr20:54959349  | AURKA    | T   | -        | 0.005556 | 0    | 1    |
| 3586 | 17  | chr17:8109871   | AURKB    | C   | T        | 0.005556 | 0    | 1    |
| 3999 | 19  | chr19:57744792  | AURKC    | T   | C        | 0.005556 | 0    | 1    |
| 1601 | 6   | chr6:69349192   | BAI3     | A   | G        | 0.005556 | 0    | 1    |
| 1615 | 6   | chr6:70071243   | BAI3     | G   | A        | 0.005556 | 0    | 1    |
| 111  | 1   | chr1:85733370   | BCL10    | C   | A        | 0.005556 | 0    | 1    |
| 113  | 1   | chr1:85736596   | BCL10    | T   | G        | 0.005556 | 0    | 1    |
| 558  | 2   | chr2:60773062   | BCL11A   | G   | A        | 0.005556 | 0    | 1    |

|      |    |                 |         |     |          |            |   |
|------|----|-----------------|---------|-----|----------|------------|---|
| 1030 | 3  | chr3:187447019  | BCL6    | A   | G        | 0.005556 0 | 1 |
| 293  | 1  | chr1:147090697  | BCL9    | T   | C        | 0.005556 0 | 1 |
| 298  | 1  | chr1:147094034  | BCL9    | T   | A        | 0.005556 0 | 1 |
| 2793 | 11 | chr11:102195293 | BIRC3   | C   | A        | 0.005556 0 | 1 |
| 2795 | 11 | chr11:102195716 | BIRC3   | T   | G        | 0.005556 0 | 1 |
| 2796 | 11 | chr11:102201890 | BIRC3   | C   | T        | 0.005556 0 | 1 |
| 2797 | 11 | chr11:102207645 | BIRC3   | A   | C        | 0.01111 0  | 2 |
| 2798 | 11 | chr11:102207653 | BIRC3   | C   | A        | 0.005556 0 | 1 |
| 3719 | 17 | chr17:76210389  | BIRC5   | A   | G        | 0.005556 0 | 1 |
| 3722 | 17 | chr17:76219645  | BIRC5   | T   | C        | 0.02778 0  | 5 |
| 3291 | 15 | chr15:91304145  | BLM     | T   | A        | 0.01111 0  | 2 |
| 3299 | 15 | chr15:91347493  | BLM     | A   | C        | 0.005556 0 | 1 |
| 2657 | 10 | chr10:97975168  | BLNK    | -   | TA       | 0.03333 0  | 6 |
| 3691 | 17 | chr17:59760648  | BRIP1   | C   | T        | 0.005556 0 | 1 |
| 3697 | 17 | chr17:59858190  | BRIP1   | T   | G        | 0.005556 0 | 1 |
| 3698 | 17 | chr17:59861596  | BRIP1   | A   | T        | 0.005556 0 | 1 |
| 1855 | 7  | chr7:2968269    | CARD11  | C   | T        | 0.005556 0 | 1 |
| 3230 | 15 | chr15:40913884  | CASC5   | T   | G        | 0.005556 0 | 1 |
| 3244 | 15 | chr15:40949531  | CASC5   | -   | TTTT     | 0.005556 0 | 1 |
| 2849 | 11 | chr11:119145464 | CBL     | -   | TT       | 0.005556 0 | 1 |
| 391  | 1  | chr1:193110968  | CDC73   | G   | A        | 0.005556 0 | 1 |
| 393  | 1  | chr1:193111251  | CDC73   | A   | G        | 0.005556 0 | 1 |
| 3462 | 16 | chr16:68844081  | CDH1    | T   | C        | 0.005556 0 | 1 |
| 3448 | 16 | chr16:65026991  | CDH11   | G   | T        | 0.005556 0 | 1 |
| 3801 | 18 | chr18:25589869  | CDH2    | A   | G        | 0.005556 0 | 1 |
| 3804 | 18 | chr18:25593716  | CDH2    | A   | C        | 0.005556 0 | 1 |
| 3857 | 18 | chr18:59221876  | CDH20   | A   | G        | 0.02778 0  | 5 |
| 3617 | 17 | chr17:37627782  | CDK12   | G   | T        | 0.005556 0 | 1 |
| 2960 | 12 | chr12:58143112  | CDK4    | -   | AGG      | 0.005556 0 | 1 |
| 2403 | 9  | chr9:21994158   | CDKN2A  | C   | T        | 0.005556 0 | 1 |
| 3961 | 19 | chr19:42791062  | CIC     | T   | C        | 0.005556 0 | 1 |
| 3965 | 19 | chr19:42798455  | CIC     | G   | A        | 0.005556 0 | 1 |
| 3689 | 17 | chr17:48277061  | COL1A1  | -   | CCCCAGGC | 0.01667 1  | 1 |
| 763  | 3  | chr3:3194271    | CRBN    | C   | A        | 0.005556 0 | 1 |
| 766  | 3  | chr3:3197988    | CRBN    | G   | C        | 0.005556 0 | 1 |
| 3360 | 16 | chr16:3843610   | CREBBP  | G   | T        | 0.005556 0 | 1 |
| 2291 | 8  | chr8:113254080  | CSMD3   | -   | CACACACG | 0.01111 0  | 2 |
| 2296 | 8  | chr8:113301795  | CSMD3   | TTA | ATT      | 0.005556 0 | 1 |
| 2302 | 8  | chr8:113323397  | CSMD3   | G   | T        | 0.005556 0 | 1 |
| 2311 | 8  | chr8:113516216  | CSMD3   | G   | A        | 0.01667 0  | 3 |
| 2313 | 8  | chr8:113568949  | CSMD3   | G   | T        | 0.005556 0 | 1 |
| 1340 | 5  | chr5:138266523  | CTNNA1  | G   | A        | 0.005556 0 | 1 |
| 1343 | 5  | chr5:138269717  | CTNNA1  | -   | AGA      | 0.005556 0 | 1 |
| 853  | 3  | chr3:41267196   | CTNNB1  | A   | C        | 0.005556 0 | 1 |
| 2651 | 10 | chr10:96541627  | CYP2C19 | G   | A        | 0.005556 0 | 1 |
| 4176 | 22 | chr22:42524893  | CYP2D6  | T   | C        | 0.005556 0 | 1 |
| 3830 | 18 | chr18:50451642  | DCC     | G   | T        | 0.005556 0 | 1 |

|      |    |                 |        |    |        |            |    |
|------|----|-----------------|--------|----|--------|------------|----|
| 3831 | 18 | chr18:50451662  | DCC    | C  | G      | 0.005556 0 | 1  |
| 3844 | 18 | chr18:50942526  | DCC    | T  | G      | 0.005556 0 | 1  |
| 3845 | 18 | chr18:50976845  | DCC    | C  | A      | 0.005556 0 | 1  |
| 341  | 1  | chr1:162737153  | DDR2   | T  | A      | 0.01111 0  | 2  |
| 343  | 1  | chr1:162740326  | DDR2   | CG | GT     | 0.01111 0  | 2  |
| 349  | 1  | chr1:162748385  | DDR2   | T  | G      | 0.005556 0 | 1  |
| 3153 | 14 | chr14:95569893  | DICER1 | A  | G      | 0.005556 0 | 1  |
| 499  | 2  | chr2:25457148   | DNMT3A | G  | T      | 0.005556 0 | 1  |
| 506  | 2  | chr2:25523013   | DNMT3A | A  | G      | 0.005556 0 | 1  |
| 119  | 1  | chr1:97564040   | DPYD   | G  | T      | 0.005556 0 | 1  |
| 128  | 1  | chr1:98144767   | DPYD   | T  | A      | 0.005556 0 | 1  |
| 133  | 1  | chr1:98206046   | DPYD   | C  | A      | 0.005556 0 | 1  |
| 135  | 1  | chr1:98386487   | DPYD   | A  | C      | 0.005556 0 | 1  |
| 1548 | 6  | chr6:56341107   | DST    | A  | T      | 0.08889 0  | 16 |
| 1549 | 6  | chr6:56347533   | DST    | C  | A      | 0.005556 0 | 1  |
| 1550 | 6  | chr6:56350158   | DST    | C  | A      | 0.005556 0 | 1  |
| 1562 | 6  | chr6:56417148   | DST    | G  | T      | 0.005556 0 | 1  |
| 1566 | 6  | chr6:56417448   | DST    | C  | A      | 0.005556 0 | 1  |
| 1588 | 6  | chr6:56485091   | DST    | -  | AAA    | 0.01111 1  | 0  |
| 1590 | 6  | chr6:56485266   | DST    | C  | G      | 0.005556 0 | 1  |
| 1593 | 6  | chr6:56489467   | DST    | -  | TTACTC | 0.005556 0 | 1  |
| 4153 | 22 | chr22:41542838  | EP300  | -  | T      | 0.03333 3  | 0  |
| 4157 | 22 | chr22:41550944  | EP300  | A  | T      | 0.005556 0 | 1  |
| 2992 | 12 | chr12:132466141 | EP400  | A  | G      | 0.005556 0 | 1  |
| 2996 | 12 | chr12:132490800 | EP400  | A  | G      | 0.005556 0 | 1  |
| 2997 | 12 | chr12:132497625 | EP400  | T  | C      | 0.005556 0 | 1  |
| 3004 | 12 | chr12:132529321 | EP400  | C  | A      | 0.005556 0 | 1  |
| 3008 | 12 | chr12:132535176 | EP400  | G  | A      | 0.005556 0 | 1  |
| 3014 | 12 | chr12:132562069 | EP400  | C  | A      | 0.01111 1  | 0  |
| 942  | 3  | chr3:89448462   | EPHA3  | C  | T      | 0.005556 0 | 1  |
| 944  | 3  | chr3:89462276   | EPHA3  | C  | T      | 0.005556 0 | 1  |
| 945  | 3  | chr3:89462294   | EPHA3  | C  | A      | 0.005556 0 | 1  |
| 1626 | 6  | chr6:93968004   | EPHA7  | C  | T      | 0.05556 3  | 4  |
| 1627 | 6  | chr6:93973530   | EPHA7  | G  | T      | 0.005556 0 | 1  |
| 1634 | 6  | chr6:94128960   | EPHA7  | C  | T      | 0.005556 0 | 1  |
| 964  | 3  | chr3:134885838  | EPHB1  | T  | C      | 0.005556 0 | 1  |
| 3627 | 17 | chr17:37868327  | ERBB2  | A  | G      | 0.005556 0 | 1  |
| 3629 | 17 | chr17:37868741  | ERBB2  | C  | G      | 0.005556 0 | 1  |
| 3636 | 17 | chr17:37883680  | ERBB2  | T  | C      | 0.005556 0 | 1  |
| 2948 | 12 | chr12:56479046  | ERBB3  | T  | C      | 0.005556 0 | 1  |
| 700  | 2  | chr2:212248634  | ERBB4  | T  | G      | 0.005556 0 | 1  |
| 704  | 2  | chr2:212495163  | ERBB4  | T  | G      | 0.005556 0 | 1  |
| 709  | 2  | chr2:212989451  | ERBB4  | T  | G      | 0.005556 0 | 1  |
| 4068 | 21 | chr21:39817470  | ERG    | C  | T      | 0.01111 1  | 0  |
| 1878 | 7  | chr7:13950941   | ETV1   | T  | G      | 0.005556 0 | 1  |
| 3645 | 17 | chr17:41610590  | ETV4   | G  | C      | 0.005556 0 | 1  |
| 2329 | 8  | chr8:118825146  | EXT1   | A  | T      | 0.005556 0 | 1  |

|      |    |                 |          |          |        |            |    |
|------|----|-----------------|----------|----------|--------|------------|----|
| 2333 | 8  | chr8:119122431  | EXT1     | A        | G      | 0.005556 0 | 1  |
| 2746 | 11 | chr11:44228576  | EXT2     | -        | A      | 0.005556 0 | 1  |
| 2088 | 7  | chr7:148523504  | EZH2     | A        | T      | 0.01667 0  | 3  |
| 4218 | 23 | chrX:63411640   | FAM123B  | ATAGAACT | -      | 0.008 0    | 1  |
| 3505 | 16 | chr16:89857743  | FANCA    | C        | G      | 0.005556 0 | 1  |
| 3516 | 16 | chr16:89877320  | FANCA    | A        | C      | 0.005556 0 | 1  |
| 780  | 3  | chr3:10088295   | FANCD2   | G        | A      | 0.005556 0 | 1  |
| 791  | 3  | chr3:10132031   | FANCD2   | -        | A      | 0.01111 0  | 2  |
| 3895 | 19 | chr19:8146019   | FBN3     | G        | T      | 0.01111 1  | 0  |
| 1196 | 4  | chr4:153244077  | FBXW7    | A        | C      | 0.005556 0 | 1  |
| 2165 | 8  | chr8:38272357   | FGFR1    | A        | T      | 0.04444 0  | 8  |
| 2688 | 10 | chr10:123246886 | FGFR2    | C        | T      | 0.005556 0 | 1  |
| 1065 | 4  | chr4:1803326    | FGFR3    | -        | C      | 0.005556 0 | 1  |
| 1073 | 4  | chr4:1807545    | FGFR3    | -        | C      | 0.01111 0  | 2  |
| 1377 | 5  | chr5:176520463  | FGFR4    | A        | G      | 0.005556 0 | 1  |
| 3021 | 13 | chr13:28597449  | FLT3     | -        | CT     | 0.02222 2  | 0  |
| 1403 | 5  | chr5:180035995  | FLT4     | G        | C      | 0.005556 0 | 1  |
| 712  | 2  | chr2:216232553  | FN1      | G        | A      | 0.005556 0 | 1  |
| 717  | 2  | chr2:216237084  | FN1      | C        | G      | 0.005556 0 | 1  |
| 737  | 2  | chr2:216272993  | FN1      | A        | C      | 0.005556 0 | 1  |
| 3051 | 13 | chr13:41134840  | FOXO1    | C        | A      | 0.005556 0 | 1  |
| 1642 | 6  | chr6:108985258  | FOXO3    | G        | A      | 0.005556 0 | 1  |
| 936  | 3  | chr3:71179709   | FOXP1    | C        | -      | 0.005556 0 | 1  |
| 1471 | 6  | chr6:41559050   | FOXP4    | T        | C      | 0.005556 0 | 1  |
| 3885 | 19 | chr19:3531825   | FZR1     | G        | C      | 0.005556 0 | 1  |
| 955  | 3  | chr3:128202760  | GATA2    | C        | G      | 0.03889 1  | 5  |
| 4052 | 20 | chr20:57428437  | GNAS     | G        | C      | 0.1222 0   | 22 |
| 2162 | 8  | chr8:37691418   | GPR124   | A        | C      | 0.005556 0 | 1  |
| 489  | 2  | chr2:11751005   | GREB1    | T        | G      | 0.01111 1  | 0  |
| 2803 | 11 | chr11:106579288 | GUCY1A2  | A        | G      | 0.005556 0 | 1  |
| 2189 | 8  | chr8:42868456   | HOOK3    | -        | TTTTTT | 0.005556 0 | 1  |
| 3167 | 14 | chr14:102548088 | HSP90AA1 | G        | T      | 0.005556 0 | 1  |
| 3170 | 14 | chr14:102548797 | HSP90AA1 | C        | G      | 0.005556 0 | 1  |
| 3286 | 15 | chr15:90628243  | IDH2     | A        | C      | 0.005556 0 | 1  |
| 3305 | 15 | chr15:99250742  | IGF1R    | C        | A      | 0.005556 0 | 1  |
| 3313 | 15 | chr15:99460151  | IGF1R    | T        | G      | 0.005556 0 | 1  |
| 1809 | 6  | chr6:160412166  | IGF2R    | T        | A      | 0.01111 0  | 2  |
| 1819 | 6  | chr6:160491086  | IGF2R    | G        | A      | 0.005556 0 | 1  |
| 2184 | 8  | chr8:42175297   | IKBKB    | C        | T      | 0.005556 0 | 1  |
| 426  | 1  | chr1:206647652  | IKBKE    | T        | A      | 0.005556 0 | 1  |
| 1266 | 5  | chr5:55237092   | IL6ST    | C        | A      | 0.005556 0 | 1  |
| 1267 | 5  | chr5:55237596   | IL6ST    | A        | C      | 0.005556 0 | 1  |
| 1269 | 5  | chr5:55247262   | IL6ST    | -        | GAAA   | 0.005556 0 | 1  |
| 1273 | 5  | chr5:55256341   | IL6ST    | T        | C      | 0.005556 0 | 1  |
| 1277 | 5  | chr5:55264283   | IL6ST    | G        | T      | 0.005556 0 | 1  |
| 1422 | 6  | chr6:397155     | IRF4     | T        | C      | 0.005556 0 | 1  |
| 3073 | 13 | chr13:110434840 | IRS2     | T        | C      | 0.005556 0 | 1  |

|      |    |                |        |     |    |            |    |
|------|----|----------------|--------|-----|----|------------|----|
| 279  | 1  | chr1:145528319 | ITGA10 | T   | G  | 0.005556 0 | 1  |
| 280  | 1  | chr1:145528348 | ITGA10 | A   | G  | 0.005556 0 | 1  |
| 282  | 1  | chr1:145530939 | ITGA10 | T   | C  | 0.02222 0  | 4  |
| 286  | 1  | chr1:145533894 | ITGA10 | -   | C  | 0.01667 0  | 3  |
| 838  | 3  | chr3:37567515  | ITGA9  | C   | A  | 0.005556 0 | 1  |
| 848  | 3  | chr3:37791907  | ITGA9  | A   | C  | 0.005556 0 | 1  |
| 4083 | 21 | chr21:46327067 | ITGB2  | A   | -  | 0.02222 2  | 0  |
| 3651 | 17 | chr17:45360865 | ITGB3  | A   | C  | 0.005556 0 | 1  |
| 3652 | 17 | chr17:45361773 | ITGB3  | T   | G  | 0.005556 0 | 1  |
| 3662 | 17 | chr17:45377857 | ITGB3  | C   | T  | 0.005556 0 | 1  |
| 3663 | 17 | chr17:45377881 | ITGB3  | A   | C  | 0.005556 0 | 1  |
| 2368 | 9  | chr9:5081778   | JAK2   | TA  | CT | 0.01111 1  | 0  |
| 2370 | 9  | chr9:5090443   | JAK2   | G   | A  | 0.005556 0 | 1  |
| 2171 | 8  | chr8:41791041  | KAT6A  | A   | -  | 0.01111 1  | 0  |
| 2615 | 10 | chr10:76735416 | KAT6B  | -   | T  | 0.06667 1  | 10 |
| 2617 | 10 | chr10:76736004 | KAT6B  | C   | T  | 0.005556 0 | 1  |
| 2618 | 10 | chr10:76744954 | KAT6B  | -   | A  | 0.005556 0 | 1  |
| 2619 | 10 | chr10:76744958 | KAT6B  | T   | A  | 0.005556 0 | 1  |
| 2620 | 10 | chr10:76744965 | KAT6B  | G   | A  | 0.01111 0  | 2  |
| 4214 | 23 | chrX:53245059  | KDM5C  | T   | C  | 0 0        | 0  |
| 4205 | 23 | chrX:44942869  | KDM6A  | C   | T  | 0.008 0    | 1  |
| 1122 | 4  | chr4:55953747  | KDR    | -   | CG | 0.03333 3  | 0  |
| 1126 | 4  | chr4:55970908  | KDR    | G   | T  | 0.005556 0 | 1  |
| 1130 | 4  | chr4:55980293  | KDR    | A   | C  | 0.005556 0 | 1  |
| 1131 | 4  | chr4:55981509  | KDR    | T   | -  | 0.005556 0 | 1  |
| 3901 | 19 | chr19:10600522 | KEAP1  | A   | G  | 0.005556 0 | 1  |
| 2561 | 10 | chr10:3824270  | KLF6   | C   | T  | 0.005556 0 | 1  |
| 2879 | 12 | chr12:25398279 | KRAS   | CGC | -  | 0.005556 0 | 1  |
| 1249 | 5  | chr5:38481879  | LIFR   | G   | T  | 0.005556 0 | 1  |
| 1250 | 5  | chr5:38482324  | LIFR   | T   | G  | 0.005556 0 | 1  |
| 1252 | 5  | chr5:38486091  | LIFR   | T   | A  | 0.005556 0 | 1  |
| 1256 | 5  | chr5:38499715  | LIFR   | A   | G  | 0.005556 0 | 1  |
| 1258 | 5  | chr5:38502822  | LIFR   | C   | G  | 0.005556 0 | 1  |
| 1137 | 4  | chr4:62599099  | LPHN3  | G   | A  | 0.005556 0 | 1  |
| 1150 | 4  | chr4:62897317  | LPHN3  | A   | C  | 0.005556 0 | 1  |
| 597  | 2  | chr2:141079482 | LRP1B  | G   | T  | 0.005556 0 | 1  |
| 606  | 2  | chr2:141202026 | LRP1B  | CA  | AT | 0.07778 7  | 0  |
| 607  | 2  | chr2:141214069 | LRP1B  | G   | C  | 0.005556 0 | 1  |
| 609  | 2  | chr2:141232924 | LRP1B  | C   | T  | 0.005556 0 | 1  |
| 624  | 2  | chr2:141299350 | LRP1B  | T   | C  | 0.005556 0 | 1  |
| 633  | 2  | chr2:141598592 | LRP1B  | C   | A  | 0.005556 0 | 1  |
| 637  | 2  | chr2:141607906 | LRP1B  | T   | A  | 0.005556 0 | 1  |
| 640  | 2  | chr2:141680645 | LRP1B  | C   | A  | 0.005556 0 | 1  |
| 652  | 2  | chr2:141819743 | LRP1B  | T   | C  | 0.005556 0 | 1  |
| 655  | 2  | chr2:141986696 | LRP1B  | A   | G  | 0.005556 0 | 1  |
| 656  | 2  | chr2:142004935 | LRP1B  | C   | A  | 0.005556 0 | 1  |
| 661  | 2  | chr2:142888193 | LRP1B  | TA  | GG | 0.005556 0 | 1  |

|      |    |                 |        |     |        |            |    |
|------|----|-----------------|--------|-----|--------|------------|----|
| 881  | 3  | chr3:46501310   | LTF    | A   | C      | 0.005556 0 | 1  |
| 920  | 3  | chr3:65376926   | MAGI1  | T   | C      | 0.005556 0 | 1  |
| 2785 | 11 | chr11:95724845  | MAML2  | C   | T      | 0.005556 0 | 1  |
| 2790 | 11 | chr11:95826226  | MAML2  | A   | G      | 0.005556 0 | 1  |
| 2791 | 11 | chr11:95826390  | MAML2  | A   | G      | 0.005556 0 | 1  |
| 3270 | 15 | chr15:66782073  | MAP2K1 | T   | C      | 0.005556 0 | 1  |
| 441  | 1  | chr1:220808683  | MARK1  | GC  | TT     | 0.01111 0  | 2  |
| 3976 | 19 | chr19:45805895  | MARK4  | A   | T      | 0.005556 0 | 1  |
| 3807 | 18 | chr18:47793930  | MBD1   | G   | A      | 0.03333 0  | 6  |
| 3813 | 18 | chr18:47801260  | MBD1   | C   | A      | 0.01111 1  | 0  |
| 300  | 1  | chr1:150550722  | MCL1   | G   | A      | 0.005556 0 | 1  |
| 2755 | 11 | chr11:64572073  | MEN1   | A   | G      | 0.005556 0 | 1  |
| 2021 | 7  | chr7:116339867  | MET    | G   | T      | 0.005556 0 | 1  |
| 2025 | 7  | chr7:116397717  | MET    | G   | C      | 0.06111 0  | 11 |
| 929  | 3  | chr3:69985829   | MITF   | C   | T      | 0.005556 0 | 1  |
| 932  | 3  | chr3:70000910   | MITF   | G   | T      | 0.005556 0 | 1  |
| 833  | 3  | chr3:37090047   | MLH1   | A   | T      | 0.005556 0 | 1  |
| 2844 | 11 | chr11:118376178 | MLL    | T   | G      | 0.005556 0 | 1  |
| 2846 | 11 | chr11:118390491 | MLL    | A   | G      | 0.005556 0 | 1  |
| 2931 | 12 | chr12:49433170  | MLL2   | C   | -      | 0.01111 1  | 0  |
| 2096 | 7  | chr7:151859655  | MLL3   | A   | G      | 0.005556 0 | 1  |
| 2107 | 7  | chr7:151879244  | MLL3   | -   | T      | 0.04444 4  | 0  |
| 2112 | 7  | chr7:151902163  | MLL3   | T   | A      | 0.01111 1  | 0  |
| 2113 | 7  | chr7:151902164  | MLL3   | T   | A      | 0.005556 0 | 1  |
| 2114 | 7  | chr7:151902167  | MLL3   | -   | TT     | 0.005556 0 | 1  |
| 2117 | 7  | chr7:151947941  | MLL3   | T   | C      | 0.005556 0 | 1  |
| 2127 | 7  | chr7:151971024  | MLL3   | A   | G      | 0.005556 0 | 1  |
| 2567 | 10 | chr10:21901248  | MLLT10 | T   | -      | 0.01667 0  | 3  |
| 2568 | 10 | chr10:21901253  | MLLT10 | T   | G      | 0.01667 0  | 3  |
| 2572 | 10 | chr10:22022026  | MLLT10 | T   | A      | 0.005556 0 | 1  |
| 76   | 1  | chr1:43803502   | MPL    | T   | C      | 0.005556 0 | 1  |
| 82   | 1  | chr1:43818486   | MPL    | T   | C      | 0.005556 0 | 1  |
| 2781 | 11 | chr11:94224026  | MRE11A | G   | T      | 0.005556 0 | 1  |
| 538  | 2  | chr2:47639586   | MSH2   | T   | A      | 0.005556 0 | 1  |
| 540  | 2  | chr2:47641570   | MSH2   | G   | A      | 0.005556 0 | 1  |
| 542  | 2  | chr2:47643502   | MSH2   | C   | A      | 0.02222 1  | 2  |
| 548  | 2  | chr2:47705460   | MSH2   | -   | ACTTCT | 0.005556 0 | 1  |
| 35   | 1  | chr1:11167502   | MTOR   | C   | A      | 0.005556 0 | 1  |
| 457  | 1  | chr1:236966821  | MTR    | TT  | GG     | 0.02778 0  | 5  |
| 466  | 1  | chr1:237016242  | MTR    | A   | C      | 0.005556 0 | 1  |
| 469  | 1  | chr1:237038012  | MTR    | T   | A      | 0.005556 0 | 1  |
| 475  | 1  | chr1:237058719  | MTR    | G   | A      | 0.005556 0 | 1  |
| 322  | 1  | chr1:155160052  | MUC1   | GAC | ACT    | 0.01111 1  | 0  |
| 325  | 1  | chr1:155160768  | MUC1   | G   | A      | 0.005556 0 | 1  |
| 92   | 1  | chr1:45799181   | MUTYH  | T   | G      | 0.01111 1  | 0  |
| 2338 | 8  | chr8:128753001  | MYC    | TGA | -      | 0.01111 1  | 0  |
| 2340 | 8  | chr8:128753260  | MYC    | T   | G      | 0.005556 0 | 1  |

|      |    |                 |         |      |    |            |   |
|------|----|-----------------|---------|------|----|------------|---|
| 75   | 1  | chr1:40363605   | MYCL1   | A    | C  | 0.005556 0 | 1 |
| 490  | 2  | chr2:16086048   | MYCN    | A    | G  | 0.005556 0 | 1 |
| 3376 | 16 | chr16:15808865  | MYH11   | G    | A  | 0.005556 0 | 1 |
| 3391 | 16 | chr16:15826573  | MYH11   | A    | G  | 0.005556 0 | 1 |
| 4122 | 22 | chr22:36690119  | MYH9    | CC   | GT | 0.005556 0 | 1 |
| 2225 | 8  | chr8:71041018   | NCOA2   | A    | C  | 0.005556 0 | 1 |
| 2226 | 8  | chr8:71041202   | NCOA2   | C    | T  | 0.005556 0 | 1 |
| 2231 | 8  | chr8:71075661   | NCOA2   | G    | A  | 0.005556 0 | 1 |
| 2232 | 8  | chr8:71075779   | NCOA2   | C    | G  | 0.01111 1  | 0 |
| 2234 | 8  | chr8:71128917   | NCOA2   | G    | A  | 0.005556 0 | 1 |
| 2593 | 10 | chr10:51584910  | NCOA4   | A    | G  | 0.01111 0  | 2 |
| 2595 | 10 | chr10:51586458  | NCOA4   | ATAT | -  | 0.005556 0 | 1 |
| 3599 | 17 | chr17:29527684  | NF1     | A    | G  | 0.005556 0 | 1 |
| 3604 | 17 | chr17:29563074  | NF1     | TTG  | -  | 0.01111 0  | 2 |
| 3615 | 17 | chr17:29684016  | NF1     | G    | T  | 0.005556 0 | 1 |
| 670  | 2  | chr2:178096253  | NFE2L2  | G    | A  | 0.005556 0 | 1 |
| 1176 | 4  | chr4:103533242  | NFKB1   | G    | T  | 0.005556 0 | 1 |
| 1177 | 4  | chr4:103533291  | NFKB1   | A    | C  | 0.005556 0 | 1 |
| 1178 | 4  | chr4:103533656  | NFKB1   | A    | C  | 0.005556 0 | 1 |
| 1180 | 4  | chr4:103537741  | NFKB1   | T    | G  | 0.005556 0 | 1 |
| 2663 | 10 | chr10:104156192 | NFKB2   | A    | C  | 0.005556 0 | 1 |
| 3091 | 14 | chr14:51221316  | NIN     | G    | C  | 0.01111 1  | 0 |
| 3097 | 14 | chr14:51225320  | NIN     | C    | T  | 0.005556 0 | 1 |
| 3546 | 17 | chr17:5487204   | NLRP1   | A    | T  | 0.005556 0 | 1 |
| 147  | 1  | chr1:120477935  | NOTCH2  | A    | G  | 0.005556 0 | 1 |
| 159  | 1  | chr1:120539655  | NOTCH2  | C    | G  | 0.005556 0 | 1 |
| 1438 | 6  | chr6:32164107   | NOTCH4  | A    | G  | 0.005556 0 | 1 |
| 1442 | 6  | chr6:32166734   | NOTCH4  | A    | G  | 0.005556 0 | 1 |
| 1384 | 5  | chr5:176637204  | NSD1    | C    | T  | 0.01111 0  | 2 |
| 328  | 1  | chr1:156811985  | NTRK1   | C    | G  | 0.005556 0 | 1 |
| 329  | 1  | chr1:156841496  | NTRK1   | A    | G  | 0.005556 0 | 1 |
| 3280 | 15 | chr15:88669573  | NTRK3   | A    | G  | 0.005556 0 | 1 |
| 2506 | 9  | chr9:134090676  | NUP214  | G    | A  | 0.01111 1  | 0 |
| 2714 | 11 | chr11:3794852   | NUP98   | A    | T  | 0.005556 0 | 1 |
| 4245 | 23 | chrX:110463549  | PAK3    | T    | G  | 0 0        | 0 |
| 2430 | 9  | chr9:37006542   | PAX5    | A    | C  | 0.005556 0 | 1 |
| 57   | 1  | chr1:19018422   | PAX7    | T    | C  | 0.005556 0 | 1 |
| 901  | 3  | chr3:52610602   | PBRM1   | C    | A  | 0.005556 0 | 1 |
| 902  | 3  | chr3:52610619   | PBRM1   | G    | A  | 0.005556 0 | 1 |
| 161  | 1  | chr1:144852315  | PDE4DIP | T    | C  | 0.04444 1  | 6 |
| 181  | 1  | chr1:144859929  | PDE4DIP | T    | C  | 0.02778 0  | 5 |
| 182  | 1  | chr1:144863360  | PDE4DIP | C    | T  | 0.02222 0  | 4 |
| 183  | 1  | chr1:144863366  | PDE4DIP | A    | G  | 0.005556 0 | 1 |
| 184  | 1  | chr1:144863384  | PDE4DIP | A    | C  | 0.005556 0 | 1 |
| 185  | 1  | chr1:144863388  | PDE4DIP | TT   | GA | 0.005556 0 | 1 |
| 192  | 1  | chr1:144866660  | PDE4DIP | T    | G  | 0.005556 0 | 1 |
| 194  | 1  | chr1:144866673  | PDE4DIP | A    | G  | 0.01111 0  | 2 |

|      |    |                |         |       |    |            |    |
|------|----|----------------|---------|-------|----|------------|----|
| 208  | 1  | chr1:144879054 | PDE4DIP | C     | T  | 0.02222 0  | 4  |
| 209  | 1  | chr1:144879086 | PDE4DIP | -     | T  | 0.005556 0 | 1  |
| 216  | 1  | chr1:144881463 | PDE4DIP | T     | C  | 0.02778 0  | 5  |
| 217  | 1  | chr1:144881547 | PDE4DIP | A     | G  | 0.05 0     | 9  |
| 225  | 1  | chr1:144886092 | PDE4DIP | T     | C  | 0.3667 0   | 66 |
| 227  | 1  | chr1:144886267 | PDE4DIP | T     | G  | 0.02222 0  | 4  |
| 246  | 1  | chr1:144923712 | PDE4DIP | C     | T  | 0.005556 0 | 1  |
| 247  | 1  | chr1:144930571 | PDE4DIP | A     | C  | 0.4222 0   | 76 |
| 250  | 1  | chr1:144930977 | PDE4DIP | C     | A  | 0.01111 0  | 2  |
| 255  | 1  | chr1:144931423 | PDE4DIP | C     | T  | 0.005556 0 | 1  |
| 259  | 1  | chr1:144994617 | PDE4DIP | T     | C  | 0.01667 0  | 3  |
| 261  | 1  | chr1:144994670 | PDE4DIP | A     | C  | 0.03333 0  | 6  |
| 262  | 1  | chr1:144994694 | PDE4DIP | C     | T  | 0.005556 0 | 1  |
| 1095 | 4  | chr4:55129892  | PDGFRA  | C     | T  | 0.01111 1  | 0  |
| 1096 | 4  | chr4:55129894  | PDGFRA  | G     | A  | 0.02222 2  | 0  |
| 1360 | 5  | chr5:149499530 | PDGFRB  | T     | A  | 0.1111 0   | 20 |
| 1366 | 5  | chr5:149514424 | PDGFRB  | A     | C  | 0.005556 0 | 1  |
| 3571 | 17 | chr17:8045566  | PER1    | GC    | AA | 0.005556 0 | 1  |
| 418  | 1  | chr1:204438894 | PIK3C2B | G     | A  | 0.005556 0 | 1  |
| 1012 | 3  | chr3:178916986 | PIK3CA  | A     | C  | 0.005556 0 | 1  |
| 1014 | 3  | chr3:178922273 | PIK3CA  | AA    | CC | 0.005556 0 | 1  |
| 975  | 3  | chr3:138461524 | PIK3CB  | G     | A  | 0.005556 0 | 1  |
| 2019 | 7  | chr7:106545513 | PIK3CG  | G     | A  | 0.005556 0 | 1  |
| 1281 | 5  | chr5:67522726  | PIK3R1  | T     | G  | 0.005556 0 | 1  |
| 1286 | 5  | chr5:67590496  | PIK3R1  | T     | G  | 0.005556 0 | 1  |
| 1487 | 6  | chr6:51524653  | PKHD1   | T     | A  | 0.005556 0 | 1  |
| 1490 | 6  | chr6:51613058  | PKHD1   | T     | G  | 0.005556 0 | 1  |
| 1508 | 6  | chr6:51889459  | PKHD1   | A     | T  | 0.005556 0 | 1  |
| 1513 | 6  | chr6:51890498  | PKHD1   | A     | C  | 0.005556 0 | 1  |
| 1527 | 6  | chr6:51921815  | PKHD1   | GCCTT | -  | 0.02222 2  | 0  |
| 1528 | 6  | chr6:51923126  | PKHD1   | T     | C  | 0.005556 0 | 1  |
| 677  | 2  | chr2:190719333 | PMS1    | C     | A  | 0.005556 0 | 1  |
| 678  | 2  | chr2:190719788 | PMS1    | A     | G  | 0.005556 0 | 1  |
| 1866 | 7  | chr7:6027040   | PMS2    | C     | A  | 0.005556 0 | 1  |
| 1867 | 7  | chr7:6029511   | PMS2    | T     | A  | 0.01111 0  | 2  |
| 1868 | 7  | chr7:6035156   | PMS2    | G     | T  | 0.005556 0 | 1  |
| 2033 | 7  | chr7:124475481 | POT1    | G     | T  | 0.005556 0 | 1  |
| 3704 | 17 | chr17:66511530 | PRKAR1A | G     | C  | 0.01111 1  | 0  |
| 2190 | 8  | chr8:48686929  | PRKDC   | C     | T  | 0.005556 0 | 1  |
| 2199 | 8  | chr8:48736499  | PRKDC   | G     | C  | 0.005556 0 | 1  |
| 2205 | 8  | chr8:48776046  | PRKDC   | G     | A  | 0.005556 0 | 1  |
| 2212 | 8  | chr8:48825021  | PRKDC   | C     | G  | 0.005556 0 | 1  |
| 2213 | 8  | chr8:48828031  | PRKDC   | C     | A  | 0.005556 0 | 1  |
| 2453 | 9  | chr9:98212211  | PTCH1   | T     | G  | 0.005556 0 | 1  |
| 2467 | 9  | chr9:98241253  | PTCH1   | C     | T  | 0.005556 0 | 1  |
| 388  | 1  | chr1:186646996 | PTGS2   | A     | C  | 0.005556 0 | 1  |
| 389  | 1  | chr1:186647541 | PTGS2   | C     | A  | 0.005556 0 | 1  |



|      |    |                 |         |    |    |            |   |
|------|----|-----------------|---------|----|----|------------|---|
| 2971 | 12 | chr12:112910806 | PTPN11  | A  | -  | 0.005556 0 | 1 |
| 2382 | 9  | chr9:8460647    | PTPRD   | -  | A  | 0.01111 1  | 0 |
| 2390 | 9  | chr9:8485904    | PTPRD   | T  | A  | 0.005556 0 | 1 |
| 2391 | 9  | chr9:8485984    | PTPRD   | T  | C  | 0.005556 0 | 1 |
| 4030 | 20 | chr20:40743814  | PTPRT   | G  | T  | 0.01111 1  | 0 |
| 1330 | 5  | chr5:131924445  | RAD50   | A  | C  | 0.005556 0 | 1 |
| 804  | 3  | chr3:12626400   | RAF1    | T  | C  | 0.005556 0 | 1 |
| 805  | 3  | chr3:12626737   | RAF1    | A  | G  | 0.005556 0 | 1 |
| 808  | 3  | chr3:12641349   | RAF1    | GG | AA | 0.005556 0 | 1 |
| 2519 | 9  | chr9:135981338  | RALGDS  | T  | C  | 0.005556 0 | 1 |
| 3638 | 17 | chr17:38504723  | RARA    | C  | T  | 0.005556 0 | 1 |
| 2342 | 8  | chr8:145737307  | RECQL4  | A  | G  | 0.005556 0 | 1 |
| 563  | 2  | chr2:61147771   | REL     | -  | A  | 0.01111 0  | 2 |
| 564  | 2  | chr2:61147775   | REL     | G  | A  | 0.01111 0  | 2 |
| 362  | 1  | chr1:185056670  | RNF2    | G  | T  | 0.01111 0  | 2 |
| 363  | 1  | chr1:185067185  | RNF2    | -  | T  | 0.005556 0 | 1 |
| 3728 | 17 | chr17:78262057  | RNF213  | T  | A  | 0.005556 0 | 1 |
| 3730 | 17 | chr17:78264358  | RNF213  | G  | T  | 0.005556 0 | 1 |
| 3734 | 17 | chr17:78268717  | RNF213  | T  | A  | 0.005556 0 | 1 |
| 3754 | 17 | chr17:78319102  | RNF213  | T  | C  | 0.005556 0 | 1 |
| 3777 | 17 | chr17:78351613  | RNF213  | T  | A  | 0.01111 0  | 2 |
| 3782 | 17 | chr17:78357518  | RNF213  | C  | -  | 0.005556 0 | 1 |
| 1656 | 6  | chr6:117710658  | ROS1    | G  | T  | 0.005556 0 | 1 |
| 1838 | 6  | chr6:166952128  | RPS6KA2 | T  | C  | 0.005556 0 | 1 |
| 2246 | 8  | chr8:92972668   | RUNX1T1 | C  | G  | 0.01111 1  | 0 |
| 2248 | 8  | chr8:93026955   | RUNX1T1 | A  | G  | 0.005556 0 | 1 |
| 2249 | 8  | chr8:93029480   | RUNX1T1 | A  | C  | 0.005556 0 | 1 |
| 1209 | 5  | chr5:233504     | SDHA    | C  | T  | 0.01667 0  | 3 |
| 887  | 3  | chr3:47155487   | SETD2   | A  | G  | 0.005556 0 | 1 |
| 892  | 3  | chr3:47163994   | SETD2   | G  | A  | 0.005556 0 | 1 |
| 682  | 2  | chr2:198262720  | SF3B1   | G  | T  | 0.005556 0 | 1 |
| 1674 | 6  | chr6:134498787  | SGK1    | T  | C  | 0.005556 0 | 1 |
| 1675 | 6  | chr6:134528524  | SGK1    | A  | G  | 0.005556 0 | 1 |
| 3818 | 18 | chr18:48575204  | SMAD4   | T  | A  | 0.005556 0 | 1 |
| 3824 | 18 | chr18:48593440  | SMAD4   | C  | T  | 0.005556 0 | 1 |
| 3921 | 19 | chr19:11170500  | SMARCA4 | T  | C  | 0.005556 0 | 1 |
| 4101 | 22 | chr22:24145672  | SMARCB1 | C  | -  | 0.03333 3  | 0 |
| 4106 | 22 | chr22:24167632  | SMARCB1 | C  | T  | 0.03333 0  | 6 |
| 487  | 2  | chr2:5833816    | SOX11   | T  | -  | 0.01111 1  | 0 |
| 1021 | 3  | chr3:181430876  | SOX2    | C  | T  | 0.005556 0 | 1 |
| 4010 | 20 | chr20:36031361  | SRC     | T  | C  | 0.005556 0 | 1 |
| 4011 | 20 | chr20:36031767  | SRC     | G  | C  | 0.01111 0  | 2 |
| 746  | 2  | chr2:219544800  | STK36   | T  | C  | 0.005556 0 | 1 |
| 2675 | 10 | chr10:104357022 | SUFU    | T  | C  | 0.005556 0 | 1 |
| 2433 | 9  | chr9:93606313   | SYK     | A  | C  | 0.005556 0 | 1 |
| 1703 | 6  | chr6:152457915  | SYNE1   | T  | G  | 0.005556 0 | 1 |
| 1712 | 6  | chr6:152470784  | SYNE1   | T  | G  | 0.005556 0 | 1 |

|      |    |                 |        |      |      |            |   |
|------|----|-----------------|--------|------|------|------------|---|
| 1713 | 6  | chr6:152472812  | SYNE1  | C    | T    | 0.005556 0 | 1 |
| 1721 | 6  | chr6:152529254  | SYNE1  | A    | G    | 0.005556 0 | 1 |
| 1725 | 6  | chr6:152542688  | SYNE1  | C    | G    | 0.005556 0 | 1 |
| 1740 | 6  | chr6:152631545  | SYNE1  | A    | G    | 0.005556 0 | 1 |
| 1741 | 6  | chr6:152631970  | SYNE1  | A    | C    | 0.005556 0 | 1 |
| 1742 | 6  | chr6:152639288  | SYNE1  | A    | C    | 0.005556 0 | 1 |
| 1744 | 6  | chr6:152644654  | SYNE1  | A    | C    | 0.005556 0 | 1 |
| 1752 | 6  | chr6:152652197  | SYNE1  | C    | A    | 0.005556 0 | 1 |
| 1764 | 6  | chr6:152674791  | SYNE1  | C    | T    | 0.005556 0 | 1 |
| 1782 | 6  | chr6:152712677  | SYNE1  | A    | C    | 0.005556 0 | 1 |
| 1805 | 6  | chr6:152823897  | SYNE1  | T    | A    | 0.005556 0 | 1 |
| 4229 | 23 | chrX:70597573   | TAF1   | C    | G    | 0.008 0    | 1 |
| 4235 | 23 | chrX:70683793   | TAF1   | T    | C    | 0 0        | 0 |
| 2411 | 9  | chr9:32631748   | TAF1L  | A    | G    | 0.005556 0 | 1 |
| 4240 | 23 | chrX:79279609   | TBX22  | C    | G    | 0.008 0    | 1 |
| 3877 | 19 | chr19:1646325   | TCF3   | CGAG | -    | 0.01111 0  | 2 |
| 573  | 2  | chr2:85534779   | TCF7L1 | -    | GAGG | 0.005556 0 | 1 |
| 2680 | 10 | chr10:114710518 | TCF7L2 | T    | G    | 0.005556 0 | 1 |
| 2684 | 10 | chr10:114911539 | TCF7L2 | T    | C    | 0.005556 0 | 1 |
| 2599 | 10 | chr10:70332342  | TET1   | G    | A    | 0.005556 0 | 1 |
| 2609 | 10 | chr10:70406386  | TET1   | A    | C    | 0.01111 1  | 0 |
| 2614 | 10 | chr10:70451510  | TET1   | A    | T    | 0.005556 0 | 1 |
| 1187 | 4  | chr4:106158026  | TET2   | T    | A    | 0.005556 0 | 1 |
| 1191 | 4  | chr4:106193885  | TET2   | -    | T    | 0.005556 0 | 1 |
| 4213 | 23 | chrX:48896874   | TFE3   | T    | C    | 0.008 0    | 1 |
| 3203 | 15 | chr15:39884882  | THBS1  | T    | G    | 0.01111 0  | 2 |
| 3569 | 17 | chr17:7579634   | TP53   | -    | C    | 0.005556 0 | 1 |
| 370  | 1  | chr1:186301473  | TPR    | T    | A    | 0.005556 0 | 1 |
| 372  | 1  | chr1:186304551  | TPR    | G    | A    | 0.005556 0 | 1 |
| 374  | 1  | chr1:186315243  | TPR    | T    | -    | 0.01111 0  | 2 |
| 136  | 1  | chr1:114940315  | TRIM33 | A    | G    | 0.005556 0 | 1 |
| 141  | 1  | chr1:114976234  | TRIM33 | T    | C    | 0.005556 0 | 1 |
| 3132 | 14 | chr14:92454746  | TRIP11 | T    | -    | 0.005556 0 | 1 |
| 3135 | 14 | chr14:92461911  | TRIP11 | T    | A    | 0.01111 0  | 2 |
| 3141 | 14 | chr14:92471880  | TRIP11 | T    | C    | 0.005556 0 | 1 |
| 1971 | 7  | chr7:98543325   | TRRAP  | G    | A    | 0.005556 0 | 1 |
| 1973 | 7  | chr7:98552756   | TRRAP  | C    | A    | 0.005556 0 | 1 |
| 1974 | 7  | chr7:98552760   | TRRAP  | T    | C    | 0.005556 0 | 1 |
| 1975 | 7  | chr7:98552779   | TRRAP  | T    | C    | 0.005556 0 | 1 |
| 1982 | 7  | chr7:98579357   | TRRAP  | T    | C    | 0.005556 0 | 1 |
| 3336 | 16 | chr16:2129453   | TSC2   | T    | -    | 0.02222 2  | 0 |
| 3115 | 14 | chr14:81554286  | TSHR   | C    | T    | 0.005556 0 | 1 |
| 3116 | 14 | chr14:81554303  | TSHR   | G    | T    | 0.005556 0 | 1 |
| 3121 | 14 | chr14:81606071  | TSHR   | A    | G    | 0.005556 0 | 1 |
| 2255 | 8  | chr8:103284936  | UBR5   | T    | C    | 0.005556 0 | 1 |
| 2257 | 8  | chr8:103289351  | UBR5   | C    | T    | 0.005556 0 | 1 |
| 2261 | 8  | chr8:103297404  | UBR5   | G    | T    | 0.005556 0 | 1 |

|      |    |                |        |    |    |            |   |
|------|----|----------------|--------|----|----|------------|---|
| 2266 | 8  | chr8:103307466 | UBR5   | C  | T  | 0.005556 0 | 1 |
| 2280 | 8  | chr8:103341456 | UBR5   | -  | T  | 0.01111 0  | 2 |
| 2281 | 8  | chr8:103354860 | UBR5   | C  | G  | 0.005556 0 | 1 |
| 4197 | 23 | chrX:41088723  | USP9X  | T  | A  | 0.008 0    | 1 |
| 1083 | 4  | chr4:1961342   | WHSC1  | T  | C  | 0.005556 0 | 1 |
| 1084 | 4  | chr4:1976481   | WHSC1  | G  | T  | 0.04444 4  | 0 |
| 1085 | 4  | chr4:1976483   | WHSC1  | G  | C  | 0.03333 3  | 0 |
| 1086 | 4  | chr4:1976485   | WHSC1  | GG | AC | 0.005556 0 | 1 |
| 1087 | 4  | chr4:1976486   | WHSC1  | G  | C  | 0.005556 0 | 1 |
| 2140 | 8  | chr8:30938754  | WRN    | -  | T  | 0.005556 0 | 1 |
| 2145 | 8  | chr8:30989869  | WRN    | C  | A  | 0.005556 0 | 1 |
| 2152 | 8  | chr8:31004834  | WRN    | A  | T  | 0.005556 0 | 1 |
| 2157 | 8  | chr8:31024684  | WRN    | T  | G  | 0.005556 0 | 1 |
| 2870 | 12 | chr12:6777111  | ZNF384 | -  | C  | 0.06667 6  | 0 |
| 2873 | 12 | chr12:6788242  | ZNF384 | C  | T  | 0.005556 0 | 1 |

 Variants reported in ICGC

| A2A2 | O(HET)  | E(HET)  | P          | Location  | Allele | Consequen   | IMPACT   | SYMBOL   |
|------|---------|---------|------------|-----------|--------|-------------|----------|----------|
| 89   | 0.01111 | 0.01105 | 1          | 2:1486728 | T      | stop_gaine  | HIGH     | ACVR2A   |
| 89   | 0.01111 | 0.01105 | 1          | 12:438462 | T      | intron_vari | MODIFIER | ADAMTS20 |
| 89   | 0.01111 | 0.01105 | 1          | 4:8796727 | C      | intron_vari | MODIFIER | AFF1     |
| 89   | 0.01111 | 0.01105 | 1          | 4:8796793 | T      | synonymo    | LOW      | AFF1     |
| 89   | 0.01111 | 0.01105 | 1          | 7:9163123 | C      | missense_\  | MODERATE | AKAP9    |
| 89   | 0.01111 | 0.01105 | 1          | 7:9164167 | TGC    | intron_vari | MODIFIER | AKAP9    |
| 89   | 0.01111 | 0.01105 | 1          | 7:9167006 | C      | missense_\  | MODERATE | AKAP9    |
| 89   | 0.01111 | 0.01105 | 1          | 7:9167209 | G      | intron_vari | MODIFIER | AKAP9    |
| 89   | 0.01111 | 0.01105 | 1          | 7:9169937 | A      | frameshift_ | HIGH     | AKAP9    |
| 89   | 0.01111 | 0.01105 | 1          | 7:9170915 | G      | missense_\  | MODERATE | AKAP9    |
| 89   | 0.01111 | 0.01105 | 1          | 7:9171272 | A      | missense_\  | MODERATE | AKAP9    |
| 89   | 0.01111 | 0.01105 | 1          | 19:407412 | A      | missense_\  | MODERATE | AKT2     |
| 89   | 0.01111 | 0.01105 | 1          | 1:2437272 | -      | intron_vari | MODIFIER | AKT3     |
| 89   | 0.01111 | 0.01105 | 1          | 2:2949830 | -      | frameshift_ | HIGH     | ALK      |
| 89   | 0.01111 | 0.01105 | 1          | 5:1121646 | A      | missense_\  | MODERATE | APC      |
| 89   | 0.01111 | 0.01105 | 1          | 5:1121646 | -      | frameshift_ | HIGH     | APC      |
| 89   | 0.01111 | 0.01105 | 1          | 5:1121739 | TA     | stop_gaine  | HIGH     | APC      |
| 89   | 0.01111 | 0.01105 | 1          | 5:1121752 | -      | frameshift_ | HIGH     | APC      |
| 89   | 0.01111 | 0.01105 | 1          | 5:1121756 | -      | frameshift_ | HIGH     | APC      |
| 31   | 0       | 0.2024  | 5.546e-006 | X:6694360 | -      | frameshift_ | HIGH     | AR       |
| 89   | 0.01111 | 0.01105 | 1          | 1:2709281 | -      | frameshift_ | HIGH     | ARID1A   |
| 89   | 0.01111 | 0.01105 | 1          | 1:2709282 | T      | missense_\  | MODERATE | ARID1A   |
| 87   | 0.02222 | 0.04346 | 0.03342    | 1:2709769 | A      | stop_gaine  | HIGH     | ARID1A   |
| 89   | 0       | 0.02198 | 0.005587   | 1:2709900 | -      | frameshift_ | HIGH     | ARID1A   |
| 89   | 0.01111 | 0.01105 | 1          | 1:2710634 | T      | missense_\  | MODERATE | ARID1A   |
| 89   | 0.01111 | 0.01105 | 1          | 12:462856 | C      | missense_\  | MODERATE | ARID2    |
| 89   | 0.01111 | 0.01105 | 1          | 1:1508089 | A      | intron_vari | MODIFIER | ARNT     |
| 89   | 0.01111 | 0.01105 | 1          | 11:108117 | TTA    | intron_vari | MODIFIER | ATM      |
| 89   | 0.01111 | 0.01105 | 1          | 11:108175 | G      | intron_vari | MODIFIER | ATM      |
| 89   | 0.01111 | 0.01105 | 1          | 11:108201 | C      | synonymo    | LOW      | ATM      |
| 89   | 0.01111 | 0.01105 | 1          | 3:1421766 | -      | intron_vari | MODIFIER | ATR      |
| 89   | 0.01111 | 0.01105 | 1          | 3:1421766 | A      | intron_vari | MODIFIER | ATR      |
| 89   | 0.01111 | 0.01105 | 1          | 3:1421868 | -      | frameshift_ | HIGH     | ATR      |
| 89   | 0.01111 | 0.01105 | 1          | 3:1422691 | G      | missense_\  | MODERATE | ATR      |
| 88   | 0.02222 | 0.02198 | 1          | 3:1422726 | A      | intron_vari | MODIFIER | ATR      |
| 89   | 0.01111 | 0.01105 | 1          | 3:1422746 | A      | intron_vari | MODIFIER | ATR      |
| 34   | 0.02857 | 0.02816 | 1          | X:7684916 | T      | splice_don  | HIGH     | ATRX     |
| 89   | 0.01111 | 0.01105 | 1          | 20:549593 | T      | frameshift_ | HIGH     | AURKA    |
| 89   | 0.01111 | 0.01105 | 1          | 17:810987 | C      | synonymo    | LOW      | AURKB    |
| 89   | 0.01111 | 0.01105 | 1          | 19:577447 | T      | intron_vari | MODIFIER | AURKC    |
| 89   | 0.01111 | 0.01105 | 1          | 6:6934919 | A      | missense_\  | MODERATE | BAI3     |
| 89   | 0.01111 | 0.01105 | 1          | 6:7007124 | G      | missense_\  | MODERATE | BAI3     |
| 89   | 0.01111 | 0.01105 | 1          | 1:8573337 | C      | synonymo    | LOW      | BCL10    |
| 89   | 0.01111 | 0.01105 | 1          | 1:8573659 | T      | splice_regi | LOW      | BCL10    |
| 89   | 0.01111 | 0.01105 | 1          | 2:6077306 | G      | intron_vari | MODIFIER | BCL11A   |

|    |         |         |         |           |     |                     |                    |
|----|---------|---------|---------|-----------|-----|---------------------|--------------------|
| 89 | 0.01111 | 0.01105 | 1       | 3:1874470 | A   | missense_\ MODERATE | BCL6               |
| 89 | 0.01111 | 0.01105 | 1       | 1:1470906 | T   | stop_gaine          | HIGH BCL9          |
| 89 | 0.01111 | 0.01105 | 1       | 1:1470940 | T   | intron_vari         | MODIFIER BCL9      |
| 89 | 0.01111 | 0.01105 | 1       | 11:102195 | C   | missense_\ MODERATE | BIRC3              |
| 89 | 0.01111 | 0.01105 | 1       | 11:102195 | T   | missense_\ MODERATE | BIRC3              |
| 89 | 0.01111 | 0.01105 | 1       | 11:102201 | C   | synonymo            | LOW BIRC3          |
| 88 | 0.02222 | 0.02198 | 1       | 11:102207 | A   | missense_\ MODERATE | BIRC3              |
| 89 | 0.01111 | 0.01105 | 1       | 11:102207 | C   | missense_\ MODERATE | BIRC3              |
| 89 | 0.01111 | 0.01105 | 1       | 17:762103 | A   | 5_prime_U           | MODIFIER BIRC5     |
| 85 | 0.05556 | 0.05401 | 1       | 17:762196 | T   | 3_prime_U           | MODIFIER BIRC5     |
| 88 | 0.02222 | 0.02198 | 1       | 15:913041 | T   | missense_\ MODERATE | BLM                |
| 89 | 0.01111 | 0.01105 | 1       | 15:913474 | A   | missense_\ MODERATE | BLM                |
| 84 | 0.06667 | 0.06444 | 1       | 10:979751 | -   | intron_vari         | MODIFIER BLNK      |
| 89 | 0.01111 | 0.01105 | 1       | 17:597606 | C   | 3_prime_U           | MODIFIER BRIP1     |
| 89 | 0.01111 | 0.01105 | 1       | 17:598581 | T   | intron_vari         | MODIFIER BRIP1     |
| 89 | 0.01111 | 0.01105 | 1       | 17:598615 | A   | intron_vari         | MODIFIER BRIP1     |
| 89 | 0.01111 | 0.01105 | 1       | 7:2968269 | C   | missense_\ MODERATE | CARD11             |
| 89 | 0.01111 | 0.01105 | 1       | 15:409138 | T   | missense_\ MODERATE | CASC5              |
| 89 | 0.01111 | 0.01105 | 1       | 15:409495 | -   | intron_vari         | MODIFIER CASC5     |
| 89 | 0.01111 | 0.01105 | 1       | 11:119145 | -   | intron_vari         | MODIFIER CBL       |
| 89 | 0.01111 | 0.01105 | 1       | 1:1931109 | G   | intron_vari         | MODIFIER CDC73     |
| 89 | 0.01111 | 0.01105 | 1       | 1:1931112 | A   | intron_vari         | MODIFIER CDC73     |
| 89 | 0.01111 | 0.01105 | 1       | 16:688440 | T   | intron_vari         | MODIFIER CDH1      |
| 89 | 0.01111 | 0.01105 | 1       | 16:650269 | G   | intron_vari         | MODIFIER CDH11     |
| 89 | 0.01111 | 0.01105 | 1       | 18:255898 | A   | intron_vari         | MODIFIER CDH2      |
| 89 | 0.01111 | 0.01105 | 1       | 18:255937 | A   | missense_\ MODERATE | CDH2               |
| 85 | 0.05556 | 0.05401 | 1       | 18:592218 | A   | missense_\ MODERATE | CDH20              |
| 89 | 0.01111 | 0.01105 | 1       | 17:376277 | G   | missense_\ MODERATE | CDK12              |
| 89 | 0.01111 | 0.01105 | 1       | 12:581431 | -   | intron_vari         | MODIFIER CDK4      |
| 89 | 0.01111 | 0.01105 | 1       | 9:2199415 | C   | intron_vari         | MODIFIER RP11-145E |
| 89 | 0.01111 | 0.01105 | 1       | 19:427910 | T   | synonymo            | LOW CIC            |
| 89 | 0.01111 | 0.01105 | 1       | 19:427984 | G   | splice_regi         | LOW CIC            |
| 88 | 0.01111 | 0.03278 | 0.01676 | 17:482770 | -   | intron_vari         | MODIFIER COL1A1    |
| 89 | 0.01111 | 0.01105 | 1       | 3:3194271 | C   | missense_\ MODERATE | CRBN               |
| 89 | 0.01111 | 0.01105 | 1       | 3:3197988 | G   | intron_vari         | MODIFIER CRBN      |
| 89 | 0.01111 | 0.01105 | 1       | 16:384361 | G   | synonymo            | LOW CREBBP         |
| 88 | 0.02222 | 0.02198 | 1       | 8:1132540 | -   | intron_vari         | MODIFIER CSMD3     |
| 89 | 0.01111 | 0.01105 | 1       | 8:1133017 | TTA | intron_vari         | MODIFIER CSMD3     |
| 89 | 0.01111 | 0.01105 | 1       | 8:1133233 | G   | splice_acce         | HIGH CSMD3         |
| 87 | 0.03333 | 0.03278 | 1       | 8:1135162 | G   | intron_vari         | MODIFIER CSMD3     |
| 89 | 0.01111 | 0.01105 | 1       | 8:1135689 | G   | intron_vari         | MODIFIER CSMD3     |
| 89 | 0.01111 | 0.01105 | 1       | 5:1382665 | G   | missense_\ MODERATE | CTNNA1             |
| 89 | 0.01111 | 0.01105 | 1       | 5:1382697 | -   | inframe_de          | MODERATE CTNNA1    |
| 89 | 0.01111 | 0.01105 | 1       | 3:4126719 | A   | missense_\ MODERATE | CTNNB1             |
| 89 | 0.01111 | 0.01105 | 1       | 10:965416 | G   | missense_\ MODERATE | CYP2C19            |
| 89 | 0.01111 | 0.01105 | 1       | 22:425248 | T   | missense_\ MODERATE | CYP2D6             |
| 89 | 0.01111 | 0.01105 | 1       | 18:504516 | G   | missense_\ MODERATE | DCC                |

|    |         |         |            |           |    |                     |                |
|----|---------|---------|------------|-----------|----|---------------------|----------------|
| 89 | 0.01111 | 0.01105 | 1          | 18:504516 | C  | missense_\ MODERATE | DCC            |
| 89 | 0.01111 | 0.01105 | 1          | 18:509425 | T  | missense_\ MODERATE | DCC            |
| 89 | 0.01111 | 0.01105 | 1          | 18:509768 | C  | intron_vari         | MODIFIER DCC   |
| 88 | 0.02222 | 0.02198 | 1          | 1:1627371 | T  | splice_regi         | LOW DDR2       |
| 88 | 0.02222 | 0.02198 | 1          | 1:1627403 | CG | intron_vari         | MODIFIER DDR2  |
| 89 | 0.01111 | 0.01105 | 1          | 1:1627483 | T  | missense_\ MODERATE | DDR2           |
| 89 | 0.01111 | 0.01105 | 1          | 14:955698 | A  | synonymo            | LOW DICER1     |
| 89 | 0.01111 | 0.01105 | 1          | 2:2545714 | G  | stop_lost           | HIGH DNMT3A    |
| 89 | 0.01111 | 0.01105 | 1          | 2:2552301 | A  | missense_\ MODERATE | DNMT3A         |
| 89 | 0.01111 | 0.01105 | 1          | 1:9756404 | G  | splice_regi         | LOW DPYD       |
| 89 | 0.01111 | 0.01105 | 1          | 1:9814476 | T  | intron_vari         | MODIFIER DPYD  |
| 89 | 0.01111 | 0.01105 | 1          | 1:9820604 | C  | intron_vari         | MODIFIER DPYD  |
| 89 | 0.01111 | 0.01105 | 1          | 1:9838648 | A  | 5_prime_U           | MODIFIER DPYD  |
| 74 | 0.1778  | 0.162   | 1          | 6:5634110 | A  | missense_\ MODERATE | DST            |
| 89 | 0.01111 | 0.01105 | 1          | 6:5634753 | C  | missense_\ MODERATE | DST            |
| 89 | 0.01111 | 0.01105 | 1          | 6:5635015 | C  | synonymo            | LOW DST        |
| 89 | 0.01111 | 0.01105 | 1          | 6:5641714 | G  | missense_\ MODERATE | DST            |
| 89 | 0.01111 | 0.01105 | 1          | 6:5641744 | C  | missense_\ MODERATE | DST            |
| 89 | 0       | 0.02198 | 0.005587   | 6:5648509 | -  | intron_vari         | MODIFIER DST   |
| 89 | 0.01111 | 0.01105 | 1          | 6:5648526 | C  | intron_vari         | MODIFIER DST   |
| 89 | 0.01111 | 0.01105 | 1          | 6:5648946 | -  | intron_vari         | MODIFIER DST   |
| 87 | 0       | 0.06444 | 2.705e-006 | 22:415428 | -  | intron_vari         | MODIFIER EP300 |
| 89 | 0.01111 | 0.01105 | 1          | 22:415509 | A  | intron_vari         | MODIFIER EP300 |
| 89 | 0.01111 | 0.01105 | 1          | 12:132466 | A  | missense_\ MODERATE | EP400          |
| 89 | 0.01111 | 0.01105 | 1          | 12:132490 | A  | missense_\ MODERATE | EP400          |
| 89 | 0.01111 | 0.01105 | 1          | 12:132497 | T  | synonymo            | LOW EP400      |
| 89 | 0.01111 | 0.01105 | 1          | 12:132529 | C  | intron_vari         | MODIFIER EP400 |
| 89 | 0.01111 | 0.01105 | 1          | 12:132535 | G  | missense_\ MODERATE | EP400          |
| 89 | 0       | 0.02198 | 0.005587   | 12:132562 | C  | missense_\ MODERATE | EP400          |
| 89 | 0.01111 | 0.01105 | 1          | 3:8944846 | C  | splice_regi         | LOW EPHA3      |
| 89 | 0.01111 | 0.01105 | 1          | 3:8946227 | C  | intron_vari         | MODIFIER EPHA3 |
| 89 | 0.01111 | 0.01105 | 1          | 3:8946229 | C  | missense_\ MODERATE | EPHA3          |
| 83 | 0.04444 | 0.1049  | 0.0005534  | 6:9396800 | C  | splice_acce         | HIGH EPHA7     |
| 89 | 0.01111 | 0.01105 | 1          | 6:9397353 | G  | intron_vari         | MODIFIER EPHA7 |
| 89 | 0.01111 | 0.01105 | 1          | 6:9412896 | C  | splice_regi         | LOW EPHA7      |
| 89 | 0.01111 | 0.01105 | 1          | 3:1348858 | T  | synonymo            | LOW EPHB1      |
| 89 | 0.01111 | 0.01105 | 1          | 17:378683 | A  | intron_vari         | MODIFIER ERBB2 |
| 89 | 0.01111 | 0.01105 | 1          | 17:378687 | C  | intron_vari         | MODIFIER ERBB2 |
| 89 | 0.01111 | 0.01105 | 1          | 17:378836 | T  | synonymo            | LOW ERBB2      |
| 89 | 0.01111 | 0.01105 | 1          | 12:564790 | T  | intron_vari         | MODIFIER ERBB3 |
| 89 | 0.01111 | 0.01105 | 1          | 2:2122486 | T  | synonymo            | LOW ERBB4      |
| 89 | 0.01111 | 0.01105 | 1          | 2:2124951 | T  | intron_vari         | MODIFIER ERBB4 |
| 89 | 0.01111 | 0.01105 | 1          | 2:2129894 | T  | intron_vari         | MODIFIER ERBB4 |
| 89 | 0       | 0.02198 | 0.005587   | 21:398174 | C  | synonymo            | LOW ERG        |
| 89 | 0.01111 | 0.01105 | 1          | 7:1395094 | T  | intron_vari         | MODIFIER ETV1  |
| 89 | 0.01111 | 0.01105 | 1          | 17:416105 | G  | missense_\ MODERATE | ETV4           |
| 89 | 0.01111 | 0.01105 | 1          | 8:1188251 | A  | missense_\ MODERATE | EXT1           |

|    |         |         |            |                    |                 |          |          |
|----|---------|---------|------------|--------------------|-----------------|----------|----------|
| 89 | 0.01111 | 0.01105 | 1          | 8:1191224:A        | synonymou       | LOW      | EXT1     |
| 89 | 0.01111 | 0.01105 | 1          | 11:442285:-        | intron_vari     | MODIFIER | EXT2     |
| 87 | 0.03333 | 0.03278 | 1          | 7:1485235:A        | intron_vari     | MODIFIER | EZH2     |
| 34 | 0.02857 | 0.02816 | 1          | X:6341163:ATAGAACT | frameshift_HIGH |          | AMER1    |
| 89 | 0.01111 | 0.01105 | 1          | 16:898577:C        | intron_vari     | MODIFIER | FANCA    |
| 89 | 0.01111 | 0.01105 | 1          | 16:898773:A        | intron_vari     | MODIFIER | FANCA    |
| 89 | 0.01111 | 0.01105 | 1          | 3:1008829:G        | missense_       | MODERATE | FANCD2   |
| 88 | 0.02222 | 0.02198 | 1          | 3:1013203:-        | frameshift_HIGH |          | FANCD2   |
| 89 | 0       | 0.02198 | 0.005587   | 19:814601:G        | intron_vari     | MODIFIER | FBN3     |
| 89 | 0.01111 | 0.01105 | 1          | 4:1532440:A        | stop_gaine      | HIGH     | FBXW7    |
| 82 | 0.08889 | 0.08494 | 1          | 8:3827235:A        | synonymou       | LOW      | FGFR1    |
| 89 | 0.01111 | 0.01105 | 1          | 10:123246:C        | missense_       | MODERATE | FGFR2    |
| 89 | 0.01111 | 0.01105 | 1          | 4:1803325:-        | intron_vari     | MODIFIER | FGFR3    |
| 88 | 0.02222 | 0.02198 | 1          | 4:1807544:-        | frameshift_HIGH |          | FGFR3    |
| 89 | 0.01111 | 0.01105 | 1          | 5:1765204:A        | synonymou       | LOW      | FGFR4    |
| 88 | 0       | 0.04346 | 9.469e-005 | 13:285974:-        | intron_vari     | MODIFIER | FLT3     |
| 89 | 0.01111 | 0.01105 | 1          | 5:1800359:G        | missense_       | MODERATE | FLT4     |
| 89 | 0.01111 | 0.01105 | 1          | 2:2162325:G        | intron_vari     | MODIFIER | FN1      |
| 89 | 0.01111 | 0.01105 | 1          | 2:2162370:C        | missense_       | MODERATE | FN1      |
| 89 | 0.01111 | 0.01105 | 1          | 2:2162729:A        | intron_vari     | MODIFIER | FN1      |
| 89 | 0.01111 | 0.01105 | 1          | 13:411348:C        | missense_       | MODERATE | FOXO1    |
| 89 | 0.01111 | 0.01105 | 1          | 6:1089852:G        | missense_       | MODERATE | FOXO3    |
| 89 | 0.01111 | 0.01105 | 1          | 3:7117970:C        | frameshift_HIGH |          | FOXP1    |
| 89 | 0.01111 | 0.01105 | 1          | 6:4155905:T        | missense_       | MODERATE | FOXP4    |
| 89 | 0.01111 | 0.01105 | 1          | 19:353182:G        | intron_vari     | MODIFIER | FZR1     |
| 84 | 0.05556 | 0.07475 | 0.114      | 3:1282027:C        | synonymou       | LOW      | GATA2    |
| 68 | 0.2444  | 0.2146  | 0.3487     | 20:574284:G        | synonymou       | LOW      | GNAS     |
| 89 | 0.01111 | 0.01105 | 1          | 8:3769141:A        | intron_vari     | MODIFIER | GPR124   |
| 89 | 0       | 0.02198 | 0.005587   | 2:1175100:T        | missense_       | MODERATE | GREB1    |
| 89 | 0.01111 | 0.01105 | 1          | 11:106579:A        | synonymou       | LOW      | GUCY1A2  |
| 89 | 0.01111 | 0.01105 | 1          | 8:4286845:-        | intron_vari     | MODIFIER | HOOK3    |
| 89 | 0.01111 | 0.01105 | 1          | 14:102548:G        | missense_       | MODERATE | HSP90AA1 |
| 89 | 0.01111 | 0.01105 | 1          | 14:102548:C        | intron_vari     | MODIFIER | HSP90AA1 |
| 89 | 0.01111 | 0.01105 | 1          | 15:906282:A        | missense_       | MODERATE | IDH2     |
| 89 | 0.01111 | 0.01105 | 1          | 15:992507:C        | intron_vari     | MODIFIER | IGF1R    |
| 89 | 0.01111 | 0.01105 | 1          | 15:994601:T        | intron_vari     | MODIFIER | IGF1R    |
| 88 | 0.02222 | 0.02198 | 1          | 6:1604121:T        | intron_vari     | MODIFIER | IGF2R    |
| 89 | 0.01111 | 0.01105 | 1          | 6:1604910:G        | missense_       | MODERATE | IGF2R    |
| 89 | 0.01111 | 0.01105 | 1          | 8:4217529:C        | splice_regio    | LOW      | IKBKB    |
| 89 | 0.01111 | 0.01105 | 1          | 1:2066476:T        | intron_vari     | MODIFIER | IKBKE    |
| 89 | 0.01111 | 0.01105 | 1          | 5:5523709:C        | missense_       | MODERATE | IL6ST    |
| 89 | 0.01111 | 0.01105 | 1          | 5:5523759:A        | missense_       | MODERATE | IL6ST    |
| 89 | 0.01111 | 0.01105 | 1          | 5:5524726:-        | intron_vari     | MODIFIER | IL6ST    |
| 89 | 0.01111 | 0.01105 | 1          | 5:5525634:T        | missense_       | MODERATE | IL6ST    |
| 89 | 0.01111 | 0.01105 | 1          | 5:5526428:G        | intron_vari     | MODIFIER | IL6ST    |
| 89 | 0.01111 | 0.01105 | 1          | 6:397155-3:T       | synonymou       | LOW      | IRF4     |
| 89 | 0.01111 | 0.01105 | 1          | 13:110434:T        | synonymou       | LOW      | IRS2     |

|    |         |         |            |           |     |             |          |        |
|----|---------|---------|------------|-----------|-----|-------------|----------|--------|
| 89 | 0.01111 | 0.01105 | 1          | 1:1455283 | T   | stop_gaine  | HIGH     | ITGA10 |
| 89 | 0.01111 | 0.01105 | 1          | 1:1455283 | A   | splice_regi | LOW      | ITGA10 |
| 86 | 0.04444 | 0.04346 | 1          | 1:1455309 | T   | missense_\  | MODERATE | ITGA10 |
| 87 | 0.03333 | 0.03278 | 1          | 1:1455338 | -   | frameshift_ | HIGH     | ITGA10 |
| 89 | 0.01111 | 0.01105 | 1          | 3:3756751 | C   | splice_acce | HIGH     | ITGA9  |
| 89 | 0.01111 | 0.01105 | 1          | 3:3779190 | A   | intron_vari | MODIFIER | ITGA9  |
| 88 | 0       | 0.04346 | 9.469e-005 | 21:463270 | A   | intron_vari | MODIFIER | ITGB2  |
| 89 | 0.01111 | 0.01105 | 1          | 17:453608 | A   | missense_\  | MODERATE | ITGB3  |
| 89 | 0.01111 | 0.01105 | 1          | 17:453617 | T   | intron_vari | MODIFIER | ITGB3  |
| 89 | 0.01111 | 0.01105 | 1          | 17:453778 | C   | missense_\  | MODERATE | ITGB3  |
| 89 | 0.01111 | 0.01105 | 1          | 17:453778 | A   | missense_\  | MODERATE | ITGB3  |
| 89 | 0       | 0.02198 | 0.005587   | 9:5081778 | TA  | stop_gaine  | HIGH     | JAK2   |
| 89 | 0.01111 | 0.01105 | 1          | 9:5090443 | G   | splice_regi | LOW      | JAK2   |
| 89 | 0       | 0.02198 | 0.005587   | 8:4179104 | A   | frameshift_ | HIGH     | KAT6A  |
| 79 | 0.1111  | 0.1244  | 0.3243     | 10:767354 | -   | frameshift_ | HIGH     | KAT6B  |
| 89 | 0.01111 | 0.01105 | 1          | 10:767360 | C   | missense_\  | MODERATE | KAT6B  |
| 89 | 0.01111 | 0.01105 | 1          | 10:767449 | -   | frameshift_ | HIGH     | KAT6B  |
| 89 | 0.01111 | 0.01105 | 1          | 10:767449 | T   | missense_\  | MODERATE | KAT6B  |
| 88 | 0.02222 | 0.02198 | 1          | 10:767449 | G   | missense_\  | MODERATE | KAT6B  |
| 35 | 0       | 0       | 1          | X:5324505 | T   | missense_\  | MODERATE | KDM5C  |
| 34 | 0.02857 | 0.02816 | 1          | X:4494286 | C   | intron_vari | MODIFIER | KDM6A  |
| 87 | 0       | 0.06444 | 2.705e-006 | 4:5595374 | -   | intron_vari | MODIFIER | KDR    |
| 89 | 0.01111 | 0.01105 | 1          | 4:5597090 | G   | missense_\  | MODERATE | KDR    |
| 89 | 0.01111 | 0.01105 | 1          | 4:5598029 | A   | missense_\  | MODERATE | KDR    |
| 89 | 0.01111 | 0.01105 | 1          | 4:5598150 | T   | frameshift_ | HIGH     | KDR    |
| 89 | 0.01111 | 0.01105 | 1          | 19:106005 | A   | missense_\  | MODERATE | KEAP1  |
| 89 | 0.01111 | 0.01105 | 1          | 10:382427 | C   | missense_\  | MODERATE | KLF6   |
| 89 | 0.01111 | 0.01105 | 1          | 12:253982 | CGC | inframe_in  | MODERATE | KRAS   |
| 89 | 0.01111 | 0.01105 | 1          | 5:3848187 | G   | missense_\  | MODERATE | LIFR   |
| 89 | 0.01111 | 0.01105 | 1          | 5:3848232 | T   | splice_regi | LOW      | LIFR   |
| 89 | 0.01111 | 0.01105 | 1          | 5:3848609 | T   | intron_vari | MODIFIER | LIFR   |
| 89 | 0.01111 | 0.01105 | 1          | 5:3849971 | A   | intron_vari | MODIFIER | LIFR   |
| 89 | 0.01111 | 0.01105 | 1          | 5:3850282 | C   | missense_\  | MODERATE | LIFR   |
| 89 | 0.01111 | 0.01105 | 1          | 4:6259909 | G   | missense_\  | MODERATE | LPHN3  |
| 89 | 0.01111 | 0.01105 | 1          | 4:6289731 | A   | missense_\  | MODERATE | LPHN3  |
| 89 | 0.01111 | 0.01105 | 1          | 2:1410794 | G   | intron_vari | MODIFIER | LRP1B  |
| 83 | 0       | 0.1435  | 2.919e-011 | 2:1412020 | CA  | splice_regi | LOW      | LRP1B  |
| 89 | 0.01111 | 0.01105 | 1          | 2:1412140 | G   | synonymo    | LOW      | LRP1B  |
| 89 | 0.01111 | 0.01105 | 1          | 2:1412329 | C   | intron_vari | MODIFIER | LRP1B  |
| 89 | 0.01111 | 0.01105 | 1          | 2:1412993 | T   | missense_\  | MODERATE | LRP1B  |
| 89 | 0.01111 | 0.01105 | 1          | 2:1415985 | C   | missense_\  | MODERATE | LRP1B  |
| 89 | 0.01111 | 0.01105 | 1          | 2:1416079 | T   | splice_regi | LOW      | LRP1B  |
| 89 | 0.01111 | 0.01105 | 1          | 2:1416806 | C   | missense_\  | MODERATE | LRP1B  |
| 89 | 0.01111 | 0.01105 | 1          | 2:1418197 | T   | synonymo    | LOW      | LRP1B  |
| 89 | 0.01111 | 0.01105 | 1          | 2:1419866 | A   | intron_vari | MODIFIER | LRP1B  |
| 89 | 0.01111 | 0.01105 | 1          | 2:1420049 | C   | intron_vari | MODIFIER | LRP1B  |
| 89 | 0.01111 | 0.01105 | 1          | 2:1428881 | TA  | intron_vari | MODIFIER | LRP1B  |



|    |         |         |            |               |             |            |        |
|----|---------|---------|------------|---------------|-------------|------------|--------|
| 89 | 0.01111 | 0.01105 | 1          | 3:4650131(A   | splice_acce | HIGH       | LTF    |
| 89 | 0.01111 | 0.01105 | 1          | 3:6537692(T   | synonymou   | LOW        | MAGI1  |
| 89 | 0.01111 | 0.01105 | 1          | 11:957248(C   | missense_   | \ MODERATE | MAML2  |
| 89 | 0.01111 | 0.01105 | 1          | 11:958262(A   | synonymou   | LOW        | MAML2  |
| 89 | 0.01111 | 0.01105 | 1          | 11:958263(A   | missense_   | \ MODERATE | MAML2  |
| 89 | 0.01111 | 0.01105 | 1          | 15:667820(T   | missense_   | \ MODERATE | MAP2K1 |
| 88 | 0.02222 | 0.02198 | 1          | 1:2208086(GC  | intron_vari | MODIFIER   | MARK1  |
| 89 | 0.01111 | 0.01105 | 1          | 19:458058(A   | missense_   | \ MODERATE | MARK4  |
| 84 | 0.06667 | 0.06444 | 1          | 18:477939(G   | upstream_   | MODIFIER   | CCDC11 |
| 89 | 0       | 0.02198 | 0.005587   | 18:478012(C   | intron_vari | MODIFIER   | MBD1   |
| 89 | 0.01111 | 0.01105 | 1          | 1:1505507(G   | missense_   | \ MODERATE | MCL1   |
| 89 | 0.01111 | 0.01105 | 1          | 11:645720(A   | synonymou   | LOW        | MEN1   |
| 89 | 0.01111 | 0.01105 | 1          | 7:1163398(G   | missense_   | \ MODERATE | MET    |
| 79 | 0.1222  | 0.1148  | 1          | 7:1163977(G   | missense_   | \ MODERATE | MET    |
| 89 | 0.01111 | 0.01105 | 1          | 3:6998582(C   | intron_vari | MODIFIER   | MITF   |
| 89 | 0.01111 | 0.01105 | 1          | 3:7000091(G   | intron_vari | MODIFIER   | MITF   |
| 89 | 0.01111 | 0.01105 | 1          | 3:3709004(A   | missense_   | \ MODERATE | MLH1   |
| 89 | 0.01111 | 0.01105 | 1          | 11:118376(T   | missense_   | \ MODERATE | KMT2A  |
| 89 | 0.01111 | 0.01105 | 1          | 11:118390(A   | missense_   | \ MODERATE | KMT2A  |
| 89 | 0       | 0.02198 | 0.005587   | 12:494331(C   | intron_vari | MODIFIER   | KMT2D  |
| 89 | 0.01111 | 0.01105 | 1          | 7:1518596(A   | synonymou   | LOW        | KMT2C  |
| 86 | 0       | 0.08494 | 1.095e-007 | 7:1518792(-   | frameshift_ | HIGH       | KMT2C  |
| 89 | 0       | 0.02198 | 0.005587   | 7:1519021(T   | intron_vari | MODIFIER   | KMT2C  |
| 89 | 0.01111 | 0.01105 | 1          | 7:1519021(T   | intron_vari | MODIFIER   | KMT2C  |
| 89 | 0.01111 | 0.01105 | 1          | 7:1519021(-   | intron_vari | MODIFIER   | KMT2C  |
| 89 | 0.01111 | 0.01105 | 1          | 7:1519479(T   | missense_   | \ MODERATE | KMT2C  |
| 89 | 0.01111 | 0.01105 | 1          | 7:1519710(A   | intron_vari | MODIFIER   | KMT2C  |
| 87 | 0.03333 | 0.03278 | 1          | 10:219012(T   | intron_vari | MODIFIER   | MLLT10 |
| 87 | 0.03333 | 0.03278 | 1          | 10:219012(T   | intron_vari | MODIFIER   | MLLT10 |
| 89 | 0.01111 | 0.01105 | 1          | 10:220220(T   | intron_vari | MODIFIER   | MLLT10 |
| 89 | 0.01111 | 0.01105 | 1          | 1:4380350(T   | 5_prime_U   | MODIFIER   | MPL    |
| 89 | 0.01111 | 0.01105 | 1          | 1:4381848(T   | downstream  | MODIFIER   | MPL    |
| 89 | 0.01111 | 0.01105 | 1          | 11:942240(G   | missense_   | \ MODERATE | MRE11A |
| 89 | 0.01111 | 0.01105 | 1          | 2:4763958(T   | stop_gaine  | HIGH       | MSH2   |
| 89 | 0.01111 | 0.01105 | 1          | 2:4764157(G   | intron_vari | MODIFIER   | MSH2   |
| 87 | 0.02222 | 0.04346 | 0.03342    | 2:4764350(C   | missense_   | \ MODERATE | MSH2   |
| 89 | 0.01111 | 0.01105 | 1          | 2:4770545(-   | inframe_de  | MODERATE   | MSH2   |
| 89 | 0.01111 | 0.01105 | 1          | 1:1116750(C   | 3_prime_U   | MODIFIER   | MTOR   |
| 85 | 0.05556 | 0.05401 | 1          | 1:2369668(TT  | missense_   | \ MODERATE | MTR    |
| 89 | 0.01111 | 0.01105 | 1          | 1:2370162(A   | splice_regi | LOW        | MTR    |
| 89 | 0.01111 | 0.01105 | 1          | 1:2370380(T   | intron_vari | MODIFIER   | MTR    |
| 89 | 0.01111 | 0.01105 | 1          | 1:2370587(G   | missense_   | \ MODERATE | MTR    |
| 89 | 0       | 0.02198 | 0.005587   | 1:1551600(GAC | splice_acce | HIGH       | MUC1   |
| 89 | 0.01111 | 0.01105 | 1          | 1:1551607(G   | synonymou   | LOW        | MUC1   |
| 89 | 0       | 0.02198 | 0.005587   | 1:4579918(T   | stop_gaine  | HIGH       | MUTYH  |
| 89 | 0       | 0.02198 | 0.005587   | 8:1287530(TGA | stop_gaine  | HIGH       | MYC    |
| 89 | 0.01111 | 0.01105 | 1          | 8:1287532(T   | 3_prime_U   | MODIFIER   | MYC    |

|    |         |         |          |                |                              |         |
|----|---------|---------|----------|----------------|------------------------------|---------|
| 89 | 0.01111 | 0.01105 | 1        | 1:4036360!A    | missense_\\ MODERATE MYCL    |         |
| 89 | 0.01111 | 0.01105 | 1        | 2:1608604!A    | synonymo\\ LOW               | MYCN    |
| 89 | 0.01111 | 0.01105 | 1        | 16:158088!G    | missense_\\ MODERATE MYH11   |         |
| 89 | 0.01111 | 0.01105 | 1        | 16:158265!A    | splice_regi\\ LOW            | MYH11   |
| 89 | 0.01111 | 0.01105 | 1        | 22:366901!CC   | intron_vari MODIFIER         | MYH9    |
| 89 | 0.01111 | 0.01105 | 1        | 8:7104101!A    | synonymo\\ LOW               | NCOA2   |
| 89 | 0.01111 | 0.01105 | 1        | 8:7104120!C    | missense_\\ MODERATE NCOA2   |         |
| 89 | 0.01111 | 0.01105 | 1        | 8:7107566!G    | intron_vari MODIFIER         | NCOA2   |
| 89 | 0       | 0.02198 | 0.005587 | 8:7107577!C    | missense_\\ MODERATE NCOA2   |         |
| 89 | 0.01111 | 0.01105 | 1        | 8:7112891!G    | missense_\\ MODERATE NCOA2   |         |
| 88 | 0.02222 | 0.02198 | 1        | 10:515849!A    | missense_\\ MODERATE NCOA4   |         |
| 89 | 0.01111 | 0.01105 | 1        | 10:515864!ATAT | intron_vari MODIFIER         | NCOA4   |
| 89 | 0.01111 | 0.01105 | 1        | 17:295276!A    | intron_vari MODIFIER         | NF1     |
| 88 | 0.02222 | 0.02198 | 1        | 17:295630!TTG  | intron_vari MODIFIER         | NF1     |
| 89 | 0.01111 | 0.01105 | 1        | 17:296840!G    | missense_\\ MODERATE NF1     |         |
| 89 | 0.01111 | 0.01105 | 1        | 2:1780962!G    | missense_\\ MODERATE NFE2L2  |         |
| 89 | 0.01111 | 0.01105 | 1        | 4:1035332!G    | missense_\\ MODERATE NFKB1   |         |
| 89 | 0.01111 | 0.01105 | 1        | 4:1035332!A    | intron_vari MODIFIER         | NFKB1   |
| 89 | 0.01111 | 0.01105 | 1        | 4:1035336!A    | missense_\\ MODERATE NFKB1   |         |
| 89 | 0.01111 | 0.01105 | 1        | 4:1035377!T    | missense_\\ MODERATE NFKB1   |         |
| 89 | 0.01111 | 0.01105 | 1        | 10:104156!A    | intron_vari MODIFIER         | NFKB2   |
| 89 | 0       | 0.02198 | 0.005587 | 14:512213!G    | missense_\\ MODERATE NIN     |         |
| 89 | 0.01111 | 0.01105 | 1        | 14:512253!C    | missense_\\ MODERATE NIN     |         |
| 89 | 0.01111 | 0.01105 | 1        | 17:548720!A    | missense_\\ MODERATE NLRP1   |         |
| 89 | 0.01111 | 0.01105 | 1        | 1:1204779!A    | intron_vari MODIFIER         | NOTCH2  |
| 89 | 0.01111 | 0.01105 | 1        | 1:1205396!C    | missense_\\ MODERATE NOTCH2  |         |
| 89 | 0.01111 | 0.01105 | 1        | 6:3216410!A    | synonymo\\ LOW               | NOTCH4  |
| 89 | 0.01111 | 0.01105 | 1        | 6:3216673!A    | missense_\\ MODERATE NOTCH4  |         |
| 88 | 0.02222 | 0.02198 | 1        | 5:1766372!C    | missense_\\ MODERATE NSD1    |         |
| 89 | 0.01111 | 0.01105 | 1        | 1:1568119!C    | missense_\\ MODERATE INSRR   |         |
| 89 | 0.01111 | 0.01105 | 1        | 1:1568414!A    | missense_\\ MODERATE NTRK1   |         |
| 89 | 0.01111 | 0.01105 | 1        | 15:886695!A    | missense_\\ MODERATE NTRK3   |         |
| 89 | 0       | 0.02198 | 0.005587 | 9:1340906!G    | synonymo\\ LOW               | NUP214  |
| 89 | 0.01111 | 0.01105 | 1        | 11:379485!A    | intron_vari MODIFIER         | NUP98   |
| 35 | 0       | 0       | 1        | X:1104635!T    | intron_vari MODIFIER         | PAK3    |
| 89 | 0.01111 | 0.01105 | 1        | 9:3700654!A    | splice_regi\\ LOW            | PAX5    |
| 89 | 0.01111 | 0.01105 | 1        | 1:1901842!T    | missense_\\ MODERATE PAX7    |         |
| 89 | 0.01111 | 0.01105 | 1        | 3:5261060!C    | missense_\\ MODERATE PBRM1   |         |
| 89 | 0.01111 | 0.01105 | 1        | 3:5261061!G    | missense_\\ MODERATE PBRM1   |         |
| 83 | 0.06667 | 0.08494 | 0.1499   | 1:1448523!T    | 3_prime_U MODIFIER           | PDE4DIP |
| 85 | 0.05556 | 0.05401 | 1        | 1:1448599!T    | missense_\\ MODERATE PDE4DIP |         |
| 86 | 0.04444 | 0.04346 | 1        | 1:1448633!C    | missense_\\ MODERATE PDE4DIP |         |
| 89 | 0.01111 | 0.01105 | 1        | 1:1448633!A    | synonymo\\ LOW               | PDE4DIP |
| 89 | 0.01111 | 0.01105 | 1        | 1:1448633!A    | stop_gaine HIGH              | PDE4DIP |
| 89 | 0.01111 | 0.01105 | 1        | 1:1448633!TT   | missense_\\ MODERATE PDE4DIP |         |
| 89 | 0.01111 | 0.01105 | 1        | 1:1448666!T    | missense_\\ MODERATE PDE4DIP |         |
| 88 | 0.02222 | 0.02198 | 1        | 1:1448666!A    | missense_\\ MODERATE PDE4DIP |         |

|    |         |         |            |           |       |             |            |         |
|----|---------|---------|------------|-----------|-------|-------------|------------|---------|
| 86 | 0.04444 | 0.04346 | 1          | 1:1448790 | C     | missense_   | \ MODERATE | PDE4DIP |
| 89 | 0.01111 | 0.01105 | 1          | 1:1448790 | -     | frameshift_ | HIGH       | PDE4DIP |
| 85 | 0.05556 | 0.05401 | 1          | 1:1448814 | T     | missense_   | \ MODERATE | PDE4DIP |
| 81 | 0.1     | 0.095   | 1          | 1:1448815 | A     | missense_   | \ MODERATE | PDE4DIP |
| 24 | 0.7333  | 0.4644  | 2.399e-009 | 1:1448860 | T     | splice_regi | LOW        | PDE4DIP |
| 86 | 0.04444 | 0.04346 | 1          | 1:1448862 | T     | synonymo    | LOW        | PDE4DIP |
| 89 | 0.01111 | 0.01105 | 1          | 1:1449237 | C     | missense_   | \ MODERATE | PDE4DIP |
| 14 | 0.8444  | 0.4879  | 8.431e-014 | 1:1449305 | A     | intron_vari | MODIFIER   | PDE4DIP |
| 88 | 0.02222 | 0.02198 | 1          | 1:1449309 | C     | intron_vari | MODIFIER   | PDE4DIP |
| 89 | 0.01111 | 0.01105 | 1          | 1:1449314 | C     | intron_vari | MODIFIER   | PDE4DIP |
| 87 | 0.03333 | 0.03278 | 1          | 1:1449946 | T     | missense_   | \ MODERATE | PDE4DIP |
| 84 | 0.06667 | 0.06444 | 1          | 1:1449946 | A     | missense_   | \ MODERATE | PDE4DIP |
| 89 | 0.01111 | 0.01105 | 1          | 1:1449946 | C     | missense_   | \ MODERATE | PDE4DIP |
| 89 | 0       | 0.02198 | 0.005587   | 4:5512989 | C     | synonymo    | LOW        | PDGFRA  |
| 88 | 0       | 0.04346 | 9.469e-005 | 4:5512989 | G     | missense_   | \ MODERATE | PDGFRA  |
| 70 | 0.2222  | 0.1975  | 0.5916     | 5:1494995 | T     | intron_vari | MODIFIER   | PDGFRB  |
| 89 | 0.01111 | 0.01105 | 1          | 5:1495144 | A     | missense_   | \ MODERATE | PDGFRB  |
| 89 | 0.01111 | 0.01105 | 1          | 17:804556 | GC    | intron_vari | MODIFIER   | PER1    |
| 89 | 0.01111 | 0.01105 | 1          | 1:2044388 | G     | missense_   | \ MODERATE | PIK3C2B |
| 89 | 0.01111 | 0.01105 | 1          | 3:1789169 | A     | intron_vari | MODIFIER   | PIK3CA  |
| 89 | 0.01111 | 0.01105 | 1          | 3:1789222 | AA    | intron_vari | MODIFIER   | PIK3CA  |
| 89 | 0.01111 | 0.01105 | 1          | 3:1384615 | G     | missense_   | \ MODERATE | PIK3CB  |
| 89 | 0.01111 | 0.01105 | 1          | 7:1065455 | G     | intron_vari | MODIFIER   | PIK3CG  |
| 89 | 0.01111 | 0.01105 | 1          | 5:6752272 | T     | stop_gaine  | HIGH       | PIK3R1  |
| 89 | 0.01111 | 0.01105 | 1          | 5:6759049 | T     | stop_gaine  | HIGH       | PIK3R1  |
| 89 | 0.01111 | 0.01105 | 1          | 6:5152465 | T     | missense_   | \ MODERATE | PKHD1   |
| 89 | 0.01111 | 0.01105 | 1          | 6:5161305 | T     | missense_   | \ MODERATE | PKHD1   |
| 89 | 0.01111 | 0.01105 | 1          | 6:5188945 | A     | stop_gaine  | HIGH       | PKHD1   |
| 89 | 0.01111 | 0.01105 | 1          | 6:5189049 | A     | missense_   | \ MODERATE | PKHD1   |
| 88 | 0       | 0.04346 | 9.469e-005 | 6:5192181 | GCCTT | intron_vari | MODIFIER   | PKHD1   |
| 89 | 0.01111 | 0.01105 | 1          | 6:5192312 | T     | missense_   | \ MODERATE | PKHD1   |
| 89 | 0.01111 | 0.01105 | 1          | 2:1907193 | C     | synonymo    | LOW        | PMS1    |
| 89 | 0.01111 | 0.01105 | 1          | 2:1907197 | A     | missense_   | \ MODERATE | PMS1    |
| 89 | 0.01111 | 0.01105 | 1          | 7:6027040 | C     | synonymo    | LOW        | PMS2    |
| 88 | 0.02222 | 0.02198 | 1          | 7:6029511 | T     | stop_gaine  | HIGH       | PMS2    |
| 89 | 0.01111 | 0.01105 | 1          | 7:6035156 | G     | intron_vari | MODIFIER   | PMS2    |
| 89 | 0.01111 | 0.01105 | 1          | 7:1244754 | G     | intron_vari | MODIFIER   | POT1    |
| 89 | 0       | 0.02198 | 0.005587   | 17:665115 | G     | splice_regi | LOW        | PRKAR1A |
| 89 | 0.01111 | 0.01105 | 1          | 8:4868692 | C     | synonymo    | LOW        | PRKDC   |
| 89 | 0.01111 | 0.01105 | 1          | 8:4873649 | G     | missense_   | \ MODERATE | PRKDC   |
| 89 | 0.01111 | 0.01105 | 1          | 8:4877604 | G     | synonymo    | LOW        | PRKDC   |
| 89 | 0.01111 | 0.01105 | 1          | 8:4882502 | C     | synonymo    | LOW        | PRKDC   |
| 89 | 0.01111 | 0.01105 | 1          | 8:4882803 | C     | intron_vari | MODIFIER   | PRKDC   |
| 89 | 0.01111 | 0.01105 | 1          | 9:9821221 | T     | missense_   | \ MODERATE | PTCH1   |
| 89 | 0.01111 | 0.01105 | 1          | 9:9824125 | C     | intron_vari | MODIFIER   | PTCH1   |
| 89 | 0.01111 | 0.01105 | 1          | 1:1866469 | A     | intron_vari | MODIFIER   | PTGS2   |
| 89 | 0.01111 | 0.01105 | 1          | 1:1866475 | C     | splice_regi | LOW        | PTGS2   |

|    |         |         |            |             |                      |         |
|----|---------|---------|------------|-------------|----------------------|---------|
| 89 | 0.01111 | 0.01105 | 1          | 12:112910A  | frameshift_HIGH      | PTPN11  |
| 89 | 0       | 0.02198 | 0.005587   | 9:8460646-  | intron_vari MODIFIER | PTPRD   |
| 89 | 0.01111 | 0.01105 | 1          | 9:8485904T  | synonymo LOW         | PTPRD   |
| 89 | 0.01111 | 0.01105 | 1          | 9:8485984T  | missense_ \ MODERATE | PTPRD   |
| 89 | 0       | 0.02198 | 0.005587   | 20:407438G  | intron_vari MODIFIER | PTPRT   |
| 89 | 0.01111 | 0.01105 | 1          | 5:1319244A  | missense_ \ MODERATE | RAD50   |
| 89 | 0.01111 | 0.01105 | 1          | 3:1262640T  | synonymo LOW         | RAF1    |
| 89 | 0.01111 | 0.01105 | 1          | 3:1262673A  | stop_gaine HIGH      | RAF1    |
| 89 | 0.01111 | 0.01105 | 1          | 3:1264134GG | intron_vari MODIFIER | RAF1    |
| 89 | 0.01111 | 0.01105 | 1          | 9:1359813T  | missense_ \ MODERATE | RALGDS  |
| 89 | 0.01111 | 0.01105 | 1          | 17:385047C  | splice_regi LOW      | RARA    |
| 89 | 0.01111 | 0.01105 | 1          | 8:1457373A  | downstrea MODIFIER   | GPT     |
| 88 | 0.02222 | 0.02198 | 1          | 2:6114777I- | frameshift_HIGH      | REL     |
| 88 | 0.02222 | 0.02198 | 1          | 2:6114777G  | missense_ \ MODERATE | REL     |
| 88 | 0.02222 | 0.02198 | 1          | 1:1850566G  | intron_vari MODIFIER | RNF2    |
| 89 | 0.01111 | 0.01105 | 1          | 1:1850671I- | intron_vari MODIFIER | RNF2    |
| 89 | 0.01111 | 0.01105 | 1          | 17:782620T  | missense_ \ MODERATE | RNF213  |
| 89 | 0.01111 | 0.01105 | 1          | 17:782643G  | intron_vari MODIFIER | RNF213  |
| 89 | 0.01111 | 0.01105 | 1          | 17:782687T  | missense_ \ MODERATE | RNF213  |
| 89 | 0.01111 | 0.01105 | 1          | 17:783191T  | stop_gaine HIGH      | RNF213  |
| 88 | 0.02222 | 0.02198 | 1          | 17:783516T  | intron_vari MODIFIER | RNF213  |
| 89 | 0.01111 | 0.01105 | 1          | 17:783575C  | frameshift_HIGH      | RNF213  |
| 89 | 0.01111 | 0.01105 | 1          | 6:1177106G  | missense_ \ MODERATE | ROS1    |
| 89 | 0.01111 | 0.01105 | 1          | 6:1669521T  | intron_vari MODIFIER | RPS6KA2 |
| 89 | 0       | 0.02198 | 0.005587   | 8:9297266C  | missense_ \ MODERATE | RUNX1T1 |
| 89 | 0.01111 | 0.01105 | 1          | 8:9302695A  | missense_ \ MODERATE | RUNX1T1 |
| 89 | 0.01111 | 0.01105 | 1          | 8:9302948A  | missense_ \ MODERATE | RUNX1T1 |
| 87 | 0.03333 | 0.03278 | 1          | 5:233504-2C | intron_vari MODIFIER | SDHA    |
| 89 | 0.01111 | 0.01105 | 1          | 3:4715548A  | missense_ \ MODERATE | SETD2   |
| 89 | 0.01111 | 0.01105 | 1          | 3:4716399G  | missense_ \ MODERATE | SETD2   |
| 89 | 0.01111 | 0.01105 | 1          | 2:1982627G  | synonymo LOW         | SF3B1   |
| 89 | 0.01111 | 0.01105 | 1          | 6:1344987T  | intron_vari MODIFIER | SGK1    |
| 89 | 0.01111 | 0.01105 | 1          | 6:1345285A  | missense_ \ MODERATE | SGK1    |
| 89 | 0.01111 | 0.01105 | 1          | 18:485752T  | missense_ \ MODERATE | SMAD4   |
| 89 | 0.01111 | 0.01105 | 1          | 18:485934C  | synonymo LOW         | SMAD4   |
| 89 | 0.01111 | 0.01105 | 1          | 19:111705T  | synonymo LOW         | SMARCA4 |
| 87 | 0       | 0.06444 | 2.705e-006 | 22:241456C  | intron_vari MODIFIER | SMARCB1 |
| 84 | 0.06667 | 0.06444 | 1          | 22:241676C  | intron_vari MODIFIER | SMARCB1 |
| 89 | 0       | 0.02198 | 0.005587   | 2:5833815T  | frameshift_HIGH      | SOX11   |
| 89 | 0.01111 | 0.01105 | 1          | 3:1814308C  | missense_ \ MODERATE | SOX2    |
| 89 | 0.01111 | 0.01105 | 1          | 20:360313T  | intron_vari MODIFIER | SRC     |
| 88 | 0.02222 | 0.02198 | 1          | 20:360317G  | synonymo LOW         | SRC     |
| 89 | 0.01111 | 0.01105 | 1          | 2:2195448T  | missense_ \ MODERATE | STK36   |
| 89 | 0.01111 | 0.01105 | 1          | 10:104357T  | synonymo LOW         | SUFU    |
| 89 | 0.01111 | 0.01105 | 1          | 9:9360631A  | missense_ \ MODERATE | SYK     |
| 89 | 0.01111 | 0.01105 | 1          | 6:1524579T  | synonymo LOW         | SYNE1   |
| 89 | 0.01111 | 0.01105 | 1          | 6:1524707T  | stop_gaine HIGH      | SYNE1   |

|    |         |         |            |           |      |                     |                 |
|----|---------|---------|------------|-----------|------|---------------------|-----------------|
| 89 | 0.01111 | 0.01105 | 1          | 6:1524728 | C    | missense_\ MODERATE | SYNE1           |
| 89 | 0.01111 | 0.01105 | 1          | 6:1525292 | A    | synonymous          | LOW SYNE1       |
| 89 | 0.01111 | 0.01105 | 1          | 6:1525426 | C    | missense_\ MODERATE | SYNE1           |
| 89 | 0.01111 | 0.01105 | 1          | 6:1526315 | A    | missense_\ MODERATE | SYNE1           |
| 89 | 0.01111 | 0.01105 | 1          | 6:1526319 | A    | synonymous          | LOW SYNE1       |
| 89 | 0.01111 | 0.01105 | 1          | 6:1526392 | A    | missense_\ MODERATE | SYNE1           |
| 89 | 0.01111 | 0.01105 | 1          | 6:1526446 | A    | synonymous          | LOW SYNE1       |
| 89 | 0.01111 | 0.01105 | 1          | 6:1526521 | C    | missense_\ MODERATE | SYNE1           |
| 89 | 0.01111 | 0.01105 | 1          | 6:1526747 | C    | missense_\ MODERATE | SYNE1           |
| 89 | 0.01111 | 0.01105 | 1          | 6:1527126 | A    | missense_\ MODERATE | SYNE1           |
| 89 | 0.01111 | 0.01105 | 1          | 6:1528238 | T    | intron_variable     | MODIFIER SYNE1  |
| 34 | 0.02857 | 0.02816 | 1          | X:7059757 | C    | missense_\ MODERATE | TAF1            |
| 35 | 0       | 0       | 1          | X:7068379 | T    | missense_\ MODERATE | TAF1            |
| 89 | 0.01111 | 0.01105 | 1          | 9:3263174 | A    | missense_\ MODERATE | TAF1L           |
| 34 | 0.02857 | 0.02816 | 1          | X:7927960 | C    | missense_\ MODERATE | TBX22           |
| 88 | 0.02222 | 0.02198 | 1          | 19:164632 | CGAG | intron_variable     | MODIFIER TCF3   |
| 89 | 0.01111 | 0.01105 | 1          | 2:8553477 | -    | frameshift_         | HIGH TCF7L1     |
| 89 | 0.01111 | 0.01105 | 1          | 10:114710 | T    | start_lost          | HIGH TCF7L2     |
| 89 | 0.01111 | 0.01105 | 1          | 10:114911 | T    | missense_\ MODERATE | TCF7L2          |
| 89 | 0.01111 | 0.01105 | 1          | 10:703323 | G    | missense_\ MODERATE | TET1            |
| 89 | 0       | 0.02198 | 0.005587   | 10:704063 | A    | synonymous          | LOW TET1        |
| 89 | 0.01111 | 0.01105 | 1          | 10:704515 | A    | missense_\ MODERATE | TET1            |
| 89 | 0.01111 | 0.01105 | 1          | 4:1061580 | T    | missense_\ MODERATE | TET2            |
| 89 | 0.01111 | 0.01105 | 1          | 4:1061938 | -    | frameshift_         | HIGH TET2       |
| 34 | 0.02857 | 0.02816 | 1          | X:4889687 | T    | missense_\ MODERATE | TFE3            |
| 88 | 0.02222 | 0.02198 | 1          | 15:398848 | T    | missense_\ MODERATE | THBS1           |
| 89 | 0.01111 | 0.01105 | 1          | 17:757963 | -    | intron_variable     | MODIFIER TP53   |
| 89 | 0.01111 | 0.01105 | 1          | 1:1863014 | T    | missense_\ MODERATE | TPR             |
| 89 | 0.01111 | 0.01105 | 1          | 1:1863045 | G    | synonymous          | LOW TPR         |
| 88 | 0.02222 | 0.02198 | 1          | 1:1863152 | T    | intron_variable     | MODIFIER TPR    |
| 89 | 0.01111 | 0.01105 | 1          | 1:1149403 | A    | synonymous          | LOW TRIM33      |
| 89 | 0.01111 | 0.01105 | 1          | 1:1149762 | T    | splice_region       | LOW TRIM33      |
| 89 | 0.01111 | 0.01105 | 1          | 14:924547 | T    | intron_variable     | MODIFIER TRIP11 |
| 88 | 0.02222 | 0.02198 | 1          | 14:924619 | T    | intron_variable     | MODIFIER TRIP11 |
| 89 | 0.01111 | 0.01105 | 1          | 14:924718 | T    | missense_\ MODERATE | TRIP11          |
| 89 | 0.01111 | 0.01105 | 1          | 7:9854332 | G    | intron_variable     | MODIFIER TRRAP  |
| 89 | 0.01111 | 0.01105 | 1          | 7:9855275 | C    | missense_\ MODERATE | TRRAP           |
| 89 | 0.01111 | 0.01105 | 1          | 7:9855276 | T    | stop_gained         | HIGH TRRAP      |
| 89 | 0.01111 | 0.01105 | 1          | 7:9855277 | T    | missense_\ MODERATE | TRRAP           |
| 89 | 0.01111 | 0.01105 | 1          | 7:9857935 | T    | intron_variable     | MODIFIER TRRAP  |
| 88 | 0       | 0.04346 | 9.469e-005 | 16:212945 | T    | intron_variable     | MODIFIER TSC2   |
| 89 | 0.01111 | 0.01105 | 1          | 14:815542 | C    | intron_variable     | MODIFIER TSHR   |
| 89 | 0.01111 | 0.01105 | 1          | 14:815543 | G    | missense_\ MODERATE | TSHR            |
| 89 | 0.01111 | 0.01105 | 1          | 14:816060 | A    | synonymous          | LOW TSHR        |
| 89 | 0.01111 | 0.01105 | 1          | 8:1032849 | T    | missense_\ MODERATE | UBR5            |
| 89 | 0.01111 | 0.01105 | 1          | 8:1032893 | C    | missense_\ MODERATE | UBR5            |
| 89 | 0.01111 | 0.01105 | 1          | 8:1032974 | G    | synonymous          | LOW UBR5        |

|    |         |         |            |           |    |                      |        |
|----|---------|---------|------------|-----------|----|----------------------|--------|
| 89 | 0.01111 | 0.01105 | 1          | 8:1033074 | C  | missense_ \ MODERATE | UBR5   |
| 88 | 0.02222 | 0.02198 | 1          | 8:1033414 | -  | intron_vari MODIFIER | UBR5   |
| 89 | 0.01111 | 0.01105 | 1          | 8:1033548 | C  | synonymo \ LOW       | UBR5   |
| 34 | 0.02857 | 0.02816 | 1          | X:4108872 | T  | intron_vari MODIFIER | USP9X  |
| 89 | 0.01111 | 0.01105 | 1          | 4:1961342 | T  | stop_gaine HIGH      | WHSC1  |
| 86 | 0       | 0.08494 | 1.095e-007 | 4:1976481 | G  | intron_vari MODIFIER | WHSC1  |
| 87 | 0       | 0.06444 | 2.705e-006 | 4:1976483 | G  | intron_vari MODIFIER | WHSC1  |
| 89 | 0.01111 | 0.01105 | 1          | 4:1976485 | GG | intron_vari MODIFIER | WHSC1  |
| 89 | 0.01111 | 0.01105 | 1          | 4:1976486 | G  | intron_vari MODIFIER | WHSC1  |
| 89 | 0.01111 | 0.01105 | 1          | 8:3093875 | -  | frameshift_ HIGH     | WRN    |
| 89 | 0.01111 | 0.01105 | 1          | 8:3098986 | C  | intron_vari MODIFIER | WRN    |
| 89 | 0.01111 | 0.01105 | 1          | 8:3100483 | A  | intron_vari MODIFIER | WRN    |
| 89 | 0.01111 | 0.01105 | 1          | 8:3102468 | T  | missense_ \ MODERATE | WRN    |
| 84 | 0       | 0.1244  | 3.75e-010  | 12:677711 | -  | frameshift_ HIGH     | ZNF384 |
| 89 | 0.01111 | 0.01105 | 1          | 12:678824 | C  | synonymo \ LOW       | ZNF384 |

| Gene            | Feature_ty | Feature         | BIOTYPE        | EXON  | INTRON | HGVSc           | HGVSp           | cDNA_posi |
|-----------------|------------|-----------------|----------------|-------|--------|-----------------|-----------------|-----------|
| ENSG00000180137 | Transcript | ENST00000263950 | protein_coding | 5/11  | -      | ENST00000263950 | ENSP00000263950 | 1222      |
| ENSG00000180137 | Transcript | ENST00000263950 | protein_coding | -     | 13/38  | ENST00000263950 | -               | -         |
| ENSG00000180137 | Transcript | ENST00000263950 | protein_coding | -     | 2/20   | ENST00000263950 | -               | -         |
| ENSG00000180137 | Transcript | ENST00000263950 | protein_coding | 4/21  | -      | ENST00000263950 | ENSP00000263950 | 524       |
| ENSG00000180137 | Transcript | ENST00000263950 | protein_coding | 8/50  | -      | ENST00000263950 | ENSP00000263950 | 2236      |
| ENSG00000180137 | Transcript | ENST00000263950 | protein_coding | -     | 8/49   | ENST00000263950 | -               | -         |
| ENSG00000180137 | Transcript | ENST00000263950 | protein_coding | 18/50 | -      | ENST00000263950 | ENSP00000263950 | 5002      |
| ENSG00000180137 | Transcript | ENST00000263950 | protein_coding | -     | 20/49  | ENST00000263950 | -               | -         |
| ENSG00000180137 | Transcript | ENST00000263950 | protein_coding | 27/50 | -      | ENST00000263950 | ENSP00000263950 | 6591-6592 |
| ENSG00000180137 | Transcript | ENST00000263950 | protein_coding | 31/50 | -      | ENST00000263950 | ENSP00000263950 | 7942      |
| ENSG00000180137 | Transcript | ENST00000263950 | protein_coding | 33/50 | -      | ENST00000263950 | ENSP00000263950 | 8638      |
| ENSG00000180137 | Transcript | ENST00000263950 | protein_coding | 12/14 | -      | ENST00000263950 | ENSP00000263950 | 1488      |
| ENSG00000180137 | Transcript | ENST00000263950 | protein_coding | -     | 9/13   | ENST00000263950 | -               | -         |
| ENSG00000180137 | Transcript | ENST00000263950 | protein_coding | 10/29 | -      | ENST00000263950 | ENSP00000263950 | 2782      |
| ENSG00000180137 | Transcript | ENST00000263950 | protein_coding | 14/16 | -      | ENST00000263950 | ENSP00000263950 | 2076      |
| ENSG00000180137 | Transcript | ENST00000263950 | protein_coding | 14/16 | -      | ENST00000263950 | ENSP00000263950 | 2077      |
| ENSG00000180137 | Transcript | ENST00000263950 | protein_coding | 16/16 | -      | ENST00000263950 | ENSP00000263950 | 3060-3061 |
| ENSG00000180137 | Transcript | ENST00000263950 | protein_coding | 16/16 | -      | ENST00000263950 | ENSP00000263950 | 4297      |
| ENSG00000180137 | Transcript | ENST00000263950 | protein_coding | 16/16 | -      | ENST00000263950 | ENSP00000263950 | 4700-4721 |
| ENSG00000180137 | Transcript | ENST00000263950 | protein_coding | 8/8   | -      | ENST00000263950 | ENSP00000263950 | 3205      |
| ENSG00000180137 | Transcript | ENST00000263950 | protein_coding | 9/20  | -      | ENST00000263950 | ENSP00000263950 | 3212      |
| ENSG00000180137 | Transcript | ENST00000263950 | protein_coding | 9/20  | -      | ENST00000263950 | ENSP00000263950 | 3214      |
| ENSG00000180137 | Transcript | ENST00000263950 | protein_coding | 12/20 | -      | ENST00000263950 | ENSP00000263950 | 3659      |
| ENSG00000180137 | Transcript | ENST00000263950 | protein_coding | 13/20 | -      | ENST00000263950 | ENSP00000263950 | 3797      |
| ENSG00000180137 | Transcript | ENST00000263950 | protein_coding | 20/20 | -      | ENST00000263950 | ENSP00000263950 | 6325      |
| ENSG00000180137 | Transcript | ENST00000263950 | protein_coding | 17/21 | -      | ENST00000263950 | ENSP00000263950 | 5199      |
| ENSG00000180137 | Transcript | ENST00000263950 | protein_coding | -     | 6/21   | ENST00000263950 | -               | -         |
| ENSG00000180137 | Transcript | ENST00000263950 | protein_coding | -     | 8/62   | ENST00000263950 | -               | -         |
| ENSG00000180137 | Transcript | ENST00000263950 | protein_coding | -     | 37/62  | ENST00000263950 | -               | -         |
| ENSG00000180137 | Transcript | ENST00000263950 | protein_coding | 50/63 | -      | ENST00000263950 | ENSP00000263950 | 7762      |
| ENSG00000180137 | Transcript | ENST00000263950 | protein_coding | -     | 44/46  | ENST00000263950 | -               | -         |
| ENSG00000180137 | Transcript | ENST00000263950 | protein_coding | -     | 44/46  | ENST00000263950 | -               | -         |
| ENSG00000180137 | Transcript | ENST00000263950 | protein_coding | 39/47 | -      | ENST00000263950 | ENSP00000263950 | 6740      |
| ENSG00000180137 | Transcript | ENST00000263950 | protein_coding | 14/47 | -      | ENST00000263950 | ENSP00000263950 | 2960      |
| ENSG00000180137 | Transcript | ENST00000263950 | protein_coding | -     | 11/46  | ENST00000263950 | -               | -         |
| ENSG00000180137 | Transcript | ENST00000263950 | protein_coding | -     | 10/46  | ENST00000263950 | -               | -         |
| ENSG00000180137 | Transcript | ENST00000263950 | protein_coding | -     | 26/34  | ENST00000263950 | -               | -         |
| ENSG00000180137 | Transcript | ENST00000263950 | protein_coding | 6/11  | -      | ENST00000263950 | ENSP00000263950 | 917-918   |
| ENSG00000180137 | Transcript | ENST00000263950 | protein_coding | 7/9   | -      | ENST00000263950 | ENSP00000263950 | 718       |
| ENSG00000180137 | Transcript | ENST00000263950 | protein_coding | -     | 4/6    | ENST00000263950 | -               | -         |
| ENSG00000180137 | Transcript | ENST00000263950 | protein_coding | 3/32  | -      | ENST00000263950 | ENSP00000263950 | 1446      |
| ENSG00000180137 | Transcript | ENST00000263950 | protein_coding | 29/32 | -      | ENST00000263950 | ENSP00000263950 | 4899      |
| ENSG00000180137 | Transcript | ENST00000263950 | protein_coding | 3/3   | -      | ENST00000263950 | ENSP00000263950 | 1380      |
| ENSG00000180137 | Transcript | ENST00000263950 | protein_coding | -     | 1/2    | ENST00000263950 | -               | -         |
| ENSG00000180137 | Transcript | ENST00000263950 | protein_coding | -     | 2/3    | ENST00000263950 | -               | -         |



|                      |                            |        |                               |
|----------------------|----------------------------|--------|-------------------------------|
| ENSG0000( Transcript | ENST0000C protein_co 5/10  | -      | ENST0000C ENSP0000C 1541      |
| ENSG0000( Transcript | ENST0000C protein_co 8/10  | -      | ENST0000C ENSP0000C 1476      |
| ENSG0000( Transcript | ENST0000C protein_co -     | 8/9    | ENST0000C - -                 |
| ENSG0000( Transcript | ENST0000C protein_co 2/9   | -      | ENST0000C ENSP0000C 2803      |
| ENSG0000( Transcript | ENST0000C protein_co 2/9   | -      | ENST0000C ENSP0000C 3226      |
| ENSG0000( Transcript | ENST0000C protein_co 6/9   | -      | ENST0000C ENSP0000C 3992      |
| ENSG0000( Transcript | ENST0000C protein_co 9/9   | -      | ENST0000C ENSP0000C 4377      |
| ENSG0000( Transcript | ENST0000C protein_co 9/9   | -      | ENST0000C ENSP0000C 4385      |
| ENSG0000( Transcript | ENST0000C protein_co 1/5   | -      | ENST0000C - 123               |
| ENSG0000( Transcript | ENST0000C protein_co 5/5   | -      | ENST0000C - 639               |
| ENSG0000( Transcript | ENST0000C protein_co 7/22  | -      | ENST0000C ENSP0000C 1660      |
| ENSG0000( Transcript | ENST0000C protein_co 19/22 | -      | ENST0000C ENSP0000C 3773      |
| ENSG0000( Transcript | ENST0000C protein_co -     | 16-Jul | ENST0000C - -                 |
| ENSG0000( Transcript | ENST0000C protein_co 20/20 | -      | ENST0000C - 4027              |
| ENSG0000( Transcript | ENST0000C protein_co -     | 12/19  | ENST0000C - -                 |
| ENSG0000( Transcript | ENST0000C protein_co -     | 11/19  | ENST0000C - -                 |
| ENSG0000( Transcript | ENST0000C protein_co 13/25 | -      | ENST0000C ENSP0000C 2121      |
| ENSG0000( Transcript | ENST0000C protein_co 11/27 | -      | ENST0000C ENSP0000C 1890      |
| ENSG0000( Transcript | ENST0000C protein_co -     | 24/26  | ENST0000C - -                 |
| ENSG0000( Transcript | ENST0000C protein_co -     | 15-Apr | ENST0000C - -                 |
| ENSG0000( Transcript | ENST0000C protein_co -     | 6/16   | ENST0000C - -                 |
| ENSG0000( Transcript | ENST0000C protein_co -     | 7/16   | ENST0000C - -                 |
| ENSG0000( Transcript | ENST0000C protein_co -     | 5/15   | ENST0000C - -                 |
| ENSG0000( Transcript | ENST0000C protein_co -     | 4/12   | ENST0000C - -                 |
| ENSG0000( Transcript | ENST0000C protein_co -     | 4/15   | ENST0000C - -                 |
| ENSG0000( Transcript | ENST0000C protein_co 3/16  | -      | ENST0000C ENSP0000C 754       |
| ENSG0000( Transcript | ENST0000C protein_co 12/12 | -      | ENST0000C ENSP0000C 2752      |
| ENSG0000( Transcript | ENST0000C protein_co 2/14  | -      | ENST0000C ENSP0000C 1730      |
| ENSG0000( Transcript | ENST0000C protein_co -     | 6/7    | ENST0000C - -                 |
| ENSG0000( Transcript | ENST0000C nonsense_        | 4/5    | ENST0000C - -                 |
| ENSG0000( Transcript | ENST0000C protein_co 2/20  | -      | ENST0000C ENSP0000C 247       |
| ENSG0000( Transcript | ENST0000C protein_co 18/20 | -      | ENST0000C ENSP0000C 4366      |
| ENSG0000( Transcript | ENST0000C protein_co -     | Feb-50 | ENST0000C - -                 |
| ENSG0000( Transcript | ENST0000C protein_co 10/11 | -      | ENST0000C ENSP0000C 1040      |
| ENSG0000( Transcript | ENST0000C protein_co -     | 5/10   | ENST0000C - -                 |
| ENSG0000( Transcript | ENST0000C protein_co 4/31  | -      | ENST0000C ENSP0000C 1803      |
| ENSG0000( Transcript | ENST0000C protein_co -     | 65/70  | ENST0000C - -                 |
| ENSG0000( Transcript | ENST0000C protein_co -     | 56/70  | ENST0000C - -                 |
| ENSG0000( Transcript | ENST0000C protein_co -     | 49/70  | ENST0000C - -                 |
| ENSG0000( Transcript | ENST0000C protein_co -     | 29/70  | ENST0000C - -                 |
| ENSG0000( Transcript | ENST0000C protein_co -     | 25/70  | ENST0000C - -                 |
| ENSG0000( Transcript | ENST0000C protein_co 16/18 | -      | ENST0000C ENSP0000C 2287      |
| ENSG0000( Transcript | ENST0000C protein_co 18/18 | -      | ENST0000C ENSP0000C 2750-2752 |
| ENSG0000( Transcript | ENST0000C protein_co 6/15  | -      | ENST0000C ENSP0000C 1060      |
| ENSG0000( Transcript | ENST0000C protein_co 5/9   | -      | ENST0000C ENSP0000C 774       |
| ENSG0000( Transcript | ENST0000C protein_co 4/9   | -      | ENST0000C ENSP0000C 674       |
| ENSG0000( Transcript | ENST0000C protein_co 5/29  | -      | ENST0000C ENSP0000C 1503      |



|                      |                            |       |                           |
|----------------------|----------------------------|-------|---------------------------|
| ENSG0000( Transcript | ENST0000C protein_co 5/29  | -     | ENST0000C ENSP0000C 1523  |
| ENSG0000( Transcript | ENST0000C protein_co 21/29 | -     | ENST0000C ENSP0000C 3779  |
| ENSG0000( Transcript | ENST0000C protein_co -     | 22/28 | ENST0000C - -             |
| ENSG0000( Transcript | ENST0000C protein_co -     | 12/18 | ENST0000C - -             |
| ENSG0000( Transcript | ENST0000C protein_co -     | 13/18 | ENST0000C - -             |
| ENSG0000( Transcript | ENST0000C protein_co 18/19 | -     | ENST0000C ENSP0000C 2737  |
| ENSG0000( Transcript | ENST0000C protein_co 23/29 | -     | ENST0000C ENSP0000C 4132  |
| ENSG0000( Transcript | ENST0000C protein_co 23/23 | -     | ENST0000C ENSP0000C 3077  |
| ENSG0000( Transcript | ENST0000C protein_co 3/23  | -     | ENST0000C ENSP0000C 510   |
| ENSG0000( Transcript | ENST0000C protein_co -     | 21/22 | ENST0000C - -             |
| ENSG0000( Transcript | ENST0000C protein_co -     | 7/22  | ENST0000C - -             |
| ENSG0000( Transcript | ENST0000C protein_co -     | 3/22  | ENST0000C - -             |
| ENSG0000( Transcript | ENST0000C protein_co 1/23  | -     | ENST0000C - 93            |
| ENSG0000( Transcript | ENST0000C protein_co 73/84 | -     | ENST0000C ENSP0000C 14043 |
| ENSG0000( Transcript | ENST0000C protein_co 70/84 | -     | ENST0000C ENSP0000C 13689 |
| ENSG0000( Transcript | ENST0000C protein_co 69/84 | -     | ENST0000C ENSP0000C 13498 |
| ENSG0000( Transcript | ENST0000C protein_co 42/84 | -     | ENST0000C ENSP0000C 8781  |
| ENSG0000( Transcript | ENST0000C protein_co 42/84 | -     | ENST0000C ENSP0000C 8481  |
| ENSG0000( Transcript | ENST0000C protein_co -     | 22/83 | ENST0000C - -             |
| ENSG0000( Transcript | ENST0000C protein_co -     | 22/83 | ENST0000C - -             |
| ENSG0000( Transcript | ENST0000C protein_co -     | 21/83 | ENST0000C - -             |
| ENSG0000( Transcript | ENST0000C protein_co -     | 11/30 | ENST0000C - -             |
| ENSG0000( Transcript | ENST0000C protein_co -     | 16/30 | ENST0000C - -             |
| ENSG0000( Transcript | ENST0000C protein_co 4/53  | -     | ENST0000C ENSP0000C 1652  |
| ENSG0000( Transcript | ENST0000C protein_co 14/53 | -     | ENST0000C ENSP0000C 3188  |
| ENSG0000( Transcript | ENST0000C protein_co 17/53 | -     | ENST0000C ENSP0000C 3622  |
| ENSG0000( Transcript | ENST0000C protein_co -     | 36/52 | ENST0000C - -             |
| ENSG0000( Transcript | ENST0000C protein_co 41/53 | -     | ENST0000C ENSP0000C 7479  |
| ENSG0000( Transcript | ENST0000C protein_co 53/53 | -     | ENST0000C ENSP0000C 9332  |
| ENSG0000( Transcript | ENST0000C protein_co -     | 6/16  | ENST0000C - -             |
| ENSG0000( Transcript | ENST0000C protein_co -     | 9/16  | ENST0000C - -             |
| ENSG0000( Transcript | ENST0000C protein_co 10/17 | -     | ENST0000C ENSP0000C 1991  |
| ENSG0000( Transcript | ENST0000C protein_co -     | 10/16 | ENST0000C - -             |
| ENSG0000( Transcript | ENST0000C protein_co -     | 9/16  | ENST0000C - -             |
| ENSG0000( Transcript | ENST0000C protein_co -     | 1/16  | ENST0000C - -             |
| ENSG0000( Transcript | ENST0000C protein_co 9/16  | -     | ENST0000C ENSP0000C 2119  |
| ENSG0000( Transcript | ENST0000C protein_co -     | 8/26  | ENST0000C - -             |
| ENSG0000( Transcript | ENST0000C protein_co -     | 9/26  | ENST0000C - -             |
| ENSG0000( Transcript | ENST0000C protein_co 26/27 | -     | ENST0000C ENSP0000C 3451  |
| ENSG0000( Transcript | ENST0000C protein_co -     | 3/27  | ENST0000C - -             |
| ENSG0000( Transcript | ENST0000C protein_co 28/28 | -     | ENST0000C ENSP0000C 3944  |
| ENSG0000( Transcript | ENST0000C protein_co -     | 17/27 | ENST0000C - -             |
| ENSG0000( Transcript | ENST0000C protein_co -     | 2/27  | ENST0000C - -             |
| ENSG0000( Transcript | ENST0000C protein_co 4/12  | -     | ENST0000C ENSP0000C 300   |
| ENSG0000( Transcript | ENST0000C protein_co -     | 9/13  | ENST0000C - -             |
| ENSG0000( Transcript | ENST0000C protein_co 7/13  | -     | ENST0000C ENSP0000C 809   |
| ENSG0000( Transcript | ENST0000C protein_co 8/11  | -     | ENST0000C ENSP0000C 2494  |

|            |            |            |                   |       |            |            |           |
|------------|------------|------------|-------------------|-------|------------|------------|-----------|
| ENSG000001 | Transcript | ENST000001 | protein_co 1/11   | -     | ENST000001 | ENSP000001 | 1662      |
| ENSG000001 | Transcript | ENST000001 | protein_co -      | 10/13 | ENST000001 | -          | -         |
| ENSG000001 | Transcript | ENST000001 | protein_co -      | 8/19  | ENST000001 | -          | -         |
| ENSG000001 | Transcript | ENST000001 | protein_co 2/2    | -     | ENST000001 | ENSP000001 | 1800-1801 |
| ENSG000001 | Transcript | ENST000001 | protein_co -      | 14/42 | ENST000001 | -          | -         |
| ENSG000001 | Transcript | ENST000001 | protein_co -      | 4/42  | ENST000001 | -          | -         |
| ENSG000001 | Transcript | ENST000001 | protein_co 15/43  | -     | ENST000001 | ENSP000001 | 1259      |
| ENSG000001 | Transcript | ENST000001 | protein_co 37/43  | -     | ENST000001 | ENSP000001 | 3832      |
| ENSG000001 | Transcript | ENST000001 | protein_co -      | 58/63 | ENST000001 | -          | -         |
| ENSG000001 | Transcript | ENST000001 | protein_co 12/12  | -     | ENST000001 | ENSP000001 | 3310      |
| ENSG000001 | Transcript | ENST000001 | protein_co 15/19  | -     | ENST000001 | ENSP000001 | 2333      |
| ENSG000001 | Transcript | ENST000001 | protein_co 15/18  | -     | ENST000001 | ENSP000001 | 2634      |
| ENSG000001 | Transcript | ENST000001 | protein_co -      | 5/17  | ENST000001 | -          | -         |
| ENSG000001 | Transcript | ENST000001 | protein_co 13/18  | -     | ENST000001 | ENSP000001 | 1976      |
| ENSG000001 | Transcript | ENST000001 | protein_co 10/18  | -     | ENST000001 | ENSP000001 | 1553      |
| ENSG000001 | Transcript | ENST000001 | protein_co -      | 19/23 | ENST000001 | -          | -         |
| ENSG000001 | Transcript | ENST000001 | protein_co 29/30  | -     | ENST000001 | ENSP000001 | 3945      |
| ENSG000001 | Transcript | ENST000001 | protein_co -      | 42/45 | ENST000001 | -          | -         |
| ENSG000001 | Transcript | ENST000001 | protein_co 40/46  | -     | ENST000001 | ENSP000001 | 6632      |
| ENSG000001 | Transcript | ENST000001 | protein_co -      | 16/45 | ENST000001 | -          | -         |
| ENSG000001 | Transcript | ENST000001 | protein_co 2/3    | -     | ENST000001 | ENSP000001 | 1173      |
| ENSG000001 | Transcript | ENST000001 | protein_co 2/3    | -     | ENST000001 | ENSP000001 | 1565      |
| ENSG000001 | Transcript | ENST000001 | protein_co 16-Jan | -     | ENST000001 | ENSP000001 | 280-281   |
| ENSG000001 | Transcript | ENST000001 | protein_co 13/17  | -     | ENST000001 | ENSP000001 | 1984      |
| ENSG000001 | Transcript | ENST000001 | protein_co -      | 8/12  | ENST000001 | -          | -         |
| ENSG000001 | Transcript | ENST000001 | protein_co 4/6    | -     | ENST000001 | ENSP000001 | 1292      |
| ENSG000001 | Transcript | ENST000001 | protein_co 1/13   | -     | ENST000001 | ENSP000001 | 669       |
| ENSG000001 | Transcript | ENST000001 | protein_co -      | 10/18 | ENST000001 | -          | -         |
| ENSG000001 | Transcript | ENST000001 | protein_co 18/33  | -     | ENST000001 | ENSP000001 | 3158      |
| ENSG000001 | Transcript | ENST000001 | protein_co 8/9    | -     | ENST000001 | ENSP000001 | 2424      |
| ENSG000001 | Transcript | ENST000001 | protein_co -      | 20/21 | ENST000001 | -          | -         |
| ENSG000001 | Transcript | ENST000001 | protein_co 12/12  | -     | ENST000001 | ENSP000001 | 2808      |
| ENSG000001 | Transcript | ENST000001 | protein_co -      | 10/11 | ENST000001 | -          | -         |
| ENSG000001 | Transcript | ENST000001 | protein_co 9/11   | -     | ENST000001 | ENSP000001 | 1282      |
| ENSG000001 | Transcript | ENST000001 | protein_co -      | 1/20  | ENST000001 | -          | -         |
| ENSG000001 | Transcript | ENST000001 | protein_co -      | 10/20 | ENST000001 | -          | -         |
| ENSG000001 | Transcript | ENST000001 | protein_co -      | 1/47  | ENST000001 | -          | -         |
| ENSG000001 | Transcript | ENST000001 | protein_co 31/48  | -     | ENST000001 | ENSP000001 | 4587      |
| ENSG000001 | Transcript | ENST000001 | protein_co -      | 12/21 | ENST000001 | -          | -         |
| ENSG000001 | Transcript | ENST000001 | protein_co -      | 3/21  | ENST000001 | -          | -         |
| ENSG000001 | Transcript | ENST000001 | protein_co 17/17  | -     | ENST000001 | ENSP000001 | 2888      |
| ENSG000001 | Transcript | ENST000001 | protein_co 17/17  | -     | ENST000001 | ENSP000001 | 2384      |
| ENSG000001 | Transcript | ENST000001 | protein_co -      | 14/16 | ENST000001 | -          | -         |
| ENSG000001 | Transcript | ENST000001 | protein_co 8/17   | -     | ENST000001 | ENSP000001 | 1175      |
| ENSG000001 | Transcript | ENST000001 | protein_co -      | 4/16  | ENST000001 | -          | -         |
| ENSG000001 | Transcript | ENST000001 | protein_co 5/9    | -     | ENST000001 | ENSP000001 | 666       |
| ENSG000001 | Transcript | ENST000001 | protein_co 1/2    | -     | ENST000001 | ENSP000001 | 4076      |

|                      |                             |       |                               |
|----------------------|-----------------------------|-------|-------------------------------|
| ENSG0000( Transcript | ENST0000C protein_co 4/30   | -     | ENST0000C ENSP0000C 515       |
| ENSG0000( Transcript | ENST0000C protein_co -      | 4/29  | ENST0000C - -                 |
| ENSG0000( Transcript | ENST0000C protein_co 7/30   | -     | ENST0000C ENSP0000C 846       |
| ENSG0000( Transcript | ENST0000C protein_co 13/30  | -     | ENST0000C ENSP0000C 1715      |
| ENSG0000( Transcript | ENST0000C protein_co -      | 12/27 | ENST0000C - -                 |
| ENSG0000( Transcript | ENST0000C protein_co -      | 22/27 | ENST0000C - -                 |
| ENSG0000( Transcript | ENST0000C protein_co -      | 4/16  | ENST0000C - -                 |
| ENSG0000( Transcript | ENST0000C protein_co 3/15   | -     | ENST0000C ENSP0000C 327       |
| ENSG0000( Transcript | ENST0000C protein_co -      | 3/14  | ENST0000C - -                 |
| ENSG0000( Transcript | ENST0000C protein_co 12/15  | -     | ENST0000C ENSP0000C 1943      |
| ENSG0000( Transcript | ENST0000C protein_co 12/15  | -     | ENST0000C ENSP0000C 1967      |
| ENSG0000( Transcript | ENST0000C protein_co 19/25  | -     | ENST0000C ENSP0000C 2982-2983 |
| ENSG0000( Transcript | ENST0000C protein_co -      | 20/24 | ENST0000C - -                 |
| ENSG0000( Transcript | ENST0000C protein_co 18/18  | -     | ENST0000C ENSP0000C 5241-5242 |
| ENSG0000( Transcript | ENST0000C protein_co 18-Aug | -     | ENST0000C ENSP0000C 1810      |
| ENSG0000( Transcript | ENST0000C protein_co 8/18   | -     | ENST0000C ENSP0000C 2398      |
| ENSG0000( Transcript | ENST0000C protein_co 12/18  | -     | ENST0000C ENSP0000C 2979      |
| ENSG0000( Transcript | ENST0000C protein_co 12/18  | -     | ENST0000C ENSP0000C 2983      |
| ENSG0000( Transcript | ENST0000C protein_co 12/18  | -     | ENST0000C ENSP0000C 2990      |
| ENSG0000( Transcript | ENST0000C protein_co 7/26   | -     | ENST0000C ENSP0000C 1414      |
| ENSG0000( Transcript | ENST0000C protein_co -      | 23/28 | ENST0000C - -                 |
| ENSG0000( Transcript | ENST0000C protein_co -      | 27/29 | ENST0000C - -                 |
| ENSG0000( Transcript | ENST0000C protein_co 13/30  | -     | ENST0000C ENSP0000C 2185      |
| ENSG0000( Transcript | ENST0000C protein_co 6/30   | -     | ENST0000C ENSP0000C 1094      |
| ENSG0000( Transcript | ENST0000C protein_co 4/30   | -     | ENST0000C ENSP0000C 724-725   |
| ENSG0000( Transcript | ENST0000C protein_co 4/6    | -     | ENST0000C ENSP0000C 1881      |
| ENSG0000( Transcript | ENST0000C protein_co 2/4    | -     | ENST0000C ENSP0000C 500       |
| ENSG0000( Transcript | ENST0000C protein_co 2/6    | -     | ENST0000C ENSP0000C 104-105   |
| ENSG0000( Transcript | ENST0000C protein_co 20/20  | -     | ENST0000C ENSP0000C 3275      |
| ENSG0000( Transcript | ENST0000C protein_co -      | 19/19 | ENST0000C - -                 |
| ENSG0000( Transcript | ENST0000C protein_co -      | 16/19 | ENST0000C - -                 |
| ENSG0000( Transcript | ENST0000C protein_co -      | 11/19 | ENST0000C - -                 |
| ENSG0000( Transcript | ENST0000C protein_co 11/20  | -     | ENST0000C ENSP0000C 1680      |
| ENSG0000( Transcript | ENST0000C protein_co 7/25   | -     | ENST0000C ENSP0000C 1351      |
| ENSG0000( Transcript | ENST0000C protein_co 22/25  | -     | ENST0000C ENSP0000C 3705      |
| ENSG0000( Transcript | ENST0000C protein_co -      | 82/90 | ENST0000C - -                 |
| ENSG0000( Transcript | ENST0000C protein_co -      | 64/90 | ENST0000C - -                 |
| ENSG0000( Transcript | ENST0000C protein_co 62/91  | -     | ENST0000C ENSP0000C 10890     |
| ENSG0000( Transcript | ENST0000C protein_co -      | 59/90 | ENST0000C - -                 |
| ENSG0000( Transcript | ENST0000C protein_co 44/91  | -     | ENST0000C ENSP0000C 8357      |
| ENSG0000( Transcript | ENST0000C protein_co 30/91  | -     | ENST0000C ENSP0000C 5981      |
| ENSG0000( Transcript | ENST0000C protein_co -      | 28/90 | ENST0000C - -                 |
| ENSG0000( Transcript | ENST0000C protein_co 21/91  | -     | ENST0000C ENSP0000C 4180      |
| ENSG0000( Transcript | ENST0000C protein_co 8/91   | -     | ENST0000C ENSP0000C 2085      |
| ENSG0000( Transcript | ENST0000C protein_co -      | 6/90  | ENST0000C - -                 |
| ENSG0000( Transcript | ENST0000C protein_co -      | 4/90  | ENST0000C - -                 |
| ENSG0000( Transcript | ENST0000C protein_co -      | 1/90  | ENST0000C - -                 |

|                      |                            |        |                               |        |
|----------------------|----------------------------|--------|-------------------------------|--------|
| ENSG0000( Transcript | ENST0000C protein_co -     | 1/16   | ENST0000C -                   | -      |
| ENSG0000( Transcript | ENST0000C protein_co 14/23 | -      | ENST0000C ENSP0000C 2307      |        |
| ENSG0000( Transcript | ENST0000C protein_co 3/5   | -      | ENST0000C ENSP0000C 3467      |        |
| ENSG0000( Transcript | ENST0000C protein_co 2/5   | -      | ENST0000C ENSP0000C 2254      |        |
| ENSG0000( Transcript | ENST0000C protein_co 2/5   | -      | ENST0000C ENSP0000C 2090      |        |
| ENSG0000( Transcript | ENST0000C protein_co 10/11 | -      | ENST0000C ENSP0000C 1571      |        |
| ENSG0000( Transcript | ENST0000C protein_co -     | 11/17  | ENST0000C -                   | -      |
| ENSG0000( Transcript | ENST0000C protein_co 17/17 | -      | ENST0000C ENSP0000C 2517      |        |
| ENSG0000( Transcript | ENST0000C protein_co -     | -      | -                             | -      |
| ENSG0000( Transcript | ENST0000C protein_co -     | 10/15  | ENST0000C -                   | -      |
| ENSG0000( Transcript | ENST0000C protein_co 2/3   | -      | ENST0000C ENSP0000C 994       |        |
| ENSG0000( Transcript | ENST0000C protein_co 10/10 | -      | ENST0000C ENSP0000C 2085      |        |
| ENSG0000( Transcript | ENST0000C protein_co 2/21  | -      | ENST0000C ENSP0000C 916       |        |
| ENSG0000( Transcript | ENST0000C protein_co 8/21  | -      | ENST0000C ENSP0000C 2178      |        |
| ENSG0000( Transcript | ENST0000C protein_co -     | 2/9    | ENST0000C -                   | -      |
| ENSG0000( Transcript | ENST0000C protein_co -     | 6/9    | ENST0000C -                   | -      |
| ENSG0000( Transcript | ENST0000C protein_co 17/19 | -      | ENST0000C ENSP0000C 2152      |        |
| ENSG0000( Transcript | ENST0000C protein_co 27/36 | -      | ENST0000C ENSP0000C 9594      |        |
| ENSG0000( Transcript | ENST0000C protein_co 32/36 | -      | ENST0000C ENSP0000C 11328     |        |
| ENSG0000( Transcript | ENST0000C protein_co -     | 32/53  | ENST0000C -                   | -      |
| ENSG0000( Transcript | ENST0000C protein_co 43/59 | -      | ENST0000C ENSP0000C 11226     |        |
| ENSG0000( Transcript | ENST0000C protein_co 36/59 | -      | ENST0000C ENSP0000C 5920      |        |
| ENSG0000( Transcript | ENST0000C protein_co -     | 25/58  | ENST0000C -                   | -      |
| ENSG0000( Transcript | ENST0000C protein_co -     | 25/58  | ENST0000C -                   | -      |
| ENSG0000( Transcript | ENST0000C protein_co -     | 25/58  | ENST0000C -                   | -      |
| ENSG0000( Transcript | ENST0000C protein_co 12/59 | -      | ENST0000C ENSP0000C 1951      |        |
| ENSG0000( Transcript | ENST0000C protein_co -     | 6/58   | ENST0000C -                   | -      |
| ENSG0000( Transcript | ENST0000C protein_co -     | 22-May | ENST0000C -                   | -      |
| ENSG0000( Transcript | ENST0000C protein_co -     | 5/22   | ENST0000C -                   | -      |
| ENSG0000( Transcript | ENST0000C protein_co -     | 18/22  | ENST0000C -                   | -      |
| ENSG0000( Transcript | ENST0000C protein_co 1/12  | -      | ENST0000C -                   | 25     |
| ENSG0000( Transcript | ENST0000C protein_co -     | -      | -                             | -      |
| ENSG0000( Transcript | ENST0000C protein_co 3/20  | -      | ENST0000C ENSP0000C 349       |        |
| ENSG0000( Transcript | ENST0000C protein_co 4/16  | -      | ENST0000C ENSP0000C 902       |        |
| ENSG0000( Transcript | ENST0000C protein_co -     | 5/15   | ENST0000C -                   | -      |
| ENSG0000( Transcript | ENST0000C protein_co 6/16  | -      | ENST0000C ENSP0000C 1233      |        |
| ENSG0000( Transcript | ENST0000C protein_co 14/16 | -      | ENST0000C ENSP0000C 2483-2488 |        |
| ENSG0000( Transcript | ENST0000C protein_co 58/58 | -      | ENST0000C -                   | 7767   |
| ENSG0000( Transcript | ENST0000C protein_co 2/33  | -      | ENST0000C ENSP0000C 522-523   |        |
| ENSG0000( Transcript | ENST0000C protein_co -     | 17/32  | ENST0000C -                   | -      |
| ENSG0000( Transcript | ENST0000C protein_co -     | 23/32  | ENST0000C -                   | -      |
| ENSG0000( Transcript | ENST0000C protein_co 31/33 | -      | ENST0000C ENSP0000C 3861      |        |
| ENSG0000( Transcript | ENST0000C protein_co 6/8   | 5/7    | ENST0000C -                   | ?-1154 |
| ENSG0000( Transcript | ENST0000C protein_co 3/8   | -      | ENST0000C ENSP0000C 831       |        |
| ENSG0000( Transcript | ENST0000C protein_co 3/16  | -      | ENST0000C ENSP0000C 377       |        |
| ENSG0000( Transcript | ENST0000C protein_co 3/3   | -      | ENST0000C ENSP0000C 1671-1672 |        |
| ENSG0000( Transcript | ENST0000C protein_co 3/3   | -      | ENST0000C -                   | 1931   |

|                       |                             |       |                                 |
|-----------------------|-----------------------------|-------|---------------------------------|
| ENSG000001 Transcript | ENST000001 protein_co 3/3   | -     | ENST000001 ENSP000001 749       |
| ENSG000001 Transcript | ENST000001 protein_co 3/3   | -     | ENST000001 ENSP000001 1521      |
| ENSG000001 Transcript | ENST000001 protein_co 41/42 | -     | ENST000001 ENSP000001 5796      |
| ENSG000001 Transcript | ENST000001 protein_co -     | 27/41 | ENST000001 - -                  |
| ENSG000001 Transcript | ENST000001 protein_co -     | 28/40 | ENST000001 - -                  |
| ENSG000001 Transcript | ENST000001 protein_co 17/23 | -     | ENST000001 ENSP000001 3704      |
| ENSG000001 Transcript | ENST000001 protein_co 17/23 | -     | ENST000001 ENSP000001 3520      |
| ENSG000001 Transcript | ENST000001 protein_co -     | 8/22  | ENST000001 - -                  |
| ENSG000001 Transcript | ENST000001 protein_co 8/23  | -     | ENST000001 ENSP000001 935       |
| ENSG000001 Transcript | ENST000001 protein_co 3/23  | -     | ENST000001 ENSP000001 246       |
| ENSG000001 Transcript | ENST000001 protein_co 9/12  | -     | ENST000001 ENSP000001 1309      |
| ENSG000001 Transcript | ENST000001 protein_co -     | 10/11 | ENST000001 - -                  |
| ENSG000001 Transcript | ENST000001 protein_co -     | 9/57  | ENST000001 - -                  |
| ENSG000001 Transcript | ENST000001 protein_co -     | 29/57 | ENST000001 - -                  |
| ENSG000001 Transcript | ENST000001 protein_co 53/58 | -     | ENST000001 ENSP000001 8160      |
| ENSG000001 Transcript | ENST000001 protein_co 5/5   | -     | ENST000001 ENSP000001 1633      |
| ENSG000001 Transcript | ENST000001 protein_co 21/24 | -     | ENST000001 ENSP000001 2861      |
| ENSG000001 Transcript | ENST000001 protein_co -     | 21/23 | ENST000001 - -                  |
| ENSG000001 Transcript | ENST000001 protein_co 22/24 | -     | ENST000001 ENSP000001 2952      |
| ENSG000001 Transcript | ENST000001 protein_co 24/24 | -     | ENST000001 ENSP000001 3367      |
| ENSG000001 Transcript | ENST000001 protein_co -     | 3/22  | ENST000001 - -                  |
| ENSG000001 Transcript | ENST000001 protein_co 20/30 | -     | ENST000001 ENSP000001 4890      |
| ENSG000001 Transcript | ENST000001 protein_co 18/30 | -     | ENST000001 ENSP000001 2619      |
| ENSG000001 Transcript | ENST000001 protein_co 1/17  | -     | ENST000001 ENSP000001 74        |
| ENSG000001 Transcript | ENST000001 protein_co -     | 22/33 | ENST000001 - -                  |
| ENSG000001 Transcript | ENST000001 protein_co 4/34  | -     | ENST000001 ENSP000001 936       |
| ENSG000001 Transcript | ENST000001 protein_co 29/30 | -     | ENST000001 ENSP000001 5431      |
| ENSG000001 Transcript | ENST000001 protein_co 24/30 | -     | ENST000001 ENSP000001 4643      |
| ENSG000001 Transcript | ENST000001 protein_co 5/23  | -     | ENST000001 ENSP000001 1849      |
| ENSG000001 Transcript | ENST000001 protein_co 19/22 | -     | ENST000001 ENSP000001 3713      |
| ENSG000001 Transcript | ENST000001 protein_co 7/17  | -     | ENST000001 ENSP000001 840       |
| ENSG000001 Transcript | ENST000001 protein_co 12/19 | -     | ENST000001 ENSP000001 1487      |
| ENSG000001 Transcript | ENST000001 protein_co 31/36 | -     | ENST000001 ENSP000001 5814      |
| ENSG000001 Transcript | ENST000001 protein_co -     | 6/32  | ENST000001 - -                  |
| ENSG000001 Transcript | ENST000001 protein_co -     | 15/15 | ENST000001 - -                  |
| ENSG000001 Transcript | ENST000001 protein_co -     | 3/9   | ENST000001 - -                  |
| ENSG000001 Transcript | ENST000001 protein_co 5/8   | -     | ENST000001 ENSP000001 1359      |
| ENSG000001 Transcript | ENST000001 protein_co 23/30 | -     | ENST000001 ENSP000001 3671      |
| ENSG000001 Transcript | ENST000001 protein_co 23/30 | -     | ENST000001 ENSP000001 3654      |
| ENSG000001 Transcript | ENST000001 protein_co 44/44 | -     | ENST000001 - 7419               |
| ENSG000001 Transcript | ENST000001 protein_co 38/44 | -     | ENST000001 ENSP000001 6446      |
| ENSG000001 Transcript | ENST000001 protein_co 37/44 | -     | ENST000001 ENSP000001 6334      |
| ENSG000001 Transcript | ENST000001 protein_co 37/44 | -     | ENST000001 ENSP000001 6328      |
| ENSG000001 Transcript | ENST000001 protein_co 37/44 | -     | ENST000001 ENSP000001 6310      |
| ENSG000001 Transcript | ENST000001 protein_co 37/44 | -     | ENST000001 ENSP000001 6305-6306 |
| ENSG000001 Transcript | ENST000001 protein_co 34/44 | -     | ENST000001 ENSP000001 5873      |
| ENSG000001 Transcript | ENST000001 protein_co 34/44 | -     | ENST000001 ENSP000001 5860      |

|            |            |            |            |       |       |            |            |       |
|------------|------------|------------|------------|-------|-------|------------|------------|-------|
| ENSG000001 | Transcript | ENST000001 | protein_co | 27/44 | -     | ENST000001 | ENSP000001 | 4687  |
| ENSG000001 | Transcript | ENST000001 | protein_co | 27/44 | -     | ENST000001 | ENSP000001 | 4655  |
| ENSG000001 | Transcript | ENST000001 | protein_co | 25/44 | -     | ENST000001 | ENSP000001 | 4024  |
| ENSG000001 | Transcript | ENST000001 | protein_co | 25/44 | -     | ENST000001 | ENSP000001 | 3940  |
| ENSG000001 | Transcript | ENST000001 | protein_co | -     | 23/43 | ENST000001 | -          | -     |
| ENSG000001 | Transcript | ENST000001 | protein_co | 23/44 | -     | ENST000001 | ENSP000001 | 3258  |
| ENSG000001 | Transcript | ENST000001 | protein_co | 6/44  | -     | ENST000001 | ENSP000001 | 1037  |
| ENSG000001 | Transcript | ENST000001 | protein_co | -     | 5/43  | ENST000001 | -          | -     |
| ENSG000001 | Transcript | ENST000001 | protein_co | -     | 5/43  | ENST000001 | -          | -     |
| ENSG000001 | Transcript | ENST000001 | protein_co | -     | 5/43  | ENST000001 | -          | -     |
| ENSG000001 | Transcript | ENST000001 | protein_co | 1/44  | -     | ENST000001 | ENSP000001 | 406   |
| ENSG000001 | Transcript | ENST000001 | protein_co | 1/44  | -     | ENST000001 | ENSP000001 | 353   |
| ENSG000001 | Transcript | ENST000001 | protein_co | 1/44  | -     | ENST000001 | ENSP000001 | 329   |
| ENSG000001 | Transcript | ENST000001 | protein_co | 4/23  | -     | ENST000001 | ENSP000001 | 757   |
| ENSG000001 | Transcript | ENST000001 | protein_co | 4/23  | -     | ENST000001 | ENSP000001 | 759   |
| ENSG000001 | Transcript | ENST000001 | protein_co | -     | 19/22 | ENST000001 | -          | -     |
| ENSG000001 | Transcript | ENST000001 | protein_co | 4/23  | -     | ENST000001 | ENSP000001 | 990   |
| ENSG000001 | Transcript | ENST000001 | protein_co | -     | 21/22 | ENST000001 | -          | -     |
| ENSG000001 | Transcript | ENST000001 | protein_co | 3/34  | -     | ENST000001 | ENSP000001 | 594   |
| ENSG000001 | Transcript | ENST000001 | protein_co | -     | 2/20  | ENST000001 | -          | -     |
| ENSG000001 | Transcript | ENST000001 | protein_co | -     | 5/20  | ENST000001 | -          | -     |
| ENSG000001 | Transcript | ENST000001 | protein_co | 4/23  | -     | ENST000001 | ENSP000001 | 571   |
| ENSG000001 | Transcript | ENST000001 | protein_co | -     | 10/10 | ENST000001 | -          | -     |
| ENSG000001 | Transcript | ENST000001 | protein_co | 2/16  | -     | ENST000001 | ENSP000001 | 839   |
| ENSG000001 | Transcript | ENST000001 | protein_co | 12/16 | -     | ENST000001 | ENSP000001 | 2174  |
| ENSG000001 | Transcript | ENST000001 | protein_co | 61/67 | -     | ENST000001 | ENSP000001 | 10547 |
| ENSG000001 | Transcript | ENST000001 | protein_co | 58/67 | -     | ENST000001 | ENSP000001 | 9632  |
| ENSG000001 | Transcript | ENST000001 | protein_co | 32/67 | -     | ENST000001 | ENSP000001 | 5425  |
| ENSG000001 | Transcript | ENST000001 | protein_co | 32/67 | -     | ENST000001 | ENSP000001 | 4386  |
| ENSG000001 | Transcript | ENST000001 | protein_co | -     | 16/66 | ENST000001 | -          | -     |
| ENSG000001 | Transcript | ENST000001 | protein_co | 16/67 | -     | ENST000001 | ENSP000001 | 1783  |
| ENSG000001 | Transcript | ENST000001 | protein_co | 9/13  | -     | ENST000001 | ENSP000001 | 1568  |
| ENSG000001 | Transcript | ENST000001 | protein_co | 9/13  | -     | ENST000001 | ENSP000001 | 2023  |
| ENSG000001 | Transcript | ENST000001 | protein_co | 11/15 | -     | ENST000001 | ENSP000001 | 1462  |
| ENSG000001 | Transcript | ENST000001 | protein_co | 10/15 | -     | ENST000001 | ENSP000001 | 1170  |
| ENSG000001 | Transcript | ENST000001 | protein_co | -     | 8/14  | ENST000001 | -          | -     |
| ENSG000001 | Transcript | ENST000001 | protein_co | -     | 14/18 | ENST000001 | -          | -     |
| ENSG000001 | Transcript | ENST000001 | protein_co | -     | 1/10  | ENST000001 | -          | -     |
| ENSG000001 | Transcript | ENST000001 | protein_co | 87/87 | -     | ENST000001 | ENSP000001 | 12246 |
| ENSG000001 | Transcript | ENST000001 | protein_co | 65/87 | -     | ENST000001 | ENSP000001 | 8896  |
| ENSG000001 | Transcript | ENST000001 | protein_co | 43/87 | -     | ENST000001 | ENSP000001 | 5718  |
| ENSG000001 | Transcript | ENST000001 | protein_co | 25/87 | -     | ENST000001 | ENSP000001 | 2940  |
| ENSG000001 | Transcript | ENST000001 | protein_co | -     | 22/86 | ENST000001 | -          | -     |
| ENSG000001 | Transcript | ENST000001 | protein_co | 21/24 | -     | ENST000001 | ENSP000001 | 3761  |
| ENSG000001 | Transcript | ENST000001 | protein_co | -     | 8/23  | ENST000001 | -          | -     |
| ENSG000001 | Transcript | ENST000001 | protein_co | -     | 4/9   | ENST000001 | -          | -     |
| ENSG000001 | Transcript | ENST000001 | protein_co | -     | 3/9   | ENST000001 | -          | -     |

|            |            |            |                    |       |            |            |             |
|------------|------------|------------|--------------------|-------|------------|------------|-------------|
| ENSG000001 | Transcript | ENST000001 | protein_co 7/16    | -     | ENST000001 | ENSP000001 | 1012-1013   |
| ENSG000001 | Transcript | ENST000001 | protein_co -       | 29/42 | ENST000001 | -          | -           |
| ENSG000001 | Transcript | ENST000001 | protein_co 25/43   | -     | ENST000001 | ENSP000001 | 3457        |
| ENSG000001 | Transcript | ENST000001 | protein_co 25/43   | -     | ENST000001 | ENSP000001 | 3377        |
| ENSG000001 | Transcript | ENST000001 | protein_co -       | 22/30 | ENST000001 | -          | -           |
| ENSG000001 | Transcript | ENST000001 | protein_co 8/25    | -     | ENST000001 | ENSP000001 | 1505        |
| ENSG000001 | Transcript | ENST000001 | protein_co 16/17   | -     | ENST000001 | ENSP000001 | 2189        |
| ENSG000001 | Transcript | ENST000001 | protein_co 15/17   | -     | ENST000001 | ENSP000001 | 1992        |
| ENSG000001 | Transcript | ENST000001 | protein_co -       | 9/16  | ENST000001 | -          | -           |
| ENSG000001 | Transcript | ENST000001 | protein_co 9/18    | -     | ENST000001 | ENSP000001 | 1605        |
| ENSG000001 | Transcript | ENST000001 | protein_co -       | 3/8   | ENST000001 | -          | -           |
| ENSG000001 | Transcript | ENST000001 | protein_co -       | -     | -          | -          | -           |
| ENSG000001 | Transcript | ENST000001 | protein_co 10/11   | -     | ENST000001 | ENSP000001 | 1401        |
| ENSG000001 | Transcript | ENST000001 | protein_co 10/11   | -     | ENST000001 | ENSP000001 | 1405        |
| ENSG000001 | Transcript | ENST000001 | protein_co -       | 1/6   | ENST000001 | -          | -           |
| ENSG000001 | Transcript | ENST000001 | protein_co -       | 4/6   | ENST000001 | -          | -           |
| ENSG000001 | Transcript | ENST000001 | protein_co 4/68    | -     | ENST000001 | ENSP000001 | 848         |
| ENSG000001 | Transcript | ENST000001 | protein_co -       | 6/67  | ENST000001 | -          | -           |
| ENSG000001 | Transcript | ENST000001 | protein_co 9/68    | -     | ENST000001 | ENSP000001 | 1813        |
| ENSG000001 | Transcript | ENST000001 | protein_co 29/68   | -     | ENST000001 | ENSP000001 | 7110        |
| ENSG000001 | Transcript | ENST000001 | protein_co -       | 54/67 | ENST000001 | -          | -           |
| ENSG000001 | Transcript | ENST000001 | protein_co 59/68   | -     | ENST000001 | ENSP000001 | 14254-14257 |
| ENSG000001 | Transcript | ENST000001 | protein_co 12/43   | -     | ENST000001 | ENSP000001 | 1813        |
| ENSG000001 | Transcript | ENST000001 | protein_co -       | 3/21  | ENST000001 | -          | -           |
| ENSG000001 | Transcript | ENST000001 | protein_co 11/11   | -     | ENST000001 | ENSP000001 | 1661        |
| ENSG000001 | Transcript | ENST000001 | protein_co 3/11    | -     | ENST000001 | ENSP000001 | 364         |
| ENSG000001 | Transcript | ENST000001 | protein_co 2/11    | -     | ENST000001 | ENSP000001 | 244         |
| ENSG000001 | Transcript | ENST000001 | protein_co -       | 7/14  | ENST000001 | -          | -           |
| ENSG000001 | Transcript | ENST000001 | protein_co 5/21    | -     | ENST000001 | ENSP000001 | 4637        |
| ENSG000001 | Transcript | ENST000001 | protein_co 3/21    | -     | ENST000001 | ENSP000001 | 2175        |
| ENSG000001 | Transcript | ENST000001 | protein_co 22/25   | -     | ENST000001 | ENSP000001 | 3347        |
| ENSG000001 | Transcript | ENST000001 | protein_co -       | 3/13  | ENST000001 | -          | -           |
| ENSG000001 | Transcript | ENST000001 | protein_co 3/14    | -     | ENST000001 | ENSP000001 | 929         |
| ENSG000001 | Transcript | ENST000001 | protein_co 3/12    | -     | ENST000001 | ENSP000001 | 936         |
| ENSG000001 | Transcript | ENST000001 | protein_co 10/12   | -     | ENST000001 | ENSP000001 | 1729        |
| ENSG000001 | Transcript | ENST000001 | protein_co 34/36   | -     | ENST000001 | ENSP000001 | 4988        |
| ENSG000001 | Transcript | ENST000001 | protein_co -       | 5/8   | ENST000001 | -          | -           |
| ENSG000001 | Transcript | ENST000001 | protein_co -       | 7/8   | ENST000001 | -          | -           |
| ENSG000001 | Transcript | ENST000001 | protein_co 1/1     | -     | ENST000001 | ENSP000001 | 1017-1018   |
| ENSG000001 | Transcript | ENST000001 | protein_co 1/1     | -     | ENST000001 | ENSP000001 | 1155        |
| ENSG000001 | Transcript | ENST000001 | protein_co -       | 13/13 | ENST000001 | -          | -           |
| ENSG000001 | Transcript | ENST000001 | protein_co 14/14   | -     | ENST000001 | ENSP000001 | 1945        |
| ENSG000001 | Transcript | ENST000001 | protein_co 9/27    | -     | ENST000001 | ENSP000001 | 1412        |
| ENSG000001 | Transcript | ENST000001 | protein_co 7/12    | -     | ENST000001 | ENSP000001 | 1048        |
| ENSG000001 | Transcript | ENST000001 | protein_co 2/14    | -     | ENST000001 | ENSP000001 | 281         |
| ENSG000001 | Transcript | ENST000001 | protein_co 141/146 | -     | ENST000001 | ENSP000001 | 26099       |
| ENSG000001 | Transcript | ENST000001 | protein_co 136/146 | -     | ENST000001 | ENSP000001 | 25072       |



|            |            |            |                    |        |            |            |           |
|------------|------------|------------|--------------------|--------|------------|------------|-----------|
| ENSG000001 | Transcript | ENST000001 | protein_co 135/146 | -      | ENST000001 | ENSP000001 | 24928     |
| ENSG000001 | Transcript | ENST000001 | protein_co 125/146 | -      | ENST000001 | ENSP000001 | 23279     |
| ENSG000001 | Transcript | ENST000001 | protein_co 118/146 | -      | ENST000001 | ENSP000001 | 22131     |
| ENSG000001 | Transcript | ENST000001 | protein_co 89/146  | -      | ENST000001 | ENSP000001 | 17607     |
| ENSG000001 | Transcript | ENST000001 | protein_co 88/146  | -      | ENST000001 | ENSP000001 | 17351     |
| ENSG000001 | Transcript | ENST000001 | protein_co 86/146  | -      | ENST000001 | ENSP000001 | 17102     |
| ENSG000001 | Transcript | ENST000001 | protein_co 82/146  | -      | ENST000001 | ENSP000001 | 16478     |
| ENSG000001 | Transcript | ENST000001 | protein_co 78/146  | -      | ENST000001 | ENSP000001 | 14225     |
| ENSG000001 | Transcript | ENST000001 | protein_co 68/146  | -      | ENST000001 | ENSP000001 | 11617     |
| ENSG000001 | Transcript | ENST000001 | protein_co 52/146  | -      | ENST000001 | ENSP000001 | 8341      |
| ENSG000001 | Transcript | ENST000001 | protein_co -       | 9/145  | ENST000001 | -          | -         |
| ENSG000001 | Transcript | ENST000001 | protein_co 6/38    | -      | ENST000001 | ENSP000001 | 905       |
| ENSG000001 | Transcript | ENST000001 | protein_co 38/38   | -      | ENST000001 | ENSP000001 | 5589      |
| ENSG000001 | Transcript | ENST000001 | protein_co 1/1     | -      | ENST000001 | ENSP000001 | 3920      |
| ENSG000001 | Transcript | ENST000001 | protein_co 3/8     | -      | ENST000001 | ENSP000001 | 432       |
| ENSG000001 | Transcript | ENST000001 | protein_co -       | 3/18   | ENST000001 | -          | -         |
| ENSG000001 | Transcript | ENST000001 | protein_co 11/12   | -      | ENST000001 | ENSP000001 | 1547-1550 |
| ENSG000001 | Transcript | ENST000001 | protein_co 1/14    | -      | ENST000001 | ENSP000001 | 510       |
| ENSG000001 | Transcript | ENST000001 | protein_co 10/14   | -      | ENST000001 | ENSP000001 | 1564      |
| ENSG000001 | Transcript | ENST000001 | protein_co 2/12    | -      | ENST000001 | ENSP000001 | 456       |
| ENSG000001 | Transcript | ENST000001 | protein_co 4/12    | -      | ENST000001 | ENSP000001 | 4109      |
| ENSG000001 | Transcript | ENST000001 | protein_co 12/12   | -      | ENST000001 | ENSP000001 | 6559      |
| ENSG000001 | Transcript | ENST000001 | protein_co 3/11    | -      | ENST000001 | ENSP000001 | 3787      |
| ENSG000001 | Transcript | ENST000001 | protein_co 10/11   | -      | ENST000001 | ENSP000001 | 5207      |
| ENSG000001 | Transcript | ENST000001 | protein_co 3/10    | -      | ENST000001 | ENSP000001 | 552       |
| ENSG000001 | Transcript | ENST000001 | protein_co 17/22   | -      | ENST000001 | ENSP000001 | 2811      |
| ENSG000001 | Transcript | ENST000001 | protein_co -       | 10-Mar | ENST000001 | -          | -         |
| ENSG000001 | Transcript | ENST000001 | protein_co 38/51   | -      | ENST000001 | ENSP000001 | 5755      |
| ENSG000001 | Transcript | ENST000001 | protein_co 34/51   | -      | ENST000001 | ENSP000001 | 5127      |
| ENSG000001 | Transcript | ENST000001 | protein_co -       | 23/50  | ENST000001 | -          | -         |
| ENSG000001 | Transcript | ENST000001 | protein_co 20/20   | -      | ENST000001 | ENSP000001 | 3423      |
| ENSG000001 | Transcript | ENST000001 | protein_co -       | 5/19   | ENST000001 | -          | -         |
| ENSG000001 | Transcript | ENST000001 | protein_co -       | 15/20  | ENST000001 | -          | -         |
| ENSG000001 | Transcript | ENST000001 | protein_co -       | 13/20  | ENST000001 | -          | -         |
| ENSG000001 | Transcript | ENST000001 | protein_co 11/21   | -      | ENST000001 | ENSP000001 | 2814      |
| ENSG000001 | Transcript | ENST000001 | protein_co -       | 31/71  | ENST000001 | -          | -         |
| ENSG000001 | Transcript | ENST000001 | protein_co 40/72   | -      | ENST000001 | ENSP000001 | 5954      |
| ENSG000001 | Transcript | ENST000001 | protein_co 40/72   | -      | ENST000001 | ENSP000001 | 5958      |
| ENSG000001 | Transcript | ENST000001 | protein_co 40/72   | -      | ENST000001 | ENSP000001 | 5977      |
| ENSG000001 | Transcript | ENST000001 | protein_co -       | 57/71  | ENST000001 | -          | -         |
| ENSG000001 | Transcript | ENST000001 | protein_co -       | 28/41  | ENST000001 | -          | -         |
| ENSG000001 | Transcript | ENST000001 | protein_co -       | 4/10   | ENST000001 | -          | -         |
| ENSG000001 | Transcript | ENST000001 | protein_co 5/11    | -      | ENST000001 | ENSP000001 | 645       |
| ENSG000001 | Transcript | ENST000001 | protein_co 10/11   | -      | ENST000001 | ENSP000001 | 1063      |
| ENSG000001 | Transcript | ENST000001 | protein_co 48/59   | -      | ENST000001 | ENSP000001 | 7401      |
| ENSG000001 | Transcript | ENST000001 | protein_co 45/59   | -      | ENST000001 | ENSP000001 | 6965      |
| ENSG000001 | Transcript | ENST000001 | protein_co 40/59   | -      | ENST000001 | ENSP000001 | 6254      |



|            |            |            |            |       |       |            |            |      |
|------------|------------|------------|------------|-------|-------|------------|------------|------|
| ENSG000001 | Transcript | ENST000001 | protein_co | 31/59 | -     | ENST000001 | ENSP000001 | 4631 |
| ENSG000001 | Transcript | ENST000001 | protein_co | -     | 10/58 | ENST000001 | -          | -    |
| ENSG000001 | Transcript | ENST000001 | protein_co | 9/59  | -     | ENST000001 | ENSP000001 | 1546 |
| ENSG000001 | Transcript | ENST000001 | protein_co | -     | 42/44 | ENST000001 | -          | -    |
| ENSG000001 | Transcript | ENST000001 | protein_co | 19/24 | -     | ENST000001 | ENSP000001 | 3561 |
| ENSG000001 | Transcript | ENST000001 | protein_co | -     | 20/23 | ENST000001 | -          | -    |
| ENSG000001 | Transcript | ENST000001 | protein_co | -     | 20/23 | ENST000001 | -          | -    |
| ENSG000001 | Transcript | ENST000001 | protein_co | -     | 20/23 | ENST000001 | -          | -    |
| ENSG000001 | Transcript | ENST000001 | protein_co | -     | 20/23 | ENST000001 | -          | -    |
| ENSG000001 | Transcript | ENST000001 | protein_co | 9/35  | -     | ENST000001 | ENSP000001 | 1460 |
| ENSG000001 | Transcript | ENST000001 | protein_co | -     | 23/34 | ENST000001 | -          | -    |
| ENSG000001 | Transcript | ENST000001 | protein_co | -     | 29/34 | ENST000001 | -          | -    |
| ENSG000001 | Transcript | ENST000001 | protein_co | 34/35 | -     | ENST000001 | ENSP000001 | 4378 |
| ENSG000001 | Transcript | ENST000001 | protein_co | 11/11 | -     | ENST000001 | ENSP000001 | 1711 |
| ENSG000001 | Transcript | ENST000001 | protein_co | 4/11  | -     | ENST000001 | ENSP000001 | 382  |



|           |         |      |           |   |   |    |   |            |
|-----------|---------|------|-----------|---|---|----|---|------------|
| 1174      | 392     | P/S  | Cca/Tca   | - | - | -1 | - | HGNC       |
| 736       | 246     | Q/*  | Cag/Tag   | - | - | 1  | - | HGNC       |
| -         | -       | -    | -         | - | - | 1  | - | HGNC       |
| 53        | 18      | N/T  | aAc/aCc   | - | - | 1  | - | HGNC       |
| 476       | 159     | R/I  | aGa/aTa   | - | - | 1  | - | HGNC       |
| 1242      | 414     | N    | aaT/aaC   | - | - | 1  | - | HGNC       |
| 1627      | 543     | P/T  | Cca/Aca   | - | - | 1  | - | HGNC       |
| 1635      | 545     | E/D  | gaA/gaC   | - | - | 1  | - | HGNC       |
| -         | -       | -    | -         | - | - | 1  | - | HGNC       |
| -         | -       | -    | -         | - | - | 1  | - | HGNC       |
| 1542      | 514     | K/N  | aaA/aaT   | - | - | 1  | - | HGNC       |
| 3655      | 1219    | L/I  | Ctt/Att   | - | - | 1  | - | HGNC       |
| -         | -       | -    | -         | - | - | -1 | - | HGNC       |
| -         | -       | -    | -         | - | - | -1 | - | HGNC       |
| -         | -       | -    | -         | - | - | -1 | - | HGNC       |
| -         | -       | -    | -         | - | - | -1 | - | HGNC       |
| 1717      | 573     | I/V  | Atc/Gtc   | - | - | -1 | - | HGNC       |
| 1500      | 500     | E/D  | gaG/gaT   | - | - | 1  | - | HGNC       |
| -         | -       | -    | -         | - | - | 1  | - | HGNC       |
| -         | -       | -    | -         | - | - | 1  | - | HGNC       |
| -         | -       | -    | -         | - | - | 1  | - | HGNC       |
| -         | -       | -    | -         | - | - | 1  | - | HGNC       |
| -         | -       | -    | -         | - | - | 1  | - | HGNC       |
| -         | -       | -    | -         | - | - | -1 | - | HGNC       |
| -         | -       | -    | -         | - | - | -1 | - | HGNC       |
| 330       | 110     | E/D  | gaG/gaT   | - | - | -1 | - | HGNC       |
| 2354      | 785     | R/Q  | cGg/cAg   | - | - | 1  | - | HGNC       |
| 1697      | 566     | L/R  | cTg/cGg   | - | - | 1  | - | HGNC       |
| -         | -       | -    | -         | - | - | -1 | - | HGNC       |
| -         | -       | -    | -         | - | - | 1  | - | Clone_base |
| 207       | 69      | N    | aaC/aaT   | - | - | 1  | - | HGNC       |
| 4326      | 1442    | T    | acA/acG   | - | - | 1  | - | HGNC       |
| -         | -       | -    | -         | - | - | -1 | - | HGNC       |
| 1017      | 339     | S/R  | agT/agG   | - | - | -1 | - | HGNC       |
| -         | -       | -    | -         | - | - | -1 | - | HGNC       |
| 993       | 331     | S    | tcA/tcC   | - | - | -1 | - | HGNC       |
| -         | -       | -    | -         | - | - | -1 | - | HGNC       |
| -         | -       | -    | -         | - | - | -1 | - | HGNC       |
| -         | -       | -    | -         | - | - | -1 | - | HGNC       |
| -         | -       | -    | -         | - | - | -1 | - | HGNC       |
| -         | -       | -    | -         | - | - | -1 | - | HGNC       |
| 2197      | 733     | K/E  | Aaa/Gaa   | - | - | 1  | - | HGNC       |
| 2660-2662 | 887-888 | QK/Q | cAGAag/ca | - | - | 1  | - | HGNC       |
| 780       | 260     | H/Q  | caC/caA   | - | - | 1  | - | HGNC       |
| 692       | 231     | N/S  | aAc/aGc   | - | - | 1  | - | HGNC       |
| 559       | 187     | A/T  | Gcc/Acc   | - | - | -1 | - | HGNC       |
| 887       | 296     | L/R  | cTt/cGt   | - | - | 1  | - | HGNC       |

|       |      |     |         |   |   |    |   |      |
|-------|------|-----|---------|---|---|----|---|------|
| 907   | 303  | D/H | Gat/Cat | - | - | 1  | - | HGNC |
| 3163  | 1055 | G/C | Ggt/Tgt | - | - | 1  | - | HGNC |
| -     | -    | -   | -       | - | - | 1  | - | HGNC |
| -     | -    | -   | -       | - | - | 1  | - | HGNC |
| -     | -    | -   | -       | - | - | 1  | - | HGNC |
| 2299  | 767  | A/S | Gca/Tca | - | - | 1  | - | HGNC |
| 3840  | 1280 | S   | agC/agT | - | - | -1 | - | HGNC |
| 2739  | 913  | */Y | taA/taC | - | - | -1 | - | HGNC |
| 172   | 58   | P/S | Ccc/Tcc | - | - | -1 | - | HGNC |
| -     | -    | -   | -       | - | - | -1 | - | HGNC |
| -     | -    | -   | -       | - | - | -1 | - | HGNC |
| -     | -    | -   | -       | - | - | -1 | - | HGNC |
| -     | -    | -   | -       | - | - | -1 | - | HGNC |
| 13835 | 4612 | Q/L | cAg/cTg | - | - | -1 | - | HGNC |
| 13481 | 4494 | V/G | gTg/gGg | - | - | -1 | - | HGNC |
| 13290 | 4430 | P   | ccT/ccG | - | - | -1 | - | HGNC |
| 8573  | 2858 | Q/P | cAa/cCa | - | - | -1 | - | HGNC |
| 8273  | 2758 | L/R | cTt/cGt | - | - | -1 | - | HGNC |
| -     | -    | -   | -       | - | - | -1 | - | HGNC |
| -     | -    | -   | -       | - | - | -1 | - | HGNC |
| -     | -    | -   | -       | - | - | -1 | - | HGNC |
| -     | -    | -   | -       | - | - | 1  | - | HGNC |
| -     | -    | -   | -       | - | - | 1  | - | HGNC |
| 1543  | 515  | G/R | Gga/Aga | - | - | 1  | - | HGNC |
| 3079  | 1027 | V/M | Gtg/Atg | - | - | 1  | - | HGNC |
| 3513  | 1171 | A   | gcC/gcT | - | - | 1  | - | HGNC |
| -     | -    | -   | -       | - | - | 1  | - | HGNC |
| 7370  | 2457 | K/R | aAg/aGg | - | - | 1  | - | HGNC |
| 9223  | 3075 | T/P | Acc/Ccc | - | - | 1  | - | HGNC |
| -     | -    | -   | -       | - | - | 1  | - | HGNC |
| -     | -    | -   | -       | - | - | 1  | - | HGNC |
| 1766  | 589  | K/T | aAa/aCa | - | - | 1  | - | HGNC |
| -     | -    | -   | -       | - | - | -1 | - | HGNC |
| -     | -    | -   | -       | - | - | -1 | - | HGNC |
| -     | -    | -   | -       | - | - | -1 | - | HGNC |
| 1749  | 583  | S   | agC/agT | - | - | 1  | - | HGNC |
| -     | -    | -   | -       | - | - | 1  | - | HGNC |
| -     | -    | -   | -       | - | - | 1  | - | HGNC |
| 3292  | 1098 | L   | Ctg/Ttg | - | - | 1  | - | HGNC |
| -     | -    | -   | -       | - | - | 1  | - | HGNC |
| 3633  | 1211 | T   | acC/acA | - | - | -1 | - | HGNC |
| -     | -    | -   | -       | - | - | -1 | - | HGNC |
| -     | -    | -   | -       | - | - | -1 | - | HGNC |
| 114   | 38   | T   | acA/acG | - | - | -1 | - | HGNC |
| -     | -    | -   | -       | - | - | -1 | - | HGNC |
| 510   | 170  | Q/H | caG/caC | - | - | -1 | - | HGNC |
| 1687  | 563  | S/C | Agc/Tgc | - | - | -1 | - | HGNC |

|           |         |        |           |   |   |    |    |      |
|-----------|---------|--------|-----------|---|---|----|----|------|
| 855       | 285     | H      | caC/caT   | - | - | -1 | -  | HGNC |
| -         | -       | -      | -         | - | - | 1  | -  | HGNC |
| -         | -       | -      | -         | - | - | -1 | -  | HGNC |
| 1527-1528 | 509-510 | -/MSSX | -/ATGAGTT | - | - | -1 | -  | HGNC |
| -         | -       | -      | -         | - | - | -1 | -  | HGNC |
| -         | -       | -      | -         | - | - | -1 | -  | HGNC |
| 1166      | 389     | Y/C    | tAt/tGt   | - | - | 1  | -  | HGNC |
| 3739      | 1247    | K/X    | Aaa/aa    | - | - | 1  | -  | HGNC |
| -         | -       | -      | -         | - | - | -1 | -  | HGNC |
| 2080      | 694     | E/*    | Gaa/Taa   | - | - | -1 | -  | HGNC |
| 2010      | 670     | I      | atA/atT   | - | - | -1 | -  | HGNC |
| 2042      | 681     | Y/C    | tAc/tGc   | - | - | -1 | -  | HGNC |
| -         | -       | -      | -         | - | - | 1  | -  | HGNC |
| 1720      | 574     | P/X    | Ccc/cc    | - | - | 1  | -  | HGNC |
| 1308      | 436     | V      | gtG/gtA   | - | - | 1  | -  | HGNC |
| -         | -       | -      | -         | - | - | -1 | -  | HGNC |
| 3866      | 1289    | S/T    | aGc/aCc   | - | - | -1 | -  | HGNC |
| -         | -       | -      | -         | - | - | -1 | -  | HGNC |
| 6262      | 2088    | L/V    | Ctg/Gtg   | - | - | -1 | -  | HGNC |
| -         | -       | -      | -         | - | - | -1 | -  | HGNC |
| 788       | 263     | F/C    | tTt/tGt   | - | - | -1 | -  | HGNC |
| 1222      | 408     | M/V    | Atg/Gtg   | - | - | 1  | -  | HGNC |
| 126-127   | 42-43   | -/X    | -/G       | - | - |    | -1 | HGNC |
| 1526      | 509     | A/V    | gCc/gTc   | - | - | 1  | -  | HGNC |
| -         | -       | -      | -         | - | - | 1  | -  | HGNC |
| 960       | 320     | G      | ggC/ggG   | - | - | -1 | -  | HGNC |
| 117       | 39      | P      | ccC/ccG   | - | - | 1  | -  | HGNC |
| -         | -       | -      | -         | - | - | 1  | -  | HGNC |
| 2858      | 953     | R/L    | cGg/cTg   | - | - | 1  | -  | HGNC |
| 2034      | 678     | F      | ttC/ttT   | - | - | -1 | -  | HGNC |
| -         | -       | -      | -         | - | - | 1  | -  | HGNC |
| 2526      | 842     | E/D    | gaA/gaC   | - | - | -1 | -  | HGNC |
| -         | -       | -      | -         | - | - | -1 | -  | HGNC |
| 1168      | 390     | D/Y    | Gac/Tac   | - | - | -1 | -  | HGNC |
| -         | -       | -      | -         | - | - | 1  | -  | HGNC |
| -         | -       | -      | -         | - | - | 1  | -  | HGNC |
| -         | -       | -      | -         | - | - | 1  | -  | HGNC |
| 4439      | 1480    | Q/R    | cAa/cGa   | - | - | 1  | -  | HGNC |
| -         | -       | -      | -         | - | - | 1  | -  | HGNC |
| -         | -       | -      | -         | - | - | 1  | -  | HGNC |
| 2575      | 859     | S/A    | Tcc/Gcc   | - | - | -1 | -  | HGNC |
| 2071      | 691     | V/L    | Gta/Tta   | - | - | -1 | -  | HGNC |
| -         | -       | -      | -         | - | - | -1 | -  | HGNC |
| 862       | 288     | D/N    | Gac/Aac   | - | - | -1 | -  | HGNC |
| -         | -       | -      | -         | - | - | -1 | -  | HGNC |
| 540       | 180     | D      | gaC/gaT   | - | - | 1  | -  | HGNC |
| 3561      | 1187    | E      | gaG/gaA   | - | - | -1 | -  | HGNC |





|           |      |     |         |   |   |    |     |      |
|-----------|------|-----|---------|---|---|----|-----|------|
| 624       | 208  | R/S | agG/agT | - | - | -1 | -   | HGNC |
| 1224      | 408  | V   | gtG/gtA | - | - | 1  | -   | HGNC |
| 5708      | 1903 | I/T | aTc/aCc | - | - | -1 | -   | HGNC |
| -         | -    | -   | -       | - | - | -1 | -   | HGNC |
| -         | -    | -   | -       | - | - | -1 | -   | HGNC |
| 3522      | 1174 | P   | ccG/ccT | - | - | -1 | -   | HGNC |
| 3338      | 1113 | D/G | gAt/gGt | - | - | -1 | -   | HGNC |
| -         | -    | -   | -       | - | - | -1 | -   | HGNC |
| 753       | 251  | C/W | tgC/tgG | - | - | -1 | -   | HGNC |
| 64        | 22   | C/R | Tgt/Cgt | - | - | -1 | -   | HGNC |
| 1057      | 353  | V/M | Gtg/Atg | - | - | 1  | -   | HGNC |
| -         | -    | -   | -       | - | - | 1  | -   | HGNC |
| -         | -    | -   | -       | - | - | 1  | -   | HGNC |
| -         | -    | -   | -       | - | - |    | 1 - | HGNC |
| 7777      | 2593 | L/V | Tta/Gta | - | - | 1  | -   | HGNC |
| 1078      | 360  | S/P | Tca/Cca | - | - | -1 | -   | HGNC |
| 2394      | 798  | F/L | ttT/ttG | - | - | 1  | -   | HGNC |
| -         | -    | -   | -       | - | - | 1  | -   | HGNC |
| 2485      | 829  | P/T | Cca/Aca | - | - | 1  | -   | HGNC |
| 2900      | 967  | G/V | gGc/gTc | - | - | 1  | -   | HGNC |
| -         | -    | -   | -       | - | - | 1  | -   | HGNC |
| 4699      | 1567 | A/P | Gca/Cca | - | - | -1 | -   | HGNC |
| 2428      | 810  | R/G | Aga/Gga | - | - | -1 | -   | HGNC |
| 74        | 25   | Q/L | cAg/cTg | - | - | -1 | -   | HGNC |
| -         | -    | -   | -       | - | - | -1 | -   | HGNC |
| 716       | 239  | T/S | aCt/aGt | - | - | -1 | -   | HGNC |
| 5292      | 1764 | D   | gaC/gaT | - | - | -1 | -   | HGNC |
| 4504      | 1502 | P/S | Ccc/Tcc | - | - | -1 | -   | HGNC |
| 1804      | 602  | C/R | Tgt/Cgt | - | - | 1  | -   | HGNC |
| 3316      | 1106 | L/V | Ctt/Gtt | - | - | -1 | -   | HGNC |
| 799       | 267  | A/T | Gca/Aca | - | - | 1  | -   | HGNC |
| 1325      | 442  | A/V | gCc/gTc | - | - | -1 | -   | HGNC |
| 5670      | 1890 | G   | ggA/ggG | - | - | 1  | -   | HGNC |
| -         | -    | -   | -       | - | - | -1 | -   | HGNC |
| -         | -    | -   | -       | - | - | 1  | -   | HGNC |
| -         | -    | -   | -       | - | - | -1 | -   | HGNC |
| 761       | 254  | T/I | aCc/aTc | - | - | 1  | -   | HGNC |
| 3571      | 1191 | F/V | Ttt/Gtt | - | - | -1 | -   | HGNC |
| 3554      | 1185 | F/S | tTc/tCc | - | - | -1 | -   | HGNC |
| -         | -    | -   | -       | - | - | -1 | -   | HGNC |
| 6155      | 2052 | R/Q | cGa/cAa | - | - | -1 | -   | HGNC |
| 6043      | 2015 | I/V | Atc/Gtc | - | - | -1 | -   | HGNC |
| 6037      | 2013 | L   | Cta/Tta | - | - | -1 | -   | HGNC |
| 6019      | 2007 | E/* | Gag/Tag | - | - | -1 | -   | HGNC |
| 6014-6015 | 2005 | L/Q | cTC/cAA | - | - | -1 | -   | HGNC |
| 5582      | 1861 | S/Y | tCc/tAc | - | - | -1 | -   | HGNC |
| 5569      | 1857 | R/C | Cgc/Tgc | - | - | -1 | -   | HGNC |





|           |      |      |          |   |      |    |   |      |
|-----------|------|------|----------|---|------|----|---|------|
| 814-815   | 272  | E/EX | gaa/gAaa | - | -    | 1  | - | HGNC |
| -         | -    | -    | -        | - | -    | -1 | - | HGNC |
| 2913      | 971  | L    | ctT/ctA  | - | -    | -1 | - | HGNC |
| 2833      | 945  | A/T  | Gca/Aca  | - | -    | -1 | - | HGNC |
| -         | -    | -    | -        | - | -    | -1 | - | HGNC |
| 1118      | 373  | S/Y  | tCt/tAt  | - | -    | 1  | - | HGNC |
| 1749      | 583  | R    | agG/agA  | - | -    | -1 | - | HGNC |
| 1552      | 518  | R/*  | Cga/Tga  | - | -    | -1 | - | HGNC |
| -         | -    | -    | -        | - | -    | -1 | - | HGNC |
| 1583      | 528  | S/N  | aGc/aAc  | - | -    | -1 | - | HGNC |
| -         | -    | -    | -        | - | -    | 1  | - | HGNC |
| -         | -    | -    | -        | - | 4753 | 1  | - | HGNC |
| 1081      | 361  | K/X  | Aaa/aa   | - | -    | 1  | - | HGNC |
| 1085      | 362  | K/R  | aAa/aGa  | - | -    | 1  | - | HGNC |
| -         | -    | -    | -        | - | -    | 1  | - | HGNC |
| -         | -    | -    | -        | - | -    | 1  | - | HGNC |
| 705       | 235  | E/D  | gaA/gaT  | - | -    | 1  | - | HGNC |
| -         | -    | -    | -        | - | -    | 1  | - | HGNC |
| 1670      | 557  | E/V  | gAg/gTg  | - | -    | 1  | - | HGNC |
| 6967      | 2323 | Q/*  | Cag/Tag  | - | -    | 1  | - | HGNC |
| -         | -    | -    | -        | - | -    | 1  | - | HGNC |
| 14111-141 | 4704 | S/SX | agc/agCc | - | -    | 1  | - | HGNC |
| 1614      | 538  | E/D  | gaA/gaC  | - | -    | -1 | - | HGNC |
| -         | -    | -    | -        | - | -    | -1 | - | HGNC |
| 1650      | 550  | C/W  | tgC/tgG  | - | -    | -1 | - | HGNC |
| 353       | 118  | S/F  | tCc/tTc  | - | -    | -1 | - | HGNC |
| 233       | 78   | R/I  | aGa/aTa  | - | -    | -1 | - | HGNC |
| -         | -    | -    | -        | - | -    | 1  | - | HGNC |
| 4594      | 1532 | R/W  | Cgg/Tgg  | - | -    | -1 | - | HGNC |
| 2132      | 711  | V/A  | gTc/gCc  | - | -    | -1 | - | HGNC |
| 3255      | 1085 | A    | gcA/gcC  | - | -    | -1 | - | HGNC |
| -         | -    | -    | -        | - | -    | -1 | - | HGNC |
| 331       | 111  | P/S  | Cca/Tca  | - | -    | -1 | - | HGNC |
| 398       | 133  | Y/F  | tAc/tTc  | - | -    | 1  | - | HGNC |
| 1191      | 397  | V    | gtT/gtC  | - | -    | 1  | - | HGNC |
| 4707      | 1569 | D    | gaC/gaT  | - | -    | 1  | - | HGNC |
| -         | -    | -    | -        | - | -    | 1  | - | HGNC |
| -         | -    | -    | -        | - | -    | 1  | - | HGNC |
| 962-963   | 321  | Q/HX | cag/caTg | - | -    | 1  | - | HGNC |
| 728       | 243  | V/A  | gTg/gCg  | - | -    | 1  | - | HGNC |
| -         | -    | -    | -        | - | -    | 1  | - | HGNC |
| 1596      | 532  | P    | ccC/ccG  | - | -    | 1  | - | HGNC |
| 1133      | 378  | P/L  | cCt/cTt  | - | -    | 1  | - | HGNC |
| 882       | 294  | G    | ggC/ggT  | - | -    | 1  | - | HGNC |
| 133       | 45   | R/S  | Cgc/Agc  | - | -    | 1  | - | HGNC |
| 25497     | 8499 | I    | atC/atA  | - | -    | -1 | - | HGNC |
| 24470     | 8157 | S/*  | tCa/tAa  | - | -    | -1 | - | HGNC |

|           |         |      |          |   |   |    |   |      |
|-----------|---------|------|----------|---|---|----|---|------|
| 24326     | 8109    | Q/R  | cAg/cGg  | - | - | -1 | - | HGNC |
| 22677     | 7559    | D    | gaC/gaT  | - | - | -1 | - | HGNC |
| 21529     | 7177    | Q/E  | Caa/Gaa  | - | - | -1 | - | HGNC |
| 17005     | 5669    | L/F  | Ctc/Ttc  | - | - | -1 | - | HGNC |
| 16749     | 5583    | L    | ctG/ctT  | - | - | -1 | - | HGNC |
| 16500     | 5500    | K/N  | aaG/aaT  | - | - | -1 | - | HGNC |
| 15876     | 5292    | P    | ccG/ccT  | - | - | -1 | - | HGNC |
| 13623     | 4541    | S/R  | agT/agG  | - | - | -1 | - | HGNC |
| 11015     | 3672    | N/S  | aAc/aGc  | - | - | -1 | - | HGNC |
| 7739      | 2580    | R/I  | aGa/aTa  | - | - | -1 | - | HGNC |
| -         | -       | -    | -        | - | - | -1 | - | HGNC |
| 895       | 299     | V/L  | Gtg/Ctg  | - | - | 1  | - | HGNC |
| 5579      | 1860    | S/F  | tCt/tTt  | - | - | 1  | - | HGNC |
| 3830      | 1277    | P/L  | cCt/cTt  | - | - | -1 | - | HGNC |
| 404       | 135     | G/A  | gGg/gCg  | - | - | 1  | - | HGNC |
| -         | -       | -    | -        | - | - | -1 | - | HGNC |
| 1272-1275 | 424-425 | KR/X | aaGAGG/a | - | - | 1  | - | HGNC |
| 3         | 1       | M/I  | atG/atT  | - | - | 1  | - | HGNC |
| 1057      | 353     | P/S  | Cct/Tct  | - | - | 1  | - | HGNC |
| 247       | 83      | N/D  | Aat/Gat  | - | - | 1  | - | HGNC |
| 3900      | 1300    | T    | acC/acA  | - | - | 1  | - | HGNC |
| 6350      | 2117    | V/D  | gTt/gAt  | - | - | 1  | - | HGNC |
| 2927      | 976     | Q/L  | cAg/cTg  | - | - | 1  | - | HGNC |
| 4347      | 1449    | S/X  | tcT/tc   | - | - | 1  | - | HGNC |
| 292       | 98      | A/T  | Gca/Aca  | - | - | -1 | - | HGNC |
| 2646      | 882     | Q/H  | caG/caT  | - | - | 1  | - | HGNC |
| -         | -       | -    | -        | - | - | -1 | - | HGNC |
| 5458      | 1820    | S/T  | Tcg/Acg  | - | - | -1 | - | HGNC |
| 4830      | 1610    | I    | atT/atC  | - | - | -1 | - | HGNC |
| -         | -       | -    | -        | - | - | -1 | - | HGNC |
| 3339      | 1113    | R    | cgC/cgT  | - | - | -1 | - | HGNC |
| -         | -       | -    | -        | - | - | -1 | - | HGNC |
| -         | -       | -    | -        | - | - | -1 | - | HGNC |
| -         | -       | -    | -        | - | - | -1 | - | HGNC |
| 2440      | 814     | E/K  | Gaa/Aaa  | - | - | -1 | - | HGNC |
| -         | -       | -    | -        | - | - | 1  | - | HGNC |
| 5745      | 1915    | E/D  | gaA/gaC  | - | - | 1  | - | HGNC |
| 5749      | 1917    | R/*  | Cga/Tga  | - | - | 1  | - | HGNC |
| 5768      | 1923    | A/V  | gCg/gTg  | - | - | 1  | - | HGNC |
| -         | -       | -    | -        | - | - | 1  | - | HGNC |
| -         | -       | -    | -        | - | - | 1  | - | HGNC |
| -         | -       | -    | -        | - | - | 1  | - | HGNC |
| 323       | 108     | I/S  | aTt/aGt  | - | - | 1  | - | HGNC |
| 741       | 247     | E    | gaG/gaA  | - | - | 1  | - | HGNC |
| 6794      | 2265    | R/Q  | cGa/cAa  | - | - | -1 | - | HGNC |
| 6358      | 2120    | K/E  | Aaa/Gaa  | - | - | -1 | - | HGNC |
| 5647      | 1883    | R    | Agg/Cgg  | - | - | -1 | - | HGNC |

|      |      |     |         |   |   |    |   |      |
|------|------|-----|---------|---|---|----|---|------|
| 4024 | 1342 | M/V | Atg/Gtg | - | - | -1 | - | HGNC |
| -    | -    | -   | -       | - | - | -1 | - | HGNC |
| 939  | 313  | S   | tcC/tcG | - | - | -1 | - | HGNC |
| -    | -    | -   | -       | - | - | 1  | - | HGNC |
| 3130 | 1044 | Q/* | Cag/Tag | - | - | 1  | - | HGNC |
| -    | -    | -   | -       | - | - | 1  | - | HGNC |
| -    | -    | -   | -       | - | - | 1  | - | HGNC |
| -    | -    | -   | -       | - | - | 1  | - | HGNC |
| -    | -    | -   | -       | - | - | 1  | - | HGNC |
| 1211 | 404  | I/X | aTt/at  | - | - | 1  | - | HGNC |
| -    | -    | -   | -       | - | - | 1  | - | HGNC |
| -    | -    | -   | -       | - | - | 1  | - | HGNC |
| 4129 | 1377 | G/C | Ggt/Tgt | - | - | 1  | - | HGNC |
| 1503 | 501  | Q/X | caG/ca  | - | - | -1 | - | HGNC |
| 174  | 58   | S   | tcA/tcG | - | - | -1 | - | HGNC |

| HGNC_ID | CANONICA | MANE | TSL | APPRIS | CCDS      | ENSP             | SWISSPROT  | TREMBL |
|---------|----------|------|-----|--------|-----------|------------------|------------|--------|
| 173     | YES      | -    | -   | -      | CCDS33301 | ENSP0000C P27037 | B4DWQ2     |        |
| 17178   | YES      | -    | -   | -      | CCDS31778 | ENSP0000C P59510 | -          |        |
| 7135    | YES      | -    | -   | -      | CCDS54775 | ENSP0000C P51825 | Q712L1,F5I |        |
| 7135    | YES      | -    | -   | -      | CCDS54775 | ENSP0000C P51825 | Q712L1,F5I |        |
| 379     | YES      | -    | -   | -      | CCDS5622. | ENSP0000C Q99996 | Q8IW64     |        |
| 379     | YES      | -    | -   | -      | CCDS5622. | ENSP0000C Q99996 | Q8IW64     |        |
| 379     | YES      | -    | -   | -      | CCDS5622. | ENSP0000C Q99996 | Q8IW64     |        |
| 379     | YES      | -    | -   | -      | CCDS5622. | ENSP0000C Q99996 | Q8IW64     |        |
| 379     | YES      | -    | -   | -      | CCDS5622. | ENSP0000C Q99996 | Q8IW64     |        |
| 379     | YES      | -    | -   | -      | CCDS5622. | ENSP0000C Q99996 | Q8IW64     |        |
| 379     | YES      | -    | -   | -      | CCDS5622. | ENSP0000C Q99996 | Q8IW64     |        |
| 379     | YES      | -    | -   | -      | CCDS5622. | ENSP0000C Q99996 | Q8IW64     |        |
| 379     | YES      | -    | -   | -      | CCDS5622. | ENSP0000C Q99996 | Q8IW64     |        |
| 379     | YES      | -    | -   | -      | CCDS5622. | ENSP0000C Q99996 | Q8IW64     |        |
| 392     | YES      | -    | -   | -      | CCDS12552 | ENSP0000C P31751 | Q05BV0,M   |        |
| 393     | YES      | -    | -   | -      | CCDS31077 | ENSP0000C Q9Y243 | F8VS91     |        |
| 427     | YES      | -    | -   | -      | CCDS33172 | ENSP0000C Q9UM73 | Q580I3     |        |
| 583     | YES      | -    | -   | -      | CCDS4107. | ENSP0000C P25054 | Q9UM98,Q   |        |
| 583     | YES      | -    | -   | -      | CCDS4107. | ENSP0000C P25054 | Q9UM98,Q   |        |
| 583     | YES      | -    | -   | -      | CCDS4107. | ENSP0000C P25054 | Q9UM98,Q   |        |
| 583     | YES      | -    | -   | -      | CCDS4107. | ENSP0000C P25054 | Q9UM98,Q   |        |
| 583     | YES      | -    | -   | -      | CCDS4107. | ENSP0000C P25054 | Q9UM98,Q   |        |
| 644     | YES      | -    | -   | -      | CCDS14387 | ENSP0000C -      | Q9NUA2,Q   |        |
| 11110   | YES      | -    | -   | -      | CCDS285.1 | ENSP0000C O14497 | Q96T01,Q9  |        |
| 11110   | YES      | -    | -   | -      | CCDS285.1 | ENSP0000C O14497 | Q96T01,Q9  |        |
| 11110   | YES      | -    | -   | -      | CCDS285.1 | ENSP0000C O14497 | Q96T01,Q9  |        |
| 11110   | YES      | -    | -   | -      | CCDS285.1 | ENSP0000C O14497 | Q96T01,Q9  |        |
| 11110   | YES      | -    | -   | -      | CCDS285.1 | ENSP0000C O14497 | Q96T01,Q9  |        |
| 18037   | YES      | -    | -   | -      | CCDS31783 | ENSP0000C Q68CP9 | Q96SQ4,F8  |        |
| 700     | YES      | -    | -   | -      | CCDS970.1 | ENSP0000C P27540 | -          |        |
| 795     | YES      | -    | -   | -      | CCDS31665 | ENSP0000C Q13315 | M0QXY8,E9  |        |
| 795     | YES      | -    | -   | -      | CCDS31665 | ENSP0000C Q13315 | M0QXY8,E9  |        |
| 795     | YES      | -    | -   | -      | CCDS31665 | ENSP0000C Q13315 | M0QXY8,E9  |        |
| 882     | YES      | -    | -   | -      | CCDS3124. | ENSP0000C Q13535 | -          |        |
| 882     | YES      | -    | -   | -      | CCDS3124. | ENSP0000C Q13535 | -          |        |
| 882     | YES      | -    | -   | -      | CCDS3124. | ENSP0000C Q13535 | -          |        |
| 882     | YES      | -    | -   | -      | CCDS3124. | ENSP0000C Q13535 | -          |        |
| 882     | YES      | -    | -   | -      | CCDS3124. | ENSP0000C Q13535 | -          |        |
| 882     | YES      | -    | -   | -      | CCDS3124. | ENSP0000C Q13535 | -          |        |
| 886     | YES      | -    | -   | -      | CCDS14434 | ENSP0000C P46100 | B4DLE1     |        |
| 11393   | YES      | -    | -   | -      | CCDS13451 | ENSP0000C O14965 | Q5QPD4,Q   |        |
| 11390   | YES      | -    | -   | -      | CCDS11134 | ENSP0000C Q96GD4 | J3QR41,J3K |        |
| 11391   | YES      | -    | -   | -      | CCDS33128 | ENSP0000C Q9UQB9 | -          |        |
| 945     | YES      | -    | -   | -      | CCDS4968. | ENSP0000C O60242 | S4R3D0,B7  |        |
| 945     | YES      | -    | -   | -      | CCDS4968. | ENSP0000C O60242 | S4R3D0,B7  |        |
| 989     | YES      | -    | -   | -      | CCDS704.1 | ENSP0000C O95999 | -          |        |
| 989     | YES      | -    | -   | -      | CCDS704.1 | ENSP0000C O95999 | -          |        |
| 13221   | YES      | -    | -   | -      | CCDS1862. | ENSP0000C Q9H165 | D6W5D9,Q   |        |

|       |     |   |   |   |                             |            |
|-------|-----|---|---|---|-----------------------------|------------|
| 1001  | YES | - | - | - | CCDS3289. ENSP0000C P41182  | C9JL16,C9J |
| 1008  | YES | - | - | - | CCDS3083. ENSP0000C O00512  | -          |
| 1008  | YES | - | - | - | CCDS3083. ENSP0000C O00512  | -          |
| 591   | YES | - | - | - | CCDS8315. ENSP0000C Q13489  | -          |
| 591   | YES | - | - | - | CCDS8315. ENSP0000C Q13489  | -          |
| 591   | YES | - | - | - | CCDS8315. ENSP0000C Q13489  | -          |
| 591   | YES | - | - | - | CCDS8315. ENSP0000C Q13489  | -          |
| 591   | YES | - | - | - | CCDS8315. ENSP0000C Q13489  | -          |
| 593   | YES | - | - | - | CCDS3275. ENSP0000C -       | H3BLT4     |
| 593   | YES | - | - | - | CCDS3275. ENSP0000C -       | H3BLT4     |
| 1058  | YES | - | - | - | CCDS1036. ENSP0000C P54132  | -          |
| 1058  | YES | - | - | - | CCDS1036. ENSP0000C P54132  | -          |
| 14211 | YES | - | - | - | CCDS7446. ENSP0000C Q8WV28  | Q2MD56     |
| 20473 | YES | - | - | - | CCDS11631. ENSP0000C Q9BX63 | J3KS24     |
| 20473 | YES | - | - | - | CCDS11631. ENSP0000C Q9BX63 | J3KS24     |
| 20473 | YES | - | - | - | CCDS11631. ENSP0000C Q9BX63 | J3KS24     |
| 16393 | YES | - | - | - | CCDS5336. ENSP0000C Q9BXL7  | Q8TES3,E2  |
| 24054 | YES | - | - | - | CCDS4202. ENSP0000C Q8NG31  | -          |
| 24054 | YES | - | - | - | CCDS4202. ENSP0000C Q8NG31  | -          |
| 1541  | YES | - | - | - | CCDS8418. ENSP0000C P22681  | -          |
| 16783 | YES | - | - | - | CCDS1382. ENSP0000C Q6P1J9  | -          |
| 16783 | YES | - | - | - | CCDS1382. ENSP0000C Q6P1J9  | -          |
| 1748  | YES | - | - | - | CCDS1086. ENSP0000C P12830  | B3GN61     |
| 1750  | YES | - | - | - | CCDS1080. ENSP0000C P55287  | H3BUU9,H   |
| 1759  | YES | - | - | - | CCDS11891. ENSP0000C P19022 | C9JMH2,C9  |
| 1759  | YES | - | - | - | CCDS11891. ENSP0000C P19022 | C9JMH2,C9  |
| 1760  | YES | - | - | - | CCDS11977. ENSP0000C Q9HBT6 | Q8N9J3,K7  |
| 24224 | YES | - | - | - | CCDS11337. ENSP0000C Q9NYV4 | -          |
| 1773  | YES | - | - | - | CCDS8953. ENSP0000C P11802  | Q6LC83,F8  |
| -     | YES | - | - | - | - ENSP0000C -               | F2Z2F3     |
| 14214 | YES | - | - | - | CCDS12601. ENSP0000C Q96RK0 | -          |
| 14214 | YES | - | - | - | CCDS12601. ENSP0000C Q96RK0 | -          |
| 2197  | YES | - | - | - | CCDS11561. ENSP0000C P02452 | Q9UMA6,C   |
| 30185 | YES | - | - | - | CCDS2562. ENSP0000C Q96SW2  | -          |
| 30185 | YES | - | - | - | CCDS2562. ENSP0000C Q96SW2  | -          |
| 2348  | YES | - | - | - | CCDS1050. ENSP0000C Q92793  | Q75MY6,I3  |
| 19291 | YES | - | - | - | CCDS6315. ENSP0000C Q7Z407  | -          |
| 19291 | YES | - | - | - | CCDS6315. ENSP0000C Q7Z407  | -          |
| 19291 | YES | - | - | - | CCDS6315. ENSP0000C Q7Z407  | -          |
| 19291 | YES | - | - | - | CCDS6315. ENSP0000C Q7Z407  | -          |
| 19291 | YES | - | - | - | CCDS6315. ENSP0000C Q7Z407  | -          |
| 2509  | YES | - | - | - | CCDS3424. ENSP0000C P35221  | F8W845,E5  |
| 2509  | YES | - | - | - | CCDS3424. ENSP0000C P35221  | F8W845,E5  |
| 2514  | YES | - | - | - | CCDS2694. ENSP0000C P35222  | G9GAG7,E5  |
| 2621  | YES | - | - | - | CCDS7436. ENSP0000C P33261  | -          |
| 2625  | YES | - | - | - | CCDS46721. ENSP0000C -      | Q6NWU0,C   |
| 2701  | YES | - | - | - | CCDS11952. ENSP0000C P43146 | J3QQJ6     |

|       |     |   |   |   |                            |             |
|-------|-----|---|---|---|----------------------------|-------------|
| 2701  | YES | - | - | - | CCDS11952 ENSP0000C P43146 | J3QQJ6      |
| 2701  | YES | - | - | - | CCDS11952 ENSP0000C P43146 | J3QQJ6      |
| 2701  | YES | - | - | - | CCDS11952 ENSP0000C P43146 | J3QQJ6      |
| 2731  | YES | - | - | - | CCDS1241. ENSP0000C Q16832 | Q5T245,Q5   |
| 2731  | YES | - | - | - | CCDS1241. ENSP0000C Q16832 | Q5T245,Q5   |
| 2731  | YES | - | - | - | CCDS1241. ENSP0000C Q16832 | Q5T245,Q5   |
| 17098 | YES | - | - | - | CCDS9931. ENSP0000C Q9UPY3 | Q5D0K5,B3   |
| 2978  | YES | - | - | - | CCDS33157 ENSP0000C Q9Y6K1 | Q8WVA9,C    |
| 2978  | YES | - | - | - | CCDS33157 ENSP0000C Q9Y6K1 | Q8WVA9,C    |
| 3012  | YES | - | - | - | CCDS30777 ENSP0000C Q12882 | -           |
| 3012  | YES | - | - | - | CCDS30777 ENSP0000C Q12882 | -           |
| 3012  | YES | - | - | - | CCDS30777 ENSP0000C Q12882 | -           |
| 3012  | YES | - | - | - | CCDS30777 ENSP0000C Q12882 | -           |
| 1090  | YES | - | - | - | CCDS47443 ENSP0000C Q03001 | Q86T18      |
| 1090  | YES | - | - | - | CCDS47443 ENSP0000C Q03001 | Q86T18      |
| 1090  | YES | - | - | - | CCDS47443 ENSP0000C Q03001 | Q86T18      |
| 1090  | YES | - | - | - | CCDS47443 ENSP0000C Q03001 | Q86T18      |
| 1090  | YES | - | - | - | CCDS47443 ENSP0000C Q03001 | Q86T18      |
| 1090  | YES | - | - | - | CCDS47443 ENSP0000C Q03001 | Q86T18      |
| 1090  | YES | - | - | - | CCDS47443 ENSP0000C Q03001 | Q86T18      |
| 3373  | YES | - | - | - | CCDS1401C ENSP0000C Q09472 | B5A250      |
| 3373  | YES | - | - | - | CCDS1401C ENSP0000C Q09472 | B5A250      |
| 11958 | YES | - | - | - | CCDS31925 ENSP0000C Q96L91 | -           |
| 11958 | YES | - | - | - | CCDS31925 ENSP0000C Q96L91 | -           |
| 11958 | YES | - | - | - | CCDS31925 ENSP0000C Q96L91 | -           |
| 11958 | YES | - | - | - | CCDS31925 ENSP0000C Q96L91 | -           |
| 11958 | YES | - | - | - | CCDS31925 ENSP0000C Q96L91 | -           |
| 11958 | YES | - | - | - | CCDS31925 ENSP0000C Q96L91 | -           |
| 3387  | YES | - | - | - | CCDS2922. ENSP0000C P29320 | -           |
| 3387  | YES | - | - | - | CCDS2922. ENSP0000C P29320 | -           |
| 3387  | YES | - | - | - | CCDS2922. ENSP0000C P29320 | -           |
| 3390  | YES | - | - | - | CCDS5031. ENSP0000C Q15375 | -           |
| 3390  | YES | - | - | - | CCDS5031. ENSP0000C Q15375 | -           |
| 3390  | YES | - | - | - | CCDS5031. ENSP0000C Q15375 | -           |
| 3392  | YES | - | - | - | CCDS46921 ENSP0000C P54762 | C9K090,C9J. |
| 3430  | YES | - | - | - | CCDS32642 ENSP0000C P04626 | Q9NP09,J3   |
| 3430  | YES | - | - | - | CCDS32642 ENSP0000C P04626 | Q9NP09,J3   |
| 3430  | YES | - | - | - | CCDS32642 ENSP0000C P04626 | Q9NP09,J3   |
| 3431  | YES | - | - | - | CCDS31833 ENSP0000C P21860 | Q9NNX2,F8   |
| 3432  | YES | - | - | - | CCDS2394. ENSP0000C Q15303 | Q580Q7,Q5   |
| 3432  | YES | - | - | - | CCDS2394. ENSP0000C Q15303 | Q580Q7,Q5   |
| 3432  | YES | - | - | - | CCDS2394. ENSP0000C Q15303 | Q580Q7,Q5   |
| 3446  | YES | - | - | - | CCDS46648 ENSP0000C P11308 | Q16031,B4   |
| 3490  | YES | - | - | - | CCDS55088 ENSP0000C P50549 | C9J9L1,C9J. |
| 3493  | YES | - | - | - | CCDS11465 ENSP0000C P43268 | K7EMW0      |
| 3512  | YES | - | - | - | CCDS6324. ENSP0000C Q16394 | T2FFJ4,S5Y  |

|       |     |   |   |   |                            |            |
|-------|-----|---|---|---|----------------------------|------------|
| 3512  | YES | - | - | - | CCDS6324. ENSP0000C Q16394 | T2FFJ4,S5Y |
| 3513  | YES | - | - | - | CCDS53618 ENSP0000C Q93063 | E9PNL9,E9I |
| 3527  | YES | - | - | - | CCDS5891. ENSP0000C Q15910 | Q75MQ0,C   |
| 26837 | YES | - | - | - | CCDS14377 ENSP0000C Q5JTC6 | -          |
| 3582  | YES | - | - | - | CCDS32515 ENSP0000C O15360 | H3BT53     |
| 3582  | YES | - | - | - | CCDS32515 ENSP0000C O15360 | H3BT53     |
| 3585  | YES | - | - | - | CCDS2595. ENSP0000C Q9BXW9 | -          |
| 3585  | YES | - | - | - | CCDS2595. ENSP0000C Q9BXW9 | -          |
| 18794 | YES | - | - | - | CCDS12196 ENSP0000C Q75N90 | -          |
| 16712 | YES | - | - | - | CCDS3777. ENSP0000C Q969H0 | S4R3N3,H9  |
| 3688  | YES | - | - | - | CCDS55223 ENSP0000C P11362 | E9PN14,D3  |
| 3689  | YES | - | - | - | CCDS7620. ENSP0000C P21802 | Q9UMB0,C   |
| 3690  | YES | - | - | - | CCDS54706 ENSP0000C P22607 | Q8NI16     |
| 3690  | YES | - | - | - | CCDS54706 ENSP0000C P22607 | Q8NI16     |
| 3691  | YES | - | - | - | CCDS4410. ENSP0000C P22455 | G3JVM2,E7  |
| 3765  | YES | - | - | - | CCDS31953 ENSP0000C P36888 | -          |
| 3767  | YES | - | - | - | CCDS4457. ENSP0000C P35916 | D6RFF2     |
| 3778  | YES | - | - | - | CCDS42814 ENSP0000C P02751 | Q9H382,Q7  |
| 3778  | YES | - | - | - | CCDS42814 ENSP0000C P02751 | Q9H382,Q7  |
| 3778  | YES | - | - | - | CCDS42814 ENSP0000C P02751 | Q9H382,Q7  |
| 3819  | YES | - | - | - | CCDS9371. ENSP0000C Q12778 | -          |
| 3821  | YES | - | - | - | CCDS5068. ENSP0000C O43524 | B4DVZ6     |
| 3823  | YES | - | - | - | CCDS58837 ENSP0000C -      | Q8IXF4,E9F |
| 20842 | YES | - | - | - | CCDS34447 ENSP0000C Q8IVH2 | Q8N4A5,QI  |
| 24824 | YES | - | - | - | CCDS45916 ENSP0000C Q9UM11 | -          |
| 4171  | YES | - | - | - | CCDS3049. ENSP0000C P23769 | C9J965     |
| 4392  | YES | - | - | - | CCDS46622 ENSP0000C Q5JWF2 | S4R3W4,S4  |
| 17849 | YES | - | - | - | CCDS6097. ENSP0000C Q96PE1 | -          |
| 24885 | YES | - | - | - | CCDS42655 ENSP0000C Q4ZG55 | -          |
| 4684  | YES | - | - | - | CCDS5817C ENSP0000C P33402 | -          |
| 23576 | YES | - | - | - | CCDS6139. ENSP0000C Q86VS8 | -          |
| 5253  | YES | - | - | - | CCDS3216C ENSP0000C P07900 | Q96HX7,Q8  |
| 5253  | YES | - | - | - | CCDS3216C ENSP0000C P07900 | Q96HX7,Q8  |
| 5383  | YES | - | - | - | CCDS10355 ENSP0000C P48735 | HOYLL5,B4I |
| 5465  | YES | - | - | - | CCDS10378 ENSP0000C P08069 | HOYNR0,HC  |
| 5465  | YES | - | - | - | CCDS10378 ENSP0000C P08069 | HOYNR0,HC  |
| 5467  | YES | - | - | - | CCDS5273. ENSP0000C P11717 | A0N9R7,AC  |
| 5467  | YES | - | - | - | CCDS5273. ENSP0000C P11717 | A0N9R7,AC  |
| 5960  | YES | - | - | - | CCDS6128. ENSP0000C O14920 | E5RGW5     |
| 14552 | YES | - | - | - | CCDS30996 ENSP0000C Q14164 | -          |
| 6021  | YES | - | - | - | CCDS3971. ENSP0000C P40189 | -          |
| 6021  | YES | - | - | - | CCDS3971. ENSP0000C P40189 | -          |
| 6021  | YES | - | - | - | CCDS3971. ENSP0000C P40189 | -          |
| 6021  | YES | - | - | - | CCDS3971. ENSP0000C P40189 | -          |
| 6021  | YES | - | - | - | CCDS3971. ENSP0000C P40189 | -          |
| 6119  | YES | - | - | - | CCDS4469. ENSP0000C Q15306 | -          |
| 6126  | YES | - | - | - | CCDS9510. ENSP0000C Q9Y4H2 | Q9UP29,Q8  |



[illegible]

|       |     |   |   |   |                            |            |
|-------|-----|---|---|---|----------------------------|------------|
| 6720  | YES | - | - | - | CCDS33747 ENSP0000C P02788 | C9J0S5,A8k |
| 946   | YES | - | - | - | CCDS3378C ENSP0000C Q96QZ7 | -          |
| 16259 | YES | - | - | - | CCDS44714 ENSP0000C Q8IZL2 | -          |
| 16259 | YES | - | - | - | CCDS44714 ENSP0000C Q8IZL2 | -          |
| 16259 | YES | - | - | - | CCDS44714 ENSP0000C Q8IZL2 | -          |
| 6840  | YES | - | - | - | CCDS10216 ENSP0000C Q02750 | A4QPA9     |
| 6896  | YES | - | - | - | CCDS31025 ENSP0000C Q9P0L2 | B4DIB3     |
| 13538 | YES | - | - | - | CCDS56097 ENSP0000C Q96L34 | Q96GZ3,K7  |
| 26530 | YES | - | - | - | CCDS1194C ENSP0000C Q96M91 | -          |
| 6916  | YES | - | - | - | CCDS5932C ENSP0000C -      | K7ESN0     |
| 6943  | YES | - | - | - | CCDS957.1 ENSP0000C Q07820 | B4DG83     |
| 7010  | YES | - | - | - | CCDS8083. ENSP0000C O00255 | Q9GZQ5     |
| 7029  | YES | - | - | - | CCDS47685 ENSP0000C P08581 | Q9UEJ3,B4  |
| 7029  | YES | - | - | - | CCDS47685 ENSP0000C P08581 | Q9UEJ3,B4  |
| 7105  | YES | - | - | - | CCDS43106 ENSP0000C O75030 | C9K0S7     |
| 7105  | YES | - | - | - | CCDS43106 ENSP0000C O75030 | C9K0S7     |
| 7127  | YES | - | - | - | CCDS2663. ENSP0000C P40692 | Q5GJ64,F2: |
| 7132  | YES | - | - | - | CCDS55791 ENSP0000C Q03164 | Q9UPD0,Q:  |
| 7132  | YES | - | - | - | CCDS55791 ENSP0000C Q03164 | Q9UPD0,Q:  |
| 7133  | YES | - | - | - | CCDS44873 ENSP0000C O14686 | Q6PIA1,Q5  |
| 13726 | YES | - | - | - | CCDS5931. ENSP0000C Q8NEZ4 | Q6N019,Q:  |
| 13726 | YES | - | - | - | CCDS5931. ENSP0000C Q8NEZ4 | Q6N019,Q:  |
| 13726 | YES | - | - | - | CCDS5931. ENSP0000C Q8NEZ4 | Q6N019,Q:  |
| 13726 | YES | - | - | - | CCDS5931. ENSP0000C Q8NEZ4 | Q6N019,Q:  |
| 13726 | YES | - | - | - | CCDS5931. ENSP0000C Q8NEZ4 | Q6N019,Q:  |
| 13726 | YES | - | - | - | CCDS5931. ENSP0000C Q8NEZ4 | Q6N019,Q:  |
| 13726 | YES | - | - | - | CCDS5931. ENSP0000C Q8NEZ4 | Q6N019,Q:  |
| 16063 | YES | - | - | - | CCDS55708 ENSP0000C P55197 | Q71UR7,B4  |
| 16063 | YES | - | - | - | CCDS55708 ENSP0000C P55197 | Q71UR7,B4  |
| 16063 | YES | - | - | - | CCDS55708 ENSP0000C P55197 | Q71UR7,B4  |
| 7217  | YES | - | - | - | CCDS483.1 ENSP0000C P40238 | -          |
| 7217  | YES | - | - | - | CCDS483.1 ENSP0000C P40238 | -          |
| 7230  | YES | - | - | - | CCDS8299. ENSP0000C P49959 | Q9BS79,F5  |
| 7325  | YES | - | - | - | CCDS1834. ENSP0000C P43246 | Q53RU4,C9  |
| 7325  | YES | - | - | - | CCDS1834. ENSP0000C P43246 | Q53RU4,C9  |
| 7325  | YES | - | - | - | CCDS1834. ENSP0000C P43246 | Q53RU4,C9  |
| 7325  | YES | - | - | - | CCDS1834. ENSP0000C P43246 | Q53RU4,C9  |
| 3942  | YES | - | - | - | CCDS127.1 ENSP0000C P42345 | Q96QW8,B   |
| 7468  | YES | - | - | - | CCDS1614. ENSP0000C Q99707 | -          |
| 7468  | YES | - | - | - | CCDS1614. ENSP0000C Q99707 | -          |
| 7468  | YES | - | - | - | CCDS1614. ENSP0000C Q99707 | -          |
| 7468  | YES | - | - | - | CCDS1614. ENSP0000C Q99707 | -          |
| 7508  | YES | - | - | - | CCDS5564C ENSP0000C -      | Q9UMI8,Q:  |
| 7508  | YES | - | - | - | CCDS5564C ENSP0000C -      | Q9UMI8,Q:  |
| 7527  | YES | - | - | - | CCDS520.1 ENSP0000C Q9UIF7 | E5KP26,Q8  |
| 7553  | YES | - | - | - | CCDS6359. ENSP0000C P01106 | Q6LBK7,B4  |
| 7553  | YES | - | - | - | CCDS6359. ENSP0000C P01106 | Q6LBK7,B4  |

[illegible]

|       |     |   |   |   |                            |            |
|-------|-----|---|---|---|----------------------------|------------|
| 15580 | YES | - | - | - | CCDS55627 ENSP0000C Q5VU43 | I1VE15     |
| 15580 | YES | - | - | - | CCDS55627 ENSP0000C Q5VU43 | I1VE15     |
| 15580 | YES | - | - | - | CCDS55627 ENSP0000C Q5VU43 | I1VE15     |
| 15580 | YES | - | - | - | CCDS55627 ENSP0000C Q5VU43 | I1VE15     |
| 15580 | YES | - | - | - | CCDS55627 ENSP0000C Q5VU43 | I1VE15     |
| 15580 | YES | - | - | - | CCDS55627 ENSP0000C Q5VU43 | I1VE15     |
| 15580 | YES | - | - | - | CCDS55627 ENSP0000C Q5VU43 | I1VE15     |
| 15580 | YES | - | - | - | CCDS55627 ENSP0000C Q5VU43 | I1VE15     |
| 15580 | YES | - | - | - | CCDS55627 ENSP0000C Q5VU43 | I1VE15     |
| 15580 | YES | - | - | - | CCDS55627 ENSP0000C Q5VU43 | I1VE15     |
| 15580 | YES | - | - | - | CCDS55627 ENSP0000C Q5VU43 | I1VE15     |
| 15580 | YES | - | - | - | CCDS55627 ENSP0000C Q5VU43 | I1VE15     |
| 15580 | YES | - | - | - | CCDS55627 ENSP0000C Q5VU43 | I1VE15     |
| 8803  | YES | - | - | - | CCDS3495. ENSP0000C P16234 | D6RIG5,D6  |
| 8803  | YES | - | - | - | CCDS3495. ENSP0000C P16234 | D6RIG5,D6  |
| 8804  | YES | - | - | - | CCDS4303. ENSP0000C P09619 | E5RJ14,E5F |
| 8804  | YES | - | - | - | CCDS4303. ENSP0000C P09619 | E5RJ14,E5F |
| 8845  | YES | - | - | - | CCDS11131 ENSP0000C O15534 | J3QLQ5,A2  |
| 8972  | YES | - | - | - | CCDS1446. ENSP0000C O00750 | Q5SW98,Q   |
| 8975  | YES | - | - | - | CCDS43171 ENSP0000C P42336 | Q4LE51,C9. |
| 8975  | YES | - | - | - | CCDS43171 ENSP0000C P42336 | Q4LE51,C9. |
| 8976  | YES | - | - | - | CCDS3104. ENSP0000C P42338 | Q9BTS4,Q6  |
| 8978  | YES | - | - | - | CCDS5739. ENSP0000C P48736 | Q24M88,E9  |
| 8979  | YES | - | - | - | CCDS3993. ENSP0000C P27986 | J7GXU7,J7C |
| 8979  | YES | - | - | - | CCDS3993. ENSP0000C P27986 | J7GXU7,J7C |
| 9016  | YES | - | - | - | CCDS4935. ENSP0000C P08F94 | -          |
| 9016  | YES | - | - | - | CCDS4935. ENSP0000C P08F94 | -          |
| 9016  | YES | - | - | - | CCDS4935. ENSP0000C P08F94 | -          |
| 9016  | YES | - | - | - | CCDS4935. ENSP0000C P08F94 | -          |
| 9016  | YES | - | - | - | CCDS4935. ENSP0000C P08F94 | -          |
| 9016  | YES | - | - | - | CCDS4935. ENSP0000C P08F94 | -          |
| 9121  | YES | - | - | - | CCDS2302. ENSP0000C P54277 | Q5FBZ2,C9. |
| 9121  | YES | - | - | - | CCDS2302. ENSP0000C P54277 | Q5FBZ2,C9. |
| 9122  | YES | - | - | - | CCDS5343. ENSP0000C P54278 | -          |
| 9122  | YES | - | - | - | CCDS5343. ENSP0000C P54278 | -          |
| 9122  | YES | - | - | - | CCDS5343. ENSP0000C P54278 | -          |
| 17284 | YES | - | - | - | CCDS5793. ENSP0000C Q9NUX5 | C9JPG9,A8I |
| 9388  | YES | - | - | - | CCDS11678 ENSP0000C P10644 | Q96P62,K7  |
| 9413  | YES | - | - | - | - ENSP0000C P78527         | F5GX40     |
| 9413  | YES | - | - | - | - ENSP0000C P78527         | F5GX40     |
| 9413  | YES | - | - | - | - ENSP0000C P78527         | F5GX40     |
| 9413  | YES | - | - | - | - ENSP0000C P78527         | F5GX40     |
| 9413  | YES | - | - | - | - ENSP0000C P78527         | F5GX40     |
| 9585  | YES | - | - | - | CCDS6714. ENSP0000C Q13635 | Q6TKQ0,F8  |
| 9585  | YES | - | - | - | CCDS6714. ENSP0000C Q13635 | Q6TKQ0,F8  |
| 9605  | YES | - | - | - | CCDS1371. ENSP0000C P35354 | D9MWI3     |
| 9605  | YES | - | - | - | CCDS1371. ENSP0000C P35354 | D9MWI3     |

|       |     |   |   |   |                            |            |
|-------|-----|---|---|---|----------------------------|------------|
| 9644  | YES | - | - | - | CCDS9163. ENSP0000C Q06124 | B3GUD4,B3  |
| 9668  | YES | - | - | - | CCDS4378C ENSP0000C P23468 | C9J6E4,B4C |
| 9668  | YES | - | - | - | CCDS4378C ENSP0000C P23468 | C9J6E4,B4C |
| 9668  | YES | - | - | - | CCDS4378C ENSP0000C P23468 | C9J6E4,B4C |
| 9682  | YES | - | - | - | CCDS4287C ENSP0000C O14522 | -          |
| 9816  | YES | - | - | - | CCDS3423C ENSP0000C Q92878 | C9JNH8,A8  |
| 9829  | YES | - | - | - | CCDS2612. ENSP0000C P04049 | L7RRS6     |
| 9829  | YES | - | - | - | CCDS2612. ENSP0000C P04049 | L7RRS6     |
| 9829  | YES | - | - | - | CCDS2612. ENSP0000C P04049 | L7RRS6     |
| 9842  | YES | - | - | - | CCDS6959. ENSP0000C Q12967 | Q9HAY0,Q9  |
| 9864  | YES | - | - | - | CCDS1136C ENSP0000C P10276 | Q6I9R7,J3C |
| 4552  | YES | - | - | - | CCDS6430. ENSP0000C P24298 | -          |
| 9954  | YES | - | - | - | CCDS1864. ENSP0000C Q04864 | -          |
| 9954  | YES | - | - | - | CCDS1864. ENSP0000C Q04864 | -          |
| 10061 | YES | - | - | - | CCDS1365. ENSP0000C Q99496 | -          |
| 10061 | YES | - | - | - | CCDS1365. ENSP0000C Q99496 | -          |
| 14539 | YES | - | - | - | CCDS5860C ENSP0000C Q63HN8 | H3BLU6     |
| 14539 | YES | - | - | - | CCDS5860C ENSP0000C Q63HN8 | H3BLU6     |
| 14539 | YES | - | - | - | CCDS5860C ENSP0000C Q63HN8 | H3BLU6     |
| 14539 | YES | - | - | - | CCDS5860C ENSP0000C Q63HN8 | H3BLU6     |
| 14539 | YES | - | - | - | CCDS5860C ENSP0000C Q63HN8 | H3BLU6     |
| 14539 | YES | - | - | - | CCDS5860C ENSP0000C Q63HN8 | H3BLU6     |
| 10261 | YES | - | - | - | CCDS5116. ENSP0000C P08922 | -          |
| 10431 | YES | - | - | - | CCDS3457C ENSP0000C Q15349 | D6RHW7,D   |
| 1535  | YES | - | - | - | CCDS5654C ENSP0000C Q06455 | Q9HBV9,E5  |
| 1535  | YES | - | - | - | CCDS5654C ENSP0000C Q06455 | Q9HBV9,E5  |
| 1535  | YES | - | - | - | CCDS5654C ENSP0000C Q06455 | Q9HBV9,E5  |
| 10680 | YES | - | - | - | CCDS3853. ENSP0000C P31040 | Q0QF12,B3  |
| 18420 | YES | - | - | - | CCDS2749. ENSP0000C Q9BYW2 | C9JG86     |
| 18420 | YES | - | - | - | CCDS2749. ENSP0000C Q9BYW2 | C9JG86     |
| 10768 | YES | - | - | - | CCDS3335C ENSP0000C O75533 | Q9NTB4,F8  |
| 10810 | YES | - | - | - | CCDS4747C ENSP0000C O00141 | E9PP33,E9I |
| 10810 | YES | - | - | - | CCDS4747C ENSP0000C O00141 | E9PP33,E9I |
| 6770  | YES | - | - | - | CCDS1195C ENSP0000C Q13485 | Q9BYG6,K7  |
| 6770  | YES | - | - | - | CCDS1195C ENSP0000C Q13485 | Q9BYG6,K7  |
| 11100 | YES | - | - | - | CCDS1225C ENSP0000C P51532 | B4DSI8,A7E |
| 11103 | YES | - | - | - | CCDS13817 ENSP0000C Q12824 | -          |
| 11103 | YES | - | - | - | CCDS13817 ENSP0000C Q12824 | -          |
| 11191 | YES | - | - | - | CCDS1654. ENSP0000C P35716 | Q05CHO     |
| 11195 | YES | - | - | - | CCDS3239. ENSP0000C P48431 | -          |
| 11283 | YES | - | - | - | CCDS1329C ENSP0000C P12931 | Q9H7V3,Q9  |
| 11283 | YES | - | - | - | CCDS1329C ENSP0000C P12931 | Q9H7V3,Q9  |
| 17209 | YES | - | - | - | CCDS2421. ENSP0000C Q9NRP7 | C9JDA4,C9. |
| 16466 | YES | - | - | - | CCDS7537. ENSP0000C Q9UMX1 | -          |
| 11491 | YES | - | - | - | CCDS6688. ENSP0000C P43405 | -          |
| 17089 | YES | - | - | - | CCDS5236. ENSP0000C Q8NF91 | -          |
| 17089 | YES | - | - | - | CCDS5236. ENSP0000C Q8NF91 | -          |

|       |     |   |   |   |                            |           |
|-------|-----|---|---|---|----------------------------|-----------|
| 17089 | YES | - | - | - | CCDS5236. ENSP0000C Q8NF91 | -         |
| 17089 | YES | - | - | - | CCDS5236. ENSP0000C Q8NF91 | -         |
| 17089 | YES | - | - | - | CCDS5236. ENSP0000C Q8NF91 | -         |
| 17089 | YES | - | - | - | CCDS5236. ENSP0000C Q8NF91 | -         |
| 17089 | YES | - | - | - | CCDS5236. ENSP0000C Q8NF91 | -         |
| 17089 | YES | - | - | - | CCDS5236. ENSP0000C Q8NF91 | -         |
| 17089 | YES | - | - | - | CCDS5236. ENSP0000C Q8NF91 | -         |
| 17089 | YES | - | - | - | CCDS5236. ENSP0000C Q8NF91 | -         |
| 17089 | YES | - | - | - | CCDS5236. ENSP0000C Q8NF91 | -         |
| 17089 | YES | - | - | - | CCDS5236. ENSP0000C Q8NF91 | -         |
| 17089 | YES | - | - | - | CCDS5236. ENSP0000C Q8NF91 | -         |
| 11535 | YES | - | - | - | CCDS14412 ENSP0000C P21675 | -         |
| 11535 | YES | - | - | - | CCDS14412 ENSP0000C P21675 | -         |
| 18056 | YES | - | - | - | CCDS35003 ENSP0000C Q8IZX4 | -         |
| 11600 | YES | - | - | - | CCDS14445 ENSP0000C Q9Y458 | C3TX51    |
| 11633 | YES | - | - | - | CCDS12074 ENSP0000C P15923 | Q6PJU3,K7 |
| 11640 | YES | - | - | - | CCDS1971. ENSP0000C Q9HCS4 | Q53T87,C9 |
| 11641 | YES | - | - | - | CCDS53577 ENSP0000C Q9NQBO | E2GH26,C6 |
| 11641 | YES | - | - | - | CCDS53577 ENSP0000C Q9NQBO | E2GH26,C6 |
| 29484 | YES | - | - | - | CCDS7281. ENSP0000C Q8NFU7 | -         |
| 29484 | YES | - | - | - | CCDS7281. ENSP0000C Q8NFU7 | -         |
| 29484 | YES | - | - | - | CCDS7281. ENSP0000C Q8NFU7 | -         |
| 25941 | YES | - | - | - | CCDS4712C ENSP0000C Q6N021 | E7EPB1,D6 |
| 25941 | YES | - | - | - | CCDS4712C ENSP0000C Q6N021 | E7EPB1,D6 |
| 11752 | YES | - | - | - | CCDS14315 ENSP0000C P19532 | B4DIA5    |
| 11785 | YES | - | - | - | CCDS32194 ENSP0000C P07996 | Q7KYY3,A8 |
| 11998 | YES | - | - | - | CCDS11118 ENSP0000C P04637 | S5LQU8,Q7 |
| 12017 | YES | - | - | - | CCDS41446 ENSP0000C P12270 | Q9UE33    |
| 12017 | YES | - | - | - | CCDS41446 ENSP0000C P12270 | Q9UE33    |
| 12017 | YES | - | - | - | CCDS41446 ENSP0000C P12270 | Q9UE33    |
| 16290 | YES | - | - | - | CCDS872.1 ENSP0000C Q9UPN9 | -         |
| 16290 | YES | - | - | - | CCDS872.1 ENSP0000C Q9UPN9 | -         |
| 12305 | YES | - | - | - | CCDS9899. ENSP0000C Q15643 | G3V4R7    |
| 12305 | YES | - | - | - | CCDS9899. ENSP0000C Q15643 | G3V4R7    |
| 12305 | YES | - | - | - | CCDS9899. ENSP0000C Q15643 | G3V4R7    |
| 12347 | YES | - | - | - | CCDS59066 ENSP0000C Q9Y4A5 | C9K0N1    |
| 12347 | YES | - | - | - | CCDS59066 ENSP0000C Q9Y4A5 | C9K0N1    |
| 12347 | YES | - | - | - | CCDS59066 ENSP0000C Q9Y4A5 | C9K0N1    |
| 12347 | YES | - | - | - | CCDS59066 ENSP0000C Q9Y4A5 | C9K0N1    |
| 12347 | YES | - | - | - | CCDS59066 ENSP0000C Q9Y4A5 | C9K0N1    |
| 12363 | YES | - | - | - | CCDS10458 ENSP0000C P49815 | -         |
| 12373 | YES | - | - | - | CCDS9872. ENSP0000C -      | Q0VAP8,F5 |
| 12373 | YES | - | - | - | CCDS9872. ENSP0000C -      | Q0VAP8,F5 |
| 12373 | YES | - | - | - | CCDS9872. ENSP0000C -      | Q0VAP8,F5 |
| 16806 | YES | - | - | - | CCDS34933 ENSP0000C O95071 | Q49A65,E5 |
| 16806 | YES | - | - | - | CCDS34933 ENSP0000C O95071 | Q49A65,E5 |
| 16806 | YES | - | - | - | CCDS34933 ENSP0000C O95071 | Q49A65,E5 |

|       |     |   |   |   |                            |            |
|-------|-----|---|---|---|----------------------------|------------|
| 16806 | YES | - | - | - | CCDS34933 ENSP0000C O95071 | Q49A65,E5  |
| 16806 | YES | - | - | - | CCDS34933 ENSP0000C O95071 | Q49A65,E5  |
| 16806 | YES | - | - | - | CCDS34933 ENSP0000C O95071 | Q49A65,E5  |
| 12632 | YES | - | - | - | CCDS4393C ENSP0000C Q93008 | -          |
| 12766 | YES | - | - | - | CCDS3394C ENSP0000C O96028 | D6RIS1,D6f |
| 12766 | YES | - | - | - | CCDS3394C ENSP0000C O96028 | D6RIS1,D6f |
| 12766 | YES | - | - | - | CCDS3394C ENSP0000C O96028 | D6RIS1,D6f |
| 12766 | YES | - | - | - | CCDS3394C ENSP0000C O96028 | D6RIS1,D6f |
| 12766 | YES | - | - | - | CCDS3394C ENSP0000C O96028 | D6RIS1,D6f |
| 12791 | YES | - | - | - | CCDS6082. ENSP0000C Q14191 | -          |
| 12791 | YES | - | - | - | CCDS6082. ENSP0000C Q14191 | -          |
| 12791 | YES | - | - | - | CCDS6082. ENSP0000C Q14191 | -          |
| 12791 | YES | - | - | - | CCDS6082. ENSP0000C Q14191 | -          |
| 11955 | YES | - | - | - | CCDS44817 ENSP0000C Q8TF68 | F5H3Z9,F5f |
| 11955 | YES | - | - | - | CCDS44817 ENSP0000C Q8TF68 | F5H3Z9,F5f |

| UNIPARC   | SIFT                   | PolyPhen | DOMAINS      | HGVS_OFF! AF | AFR_AF | AMR_AF | EAS_AF |
|-----------|------------------------|----------|--------------|--------------|--------|--------|--------|
| UPI000012 | -                      | -        | Superfamil   | -            |        |        |        |
| UPI000045 | -                      | -        | -            | -            |        |        |        |
| UPI000013 | -                      | -        | -            | -            |        |        |        |
| UPI000013 | -                      | -        | Pfam_dom     | -            |        |        |        |
| UPI000002 | deleterious possibly_d | -        | Coiled-coils | -            |        |        |        |
| UPI000002 | -                      | -        | -            | -            |        |        |        |
| UPI000002 | deleterious possibly_d | -        | Coiled-coils | -            |        |        |        |
| UPI000002 | -                      | -        | -            | -            |        |        |        |
| UPI000002 | -                      | -        | Coiled-coils | 6            |        |        |        |
| UPI000002 | deleterious possibly_d | -        | hmmpanth     | -            |        |        |        |
| UPI000002 | tolerated(C benign(0.0 | -        | hmmpanth     | -            |        |        |        |
| UPI000004 | tolerated(C benign(0.0 | -        | Gene3D:1.    | -            |        |        |        |
| UPI000003 | -                      | -        | -            | -            |        |        |        |
| UPI000016 | -                      | -        | Pfam_dom     | -            |        |        |        |
| UPI000013 | tolerated(C benign(0.0 | -        | hmmpanth     | -            |        |        |        |
| UPI000013 | -                      | -        | hmmpanth     | 1            |        |        |        |
| UPI000013 | -                      | -        | hmmpanth     | -            |        |        |        |
| UPI000013 | -                      | -        | hmmpanth     | 2            |        |        |        |
| UPI000013 | -                      | -        | Low_comp     | 4            |        |        |        |
| UPI000016 | -                      | -        | Gene3D:1.    | 2            |        |        |        |
| UPI000016 | -                      | -        | hmmpanth     | -            |        |        |        |
| UPI000016 | deleterious probably_c | -        | hmmpanth     | -            |        |        |        |
| UPI000016 | -                      | -        | Gene3D:1.    | -            |        |        |        |
| UPI000016 | -                      | -        | hmmpanth     | 3            |        |        |        |
| UPI000016 | deleterious probably_c | -        | Pfam_dom     | -            |        |        |        |
| UPI00001D | tolerated(1 benign(0.0 | -        | hmmpanth     | -            |        |        |        |
| UPI000003 | -                      | -        | -            | -            |        |        |        |
| UPI0000DE | -                      | -        | -            | -            |        |        |        |
| UPI0000DE | -                      | -        | -            | -            |        |        |        |
| UPI0000DE | -                      | -        | Superfamil   | -            |        |        |        |
| UPI000003 | -                      | -        | -            | -            |        |        |        |
| UPI000003 | -                      | -        | -            | -            |        |        |        |
| UPI000003 | -                      | -        | hmmpanth     | -            |        |        |        |
| UPI000003 | tolerated(C benign(0)  | -        | hmmpanth     | -            |        |        |        |
| UPI000003 | -                      | -        | -            | -            |        |        |        |
| UPI000003 | -                      | -        | -            | -            |        |        |        |
| UPI000016 | -                      | -        | -            | -            |        |        |        |
| UPI000013 | -                      | -        | hmmpanth     | -            |        |        |        |
| UPI000013 | -                      | -        | Gene3D:1.    | -            |        |        |        |
| UPI000013 | -                      | -        | -            | -            |        |        |        |
| UPI00001A | tolerated(C benign(0.1 | -        | -            | -            |        |        |        |
| UPI00001A | tolerated(C benign(0.0 | -        | -            | -            |        |        |        |
| UPI000012 | -                      | -        | -            | -            |        |        |        |
| UPI000012 | -                      | -        | -            | -            |        |        |        |
| UPI000013 | -                      | -        | -            | -            |        |        |        |



UPI000012 tolerated(C benign(0) hmmpanth -  
UPI000013 - - hmmpanth -  
UPI000013 - - - -  
UPI000000 tolerated(C benign(0.0) Gene3D:1.-  
UPI000000 tolerated(C benign(0) Gene3D:1.-  
UPI000000 - - Coiled-coil:-  
UPI000000 tolerated(C benign(0.2) hmmpanth -  
UPI000000 deleterious probably\_d hmmpanth -  
UPI000013 - - - -  
UPI000013 - - - -  
UPI000012 tolerated(C benign(0.0) - -  
UPI000012 deleterious benign(0.1) PROSITE\_p -  
UPI000006 - - - -  
UPI000013 - - - -  
UPI000013 - - - -  
UPI000013 - - - -  
UPI00003F tolerated(C benign(0.1) hmmpanth -  
UPI0000E5 tolerated(C benign(0.1) hmmpanth -  
UPI0000E5 - - - 4  
UPI000013 - - - 10  
UPI000002 - - - -  
UPI000002 - - - -  
UPI000003 - - - -  
UPI000013 - - - -  
UPI000013 - - - -

UPI000013 tolerated(C benign(0) hmmpanth -  
UPI000013 tolerated(C benign(0.0) Gene3D:4.-  
UPI000013 tolerated\_l benign(0.1) Low\_comp -  
UPI000011 - - - -  
UPI000045 - - - -  
UPI000013 - - hmmpanth -  
UPI000013 - - hmmpanth -  
UPI000013 - - - -1  
UPI000006 deleterious benign(0.0) hmmpanth -  
UPI000006 - - - -  
UPI000000 - - hmmpanth -  
UPI00001E - - - -  
UPI000012 tolerated(C benign(0.0) hmmpanth -  
UPI000012 - - hmmpanth 5  
UPI000012 deleterious probably\_d Gene3D:1.-  
UPI000013 tolerated(C benign(0.0) Gene3D:1.-  
UPI000015 tolerated(C benign(0.0) hmmpanth -  
UPI00001A tolerated(C benign(0.0) Low\_comp -

UPI00001A deleterious possibly\_d:PROSITE\_p -  
 UPI00001A deleterious possibly\_d:hmmpanth -  
 UPI00001A - - - -  
 UPI000013 - - - -  
 UPI000013 - - - -  
 UPI000013 deleterious benign(0.3)Gene3D:1.1 -  
 UPI000016 - - hmmpanth -  
 UPI000000 - - - -  
 UPI000000 tolerated\_l probably\_d hmmpanth -  
 UPI000045 - - - -  
 UPI00001C deleterious possibly\_d:Gene3D:1.1 -  
 UPI00001C deleterious probably\_d Gene3D:1.1 -  
 UPI00001C - - Gene3D:1.1 -  
 UPI00001C deleterious benign(0.0)Gene3D:1.1 -  
 UPI00001C deleterious probably\_d hmmpanth -  
 UPI00001C - - - -  
 UPI00001C - - - -  
 UPI00001C - - - -  
 UPI00001A - - - 6  
 UPI00001A - - - -  
 UPI000045 deleterious probably\_d hmmpanth -  
 UPI000045 tolerated(C benign(0.0)hmmpanth -  
 UPI000045 - - PROSITE\_p -  
 UPI000045 - - - -  
 UPI000045 deleterious probably\_d hmmpanth -  
 UPI000045 tolerated\_l benign(0.0)hmmpanth -  
 UPI000016 - - - -  
 UPI000016 - - - -  
 UPI000016 tolerated(C benign(0.2)hmmpanth -  
 UPI000004 - - - -  
 UPI000004 - - - -  
 UPI000004 - - - -  
 UPI000012 - - hmmpanth -  
 UPI000003 - - - -  
 UPI000003 - - - -  
 UPI000003 - - PIRSF\_dom -  
 UPI000012 - - - -  
 UPI000004 - - PIRSF\_dom -  
 UPI000004 - - - -  
 UPI000004 - - - -  
 UPI000018 - - hmmpanth -  
 UPI000012 - - - -  
 UPI000000 tolerated(C benign(0.0)Pfam\_dom -  
 UPI000012 deleterious probably\_d Superfamil -

|                                   |            |            |    |
|-----------------------------------|------------|------------|----|
| UPI000012                         | -          | Pfam_dom   | -  |
| UPI0000EE                         | -          | -          | 5  |
| UPI000006                         | -          | -          | -  |
| UPI0000ED                         | -          | Pfam_dom   | -  |
| UPI000052                         | -          | -          | -  |
| UPI000052                         | -          | -          | -  |
| UPI000006 deleterious probably_d  | hmmpanth   | -          |    |
| UPI000006                         | -          | hmmpanth   | 6  |
| UPI000013                         | -          | -          | -  |
| UPI000007                         | -          | SMART_do   | -  |
| UPI0001CE                         | -          | PROSITE_p  | -  |
| UPI000002 deleterious probably_d  | PROSITE_p  | -          |    |
| UPI000002                         | -          | -          | 2  |
| UPI000002                         | -          | Gene3D:1.1 | 4  |
| UPI000012                         | -          | Low_comp   | -  |
| UPI00001F                         | -          | -          | -1 |
| UPI000014 tolerated(C benign(0.0) | -          | -          | -  |
| UPI0000E5                         | -          | -          | -  |
| UPI0000E5 tolerated(C possibly_d  | hmmpanth   | -          |    |
| UPI0000E5                         | -          | -          | -  |
| UPI000013 tolerated(C probably_d  | Low_comp   | -          |    |
| UPI000012 tolerated(C benign(0.0) | hmmpanth   | -          |    |
| UPI000020                         | -          | -          | -  |
| UPI000007 deleterious probably_d  | Superfamil | -          |    |
| UPI00001D                         | -          | -          | -  |
| UPI000007                         | -          | PROSITE_p  | -  |
| UPI0000E4                         | -          | Low_comp   | -  |
| UPI00004A                         | -          | -          | -  |
| UPI000016 deleterious probably_d  | hmmpanth   | -          |    |
| UPI000002                         | -          | Gene3D:3.1 | -  |
| UPI000006                         | -          | -          | 8  |
| UPI000040 tolerated_l benign(0.2) | hmmpanth   | -          |    |
| UPI000040                         | -          | -          | -  |
| UPI000012 deleterious possibly_d  | hmmpanth   | -          |    |
| UPI000012                         | -          | -          | -  |
| UPI000012                         | -          | -          | -  |
| UPI000007                         | -          | -          | -  |
| UPI000007 tolerated(C benign(0.0) | hmmpanth   | -          |    |
| UPI000003                         | -          | -          | -  |
| UPI000003                         | -          | -          | -  |
| UPI000013 tolerated(C benign(0.0) | -          | -          |    |
| UPI000013 tolerated(C possibly_d  | hmmpanth   | -          |    |
| UPI000013                         | -          | -          | -5 |
| UPI000013 tolerated(C benign(0.2) | PROSITE_p  | -          |    |
| UPI000013                         | -          | -          | -  |
| UPI000012                         | -          | hmmpanth   | -  |
| UPI000006                         | -          | hmmpanth   | -  |

UPI000013 - - Gene3D:3n -  
 UPI000013 - - - -  
 UPI000013 deleterious probably\_c Pfam\_dom -  
 UPI000013 - - Gene3D:3n 3  
 UPI00001A - - - -  
 UPI00001A - - - -  
 UPI000016 - - - -  
 UPI000013 tolerated(C possibly\_d: hmmpanth -  
 UPI000013 - - - -  
 UPI000013 deleterious probably\_c hmmpanth -  
 UPI000013 tolerated(C benign(0.3: hmmpanth -  
 UPI000012 - - PIRSF\_dom -  
 UPI000012 - - - -  
 UPI000013 - - hmmpanth -  
 UPI000013 - - hmmpanth  
 UPI000013 tolerated(C benign(0.3: hmmpanth -  
 UPI000013 - - hmmpanth 5  
 UPI000013 deleterious probably\_c hmmpanth -  
 UPI000013 tolerated(C probably\_c hmmpanth -  
 UPI000013 tolerated(C benign(0.0: hmmpanth -  
 UPI000013 - - - -  
 UPI000003 - - - -  
 UPI000003 tolerated(C benign(0.0: PROSITE\_p -  
 UPI000003 tolerated(C probably\_c PROSITE\_p -  
 UPI000003 - - hmmpanth -  
 UPI000007 deleterious probably\_c hmmpanth -  
 UPI000000 tolerated(C benign(0.0: hmmpanth -  
 UPI000013 - - Gene3D:3.4 -  
 UPI000004 tolerated(C benign(0.0: hmmpanth -  
 UPI000004 - - - -  
 UPI000004 - - - -  
 UPI000004 - - - -  
 UPI000004 tolerated(C benign(0.0: Superfamil -  
 UPI000162 deleterious probably\_c PROSITE\_p -  
 UPI000162 deleterious probably\_c PROSITE\_p -  
 UPI00001B - - - -  
 UPI00001B - - - -  
 UPI00001B - - Pfam\_dom -  
 UPI00001B - - - -  
 UPI00001B tolerated(C benign(0) hmmpanth -  
 UPI00001B tolerated(C possibly\_d: PROSITE\_p -  
 UPI00001B - - - -  
 UPI00001B tolerated(C probably\_c PROSITE\_p -  
 UPI00001B - - PROSITE\_p -  
 UPI00001B - - - -

|                                  |   |                |   |
|----------------------------------|---|----------------|---|
| UPI000016 -                      | - | -              | - |
| UPI000045 -                      | - | hmmpanth -     |   |
| UPI00001B tolerated(C benign(0)  |   | hmmpanth -     |   |
| UPI00001B -                      | - | hmmpanth -     |   |
| UPI00001B deleterious probably_d |   | hmmpanth -     |   |
| UPI000013 tolerated(C benign(0.0 |   | Gene3D:1.-     |   |
| UPI000004 -                      | - | -              | - |
| UPI000004 deleterious benign(0.0 |   | PROSITE_p -    |   |
| UPI000014 -                      | - | -              | - |
| UPI0001F9 -                      | - | -              | - |
| UPI000006 deleterious probably_d |   | PROSITE_p -    |   |
| UPI000024 -                      | - | hmmpanth -     |   |
| UPI000014 deleterious possibly_d |   | PROSITE_p -    |   |
| UPI000014 deleterious probably_d |   | hmmpanth -     |   |
| UPI000002 -                      | - | -              | - |
| UPI000002 -                      | - | -              | - |
| UPI000000 deleterious probably_d |   | hmmpanth -     |   |
| UPI0001E5 deleterious benign(0.3 |   | PIRSF_dom -    |   |
| UPI0001E5 tolerated(C probably_d |   | PIRSF_dom -    |   |
| UPI0000EE -                      | - | -              | - |
| UPI000014 -                      | - | hmmpanth -     |   |
| UPI000014 -                      | - | hmmpanth -     |   |
| UPI000014 -                      | - | -              | - |
| UPI000014 -                      | - | -              | - |
| UPI000014 -                      | - | -              | - |
| UPI000014 tolerated_l benign(0.0 |   | -              |   |
| UPI000014 -                      | - | -              | - |
| UPI00001F -                      | - | -              |   |
| UPI00001F -                      | - | -              | - |
| UPI00001F -                      | - | -              | - |
| UPI000002 -                      | - | -              | - |
| UPI000002 -                      | - | -              | - |
| UPI000012 deleterious probably_d |   | hmmpanth -     |   |
| UPI000004 -                      | - | Gene3D:3.-     |   |
| UPI000004 -                      | - | -              | - |
| UPI000004 deleterious benign(0.3 |   | Gene3D:1.-     |   |
| UPI000004 -                      | - | Gene3D:3.2     |   |
| UPI000012 -                      | - | -              | - |
| UPI000003 tolerated(C benign(0.2 |   | Gene3D:3.-     |   |
| UPI000003 -                      | - | -              | - |
| UPI000003 -                      | - | -              | - |
| UPI000003 deleterious probably_d |   | Gene3D:2c -    |   |
| UPI000003 -                      | - | -              | - |
| UPI000003 -                      | - | hmmpanth -     |   |
| UPI000006 -                      | - | hmmpanth -     |   |
| UPI0000D6 -                      | - | Coiled-coils - |   |
| UPI0000D6 -                      | - | -              | - |

UPI000047 deleterious possibly\_d:hmmpanth -

UPI000012 - - Gene3D:4.-

UPI00005B tolerated(C benign(0.1: Coiled-coils -

UPI00005B - - -

UPI000012 - - -

UPI000012 - - hmmpanth -

UPI000012 deleterious possibly\_d:hmmpanth -

UPI000012 - - -

UPI000012 deleterious probably\_d:hmmpanth -

UPI000012 tolerated(C possibly\_d:hmmpanth -

UPI000193 tolerated(C probably\_d:hmmpanth -

UPI000193 - - - 1

UPI000012 - - -

UPI000012 - - -

UPI000012 tolerated\_l probably\_d:hmmpanth -

UPI000012 deleterious probably\_d:hmmpanth -

UPI000019 tolerated(C benign(0.0: hmmpanth -

UPI000019 - - -

UPI000019 tolerated(C benign(0.0: hmmpanth -

UPI000019 deleterious possibly\_d: - -

UPI000016 - - -

UPI0000DE deleterious benign(0.3: Gene3D:1.-

UPI0000DE deleterious probably\_d Coiled-coils -

UPI000003 tolerated(C benign(0.0: Gene3D:1.-

UPI000013 - - -

UPI000013 tolerated(C benign(0.3: Gene3D:2g -

UPI000013 - - PROSITE\_p -

UPI000013 tolerated(C benign(0.0: hmmpanth -

UPI000006 tolerated\_l benign(0) hmmpanth -

UPI000012 deleterious possibly\_d: PROSITE\_p -

UPI000013 deleterious possibly\_d: PROSITE\_p -

UPI000006 tolerated(C benign(0.3: hmmpanth -

UPI00001B - - Low\_comp -

UPI000013 - - -

UPI0000D6 - - -

UPI000013 - - -

UPI000004 tolerated(C benign(0.4: PROSITE\_p -

UPI000013 deleterious probably\_d Pfam\_dom -

UPI000013 deleterious probably\_d Pfam\_dom -

UPI000045 - - -

UPI000045 tolerated(C probably\_d:hmmpanth -

UPI000045 tolerated(1 benign(0.0: Coiled-coils -

UPI000045 - - Coiled-coils -

UPI000045 - - Coiled-coils -

UPI000045 deleterious probably\_d Coiled-coils -

UPI000045 deleterious probably\_d Coiled-coils -

UPI000045 deleterious probably\_d Coiled-coils -

UPI000045 deleterious possibly\_d:hmmpanth -  
 UPI000045 - - hmmpanth -  
 UPI000045 deleterious probably\_d:hmmpanth -  
 UPI000045 tolerated(C probably\_d Coiled-coils -  
 UPI000045 - - - -  
 UPI000045 - - hmmpanth -  
 UPI000045 deleterious benign(0.2: Coiled-coils -  
 UPI000045 - - - -  
 UPI000045 - - - -  
 UPI000045 - - - -  
 UPI000045 tolerated(C benign(0.3: Pfam\_dom -  
 UPI000045 deleterious probably\_d Pfam\_dom -  
 UPI000045 deleterious probably\_d Pfam\_dom -  
 UPI000013 - - Gene3D:2.1 -  
 UPI000013 tolerated(C benign(0) Gene3D:2.1 -  
 UPI000013 - - - -  
 UPI000013 tolerated(C benign(0.0: Gene3D:2.1 -  
 UPI000013 - - - -  
 UPI000020 tolerated\_l possibly\_d:hmmpanth -  
 UPI000013 - - - -  
 UPI000013 - - - -  
 UPI000004 tolerated(C benign(0.2: Gene3D:3.1 -  
 UPI000007 - - - -  
 UPI000013 - - Gene3D:2.1 -  
 UPI000013 - - Coiled-coils -  
 UPI000013 tolerated(C benign(0) hmmpanth -  
 UPI000013 deleterious probably\_d Gene3D:2.1 -  
 UPI000013 - - hmmpanth -  
 UPI000013 tolerated(C benign(0) - -  
 UPI000013 - - - -  
 UPI000013 tolerated(1 benign(0) - -  
 UPI000004 - - hmmpanth -  
 UPI000004 tolerated(C benign(0.1: Gene3D:1.1 -  
 UPI000013 - - hmmpanth -  
 UPI000013 - - Superfamil -  
 UPI000013 - - - -  
 UPI000007 - - - -  
 UPI000000 - - - -  
 UPI000045 - - PROSITE\_p -  
 UPI000045 deleterious possibly\_d: PROSITE\_p -  
 UPI000045 - - Pfam\_dom -  
 UPI000045 - - Gene3D:1.1 -  
 UPI000045 - - - -  
 UPI00001A tolerated(C probably\_d Superfamil -  
 UPI00001A - - - -  
 UPI000000 - - - -  
 UPI000000 - - - -

|           |                         |              |
|-----------|-------------------------|--------------|
| UPI000013 | -                       | Gene3D:3.1.4 |
| UPI000013 | -                       | -            |
| UPI000013 | -                       | Superfamily  |
| UPI000013 | tolerated(C benign(0.0) | Superfamily  |
| UPI000024 | -                       | -            |
| UPI000006 | deleterious possibly_d  | hmmpanth     |
| UPI000004 | -                       | Superfamily  |
| UPI000004 | -                       | Superfamily  |
| UPI000004 | -                       | -            |
| UPI000012 | deleterious probably_c  | Superfamily  |
| UPI000013 | -                       | -            |
| UPI000000 | -                       | -            |
| UPI000013 | -                       | hmmpanth 5   |
| UPI000013 | deleterious probably_c  | hmmpanth     |
| UPI000007 | -                       | -            |
| UPI000007 | -                       | 5            |
| UPI0001D3 | tolerated(C benign(0)   | hmmpanth     |
| UPI0001D3 | -                       | -            |
| UPI0001D3 | tolerated(C benign(0.0) | hmmpanth     |
| UPI0001D3 | -                       | hmmpanth     |
| UPI0001D3 | -                       | -            |
| UPI0001D3 | -                       | hmmpanth 2   |
| UPI000013 | tolerated(C probably_c  | hmmpanth     |
| UPI000020 | -                       | -            |
| UPI0001D5 | deleterious probably_c  | Pfam_dom     |
| UPI0001D5 | deleterious possibly_d  | hmmpanth     |
| UPI0001D5 | deleterious probably_c  | hmmpanth     |
| UPI000000 | -                       | -            |
| UPI00017E | deleterious probably_c  | PROSITE_p    |
| UPI00017E | tolerated_l benign(0)   | hmmpanth     |
| UPI000013 | -                       | Gene3D:1.1-  |
| UPI000013 | -                       | -            |
| UPI000013 | tolerated(C benign(0.0) | hmmpanth     |
| UPI000005 | deleterious probably_c  | Superfamily  |
| UPI000005 | -                       | Gene3D:2.1-  |
| UPI000006 | -                       | Superfamily  |
| UPI000000 | -                       | 3            |
| UPI000000 | -                       | -            |
| UPI000013 | -                       | hmmpanth     |
| UPI000003 | tolerated(C benign(0.0) | hmmpanth     |
| UPI000000 | -                       | -            |
| UPI000000 | -                       | hmmpanth     |
| UPI000003 | tolerated(C benign(0.0) | hmmpanth     |
| UPI000007 | -                       | Pfam_dom     |
| UPI000012 | deleterious probably_c  | PROSITE_p    |
| UPI000204 | -                       | Gene3D:1.1-  |
| UPI000204 | -                       | Gene3D:1.1-  |



|                       |             |                |
|-----------------------|-------------|----------------|
| UPI000204 -           | probably_d  | hmmpanth -     |
| UPI000204 -           | -           | hmmpanth -     |
| UPI000204 -           | possibly_d  | Gene3D:1.1 -   |
| UPI000204 -           | probably_d  | hmmpanth -     |
| UPI000204 -           | -           | Coiled-coils - |
| UPI000204 -           | benign(0.1) | hmmpanth -     |
| UPI000204 -           | -           | hmmpanth -     |
| UPI000204 -           | benign(0.1) | Gene3D:1.1 -   |
| UPI000204 -           | benign(0)   | hmmpanth -     |
| UPI000204 -           | benign(0.0) | Gene3D:1.1 -   |
| UPI000204 -           | -           | - -            |
| UPI000013 tolerated(C | benign(0)   | Low_comp -     |
| UPI000013 tolerated_I | benign(0.1) | PIRSF_dom -    |
| UPI000007 tolerated(C | benign(0.0) | Low_comp -     |
| UPI000013 tolerated(C | benign(0.0) | Gene3D:1h -    |
| UPI000013 -           | -           | - -            |
| UPI000013 -           | -           | Gene3D:1.1 -   |
| UPI000002 deleterious | possibly_d  | Gene3D:4.1 -   |
| UPI000002 deleterious | probably_d  | PROSITE_p -    |
| UPI000013 deleterious | benign(0.0) | hmmpanth -     |
| UPI000013 -           | -           | hmmpanth -     |
| UPI000013 deleterious | possibly_d  | hmmpanth -     |
| UPI00001D tolerated(C | benign(0.0) | hmmpanth -     |
| UPI00001D -           | -           | hmmpanth 3     |
| UPI000011 tolerated(C | benign(0.0) | hmmpanth -     |
| UPI00001F deleterious | probably_d  | Superfamil -   |
| UPI000002 -           | -           | - -            |
| UPI000046 deleterious | benign(0.2) | hmmpanth -     |
| UPI000046 -           | -           | Coiled-coils - |
| UPI000046 -           | -           | - -            |
| UPI000013 -           | -           | - -            |
| UPI000013 -           | -           | - -            |
| UPI000013 -           | -           | - -            |
| UPI000013 -           | -           | - -            |
| UPI000013 deleterious | possibly_d  | Coiled-coils - |
| UPI000045 -           | -           | - -            |
| UPI000045 tolerated(C | benign(0.0) | hmmpanth -     |
| UPI000045 -           | -           | hmmpanth -     |
| UPI000045 deleterious | probably_d  | hmmpanth -     |
| UPI000045 -           | -           | - -            |
| UPI000013 -           | -           | - -            |
| UPI000013 -           | -           | - -            |
| UPI000013 deleterious | probably_d  | Prints_dorr -  |
| UPI000013 -           | -           | Superfamil -   |
| UPI000012 deleterious | possibly_d  | hmmpanth -     |
| UPI000012 tolerated(C | benign(0.0) | Coiled-coils - |
| UPI000012 -           | -           | hmmpanth -     |

|                                   |          |              |
|-----------------------------------|----------|--------------|
| UPI000012 deleterious benign(0.2) | hmmpanth | -            |
| UPI000012                         | -        | -            |
| UPI000012                         | -        | hmmpanth     |
| UPI00001A                         | -        | -            |
| UPI000007                         | -        | PROSITE_p    |
| UPI000007                         | -        | -            |
| UPI000013                         | -        | Low_comp 3   |
| UPI000013                         | -        | -            |
| UPI000013                         | -        | -            |
| UPI000013 deleterious benign(0.2) | -        | -            |
| UPI00001A                         | -        | Coiled-coils |
| UPI00001A                         | -        | hmmpanth     |

EUR\_AF    SAS\_AF    AA\_AF    EA\_AF    gnomAD\_A gnomAD\_A gnomAD\_A gnomAD\_A gnomAD\_E

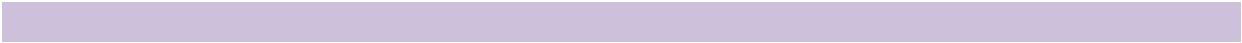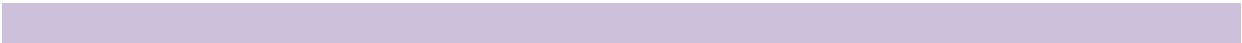

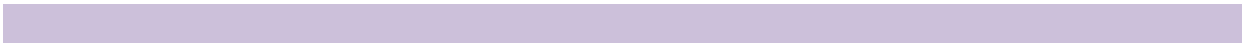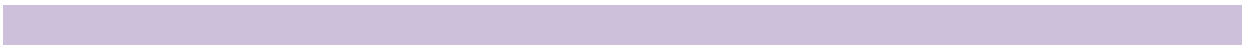

\_\_\_\_\_

\_\_\_\_\_

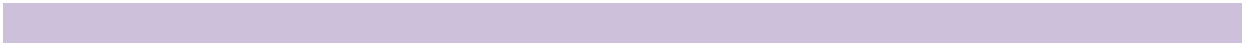







\_\_\_\_\_

\_\_\_\_\_

\_\_\_\_\_

\_\_\_\_\_

\_\_\_\_\_

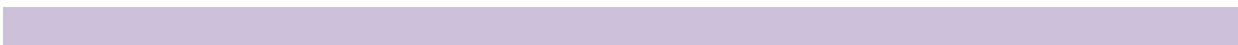

\_\_\_\_\_

\_\_\_\_\_

\_\_\_\_\_



[illegible]



[illegible]



[illegible]

[illegible]

[illegible]

[illegible]

[illegible]

[illegible]

|     |   |   |   |
|-----|---|---|---|
| 0 - | - | - | - |
| 0 - | - | - | - |
| 0 - | - | - | - |
| 0 - | - | - | - |
| 0 - | - | - | - |
| 0 - | - | - | - |
| 0 - | - | - | - |
| 0 - | - | - | - |
| 0 - | - | - | - |
| 0 - | - | - | - |
| 0 - | - | - | - |
| 0 - | - | - | - |
| 0 - | - | - | - |
| 0 - | - | - | - |
| 0 - | - | - | - |
| 0 - | - | - | - |
| 0 - | - | - | - |
| 0 - | - | - | - |
| 0 - | - | - | - |
| 0 - | - | - | - |
| 0 - | - | - | - |
| 0 - | - | - | - |
| 0 - | - | - | - |
| 0 - | - | - | - |
| 0 - | - | - | - |
| 0 - | - | - | - |
| 0 - | - | - | - |
| 0 - | - | - | - |
| 0 - | - | - | - |
| 0 - | - | - | - |
| 0 - | - | - | - |
| 0 - | - | - | - |
| 0 - | - | - | - |
| 0 - | - | - | - |
| 0 - | - | - | - |
| 0 - | - | - | - |
| 0 - | - | - | - |
| 0 - | - | - | - |
| 0 - | - | - | - |
| 0 - | - | - | - |
| 0 - | - | - | - |
| 0 - | - | - | - |
| 0 - | - | - | - |
| 0 - | - | - | - |
| 0 - | - | - | - |

[illegible]



[illegible]







[illegible]

[illegible]

[illegible]







[illegible]

[illegible]

| LoFtool | miRNA | BLOSUM62 | CADD_PHR | CADD_RAW  | Condel      | GTEX_V6p | GTEX_V6p | Interpro_d  |
|---------|-------|----------|----------|-----------|-------------|----------|----------|-------------|
| 0.0781  | -     | -        | 39       | 7.406226  | -           | -        | -        | Activin_typ |
| 0.85    | -     | -        | 3.862    | 0.075802  | -           | -        | -        | -           |
| 0.657   | -     | -        | 1.954    | -0.048597 | -           | -        | -        | -           |
| 0.657   | -     | -        | 0.115    | -0.462847 | -           | -        | -        | -           |
| 0.933   | -     | -2       | 25.8     | 3.677638  | deleterious | -        | -        | ELK_domai   |
| 0.933   | -     | -        | -        | -         | -           | -        | -        | -           |
| 0.933   | -     | -1       | 24.7     | 3.394578  | deleterious | -        | -        | -           |
| 0.933   | -     | -        | 9.341    | 0.495403  | -           | -        | -        | -           |
| 0.933   | -     | -        | -        | -         | -           | -        | -        | -           |
| 0.933   | -     | -2       | 22.8     | 2.605057  | deleterious | -        | -        | -           |
| 0.933   | -     | -1       | 9.977    | 0.566458  | neutral(0.2 | -        | -        | -           |
| 0.324   | -     | -1       | 22.8     | 2.627499  | neutral(0.0 | -        | -        | Protein_Kir |
| 0.341   | -     | -        | -        | -         | -           | -        | -        | -           |
| 0.202   | -     | -        | -        | -         | -           | -        | -        | -           |
| 0.00386 | -     | 3        | 22.9     | 2.629020  | neutral(0.0 | -        | -        | Armadillo-I |
| 0.00386 | -     | -        | -        | -         | -           | -        | -        | -           |
| 0.00386 | -     | -        | -        | -         | -           | -        | -        | -           |
| 0.00386 | -     | -        | -        | -         | -           | -        | -        | -           |
| 0.00386 | -     | -        | -        | -         | -           | -        | -        | -           |
| 0.0125  | -     | -        | -        | -         | -           | -        | -        | -           |
| 0.0215  | -     | -        | -        | -         | -           | -        | -        | -           |
| 0.0215  | -     | 3        | 27.3     | 3.924020  | deleterious | -        | -        | -           |
| 0.0215  | -     | -        | 35       | 6.027999  | -           | -        | -        | ARID_DNA    |
| 0.0215  | -     | -        | -        | -         | -           | -        | -        | -           |
| 0.0215  | -     | -2       | 32       | 4.243295  | deleterious | -        | -        | Armadillo-I |
| 0.259   | -     | -1       | 19.88    | 2.064992  | neutral(0.0 | -        | -        | -           |
| 0.54    | -     | -        | 14.16    | 1.148492  | -           | -        | -        | -           |
| 0.782   | -     | -        | -        | -         | -           | -        | -        | -           |
| 0.782   | -     | -        | 7.001    | 0.283820  | -           | -        | -        | -           |
| 0.782   | -     | -        | 15.00    | 1.317277  | -           | -        | -        | -           |
| 0.718   | -     | -        | -        | -         | -           | -        | -        | -           |
| 0.718   | -     | -        | 0.402    | -0.285761 | -           | -        | -        | -           |
| 0.718   | -     | -        | -        | -         | -           | -        | -        | -           |
| 0.718   | -     | 1        | 19.01    | 1.979767  | neutral(0.0 | -        | -        | Armadillo-I |
| 0.718   | -     | -        | 9.228    | 0.483378  | -           | -        | -        | -           |
| 0.718   | -     | -        | 1.225    | -0.119947 | -           | -        | -        | -           |
| 0.00517 | -     | -        | 34       | 4.525380  | -           | -        | -        | -           |
| 0.674   | -     | -        | -        | -         | -           | -        | -        | -           |
| 0.635   | -     | -        | 10.85    | 0.669733  | -           | -        | -        | -           |
| 0.907   | -     | -        | 10.43    | 0.619176  | -           | -        | -        | -           |
| 0.364   | -     | 1        | 22.8     | 2.583007  | neutral(0.0 | -        | -        | -           |
| 0.364   | -     | 1        | 22.0     | 2.306643  | neutral(0.2 | -        | -        | -           |
| 0.289   | -     | -        | 16.72    | 1.688332  | -           | -        | -        | -           |
| 0.289   | -     | -        | 16.05    | 1.553495  | -           | -        | -        | -           |
| 0.0194  | -     | -        | 18.87    | 1.965485  | -           | -        | -        | -           |

|           |         |            |       |           |              |   |             |
|-----------|---------|------------|-------|-----------|--------------|---|-------------|
| 0.155     | -       | -1         | 19.94 | 2.070122  | neutral(0.0- | - | -           |
| 0.25      | -       | -          | 37    | 7.053725  | -            | - | -           |
| 0.25      | -       | -          | 14.67 | 1.247520  | -            | - | -           |
| 0.509     | -       | 0          | 7.528 | 0.324729  | neutral(0.0- | - | -           |
| 0.509     | -       | -3         | 0.945 | -0.158338 | neutral(0.0- | - | -           |
| 0.509     | -       | -          | 4.924 | 0.140265  | -            | - | -           |
| 0.509     | -       | -1         | 17.75 | 1.838520  | neutral(0.3- | - | Zinc_finger |
| 0.509     | -       | 2          | 25.5  | 3.612242  | deleterious- | - | Zinc_finger |
| 0.889     | -       | -          | 10.03 | 0.571227  | -            | - | -           |
| 0.889     | -       | -          | 8.399 | 0.400995  | -            | - | -           |
| 0.959     | -       | 0          | 10.94 | 0.681812  | neutral(0.2- | - | Bloom_syn   |
| 0.959     | -       | 2          | 24.7  | 3.401847  | neutral(0.4- | - | HRDC_dom    |
| TA        | 0.0565  | AGAMMAC-   |       | 1.243     | -0.11783     | - | -           |
| 0.64      | -       | -          | 12.78 | 0.925681  | -            | - | -           |
| 0.64      | -       | -          | 1.466 | -0.093081 | -            | - | -           |
| 0.64      | -       | -          | 8.957 | 0.455416  | -            | - | -           |
| 0.251     | -       | 3          | 19.79 | 2.056444  | neutral(0.2- | - | -           |
| 0.729     | -       | 2          | 14.03 | 1.124374  | neutral(0.0- | - | -           |
| 0.729     | -       | -          | -     | -         | -            | - | -           |
| TT        | 0.302   | Noonan_sy- |       | 3.427     | 0.049922     | - | -           |
| 0.112     | -       | -          | 16.98 | 1.731263  | -            | - | -           |
| 0.112     | -       | -          | 0.729 | -0.196982 | -            | - | -           |
| 0.329     | -       | -          | 13.80 | 1.084741  | -            | - | -           |
| -         | -       | -          | 9.404 | 0.502186  | -            | - | -           |
| 0.499     | -       | -          | 6.275 | 0.230097  | -            | - | -           |
| 0.499     | -       | 2          | 15.67 | 1.468705  | neutral(0.0- | - | Cadherin_p  |
| 0.23      | -       | 1          | 23.4  | 2.901114  | neutral(0.0- | - | Cadherin,_  |
| 0.134     | -       | -2         | 22.1  | 2.339211  | neutral(0.3- | - | -           |
| 0.303     | -       | -          | -     | -         | -            | - | -           |
| -         | -       | -          | 21.0  | 2.162886  | -            | - | -           |
| 0.0161    | -       | -          | 10.93 | 0.679899  | -            | - | -           |
| 0.0161    | -       | -          | 23.0  | 2.699524  | -            | - | -           |
| CCCCAGgcc | 0.00406 | -          | -     | -         | -            | - | -           |
| 0.219     | -       | -1         | 22.3  | 2.405989  | neutral(0.3- | - | CULT_dom    |
| 0.219     | -       | -          | 9.094 | 0.469422  | -            | - | -           |
| 0.0011    | -       | -          | 10.84 | 0.668680  | -            | - | -           |
| 0.585     | -       | -          | -     | -         | -            | - | -           |
| 0.585     | -       | -          | -     | -         | -            | - | -           |
| 0.585     | -       | -          | 33    | 4.504386  | -            | - | -           |
| 0.585     | -       | -          | 3.665 | 0.064129  | -            | - | -           |
| 0.585     | -       | -          | 1.349 | -0.105685 | -            | - | -           |
| 0.34      | -       | 1          | 23.6  | 2.975696  | neutral(0.3- | - | -           |
| 0.34      | -       | -          | -     | -         | -            | - | -           |
| 0.208     | -       | 0          | 24.0  | 3.162167  | deleterious- | - | Armadillo-I |
| 0.923     | -       | 1          | 6.551 | 0.249920  | neutral(0.2- | - | -           |
| -         | -       | 0          | 15.68 | 1.469832  | neutral(0.3- | - | -           |
| 0.313     | -       | -2         | 22.2  | 2.375680  | neutral(0.0- | - | Immunogl    |

|          |   |                 |       |           |              |   |             |
|----------|---|-----------------|-------|-----------|--------------|---|-------------|
| 0.313    | - | -1              | 27.5  | 3.943797  | deleterious- | - | Immunogl    |
| 0.313    | - | -3              | 34    | 4.734982  | deleterious- | - | -           |
| 0.313    | - | -               | 6.121 | 0.219197  | -            | - | -           |
| 0.0426   | - | -               | 22.0  | 2.313914  | -            | - | -           |
| 0.0426   | - | -               | -     | -         | -            | - | -           |
| 0.0426   | - | 1               | 24.3  | 3.257354  | deleterious- | - | Protein_kir |
| 0.233    | - | -               | 11.03 | 0.692801  | -            | - | -           |
| 0.15     | - | -               | 14.93 | 1.302455  | -            | - | S-adenosyl  |
| 0.15     | - | -1              | 23.8  | 3.068783  | neutral(0.4- | - | -           |
| 0.11     | - | -               | 13.73 | 1.071748  | -            | - | -           |
| 0.11     | - | -               | 0.251 | -0.353513 | -            | - | -           |
| 0.11     | - | -               | 11.05 | 0.694998  | -            | - | -           |
| 0.11     | - | -               | 13.64 | 1.057698  | -            | - | -           |
| 0.554    | - | -2              | 27.6  | 3.956325  | deleterious- | - | -           |
| 0.554    | - | -3              | 32    | 4.273851  | deleterious- | - | -           |
| 0.554    | - | -               | 10.37 | 0.612156  | -            | - | -           |
| T        |   | 0.554 NEUROPAT- |       | 22.3      | 2.384179     | - | -           |
| 0.554    | - | -2              | 32    | 4.246285  | deleterious- | - | -           |
| 0.554    | - | -               | -     | -         | -            | - | -           |
| 0.554    | - | -               | 18.00 | 1.869520  | -            | - | -           |
| 0.554    | - | -               | -     | -         | -            | - | -           |
| 0.000482 | - | -               | -     | -         | -            | - | -           |
| 0.000482 | - | -               | 1.602 | -0.079592 | -            | - | -           |
| 0.00889  | - | -2              | 34    | 4.772741  | deleterious- | - | -           |
| 0.00889  | - | 1               | 17.89 | 1.856615  | neutral(0.2- | - | -           |
| 0.00889  | - | -               | 5.977 | 0.209217  | -            | - | -           |
| 0.00889  | - | -               | 7.223 | 0.300684  | -            | - | -           |
| 0.00889  | - | 2               | 28.5  | 4.047229  | deleterious- | - | -           |
| 0.00889  | - | -1              | 20.6  | 2.122317  | neutral(0.2- | - | -           |
| 0.291    | - | -               | 13.78 | 1.080875  | -            | - | -           |
| 0.291    | - | -               | 6.802 | 0.268680  | -            | - | -           |
| 0.291    | - | -1              | 22.3  | 2.394410  | neutral(0.0- | - | Ephrin_rec  |
| 0.223    | - | -               | 34    | 4.705756  | -            | - | -           |
| 0.223    | - | -               | 10.77 | 0.660535  | -            | - | -           |
| 0.223    | - | -               | 22.7  | 2.536341  | -            | - | -           |
| 0.19     | - | -               | 12.51 | 0.887231  | -            | - | -           |
| 0.149    | - | -               | 5.346 | 0.167281  | -            | - | -           |
| 0.149    | - | -               | 10.12 | 0.582008  | -            | - | -           |
| 0.149    | - | -               | 22.1  | 2.335405  | -            | - | -           |
| 0.31     | - | -               | 0.728 | -0.197352 | -            | - | -           |
| 0.147    | - | -               | 6.256 | 0.228688  | -            | - | -           |
| 0.147    | - | -               | 2.108 | -0.036405 | -            | - | -           |
| 0.147    | - | -               | 11.08 | 0.698708  | -            | - | -           |
| 0.0739   | - | -               | 10.84 | 0.668915  | -            | - | -           |
| -        | - | -               | 8.688 | 0.428553  | -            | - | -           |
| 0.868    | - | 0               | 15.91 | 1.522045  | neutral(0.0- | - | PEA3-type_  |
| 0.00765  | - | -1              | 29.7  | 4.156915  | deleterious- | - | Exostosin_  |

|         |        |             |       |           |              |   |   |             |
|---------|--------|-------------|-------|-----------|--------------|---|---|-------------|
| 0.00765 | -      | -           | 18.70 | 1.947023  | -            | - | - | -           |
| 0.0377  | -      | -           | -     | -         | -            | - | - | -           |
| 0.0135  | -      | -           | 5.465 | 0.174987  | -            | - | - | -           |
| -       | -      | -           | -     | -         | -            | - | - | -           |
| 0.0821  | -      | -           | 0.638 | -0.217210 | -            | - | - | -           |
| 0.0821  | -      | -           | 0.215 | -0.375976 | -            | - | - | -           |
| 0.989   | -      | -2          | 27.1  | 3.902580  | deleterious- | - | - | -           |
| 0.989   | -      | -           | -     | -         | -            | - | - | -           |
| 0.0141  | -      | -           | 1.818 | -0.059955 | -            | - | - | -           |
| 0.0563  | -      | -           | 38    | 7.225216  | -            | - | - | WD40-repe   |
| 0.00524 | -      | -           | 8.608 | 0.420816  | -            | - | - | -           |
| 0.00179 | -      | -2          | 32    | 4.342552  | deleterious- | - | - | Protein_kir |
| 0.0225  | -      | -           | -     | -         | -            | - | - | -           |
| 0.0225  | -      | -           | -     | -         | -            | - | - | -           |
| 0.0501  | -      | -           | 3.467 | 0.052311  | -            | - | - | -           |
| 0.218   | -      | -           | -     | -         | -            | - | - | -           |
| 0.0227  | -      | 1           | 12.18 | 0.842662  | neutral(0.0- | - | - | -           |
| 0.719   | -      | -           | 7.440 | 0.317651  | -            | - | - | -           |
| 0.719   | -      | 1           | 24.8  | 3.403721  | deleterious- | - | - | Fibronectin |
| 0.719   | -      | -           | 12.69 | 0.913562  | -            | - | - | -           |
| -       | -      | -2          | 25.6  | 3.640798  | deleterious- | - | - | -           |
| -       | -      | 1           | 14.60 | 1.233916  | neutral(0.0- | - | - | Fork_head_  |
| -       | 0.0611 | Mental_ret- | -     | -         | -            | - | - | -           |
| 0.0749  | -      | 0           | 32    | 4.301314  | deleterious- | - | - | Fork_head_  |
| 0.0431  | -      | -           | 0.660 | -0.212137 | -            | - | - | -           |
| -       | -      | -           | 12.45 | 0.879744  | -            | - | - | -           |
| 0.00834 | -      | -           | 21.7  | 2.256372  | -            | - | - | -           |
| 0.682   | -      | -           | 0.983 | -0.152403 | -            | - | - | -           |
| 0.471   | -      | -2          | 29.8  | 4.168297  | deleterious- | - | - | -           |
| 0.0879  | -      | -           | 4.803 | 0.132698  | -            | - | - | -           |
| 0.17    | -      | -           | -     | -         | -            | - | - | -           |
| 0.567   | -      | 2           | 22.8  | 2.627633  | neutral(0.3- | - | - | -           |
| 0.567   | -      | -           | 0.889 | -0.167359 | -            | - | - | -           |
| 0.307   | -      | -3          | 25.9  | 3.709981  | deleterious- | - | - | Isopropylm  |
| 0.107   | -      | -           | 4.558 | 0.117619  | -            | - | - | -           |
| 0.107   | -      | -           | 4.557 | 0.117545  | -            | - | - | -           |
| 0.339   | -      | -           | 7.126 | 0.293305  | -            | - | - | -           |
| 0.339   | -      | 1           | 17.05 | 1.743266  | neutral(0.0- | - | - | Mannose-6   |
| 0.698   | -      | -           | 11.91 | 0.805703  | -            | - | - | -           |
| 0.68    | -      | -           | 9.461 | 0.508429  | -            | - | - | -           |
| 0.442   | -      | 1           | 15.27 | 1.376163  | neutral(0.0- | - | - | -           |
| 0.442   | -      | 1           | 23.5  | 2.963806  | deleterious- | - | - | -           |
| 0.442   | -      | -           | -     | -         | -            | - | - | -           |
| 0.442   | -      | 1           | 22.9  | 2.652036  | neutral(0.0- | - | - | Fibronectin |
| 0.442   | -      | -           | 1.310 | -0.110062 | -            | - | - | -           |
| 0.136   | -      | -           | 8.649 | 0.424760  | -            | - | - | -           |
| -       | -      | -           | 12.05 | 0.825487  | -            | - | - | -           |

|         |   |             |       |           |              |   |   |             |
|---------|---|-------------|-------|-----------|--------------|---|---|-------------|
| 0.788   | - | -           | 34    | 4.792552  | -            | - | - | -           |
| 0.788   | - | -           | 17.26 | 1.774085  | -            | - | - | -           |
| 0.788   | - | -1          | 25.8  | 3.683552  | deleterious- | - | - | von_Willeb  |
| 0.788   | - | -           | -     | -         | -            | - | - | -           |
| 0.555   | - | -           | 34    | 4.735569  | -            | - | - | -           |
| 0.555   | - | -           | 3.487 | 0.053510  | -            | - | - | -           |
| 0.0333  | - | -           | -     | -         | -            | - | - | -           |
| 0.127   | - | -2          | 23.9  | 3.119135  | deleterious- | - | - | Integrin_be |
| 0.127   | - | -           | 5.928 | 0.205845  | -            | - | - | -           |
| 0.127   | - | -3          | 29.1  | 4.107675  | deleterious- | - | - | Integrin_be |
| 0.127   | - | 2           | 9.285 | 0.489452  | neutral(0.3- | - | - | Integrin_be |
| 0.189   | - | -           | -     | -         | -            | - | - | -           |
| 0.189   | - | -           | 18.02 | 1.871992  | -            | - | - | -           |
| -       | - | -           | -     | -         | -            | - | - | -           |
| T       | - | blepharopt- | -     | -         | -            | - | - | -           |
| -       | - | 2           | 22.9  | 2.658825  | neutral(0.1- | - | - | -           |
| -       | - | -           | -     | -         | -            | - | - | -           |
| -       | - | -2          | 25.6  | 3.628204  | deleterious- | - | - | Acyl-CoA_M  |
| -       | - | -2          | 24.6  | 3.353220  | deleterious- | - | - | Acyl-CoA_M  |
| 0.0636  | - | 1           | 21.2  | 2.185731  | neutral(0.0- | - | - | -           |
| 0.187   | - | -           | 9.465 | 0.508878  | -            | - | - | -           |
| 0.196   | - | -           | -     | -         | -            | - | - | -           |
| 0.196   | - | -1          | 22.1  | 2.320052  | neutral(0.3- | - | - | Immunoglc   |
| 0.196   | - | 0           | 26.0  | 3.714263  | deleterious- | - | - | Immunoglc   |
| 0.196   | - | -           | -     | -         | -            | - | - | -           |
| 0.303   | - | -1          | 27.8  | 3.983225  | deleterious- | - | - | Kelch-type_ |
| -       | - | 2           | 16.12 | 1.570001  | neutral(0.0- | - | - | -           |
| 0.19    | - | -           | -     | -         | -            | - | - | -           |
| 0.794   | - | 1           | 14.37 | 1.187971  | neutral(0.2- | - | - | -           |
| 0.794   | - | -           | 13.44 | 1.025156  | -            | - | - | -           |
| 0.794   | - | -           | 9.779 | 0.543742  | -            | - | - | -           |
| 0.794   | - | -           | 6.080 | 0.216398  | -            | - | - | -           |
| 0.794   | - | 1           | 16.18 | 1.581649  | neutral(0.0- | - | - | Fibronectin |
| 0.1     | - | -2          | 27.8  | 3.982775  | deleterious- | - | - | Olfactomec  |
| 0.1     | - | 2           | 29.4  | 4.131108  | deleterious- | - | - | GPCR,_fam   |
| 0.00916 | - | -           | 3.691 | 0.065654  | -            | - | - | -           |
| 0.00916 | - | -           | -     | -         | -            | - | - | -           |
| 0.00916 | - | -           | 7.501 | 0.322523  | -            | - | - | -           |
| 0.00916 | - | -           | 6.327 | 0.233782  | -            | - | - | -           |
| 0.00916 | - | 1           | 21.4  | 2.214939  | neutral(0.0- | - | - | Six-bladed_ |
| 0.00916 | - | -2          | 19.89 | 2.066164  | neutral(0.2- | - | - | Six-bladed_ |
| 0.00916 | - | -           | 14.54 | 1.222358  | -            | - | - | -           |
| 0.00916 | - | 1           | 22.2  | 2.353637  | deleterious- | - | - | Low-densit  |
| 0.00916 | - | -           | 9.974 | 0.566107  | -            | - | - | -           |
| 0.00916 | - | -           | 0.546 | -0.240307 | -            | - | - | -           |
| 0.00916 | - | -           | 17.08 | 1.746742  | -            | - | - | -           |
| 0.00916 | - | -           | -     | -         | -            | - | - | -           |



|         |   |                  |       |           |              |   |   |             |
|---------|---|------------------|-------|-----------|--------------|---|---|-------------|
| 0.943   | - | -                | 26.4  | 3.792239  | -            | - | - | -           |
| 0.519   | - | -                | 7.918 | 0.357593  | -            | - | - | -           |
| -       | - | 0                | 20.4  | 2.101275  | neutral(0.0- | - | - | -           |
| -       | - | -                | 10.03 | 0.571590  | -            | - | - | -           |
| -       | - | -1               | 26.5  | 3.808703  | deleterious- | - | - | -           |
| 0.0532  | - | 0                | 23.5  | 2.955567  | neutral(0.0- | - | - | Protein_kir |
| 0.503   | - | -                | -     | -         | -            | - | - | -           |
| 0.0914  | - | 3                | 24.2  | 3.211385  | neutral(0.3- | - | - | KA1_doma    |
| 0.881   | - | -                | 5.554 | 0.180810  | -            | - | - | -           |
| 0.0163  | - | -                | 9.155 | 0.475720  | -            | - | - | -           |
| -       | - | -3               | 28.5  | 4.051832  | deleterious- | - | - | Apoptosis_  |
| -       | - | -                | 7.137 | 0.294141  | -            | - | - | -           |
| 0.442   | - | 2                | 22.6  | 2.535191  | deleterious- | - | - | Sema_dom    |
| 0.442   | - | -2               | 24.2  | 3.210616  | deleterious- | - | - | IPT_domain  |
| 0.203   | - | -                | 14.72 | 1.258585  | -            | - | - | -           |
| 0.203   | - | -                | 3.594 | 0.059874  | -            | - | - | -           |
| 0.00165 | - | -2               | 31    | 4.201806  | deleterious- | - | - | DNA_mism    |
| -       | - | -1               | 23.6  | 2.979099  | deleterious- | - | - | -           |
| -       | - | 0                | 27.9  | 3.991116  | deleterious- | - | - | -           |
| -       | - | -                | -     | -         | -            | - | - | -           |
| -       | - | -                | 0.079 | -0.513979 | -            | - | - | -           |
| -       | - | -                | -     | -         | -            | - | - | -           |
| -       | - | -                | 9.015 | 0.461254  | -            | - | - | -           |
| -       | - | -                | 3.939 | 0.080365  | -            | - | - | -           |
| TT      | - | Intellectual-    | -     | -         | -            | - | - | -           |
| -       | - | 1                | 22.7  | 2.566067  | neutral(0.3- | - | - | -           |
| -       | - | -                | 3.826 | 0.073684  | -            | - | - | -           |
| -       | - | 0.336 Precursor_ | -     | -         | -            | - | - | -           |
| 0.336   | - | -                | 3.475 | 0.052780  | -            | - | - | -           |
| 0.336   | - | -                | 10.91 | 0.678125  | -            | - | - | -           |
| 0.343   | - | -                | 16.85 | 1.710423  | -            | - | - | -           |
| 0.343   | - | -                | 6.987 | 0.282799  | -            | - | - | -           |
| 0.21    | - | 2                | 23.8  | 3.088828  | deleterious- | - | - | Calcineurin |
| 0.00971 | - | -                | 36    | 6.503360  | -            | - | - | DNA_mism    |
| 0.00971 | - | -                | 0.191 | -0.392294 | -            | - | - | -           |
| 0.00971 | - | -1               | 24.5  | 3.325596  | neutral(0.4- | - | - | DNA_mism    |
| 0.00971 | - | -                | -     | -         | -            | - | - | -           |
| 0.246   | - | -                | 7.909 | 0.356795  | -            | - | - | -           |
| 0.507   | - | -2               | -     | -         | neutral(0.3- | - | - | -           |
| 0.507   | - | -                | 9.003 | 0.460082  | -            | - | - | -           |
| 0.507   | - | -                | 0.074 | -0.522855 | -            | - | - | -           |
| 0.507   | - | -2               | 29.5  | 4.137936  | deleterious- | - | - | Vitamin_B1  |
| -       | - | -                | -     | -         | -            | - | - | -           |
| -       | - | -                | 7.305 | 0.307075  | -            | - | - | -           |
| 0.0243  | - | -                | 35    | 5.707665  | -            | - | - | -           |
| -       | - | -                | -     | -         | -            | - | - | -           |
| -       | - | -                | 6.258 | 0.228872  | -            | - | - | -           |

|         |       |              |       |           |              |   |             |
|---------|-------|--------------|-------|-----------|--------------|---|-------------|
| -       | -     | -1           | 23.0  | 2.704582  | deleterious- | - | Transcripti |
| 0.0238  | -     | -            | 19.97 | 2.073351  | -            | - | -           |
| 0.00613 | -     | -1           | 22.5  | 2.450798  | neutral(0.0- | - | Myosin_tai  |
| 0.00613 | -     | -            | 5.592 | 0.183322  | -            | - | -           |
| 0.00606 | -     | -            | -     | -         | -            | - | -           |
| -       | -     | -            | 0.782 | -0.186567 | -            | - | -           |
| -       | -     | -1           | 29.5  | 4.135182  | deleterious- | - | Nuclear_re  |
| -       | -     | -            | 0.947 | -0.158037 | -            | - | -           |
| -       | -     | -2           | 22.7  | 2.554222  | deleterious- | - | -           |
| -       | -     | -3           | 23.8  | 3.076697  | deleterious- | - | -           |
| 0.729   | -     | 1            | 22.9  | 2.641645  | deleterious- | - | -           |
| 0.729   | -     | -            | -     | -         | -            | - | -           |
| 0.116   | -     | -            | 0.502 | -0.252733 | -            | - | -           |
| -       | 0.116 | Familial_sp- | -     | -         | -            | - | -           |
| 0.116   | -     | 1            | 23.7  | 3.049200  | neutral(0.4- | - | Armadillo-l |
| 0.199   | -     | -1           | 27.6  | 3.960079  | deleterious- | - | -           |
| 0.307   | -     | 0            | 14.81 | 1.276887  | neutral(0.0- | - | Ankyrin_re  |
| 0.307   | -     | -            | 5.720 | 0.191786  | -            | - | -           |
| 0.307   | -     | -1           | 21.7  | 2.251376  | neutral(0.0- | - | Ankyrin_re  |
| 0.307   | -     | -3           | 24.8  | 3.421374  | deleterious- | - | Ankyrin_re  |
| 0.18    | -     | -            | 12.28 | 0.856663  | -            | - | -           |
| 0.943   | -     | -1           | 22.7  | 2.538545  | deleterious- | - | -           |
| 0.943   | -     | -2           | 29.5  | 4.134348  | deleterious- | - | -           |
| 0.926   | -     | -2           | 13.34 | 1.008306  | neutral(0.0- | - | DAPIN_dor   |
| 0.0156  | -     | -            | 2.212 | -0.028634 | -            | - | -           |
| 0.0156  | -     | 1            | 21.6  | 2.232939  | neutral(0.3- | - | EGF-like_ca |
| 0.138   | -     | -            | 22.0  | 2.311136  | -            | - | -           |
| 0.138   | -     | -1           | 22.7  | 2.565874  | neutral(0.3- | - | -           |
| 0.00186 | -     | -3           | 7.774 | 0.345199  | neutral(0.0- | - | PWWP_dor    |
| 0.239   | -     | 1            | 24.8  | 3.423621  | deleterious- | - | Protein_kir |
| 0.0395  | -     | 0            | 25.6  | 3.637826  | deleterious- | - | Immunoglc   |
| 0.0394  | -     | 0            | 23.5  | 2.950345  | neutral(0.1- | - | -           |
| 0.247   | -     | -            | 18.92 | 1.971145  | -            | - | -           |
| 0.00393 | -     | -            | 14.17 | 1.150139  | -            | - | -           |
| 0.173   | -     | -            | 8.905 | 0.450156  | -            | - | -           |
| 0.0277  | -     | -            | 3.724 | 0.067609  | -            | - | -           |
| 0.00758 | -     | -1           | 22.7  | 2.542591  | neutral(0.1- | - | Homeobox    |
| 0.0745  | -     | -1           | 29.0  | 4.094349  | deleterious- | - | Bromo_adj   |
| 0.0745  | -     | -2           | 32    | 4.266889  | deleterious- | - | Bromo_adj   |
| 0.984   | -     | -            | 11.21 | 0.714842  | -            | - | -           |
| 0.984   | -     | 1            | 19.91 | 2.068006  | deleterious- | - | -           |
| 0.984   | -     | 3            | 18.90 | 1.968324  | neutral(0.0- | - | -           |
| 0.984   | -     | -            | 17.73 | 1.836965  | -            | - | -           |
| 0.984   | -     | -            | 35    | 6.029872  | -            | - | -           |
| 0.984   | -     | -2           | -     | -         | deleterious- | - | -           |
| 0.984   | -     | -2           | 29.3  | 4.121785  | deleterious- | - | -           |
| 0.984   | -     | -3           | 26.7  | 3.841075  | deleterious- | - | -           |

|          |   |    |       |           |              |   |             |
|----------|---|----|-------|-----------|--------------|---|-------------|
| 0.984    | - | -2 | 23.6  | 2.999948  | deleterious- | - | -           |
| 0.984    | - | -  | -     | -         | -            | - | -           |
| 0.984    | - | 0  | 25.1  | 3.509040  | deleterious- | - | -           |
| 0.984    | - | -3 | 27.4  | 3.931768  | deleterious- | - | -           |
| 0.984    | - | -  | 16.46 | 1.639154  | -            | - | -           |
| 0.984    | - | -  | 0.283 | -0.336353 | -            | - | -           |
| 0.984    | - | 1  | 24.0  | 3.145100  | neutral(0.4- | - | -           |
| 0.984    | - | -  | 11.73 | 0.782126  | -            | - | -           |
| 0.984    | - | -  | 13.89 | 1.100022  | -            | - | -           |
| 0.984    | - | -  | 22.1  | 2.339766  | -            | - | -           |
| 0.984    | - | 0  | 24.2  | 3.225818  | neutral(0.3- | - | Centrosom   |
| 0.984    | - | -2 | 33    | 4.348391  | deleterious- | - | Centrosom   |
| 0.984    | - | 1  | 26.1  | 3.743393  | deleterious- | - | Centrosom   |
| 0.125    | - | -  | 3.624 | 0.061688  | -            | - | -           |
| 0.125    | - | -1 | 15.96 | 1.533929  | neutral(0.0- | - | Immunoglc   |
| 0.123    | - | -  | 7.155 | 0.295555  | -            | - | -           |
| 0.123    | - | -3 | 21.8  | 2.262483  | neutral(0.2- | - | Immunoglc   |
| 0.55     | - | -  | -     | -         | -            | - | -           |
| 0.455    | - | -1 | 23.5  | 2.921353  | neutral(0.2- | - | -           |
| 0.268    | - | -  | 13.34 | 1.009527  | -            | - | -           |
| 0.268    | - | -  | -     | -         | -            | - | -           |
| 0.313    | - | -2 | 22.5  | 2.453366  | neutral(0.0- | - | Ubiquitin-r |
| 0.49     | - | -  | 2.599 | -0.001577 | -            | - | -           |
| 0.295    | - | -  | 40    | 7.633873  | -            | - | Phosphatid  |
| 0.295    | - | -  | 39    | 7.558851  | -            | - | PI3K_p85_?  |
| 0.00772  | - | -3 | 2.935 | 0.019984  | neutral(0.0- | - | -           |
| 0.00772  | - | -2 | 24.5  | 3.313009  | deleterious- | - | Pectin_lyas |
| 0.00772  | - | -  | 35    | 5.402483  | -            | - | -           |
| 0.00772  | - | 0  | 1.813 | -0.060414 | neutral(0.0- | - | -           |
| 0.00772  | - | -  | -     | -         | -            | - | -           |
| 0.00772  | - | 3  | 14.48 | 1.209674  | neutral(0.0- | - | -           |
| 0.0827   | - | -  | 2.237 | -0.026767 | -            | - | -           |
| 0.0827   | - | 1  | 16.18 | 1.582987  | neutral(0.0- | - | High_mobi   |
| 0.382    | - | -  | 0.258 | -0.349763 | -            | - | -           |
| 0.382    | - | -  | 41    | 7.841557  | -            | - | DNA_mism    |
| 0.382    | - | -  | 5.678 | 0.189001  | -            | - | -           |
| 0.832    | - | -  | 0.131 | -0.444509 | -            | - | -           |
| 0.0537   | - | -  | 0.516 | -0.248736 | -            | - | -           |
| -        | - | -  | 5.377 | 0.169296  | -            | - | -           |
| -        | - | -2 | 28.2  | 4.021655  | deleterious- | - | PIK-related |
| -        | - | -  | 9.229 | 0.483530  | -            | - | -           |
| -        | - | -  | 6.896 | 0.275833  | -            | - | -           |
| -        | - | -  | 5.897 | 0.203741  | -            | - | -           |
| 0.000344 | - | -2 | 25.7  | 3.648875  | deleterious- | - | -           |
| 0.000344 | - | -  | 3.141 | 0.032690  | -            | - | -           |
| -        | - | -  | 1.575 | -0.082245 | -            | - | -           |
| -        | - | -  | 23.5  | 2.931204  | -            | - | -           |

|          |   |    |       |           |              |   |   |             |
|----------|---|----|-------|-----------|--------------|---|---|-------------|
| 0.0482   | - | -  | -     | -         | -            | - | - | -           |
| 0.0868   | - | -  | -     | -         | -            | - | - | -           |
| 0.0868   | - | -  | 9.257 | 0.486494  | -            | - | - | -           |
| 0.0868   | - | 0  | 22.7  | 2.565591  | neutral(0.2- | - | - | Fibronectin |
| 0.0898   | - | -  | 3.980 | 0.082794  | -            | - | - | -           |
| 0.987    | - | -2 | 26.8  | 3.853747  | deleterious- | - | - | -           |
| 0.184    | - | -  | 21.1  | 2.177613  | -            | - | - | -           |
| 0.184    | - | -  | 47    | 8.606048  | -            | - | - | Protein_kir |
| 0.184    | - | -  | -     | -         | -            | - | - | -           |
| 0.515    | - | 1  | 24.4  | 3.278076  | deleterious- | - | - | Ras_guanir  |
| 0.0723   | - | -  | 5.141 | 0.154077  | -            | - | - | -           |
| 0.43     | - | -  | 3.057 | 0.027540  | -            | - | - | -           |
| 0.286    | - | -  | -     | -         | -            | - | - | -           |
| 0.286    | - | 2  | 29.1  | 4.105709  | deleterious- | - | - | -           |
| 0.223    | - | -  | 5.507 | 0.177746  | -            | - | - | -           |
| 0.223    | - | -  | -     | -         | -            | - | - | -           |
| 0.208    | - | 2  | 0.379 | -0.294293 | neutral(0.0- | - | - | -           |
| 0.208    | - | -  | 3.854 | 0.075321  | -            | - | - | -           |
| 0.208    | - | -2 | 5.790 | 0.196477  | neutral(0.3- | - | - | -           |
| 0.208    | - | -  | 35    | 5.110141  | -            | - | - | -           |
| 0.208    | - | -  | 5.113 | 0.152244  | -            | - | - | -           |
| 0.208    | - | -  | -     | -         | -            | - | - | -           |
| 0.134    | - | 2  | 23.0  | 2.701035  | deleterious- | - | - | -           |
| -        | - | -  | 3.880 | 0.076908  | -            | - | - | -           |
| 0.31     | - | -2 | 32    | 4.286540  | deleterious- | - | - | Zinc_finger |
| 0.31     | - | -2 | 28.6  | 4.059482  | deleterious- | - | - | -           |
| 0.31     | - | -3 | 28.5  | 4.047912  | deleterious- | - | - | -           |
| 0.432    | - | -  | 6.616 | 0.254695  | -            | - | - | -           |
| 0.0294   | - | -3 | 29.7  | 4.151683  | deleterious- | - | - | AWS_doma    |
| 0.0294   | - | 0  | 15.81 | 1.500287  | neutral(0.2- | - | - | -           |
| -        | - | -  | 12.16 | 0.840407  | -            | - | - | -           |
| 0.43     | - | -  | 8.602 | 0.420246  | -            | - | - | -           |
| 0.43     | - | -1 | 21.4  | 2.210603  | neutral(0.2- | - | - | Phox_homi   |
| 0.116    | - | 3  | 26.2  | 3.759026  | deleterious- | - | - | MAD_homi    |
| 0.116    | - | -  | 11.75 | 0.785729  | -            | - | - | -           |
| 0.000689 | - | -  | 10.16 | 0.586993  | -            | - | - | -           |
| -        | - | -  | -     | -         | -            | - | - | -           |
| -        | - | -  | 7.265 | 0.303968  | -            | - | - | -           |
| -        | - | -  | -     | -         | -            | - | - | -           |
| -        | - | 0  | 23.5  | 2.944635  | neutral(0.0- | - | - | -           |
| 0.0217   | - | -  | 4.082 | 0.088868  | -            | - | - | -           |
| 0.0217   | - | -  | 6.038 | 0.213436  | -            | - | - | -           |
| 0.886    | - | -3 | 13.15 | 0.980109  | neutral(0.3- | - | - | Armadillo-l |
| -        | - | -  | 12.47 | 0.881866  | -            | - | - | -           |
| 0.00792  | - | -1 | 26.0  | 3.719458  | deleterious- | - | - | SH2_doma    |
| 0.881    | - | -  | 8.632 | 0.423201  | -            | - | - | -           |
| 0.881    | - | -  | 57    | 9.847167  | -            | - | - | -           |

|          |          |           |       |           |              |   |   |             |
|----------|----------|-----------|-------|-----------|--------------|---|---|-------------|
| 0.881    | -        | 1         | 26.3  | 3.770044  | -            | - | - | -           |
| 0.881    | -        | -         | 7.620 | 0.332311  | -            | - | - | -           |
| 0.881    | -        | 2         | 23.9  | 3.118009  | -            | - | - | -           |
| 0.881    | -        | 0         | 26.9  | 3.874711  | -            | - | - | -           |
| 0.881    | -        | -         | 2.362 | -0.017757 | -            | - | - | -           |
| 0.881    | -        | 0         | 21.6  | 2.230064  | -            | - | - | -           |
| 0.881    | -        | -         | 0.143 | -0.433131 | -            | - | - | -           |
| 0.881    | -        | -1        | 16.65 | 1.676785  | -            | - | - | -           |
| 0.881    | -        | 1         | 16.22 | 1.591346  | -            | - | - | -           |
| 0.881    | -        | -3        | 22.8  | 2.589760  | -            | - | - | -           |
| 0.881    | -        | -         | 8.548 | 0.415087  | -            | - | - | -           |
| 0.152    | -        | 1         | 12.57 | 0.895578  | neutral(0.0- | - | - | -           |
| 0.152    | -        | -2        | 21.3  | 2.193336  | neutral(0.0- | - | - | -           |
| 0.582    | -        | -3        | 17.63 | 1.823622  | neutral(0.3- | - | - | Bromodom    |
| 0.0586   | -        | 0         | 5.445 | 0.173697  | neutral(0.0- | - | - | p53-like_tr |
| 0.497    | -        | -         | -     | -         | -            | - | - | -           |
| 0.118    | -        | -         | -     | -         | -            | - | - | -           |
| 0.0268   | -        | 1         | 23.6  | 3.002021  | deleterious- | - | - | CTNNB1_bi   |
| 0.0268   | -        | -1        | 26.5  | 3.818797  | deleterious- | - | - | CTNNB1_bi   |
| 0.247    | -        | 1         | 22.8  | 2.590147  | neutral(0.4- | - | - | -           |
| 0.247    | -        | -         | 6.859 | 0.273003  | -            | - | - | -           |
| 0.247    | -        | -3        | 26.6  | 3.820431  | deleterious- | - | - | -           |
| 0.998    | -        | -2        | 13.74 | 1.074132  | neutral(0.3- | - | - | -           |
| 0.998    | -        | -         | -     | -         | -            | - | - | -           |
| 0.192    | -        | 0         | 18.56 | 1.932384  | neutral(0.0- | - | - | -           |
| 0.104    | -        | 0         | 23.4  | 2.882177  | deleterious- | - | - | -           |
| C        | 0.000965 | ADRENOCC- | -     | -         | -            | - | - | -           |
| 0.361    | -        | 1         | 23.4  | 2.897938  | neutral(0.3- | - | - | -           |
| 0.361    | -        | -         | 11.81 | 0.793127  | -            | - | - | -           |
| 0.361    | -        | -         | -     | -         | -            | - | - | -           |
| 0.028    | -        | -         | 16.25 | 1.598130  | -            | - | - | -           |
| 0.028    | -        | -         | 16.32 | 1.612783  | -            | - | - | -           |
| 0.9      | -        | -         | -     | -         | -            | - | - | -           |
| 0.9      | -        | -         | 4.369 | 0.106133  | -            | - | - | -           |
| 0.9      | -        | 1         | 23.6  | 2.970558  | deleterious- | - | - | -           |
| 0.0406   | -        | -         | 17.56 | 1.814685  | -            | - | - | -           |
| 0.0406   | -        | 2         | 18.37 | 1.911581  | neutral(0.0- | - | - | Armadillo-l |
| 0.0406   | -        | -         | 43    | 8.183281  | -            | - | - | Armadillo-l |
| 0.0406   | -        | 0         | 28.8  | 4.075952  | deleterious- | - | - | Armadillo-l |
| 0.0406   | -        | -         | 0.790 | -0.184942 | -            | - | - | -           |
| 0.000276 | -        | -         | -     | -         | -            | - | - | -           |
| 0.272    | -        | -         | 4.415 | 0.108894  | -            | - | - | -           |
| 0.272    | -        | -2        | 26.7  | 3.841200  | deleterious- | - | - | Leucine-ric |
| 0.272    | -        | -         | 16.87 | 1.713805  | -            | - | - | -           |
| 0.0612   | -        | 1         | 32    | 4.240419  | deleterious- | - | - | HECT_dom    |
| 0.0612   | -        | 1         | 21.7  | 2.248015  | neutral(0.0- | - | - | -           |
| 0.0612   | -        | -         | 12.38 | 0.870098  | -            | - | - | -           |

|         |   |    |       |           |              |   |          |
|---------|---|----|-------|-----------|--------------|---|----------|
| 0.0612  | - | 1  | 23.6  | 3.002175  | neutral(0.4- | - | -        |
| 0.0612  | - | -  | -     | -         | -            | - | -        |
| 0.0612  | - | -  | 10.76 | 0.658659  | -            | - | -        |
| -       | - | -  | 12.56 | 0.895252  | -            | - | -        |
| 0.00276 | - | -  | 38    | 7.200462  | -            | - | AWS_domæ |
| 0.00276 | - | -  | 12.54 | 0.891654  | -            | - | -        |
| 0.00276 | - | -  | 13.54 | 1.041425  | -            | - | -        |
| 0.00276 | - | -  | -     | -         | -            | - | -        |
| 0.00276 | - | -  | 12.68 | 0.911763  | -            | - | -        |
| 0.988   | - | -  | -     | -         | -            | - | -        |
| 0.988   | - | -  | 0.333 | -0.312875 | -            | - | -        |
| 0.988   | - | -  | 8.520 | 0.412391  | -            | - | -        |
| 0.988   | - | -3 | 8.988 | 0.458480  | neutral(0.4- | - | -        |
| 0.197   | - | -  | -     | -         | -            | - | -        |
| 0.197   | - | -  | 9.900 | 0.557496  | -            | - | -        |



|   |   |   |   |   |              |         |           |    |
|---|---|---|---|---|--------------|---------|-----------|----|
| - | - | - | - | 0 | -            | G       | 0.1769168 | NR |
| - | - | - | - | 0 | -            | C       | -         | NR |
| - | - | - | - | - | -            | A       | -         | NR |
| - | - | - | - | 0 | MALT_lym     | A       | 0.2731034 | NR |
| - | - | - | - | 0 | -            | G       | 0.4682574 | NR |
| - | - | - | - | - | -            | T       | -         | NR |
| - | - | - | - | 0 | -            | C       | 0.6778984 | NR |
| - | - | - | - | 2 | -            | A       | 0.6207210 | NR |
| - | - | - | - | - | -            | G       | -         | NR |
| - | - | - | - | - | -            | C       | -         | NR |
| - | - | - | - | 2 | -            | A       | 0.1092634 | NR |
| - | - | - | - | 0 | -            | C       | 0.4957713 | NR |
| - | - | - | - | - | -            | -       | -         | NR |
| - | - | - | - | - | FANCONI_     | T       | -         | NR |
| - | - | - | - | - | -            | G       | -         | NR |
| - | - | - | - | - | -            | T       | -         | NR |
| - | - | - | - | 0 | -            | T       | 0.5194465 | NR |
| - | - | - | - | 2 | -            | G       | 0.0745868 | NR |
| - | - | - | - | - | -            | TTTT    | -         | NR |
| - | - | - | - | - | -            | -       | -         | NR |
| - | - | - | - | - | HYPERPAR     | A       | -         | NR |
| - | - | - | - | - | -            | g       | -         | NR |
| - | - | - | - | - | -            | C       | -         | NR |
| - | - | - | - | - | -            | T       | -         | NR |
| - | - | - | - | - | -            | G       | -         | NR |
| - | - | - | - | 2 | -            | C       | 0.2701084 | NR |
| - | - | - | - | 0 | -            | G       | 0.3653853 | NR |
| - | - | - | - | 0 | -            | T       | 1.2840433 | NR |
| - | - | - | - | - | MELANOM      | AGG     | -         | NR |
| - | - | - | - | - | -            | T       | -         | NR |
| - | - | - | - | - | CAPICUA_     | C       | -         | NR |
| - | - | - | - | - | -            | A       | -         | NR |
| - | - | - | - | - | -            | -       | -         | NR |
| - | - | - | - | 2 | -            | A       | 0.0989413 | NR |
| - | - | - | - | - | -            | C       | -         | NR |
| - | - | - | - | - | -            | T       | -         | NR |
| - | - | - | - | - | -            | -----Cg | -         | NR |
| - | - | - | - | - | -            | ATT     | -         | NR |
| - | - | - | - | - | -            | T       | -         | NR |
| - | - | - | - | - | -            | A       | -         | NR |
| - | - | - | - | - | -            | T       | -         | NR |
| - | - | - | - | 0 | -            | A       | 1.3629024 | NR |
| - | - | - | - | - | Butterfly-sl | AGA     | -         | NR |
| - | - | - | - | 2 | -            | C       | 2.2137141 | NR |
| - | - | - | - | 0 | -            | A       | 0.0059104 | NR |
| - | - | - | - | 0 | -            | C       | 0.1638847 | NR |
| - | - | - | - | 0 | -            | T       | 0.2893329 | NR |



|   |   |   |   |   |               |        |           |    |
|---|---|---|---|---|---------------|--------|-----------|----|
| - | - | - | - | 0 | -             | G      | 0.7372215 | NR |
| - | - | - | - | 0 | -             | G      | 0.7217725 | NR |
| - | - | - | - | - | -             | A      | -         | NR |
| - | - | - | - | - | -             | A      | -         | NR |
| - | - | - | - | - | SPONDYLO      | GC     | -         | NR |
| - | - | - | - | 0 | -             | G      | 0.9148740 | NR |
| - | - | - | - | - | -             | G      | -         | NR |
| - | - | - | - | 2 | Overgrowth    | T      | -         | NR |
| - | - | - | - | 0 | -             | G      | 0.9638527 | NR |
| - | - | - | - | - | -             | T      | -         | NR |
| - | - | - | - | - | -             | A      | -         | NR |
| - | - | - | - | - | -             | A      | -         | NR |
| - | - | - | - | - | -             | C      | -         | NR |
| - | - | - | - | 0 | -             | T      | 1.3485295 | NR |
| - | - | - | - | 0 | -             | A      | 1.5162887 | NR |
| - | - | - | - | - | -             | A      | -         | NR |
| - | - | - | - | - | 0 neutral(0.4 | -1     | 0.167898  | NR |
| - | - | - | - | 0 | -             | A      | 0.6866158 | NR |
| - | - | - | - | - | -             | AAA    | -         | NR |
| - | - | - | - | - | -             | G      | -         | NR |
| - | - | - | - | - | -             | TTACTC | -         | NR |
| - | - | - | - | - | RUBINSTEI     | T      | -         | NR |
| - | - | - | - | - | -             | T      | -         | NR |
| - | - | - | - | 0 | -             | G      | 0.1804570 | NR |
| - | - | - | - | 0 | -             | G      | 0.4499171 | NR |
| - | - | - | - | - | -             | C      | -         | NR |
| - | - | - | - | - | -             | A      | -         | NR |
| - | - | - | - | 0 | -             | A      | 0.3657255 | NR |
| - | - | - | - | 0 | -             | A      | 1.5168048 | NR |
| - | - | - | - | - | -             | T      | -         | NR |
| - | - | - | - | - | -             | T      | -         | NR |
| - | - | - | - | 0 | -             | A      | 0.2473641 | NR |
| - | - | - | - | - | -             | T      | -         | NR |
| - | - | - | - | - | -             | T      | -         | NR |
| - | - | - | - | - | -             | T      | -         | NR |
| - | - | - | - | - | -             | C      | -         | NR |
| - | - | - | - | - | -             | G      | -         | NR |
| - | - | - | - | - | -             | G      | -         | NR |
| - | - | - | - | - | -             | C      | -         | NR |
| - | - | - | - | - | -             | C      | -         | NR |
| - | - | - | - | - | -             | G      | -         | NR |
| - | - | - | - | - | -             | G      | -         | NR |
| - | - | - | - | - | -             | G      | -         | NR |
| - | - | - | - | - | -             | t      | -         | NR |
| - | - | - | - | - | -             | G      | -         | NR |
| - | - | - | - | 2 | -             | C      | 0.3247939 | NR |
| - | - | - | - | 0 | -             | T      | 1.1959237 | NR |

|   |   |   |   |   |              |           |    |
|---|---|---|---|---|--------------|-----------|----|
| - | - | - | - | - | G            | -         | NR |
| - | - | - | - | - | Exostoses_A  | -         | NR |
| - | - | - | - | - | T            | -         | NR |
| - | - | - | - | - | OSTEOPATI-   | -         | NR |
| - | - | - | - | - | G            | -         | NR |
| - | - | - | - | - | C            | -         | NR |
| - | - | - | - | 0 | a            | 0.5695223 | NR |
| - | - | - | - | - | FANCONI_A    | -         | NR |
| - | - | - | - | - | T            | -         | NR |
| - | - | - | - | 0 | C            | -         | NR |
| - | - | - | - | - | EncephalocT  | -         | NR |
| - | - | - | - | 0 | T            | 1.9310558 | NR |
| - | - | - | - | - | ACHONDROC    | -         | NR |
| - | - | - | - | - | c            | -         | NR |
| - | - | - | - | - | G            | -         | NR |
| - | - | - | - | - | CT           | -         | NR |
| - | - | - | - | 0 | C            | 0.1145077 | NR |
| - | - | - | - | - | A            | -         | NR |
| - | - | - | - | 2 | G            | 0.9135416 | NR |
| - | - | - | - | - | C            | -         | NR |
| - | - | - | - | 0 | A            | 1.0181911 | NR |
| - | - | - | - | 0 | A            | -         | NR |
| - | - | - | - | - | -            | -         | NR |
| - | - | - | - | 0 | C            | 2.2043923 | NR |
| - | - | - | - | - | C            | -         | NR |
| - | - | - | - | - | G            | -         | NR |
| - | - | - | - | - | C            | -         | NR |
| - | - | - | - | - | C            | -         | NR |
| - | - | - | - | 0 | G            | 1.2823345 | NR |
| - | - | - | - | - | g            | -         | NR |
| - | - | - | - | - | TTTTTT       | -         | NR |
| - | - | - | - | 2 | .            | -         | NR |
| - | - | - | - | - | .            | -         | NR |
| - | - | - | - | 0 | C            | 1.1614020 | NR |
| - | - | - | - | - | INSULIN-LIIA | -         | NR |
| - | - | - | - | - | G            | -         | NR |
| - | - | - | - | - | A            | -         | NR |
| - | - | - | - | 0 | A            | 0.4566986 | NR |
| - | - | - | - | - | T            | -         | NR |
| - | - | - | - | - | A            | -         | NR |
| - | - | - | - | 0 | A            | 0.1014807 | NR |
| - | - | - | - | 0 | C            | 0.3698293 | NR |
| - | - | - | - | - | GAAA         | -         | NR |
| - | - | - | - | 0 | C            | 0.1605978 | NR |
| - | - | - | - | - | T            | -         | NR |
| - | - | - | - | - | C            | -         | NR |
| - | - | - | - | - | .            | -         | NR |

|   |   |   |   |   |   |               |           |    |
|---|---|---|---|---|---|---------------|-----------|----|
| - | - | - | - | 0 | - | G             | -         | NR |
| - | - | - | - | - | - | G             | -         | NR |
| - | - | - | - | 0 | - | C             | 0.7427756 | NR |
| - | - | - | - | - | - | C             | -         | NR |
| - | - | - | - | - | - | A             | -         | NR |
| - | - | - | - | - | - | C             | -         | NR |
| - | - | - | - | - | - | LEUKOCYTE-    | -         | NR |
| - | - | - | - | 0 | - | C             | 1.0143853 | NR |
| - | - | - | - | - | - | G             | -         | NR |
| - | - | - | - | 0 | - | T             | 1.6734562 | NR |
| - | - | - | - | 2 | - | C             | 0.6795728 | NR |
| - | - | - | - | - | - | BUDD-CHIACT   | -         | NR |
| - | - | - | - | - | - | A             | -         | NR |
| - | - | - | - | - | - | MENTAL_R-     | -         | NR |
| - | - | - | - | - | - | -             | -         | NR |
| - | - | - | - | 0 | - | T             | 0.6413880 | NR |
| - | - | - | - | - | - | blepharopht A | -         | NR |
| - | - | - | - | 0 | - | A             | 2.0894183 | NR |
| - | - | - | - | 0 | - | A             | 1.3614556 | NR |
| - | - | - | - | 0 | - | C             | 1.3134170 | NR |
| - | - | - | - | - | - | T             | -         | NR |
| - | - | - | - | - | - | CA            | -         | NR |
| - | - | - | - | 0 | - | T             | 0.1914086 | NR |
| - | - | - | - | 2 | - | C             | 0.2259192 | NR |
| - | - | - | - | - | - | HEMANGIC-     | -         | NR |
| - | - | - | - | 0 | - | G             | 2.1456674 | NR |
| - | - | - | - | 0 | - | Gastric_carT  | 1.7162338 | NR |
| - | - | - | - | - | - | CARDIOFAC-    | -         | NR |
| - | - | - | - | 0 | - | Stuve-WiecT   | 0.0896114 | NR |
| - | - | - | - | - | - | G             | -         | NR |
| - | - | - | - | - | - | A             | -         | NR |
| - | - | - | - | - | - | G             | -         | NR |
| - | - | - | - | 0 | - | G             | 0.0776255 | NR |
| - | - | - | - | 0 | - | A             | 1.1262604 | NR |
| - | - | - | - | 2 | - | C             | 0.8299129 | NR |
| - | - | - | - | - | - | T             | -         | NR |
| - | - | - | - | - | - | AT            | -         | NR |
| - | - | - | - | - | - | C             | -         | NR |
| - | - | - | - | - | - | T             | -         | NR |
| - | - | - | - | 0 | - | C             | 0.2585019 | NR |
| - | - | - | - | 0 | - | A             | 0.7189395 | NR |
| - | - | - | - | - | - | A             | -         | NR |
| - | - | - | - | 2 | - | A             | 0.7103614 | NR |
| - | - | - | - | - | - | C             | -         | NR |
| - | - | - | - | - | - | G             | -         | NR |
| - | - | - | - | - | - | A             | -         | NR |
| - | - | - | - | - | - | GG            | -         | NR |



|   |   |   |   |   |           |    |           |    |
|---|---|---|---|---|-----------|----|-----------|----|
| - | - | - | - | 2 | -         | C  | 1.6806760 | NR |
| - | - | - | - | - | -         | G  | -         | NR |
| - | - | - | - | 0 | -         | A  | 0.3338483 | NR |
| - | - | - | - | - | -         | G  | -         | NR |
| - | - | - | - | - | DEAFNESS_ | GT | -         | NR |
| - | - | - | - | - | -         | C  | -         | NR |
| - | - | - | - | 0 | -         | T  | 0.5413976 | NR |
| - | - | - | - | - | -         | A  | -         | NR |
| - | - | - | - | 2 | -         | G  | 2.3080619 | NR |
| - | - | - | - | 0 | -         | A  | 2.3684937 | NR |
| - | - | - | - | 0 | -         | .  | 0.1924514 | NR |
| - | - | - | - | - | THYROID_  | C  | -         | NR |
| - | - | - | - | - | -         | G  | -         | NR |
| - | - | - | - | - | -         | -  | -         | NR |
| - | - | - | - | 2 | -         | T  | 1.3981076 | NR |
| - | - | - | - | 0 | -         | A  | 0.2201344 | NR |
| - | - | - | - | 2 | -         | T  | 0.4513656 | NR |
| - | - | - | - | - | -         | C  | -         | NR |
| - | - | - | - | 0 | -         | C  | 0.4830688 | NR |
| - | - | - | - | 0 | -         | G  | 0.5458653 | NR |
| - | - | - | - | - | Common_   | C  | -         | NR |
| - | - | - | - | 0 | -         | C  | 0.4693517 | NR |
| - | - | - | - | 2 | -         | T  | 0.6482529 | NR |
| - | - | - | - | 0 | -         | T  | 0.2903945 | NR |
| - | - | - | - | - | -         | G  | -         | NR |
| - | - | - | - | 0 | -         | G  | 1.4443601 | NR |
| - | - | - | - | - | -         | G  | -         | NR |
| - | - | - | - | 0 | -         | G  | 1.6277975 | NR |
| - | - | - | - | 0 | -         | T  | 0.0907135 | NR |
| - | - | - | - | 0 | -         | G  | 0.3222460 | NR |
| - | - | - | - | 0 | -         | G  | 0.8365473 | NR |
| - | - | - | - | 0 | -         | G  | 0.5017323 | NR |
| - | - | - | - | - | -         | A  | -         | NR |
| - | - | - | - | - | -         | T  | -         | NR |
| - | - | - | - | - | -         | g  | -         | NR |
| - | - | - | - | - | -         | C  | -         | NR |
| - | - | - | - | 0 | -         | C  | 0.8428833 | NR |
| - | - | - | - | 0 | -         | A  | 1.1870528 | NR |
| - | - | - | - | 0 | -         | A  | 1.4622042 | NR |
| - | - | - | - | - | -         | .  | -         | NR |
| - | - | - | - | 0 | -         | .  | -         | NR |
| - | - | - | - | 0 | -         | .  | -         | NR |
| - | - | - | - | - | -         | .  | -         | NR |
| - | - | - | - | 0 | -         | .  | -         | NR |
| - | - | - | - | - | -         | .. | -         | NR |
| - | - | - | - | 0 | -         | .  | -         | NR |
| - | - | - | - | 0 | -         | .  | -         | NR |



|   |   |   |   |   |             |           |    |
|---|---|---|---|---|-------------|-----------|----|
| - | - | - | - | - | LEOPARD_    | -         | NR |
| - | - | - | - | - | A           | -         | NR |
| - | - | - | - | - | A           | -         | NR |
| - | - | - | - | 0 | C           | -         | NR |
| - | - | - | - | - | T           | -         | NR |
| - | - | - | - | 0 | C           | 0.7868148 | NR |
| - | - | - | - | - | C           | -         | NR |
| - | - | - | - | 2 | G           | -         | NR |
| - | - | - | - | - | NOONAN_     | -         | NR |
| - | - | - | - | 0 | C           | 0.2981488 | NR |
| - | - | - | - | - | T           | -         | NR |
| - | - | - | - | - | G           | -         | NR |
| - | - | - | - | - | A           | -         | NR |
| - | - | - | - | 0 | A           | 1.5441570 | NR |
| - | - | - | - | - | T           | -         | NR |
| - | - | - | - | - | T           | -         | NR |
| - | - | - | - | 2 | A           | 0.3205994 | NR |
| - | - | - | - | - | T           | -         | NR |
| - | - | - | - | 0 | a           | 0.3843406 | NR |
| - | - | - | - | 0 | C           | -         | NR |
| - | - | - | - | - | A           | -         | NR |
| - | - | - | - | - | MOYAMOY-    | -         | NR |
| - | - | - | - | 2 | T           | 0.0255764 | NR |
| - | - | - | - | - | C           | -         | NR |
| - | - | - | - | 2 | Colorectal_ | 2.0327957 | NR |
| - | - | - | - | 0 | G           | 1.2888031 | NR |
| - | - | - | - | 0 | C           | 2.2975458 | NR |
| - | - | - | - | - | T           | -         | NR |
| - | - | - | - | 2 | G           | 2.6048549 | NR |
| - | - | - | - | 0 | A           | 0.3306858 | NR |
| - | - | - | - | - | T           | -         | NR |
| - | - | - | - | - | C           | -         | NR |
| - | - | - | - | 0 | G           | 0.0424580 | NR |
| - | - | - | - | 0 | Juvenile_   | 2.6732094 | NR |
| - | - | - | - | - | T           | -         | NR |
| - | - | - | - | - | C           | -         | NR |
| - | - | - | - | - | COFFIN_     | -         | NR |
| - | - | - | - | - | T           | -         | NR |
| - | - | - | - | - | MENTAL_     | -         | NR |
| - | - | - | - | 0 | T           | 1.4487529 | NR |
| - | - | - | - | - | C           | -         | NR |
| - | - | - | - | - | C           | -         | NR |
| - | - | - | - | 0 | C           | 0.3118358 | NR |
| - | - | - | - | - | C           | -         | NR |
| - | - | - | - | 0 | C           | 0.7632342 | NR |
| - | - | - | - | - | G           | -         | NR |
| - | - | - | - | 0 | G           | -         | NR |

|   |   |   |   |   |            |           |    |
|---|---|---|---|---|------------|-----------|----|
| - | - | - | 0 | - | T          | 0.5470817 | NR |
| - | - | - | - | - | G          | -         | NR |
| - | - | - | 0 | - | G          | 0.1943807 | NR |
| - | - | - | 0 | - | G          | 0.6304281 | NR |
| - | - | - | - | - | Emery-Drei | -         | NR |
| - | - | - | 2 | - | C          | 0.4273184 | NR |
| - | - | - | - | - | C          | -         | NR |
| - | - | - | 2 | - | A          | 0.2046020 | NR |
| - | - | - | 0 | - | T          | 0.1034632 | NR |
| - | - | - | 0 | - | C          | 0.2396578 | NR |
| - | - | - | - | - | A          | -         | NR |
| - | - | - | 0 | - | G          | 0.7347409 | NR |
| - | - | - | 0 | - | c          | 0.5276987 | NR |
| - | - | - | 0 | - | G          | 0.2871464 | NR |
| - | - | - | 0 | - | Cleft_pal  | 0.1694729 | NR |
| - | - | - | - | - | -          | -         | NR |
| - | - | - | - | - | GAGG       | -         | NR |
| - | - | - | 0 | - | DIABETES_  | -         | NR |
| - | - | - | 0 | - | c          | 2.5626962 | NR |
| - | - | - | 0 | - | A          | 0.1081536 | NR |
| - | - | - | - | - | C          | -         | NR |
| - | - | - | 0 | - | T          | 1.2535165 | NR |
| - | - | - | 0 | - | A          | 0.0702743 | NR |
| - | - | - | - | - | MYELOYST   | -         | NR |
| - | - | - | 0 | - | C          | 0.8869098 | NR |
| - | - | - | 2 | - | G          | 1.2511757 | NR |
| - | - | - | - | - | -          | -         | NR |
| - | - | - | 0 | - | A          | 0.3481558 | NR |
| - | - | - | - | - | A          | -         | NR |
| - | - | - | - | - | THYROID_(- | -         | NR |
| - | - | - | - | - | THYROID_(G | -         | NR |
| - | - | - | - | - | C          | -         | NR |
| - | - | - | - | - | Achondrog  | -         | NR |
| - | - | - | - | - | a          | -         | NR |
| - | - | - | 0 | - | c          | 0.2470957 | NR |
| - | - | - | - | - | A          | -         | NR |
| - | - | - | 2 | - | A          | 0.8519863 | NR |
| - | - | - | 2 | - | C          | -         | NR |
| - | - | - | 0 | - | C          | 2.0305426 | NR |
| - | - | - | - | - | C          | -         | NR |
| - | - | - | - | - | LYMPHAN(-  | -         | NR |
| - | - | - | - | - | T          | -         | NR |
| - | - | - | 0 | - | T          | 0.7996643 | NR |
| - | - | - | - | - | G          | -         | NR |
| - | - | - | 0 | - | C          | 1.6118683 | NR |
| - | - | - | 0 | - | T          | 0.9600627 | NR |
| - | - | - | - | - | T          | -         | NR |



|   |   |   |   |   |   |                |            |    |
|---|---|---|---|---|---|----------------|------------|----|
| - | - | - | - | 0 | - | T              | 1.1360345' | NR |
| - | - | - | - | - | - | T              | -          | NR |
| - | - | - | - | - | - | G              | -          | NR |
| - | - | - | - | - | - | A              | -          | NR |
| - | - | - | - | 0 | - | C              | -          | NR |
| - | - | - | - | - | - | T              | -          | NR |
| - | - | - | - | - | - | C              | -          | NR |
| - | - | - | - | - | - | Wolf-Hirschman | -          | NR |
| - | - | - | - | - | - | C              | -          | NR |
| - | - | - | - | - | - | Colorectal_T   | -          | NR |
| - | - | - | - | - | - | A              | -          | NR |
| - | - | - | - | - | - | T              | -          | NR |
| - | - | - | - | 0 | - | WERNER_Sg      | 0.1420064' | NR |
| - | - | - | - | - | - | C              | -          | NR |
| - | - | - | - | - | - | T              | -          | NR |

| all_pathogenic | pathogenic | large_intes | all_somatic | Somatic | SNP             |
|----------------|------------|-------------|-------------|---------|-----------------|
| NR             | none       | NR          | NR          | none    | chr1:27105931   |
| NR             | none       | NR          | NR          | none    | chr3:181430901  |
| NR             | none       | NR          | NR          | none    | chr5:112175211  |
| NR             | none       | NR          | NR          | none    | chr5:112175603  |
| NR             | none       | NR          | NR          | none    | chr5:112176559  |
| NR             | none       | NR          | NR          | none    | chr7:128843396  |
| NR             | none       | NR          | NR          | none    | chr1:11181327   |
| NR             | none       | NR          | NR          | none    | chr1:11313993   |
| NR             | none       | NR          | NR          | none    | chr1:144918984  |
| NR             | none       | NR          | NR          | none    | chr1:147091495  |
| NR             | none       | NR          | NR          | none    | chr1:162740264  |
| NR             | none       | NR          | NR          | none    | chr1:162743362  |
| NR             | none       | NR          | NR          | none    | chr1:193111048  |
| NR             | none       | NR          | NR          | none    | chr1:204433727  |
| NR             | none       | NR          | NR          | none    | chr1:226552729  |
| NR             | none       | NR          | NR          | none    | chr1:27106648   |
| NR             | none       | NR          | NR          | none    | chr1:45798440   |
| NR             | none       | NR          | NR          | none    | chr10:114903764 |
| NR             | none       | NR          | NR          | none    | chr10:114910882 |
| NR             | none       | NR          | NR          | none    | chr10:123260408 |
| NR             | none       | NR          | NR          | none    | chr10:123325158 |
| NR             | none       | NR          | NR          | none    | chr10:22021981  |
| NR             | none       | NR          | NR          | none    | chr10:70432654  |
| NR             | none       | NR          | NR          | none    | chr10:88676945  |
| NR             | none       | NR          | NR          | none    | chr10:89624245  |
| NR             | none       | NR          | NR          | none    | chr10:89692928  |
| NR             | none       | NR          | NR          | none    | chr10:89711992  |
| NR             | none       | NR          | NR          | none    | chr11:108175462 |
| NR             | none       | NR          | NR          | none    | chr11:108175463 |
| NR             | none       | NR          | NR          | none    | chr11:108216568 |
| NR             | none       | NR          | NR          | none    | chr11:4148290   |
| NR             | none       | NR          | NR          | none    | chr12:121416650 |
| NR             | none       | NR          | NR          | none    | chr12:121435342 |
| NR             | none       | NR          | NR          | none    | chr12:121435427 |
| NR             | none       | NR          | NR          | none    | chr12:132502873 |
| NR             | none       | NR          | NR          | none    | chr12:25362777  |
| NR             | none       | NR          | NR          | none    | chr12:46230604  |
| NR             | none       | NR          | NR          | none    | chr13:28979994  |
| NR             | none       | NR          | NR          | none    | chr14:51204959  |
| NR             | none       | NR          | NR          | none    | chr14:81609692  |
| NR             | none       | NR          | NR          | none    | chr14:95595941  |
| NR             | none       | NR          | NR          | none    | chr15:99250839  |
| NR             | none       | NR          | NR          | none    | chr16:3788618   |
| NR             | none       | NR          | NR          | none    | chr17:12016675  |
| NR             | none       | NR          | NR          | none    | chr17:37665992  |

|    |      |    |    |      |                |
|----|------|----|----|------|----------------|
| NR | none | NR | NR | none | chr17:37880988 |
| NR | none | NR | NR | none | chr17:37881000 |
| NR | none | NR | NR | none | chr17:37884037 |
| NR | none | NR | NR | none | chr17:48273335 |
| NR | none | NR | NR | none | chr17:7574003  |
| NR | none | NR | NR | none | chr17:7574012  |
| NR | none | NR | NR | none | chr17:7574035  |
| NR | none | NR | NR | none | chr17:7576851  |
| NR | none | NR | NR | none | chr17:7577082  |
| NR | none | NR | NR | none | chr17:7577121  |
| NR | none | NR | NR | none | chr17:7577498  |
| NR | none | NR | NR | none | chr17:7577538  |
| NR | none | NR | NR | none | chr17:7577539  |
| NR | none | NR | NR | none | chr17:7577548  |
| NR | none | NR | NR | none | chr17:7577556  |
| NR | none | NR | NR | none | chr17:7577581  |
| NR | none | NR | NR | none | chr17:7578263  |
| NR | none | NR | NR | none | chr17:7578395  |
| NR | none | NR | NR | none | chr17:7578404  |
| NR | none | NR | NR | none | chr17:7578406  |
| NR | none | NR | NR | none | chr18:45374881 |
| NR | none | NR | NR | none | chr18:47800596 |
| NR | none | NR | NR | none | chr18:48591919 |
| NR | none | NR | NR | none | chr18:48593405 |
| NR | none | NR | NR | none | chr18:48604701 |
| NR | none | NR | NR | none | chr19:11101993 |
| NR | none | NR | NR | none | chr19:45858976 |
| NR | none | NR | NR | none | chr2:141707868 |
| NR | none | NR | NR | none | chr2:178095644 |
| NR | none | NR | NR | none | chr2:209108311 |
| NR | none | NR | NR | none | chr2:212570063 |
| NR | none | NR | NR | none | chr2:212812179 |
| NR | none | NR | NR | none | chr2:216243903 |
| NR | none | NR | NR | none | chr2:47643551  |
| NR | none | NR | NR | none | chr20:57484421 |
| NR | none | NR | NR | none | chr22:41548008 |
| NR | none | NR | NR | none | chr3:128202753 |
| NR | none | NR | NR | none | chr3:128204951 |
| NR | none | NR | NR | none | chr3:134880871 |
| NR | none | NR | NR | none | chr3:142222284 |
| NR | none | NR | NR | none | chr3:142281298 |
| NR | none | NR | NR | none | chr3:178916876 |
| NR | none | NR | NR | none | chr3:178916924 |
| NR | none | NR | NR | none | chr3:30732970  |
| NR | none | NR | NR | none | chr3:37053568  |
| NR | none | NR | NR | none | chr3:41277275  |
| NR | none | NR | NR | none | chr3:69928509  |

|    |      |    |    |      |                |
|----|------|----|----|------|----------------|
| NR | none | NR | NR | none | chr4:153249510 |
| NR | none | NR | NR | none | chr4:153250883 |
| NR | none | NR | NR | none | chr4:1807478   |
| NR | none | NR | NR | none | chr4:1808286   |
| NR | none | NR | NR | none | chr4:55152040  |
| NR | none | NR | NR | none | chr4:55593464  |
| NR | none | NR | NR | none | chr4:55599268  |
| NR | none | NR | NR | none | chr4:55979558  |
| NR | none | NR | NR | none | chr5:112102978 |
| NR | none | NR | NR | none | chr5:112151204 |
| NR | none | NR | NR | none | chr5:112154969 |
| NR | none | NR | NR | none | chr5:112162854 |
| NR | none | NR | NR | none | chr5:112162891 |
| NR | none | NR | NR | none | chr5:112164616 |
| NR | none | NR | NR | none | chr5:112173917 |
| NR | none | NR | NR | none | chr5:112173953 |
| NR | none | NR | NR | none | chr5:112175216 |
| NR | none | NR | NR | none | chr5:112175322 |
| NR | none | NR | NR | none | chr5:112175390 |
| NR | none | NR | NR | none | chr5:112175639 |
| NR | none | NR | NR | none | chr6:134491471 |
| NR | none | NR | NR | none | chr6:152510429 |
| NR | none | NR | NR | none | chr6:152706918 |
| NR | none | NR | NR | none | chr6:18236780  |
| NR | none | NR | NR | none | chr7:106509723 |
| NR | none | NR | NR | none | chr7:140481411 |
| NR | none | NR | NR | none | chr7:148525904 |
| NR | none | NR | NR | none | chr7:2979448   |
| NR | none | NR | NR | none | chr7:55214348  |
| NR | none | NR | NR | none | chr7:55268916  |
| NR | none | NR | NR | none | chr7:6043355   |
| NR | none | NR | NR | none | chr8:103357685 |
| NR | none | NR | NR | none | chr9:135985831 |
| NR | none | NR | NR | none | chr9:8485834   |
| NR | none | NR | NR | none | chr9:93640009  |
| NR | none | NR | NR | none | chr9:98211572  |
| NR | none | NR | NR | none | chrX:41075279  |
| NR | none | NR | NR | none | chrX:44969370  |
| NR | none | NR | NR | none | chrX:44970644  |
| NR | none | NR | NR | none | chr1:11168337  |
| NR | none | NR | NR | none | chr1:120478125 |
| NR | none | NR | NR | none | chr1:120539904 |
| NR | none | NR | NR | none | chr1:144854558 |
| NR | none | NR | NR | none | chr1:144859889 |
| NR | none | NR | NR | none | chr1:204397289 |
| NR | none | NR | NR | none | chr1:204426879 |
| NR | none | NR | NR | none | chr1:220825377 |

|    |      |    |    |      |                 |
|----|------|----|----|------|-----------------|
| NR | none | NR | NR | none | chr1:220835212  |
| NR | none | NR | NR | none | chr1:27105838   |
| NR | none | NR | NR | none | chr1:65303659   |
| NR | none | NR | NR | none | chr1:65311214   |
| NR | none | NR | NR | none | chr1:65321250   |
| NR | none | NR | NR | none | chr1:9777666    |
| NR | none | NR | NR | none | chr10:104357020 |
| NR | none | NR | NR | none | chr10:43606856  |
| NR | none | NR | NR | none | chr10:43613843  |
| NR | none | NR | NR | none | chr11:108123551 |
| NR | none | NR | NR | none | chr11:108138003 |
| NR | none | NR | NR | none | chr11:108143456 |
| NR | none | NR | NR | none | chr11:32417842  |
| NR | none | NR | NR | none | chr11:44129546  |
| NR | none | NR | NR | none | chr11:64577147  |
| NR | none | NR | NR | none | chr12:121416864 |
| NR | none | NR | NR | none | chr12:121432117 |
| NR | none | NR | NR | none | chr12:43770052  |
| NR | none | NR | NR | none | chr12:43825284  |
| NR | none | NR | NR | none | chr12:56494998  |
| NR | none | NR | NR | none | chr12:56495016  |
| NR | none | NR | NR | none | chr13:103528002 |
| NR | none | NR | NR | none | chr14:105239894 |
| NR | none | NR | NR | none | chr14:62194239  |
| NR | none | NR | NR | none | chr14:62207327  |
| NR | none | NR | NR | none | chr14:62207557  |
| NR | none | NR | NR | none | chr14:92441008  |
| NR | none | NR | NR | none | chr14:92461859  |
| NR | none | NR | NR | none | chr14:95590698  |
| NR | none | NR | NR | none | chr15:66729108  |
| NR | none | NR | NR | none | chr15:99442820  |
| NR | none | NR | NR | none | chr16:15814883  |
| NR | none | NR | NR | none | chr16:2124250   |
| NR | none | NR | NR | none | chr16:2133701   |
| NR | none | NR | NR | none | chr16:3778882   |
| NR | none | NR | NR | none | chr16:3795292   |
| NR | none | NR | NR | none | chr17:29509641  |
| NR | none | NR | NR | none | chr17:29677228  |
| NR | none | NR | NR | none | chr17:37650845  |
| NR | none | NR | NR | none | chr17:48274561  |
| NR | none | NR | NR | none | chr17:66511578  |
| NR | none | NR | NR | none | chr17:78355494  |
| NR | none | NR | NR | none | chr17:8110130   |
| NR | none | NR | NR | none | chr18:25568610  |
| NR | none | NR | NR | none | chr18:48591923  |
| NR | none | NR | NR | none | chr18:50832036  |
| NR | none | NR | NR | none | chr19:11123688  |

|    |      |    |    |      |                |
|----|------|----|----|------|----------------|
| NR | none | NR | NR | none | chr19:1207176  |
| NR | none | NR | NR | none | chr19:1221293  |
| NR | none | NR | NR | none | chr19:45860637 |
| NR | none | NR | NR | none | chr2:141092084 |
| NR | none | NR | NR | none | chr2:141116447 |
| NR | none | NR | NR | none | chr2:141201978 |
| NR | none | NR | NR | none | chr2:141232800 |
| NR | none | NR | NR | none | chr2:141245207 |
| NR | none | NR | NR | none | chr2:141274576 |
| NR | none | NR | NR | none | chr2:141625410 |
| NR | none | NR | NR | none | chr2:141773397 |
| NR | none | NR | NR | none | chr2:142567910 |
| NR | none | NR | NR | none | chr2:209108317 |
| NR | none | NR | NR | none | chr2:209113192 |
| NR | none | NR | NR | none | chr2:219545345 |
| NR | none | NR | NR | none | chr2:29416481  |
| NR | none | NR | NR | none | chr2:29940529  |
| NR | none | NR | NR | none | chr2:47637507  |
| NR | none | NR | NR | none | chr2:47698108  |
| NR | none | NR | NR | none | chr2:60773146  |
| NR | none | NR | NR | none | chr2:61717816  |
| NR | none | NR | NR | none | chr20:39788754 |
| NR | none | NR | NR | none | chr20:39792063 |
| NR | none | NR | NR | none | chr20:57474021 |
| NR | none | NR | NR | none | chr20:57485812 |
| NR | none | NR | NR | none | chr22:36684816 |
| NR | none | NR | NR | none | chr22:41513774 |
| NR | none | NR | NR | none | chr22:41547910 |
| NR | none | NR | NR | none | chr22:41574892 |
| NR | none | NR | NR | none | chr3:12626080  |
| NR | none | NR | NR | none | chr3:142242985 |
| NR | none | NR | NR | none | chr3:142281353 |
| NR | none | NR | NR | none | chr3:178916917 |
| NR | none | NR | NR | none | chr3:187440264 |
| NR | none | NR | NR | none | chr3:187440364 |
| NR | none | NR | NR | none | chr3:187443314 |
| NR | none | NR | NR | none | chr3:188327409 |
| NR | none | NR | NR | none | chr3:195594858 |
| NR | none | NR | NR | none | chr3:37090407  |
| NR | none | NR | NR | none | chr3:41275179  |
| NR | none | NR | NR | none | chr3:47059214  |
| NR | none | NR | NR | none | chr3:47162886  |
| NR | none | NR | NR | none | chr3:52440855  |
| NR | none | NR | NR | none | chr3:52613209  |
| NR | none | NR | NR | none | chr3:89390150  |
| NR | none | NR | NR | none | chr3:89391112  |
| NR | none | NR | NR | none | chr3:89521664  |

|    |      |    |    |      |                |
|----|------|----|----|------|----------------|
| NR | none | NR | NR | none | chr4:106155199 |
| NR | none | NR | NR | none | chr4:106156187 |
| NR | none | NR | NR | none | chr4:106157698 |
| NR | none | NR | NR | none | chr4:106164916 |
| NR | none | NR | NR | none | chr4:106196829 |
| NR | none | NR | NR | none | chr4:55593481  |
| NR | none | NR | NR | none | chr4:55602724  |
| NR | none | NR | NR | none | chr4:55960993  |
| NR | none | NR | NR | none | chr4:87968524  |
| NR | none | NR | NR | none | chr5:131927610 |
| NR | none | NR | NR | none | chr5:180043918 |
| NR | none | NR | NR | none | chr5:38489330  |
| NR | none | NR | NR | none | chr5:67575548  |
| NR | none | NR | NR | none | chr5:67588148  |
| NR | none | NR | NR | none | chr5:7889295   |
| NR | none | NR | NR | none | chr6:106547325 |
| NR | none | NR | NR | none | chr6:106547372 |
| NR | none | NR | NR | none | chr6:117724379 |
| NR | none | NR | NR | none | chr6:135518349 |
| NR | none | NR | NR | none | chr6:138196066 |
| NR | none | NR | NR | none | chr6:152527386 |
| NR | none | NR | NR | none | chr6:152712428 |
| NR | none | NR | NR | none | chr6:152712559 |
| NR | none | NR | NR | none | chr6:152841662 |
| NR | none | NR | NR | none | chr6:160493913 |
| NR | none | NR | NR | none | chr6:395895    |
| NR | none | NR | NR | none | chr6:51497503  |
| NR | none | NR | NR | none | chr6:51609303  |
| NR | none | NR | NR | none | chr6:51889474  |
| NR | none | NR | NR | none | chr6:51907698  |
| NR | none | NR | NR | none | chr6:51907900  |
| NR | none | NR | NR | none | chr7:100411556 |
| NR | none | NR | NR | none | chr7:100417397 |
| NR | none | NR | NR | none | chr7:106508539 |
| NR | none | NR | NR | none | chr7:106508919 |
| NR | none | NR | NR | none | chr7:106509331 |
| NR | none | NR | NR | none | chr7:116340262 |
| NR | none | NR | NR | none | chr7:126173716 |
| NR | none | NR | NR | none | chr7:2959172   |
| NR | none | NR | NR | none | chr7:2979559   |
| NR | none | NR | NR | none | chr7:55249063  |
| NR | none | NR | NR | none | chr7:55270249  |
| NR | none | NR | NR | none | chr8:103266602 |
| NR | none | NR | NR | none | chr8:103326128 |
| NR | none | NR | NR | none | chr8:113364696 |
| NR | none | NR | NR | none | chr8:113841946 |
| NR | none | NR | NR | none | chr8:114111084 |

[illegible]



[illegible]

[illegible]

[illegible]

[illegible]
