# Supplementary material for: Identification of Novel Mutations in Colorectal Cancer Patients using Ampliseq Comprehensive Cancer Panel
Source: Preprints.org preprint supplement (doi:10.20944/preprints202104.0401.v1), 2021-04-15
Supplement: Supplementary file 1 [file supplementary]

## Sheet: Expand
Supplementary table S6
sn	CHR	SNP	Gene ID_CRC_Panel	A1	A2	EXON	INTRON	cDNA_position	CDS_position	Protein_position	Amino_acids	Codons	Existing_variation	large_intestine_pathogenic	all_pathogenic	pathogenic	large_intestine_somatic	all_somatic	Somatic			other cancer type
2479	9	chr9:133729620	ABL1	G	T	2/11	-	680	306	102	T	acT/acG	rs111886835	NR	NR	none	NR	NR	none
2480	9	chr9:133747662	ABL1	A	G	-	5/10	-	-	-	-	-	rs34938942	NR	NR	none	NR	NR	none
2481	9	chr9:133747674	ABL1	A	G	-	5/10	-	-	-	-	-	rs11244169	NR	NR	none	NR	NR	none
2482	9	chr9:133755528	ABL1	G	A	9/11	-	1928	1554	518	E	gaA/gaG	rs2227985,COSM5021130,COSM6191385	0	NEUTRAL	none	Confirmed somatic variant	Confirmed somatic variant	Confirmed somatic variant
2483	9	chr9:133759546	ABL1	A	G	11/11	-	2300	1926	642	E	gaG/gaA	rs34717358,COSM4407394	NR	NR	none	NR	NR	none
2484	9	chr9:133759978	ABL1	G	A	11/11	-	2732	2358	786	A	gcA/gcG	rs138216232	NR	NR	none	NR	NR	none
2485	9	chr9:133760029	ABL1	G	C	11/11	-	2783	2409	803	P	ccC/ccG	rs2229070,COSM3720677	NR	NR	none	NR	NR	none
2486	9	chr9:133760592	ABL1	T	C	11/11	-	3346	2972	991	S/L	tCg/tTg	rs2229067	NR	NR	none	NR	NR	none
2487	9	chr9:133760617	ABL1	T	C	11/11	-	3371	2997	999	P	ccC/ccT	rs11558834,COSM1648118,COSM1648119,COSM5019106,COSM752540	NR	NEUTRAL	none	NR	Variant of unknown origin	none
2488	9	chr9:133761001	ABL1	G	A	11/11	-	3755	3381	1127	P	ccA/ccG	rs1056171,COSM5019122	NEUTRAL	NEUTRAL	none	Confirmed somatic variant	Confirmed somatic variant	Confirmed somatic variant
2489	9	chr9:133761139	ABL1	A	G	-	-	-	-	-	-	-	rs1056174	NR	NR	none	NR	NR	none
353	1	chr1:179077109	ABL2	T	C	12/12	-	3497	3293	1098	S/N	aGt/aAt	rs142446654	NR	NR	none	NR	NR	none
354	1	chr1:179084080	ABL2	G	T	9/12	-	1698	1494	498	L	ctA/ctC	rs2274230	NR	NR	none	NR	NR	none
355	1	chr1:179087934	ABL2	C	T	-	6/11	-	-	-	-	-	rs2171959	NR	NR	none	NR	NR	none
356	1	chr1:179090944	ABL2	A	G	5/12	-	950	746	249	S/F	tCc/tTc	rs766804361	NR	NR	none	NR	NR	none
357	1	chr1:179112145	ABL2	G	C	-	1/11	-	-	-	-	-	rs1318056	NR	NR	none	NR	NR	none
663	2	chr2:148653961	ACVR2A	T	G	2/11	-	783	147	49	P	ccG/ccT	rs762145672	NR	NR	none	NR	NR	none
664	2	chr2:148657117	ACVR2A	A	G	3/11	-	990	354	118	P	ccG/ccA	rs1128919,COSM3757658	NEUTRAL	NEUTRAL	none	Confirmed somatic variant	Confirmed somatic variant	Confirmed somatic variant
665	2	chr2:148672817	ACVR2A	T	G	5/11	-	1222	586	196	E/*	Gaa/Taa	-	NR	NR	none	NR	NR	none
666	2	chr2:148675976	ACVR2A	C	T	-	6/10	-	-	-	-	-	rs201553935	NR	NR	none	NR	NR	none
667	2	chr2:148683686	ACVR2A	-	A	10/11	-	1939	1303	435	K/X	Aaa/aa	rs764719749,COSM252949	0	NR	none	Confirmed somatic variant	NR	Confirmed somatic variant
2881	12	chr12:43769228	ADAMTS20	C	A	36/39	-	5400	5400	1800	T	acT/acG	rs10506226	NR	NR	none	NR	NR	none
2882	12	chr12:43769276	ADAMTS20	C	T	36/39	-	5352	5352	1784	R	agA/agG	rs10880473	NR	NR	none	NR	NR	none
2883	12	chr12:43769853	ADAMTS20	A	C	-	35/38	-	-	-	-	-	rs553663599	NR	NR	none	NR	NR	none
2884	12	chr12:43770046	ADAMTS20	C	A	34/39	-	5213	5213	1738	I/R	aTa/aGa	rs150420241	NR	NR	none	NR	NR	none
2885	12	chr12:43770052	ADAMTS20	T	C	34/39	-	5207	5207	1736	G/E	gGa/gAa	COSM5922940,COSM5922941	NR	PATHOGENIC	PATHOGENIC	NR	Confirmed somatic variant	Confirmed somatic variant
2886	12	chr12:43770197	ADAMTS20	-	AT	-	33/38	-	-	-	-	-	rs34115972	NR	NR	none	NR	NR	none
2887	12	chr12:43771163	ADAMTS20	T	C	-	32/38	-	-	-	-	-	rs370183028	NR	NR	none	NR	NR	none
2888	12	chr12:43819434	ADAMTS20	-	A	28/39	-	4167	4167	1389	N/X	aaT/aa	rs749250230	NR	NR	none	NR	NR	none
2889	12	chr12:43822171	ADAMTS20	A	G	26/39	-	3818	3818	1273	S/F	tCc/tTc	rs7310011	NR	NR	none	NR	NR	none
2890	12	chr12:43823561	ADAMTS20	C	T	-	23/38	-	-	-	-	-	rs143606795	NR	NR	none	NR	NR	none
2891	12	chr12:43825284	ADAMTS20	G	C	22/39	-	3112	3112	1038	G/R	Ggt/Cgt	COSM4967349,COSM4967350,COSM4967351,COSM5970693,COSM5970694,COSM5970695	NR	PATHOGENIC	PATHOGENIC	NR	Confirmed somatic variant	Confirmed somatic variant
2892	12	chr12:43826100	ADAMTS20	C	A	-	21/38	-	-	-	-	-	rs768937064	NR	NR	none	NR	NR	none
2893	12	chr12:43826204	ADAMTS20	T	C	21/39	-	2999	2999	1000	R/H	cGt/cAt	rs7297737	NR	NR	none	NR	NR	none
2894	12	chr12:43828141	ADAMTS20	A	T	19/39	-	2627	2627	876	K/M	aAg/aTg	rs7302446	NR	NR	none	NR	NR	none
2895	12	chr12:43833416	ADAMTS20	G	C	-	18/38	-	-	-	-	-	rs3764469	NR	NR	none	NR	NR	none
2896	12	chr12:43833739	ADAMTS20	G	A	17/39	-	2424	2424	808	I	atT/atC	rs61754845	NR	NR	none	NR	NR	none
2897	12	chr12:43840370	ADAMTS20	A	G	-	15/38	-	-	-	-	-	rs61925148	NR	NR	none	NR	NR	none
2898	12	chr12:43846272	ADAMTS20	T	C	-	13/38	-	-	-	-	-	rs7307955	NR	NR	none	NR	NR	none
2899	12	chr12:43846296	ADAMTS20	T	G	-	13/38	-	-	-	-	-	-	NR	NR	none	NR	NR	none
2900	12	chr12:43847683	ADAMTS20	G	A	-	12/38	-	-	-	-	-	rs11182085	NR	NR	none	NR	NR	none
2901	12	chr12:43847712	ADAMTS20	G	A	12/39	-	1758	1758	586	P	ccT/ccC	rs1308357478,COSM6136588,COSM6136589,COSM6136590	NR	NEUTRAL	none	NR	Variant of unknown origin	none
2902	12	chr12:43860398	ADAMTS20	T	C	-	9/38	-	-	-	-	-	rs74913159	NR	NR	none	NR	NR	none
2903	12	chr12:43860526	ADAMTS20	G	A	9/39	-	1296	1296	432	P	ccT/ccC	rs11182088	NR	NR	none	NR	NR	none
2904	12	chr12:43944811	ADAMTS20	T	C	2/39	-	354	354	118	E	gaG/gaA	rs149358464	NR	NR	none	NR	NR	none
1153	4	chr4:87967235	AFF1	T	C	-	2/20	-	-	-	-	-	rs2272777	NR	NR	none	NR	NR	none
1154	4	chr4:87967279	AFF1	C	A	-	2/20	-	-	-	-	-	-	NR	NR	none	NR	NR	none
1155	4	chr4:87967936	AFF1	T	C	4/21	-	524	249	83	H	caC/caT	-	NR	NR	none	NR	NR	none
1156	4	chr4:87968427	AFF1	G	A	4/21	-	1015	740	247	Y/C	tAt/tGt	rs753869093	NR	NR	none	NR	NR	none
1157	4	chr4:87968524	AFF1	A	G	4/21	-	1112	837	279	Q	caG/caA	rs2230858,COSM3661248	NR	PATHOGENIC	PATHOGENIC	NR	Confirmed somatic variant	Confirmed somatic variant
1158	4	chr4:87968736	AFF1	C	A	4/21	-	1324	1049	350	Q/P	cAg/cCg	rs55652800	NR	NR	none	NR	NR	none
1159	4	chr4:87968780	AFF1	C	T	-	4/20	-	-	-	-	-	rs61009470	NR	NR	none	NR	NR	none
1160	4	chr4:88016116	AFF1	A	G	8/21	-	1553	1278	426	T	acG/acA	rs145877283	NR	NR	none	NR	NR	none
1161	4	chr4:88029482	AFF1	G	C	-	11/20	-	-	-	-	-	rs3733377	NR	NR	none	NR	NR	none
1162	4	chr4:88036017	AFF1	C	A	12/21	-	2307	2032	678	K/Q	Aag/Cag	rs200738066	NR	NR	none	NR	NR	none
1163	4	chr4:88046113	AFF1	G	T	-	12/20	-	-	-	-	-	rs376777716	NR	NR	none	NR	NR	none
1164	4	chr4:88047265	AFF1	T	C	14/21	-	2863	2588	863	S/F	tCc/tTc	rs770445098	NR	NR	none	NR	NR	none
1165	4	chr4:88047314	AFF1	A	G	14/21	-	2912	2637	879	S	tcG/tcA	rs139239111	NR	NR	none	NR	NR	none
1166	4	chr4:88047503	AFF1	T	C	-	14/20	-	-	-	-	-	rs561982538	NR	NR	none	NR	NR	none
1167	4	chr4:88052219	AFF1	C	T	-	16/20	-	-	-	-	-	rs342467	NR	NR	none	NR	NR	none
1168	4	chr4:88053085	AFF1	T	C	-	18/20	-	-	-	-	-	rs342466	NR	NR	none	NR	NR	none
1169	4	chr4:88053606	AFF1	A	C	-	19/20	-	-	-	-	-	rs777901864	NR	NR	none	NR	NR	none
577	2	chr2:100199374	AFF3	A	G	16/24	-	2898	2754	918	S	agC/agT	rs750520540	NR	NR	none	NR	NR	none
578	2	chr2:100209627	AFF3	-	C	-	14/23	-	-	-	-	-	rs143390383	NR	NR	none	NR	NR	none
579	2	chr2:100210074	AFF3	C	G	14/24	-	2268	2124	708	S	tcC/tcG	rs1047281,COSM3682188	NR	NEUTRAL	none	NR	Confirmed somatic variant	Confirmed somatic variant
580	2	chr2:100210422	AFF3	T	C	14/24	-	1920	1776	592	V	gtG/gtA	rs763821193	NR	NR	none	NR	NR	none
581	2	chr2:100210642	AFF3	C	T	14/24	-	1700	1556	519	N/S	aAt/aGt	rs1047265	NR	NR	none	NR	NR	none
582	2	chr2:100218013	AFF3	C	T	13/24	-	1474	1330	444	S/G	Agc/Ggc	rs760333652,COSM4618075	NEUTRAL	NEUTRAL	none	Reported in another cancer sample as somatic	Confirmed somatic variant	Confirmed somatic variant
583	2	chr2:100218080	AFF3	A	G	13/24	-	1407	1263	421	A	gcC/gcT	rs4851214	NR	NR	none	NR	NR	none
584	2	chr2:100288931	AFF3	A	G	-	11/23	-	-	-	-	-	rs4851222	NR	NR	none	NR	NR	none
585	2	chr2:100343557	AFF3	T	C	10/24	-	1292	1148	383	S/N	aGt/aAt	rs4851223	NR	NR	none	NR	NR	none
586	2	chr2:100623130	AFF3	A	G	6/24	-	1056	912	304	A	gcC/gcT	rs34506074	NR	NR	none	NR	NR	none
1908	7	chr7:91603004	AKAP9	A	G	-	1/49	-	-	-	-	-	rs10264979	NR	NR	none	NR	NR	none
1909	7	chr7:91603056	AKAP9	T	C	2/50	-	313	80	27	S/L	tCg/tTg	rs142401936	NR	NR	none	NR	NR	none
1910	7	chr7:91630490	AKAP9	G	A	8/50	-	1492	1259	420	Q/R	cAa/cGa	rs375876545	NR	NR	none	NR	NR	none
1911	7	chr7:91630620	AKAP9	T	G	8/50	-	1622	1389	463	M/I	atG/atT	rs6964587,CM064968	NR	NR	none	NR	NR	none
1912	7	chr7:91631234	AKAP9	C	A	8/50	-	2236	2003	668	D/A	gAt/gCt	-	NR	NR	none	NR	NR	none
1913	7	chr7:91631708	AKAP9	C	T	8/50	-	2710	2477	826	I/T	aTa/aCa	rs534185372	NR	NR	none	NR	NR	none
1914	7	chr7:91632306	AKAP9	C	T	8/50	-	3308	3075	1025	T	acC/acT	rs1989779	NR	NR	none	NR	NR	none
1915	7	chr7:91641671	AKAP9	TGC	CAA	-	8/49	-	-	-	-	-	-	NR	NR	none	NR	NR	none
1916	7	chr7:91641672	AKAP9	-	A	-	8/49	-	-	-	-	-	rs1337924020	NR	NR	none	NR	NR	none
1917	7	chr7:91641928	AKAP9	G	A	9/50	-	3737	3504	1168	E	gaA/gaG	rs13245393	NR	NR	none	NR	NR	none
1918	7	chr7:91667692	AKAP9	G	T	-	16/49	-	-	-	-	-	rs2285333	NR	NR	none	NR	NR	none
1919	7	chr7:91670064	AKAP9	C	T	18/50	-	5002	4769	1590	M/T	aTg/aCg	-	NR	NR	none	NR	NR	none
1920	7	chr7:91670132	AKAP9	G	A	18/50	-	5070	4837	1613	M/V	Atg/Gtg	rs193922723	NR	NR	none	NR	NR	none
1921	7	chr7:91672096	AKAP9	G	T	-	20/49	-	-	-	-	-	-	NR	NR	none	NR	NR	none
1922	7	chr7:91682040	AKAP9	G	T	22/50	-	5602	5369	1790	V/G	gTt/gGt	rs151021935	NR	NR	none	NR	NR	none
1923	7	chr7:91699372	AKAP9	A	-	27/50	-	6591-6592	6358-6359	2120	E/EX	gaa/gAaa	-	NR	NR	none	NR	NR	none
1924	7	chr7:91708493	AKAP9	C	T	31/50	-	7279	7046	2349	I/T	aTa/aCa	rs1222187660	NR	NR	none	NR	NR	none
1925	7	chr7:91708521	AKAP9	G	A	31/50	-	7307	7074	2358	K	aaA/aaG	rs150968594	NR	NR	none	NR	NR	none
1926	7	chr7:91708898	AKAP9	G	A	31/50	-	7684	7451	2484	K/R	aAa/aGa	rs35759833,COSM1673289,COSM1673290	NEUTRAL	NEUTRAL	none	Confirmed somatic variant	Confirmed somatic variant	Confirmed somatic variant
1927	7	chr7:91709156	AKAP9	G	T	31/50	-	7942	7709	2570	F/C	tTc/tGc	-	NR	NR	none	NR	NR	none
1928	7	chr7:91712698	AKAP9	G	A	33/50	-	8608	8375	2792	N/S	aAt/aGt	rs6960867	NR	NR	none	NR	NR	none
1929	7	chr7:91712728	AKAP9	A	C	33/50	-	8638	8405	2802	A/E	gCa/gAa	-	NR	NR	none	NR	NR	none
1930	7	chr7:91713047	AKAP9	C	T	-	33/49	-	-	-	-	-	rs76775274	NR	NR	none	NR	NR	none
1931	7	chr7:91713880	AKAP9	G	C	-	33/49	-	-	-	-	-	rs61144642	NR	NR	none	NR	NR	none
1932	7	chr7:91713972	AKAP9	T	C	34/50	-	8898	8665	2889	L	Cta/Tta	rs10228334	NR	NR	none	NR	NR	none
1933	7	chr7:91714911	AKAP9	C	T	36/50	-	9168	8935	2979	P/S	Cct/Tct	rs1063242	NR	NR	none	NR	NR	none
1934	7	chr7:91715609	AKAP9	G	A	37/50	-	9325	9092	3031	Q/R	cAa/cGa	rs61757673	NR	NR	none	NR	NR	none
1935	7	chr7:91715662	AKAP9	T	C	37/50	-	9378	9145	3049	L	Ctg/Ttg	rs28927678	NR	NR	none	NR	NR	none
1936	7	chr7:91726470	AKAP9	C	T	41/50	-	10430	10197	3399	T	acT/acC	rs143627839	NR	NR	none	NR	NR	none
1937	7	chr7:91726927	AKAP9	C	A	42/50	-	10659	10426	3476	R	Aga/Cga	rs1063243	NR	NR	none	NR	NR	none
1938	7	chr7:91726960	AKAP9	A	G	42/50	-	10692	10459	3487	E/K	Gaa/Aaa	rs61757664	NR	NR	none	NR	NR	none
1939	7	chr7:91729127	AKAP9	G	A	44/50	-	11073	10840	3614	M/V	Atg/Gtg	rs34327395	NR	NR	none	NR	NR	none
3179	14	chr14:105237107	AKT1	A	C	12/13	-	2819	1338	446	M/I	atG/atT	rs751976958	NR	NR	none	NR	NR	none
3180	14	chr14:105238636	AKT1	C	G	-	2020-11-12	-	-	-	-	-	rs17846832	NR	NR	none	NR	NR	none
3181	14	chr14:105238820	AKT1	C	G	-	10/12	-	-	-	-	-	rs61761201	NR	NR	none	NR	NR	none
3182	14	chr14:105239894	AKT1	T	C	8/13	-	2207	726	242	E	gaG/gaA	rs1130233,CM081515,COSM3765730	NR	PATHOGENIC	PATHOGENIC	NR	Confirmed somatic variant	Confirmed somatic variant
3183	14	chr14:105241378	AKT1	T	C	-	5/12	-	-	-	-	-	rs3730346	NR	NR	none	NR	NR	none
3184	14	chr14:105242925	AKT1	T	C	-	3/12	-	-	-	-	-	rs34664585	NR	NR	none	NR	NR	none
3185	14	chr14:105242926	AKT1	A	G	-	3/12	-	-	-	-	-	rs17846822	NR	NR	none	NR	NR	none
3186	14	chr14:105242966	AKT1	C	T	-	3/12	-	-	-	-	-	rs2494735	NR	NR	none	NR	NR	none
3187	14	chr14:105243046	AKT1	T	C	3/13	-	1718	237	79	Q	caG/caA	rs747020429	NR	NR	none	NR	NR	none
3950	19	chr19:40741025	AKT2	T	C	13/14	-	1592	1293	431	T	acG/acA	rs747036690	NR	NR	none	NR	NR	none
3951	19	chr19:40741244	AKT2	A	G	12/14	-	1488	1189	397	P/S	Ccc/Tcc	-	NR	NR	none	NR	NR	none
3952	19	chr19:40742320	AKT2	C	T	-	9/13	-	-	-	-	-	rs2304189	NR	NR	none	NR	NR	none
3953	19	chr19:40743996	AKT2	G	C	9/14	-	1010	711	237	L	ctG/ctC	rs776435289,COSM3225276	NEUTRAL	NEUTRAL	none	Variant of unknown origin	Variant of unknown origin	none
3954	19	chr19:40761026	AKT2	A	C	-	4/13	-	-	-	-	-	rs181993899	NR	NR	none	NR	NR	none
486	1	chr1:243727211	AKT3	-	T	-	9/13	-	-	-	-	-	-	NR	NR	none	NR	NR	none
507	2	chr2:29416366	ALK	C	G	29/29	-	5494	4587	1529	D/E	gaC/gaG	rs1881421,COSM3758201	NEUTRAL	NEUTRAL	none	Confirmed somatic variant	Confirmed somatic variant	Confirmed somatic variant
508	2	chr2:29416481	ALK	C	T	29/29	-	5379	4472	1491	K/R	aAg/aGg	rs1881420,COSM1130802	NR	PATHOGENIC	PATHOGENIC	NR	Confirmed somatic variant	Confirmed somatic variant
509	2	chr2:29416572	ALK	T	C	29/29	-	5288	4381	1461	I/V	Atc/Gtc	rs1670283	NR	NR	none	NR	NR	none
510	2	chr2:29416615	ALK	A	G	29/29	-	5245	4338	1446	T	acC/acT	rs56132472,COSM5019786	NR	NR	none	NR	NR	none
511	2	chr2:29432776	ALK	C	T	-	24/28	-	-	-	-	-	rs3738867	NR	NR	none	NR	NR	none
512	2	chr2:29445412	ALK	T	C	21/29	-	4328	3421	1141	D/N	Gac/Aac	rs748493584	NR	NR	none	NR	NR	none
513	2	chr2:29445458	ALK	T	G	21/29	-	4282	3375	1125	G	ggC/ggA	rs3795850,COSM5351767	NR	NEUTRAL	none	NR	Confirmed somatic variant	Confirmed somatic variant
514	2	chr2:29446184	ALK	G	C	-	20/28	-	-	-	-	-	rs2276550	NR	NR	none	NR	NR	none
515	2	chr2:29446202	ALK	A	G	-	20/28	-	-	-	-	-	rs4622670,COSM6353289	NR	NEUTRAL	none	NR	Confirmed somatic variant	Confirmed somatic variant
516	2	chr2:29449762	ALK	C	T	-	18/28	-	-	-	-	-	rs145846569	NR	NR	none	NR	NR	none
517	2	chr2:29449819	ALK	T	C	18/29	-	3943	3036	1012	T	acG/acA	rs2293563,COSM148824	NR	NEUTRAL	none	NR	Confirmed somatic variant	Confirmed somatic variant
518	2	chr2:29455267	ALK	G	A	15/29	-	3442	2535	845	G	ggT/ggC	rs2256740,COSM148825	NR	NEUTRAL	none	NR	Confirmed somatic variant	Confirmed somatic variant
519	2	chr2:29498210	ALK	G	A	-	10/28	-	-	-	-	-	rs4589708	NR	NR	none	NR	NR	none
520	2	chr2:29498305	ALK	-	A	10/29	-	2782	1875	625	F/X	ttT/tt	-	NR	NR	none	NR	NR	none
521	2	chr2:29519784	ALK	G	A	9/29	-	2694	1787	596	M/T	aTg/aCg	rs754810505	NR	NR	none	NR	NR	none
522	2	chr2:29543663	ALK	C	T	7/29	-	2407	1500	500	Q	caA/caG	rs2293564,COSM4133810	NR	NEUTRAL	none	NR	Confirmed somatic variant	Confirmed somatic variant
523	2	chr2:29551161	ALK	A	G	-	6/28	-	-	-	-	-	rs62130643	NR	NR	none	NR	NR	none
524	2	chr2:29917940	ALK	G	C	-	2/28	-	-	-	-	-	rs2256376	NR	NR	none	NR	NR	none
525	2	chr2:29940529	ALK	T	A	2/29	-	1609	702	234	P	ccT/ccA	rs2246745,COSM4416269	NR	PATHOGENIC	PATHOGENIC	NR	Confirmed somatic variant	Confirmed somatic variant
526	2	chr2:30143499	ALK	C	G	1/29	-	934	27	9	L	ctC/ctG	rs4358080,COSM3749653	NR	NR	none	NR	NR	none
1289	5	chr5:112043384	APC	G	T	1/16	-	167	-	-	-	-	rs78429131	NR	NR	none	NR	NR	none
1290	5	chr5:112101970	APC	C	T	-	2/15	-	-	-	-	-	rs2304793	NR	NR	none	NR	NR	none
1291	5	chr5:112102978	APC	G	A	4/16	-	693	313	105	S/G	Agc/Ggc	rs776242276,COSM6019369	PATHOGENIC	NR	PATHOGENIC	Confirmed somatic variant	NR	Confirmed somatic variant
1292	5	chr5:112151191	APC	T	G	-	8/15	-	-	-	-	-	CS930758	NR	NR	none	NR	NR	none
1293	5	chr5:112151204	APC	T	C	9/16	-	1227	847	283	R/*	Cga/Tga	rs786201856,CM920030,COSM19679	PATHOGENIC	PATHOGENIC	PATHOGENIC	Confirmed somatic variant	Confirmed somatic variant	Confirmed somatic variant
1294	5	chr5:112154969	APC	A	C	10/16	-	1620	1240	414	R/S	Cgc/Agc	rs137854567,CM910030,CS106545,COSM6922916	PATHOGENIC	PATHOGENIC	PATHOGENIC	Confirmed somatic variant	Confirmed somatic variant	Confirmed somatic variant
1295	5	chr5:112162813	APC	T	C	12/16	-	1797	1417	473	Q/*	Cag/Tag	rs876658868,CD941575,CM970083	NR	NR	none	NR	NR	none
1296	5	chr5:112162854	APC	T	C	12/16	-	1838	1458	486	Y	taT/taC	rs2229992,CM990152,COSM1432175	PATHOGENIC	PATHOGENIC	PATHOGENIC	Confirmed somatic variant	Confirmed somatic variant	Confirmed somatic variant
1297	5	chr5:112162891	APC	T	C	12/16	-	1875	1495	499	R/*	Cga/Tga	rs137854580,CM930023,COSM29364	PATHOGENIC	PATHOGENIC	PATHOGENIC	Confirmed somatic variant	Confirmed somatic variant	Confirmed somatic variant
1298	5	chr5:112164616	APC	T	C	14/16	-	2070	1690	564	R/*	Cga/Tga	rs137854574,CM920035,COSM18848	PATHOGENIC	PATHOGENIC	PATHOGENIC	Confirmed somatic variant	Confirmed somatic variant	Confirmed somatic variant
1299	5	chr5:112164622	APC	A	G	14/16	-	2076	1696	566	V/I	Gtt/Att	-	NR	NR	none	NR	NR	none
1300	5	chr5:112164623	APC	-	T	14/16	-	2077	1697	566	V/X	gTt/gt	-	NR	NR	none	NR	NR	none
1301	5	chr5:112173917	APC	T	C	16/16	-	3006	2626	876	R/*	Cga/Tga	rs121913333,CM942020,COSM18852	PATHOGENIC	PATHOGENIC	PATHOGENIC	Confirmed somatic variant	Confirmed somatic variant	Confirmed somatic variant
1302	5	chr5:112173953	APC	T	G	16/16	-	3042	2662	888	A/S	Gcc/Tcc	COSM5025153	PATHOGENIC	NR	PATHOGENIC	Confirmed somatic variant	NR	Confirmed somatic variant
1303	5	chr5:112173971	APC	TA	GT	16/16	-	3060-3061	2680-2681	894	V/*	GTg/TAg	-	NR	NR	none	NR	NR	none
1304	5	chr5:112174775	APC	A	T	16/16	-	3864	3484	1162	Y/N	Tat/Aat	rs1210397302,COSM4167199	0	NR	none	Confirmed somatic variant	NR	Confirmed somatic variant
1305	5	chr5:112174867	APC	-	AC	16/16	-	3956-3957	3576-3577	1192-1193	KQ/KX	aaACag/aaag	COSM5010238	0	NR	none	Confirmed somatic variant	NR	Confirmed somatic variant
1306	5	chr5:112175098	APC	G	A	16/16	-	4187	3807	1269	I/M	atA/atG	rs876658536,CD084024	NR	NR	none	NR	NR	none
1307	5	chr5:112175208	APC	-	A	16/16	-	4297	3917	1306	E/X	gAa/ga	-	NR	NR	none	NR	NR	none
1308	5	chr5:112175211	APC	A	T	16/16	-	4300	3920	1307	I/K	aTa/aAa	rs1801155,CD130095,CD972005,CM970090,COSM18809,COSM26697,COSM4169443	0	PATHOGENIC	PATHOGENIC	Confirmed somatic variant	Confirmed somatic variant	Confirmed somatic variant
1309	5	chr5:112175216	APC	T	G	16/16	-	4305	3925	1309	E/*	Gaa/Taa	COSM18775	PATHOGENIC	PATHOGENIC	PATHOGENIC	Reported in another cancer sample as somatic	Reported in another cancer sample as somatic	none			Endometrioid carcinoma
1310	5	chr5:112175240	APC	T	G	16/16	-	4329	3949	1317	E/*	Gaa/Taa	CM980089,COSM19099,COSM19253,COSM98384	NR	NR	none	NR	NR	none
1311	5	chr5:112175322	APC	A	C	16/16	-	4411	4031	1344	S/*	tCa/tAa	CM058101,COSM1567581,COSM19135,COSM4166506	PATHOGENIC	NR	PATHOGENIC	Confirmed somatic variant	NR	Confirmed somatic variant
1312	5	chr5:112175390	APC	T	C	16/16	-	4479	4099	1367	Q/*	Cag/Tag	rs121913328,CM940072,COSM13121,COSM3696863	PATHOGENIC	PATHOGENIC	PATHOGENIC	Confirmed somatic variant	Confirmed somatic variant	Confirmed somatic variant
1313	5	chr5:112175529	APC	-	T	16/16	-	4618	4238	1413	M/X	aTg/ag	COSM29336	0	NR	none	Confirmed somatic variant	NR	Confirmed somatic variant
1314	5	chr5:112175596	APC	-	A	16/16	-	4685	4305	1435	R/X	agA/ag	COSM19607	0	NR	none	Confirmed somatic variant	NR	Confirmed somatic variant
1315	5	chr5:112175603	APC	-	A	16/16	-	4692	4312	1438	T/X	Aca/ca	CD106462,COSM18704,COSM6919389	0	PATHOGENIC	PATHOGENIC	Confirmed somatic variant	Confirmed somatic variant	Confirmed somatic variant
1316	5	chr5:112175611	APC	-	ACCACCTCCTCAAACAGCTCAA	16/16	-	4700-4721	4320-4341	1440-1447	PPPPQTAQ/X	ccACCACCTCCTCAAACAGCTCAA/cc	-	NR	NR	none	NR	NR	none
1317	5	chr5:112175639	APC	T	C	16/16	-	4728	4348	1450	R/*	Cga/Tga	rs121913332,CM930030,COSM13127	PATHOGENIC	PATHOGENIC	PATHOGENIC	Confirmed somatic variant	Confirmed somatic variant	Confirmed somatic variant
1318	5	chr5:112175770	APC	A	G	16/16	-	4859	4479	1493	T	acG/acA	rs41115,CD108356,COSM19714,COSM3760869,COSM6475518	0	NEUTRAL	none	Confirmed somatic variant	Confirmed somatic variant	Confirmed somatic variant
1319	5	chr5:112176209	APC	T	C	16/16	-	5298	4918	1640	R/W	Cgg/Tgg	rs373440614,CM942083,COSM4127116	NR	NEUTRAL	none	NR	Confirmed somatic variant	Confirmed somatic variant
1320	5	chr5:112176325	APC	A	G	16/16	-	5414	5034	1678	G	ggG/ggA	rs42427,COSM3760870	NEUTRAL	NEUTRAL	none	Confirmed somatic variant	Confirmed somatic variant	Confirmed somatic variant
1321	5	chr5:112176556	APC	A	G	16/16	-	5645	5265	1755	A	gcG/gcA	rs34506289	NR	NR	none	NR	NR	none
1322	5	chr5:112176559	APC	G	T	16/16	-	5648	5268	1756	S	tcT/tcG	rs866006,COSM4166218,COSM6475354	0	PATHOGENIC	PATHOGENIC	Confirmed somatic variant	Confirmed somatic variant	Confirmed somatic variant
1323	5	chr5:112177171	APC	A	G	16/16	-	6260	5880	1960	P	ccG/ccA	rs465899,COSM3760872	NEUTRAL	NEUTRAL	none	Confirmed somatic variant	Confirmed somatic variant	Confirmed somatic variant
1324	5	chr5:112178492	APC	T	C	16/16	-	7581	7201	2401	L	Cta/Tta	rs2229994,COSM6476031	0	NR	none	Variant of unknown origin	NR	none
1325	5	chr5:112178995	APC	G	A	16/16	-	8084	7704	2568	G	ggA/ggG	rs35043160	NR	NR	none	NR	NR	none
1326	5	chr5:112179909	APC	A	C	16/16	-	8998	-	-	-	-	rs1804197,CR045440	NR	NR	none	NR	NR	none
4222	23	chrX:66765624	AR	A	G	1/8	-	1160	636	212	R	agG/agA	rs150226204	NR	NR	none	NR	NR	none
4223	23	chrX:66765627	AR	A	G	1/8	-	1163	639	213	E	gaG/gaA	rs6152,CM051843,COSM5019465,COSM5019466	NR	NR	none	NR	NR	none
4224	23	chrX:66863108	AR	T	G	2/8	-	2151	1627	543	A/S	Gcc/Tcc	rs1402718521	NR	NR	none	NR	NR	none
4225	23	chrX:66941597	AR	G	T	-	5/7	-	-	-	-	-	rs1337076	NR	NR	none	NR	NR	none
4226	23	chrX:66943601	AR	-	A	8/8	-	3205	2681	894	E/X	gAa/ga	-	NR	NR	none	NR	NR	none
60	1	chr1:27057621	ARID1A	C	A	-	2/19	-	-	-	-	-	rs41303629	NR	NR	none	NR	NR	none
61	1	chr1:27089446	ARID1A	C	G	-	7/19	-	-	-	-	-	rs34681611	NR	NR	none	NR	NR	none
62	1	chr1:27092820	ARID1A	-	A	9/20	-	3212	2841	947	P/X	ccA/cc	-	NR	NR	none	NR	NR	none
63	1	chr1:27092822	ARID1A	T	A	9/20	-	3214	2843	948	Y/F	tAt/tTt	-	NR	NR	none	NR	NR	none
64	1	chr1:27097699	ARID1A	A	T	12/20	-	3659	3288	1096	Y/*	taT/taA	-	NR	NR	none	NR	NR	none
65	1	chr1:27099010	ARID1A	-	G	13/20	-	3797	3426	1142	Q/X	caG/ca	-	NR	NR	none	NR	NR	none
66	1	chr1:27105464	ARID1A	A	C	-	19/19	-	-	-	-	-	rs999999540	NR	NR	none	NR	NR	none
67	1	chr1:27105838	ARID1A	A	G	20/20	-	5820	5449	1817	V/I	Gta/Ata	rs375250508,COSM4236208	NR	PATHOGENIC	PATHOGENIC	NR	Confirmed somatic variant	Confirmed somatic variant
68	1	chr1:27105931	ARID1A	-	G	20/20	-	5913	5542	1848	G/X	Ggg/gg	COSM1341426,COSM350030	0	PATHOGENIC	PATHOGENIC	Reported in another cancer sample as somatic	Variant of unknown origin	none
69	1	chr1:27106078	ARID1A	-	C	20/20	-	6060	5689	1897	P/X	Ccc/cc	COSM1639822	0	NR	none	Confirmed somatic variant	NR	Confirmed somatic variant
70	1	chr1:27106343	ARID1A	T	C	20/20	-	6325	5954	1985	S/F	tCc/tTc	-	NR	NR	none	NR	NR	none
71	1	chr1:27106648	ARID1A	A	G	20/20	-	6630	6259	2087	G/R	Gga/Aga	COSM132992,COSM5483808	PATHOGENIC	PATHOGENIC	PATHOGENIC	Confirmed somatic variant	Confirmed somatic variant	Confirmed somatic variant
2905	12	chr12:46123626	ARID2	C	A	1/21	-	179	7	3	N/H	Aac/Cac	rs868029449	NR	NR	none	NR	NR	none
2906	12	chr12:46123631	ARID2	T	G	1/21	-	184	12	4	S	tcG/tcT	rs781723038	NR	NR	none	NR	NR	none
2907	12	chr12:46205255	ARID2	C	A	4/21	-	511	339	113	V	gtA/gtC	rs73292513	NR	NR	none	NR	NR	none
2908	12	chr12:46211396	ARID2	C	T	-	4/20	-	-	-	-	-	rs17774927	NR	NR	none	NR	NR	none
2909	12	chr12:46215163	ARID2	A	G	-	5/20	-	-	-	-	-	rs2059404	NR	NR	none	NR	NR	none
2910	12	chr12:46230604	ARID2	T	C	8/21	-	1025	853	285	R/W	Cgg/Tgg	COSM189021	PATHOGENIC	PATHOGENIC	PATHOGENIC	Confirmed somatic variant	Reported in another cancer sample as somatic	Confirmed somatic variant			endometrium,pancreatic and stomach
2911	12	chr12:46242588	ARID2	A	T	-	12/20	-	-	-	-	-	rs1430572037	NR	NR	none	NR	NR	none
2912	12	chr12:46245077	ARID2	A	G	15/21	-	3343	3171	1057	S	tcG/tcA	rs7296694	NR	NR	none	NR	NR	none
2913	12	chr12:46245269	ARID2	A	G	15/21	-	3535	3363	1121	L	ttG/ttA	rs77870470	NR	NR	none	NR	NR	none
2914	12	chr12:46254663	ARID2	A	C	16/21	-	5025	4853	1618	S/Y	tCc/tAc	rs144553917	NR	NR	none	NR	NR	none
2915	12	chr12:46285667	ARID2	C	A	17/21	-	5199	5027	1676	Q/P	cAg/cCg	-	NR	NR	none	NR	NR	none
2916	12	chr12:46287171	ARID2	-	TC	-	18/20	-	-	-	-	-	rs138252675,TMP_ESP_12_46287171_46287174	NR	NR	none	NR	NR	none
308	1	chr1:150789884	ARNT	T	C	16/22	-	1732	1531	511	D/N	Gac/Aac	rs1805133	NR	NR	none	NR	NR	none
309	1	chr1:150804340	ARNT	A	G	10/22	-	1110	909	303	F	ttC/ttT	rs146538917,COSM2182588	NR	NEUTRAL	none	NR	Confirmed somatic variant	Confirmed somatic variant
310	1	chr1:150804429	ARNT	C	A	-	9/21	-	-	-	-	-	rs10305704	NR	NR	none	NR	NR	none
311	1	chr1:150808889	ARNT	G	C	7/22	-	768	567	189	V	gtG/gtC	rs2228099	NR	NR	none	NR	NR	none
312	1	chr1:150808978	ARNT	A	G	-	6/21	-	-	-	-	-	-	NR	NR	none	NR	NR	none
313	1	chr1:150814802	ARNT	G	A	-	5/21	-	-	-	-	-	rs10305679	NR	NR	none	NR	NR	none
314	1	chr1:150814874	ARNT	G	C	-	5/21	-	-	-	-	-	rs146550901	NR	NR	none	NR	NR	none
315	1	chr1:150825327	ARNT	-	A	-	2/21	-	-	-	-	-	rs760694753	NR	NR	none	NR	NR	none
316	1	chr1:150830926	ARNT	C	T	2/22	-	237	36	12	S	tcA/tcG	rs141736918	NR	NR	none	NR	NR	none
4002	20	chr20:31017744	ASXL1	A	G	8/13	-	1030	606	202	P	ccG/ccA	rs760344634	NR	NR	none	NR	NR	none
4003	20	chr20:31019024	ASXL1	T	C	-	8/12	-	-	-	-	-	rs2295765	NR	NR	none	NR	NR	none
4004	20	chr20:31022959	ASXL1	C	T	13/13	-	2868	2444	815	L/P	cTg/cCg	rs6058694,COSM6494657,COSM6908477,COSM6908478	NR	NR	none	NR	NR	none
4005	20	chr20:31024274	ASXL1	C	T	13/13	-	4183	3759	1253	S	agT/agC	rs4911231,COSM4134435	NR	NR	none	NR	NR	none
4006	20	chr20:31025163	ASXL1	G	A	13/13	-	5072	-	-	-	-	rs2295764	NR	NR	none	NR	NR	none
4007	20	chr20:31025231	ASXL1	C	T	13/13	-	5140	-	-	-	-	rs2295763	NR	NR	none	NR	NR	none
2942	12	chr12:51203371	ATF1	T	C	4/7	-	349	327	109	Y	taC/taT	rs1129406	NR	NR	none	NR	NR	none
2943	12	chr12:51203376	ATF1	C	T	-	4/6	-	-	-	-	-	rs4986838	NR	NR	none	NR	NR	none
2944	12	chr12:51213433	ATF1	G	A	7/7	-	709	687	229	E	gaA/gaG	rs17291650	NR	NR	none	NR	NR	none
2806	11	chr11:108098460	ATM	-	AA	-	2/62	-	-	-	-	-	rs2066734	NR	NR	none	NR	NR	none
2807	11	chr11:108099888	ATM	G	A	-	3/62	-	-	-	-	-	rs4987907	NR	NR	none	NR	NR	none
2808	11	chr11:108106443	ATM	A	T	5/63	-	763	378	126	D/E	gaT/gaA	rs2234997,CM077897,COSM22498	NR	NR	none	NR	NR	none
2809	11	chr11:108106579	ATM	A	T	-	5/62	-	-	-	-	-	rs762171014	NR	NR	none	NR	NR	none
2810	11	chr11:108114727	ATM	C	G	6/63	-	929	544	182	V/L	Gtt/Ctt	rs3218707,CM035638	NR	NR	none	NR	NR	none
2811	11	chr11:108114774	ATM	T	A	6/63	-	976	591	197	G	ggA/ggT	rs587780630	NR	NR	none	NR	NR	none
2812	11	chr11:108114883	ATM	C	T	-	6/62	-	-	-	-	-	rs2235004	NR	NR	none	NR	NR	none
2813	11	chr11:108115778	ATM	G	T	-	7/62	-	-	-	-	-	rs1800735	NR	NR	none	NR	NR	none
2814	11	chr11:108117897	ATM	TTA	ATT	-	8/62	-	-	-	-	-	-	NR	NR	none	NR	NR	none
2815	11	chr11:108117898	ATM	-	T	-	8/62	-	-	-	-	-	rs764835999	NR	NR	none	NR	NR	none
2816	11	chr11:108121464	ATM	C	T	10/63	-	1657	1272	424	P	ccT/ccC	rs35578748	NR	NR	none	NR	NR	none
2817	11	chr11:108122700	ATM	C	T	11/63	-	2129	1744	582	F/L	Ttc/Ctc	rs2235006,CM023329	NR	NR	none	NR	NR	none
2818	11	chr11:108123551	ATM	T	C	12/63	-	2195	1810	604	P/S	Cct/Tct	rs2227922,CM045888,COSM22499	NR	PATHOGENIC	PATHOGENIC	NR	Reported in another cancer sample as somatic	none
2819	11	chr11:108123589	ATM	C	T	12/63	-	2233	1848	616	T	acT/acC	rs1045549048	NR	NR	none	NR	NR	none
2820	11	chr11:108124761	ATM	C	T	13/63	-	2504	2119	707	S/P	Tct/Cct	rs4986761,CM013692,COSM41595	NR	NEUTRAL	none	NR	Variant of unknown origin	none
2821	11	chr11:108126874	ATM	C	T	-	13/62	-	-	-	-	-	rs2235008	NR	NR	none	NR	NR	none
2822	11	chr11:108138003	ATM	C	T	17/63	-	2957	2572	858	F/L	Ttt/Ctt	rs1800056,CM061641,COSM21826	NR	PATHOGENIC	PATHOGENIC	NR	Variant of unknown origin	none
2823	11	chr11:108143456	ATM	G	C	22/63	-	3546	3161	1054	P/R	cCt/cGt	rs1800057,CM973365,COSM21827,COSM5932708,COSM5932709	NR	PATHOGENIC	PATHOGENIC	NR	Reported in another cancer sample as somatic	none
2824	11	chr11:108150208	ATM	-	T	-	22/62	-	-	-	-	-	rs1799757,COSM5575302,COSM5575303	NR	NR	none	NR	NR	none
2825	11	chr11:108150275	ATM	A	G	23/63	-	3727	3342	1114	K	aaG/aaA	rs138393322	NR	NR	none	NR	NR	none
2826	11	chr11:108151707	ATM	A	T	-	23/62	-	-	-	-	-	rs79701258	NR	NR	none	NR	NR	none
2827	11	chr11:108159671	ATM	T	C	-	27/62	-	-	-	-	-	rs190669728	NR	NR	none	NR	NR	none
2828	11	chr11:108165634	ATM	G	A	-	31/62	-	-	-	-	-	rs3218678	NR	NR	none	NR	NR	none
2829	11	chr11:108170373	ATM	G	T	-	33/62	-	-	-	-	-	rs3092906	NR	NR	none	NR	NR	none
2830	11	chr11:108175394	ATM	C	T	-	36/62	-	-	-	-	-	rs3092829,COSM5019227	NR	NR	none	NR	NR	none
2831	11	chr11:108175462	ATM	A	G	37/63	-	5942	5557	1853	D/N	Gat/Aat	COSM41596	PATHOGENIC	PATHOGENIC	PATHOGENIC	Confirmed somatic variant	Reported in another cancer sample as somatic	Confirmed somatic variant			Prostate and breast
2832	11	chr11:108175463	ATM	T	A	37/63	-	5943	5558	1853	D/V	gAt/gTt	COSM21628	PATHOGENIC	PATHOGENIC	PATHOGENIC	Confirmed somatic variant	Reported in another cancer sample as somatic	Confirmed somatic variant			prostate and lung
2833	11	chr11:108175596	ATM	G	T	-	37/62	-	-	-	-	-	-	NR	NR	none	NR	NR	none
2834	11	chr11:108183167	ATM	G	A	40/63	-	6333	5948	1983	N/S	aAt/aGt	rs659243,COSM4590264	NR	NEUTRAL	none	NR	Variant of unknown origin	none
2835	11	chr11:108201010	ATM	C	T	50/63	-	7762	7377	2459	R	cgT/cgC	-	NR	NR	none	NR	NR	none
2836	11	chr11:108216568	ATM	A	C	58/63	-	8902	8517	2839	F/L	ttC/ttA	rs767845728,COSM200681,COSM5009208	PATHOGENIC	PATHOGENIC	PATHOGENIC	Confirmed somatic variant	Confirmed somatic variant	Confirmed somatic variant
978	3	chr3:142168331	ATR	T	C	47/47	-	7997	7875	2625	Q	caG/caA	rs1802904	NR	NR	none	NR	NR	none
979	3	chr3:142176618	ATR	-	T	-	44/46	-	-	-	-	-	-	NR	NR	none	NR	NR	none
980	3	chr3:142176649	ATR	A	C	-	44/46	-	-	-	-	-	-	NR	NR	none	NR	NR	none
981	3	chr3:142178144	ATR	T	C	43/47	-	7396	7274	2425	R/Q	cGa/cAa	rs2229032,COSM149485	NR	NEUTRAL	none	NR	Confirmed somatic variant	Confirmed somatic variant
982	3	chr3:142186845	ATR	-	T	39/47	-	6740	6618	2206	K/X	aaA/aa	-	NR	NR	none	NR	NR	none
983	3	chr3:142212097	ATR	G	A	35/47	-	6077	5955	1985	P	ccT/ccC	rs866237669	NR	NR	none	NR	NR	none
984	3	chr3:142217537	ATR	G	A	32/47	-	5582	5460	1820	Y	taT/taC	rs2227932	NR	NR	none	NR	NR	none
985	3	chr3:142222284	ATR	G	A	30/47	-	5330	5208	1736	Y	taT/taC	rs2227931,COSM4002479	PATHOGENIC	PATHOGENIC	PATHOGENIC	Confirmed somatic variant	Confirmed somatic variant	Confirmed somatic variant
986	3	chr3:142224107	ATR	A	G	29/47	-	5192	5070	1690	A	gcC/gcT	rs142881746,COSM5624534	NR	NR	none	NR	NR	none
987	3	chr3:142242985	ATR	T	C	22/47	-	4124	4002	1334	Q	caG/caA	rs56026468,COSM5575579	NR	PATHOGENIC	PATHOGENIC	NR	Confirmed somatic variant	Confirmed somatic variant
988	3	chr3:142243071	ATR	T	C	-	21/46	-	-	-	-	-	rs369747235	NR	NR	none	NR	NR	none
989	3	chr3:142257306	ATR	C	T	-	19/46	-	-	-	-	-	rs73864554	NR	NR	none	NR	NR	none
990	3	chr3:142269075	ATR	T	C	14/47	-	2997	2875	959	V/M	Gtg/Atg	rs28910271,COSM1579027	NEUTRAL	NEUTRAL	none	Reported in another cancer sample as somatic	Confirmed somatic variant	Confirmed somatic variant
991	3	chr3:142269112	ATR	G	C	14/47	-	2960	2838	946	M/I	atG/atC	-	NR	NR	none	NR	NR	none
992	3	chr3:142272276	ATR	AC	-	-	12/46	-	-	-	-	-	rs142950892	NR	NR	none	NR	NR	none
993	3	chr3:142272314	ATR	A	G	-	12/46	-	-	-	-	-	rs9869842	NR	NR	none	NR	NR	none
994	3	chr3:142272647	ATR	A	T	-	11/46	-	-	-	-	-	-	NR	NR	none	NR	NR	none
995	3	chr3:142274652	ATR	A	C	-	10/46	-	-	-	-	-	-	NR	NR	none	NR	NR	none
996	3	chr3:142275353	ATR	T	C	9/47	-	2072	1950	650	E	gaG/gaA	rs28910270,COSM1579028	NEUTRAL	NEUTRAL	none	Reported in another cancer sample as somatic	Confirmed somatic variant	Confirmed somatic variant
997	3	chr3:142277536	ATR	G	A	8/47	-	1937	1815	605	D	gaT/gaC	rs2227929,COSM4002481	NEUTRAL	NEUTRAL	none	Confirmed somatic variant	Confirmed somatic variant	Confirmed somatic variant
998	3	chr3:142277575	ATR	T	A	8/47	-	1898	1776	592	G	ggT/ggA	rs2227930,COSM149486	NEUTRAL	NEUTRAL	none	Confirmed somatic variant	Confirmed somatic variant	Confirmed somatic variant
999	3	chr3:142279235	ATR	G	C	6/47	-	1533	1411	471	E/Q	Gaa/Caa	rs371350410	NR	NR	none	NR	NR	none
1000	3	chr3:142280108	ATR	C	T	5/47	-	1448	1326	442	K	aaA/aaG	rs28897765,COSM1579029	NEUTRAL	NEUTRAL	none	Reported in another cancer sample as somatic	Confirmed somatic variant	Confirmed somatic variant
1001	3	chr3:142281298	ATR	T	C	4/47	-	1068	946	316	V/I	Gtc/Atc	rs28897764,COSM1579030	PATHOGENIC	PATHOGENIC	PATHOGENIC	Reported in another cancer sample as somatic	Confirmed somatic variant	Confirmed somatic variant
1002	3	chr3:142281353	ATR	G	C	4/47	-	1013	891	297	K/N	aaG/aaC	rs2229033,COSM5020184	NR	PATHOGENIC	PATHOGENIC	NR	Confirmed somatic variant	Confirmed somatic variant
1003	3	chr3:142281612	ATR	G	A	4/47	-	754	632	211	M/T	aTg/aCg	rs2227928,COSM149487	NEUTRAL	NEUTRAL	none	Reported in another cancer sample as somatic	Confirmed somatic variant	Confirmed somatic variant
1004	3	chr3:142281620	ATR	T	A	4/47	-	746	624	208	T	acT/acA	rs866939836	NR	NR	none	NR	NR	none
1005	3	chr3:142281761	ATR	C	T	4/47	-	605	483	161	R	agA/agG	rs182268224	NR	NR	none	NR	NR	none
1006	3	chr3:142281971	ATR	A	G	-	3/46	-	-	-	-	-	rs115097590	NR	NR	none	NR	NR	none
1007	3	chr3:142281994	ATR	T	C	-	3/46	-	-	-	-	-	rs112718453	NR	NR	none	NR	NR	none
1008	3	chr3:142287047	ATR	A	T	-	1/46	-	-	-	-	-	rs62276447	NR	NR	none	NR	NR	none
4236	23	chrX:76849165	ATRX	T	C	-	26/34	-	-	-	-	-	-	NR	NR	none	NR	NR	none
4237	23	chrX:76855054	ATRX	AAAC	-	-	24/34	-	-	-	-	-	rs782735894	NR	NR	none	NR	NR	none
4238	23	chrX:76937963	ATRX	C	G	9/35	-	3000	2785	929	Q/E	Cag/Gag	rs3088074,COSM3759544	NEUTRAL	NEUTRAL	none	Confirmed somatic variant	Confirmed somatic variant	Confirmed somatic variant
4239	23	chrX:76952030	ATRX	T	C	-	5/34	-	-	-	-	-	rs45494097	NR	NR	none	NR	NR	none
4043	20	chr20:54945209	AURKA	A	G	11/11	-	1783	-	-	-	-	rs35436934	NR	NR	none	NR	NR	none
4044	20	chr20:54945211	AURKA	G	T	11/11	-	1781	-	-	-	-	rs34361943	NR	NR	none	NR	NR	none
4045	20	chr20:54959296	AURKA	C	G	-	6/10	-	-	-	-	-	rs2298016	NR	NR	none	NR	NR	none
4046	20	chr20:54959349	AURKA	T	-	6/11	-	917-918	351-352	117-118	-/X	-/A	-	NR	NR	none	NR	NR	none
4047	20	chr20:54961463	AURKA	T	C	5/11	-	735	169	57	I/V	Att/Gtt	rs1047972,CM051389	NR	NR	none	NR	NR	none
4048	20	chr20:54961541	AURKA	T	A	5/11	-	657	91	31	F/I	Ttt/Att	rs2273535,CM042940	NR	NR	none	NR	NR	none
4049	20	chr20:54961674	AURKA	G	A	-	4/10	-	-	-	-	-	rs559998244	NR	NR	none	NR	NR	none
3584	17	chr17:8108331	AURKB	G	A	9/9	-	987	893	298	M/T	aTg/aCg	rs1059476	NR	NR	none	NR	NR	none
3585	17	chr17:8108339	AURKB	A	G	9/9	-	979	885	295	S	tcC/tcT	rs2241909	NR	NR	none	NR	NR	none
3586	17	chr17:8109871	AURKB	C	T	7/9	-	718	624	208	L	ttA/ttG	-	NR	NR	none	NR	NR	none
3587	17	chr17:8110130	AURKB	-	G	6/9	-	569	475	159	R/X	Cgc/gc	COSM5924679,COSM5924680	NR	PATHOGENIC	PATHOGENIC	NR	Confirmed somatic variant	Confirmed somatic variant
3588	17	chr17:8110940	AURKB	A	G	4/9	-	249	155	52	A/V	gCc/gTc	rs55878091,CM1210017	NR	NR	none	NR	NR	none
3998	19	chr19:57742668	AURKC	A	G	1/7	-	238	52	18	E/K	Gaa/Aaa	rs777213018	NR	NR	none	NR	NR	none
3999	19	chr19:57744792	AURKC	T	C	-	4/6	-	-	-	-	-	-	NR	NR	none	NR	NR	none
4000	19	chr19:57746617	AURKC	G	A	7/7	-	948	762	254	V	gtA/gtG	rs55898757	NR	NR	none	NR	NR	none
3955	19	chr19:41743861	AXL	G	A	7/20	-	986	796	266	N/D	Aac/Gac	rs7249222	NR	NR	none	NR	NR	none
3956	19	chr19:41759474	AXL	T	C	-	16/19	-	-	-	-	-	rs73045223	NR	NR	none	NR	NR	none
3957	19	chr19:41762393	AXL	T	C	18/20	-	2263	2073	691	F	ttC/ttT	rs750332848,COSM996979	NR	NEUTRAL	none	NR	Variant of unknown origin	none
3958	19	chr19:41762525	AXL	G	A	-	18/19	-	-	-	-	-	rs2304232	NR	NR	none	NR	NR	none
4060	21	chr21:11058322	BAGE2	T	C	3/10	-	326	-	-	-	-	rs2951027	NR	NR	none	NR	NR	none
1601	6	chr6:69349192	BAI3	A	G	3/32	-	1446	625	209	D/N	Gac/Aac	-	NR	NR	none	NR	NR	none
1602	6	chr6:69653858	BAI3	C	T	6/32	-	1988	1167	389	H	caT/caC	rs774970282	NR	NR	none	NR	NR	none
1603	6	chr6:69666684	BAI3	G	A	8/32	-	2329	1508	503	N/S	aAt/aGt	rs1932618	NR	NR	none	NR	NR	none
1604	6	chr6:69685184	BAI3	A	G	10/32	-	2507	1686	562	P	ccG/ccA	rs148136685	NR	NR	none	NR	NR	none
1605	6	chr6:69703767	BAI3	G	C	11/32	-	2663	1842	614	G	ggC/ggG	rs144610317,COSM3697934	NR	NR	none	NR	NR	none
1606	6	chr6:69758066	BAI3	T	-	-	13/31	-	-	-	-	-	rs1409042598	NR	NR	none	NR	NR	none
1607	6	chr6:69758072	BAI3	T	A	-	13/31	-	-	-	-	-	rs3757049	NR	NR	none	NR	NR	none
1608	6	chr6:69772809	BAI3	C	T	-	15/31	-	-	-	-	-	rs13207626	NR	NR	none	NR	NR	none
1609	6	chr6:69772817	BAI3	G	C	-	15/31	-	-	-	-	-	rs2793459	NR	NR	none	NR	NR	none
1610	6	chr6:69944886	BAI3	G	A	-	18/31	-	-	-	-	-	rs779461	NR	NR	none	NR	NR	none
1611	6	chr6:70064183	BAI3	A	C	27/32	-	4339	3518	1173	S/Y	tCt/tAt	COSM1081155	NR	NR	none	NR	NR	none
1612	6	chr6:70064187	BAI3	A	G	27/32	-	4343	3522	1174	S	tcG/tcA	rs2296974	NR	NR	none	NR	NR	none
1613	6	chr6:70071050	BAI3	T	C	29/32	-	4706	3885	1295	D	gaC/gaT	rs61740403	NR	NR	none	NR	NR	none
1614	6	chr6:70071173	BAI3	A	G	29/32	-	4829	4008	1336	P	ccG/ccA	rs913543	NR	NR	none	NR	NR	none
1615	6	chr6:70071243	BAI3	G	A	29/32	-	4899	4078	1360	N/D	Aat/Gat	-	NR	NR	none	NR	NR	none
894	3	chr3:52437748	BAP1	C	A	13/17	-	1885	1413	471	A	gcT/gcG	rs34736117	NR	NR	none	NR	NR	none
895	3	chr3:52440427	BAP1	T	C	-	8/16	-	-	-	-	-	rs369980498	NR	NR	none	NR	NR	none
896	3	chr3:52440855	BAP1	T	C	8/17	-	1121	649	217	A/T	Gcc/Acc	COSM6912836	NR	PATHOGENIC	PATHOGENIC	NR	Confirmed somatic variant	Confirmed somatic variant
111	1	chr1:85733370	BCL10	C	A	3/3	-	1380	642	214	T	acT/acG	-	NR	NR	none	NR	NR	none
112	1	chr1:85733374	BCL10	T	C	3/3	-	1376	638	213	G/E	gGa/gAa	rs3768235	NR	NR	none	NR	NR	none
113	1	chr1:85736596	BCL10	T	G	-	1/2	-	-	-	-	-	-	NR	NR	none	NR	NR	none
114	1	chr1:85741921	BCL10	C	G	-	1/2	-	-	-	-	-	rs2735594	NR	NR	none	NR	NR	none
115	1	chr1:85741968	BCL10	C	G	-	1/2	-	-	-	-	-	rs12562182	NR	NR	none	NR	NR	none
116	1	chr1:85742012	BCL10	C	G	1/3	-	762	24	8	L	ctC/ctG	rs11576939,CM062460	NR	NR	none	NR	NR	none
117	1	chr1:85742023	BCL10	A	C	1/3	-	751	13	5	A/S	Gca/Tca	rs12037217,CM062459	NR	NR	none	NR	NR	none
556	2	chr2:60679641	BCL11A	A	G	-	-	-	-	-	-	-	rs763161073	NR	NR	none	NR	NR	none
557	2	chr2:60687959	BCL11A	G	A	4/4	-	2316	2088	696	S	agT/agC	rs7569946	NR	NR	none	NR	NR	none
558	2	chr2:60773062	BCL11A	G	A	-	2/3	-	-	-	-	-	-	NR	NR	none	NR	NR	none
559	2	chr2:60773146	BCL11A	G	C	2/4	-	573	345	115	T	acG/acC	COSM378730,COSM378731	NR	PATHOGENIC	PATHOGENIC	NR	Variant of unknown origin	none
560	2	chr2:60773269	BCL11A	A	G	2/4	-	450	222	74	S	agC/agT	rs764771964	NR	NR	none	NR	NR	none
3163	14	chr14:99640905	BCL11B	A	G	4/4	-	2278	2268	756	P	ccC/ccT	rs74649889,COSM7259204	NEUTRAL	NEUTRAL	none	Confirmed somatic variant	Confirmed somatic variant	Confirmed somatic variant
3164	14	chr14:99642360	BCL11B	G	C	4/4	-	823	813	271	P	ccG/ccC	rs1152783	NR	NR	none	NR	NR	none
3165	14	chr14:99723872	BCL11B	A	G	2/4	-	373	363	121	P	ccC/ccT	rs370892505,COSM6610650	NEUTRAL	NEUTRAL	none	Confirmed somatic variant	Confirmed somatic variant	Confirmed somatic variant
3166	14	chr14:99724154	BCL11B	A	G	2/4	-	91	81	27	A	gcC/gcT	rs190782742	NR	NR	none	NR	NR	none
3858	18	chr18:60985879	BCL2	C	T	1/2	-	1483	21	7	T	acA/acG	rs1801018	NR	NR	none	NR	NR	none
4001	20	chr20:30310005	BCL2L1	T	C	2/3	-	428	17	6	R/Q	cGg/cAg	rs148274815	NR	NR	none	NR	NR	none
3080	14	chr14:23777099	BCL2L2	A	G	2/8	-	444	123	41	P	ccG/ccA	rs2231301	NR	NR	none	NR	NR	none
3081	14	chr14:23777374	BCL2L2	A	G	2/8	-	719	398	133	Q/R	cAg/cGg	rs910332	NR	NR	none	NR	NR	none
3082	14	chr14:23778198	BCL2L2	A	G	4/4	-	835	-	-	-	-	rs2231302	NR	NR	none	NR	NR	none
3967	19	chr19:45259573	BCL3	T	C	3/9	-	739	495	165	L	ctC/ctT	rs1428320197	NR	NR	none	NR	NR	none
3968	19	chr19:45260419	BCL3	A	G	4/9	-	909	665	222	R/Q	cGa/cAa	rs763828094,COSM4916338	NR	NR	none	NR	NR	none
3969	19	chr19:45260554	BCL3	C	T	-	4/8	-	-	-	-	-	rs11880948	NR	NR	none	NR	NR	none
3970	19	chr19:45261705	BCL3	T	C	-	7/8	-	-	-	-	-	rs34967149	NR	NR	none	NR	NR	none
3971	19	chr19:45262090	BCL3	A	G	8/9	-	1413	1169	390	S/N	aGc/aAc	rs141697775	NR	NR	none	NR	NR	none
3972	19	chr19:45262848	BCL3	A	C	9/9	-	1585	1341	447	P	ccC/ccA	rs139295630	NR	NR	none	NR	NR	none
1023	3	chr3:187440264	BCL6	T	C	10/10	-	2470	2103	701	E	gaG/gaA	rs1345353543,COSM6423738	NR	PATHOGENIC	PATHOGENIC	NR	Confirmed somatic variant	Confirmed somatic variant
1024	3	chr3:187440364	BCL6	T	C	10/10	-	2370	2003	668	R/H	cGt/cAt	rs1426858162,COSM6841348	NR	PATHOGENIC	PATHOGENIC	NR	Confirmed somatic variant	Confirmed somatic variant
1025	3	chr3:187442661	BCL6	T	C	-	9/9	-	-	-	-	-	rs114017848	NR	NR	none	NR	NR	none
1026	3	chr3:187442663	BCL6	CTCCACCTCCTTCCCTGCC	-	-	9/9	-	-	-	-	-	rs199744143	NR	NR	none	NR	NR	none
1027	3	chr3:187443314	BCL6	A	G	8/10	-	2179	1812	604	C	tgC/tgT	rs61732778,COSM5817657	NR	PATHOGENIC	PATHOGENIC	NR	Confirmed somatic variant	Confirmed somatic variant
1028	3	chr3:187446211	BCL6	T	C	6/10	-	1844	1477	493	A/T	Gct/Act	rs2229362	NR	NR	none	NR	NR	none
1029	3	chr3:187446335	BCL6	G	A	-	5/9	-	-	-	-	-	rs113668878	NR	NR	none	NR	NR	none
1030	3	chr3:187447019	BCL6	A	G	5/10	-	1541	1174	392	P/S	Cca/Tca	-	NR	NR	none	NR	NR	none
1031	3	chr3:187447032	BCL6	A	G	5/10	-	1528	1161	387	N	aaC/aaT	rs1056932	NR	NR	none	NR	NR	none
1032	3	chr3:187447701	BCL6	A	C	5/10	-	859	492	164	E/D	gaG/gaT	rs61752081	NR	NR	none	NR	NR	none
1033	3	chr3:187449447	BCL6	T	C	-	4/9	-	-	-	-	-	rs41268623	NR	NR	none	NR	NR	none
292	1	chr1:147087721	BCL9	A	T	-	7/9	-	-	-	-	-	rs3737843	NR	NR	none	NR	NR	none
293	1	chr1:147090697	BCL9	T	C	8/10	-	1476	736	246	Q/*	Cag/Tag	-	NR	NR	none	NR	NR	none
294	1	chr1:147090866	BCL9	A	G	8/10	-	1645	905	302	G/D	gGt/gAt	rs142428017	NR	NR	none	NR	NR	none
295	1	chr1:147090956	BCL9	T	C	8/10	-	1735	995	332	P/L	cCg/cTg	rs61751616	NR	NR	none	NR	NR	none
296	1	chr1:147091495	BCL9	T	C	8/10	-	2274	1534	512	R/*	Cga/Tga	COSM6610781	PATHOGENIC	NR	PATHOGENIC	Confirmed somatic variant	NR	Confirmed somatic variant
297	1	chr1:147091972	BCL9	T	C	8/10	-	2751	2011	671	P/S	Cct/Tct	rs3820129	NR	NR	none	NR	NR	none
298	1	chr1:147094034	BCL9	T	A	-	8/9	-	-	-	-	-	-	NR	NR	none	NR	NR	none
299	1	chr1:147096505	BCL9	T	C	10/10	-	4766	4026	1342	P	ccC/ccT	rs77650336	NR	NR	none	NR	NR	none
4090	22	chr22:23523630	BCR	A	C	1/23	-	1234	483	161	I	atC/atA	rs5751602	NR	NR	none	NR	NR	none
4091	22	chr22:23595996	BCR	T	C	2/23	-	2041	1290	430	F	ttC/ttT	rs56092735	NR	NR	none	NR	NR	none
4092	22	chr22:23615801	BCR	G	A	-	7/22	-	-	-	-	-	rs12233352	NR	NR	none	NR	NR	none
4093	22	chr22:23627256	BCR	A	G	10/23	-	3025	2274	758	P	ccG/ccA	rs35727393	NR	NR	none	NR	NR	none
4094	22	chr22:23627369	BCR	G	A	10/23	-	3138	2387	796	N/S	aAt/aGt	rs140504,CM057927	NR	NR	none	NR	NR	none
4095	22	chr22:23632513	BCR	G	A	-	13/22	-	-	-	-	-	rs16802	NR	NR	none	NR	NR	none
4096	22	chr22:23637200	BCR	C	T	-	15/22	-	-	-	-	-	rs2239666	NR	NR	none	NR	NR	none
4097	22	chr22:23655084	BCR	T	C	20/23	-	4084	3333	1111	D	gaC/gaT	rs11558697	NR	NR	none	NR	NR	none
4098	22	chr22:23656148	BCR	G	T	-	20/22	-	-	-	-	-	rs66569843	NR	NR	none	NR	NR	none
4099	22	chr22:23657691	BCR	C	G	23/23	-	4549	3798	1266	L	ctG/ctC	rs1314023714	NR	NR	none	NR	NR	none
4100	22	chr22:23657735	BCR	A	G	23/23	-	4593	-	-	-	-	rs180812	NR	NR	none	NR	NR	none
2800	11	chr11:102248166	BIRC2	G	A	-	6/8	-	-	-	-	-	rs1177839293	NR	NR	none	NR	NR	none
2801	11	chr11:102248377	BIRC2	T	C	7/9	-	2916	1517	506	A/V	gCg/gTg	rs34510872	NR	NR	none	NR	NR	none
2793	11	chr11:102195293	BIRC3	C	A	2/9	-	2803	53	18	N/T	aAc/aCc	-	NR	NR	none	NR	NR	none
2794	11	chr11:102195501	BIRC3	G	A	2/9	-	3011	261	87	K	aaA/aaG	rs7930386	NR	NR	none	NR	NR	none
2795	11	chr11:102195716	BIRC3	T	G	2/9	-	3226	476	159	R/I	aGa/aTa	-	NR	NR	none	NR	NR	none
2796	11	chr11:102201890	BIRC3	C	T	6/9	-	3992	1242	414	N	aaT/aaC	-	NR	NR	none	NR	NR	none
2797	11	chr11:102207645	BIRC3	A	C	9/9	-	4377	1627	543	P/T	Cca/Aca	-	NR	NR	none	NR	NR	none
2798	11	chr11:102207653	BIRC3	C	A	9/9	-	4385	1635	545	E/D	gaA/gaC	-	NR	NR	none	NR	NR	none
2799	11	chr11:102207681	BIRC3	C	A	9/9	-	4413	1663	555	R	Aga/Cga	rs57261191	NR	NR	none	NR	NR	none
3718	17	chr17:76210367	BIRC5	C	G	1/5	-	101	-	-	-	-	rs9904341,CR087414	NR	NR	none	NR	NR	none
3719	17	chr17:76210389	BIRC5	A	G	1/5	-	123	-	-	-	-	-	NR	NR	none	NR	NR	none
3720	17	chr17:76212752	BIRC5	T	C	4/5	-	429	298	100	H/Y	Cat/Tat	rs762005531	NR	NR	none	NR	NR	none
3721	17	chr17:76219591	BIRC5	A	G	5/5	-	585	454	152	E/K	Gag/Aag	rs2071214	NR	NR	none	NR	NR	none
3722	17	chr17:76219645	BIRC5	T	C	5/5	-	639	-	-	-	-	-	NR	NR	none	NR	NR	none
3723	17	chr17:76219739	BIRC5	A	G	5/5	-	733	-	-	-	-	rs17882627	NR	NR	none	NR	NR	none
3059	13	chr13:103504517	BIVM-ERCC5	C	T	2/15	-	1561	138	46	H	caT/caC	rs1047768	NR	NR	none	NR	NR	none
3060	13	chr13:103513944	BIVM-ERCC5	G	A	7/15	-	2183	760	254	M/V	Atg/Gtg	rs1047769	NR	NR	none	NR	NR	none
3061	13	chr13:103513951	BIVM-ERCC5	G	A	7/15	-	2190	767	256	Q/R	cAg/cGg	rs4150313	NR	NR	none	NR	NR	none
3062	13	chr13:103514091	BIVM-ERCC5	T	C	-	7/14	-	-	-	-	-	rs7982448	NR	NR	none	NR	NR	none
3069	13	chr13:103527849	BIVM-ERCC5	C	G	15/15	-	4580	3157	1053	G/R	Gga/Cga	rs9514066	NR	NR	none	NR	NR	none
3070	13	chr13:103527930	BIVM-ERCC5	C	G	15/15	-	4661	3238	1080	G/R	Gga/Cga	rs9514067	NR	NR	none	NR	NR	none
3071	13	chr13:103528002	BIVM-ERCC5	C	G	15/15	-	4733	3310	1104	D/H	Gat/Cat	rs17655,CM063964,COSM3676556	NR	PATHOGENIC	PATHOGENIC	NR	Confirmed somatic variant	Confirmed somatic variant
3289	15	chr15:91292917	BLM	G	A	3/22	-	537	419	140	E/G	gAa/gGa	rs35886055	NR	NR	none	NR	NR	none
3290	15	chr15:91304139	BLM	-	A	7/22	-	1654	1536	512	G/X	ggA/gg	rs772495493,TMP_ESP_15_91304139_91304139,COSM252959	0	NR	none	Confirmed somatic variant	NR	Confirmed somatic variant
3291	15	chr15:91304145	BLM	T	A	7/22	-	1660	1542	514	K/N	aaA/aaT	-	NR	NR	none	NR	NR	none
3292	15	chr15:91304325	BLM	G	A	7/22	-	1840	1722	574	L	ttA/ttG	rs28385011	NR	NR	none	NR	NR	none
3293	15	chr15:91312313	BLM	A	G	-	10/21	-	-	-	-	-	rs17273206	NR	NR	none	NR	NR	none
3294	15	chr15:91312388	BLM	G	C	11/22	-	2451	2333	778	S/C	tCt/tGt	rs139610577	NR	NR	none	NR	NR	none
3295	15	chr15:91326099	BLM	T	C	13/22	-	2721	2603	868	P/L	cCg/cTg	rs2227935,CM102917	NR	NR	none	NR	NR	none
3296	15	chr15:91337479	BLM	A	G	16/22	-	3220	3102	1034	T	acG/acA	rs2227933	NR	NR	none	NR	NR	none
3297	15	chr15:91337624	BLM	-	T	-	16/21	-	-	-	-	-	rs3214113	NR	NR	none	NR	NR	none
3298	15	chr15:91346923	BLM	A	C	18/22	-	3649	3531	1177	A	gcC/gcA	rs2227934	NR	NR	none	NR	NR	none
3299	15	chr15:91347493	BLM	A	C	19/22	-	3773	3655	1219	L/I	Ctt/Att	-	NR	NR	none	NR	NR	none
3300	15	chr15:91354505	BLM	T	C	21/22	-	4063	3945	1315	L	ctC/ctT	rs1063147	NR	NR	none	NR	NR	none
3301	15	chr15:91354521	BLM	A	G	21/22	-	4079	3961	1321	V/I	Gta/Ata	rs7167216,COSM4416980,COSM6926499	NR	NEUTRAL	none	NR	Confirmed somatic variant	Confirmed somatic variant
3302	15	chr15:91354640	BLM	G	T	-	21/21	-	-	-	-	-	rs183176301	NR	NR	none	NR	NR	none
3303	15	chr15:91358272	BLM	GAA	-	-	21/21	-	-	-	-	-	rs10685387	NR	NR	none	NR	NR	none
3304	15	chr15:91358461	BLM	A	G	22/22	-	4324	4206	1402	P	ccG/ccA	rs775975894,COSM4605339	NR	NEUTRAL	none	NR	Confirmed somatic variant	Confirmed somatic variant
2655	10	chr10:97951715	BLNK	-	T	17/17	-	1527	-	-	-	-	rs782515286	NR	NR	none	NR	NR	none
2656	10	chr10:97956830	BLNK	A	T	-	15/16	-	-	-	-	-	rs74151283	NR	NR	none	NR	NR	none
2657	10	chr10:97975168	BLNK	-	TA	-	2020-07-16	-	-	-	-	-	-	NR	NR	none	NR	NR	none
2658	10	chr10:97987265	BLNK	T	C	5/17	-	404	262	88	A/T	Gcc/Acc	rs144903484	NR	NR	none	NR	NR	none
2659	10	chr10:97990583	BLNK	G	A	4/17	-	313	171	57	P	ccT/ccC	rs727852	NR	NR	none	NR	NR	none
2660	10	chr10:98002435	BLNK	G	A	-	3/16	-	-	-	-	-	rs377149860	NR	NR	none	NR	NR	none
2661	10	chr10:98031065	BLNK	-	A	-	1/16	-	-	-	-	-	rs545970363	NR	NR	none	NR	NR	none
2662	10	chr10:98031160	BLNK	C	T	1/17	-	138	-	-	-	-	rs7916154	NR	NR	none	NR	NR	none
2631	10	chr10:88659758	BMPR1A	A	T	-	6/12	-	-	-	-	-	rs7920259	NR	NR	none	NR	NR	none
2632	10	chr10:88676945	BMPR1A	T	C	9/13	-	1267	730	244	R/*	Cga/Tga	rs759363072,COSM6954486,COSM6954487	PATHOGENIC	NR	PATHOGENIC	Confirmed somatic variant	NR	Confirmed somatic variant
2633	10	chr10:88681353	BMPR1A	A	G	11/13	-	1780	1243	415	E/K	Gaa/Aaa	rs140592056,CM135235	NR	NR	none	NR	NR	none
2634	10	chr10:88683122	BMPR1A	C	T	-	11/12	-	-	-	-	-	rs7074064	NR	NR	none	NR	NR	none
2060	7	chr7:140449150	BRAF	C	T	16/18	-	1990	1929	643	G	ggA/ggG	rs9648696,COSM4161857	0	NR	none	Confirmed somatic variant	NR	Confirmed somatic variant
2061	7	chr7:140453077	BRAF	C	T	15/18	-	1919	1858	620	M/V	Atg/Gtg	rs1296245849	NR	NR	none	NR	NR	none
2062	7	chr7:140476936	BRAF	A	G	-	12/17	-	-	-	-	-	rs62487918	NR	NR	none	NR	NR	none
2063	7	chr7:140481411	BRAF	T	C	11/18	-	1458	1397	466	G/E	gGa/gAa	rs121913351,CM115083,COSM451,COSM452,COSM453	PATHOGENIC	PATHOGENIC	PATHOGENIC	Confirmed somatic variant	Confirmed somatic variant	Confirmed somatic variant
2064	7	chr7:140500135	BRAF	T	C	-	7/17	-	-	-	-	-	rs41282721	NR	NR	none	NR	NR	none
2065	7	chr7:140534324	BRAF	-	AAGT	-	3/17	-	-	-	-	-	rs571456666	NR	NR	none	NR	NR	none
2527	9	chr9:136898820	BRD3	T	G	12/12	-	2259	2073	691	P	ccC/ccA	rs56166940	NR	NR	none	NR	NR	none
2528	9	chr9:136905119	BRD3	A	G	-	9/11	-	-	-	-	-	rs114525584	NR	NR	none	NR	NR	none
2529	9	chr9:136907005	BRD3	A	G	8/12	-	1470	1284	428	P	ccC/ccT	rs467387,COSM3763733,COSM3763734	NEUTRAL	NEUTRAL	none	Confirmed somatic variant	Confirmed somatic variant	Confirmed somatic variant
2530	9	chr9:136907108	BRD3	A	G	-	7/11	-	-	-	-	-	rs467317	NR	NR	none	NR	NR	none
2531	9	chr9:136910350	BRD3	A	C	-	7/11	-	-	-	-	-	rs17151357	NR	NR	none	NR	NR	none
2532	9	chr9:136910445	BRD3	A	G	7/12	-	1371	1185	395	H	caC/caT	rs145953326	NR	NR	none	NR	NR	none
2533	9	chr9:136913123	BRD3	G	C	-	6/11	-	-	-	-	-	rs460888	NR	NR	none	NR	NR	none
2534	9	chr9:136913355	BRD3	C	T	6/12	-	1122	936	312	L	ctA/ctG	rs464826,COSM4163507,COSM4163508	NR	NEUTRAL	none	NR	Confirmed somatic variant	Confirmed somatic variant
2535	9	chr9:136915508	BRD3	T	C	5/12	-	888	702	234	P	ccG/ccA	rs2301576,COSM4163509,COSM4163510	NR	NEUTRAL	none	NR	Confirmed somatic variant	Confirmed somatic variant
3691	17	chr17:59760648	BRIP1	C	T	20/20	-	4027	-	-	-	-	-	NR	NR	none	NR	NR	none
3693	17	chr17:59761304	BRIP1	A	G	20/20	-	3371	3103	1035	R/C	Cgt/Tgt	rs45437094,COSM6930399,COSM6930400	NR	NEUTRAL	none	NR	Confirmed somatic variant	Confirmed somatic variant
3697	17	chr17:59858190	BRIP1	T	G	-	12/19	-	-	-	-	-	-	NR	NR	none	NR	NR	none
3698	17	chr17:59861596	BRIP1	A	T	-	11/19	-	-	-	-	-	-	NR	NR	none	NR	NR	none
4243	23	chrX:100615478	BTK	T	C	-	8/18	-	-	-	-	-	rs2855259	NR	NR	none	NR	NR	none
3207	15	chr15:40453428	BUB1B	A	G	1/23	-	202	7	3	A/T	Gcg/Acg	rs752991610	NR	NR	none	NR	NR	none
3208	15	chr15:40453430	BUB1B	T	G	1/23	-	204	9	3	A	gcG/gcT	rs7168394	NR	NR	none	NR	NR	none
3209	15	chr15:40457239	BUB1B	T	-	-	1/22	-	-	-	-	-	rs150031754	NR	NR	none	NR	NR	none
3210	15	chr15:40462780	BUB1B	A	G	4/23	-	477	282	94	K	aaG/aaA	rs1801389	NR	NR	none	NR	NR	none
3211	15	chr15:40462846	BUB1B	C	T	4/23	-	543	348	116	Y	taT/taC	rs28989189	NR	NR	none	NR	NR	none
3212	15	chr15:40468866	BUB1B	A	C	5/23	-	768	573	191	S	tcC/tcA	rs138809057	NR	NR	none	NR	NR	none
3213	15	chr15:40476132	BUB1B	A	-	-	6/22	-	-	-	-	-	rs141276285	NR	NR	none	NR	NR	none
3214	15	chr15:40477788	BUB1B	C	G	8/23	-	1198	1003	335	A/P	Gct/Cct	rs145184714	NR	NR	none	NR	NR	none
3215	15	chr15:40477831	BUB1B	A	G	8/23	-	1241	1046	349	R/Q	cGa/cAa	rs1801376,CM062484	NR	NR	none	NR	NR	none
3216	15	chr15:40488851	BUB1B	A	G	9/23	-	1359	1164	388	A	gcG/gcA	rs1047130	NR	NR	none	NR	NR	none
3217	15	chr15:40488857	BUB1B	C	G	9/23	-	1365	1170	390	E/D	gaG/gaC	rs1017842	NR	NR	none	NR	NR	none
3218	15	chr15:40491952	BUB1B	G	A	-	10/22	-	-	-	-	-	rs2172742	NR	NR	none	NR	NR	none
3219	15	chr15:40492521	BUB1B	T	C	11/23	-	1673	1478	493	T/I	aCt/aTt	rs146795655	NR	NR	none	NR	NR	none
3220	15	chr15:40494952	BUB1B	T	A	-	14/22	-	-	-	-	-	rs2412482	NR	NR	none	NR	NR	none
3221	15	chr15:40494960	BUB1B	C	A	-	14/22	-	-	-	-	-	rs12898804	NR	NR	none	NR	NR	none
3222	15	chr15:40498503	BUB1B	C	T	15/23	-	2048	1853	618	V/A	gTa/gCa	rs1801528	NR	NR	none	NR	NR	none
3223	15	chr15:40510662	BUB1B	T	C	22/23	-	3051	2856	952	D	gaC/gaT	rs1802286	NR	NR	none	NR	NR	none
3224	15	chr15:40512906	BUB1B	G	A	23/23	-	3294	3099	1033	K	aaA/aaG	rs35611758	NR	NR	none	NR	NR	none
1843	7	chr7:2946461	CARD11	C	T	25/25	-	3680	3276	1092	R	cgA/cgG	rs1124581,COSM3762618	NEUTRAL	NEUTRAL	none	Confirmed somatic variant	Confirmed somatic variant	Confirmed somatic variant
1844	7	chr7:2951824	CARD11	G	A	23/25	-	3530	3126	1042	I	atT/atC	rs2301921,COSM3685158	NR	NEUTRAL	none	NR	Confirmed somatic variant	Confirmed somatic variant
1845	7	chr7:2952886	CARD11	T	C	-	22/24	-	-	-	-	-	rs1626708	NR	NR	none	NR	NR	none
1846	7	chr7:2952887	CARD11	A	G	-	22/24	-	-	-	-	-	rs149821690	NR	NR	none	NR	NR	none
1847	7	chr7:2956918	CARD11	A	C	-	20/24	-	-	-	-	-	rs3735123,COSM5019356	NR	NEUTRAL	none	NR	Confirmed somatic variant	Confirmed somatic variant
1848	7	chr7:2957005	CARD11	C	T	20/25	-	3026	2622	874	P	ccA/ccG	rs3735124,COSM5019288	NR	NEUTRAL	none	NR	Confirmed somatic variant	Confirmed somatic variant
1849	7	chr7:2959172	CARD11	A	G	18/25	-	2748	2344	782	L	Ctg/Ttg	rs3735126,COSM5019286	NR	PATHOGENIC	PATHOGENIC	NR	Confirmed somatic variant	Confirmed somatic variant
1850	7	chr7:2962293	CARD11	G	C	17/25	-	2648	2244	748	T	acG/acC	rs3735131,COSM4768833	NR	NEUTRAL	none	NR	Confirmed somatic variant	Confirmed somatic variant
1851	7	chr7:2962753	CARD11	A	G	-	16/24	-	-	-	-	-	rs2527509	NR	NR	none	NR	NR	none
1852	7	chr7:2962934	CARD11	A	G	16/25	-	2378	1974	658	H	caC/caT	rs752956052,COSM4669235	NEUTRAL	NEUTRAL	none	Confirmed somatic variant	Confirmed somatic variant	Confirmed somatic variant
1853	7	chr7:2963786	CARD11	T	C	-	15/24	-	-	-	-	-	rs150887589	NR	NR	none	NR	NR	none
1854	7	chr7:2966445	CARD11	G	T	-	13/24	-	-	-	-	-	rs1182136	NR	NR	none	NR	NR	none
1855	7	chr7:2968269	CARD11	C	T	13/25	-	2121	1717	573	I/V	Atc/Gtc	-	NR	NR	none	NR	NR	none
1856	7	chr7:2968291	CARD11	A	G	13/25	-	2099	1695	565	A	gcC/gcT	rs41454944	NR	NR	none	NR	NR	none
1857	7	chr7:2974165	CARD11	T	C	10/25	-	1844	1440	480	S	tcG/tcA	rs41396348	NR	NR	none	NR	NR	none
1858	7	chr7:2976767	CARD11	A	G	9/25	-	1649	1245	415	D	gaC/gaT	rs6945582,COSM4162140	NR	NEUTRAL	none	NR	Confirmed somatic variant	Confirmed somatic variant
1859	7	chr7:2979448	CARD11	T	G	6/25	-	1203	799	267	L/M	Ctg/Atg	COSM6915596	PATHOGENIC	NR	PATHOGENIC	Confirmed somatic variant	NR	Confirmed somatic variant
1860	7	chr7:2979559	CARD11	A	C	6/25	-	1092	688	230	D/Y	Gat/Tat	COSM41657	NR	PATHOGENIC	PATHOGENIC	NR	Confirmed somatic variant	Confirmed somatic variant
1861	7	chr7:2985586	CARD11	G	C	4/25	-	629	225	75	R	cgG/cgC	rs10229368,COSM5019424	NR	NEUTRAL	none	NR	Confirmed somatic variant	Confirmed somatic variant
3225	15	chr15:40897227	CASC5	C	T	-	2/26	-	-	-	-	-	rs369277095	NR	NR	none	NR	NR	none
3226	15	chr15:40898643	CASC5	C	G	4/27	-	518	128	43	R/T	aGa/aCa	rs7177192	NR	NR	none	NR	NR	none
3227	15	chr15:40901081	CASC5	T	C	5/27	-	562	172	58	R/*	Cga/Tga	COSM961230,COSM961231	NR	NR	none	NR	NR	none
3228	15	chr15:40913189	CASC5	G	A	11/27	-	1195	805	269	I/V	Att/Gtt	rs76371152	NR	NR	none	NR	NR	none
3229	15	chr15:40913840	CASC5	T	G	11/27	-	1846	1456	486	A/S	Gct/Tct	rs2412541	NR	NR	none	NR	NR	none
3230	15	chr15:40913884	CASC5	T	G	11/27	-	1890	1500	500	E/D	gaG/gaT	-	NR	NR	none	NR	NR	none
3231	15	chr15:40914177	CASC5	C	T	11/27	-	2183	1793	598	M/T	aTg/aCg	rs11858113	NR	NR	none	NR	NR	none
3232	15	chr15:40914279	CASC5	G	A	11/27	-	2285	1895	632	K/R	aAa/aGa	rs371943910	NR	NR	none	NR	NR	none
3233	15	chr15:40914772	CASC5	T	C	11/27	-	2778	2388	796	V	gtC/gtT	rs11855334	NR	NR	none	NR	NR	none
3234	15	chr15:40914795	CASC5	G	A	11/27	-	2801	2411	804	E/G	gAa/gGa	rs748968333	NR	NR	none	NR	NR	none
3235	15	chr15:40914831	CASC5	G	C	11/27	-	2837	2447	816	T/S	aCt/aGt	rs33931006	NR	NR	none	NR	NR	none
3236	15	chr15:40915045	CASC5	G	T	11/27	-	3051	2661	887	T	acT/acG	rs8041534	NR	NR	none	NR	NR	none
3237	15	chr15:40915190	CASC5	G	A	11/27	-	3196	2806	936	R/G	Agg/Ggg	rs8040502	NR	NR	none	NR	NR	none
3238	15	chr15:40915894	CASC5	C	T	11/27	-	3900	3510	1170	N	aaT/aaC	rs11070285	NR	NR	none	NR	NR	none
3239	15	chr15:40916237	CASC5	G	A	11/27	-	4243	3853	1285	K/E	Aaa/Gaa	rs17747633	NR	NR	none	NR	NR	none
3240	15	chr15:40917733	CASC5	G	C	11/27	-	5739	5349	1783	C/W	tgC/tgG	rs191249840	NR	NR	none	NR	NR	none
3241	15	chr15:40917890	CASC5	A	G	-	11/26	-	-	-	-	-	rs535397796	NR	NR	none	NR	NR	none
3242	15	chr15:40920731	CASC5	G	A	-	12/26	-	-	-	-	-	rs569501922	NR	NR	none	NR	NR	none
3243	15	chr15:40949526	CASC5	T	C	-	24/26	-	-	-	-	-	rs2412544	NR	NR	none	NR	NR	none
3244	15	chr15:40949531	CASC5	-	TTTT	-	24/26	-	-	-	-	-	-	NR	NR	none	NR	NR	none
2848	11	chr11:119103316	CBL	C	T	2/16	-	730	354	118	F	ttT/ttC	rs1289071252	NR	NR	none	NR	NR	none
2849	11	chr11:119145464	CBL	-	TT	-	2020-04-15	-	-	-	-	-	-	NR	NR	none	NR	NR	none
2850	11	chr11:119145466	CBL	G	T	-	4/15	-	-	-	-	-	rs539447357	NR	NR	none	NR	NR	none
2851	11	chr11:119146659	CBL	C	G	-	5/15	-	-	-	-	-	rs2511854	NR	NR	none	NR	NR	none
2852	11	chr11:119148573	CBL	T	G	-	7/15	-	-	-	-	-	rs2510152	NR	NR	none	NR	NR	none
2853	11	chr11:119149011	CBL	T	C	-	8/15	-	-	-	-	-	rs201747825,COSM34064	NR	NEUTRAL	none	NR	Variant of unknown origin	none
2854	11	chr11:119169128	CBL	T	A	15/16	-	2688	2312	771	D/V	gAt/gTt	rs199788586	NR	NR	none	NR	NR	none
2759	11	chr11:69455962	CCND1	T	C	1/5	-	108	-	-	-	-	rs371975839	NR	NR	none	NR	NR	none
2760	11	chr11:69456000	CCND1	C	G	1/5	-	146	-	-	-	-	rs55911137	NR	NR	none	NR	NR	none
2761	11	chr11:69462856	CCND1	T	C	4/5	-	896	669	223	F	ttC/ttT	rs3862792	NR	NR	none	NR	NR	none
2762	11	chr11:69462910	CCND1	A	G	4/5	-	950	723	241	P	ccG/ccA	rs9344,CS004528	NR	NR	none	NR	NR	none
2763	11	chr11:69465860	CCND1	G	A	-	4/4	-	-	-	-	-	rs3212892	NR	NR	none	NR	NR	none
2764	11	chr11:69466115	CCND1	A	C	5/5	-	1180	-	-	-	-	rs7177	NR	NR	none	NR	NR	none
2866	12	chr12:4388084	CCND2	G	C	3/5	-	839	570	190	T	acC/acG	rs3217805	NR	NR	none	NR	NR	none
3945	19	chr19:30308328	CCNE1	A	G	6/12	-	621	342	114	E	gaG/gaA	rs201895026	NR	NR	none	NR	NR	none
3946	19	chr19:30308385	CCNE1	C	T	6/12	-	678	399	133	F	ttT/ttC	rs3218045	NR	NR	none	NR	NR	none
3947	19	chr19:30308425	CCNE1	G	A	6/12	-	718	439	147	I/V	Att/Gtt	rs113246237	NR	NR	none	NR	NR	none
3948	19	chr19:30314666	CCNE1	T	C	12/12	-	1494	1215	405	S	agC/agT	rs7257694	NR	NR	none	NR	NR	none
3959	19	chr19:42381369	CD79A	A	G	1/5	-	180	-	-	-	-	rs191391314	NR	NR	none	NR	NR	none
3960	19	chr19:42383220	CD79A	A	C	2/5	-	425	240	80	F/L	ttC/ttA	COSM997139	NR	NEUTRAL	none	NR	Confirmed somatic variant	Confirmed somatic variant
3702	17	chr17:62007498	CD79B	G	A	3/6	-	444	369	123	C	tgT/tgC	rs2070776,COSM148316	NEUTRAL	NEUTRAL	none	Confirmed somatic variant	Confirmed somatic variant	Confirmed somatic variant
3703	17	chr17:62007552	CD79B	A	G	3/6	-	390	315	105	L	ctC/ctT	rs116625909	NR	NR	none	NR	NR	none
391	1	chr1:193110968	CDC73	G	A	-	6/16	-	-	-	-	-	-	NR	NR	none	NR	NR	none
392	1	chr1:193111048	CDC73	T	G	7/17	-	765	581	194	R/I	aGa/aTa	,COSM901383	PATHOGENIC	PATHOGENIC	PATHOGENIC	Confirmed somatic variant	Reported in another cancer sample as somatic	Confirmed somatic variant			endometrium
393	1	chr1:193111251	CDC73	A	G	-	7/16	-	-	-	-	-	-	NR	NR	none	NR	NR	none
394	1	chr1:193117124	CDC73	T	A	-	8/16	-	-	-	-	-	rs138541554	NR	NR	none	NR	NR	none
3458	16	chr16:68771372	CDH1	T	C	-	1/15	-	-	-	-	-	rs3743674,COSM5461723	NEUTRAL	NEUTRAL	none	Confirmed somatic variant	Confirmed somatic variant	Confirmed somatic variant
3459	16	chr16:68835733	CDH1	G	A	3/16	-	515	324	108	R	agA/agG	rs116542018,COSM6971314	NR	NEUTRAL	none	NR	Confirmed somatic variant	Confirmed somatic variant
3460	16	chr16:68842480	CDH1	C	G	-	4/15	-	-	-	-	-	rs33963999,COSM5020197	NR	NEUTRAL	none	NR	Confirmed somatic variant	Confirmed somatic variant
3461	16	chr16:68842734	CDH1	T	C	5/16	-	861	670	224	R/C	Cgc/Tgc	rs200310662,COSM1379142	NEUTRAL	NEUTRAL	none	Reported in another cancer sample as somatic	Reported in another cancer sample as somatic	none
3462	16	chr16:68844081	CDH1	T	C	-	5/15	-	-	-	-	-	-	NR	NR	none	NR	NR	none
3463	16	chr16:68844193	CDH1	A	G	6/16	-	972	781	261	E/K	Gaa/Aaa	rs121964873,COSM19759,COSM972786	NR	NEUTRAL	none	NR	Confirmed somatic variant	Confirmed somatic variant
3464	16	chr16:68845646	CDH1	A	G	7/16	-	1083	892	298	A/T	Gcc/Acc	rs142822590,CM041745	NR	NR	none	NR	NR	none
3465	16	chr16:68856088	CDH1	T	C	12/16	-	2087	1896	632	H	caC/caT	rs33969373,COSM4129242	NR	NEUTRAL	none	NR	Confirmed somatic variant	Confirmed somatic variant
3466	16	chr16:68857289	CDH1	C	T	-	12/15	-	-	-	-	-	rs2276330,CS1312282	NR	NR	none	NR	NR	none
3467	16	chr16:68857441	CDH1	C	T	13/16	-	2267	2076	692	A	gcT/gcC	rs1801552,COSM3755010	NEUTRAL	NEUTRAL	none	Confirmed somatic variant	Confirmed somatic variant	Confirmed somatic variant
3468	16	chr16:68862117	CDH1	A	G	14/16	-	2396	2205	735	A	gcG/gcA	rs138493551,COSM4062186	NR	NEUTRAL	none	NR	Confirmed somatic variant	Confirmed somatic variant
3469	16	chr16:68862165	CDH1	T	C	14/16	-	2444	2253	751	N	aaC/aaT	rs33964119,COSM20775,COSM6953299	NEUTRAL	NEUTRAL	none	Confirmed somatic variant	Confirmed somatic variant	Confirmed somatic variant
3470	16	chr16:68862193	CDH1	A	G	14/16	-	2472	2281	761	G/R	Gga/Aga	rs779648243	NR	NR	none	NR	NR	none
3471	16	chr16:68863630	CDH1	T	C	15/16	-	2560	2369	790	T/I	aCc/aTc	rs587780120,COSM5833157	NR	NR	none	NR	NR	none
3472	16	chr16:68867387	CDH1	T	C	16/16	-	2825	2634	878	G	ggC/ggT	rs2229044,COSM5019289	NR	NEUTRAL	none	NR	Confirmed somatic variant	Confirmed somatic variant
3436	16	chr16:64984954	CDH11	G	A	-	11/12	-	-	-	-	-	rs1370022186	NR	NR	none	NR	NR	none
3437	16	chr16:65005395	CDH11	C	T	-	11/12	-	-	-	-	-	rs3785315	NR	NR	none	NR	NR	none
3438	16	chr16:65005462	CDH11	A	G	-	11/12	-	-	-	-	-	rs12597529	NR	NR	none	NR	NR	none
3439	16	chr16:65015908	CDH11	G	C	-	8/12	-	-	-	-	-	rs35214	NR	NR	none	NR	NR	none
3440	16	chr16:65016087	CDH11	A	C	8/13	-	1733	1117	373	S/A	Tca/Gca	rs35213	NR	NR	none	NR	NR	none
3441	16	chr16:65022114	CDH11	T	C	7/13	-	1561	945	315	S	tcG/tcA	rs28216	NR	NR	none	NR	NR	none
3442	16	chr16:65022156	CDH11	A	G	7/13	-	1519	903	301	G	ggC/ggT	rs55854547	NR	NR	none	NR	NR	none
3443	16	chr16:65022234	CDH11	T	C	7/13	-	1441	825	275	M/I	atG/atA	rs1130821	NR	NR	none	NR	NR	none
3444	16	chr16:65025658	CDH11	C	T	-	6/12	-	-	-	-	-	rs35196	NR	NR	none	NR	NR	none
3445	16	chr16:65025718	CDH11	A	G	6/13	-	1380	764	255	T/M	aCg/aTg	rs35195	NR	NR	none	NR	NR	none
3446	16	chr16:65025762	CDH11	A	G	6/13	-	1336	720	240	D	gaC/gaT	rs200272504	NR	NR	none	NR	NR	none
3447	16	chr16:65025800	CDH11	A	C	6/13	-	1298	682	228	A/S	Gcc/Tcc	rs148083048	NR	NR	none	NR	NR	none
3448	16	chr16:65026991	CDH11	G	T	-	4/12	-	-	-	-	-	-	NR	NR	none	NR	NR	none
3449	16	chr16:65038674	CDH11	A	G	3/13	-	715	99	33	P	ccC/ccT	rs35182	NR	NR	none	NR	NR	none
3789	18	chr18:25532080	CDH2	A	G	16/16	-	3182	-	-	-	-	rs11564422	NR	NR	none	NR	NR	none
3790	18	chr18:25532304	CDH2	C	T	16/16	-	2958	2534	845	N/S	aAt/aGt	rs2289664,CM136820	NR	NR	none	NR	NR	none
3791	18	chr18:25543387	CDH2	A	G	15/16	-	2872	2448	816	A	gcC/gcT	rs1041985	NR	NR	none	NR	NR	none
3792	18	chr18:25562831	CDH2	T	C	-	14/15	-	-	-	-	-	rs8092870	NR	NR	none	NR	NR	none
3793	18	chr18:25565082	CDH2	A	G	13/16	-	2515	2091	697	R	cgT/cgC	rs1220144	NR	NR	none	NR	NR	none
3794	18	chr18:25568610	CDH2	A	G	11/16	-	2043	1619	540	P/L	cCt/cTt	COSM3524709	NR	PATHOGENIC	PATHOGENIC	NR	Confirmed somatic variant	Confirmed somatic variant
3795	18	chr18:25570228	CDH2	C	G	10/16	-	1855	1431	477	P	ccC/ccG	rs1628684	NR	NR	none	NR	NR	none
3796	18	chr18:25572625	CDH2	T	C	9/16	-	1762	1338	446	V	gtG/gtA	rs1483922474	NR	NR	none	NR	NR	none
3797	18	chr18:25572642	CDH2	T	C	9/16	-	1745	1321	441	D/N	Gac/Aac	rs781246502	NR	NR	none	NR	NR	none
3798	18	chr18:25573622	CDH2	C	G	-	7/15	-	-	-	-	-	rs2957286	NR	NR	none	NR	NR	none
3799	18	chr18:25573641	CDH2	G	T	-	7/15	-	-	-	-	-	rs756816992	NR	NR	none	NR	NR	none
3800	18	chr18:25589803	CDH2	A	G	5/16	-	1004	580	194	R/W	Cgg/Tgg	rs1228174771	NR	NR	none	NR	NR	none
3801	18	chr18:25589869	CDH2	A	G	-	4/15	-	-	-	-	-	-	NR	NR	none	NR	NR	none
3802	18	chr18:25593694	CDH2	T	C	3/16	-	776	352	118	A/T	Gca/Aca	rs17445840	NR	NR	none	NR	NR	none
3803	18	chr18:25593713	CDH2	C	G	3/16	-	757	333	111	T	acC/acG	rs41274322	NR	NR	none	NR	NR	none
3804	18	chr18:25593716	CDH2	A	C	3/16	-	754	330	110	E/D	gaG/gaT	-	NR	NR	none	NR	NR	none
3853	18	chr18:59157764	CDH20	C	T	2/12	-	376	-	-	-	-	rs680530	NR	NR	none	NR	NR	none
3854	18	chr18:59166541	CDH20	T	C	3/12	-	767	369	123	D	gaC/gaT	rs12964819	NR	NR	none	NR	NR	none
3855	18	chr18:59170304	CDH20	G	C	5/12	-	1178	780	260	V	gtC/gtG	rs595093	NR	NR	none	NR	NR	none
3856	18	chr18:59203707	CDH20	A	G	-	7/11	-	-	-	-	-	rs62097360	NR	NR	none	NR	NR	none
3857	18	chr18:59221876	CDH20	A	G	12/12	-	2752	2354	785	R/Q	cGg/cAg	-	NR	NR	none	NR	NR	none
3450	16	chr16:66420885	CDH5	T	C	3/12	-	532	384	128	G	ggC/ggT	rs1130844	NR	NR	none	NR	NR	none
3451	16	chr16:66420975	CDH5	A	G	3/12	-	622	474	158	A	gcG/gcA	rs757664765,COSM237173	NR	NEUTRAL	none	NR	Confirmed somatic variant	Confirmed somatic variant
3452	16	chr16:66426127	CDH5	T	C	7/12	-	1206	1058	353	A/V	gCg/gTg	rs755175346	NR	NR	none	NR	NR	none
3453	16	chr16:66426269	CDH5	T	G	7/12	-	1348	1200	400	A	gcG/gcT	COSM972155	NR	NEUTRAL	none	NR	Confirmed somatic variant	Confirmed somatic variant
3454	16	chr16:66432381	CDH5	C	T	10/12	-	1656	1508	503	I/T	aTa/aCa	rs16956504	NR	NR	none	NR	NR	none
3455	16	chr16:66432423	CDH5	C	T	2020-10-12	-	1698	1550	517	I/T	aTc/aCc	rs1049970,CM1212658	NR	NR	none	NR	NR	none
3456	16	chr16:66432463	CDH5	T	C	10/12	-	1738	1590	530	H	caC/caT	rs199816046	NR	NR	none	NR	NR	none
3457	16	chr16:66437131	CDH5	T	A	12/12	-	2562	-	-	-	-	rs1063438	NR	NR	none	NR	NR	none
3617	17	chr17:37627782	CDK12	G	T	2/14	-	1730	1697	566	L/R	cTg/cGg	-	NR	NR	none	NR	NR	none
3618	17	chr17:37650845	CDK12	T	C	5/14	-	2350	2317	773	R/C	Cgt/Tgt	COSM5583371	NR	PATHOGENIC	PATHOGENIC	NR	Confirmed somatic variant	Confirmed somatic variant
3619	17	chr17:37665992	CDK12	T	C	7/14	-	2677	2644	882	R/W	Cgg/Tgg	COSM4898992	PATHOGENIC	PATHOGENIC	PATHOGENIC	Confirmed somatic variant	Confirmed somatic variant	Confirmed somatic variant
3620	17	chr17:37671910	CDK12	A	G	-	8/13	-	-	-	-	-	rs8070799	NR	NR	none	NR	NR	none
3621	17	chr17:37682394	CDK12	A	G	13/14	-	3618	3585	1195	T	acG/acA	rs140167318	NR	NR	none	NR	NR	none
3622	17	chr17:37686920	CDK12	T	C	14/14	-	3857	3824	1275	P/L	cCg/cTg	rs34070318	NR	NR	none	NR	NR	none
2960	12	chr12:58143112	CDK4	-	AGG	-	6/7	-	-	-	-	-	-	NR	NR	none	NR	NR	none
2961	12	chr12:58144665	CDK4	T	C	-	4/7	-	-	-	-	-	rs2069502	NR	NR	none	NR	NR	none
2962	12	chr12:58145099	CDK4	T	C	3/8	-	611	245	82	R/Q	cGa/cAa	rs3211612	NR	NR	none	NR	NR	none
1940	7	chr7:92244631	CDK6	-	ATACA	-	7/7	-	-	-	-	-	rs3731387	NR	NR	none	NR	NR	none
1941	7	chr7:92247327	CDK6	T	G	-	7/7	-	-	-	-	-	rs3731375	NR	NR	none	NR	NR	none
1942	7	chr7:92247333	CDK6	G	A	-	7/7	-	-	-	-	-	rs42043	NR	NR	none	NR	NR	none
3018	13	chr13:26927833	CDK8	C	T	-	3/12	-	-	-	-	-	rs12184578	NR	NR	none	NR	NR	none
2401	9	chr9:21968199	CDKN2A	C	G	4/4	-	736	-	-	-	-	rs11515,COSM14251	NR	NR	none	NR	NR	none
2402	9	chr9:21970916	CDKN2A	T	C	2/4	-	481	442	148	A/T	Gcg/Acg	rs3731249,CM004869,COSM3736958,COSM3774361,COSM3774362	NR	NEUTRAL	none	NR	Confirmed somatic variant	Confirmed somatic variant
2403	9	chr9:21994158	CDKN2A	C	T	-	4/5	-	-	-	-	-	-	NR	NR	none	NR	NR	none
2404	9	chr9:22006060	CDKN2B	A	G	2/2	-	753	343	115	L	Ctg/Ttg	rs372284765	NR	NR	none	NR	NR	none
2405	9	chr9:22006082	CDKN2B	A	G	2/2	-	731	321	107	D	gaC/gaT	COSM5618683	NR	NEUTRAL	none	NR	Confirmed somatic variant	Confirmed somatic variant
98	1	chr1:51439777	CDKN2C	T	C	4/4	-	2376	342	114	G	ggC/ggT	rs1043141,COSM5020094	NR	NEUTRAL	none	NR	Confirmed somatic variant	Confirmed somatic variant
3949	19	chr19:33792280	CEBPA	T	C	1/1	-	1191	1041	347	E	gaG/gaA	rs141430731	NR	NR	none	NR	NR	none
2855	11	chr11:125497466	CHEK1	T	G	-	2/12	-	-	-	-	-	rs491528	NR	NR	none	NR	NR	none
2856	11	chr11:125499063	CHEK1	G	A	-	3/12	-	-	-	-	-	rs78170873	NR	NR	none	NR	NR	none
2857	11	chr11:125505291	CHEK1	-	ATTTAAAAAA	-	6/12	-	-	-	-	-	rs756486238	NR	NR	none	NR	NR	none
2858	11	chr11:125525195	CHEK1	A	G	13/13	-	1666	1411	471	I/V	Att/Gtt	rs506504	NR	NR	none	NR	NR	none
4109	22	chr22:29091178	CHEK2	A	C	13/16	-	1517	1441	481	D/Y	Gat/Tat	rs200050883,CM077522	NR	NR	none	NR	NR	none
4110	22	chr22:29130458	CHEK2	C	T	2/16	-	328	252	84	E	gaA/gaG	rs1805129	NR	NR	none	NR	NR	none
3961	19	chr19:42791062	CIC	T	C	2/20	-	247	207	69	N	aaC/aaT	-	NR	NR	none	NR	NR	none
3962	19	chr19:42791462	CIC	T	C	-	3/19	-	-	-	-	-	rs28469564,COSM5020911	NR	NEUTRAL	none	NR	Confirmed somatic variant	Confirmed somatic variant
3963	19	chr19:42793303	CIC	A	G	-	7/19	-	-	-	-	-	rs148819249	NR	NR	none	NR	NR	none
3964	19	chr19:42795554	CIC	C	T	10/20	-	2674	2634	878	A	gcT/gcC	rs10410185,COSM3756832	NEUTRAL	NEUTRAL	none	Confirmed somatic variant	Confirmed somatic variant	Confirmed somatic variant
3965	19	chr19:42798455	CIC	G	A	18/20	-	4366	4326	1442	T	acA/acG	-	NR	NR	none	NR	NR	none
3966	19	chr19:42798900	CIC	T	C	-	19/19	-	-	-	-	-	rs10410653	NR	NR	none	NR	NR	none
317	1	chr1:154947194	CKS1B	A	G	1/3	-	20	-	-	-	-	rs374349593	NR	NR	none	NR	NR	none
95	1	chr1:47834209	CMPK1	T	G	2/6	-	389	240	80	Q/H	caG/caT	rs35687416	NR	NR	none	NR	NR	none
96	1	chr1:47842356	CMPK1	G	A	-	5/5	-	-	-	-	-	rs181963933	NR	NR	none	NR	NR	none
97	1	chr1:47842431	CMPK1	A	G	6/6	-	850	-	-	-	-	rs3125648	NR	NR	none	NR	NR	none
3666	17	chr17:48264448	COL1A1	G	A	47/51	-	3578	3459	1153	D	gaT/gaC	rs1800218	NR	NR	none	NR	NR	none
3667	17	chr17:48265426	COL1A1	G	A	-	44/50	-	-	-	-	-	rs2586488	NR	NR	none	NR	NR	none
3668	17	chr17:48265475	COL1A1	G	A	44/51	-	3362	3243	1081	V	gtT/gtC	rs1800217	NR	NR	none	NR	NR	none
3669	17	chr17:48265495	COL1A1	T	C	44/51	-	3342	3223	1075	T/A	Acc/Gcc	rs1800215	NR	NR	none	NR	NR	none
3670	17	chr17:48266669	COL1A1	C	G	-	39/50	-	-	-	-	-	rs2586489	NR	NR	none	NR	NR	none
3671	17	chr17:48267861	COL1A1	A	G	-	34/50	-	-	-	-	-	rs144024364	NR	NR	none	NR	NR	none
3672	17	chr17:48268223	COL1A1	G	A	33/51	-	2417	2298	766	T	acT/acC	rs2734272	NR	NR	none	NR	NR	none
3673	17	chr17:48269302	COL1A1	G	A	-	30/50	-	-	-	-	-	rs2857396	NR	NR	none	NR	NR	none
3674	17	chr17:48269390	COL1A1	C	G	-	29/50	-	-	-	-	-	rs66592376,CD071303,CS063264	NR	NR	none	NR	NR	none
3675	17	chr17:48270137	COL1A1	A	C	-	27/50	-	-	-	-	-	rs555722335	NR	NR	none	NR	NR	none
3676	17	chr17:48271433	COL1A1	G	A	-	24/50	-	-	-	-	-	rs1007086	NR	NR	none	NR	NR	none
3677	17	chr17:48271904	COL1A1	C	G	-	22/50	-	-	-	-	-	rs41316653	NR	NR	none	NR	NR	none
3678	17	chr17:48272055	COL1A1	T	C	-	21/50	-	-	-	-	-	rs2253369	NR	NR	none	NR	NR	none
3679	17	chr17:48272469	COL1A1	C	G	-	19/50	-	-	-	-	-	rs41317361	NR	NR	none	NR	NR	none
3680	17	chr17:48273335	COL1A1	T	A	16/51	-	1124	1005	335	G	ggT/ggA	rs375914028,COSM4673645	PATHOGENIC	NR	PATHOGENIC	Confirmed somatic variant	NR	Confirmed somatic variant
3681	17	chr17:48273632	COL1A1	T	C	-	14/50	-	-	-	-	-	rs76055698	NR	NR	none	NR	NR	none
3682	17	chr17:48273903	COL1A1	C	A	-	12/50	-	-	-	-	-	rs17639446	NR	NR	none	NR	NR	none
3683	17	chr17:48274561	COL1A1	A	G	10/51	-	849	730	244	R/C	Cgt/Tgt	rs1435869455,COSM4067578	NR	PATHOGENIC	PATHOGENIC	NR	Confirmed somatic variant	Confirmed somatic variant
3684	17	chr17:48275285	COL1A1	G	A	-	8/50	-	-	-	-	-	rs73987448	NR	NR	none	NR	NR	none
3685	17	chr17:48275292	COL1A1	G	T	-	8/50	-	-	-	-	-	rs16948767	NR	NR	none	NR	NR	none
3686	17	chr17:48275489	COL1A1	G	A	-	7/50	-	-	-	-	-	rs35231764	NR	NR	none	NR	NR	none
3687	17	chr17:48276971	COL1A1	C	G	-	2/50	-	-	-	-	-	rs2256835	NR	NR	none	NR	NR	none
3688	17	chr17:48277060	COL1A1	-	GCCCCAGGCCCCAGGCCCCAG	-	2/50	-	-	-	-	-	rs150854949	NR	NR	none	NR	NR	none
3689	17	chr17:48277061	COL1A1	-	CCCCAGGCCCCAGGCCCCAGG	-	1950-02-01	-	-	-	-	-	-	NR	NR	none	NR	NR	none
762	3	chr3:3192525	CRBN	TAAC	-	11/11	-	1376-1377	-	-	-	-	rs4183	NR	NR	none	NR	NR	none
763	3	chr3:3194271	CRBN	C	A	10/11	-	1040	1017	339	S/R	agT/agG	-	NR	NR	none	NR	NR	none
764	3	chr3:3197871	CRBN	T	C	-	6/10	-	-	-	-	-	rs1705789	NR	NR	none	NR	NR	none
765	3	chr3:3197918	CRBN	G	A	6/11	-	758	735	245	Y	taT/taC	rs17027638	NR	NR	none	NR	NR	none
766	3	chr3:3197988	CRBN	G	C	-	5/10	-	-	-	-	-	-	NR	NR	none	NR	NR	none
767	3	chr3:3209242	CRBN	T	G	-	5/10	-	-	-	-	-	rs4685612	NR	NR	none	NR	NR	none
768	3	chr3:3215901	CRBN	A	G	3/11	-	242	219	73	H	caC/caT	rs1045309	NR	NR	none	NR	NR	none
769	3	chr3:3215954	CRBN	A	G	-	2/10	-	-	-	-	-	rs1669321	NR	NR	none	NR	NR	none
3342	16	chr16:3778427	CREBBP	C	T	31/31	-	7431	6621	2207	Q	caA/caG	rs55960450,COSM4060692	NR	NEUTRAL	none	NR	Confirmed somatic variant	Confirmed somatic variant
3343	16	chr16:3778882	CREBBP	T	C	31/31	-	6976	6166	2056	V/M	Gtg/Atg	rs1254881895,COSM6976134	NR	PATHOGENIC	PATHOGENIC	NR	Reported in another cancer sample as somatic	none
3344	16	chr16:3779378	CREBBP	A	G	31/31	-	6480	5670	1890	P	ccC/ccT	rs115594471,COSM4129053	NR	NEUTRAL	none	NR	Confirmed somatic variant	Confirmed somatic variant
3345	16	chr16:3786637	CREBBP	C	T	-	27/30	-	-	-	-	-	rs200934101	NR	NR	none	NR	NR	none
3346	16	chr16:3786642	CREBBP	A	G	-	27/30	-	-	-	-	-	rs201631062	NR	NR	none	NR	NR	none
3347	16	chr16:3788618	CREBBP	A	G	26/31	-	5146	4336	1446	R/C	Cgc/Tgc	rs398124146,COSM254625,COSM6977043,COSM88749	PATHOGENIC	PATHOGENIC	PATHOGENIC	Confirmed somatic variant	Confirmed somatic variant	Confirmed somatic variant
3348	16	chr16:3795292	CREBBP	T	G	22/31	-	4710	3900	1300	I	atC/atA	rs129974,COSM148008	NR	PATHOGENIC	PATHOGENIC	NR	Confirmed somatic variant	Confirmed somatic variant
3349	16	chr16:3795363	CREBBP	A	G	-	21/30	-	-	-	-	-	rs3025684,COSM148009	NR	NEUTRAL	none	NR	Variant of unknown origin	none
3350	16	chr16:3799539	CREBBP	C	T	-	21/30	-	-	-	-	-	rs55695906	NR	NR	none	NR	NR	none
3351	16	chr16:3807731	CREBBP	A	G	-	18/30	-	-	-	-	-	rs129995	NR	NR	none	NR	NR	none
3352	16	chr16:3820640	CREBBP	T	C	14/31	-	3621	2811	937	P	ccG/ccA	rs146168040,COSM970590	NR	NEUTRAL	none	NR	Confirmed somatic variant	Confirmed somatic variant
3353	16	chr16:3823822	CREBBP	C	T	13/31	-	3203	2393	798	Q/R	cAg/cGg	rs749642688	NR	NR	none	NR	NR	none
3354	16	chr16:3827533	CREBBP	T	C	-	11/30	-	-	-	-	-	rs73501781	NR	NR	none	NR	NR	none
3355	16	chr16:3827553	CREBBP	A	G	-	11/30	-	-	-	-	-	rs12051375	NR	NR	none	NR	NR	none
3356	16	chr16:3828172	CREBBP	G	A	10/31	-	2763	1953	651	Y	taT/taC	rs130003	NR	NR	none	NR	NR	none
3357	16	chr16:3828207	CREBBP	C	T	-	9/30	-	-	-	-	-	rs130004	NR	NR	none	NR	NR	none
3358	16	chr16:3831187	CREBBP	A	T	-	7/30	-	-	-	-	-	rs130018	NR	NR	none	NR	NR	none
3359	16	chr16:3831230	CREBBP	T	G	7/31	-	2461	1651	551	L/I	Ctt/Att	rs61753381	NR	NR	none	NR	NR	none
3360	16	chr16:3843610	CREBBP	G	T	4/31	-	1803	993	331	S	tcA/tcC	-	NR	NR	none	NR	NR	none
3361	16	chr16:3860640	CREBBP	G	A	3/31	-	1749	939	313	D	gaT/gaC	rs3025702	NR	NR	none	NR	NR	none
3362	16	chr16:3900637	CREBBP	T	C	2/31	-	1269	459	153	P	ccG/ccA	rs56388626	NR	NR	none	NR	NR	none
3941	19	chr19:18854887	CRTC1	A	G	-	2/14	-	-	-	-	-	rs754407799	NR	NR	none	NR	NR	none
3942	19	chr19:18876258	CRTC1	A	G	10/15	-	1004	979	327	V/I	Gtc/Atc	rs36070283	NR	NR	none	NR	NR	none
3943	19	chr19:18876309	CRTC1	G	A	10/15	-	1055	1030	344	T/A	Acc/Gcc	rs3746266	NR	NR	none	NR	NR	none
3944	19	chr19:18888150	CRTC1	T	C	15/15	-	1936	1911	637	A	gcC/gcT	rs78830644	NR	NR	none	NR	NR	none
1344	5	chr5:149433596	CSF1R	GA	TG	22/22	-	3246-3247	-	-	-	-	rs386693509	NR	NR	none	NR	NR	none
1345	5	chr5:149435759	CSF1R	A	G	-	18/21	-	-	-	-	-	rs216136	NR	NR	none	NR	NR	none
1346	5	chr5:149447771	CSF1R	A	G	-	11/21	-	-	-	-	-	rs34928010,COSM3683790,COSM3683791	NR	NEUTRAL	none	NR	Confirmed somatic variant	Confirmed somatic variant
1347	5	chr5:149450132	CSF1R	C	T	8/22	-	1377	1085	362	H/R	cAc/cGc	rs10079250,COSM5020476	NR	NR	none	NR	NR	none
1348	5	chr5:149456811	CSF1R	A	G	-	6/21	-	-	-	-	-	rs3829987	NR	NR	none	NR	NR	none
1349	5	chr5:149457678	CSF1R	A	G	5/22	-	1018	726	242	T	acC/acT	rs2228422,COSM4159635	NR	NEUTRAL	none	NR	Confirmed somatic variant	Confirmed somatic variant
1350	5	chr5:149459839	CSF1R	C	G	4/22	-	660	368	123	A/G	gCa/gGa	rs140924076	NR	NR	none	NR	NR	none
1351	5	chr5:149460343	CSF1R	A	G	3/22	-	586	294	98	H	caC/caT	rs17652007,COSM35672,COSM3683792	NR	NEUTRAL	none	NR	Confirmed somatic variant	Confirmed somatic variant
1352	5	chr5:149460355	CSF1R	A	G	3/22	-	574	282	94	S	agC/agT	rs41287102,COSM5495001	NR	NR	none	NR	NR	none
1353	5	chr5:149460553	CSF1R	G	A	3/22	-	376	84	28	P	ccT/ccC	rs216123,COSM4407262	NR	NEUTRAL	none	NR	Confirmed somatic variant	Confirmed somatic variant
2285	8	chr8:113237045	CSMD3	T	C	71/71	-	11324	11079	3693	A	gcG/gcA	rs4876458	NR	NR	none	NR	NR	none
2286	8	chr8:113243855	CSMD3	A	C	69/71	-	10992	10747	3583	A/S	Gct/Tct	rs1398496415	NR	NR	none	NR	NR	none
2287	8	chr8:113246736	CSMD3	G	T	-	67/70	-	-	-	-	-	rs111698347	NR	NR	none	NR	NR	none
2288	8	chr8:113254072	CSMD3	-	CGCA	-	65/70	-	-	-	-	-	rs150177556	NR	NR	none	NR	NR	none
2289	8	chr8:113254073	CSMD3	A	G	-	65/70	-	-	-	-	-	rs1007815	NR	NR	none	NR	NR	none
2290	8	chr8:113254074	CSMD3	CA	-	-	65/70	-	-	-	-	-	rs1491509985	NR	NR	none	NR	NR	none
2291	8	chr8:113254080	CSMD3	-	CACACACG	-	65/70	-	-	-	-	-	-	NR	NR	none	NR	NR	none
2292	8	chr8:113254086	CSMD3	-	CG	-	65/70	-	-	-	-	-	rs1491446354	NR	NR	none	NR	NR	none
2293	8	chr8:113254087	CSMD3	A	G	-	65/70	-	-	-	-	-	rs1548987	NR	NR	none	NR	NR	none
2294	8	chr8:113277705	CSMD3	A	T	60/71	-	9868	9623	3208	N/I	aAt/aTt	rs61759499	NR	NR	none	NR	NR	none
2295	8	chr8:113299275	CSMD3	G	A	-	58/70	-	-	-	-	-	rs10505181	NR	NR	none	NR	NR	none
2296	8	chr8:113301795	CSMD3	TTA	ATT	-	56/70	-	-	-	-	-	-	NR	NR	none	NR	NR	none
2297	8	chr8:113301796	CSMD3	-	T	-	56/70	-	-	-	-	-	rs767401878	NR	NR	none	NR	NR	none
2298	8	chr8:113303799	CSMD3	G	A	56/71	-	9159	8914	2972	S/P	Tct/Cct	rs138666266	NR	NR	none	NR	NR	none
2299	8	chr8:113304783	CSMD3	C	G	55/71	-	9016	8771	2924	P/R	cCt/cGt	rs1409639853	NR	NR	none	NR	NR	none
2300	8	chr8:113308243	CSMD3	G	A	-	53/70	-	-	-	-	-	rs4876462	NR	NR	none	NR	NR	none
2301	8	chr8:113317005	CSMD3	C	G	52/71	-	8456	8211	2737	I/M	atC/atG	rs141863300	NR	NR	none	NR	NR	none
2302	8	chr8:113323397	CSMD3	G	T	-	49/70	-	-	-	-	-	-	NR	NR	none	NR	NR	none
2303	8	chr8:113347559	CSMD3	A	G	45/71	-	7409	7164	2388	H	caC/caT	rs61754528,COSM3395069,COSM3395070	NR	NEUTRAL	none	NR	Confirmed somatic variant	Confirmed somatic variant
2304	8	chr8:113347652	CSMD3	A	G	45/71	-	7316	7071	2357	T	acC/acT	rs113449703,COSM1137800,COSM485976	NR	NEUTRAL	none	NR	Confirmed somatic variant	Confirmed somatic variant
2305	8	chr8:113349063	CSMD3	A	G	-	43/70	-	-	-	-	-	rs369645933,COSM3163613,COSM3163614	NR	NEUTRAL	none	NR	Confirmed somatic variant	Confirmed somatic variant
2306	8	chr8:113363350	CSMD3	C	T	-	40/70	-	-	-	-	-	rs7003308	NR	NR	none	NR	NR	none
2307	8	chr8:113363511	CSMD3	C	T	-	39/70	-	-	-	-	-	rs7003500	NR	NR	none	NR	NR	none
2308	8	chr8:113364696	CSMD3	G	A	39/71	-	6449	6204	2068	Y	taT/taC	rs11778209,COSM3685297,COSM3685298	NR	PATHOGENIC	PATHOGENIC	NR	Confirmed somatic variant	Confirmed somatic variant
2309	8	chr8:113516209	CSMD3	A	G	-	29/70	-	-	-	-	-	rs10955625,COSM1721765,COSM1721766,COSM7220651,COSM7220652	NR	NR	none	NR	NR	none
2310	8	chr8:113516210	CSMD3	-	A	-	29/70	-	-	-	-	-	rs776487254,COSM1181053,COSM1181054	0	NR	none	Confirmed somatic variant	NR	Confirmed somatic variant
2311	8	chr8:113516216	CSMD3	G	A	-	29/70	-	-	-	-	-	-	NR	NR	none	NR	NR	none
2312	8	chr8:113562965	CSMD3	G	A	27/71	-	4744	4499	1500	I/T	aTa/aCa	rs200017659	NR	NR	none	NR	NR	none
2313	8	chr8:113568949	CSMD3	G	T	-	25/70	-	-	-	-	-	-	NR	NR	none	NR	NR	none
2314	8	chr8:113662583	CSMD3	C	A	-	18/70	-	-	-	-	-	rs17652171	NR	NR	none	NR	NR	none
2315	8	chr8:113668453	CSMD3	G	A	18/71	-	3179	2934	978	S	agT/agC	rs11992014	NR	NR	none	NR	NR	none
2316	8	chr8:113694624	CSMD3	C	T	-	16/70	-	-	-	-	-	rs373595593	NR	NR	none	NR	NR	none
2317	8	chr8:113702131	CSMD3	G	A	14/71	-	2366	2121	707	N	aaT/aaC	rs16883953	NR	NR	none	NR	NR	none
2318	8	chr8:113841946	CSMD3	T	C	12/71	-	2073	1828	610	E/K	Gaa/Aaa	rs760004671,COSM1700528,COSM1700529	NR	PATHOGENIC	PATHOGENIC	NR	Confirmed somatic variant	Confirmed somatic variant
2319	8	chr8:113841971	CSMD3	G	A	12/71	-	2048	1803	601	D	gaT/gaC	rs142880481,COSM4162605,COSM4162606	NR	NEUTRAL	none	NR	Reported in another cancer sample as somatic	none
2320	8	chr8:113988178	CSMD3	A	C	7/71	-	1475	1230	410	T	acG/acT	rs113972313,COSM4408866,COSM4408867	NR	NEUTRAL	none	NR	Confirmed somatic variant	Confirmed somatic variant
2321	8	chr8:114111084	CSMD3	C	G	5/71	-	1063	818	273	A/G	gCa/gGa	rs371855136,COSM1623547,COSM1623548	NR	PATHOGENIC	PATHOGENIC	NR	Reported in another cancer sample as somatic	none
2322	8	chr8:114111250	CSMD3	T	G	-	4/70	-	-	-	-	-	rs2030506	NR	NR	none	NR	NR	none
2323	8	chr8:114186003	CSMD3	C	T	4/71	-	902	657	219	I/M	atA/atG	rs2219898,COSM3982360,COSM3982361	NR	PATHOGENIC	PATHOGENIC	NR	Confirmed somatic variant	Confirmed somatic variant
2324	8	chr8:114327058	CSMD3	C	T	-	1/70	-	-	-	-	-	rs187245935	NR	NR	none	NR	NR	none
2325	8	chr8:114327077	CSMD3	G	A	-	1/70	-	-	-	-	-	rs567312329	NR	NR	none	NR	NR	none
2326	8	chr8:114388945	CSMD3	A	G	-	1/70	-	-	-	-	-	rs17609383	NR	NR	none	NR	NR	none
1337	5	chr5:138147949	CTNNA1	G	T	5/18	-	636	546	182	P	ccT/ccG	rs28363395	NR	NR	none	NR	NR	none
1338	5	chr5:138221989	CTNNA1	C	G	-	8/17	-	-	-	-	-	rs288028,COSM4407415	NR	NR	none	NR	NR	none
1339	5	chr5:138260284	CTNNA1	C	A	12/18	-	1722	1632	544	A	gcA/gcC	rs777464189	NR	NR	none	NR	NR	none
1340	5	chr5:138266523	CTNNA1	G	A	16/18	-	2287	2197	733	K/E	Aaa/Gaa	-	NR	NR	none	NR	NR	none
1341	5	chr5:138266546	CTNNA1	A	G	16/18	-	2310	2220	740	S	tcG/tcA	rs1059110,COSM3760934	NEUTRAL	NEUTRAL	none	Confirmed somatic variant	Confirmed somatic variant	Confirmed somatic variant
1342	5	chr5:138266552	CTNNA1	G	C	16/18	-	2316	2226	742	V	gtC/gtG	rs11552052,COSM5020299	NR	NEUTRAL	none	NR	Confirmed somatic variant	Confirmed somatic variant
1343	5	chr5:138269717	CTNNA1	-	AGA	18/18	-	2750-2752	2660-2662	887-888	QK/Q	cAGAag/cag	-	NR	NR	none	NR	NR	none
853	3	chr3:41267196	CTNNB1	A	C	6/15	-	1060	780	260	H/Q	caC/caA	-	NR	NR	none	NR	NR	none
854	3	chr3:41275179	CTNNB1	T	C	9/15	-	1625	1345	449	R/C	Cgt/Tgt	rs771596917,COSM317204	NR	PATHOGENIC	PATHOGENIC	NR	Confirmed somatic variant	Confirmed somatic variant
855	3	chr3:41275350	CTNNB1	T	C	9/15	-	1796	1516	506	L	Ctg/Ttg	rs3856748	NR	NR	none	NR	NR	none
856	3	chr3:41277275	CTNNB1	T	C	11/15	-	2024	1744	582	R/W	Cgg/Tgg	COSM2987971	PATHOGENIC	NR	PATHOGENIC	Confirmed somatic variant	NR	Confirmed somatic variant
3423	16	chr16:50783536	CYLD	T	A	2/18	-	132	-	-	-	-	rs1433528720	NR	NR	none	NR	NR	none
3424	16	chr16:50820880	CYLD	A	G	-	12/17	-	-	-	-	-	rs762990204	NR	NR	none	NR	NR	none
3425	16	chr16:50826462	CYLD	T	G	-	14/17	-	-	-	-	-	rs10451132	NR	NR	none	NR	NR	none
3426	16	chr16:50827518	CYLD	T	C	16/18	-	2617	2412	804	D	gaC/gaT	rs2066852,COSM5020076	NR	NEUTRAL	none	NR	Confirmed somatic variant	Confirmed somatic variant
2647	10	chr10:96522393	CYP2C19	C	T	1/9	-	13	-	-	-	-	rs17886301	NR	NR	none	NR	NR	none
2648	10	chr10:96522561	CYP2C19	C	T	1/9	-	181	99	33	P	ccT/ccC	rs17885098	NR	NR	none	NR	NR	none
2649	10	chr10:96535124	CYP2C19	G	A	-	2/8	-	-	-	-	-	rs12769205	NR	NR	none	NR	NR	none
2650	10	chr10:96541616	CYP2C19	A	G	5/9	-	763	681	227	P	ccG/ccA	rs4244285,CS941458	NR	NR	none	NR	NR	none
2651	10	chr10:96541627	CYP2C19	G	A	5/9	-	774	692	231	N/S	aAc/aGc	-	NR	NR	none	NR	NR	none
2652	10	chr10:96541628	CYP2C19	T	C	5/9	-	775	693	231	N	aaC/aaT	rs770126483	NR	NR	none	NR	NR	none
2653	10	chr10:96602622	CYP2C19	T	C	7/9	-	1072	990	330	V	gtC/gtT	rs3758580	NR	NR	none	NR	NR	none
2654	10	chr10:96602623	CYP2C19	A	G	7/9	-	1073	991	331	V/I	Gtt/Att	rs3758581,CM983294	NR	NR	none	NR	NR	none
4169	22	chr22:42522613	CYP2D6	C	G	9/9	-	1572	1457	486	T/S	aCc/aGc	rs1135840,CM931123	NR	NR	none	NR	NR	none
4170	22	chr22:42523528	CYP2D6	T	C	7/9	-	1209	1094	365	R/H	cGc/cAc	rs1058172	NR	NR	none	NR	NR	none
4171	22	chr22:42523539	CYP2D6	G	A	7/9	-	1198	1083	361	H	caT/caC	rs28371726	NR	NR	none	NR	NR	none
4172	22	chr22:42523610	CYP2D6	T	C	7/9	-	1127	1012	338	V/M	Gtg/Atg	rs59421388,CM016155	NR	NR	none	NR	NR	none
4173	22	chr22:42523788	CYP2D6	A	C	-	6/8	-	-	-	-	-	rs187334823	NR	NR	none	NR	NR	none
4174	22	chr22:42523943	CYP2D6	G	A	6/9	-	1001	886	296	C/R	Tgc/Cgc	rs16947,CM930187	NR	NR	none	NR	NR	none
4175	22	chr22:42524218	CYP2D6	T	G	5/9	-	916	801	267	P	ccC/ccA	rs28371718	NR	NR	none	NR	NR	none
4176	22	chr22:42524893	CYP2D6	T	C	4/9	-	674	559	187	A/T	Gcc/Acc	-	NR	NR	none	NR	NR	none
4177	22	chr22:42525132	CYP2D6	C	G	3/9	-	523	408	136	V	gtC/gtG	rs1058164	NR	NR	none	NR	NR	none
4178	22	chr22:42525236	CYP2D6	C	A	-	2/8	-	-	-	-	-	rs755309061	NR	NR	none	NR	NR	none
4179	22	chr22:42525756	CYP2D6	A	G	2/9	-	451	336	112	F	ttC/ttT	rs1081003	NR	NR	none	NR	NR	none
4180	22	chr22:42525772	CYP2D6	A	G	2/9	-	435	320	107	T/I	aCc/aTc	rs28371706,CM960483	NR	NR	none	NR	NR	none
4181	22	chr22:42525791	CYP2D6	A	G	2/9	-	416	301	101	R/C	Cgc/Tgc	rs369390846	NR	NR	none	NR	NR	none
4182	22	chr22:42525798	CYP2D6	C	G	2/9	-	409	294	98	T	acC/acG	rs28371705	NR	NR	none	NR	NR	none
4183	22	chr22:42525811	CYP2D6	C	T	2/9	-	396	281	94	H/R	cAc/cGc	rs28371704,CM994690,COSM4590248,COSM4590249	NR	NEUTRAL	none	NR	Confirmed somatic variant	Confirmed somatic variant
4184	22	chr22:42525821	CYP2D6	T	G	2/9	-	386	271	91	L/M	Ctg/Atg	rs28371703,CM994689	NR	NR	none	NR	NR	none
4185	22	chr22:42526549	CYP2D6	T	C	-	1/8	-	-	-	-	-	rs1081000	NR	NR	none	NR	NR	none
4186	22	chr22:42526561	CYP2D6	TC	GG	-	1/8	-	-	-	-	-	rs796532118	NR	NR	none	NR	NR	none
4187	22	chr22:42526567	CYP2D6	A	G	-	1/8	-	-	-	-	-	TMP_ESP_22_42526567_42526567	NR	NR	none	NR	NR	none
4188	22	chr22:42526571	CYP2D6	G	C	-	1/8	-	-	-	-	-	TMP_ESP_22_42526571_42526571	NR	NR	none	NR	NR	none
4189	22	chr22:42526573	CYP2D6	G	T	-	1/8	-	-	-	-	-	rs1080996	NR	NR	none	NR	NR	none
4190	22	chr22:42526580	CYP2D6	C	G	-	1/8	-	-	-	-	-	rs1080995	NR	NR	none	NR	NR	none
4191	22	chr22:42526694	CYP2D6	A	G	1/9	-	215	100	34	P/S	Cca/Tca	rs1065852,CM900081	NR	NR	none	NR	NR	none
4192	22	chr22:42526763	CYP2D6	T	C	1/9	-	146	31	11	V/M	Gtg/Atg	rs769258,CM033368	NR	NR	none	NR	NR	none
1465	6	chr6:33287183	DAXX	C	T	6/8	-	2119	1914	638	Q	caA/caG	rs2051625,COSM5020839	NR	NEUTRAL	none	NR	Confirmed somatic variant	Confirmed somatic variant
1466	6	chr6:33288271	DAXX	G	A	4/8	-	1342	1137	379	Y	taT/taC	rs1059231,COSM5019618	NR	NEUTRAL	none	NR	Confirmed somatic variant	Confirmed somatic variant
1467	6	chr6:33289108	DAXX	A	G	3/8	-	649	444	148	A	gcC/gcT	rs200831474,COSM4586655,COSM5548690	NR	NEUTRAL	none	NR	Variant of unknown origin	none
1468	6	chr6:33289731	DAXX	A	G	2/8	-	177	-	-	-	-	rs80057060	NR	NR	none	NR	NR	none
3827	18	chr18:49867224	DCC	C	T	1/29	-	683	67	23	F/L	Ttc/Ctc	rs9951523	NR	NR	none	NR	NR	none
3828	18	chr18:50278686	DCC	A	G	2/29	-	970	354	118	E	gaG/gaA	rs13381333	NR	NR	none	NR	NR	none
3829	18	chr18:50432602	DCC	G	C	3/29	-	1217	601	201	R/G	Cga/Gga	rs2229080,CM973390	NR	NR	none	NR	NR	none
3830	18	chr18:50451642	DCC	G	T	5/29	-	1503	887	296	L/R	cTt/cGt	-	NR	NR	none	NR	NR	none
3831	18	chr18:50451662	DCC	C	G	5/29	-	1523	907	303	D/H	Gat/Cat	-	NR	NR	none	NR	NR	none
3832	18	chr18:50589751	DCC	T	C	6/29	-	1678	1062	354	V	gtC/gtT	rs141716650	NR	NR	none	NR	NR	none
3833	18	chr18:50592418	DCC	T	A	7/29	-	1759	1143	381	G	ggA/ggT	rs111544101	NR	NR	none	NR	NR	none
3834	18	chr18:50683691	DCC	A	G	-	7/28	-	-	-	-	-	rs2276147	NR	NR	none	NR	NR	none
3835	18	chr18:50683873	DCC	A	G	8/29	-	2025	1409	470	G/D	gGt/gAt	rs141813053,CM145920	NR	NR	none	NR	NR	none
3836	18	chr18:50734032	DCC	A	G	-	10/28	-	-	-	-	-	rs8096698	NR	NR	none	NR	NR	none
3837	18	chr18:50734266	DCC	G	A	-	11/28	-	-	-	-	-	rs115951965	NR	NR	none	NR	NR	none
3838	18	chr18:50831933	DCC	T	C	-	12/28	-	-	-	-	-	rs1431195	NR	NR	none	NR	NR	none
3839	18	chr18:50832036	DCC	A	G	13/29	-	2616	2000	667	R/H	cGc/cAc	rs200099519,CM145921,COSM4072541,COSM4072542	NR	PATHOGENIC	PATHOGENIC	NR	Confirmed somatic variant	Confirmed somatic variant
3840	18	chr18:50917982	DCC	T	C	-	16/28	-	-	-	-	-	rs12604262	NR	NR	none	NR	NR	none
3841	18	chr18:50936780	DCC	A	G	-	19/28	-	-	-	-	-	rs10853631	NR	NR	none	NR	NR	none
3842	18	chr18:50936994	DCC	C	T	20/29	-	3724	3108	1036	P	ccT/ccC	rs2229082	NR	NR	none	NR	NR	none
3843	18	chr18:50937026	DCC	G	A	-	20/28	-	-	-	-	-	rs11873515	NR	NR	none	NR	NR	none
3844	18	chr18:50942526	DCC	T	G	21/29	-	3779	3163	1055	G/C	Ggt/Tgt	-	NR	NR	none	NR	NR	none
3845	18	chr18:50976845	DCC	C	A	-	22/28	-	-	-	-	-	-	NR	NR	none	NR	NR	none
2749	11	chr11:47237821	DDB2	T	C	-	1/9	-	-	-	-	-	rs186870004	NR	NR	none	NR	NR	none
2750	11	chr11:47238522	DDB2	T	C	3/10	-	573	378	126	T	acT/acC	rs326212	NR	NR	none	NR	NR	none
2751	11	chr11:47259417	DDB2	C	T	8/10	-	1248	1053	351	I	atT/atC	rs61741581	NR	NR	none	NR	NR	none
2752	11	chr11:47259668	DDB2	C	T	-	8/9	-	-	-	-	-	rs326222	NR	NR	none	NR	NR	none
2753	11	chr11:47260319	DDB2	G	A	-	9/9	-	-	-	-	-	rs901746	NR	NR	none	NR	NR	none
2958	12	chr12:57910569	DDIT3	T	G	4/4	-	870	-	-	-	-	rs368301051	NR	NR	none	NR	NR	none
2959	12	chr12:57911160	DDIT3	A	G	3/4	-	367	99	33	F	ttC/ttT	rs697221	NR	NR	none	NR	NR	none
339	1	chr1:162722881	DDR2	T	C	-	4/18	-	-	-	-	-	rs76156815	NR	NR	none	NR	NR	none
340	1	chr1:162737116	DDR2	G	C	12/19	-	1698	1260	420	L	ctC/ctG	rs2298258,COSM3997043	NR	NR	none	NR	NR	none
341	1	chr1:162737153	DDR2	T	A	-	12/18	-	-	-	-	-	-	NR	NR	none	NR	NR	none
342	1	chr1:162740264	DDR2	A	G	13/19	-	1904	1466	489	R/Q	cGa/cAa	rs756149068,COSM6952102,COSM6952103,COSM6952104,COSM7126313,COSM7126314,COSM7126315	PATHOGENIC	PATHOGENIC	PATHOGENIC	Confirmed somatic variant	Confirmed somatic variant	Confirmed somatic variant
343	1	chr1:162740326	DDR2	CG	GT	-	13/18	-	-	-	-	-	-	NR	NR	none	NR	NR	none
344	1	chr1:162740327	DDR2	C	T	-	13/18	-	-	-	-	-	rs1780003	NR	NR	none	NR	NR	none
345	1	chr1:162741794	DDR2	T	C	-	13/18	-	-	-	-	-	rs3738807	NR	NR	none	NR	NR	none
346	1	chr1:162743242	DDR2	G	A	-	14/18	-	-	-	-	-	rs200983597	NR	NR	none	NR	NR	none
347	1	chr1:162743362	DDR2	A	G	15/19	-	2270	1832	611	R/Q	cGa/cAa	rs372362070,COSM6935160	PATHOGENIC	PATHOGENIC	PATHOGENIC	Confirmed somatic variant	Confirmed somatic variant	Confirmed somatic variant
348	1	chr1:162743418	DDR2	T	G	-	15/18	-	-	-	-	-	rs1355287	NR	NR	none	NR	NR	none
349	1	chr1:162748385	DDR2	T	G	18/19	-	2737	2299	767	A/S	Gca/Tca	-	NR	NR	none	NR	NR	none
350	1	chr1:162749949	DDR2	T	G	19/19	-	2919	2481	827	L	ctG/ctT	rs35077871	NR	NR	none	NR	NR	none
1425	6	chr6:18236654	DEK	T	C	-	9/10	-	-	-	-	-	rs75250173	NR	NR	none	NR	NR	none
1426	6	chr6:18236780	DEK	C	T	9/11	-	1398	950	317	K/R	aAg/aGg	rs200180483,COSM2856288	PATHOGENIC	PATHOGENIC	PATHOGENIC	Variant of unknown origin	Variant of unknown origin	none
1427	6	chr6:18237661	DEK	T	C	8/11	-	1297	849	283	K	aaG/aaA	rs1013062	NR	NR	none	NR	NR	none
1428	6	chr6:18250083	DEK	G	T	-	6/10	-	-	-	-	-	rs561297111	NR	NR	none	NR	NR	none
1429	6	chr6:18256625	DEK	G	A	5/11	-	867	419	140	V/A	gTc/gCc	rs17336208,COSM7294976	NEUTRAL	NEUTRAL	none	Confirmed somatic variant	Confirmed somatic variant	Confirmed somatic variant
1430	6	chr6:18258516	DEK	A	G	-	3/10	-	-	-	-	-	rs172520	NR	NR	none	NR	NR	none
1431	6	chr6:18264210	DEK	A	G	2/11	-	457	9	3	A	gcC/gcT	rs11544757	NR	NR	none	NR	NR	none
3150	14	chr14:95556747	DICER1	A	T	29/29	-	6149	-	-	-	-	rs13078	NR	NR	none	NR	NR	none
3151	14	chr14:95566104	DICER1	A	C	-	24/28	-	-	-	-	-	rs398043696	NR	NR	none	NR	NR	none
3152	14	chr14:95566108	DICER1	A	C	-	24/28	-	-	-	-	-	rs1778057,COSM5019203,COSM5427246	NR	NEUTRAL	none	NR	Confirmed somatic variant	Confirmed somatic variant
3153	14	chr14:95569893	DICER1	A	G	23/29	-	4132	3840	1280	S	agC/agT	-	NR	NR	none	NR	NR	none
3154	14	chr14:95570259	DICER1	A	G	23/29	-	3766	3474	1158	S	agC/agT	rs368984998	NR	NR	none	NR	NR	none
3155	14	chr14:95571394	DICER1	T	C	-	22/28	-	-	-	-	-	rs201906274	NR	NR	none	NR	NR	none
3156	14	chr14:95574314	DICER1	T	C	18/29	-	2845	2553	851	Q	caG/caA	rs373715574	NR	NR	none	NR	NR	none
3157	14	chr14:95574727	DICER1	T	C	17/29	-	2662	2370	790	R	cgG/cgA	rs112712209	NR	NR	none	NR	NR	none
3158	14	chr14:95574747	DICER1	A	C	17/29	-	2642	2350	784	E/*	Gaa/Taa	rs1131691210	NR	NR	none	NR	NR	none
3159	14	chr14:95582024	DICER1	T	C	13/29	-	2179	1887	629	T	acG/acA	rs141651702	NR	NR	none	NR	NR	none
3160	14	chr14:95584095	DICER1	C	A	-	10/28	-	-	-	-	-	rs192490028	NR	NR	none	NR	NR	none
3161	14	chr14:95590698	DICER1	A	C	10/29	-	1503	1211	404	R/I	aGa/aTa	COSM959277	NR	PATHOGENIC	PATHOGENIC	NR	Variant of unknown origin	none
3162	14	chr14:95595941	DICER1	T	C	8/29	-	894	602	201	R/H	cGc/cAc	COSM1238673	PATHOGENIC	PATHOGENIC	PATHOGENIC	Confirmed somatic variant	Reported in another cancer sample as somatic	Confirmed somatic variant			Oesophagus
499	2	chr2:25457148	DNMT3A	G	T	23/23	-	3077	2739	913	*/Y	taA/taC	-	NR	NR	none	NR	NR	none
500	2	chr2:25458546	DNMT3A	T	C	-	22/22	-	-	-	-	-	rs2304429	NR	NR	none	NR	NR	none
501	2	chr2:25463483	DNMT3A	A	G	-	18/22	-	-	-	-	-	rs2289195	NR	NR	none	NR	NR	none
502	2	chr2:25467549	DNMT3A	T	C	-	13/22	-	-	-	-	-	rs199842466	NR	NR	none	NR	NR	none
503	2	chr2:25469502	DNMT3A	T	C	10/23	-	1604	1266	422	L	ctG/ctA	rs2276598,COSM4001621	NR	NR	none	NR	NR	none
504	2	chr2:25471170	DNMT3A	-	C	-	6/22	-	-	-	-	-	rs3216707	NR	NR	none	NR	NR	none
505	2	chr2:25472552	DNMT3A	A	G	-	6/22	-	-	-	-	-	rs151168784	NR	NR	none	NR	NR	none
506	2	chr2:25523013	DNMT3A	A	G	3/23	-	510	172	58	P/S	Ccc/Tcc	-	NR	NR	none	NR	NR	none
118	1	chr1:97547831	DPYD	A	G	-	22/22	-	-	-	-	-	rs290854	NR	NR	none	NR	NR	none
119	1	chr1:97564040	DPYD	G	T	-	21/22	-	-	-	-	-	-	NR	NR	none	NR	NR	none
120	1	chr1:97770920	DPYD	T	C	18/23	-	2295	2194	732	V/I	Gtt/Att	rs1801160	NR	NR	none	NR	NR	none
121	1	chr1:97771947	DPYD	A	C	-	16/22	-	-	-	-	-	rs7556439	NR	NR	none	NR	NR	none
122	1	chr1:97915624	DPYD	G	A	14/23	-	1997	1896	632	F	ttT/ttC	rs17376848	NR	NR	none	NR	NR	none
123	1	chr1:97981395	DPYD	C	T	13/23	-	1728	1627	543	I/V	Ata/Gta	rs1801159,CM033371	NR	NR	none	NR	NR	none
124	1	chr1:97981421	DPYD	T	C	13/23	-	1702	1601	534	S/N	aGt/aAt	rs1801158,CM033370	NR	NR	none	NR	NR	none
125	1	chr1:97981508	DPYD	T	C	-	12/22	-	-	-	-	-	rs55699321	NR	NR	none	NR	NR	none
126	1	chr1:98039419	DPYD	T	C	11/23	-	1337	1236	412	E	gaG/gaA	rs56038477	NR	NR	none	NR	NR	none
127	1	chr1:98058980	DPYD	A	G	-	9/22	-	-	-	-	-	rs754234706	NR	NR	none	NR	NR	none
128	1	chr1:98144767	DPYD	T	A	-	7/22	-	-	-	-	-	-	NR	NR	none	NR	NR	none
129	1	chr1:98157362	DPYD	A	G	-	6/22	-	-	-	-	-	rs74774246	NR	NR	none	NR	NR	none
130	1	chr1:98165091	DPYD	C	T	6/23	-	597	496	166	M/V	Atg/Gtg	rs2297595,CM003589	NR	NR	none	NR	NR	none
131	1	chr1:98186417	DPYD	A	C	-	5/22	-	-	-	-	-	rs187184975	NR	NR	none	NR	NR	none
132	1	chr1:98187048	DPYD	T	C	-	5/22	-	-	-	-	-	rs56276561	NR	NR	none	NR	NR	none
133	1	chr1:98206046	DPYD	C	A	-	3/22	-	-	-	-	-	-	NR	NR	none	NR	NR	none
134	1	chr1:98348885	DPYD	A	G	2/23	-	186	85	29	R/C	Cgt/Tgt	rs1801265,CM970421	NR	NR	none	NR	NR	none
135	1	chr1:98386487	DPYD	A	C	1/23	-	93	-	-	-	-	-	NR	NR	none	NR	NR	none
1543	6	chr6:56327807	DST	A	G	-	82/83	-	-	-	-	-	rs758173739	NR	NR	none	NR	NR	none
1544	6	chr6:56327849	DST	T	C	82/84	-	15332	15124	5042	A/T	Gca/Aca	rs11758339	NR	NR	none	NR	NR	none
1545	6	chr6:56327856	DST	T	C	82/84	-	15325	15117	5039	V	gtG/gtA	rs144012429	NR	NR	none	NR	NR	none
1546	6	chr6:56328426	DST	G	A	81/84	-	15163	14955	4985	T	acT/acC	rs200781365	NR	NR	none	NR	NR	none
1547	6	chr6:56333747	DST	G	A	-	79/83	-	-	-	-	-	rs41271852	NR	NR	none	NR	NR	none
1548	6	chr6:56341107	DST	A	T	73/84	-	14043	13835	4612	Q/L	cAg/cTg	-	NR	NR	none	NR	NR	none
1549	6	chr6:56347533	DST	C	A	70/84	-	13689	13481	4494	V/G	gTg/gGg	-	NR	NR	none	NR	NR	none
1550	6	chr6:56350158	DST	C	A	69/84	-	13498	13290	4430	P	ccT/ccG	-	NR	NR	none	NR	NR	none
1551	6	chr6:56350339	DST	A	T	-	68/83	-	-	-	-	-	rs2273974	NR	NR	none	NR	NR	none
1552	6	chr6:56357241	DST	-	A	-	65/83	-	-	-	-	-	rs756520184,COSM6649750,COSM6649751	null	null	none	Confirmed somatic variant	Confirmed somatic variant	Confirmed somatic variant
1553	6	chr6:56359034	DST	A	C	-	63/83	-	-	-	-	-	rs11759493	NR	NR	none	NR	NR	none
1554	6	chr6:56366285	DST	G	T	-	60/83	-	-	-	-	-	rs77434452	NR	NR	none	NR	NR	none
1555	6	chr6:56371189	DST	A	G	-	58/83	-	-	-	-	-	rs116220185	NR	NR	none	NR	NR	none
1556	6	chr6:56373536	DST	T	C	56/84	-	11369	11161	3721	D/N	Gac/Aac	rs41271862	NR	NR	none	NR	NR	none
1557	6	chr6:56374754	DST	A	C	-	54/83	-	-	-	-	-	rs9296849	NR	NR	none	NR	NR	none
1558	6	chr6:56391183	DST	G	A	50/84	-	10444	10236	3412	D	gaT/gaC	rs148368712	NR	NR	none	NR	NR	none
1559	6	chr6:56391375	DST	C	T	-	49/83	-	-	-	-	-	rs116504133	NR	NR	none	NR	NR	none
1560	6	chr6:56394173	DST	C	T	-	47/83	-	-	-	-	-	rs9357922	NR	NR	none	NR	NR	none
1561	6	chr6:56394248	DST	A	G	47/84	-	9932	9724	3242	R/W	Cgg/Tgg	rs766911461	NR	NR	none	NR	NR	none
1562	6	chr6:56417148	DST	G	T	42/84	-	8781	8573	2858	Q/P	cAa/cCa	-	NR	NR	none	NR	NR	none
1563	6	chr6:56417150	DST	T	G	42/84	-	8779	8571	2857	A	gcC/gcA	COSM4153562,COSM4153563	NR	NR	none	NR	NR	none
1564	6	chr6:56417192	DST	T	C	42/84	-	8737	8529	2843	L	ttG/ttA	rs12662511	NR	NR	none	NR	NR	none
1565	6	chr6:56417282	DST	T	C	42/84	-	8647	8439	2813	M/I	atG/atA	rs4715630	NR	NR	none	NR	NR	none
1566	6	chr6:56417448	DST	C	A	42/84	-	8481	8273	2758	L/R	cTt/cGt	-	NR	NR	none	NR	NR	none
1567	6	chr6:56417545	DST	C	T	42/84	-	8384	8176	2726	T/A	Acc/Gcc	rs4715631	NR	NR	none	NR	NR	none
1568	6	chr6:56417692	DST	T	C	42/84	-	8237	8029	2677	D/N	Gat/Aat	rs200661658	NR	NR	none	NR	NR	none
1569	6	chr6:56418020	DST	T	C	42/84	-	7909	7701	2567	E	gaG/gaA	rs200941177	NR	NR	none	NR	NR	none
1570	6	chr6:56418399	DST	C	T	42/84	-	7530	7322	2441	Q/R	cAa/cGa	rs143438011	NR	NR	none	NR	NR	none
1571	6	chr6:56420538	DST	T	C	41/84	-	7080	6872	2291	R/H	cGt/cAt	rs11756977	NR	NR	none	NR	NR	none
1572	6	chr6:56425284	DST	G	A	-	38/83	-	-	-	-	-	rs2067543	NR	NR	none	NR	NR	none
1573	6	chr6:56426265	DST	T	C	38/84	-	6490	6282	2094	A	gcG/gcA	rs78882406	NR	NR	none	NR	NR	none
1574	6	chr6:56426931	DST	T	C	-	37/83	-	-	-	-	-	rs9367689	NR	NR	none	NR	NR	none
1575	6	chr6:56437902	DST	T	C	-	32/83	-	-	-	-	-	rs2144405	NR	NR	none	NR	NR	none
1576	6	chr6:56458836	DST	C	A	29/84	-	4690	4482	1494	T	acT/acG	rs16888032	NR	NR	none	NR	NR	none
1577	6	chr6:56463410	DST	C	T	27/84	-	4131	3923	1308	Q/R	cAg/cGg	rs4712138,COSM4004092,COSM4004093	NR	NEUTRAL	none	NR	Confirmed somatic variant	Confirmed somatic variant
1578	6	chr6:56476262	DST	C	T	-	24/83	-	-	-	-	-	rs7747060	NR	NR	none	NR	NR	none
1579	6	chr6:56479179	DST	G	C	23/84	-	3630	3422	1141	G/A	gGa/gCa	rs751524469	NR	NR	none	NR	NR	none
1580	6	chr6:56481060	DST	C	T	-	22/83	-	-	-	-	-	rs115473902	NR	NR	none	NR	NR	none
1581	6	chr6:56482801	DST	G	C	-	22/83	-	-	-	-	-	rs6459166	NR	NR	none	NR	NR	none
1582	6	chr6:56483347	DST	C	G	-	22/83	-	-	-	-	-	rs79943354	NR	NR	none	NR	NR	none
1583	6	chr6:56483777	DST	G	A	-	22/83	-	-	-	-	-	rs2230864	NR	NR	none	NR	NR	none
1584	6	chr6:56483852	DST	G	T	-	22/83	-	-	-	-	-	rs2230863	NR	NR	none	NR	NR	none
1585	6	chr6:56483870	DST	T	C	-	22/83	-	-	-	-	-	rs370912424,COSM1329599,COSM1329600	NR	NEUTRAL	none	NR	Variant of unknown origin	none
1586	6	chr6:56484758	DST	T	C	-	22/83	-	-	-	-	-	rs2230862	NR	NR	none	NR	NR	none
1587	6	chr6:56484782	DST	T	C	-	22/83	-	-	-	-	-	rs377356403	NR	NR	none	NR	NR	none
1588	6	chr6:56485091	DST	-	AAA	-	22/83	-	-	-	-	-	-	NR	NR	none	NR	NR	none
1589	6	chr6:56485241	DST	A	G	-	22/83	-	-	-	-	-	rs368674616	NR	NR	none	NR	NR	none
1590	6	chr6:56485266	DST	C	G	-	22/83	-	-	-	-	-	-	NR	NR	none	NR	NR	none
1591	6	chr6:56485517	DST	T	C	-	22/83	-	-	-	-	-	rs146628688	NR	NR	none	NR	NR	none
1592	6	chr6:56489429	DST	T	G	-	21/83	-	-	-	-	-	rs115890942	NR	NR	none	NR	NR	none
1593	6	chr6:56489467	DST	-	TTACTC	-	21/83	-	-	-	-	-	-	NR	NR	none	NR	NR	none
1594	6	chr6:56492121	DST	T	G	-	19/83	-	-	-	-	-	rs370498103	NR	NR	none	NR	NR	none
1595	6	chr6:56494071	DST	G	A	18/84	-	3049	2841	947	N	aaT/aaC	rs112640831	NR	NR	none	NR	NR	none
1596	6	chr6:56505063	DST	G	A	4/84	-	965	757	253	L	Ttg/Ctg	rs2144407	NR	NR	none	NR	NR	none
1597	6	chr6:56507135	DST	C	T	-	2/83	-	-	-	-	-	rs1024195	NR	NR	none	NR	NR	none
1598	6	chr6:56507172	DST	-	C	-	2/83	-	-	-	-	-	rs140666858	NR	NR	none	NR	NR	none
1599	6	chr6:56507489	DST	G	A	1/84	-	306	98	33	L/S	tTg/tCg	rs1024196	NR	NR	none	NR	NR	none
1600	6	chr6:56507568	DST	C	T	1/84	-	227	19	7	S/G	Agt/Ggt	rs368676961	NR	NR	none	NR	NR	none
1888	7	chr7:55214348	EGFR	T	C	4/28	-	651	474	158	N	aaC/aaT	rs2072454,COSM42978	PATHOGENIC	PATHOGENIC	PATHOGENIC	Confirmed somatic variant	Confirmed somatic variant	Confirmed somatic variant
1889	7	chr7:55214443	EGFR	A	G	-	4/27	-	-	-	-	-	rs7801956,COSM5019933	NR	NR	none	NR	NR	none
1890	7	chr7:55220270	EGFR	T	C	6/28	-	837	660	220	S	tcC/tcT	rs45621033	NR	NR	none	NR	NR	none
1891	7	chr7:55228053	EGFR	T	A	-	12/27	-	-	-	-	-	rs1558544	NR	NR	none	NR	NR	none
1892	7	chr7:55229255	EGFR	A	G	13/28	-	1739	1562	521	R/K	aGg/aAg	rs2227983,CM942312,COSM3721608	NEUTRAL	NEUTRAL	none	Confirmed somatic variant	Confirmed somatic variant	Confirmed somatic variant
1893	7	chr7:55233080	EGFR	T	C	15/28	-	2007	1830	610	Y	taC/taT	rs115350205	NR	NR	none	NR	NR	none
1894	7	chr7:55233089	EGFR	T	C	15/28	-	2016	1839	613	A	gcC/gcT	rs17290169,COSM5019977	NR	NR	none	NR	NR	none
1895	7	chr7:55238087	EGFR	T	C	-	15/27	-	-	-	-	-	rs10258429	NR	NR	none	NR	NR	none
1896	7	chr7:55238874	EGFR	A	T	16/28	-	2064	1887	629	T	acT/acA	rs2227984,COSM3762772	NR	NR	none	NR	NR	none
1897	7	chr7:55240882	EGFR	A	G	-	17/27	-	-	-	-	-	rs17290301	NR	NR	none	NR	NR	none
1898	7	chr7:55241755	EGFR	A	G	-	18/27	-	-	-	-	-	rs17337107	NR	NR	none	NR	NR	none
1899	7	chr7:55249063	EGFR	A	G	20/28	-	2538	2361	787	Q	caG/caA	rs1050171,CM067987,COSM1451600	NR	PATHOGENIC	PATHOGENIC	NR	Confirmed somatic variant	Confirmed somatic variant
1900	7	chr7:55259450	EGFR	T	C	21/28	-	2685	2508	836	R	cgC/cgT	rs2229066,COSM85893	NR	NEUTRAL	none	NR	Reported in another cancer sample as somatic	none
1901	7	chr7:55266417	EGFR	C	T	23/28	-	2886	2709	903	T	acT/acC	rs1140475,COSM6503371	NR	NEUTRAL	none	NR	Confirmed somatic variant	Confirmed somatic variant
1902	7	chr7:55268916	EGFR	T	C	25/28	-	3159	2982	994	D	gaC/gaT	rs2293347,COSM3762773	PATHOGENIC	PATHOGENIC	PATHOGENIC	Confirmed somatic variant	Confirmed somatic variant	Confirmed somatic variant
1903	7	chr7:55270249	EGFR	T	C	27/28	-	3379	3202	1068	R/*	Cga/Tga	rs749783044,COSM3266657	NR	PATHOGENIC	PATHOGENIC	NR	Confirmed somatic variant	Confirmed somatic variant
1904	7	chr7:55270257	EGFR	T	C	27/28	-	3387	3210	1070	S	agC/agT	rs41494749,COSM1559818	NR	NR	none	NR	NR	none
527	2	chr2:42396722	EML4	G	A	1/23	-	233	-	-	-	-	rs7233	NR	NR	none	NR	NR	none
528	2	chr2:42507962	EML4	-	ACTTA	-	6/22	-	-	-	-	-	rs569899355	NR	NR	none	NR	NR	none
529	2	chr2:42510014	EML4	T	C	8/23	-	1105	843	281	T	acC/acT	rs143102568	NR	NR	none	NR	NR	none
530	2	chr2:42510018	EML4	A	G	8/23	-	1109	847	283	K/E	Aaa/Gaa	rs6736913	NR	NR	none	NR	NR	none
531	2	chr2:42515388	EML4	G	A	11/23	-	1406	1144	382	I/V	Att/Gtt	rs10202624	NR	NR	none	NR	NR	none
532	2	chr2:42515437	EML4	G	A	11/23	-	1455	1193	398	K/R	aAg/aGg	rs28651764	NR	NR	none	NR	NR	none
533	2	chr2:42515501	EML4	T	C	-	11/22	-	-	-	-	-	rs10179237	NR	NR	none	NR	NR	none
534	2	chr2:42531610	EML4	G	T	-	16/22	-	-	-	-	-	rs148415631	NR	NR	none	NR	NR	none
535	2	chr2:42556022	EML4	T	A	-	21/22	-	-	-	-	-	rs2286700	NR	NR	none	NR	NR	none
4148	22	chr22:41513420	EP300	T	C	2/31	-	1543	324	108	A	gcC/gcT	rs138876937	NR	NR	none	NR	NR	none
4149	22	chr22:41513682	EP300	G	A	2/31	-	1805	586	196	I/V	Att/Gtt	rs148693910	NR	NR	none	NR	NR	none
4150	22	chr22:41513774	EP300	G	C	2/31	-	1897	678	226	G	ggC/ggG	rs147244947,COSM5021106	NR	PATHOGENIC	PATHOGENIC	NR	Confirmed somatic variant	Confirmed somatic variant
4151	22	chr22:41523536	EP300	G	C	4/31	-	2171	952	318	P/A	Cca/Gca	rs762647727,COSM4824823,COSM6924248	NR	NR	none	NR	NR	none
4152	22	chr22:41523770	EP300	A	G	-	4/30	-	-	-	-	-	rs3818120	NR	NR	none	NR	NR	none
4153	22	chr22:41542838	EP300	-	T	-	11/30	-	-	-	-	-	-	NR	NR	none	NR	NR	none
4154	22	chr22:41543983	EP300	G	C	-	12/30	-	-	-	-	-	rs17002314	NR	NR	none	NR	NR	none
4155	22	chr22:41547910	EP300	A	C	15/31	-	4110	2891	964	S/Y	tCt/tAt	rs1342949087,COSM6008648	NR	PATHOGENIC	PATHOGENIC	NR	Confirmed somatic variant	Confirmed somatic variant
4156	22	chr22:41548008	EP300	G	A	15/31	-	4208	2989	997	I/V	Att/Gtt	rs20551,COSM5009621	PATHOGENIC	PATHOGENIC	PATHOGENIC	Confirmed somatic variant	Confirmed somatic variant	Confirmed somatic variant
4157	22	chr22:41550944	EP300	A	T	-	16/30	-	-	-	-	-	-	NR	NR	none	NR	NR	none
4158	22	chr22:41551039	EP300	A	T	17/31	-	4402	3183	1061	T	acT/acA	rs20552,COSM4767796	NEUTRAL	NEUTRAL	none	Confirmed somatic variant	Confirmed somatic variant	Confirmed somatic variant
4159	22	chr22:41564696	EP300	T	G	-	24/30	-	-	-	-	-	rs750721066	NR	NR	none	NR	NR	none
4160	22	chr22:41564708	EP300	A	C	-	24/30	-	-	-	-	-	rs2294976	NR	NR	none	NR	NR	none
4161	22	chr22:41568480	EP300	C	T	-	27/30	-	-	-	-	-	rs2076577	NR	NR	none	NR	NR	none
4162	22	chr22:41569609	EP300	T	C	-	28/30	-	-	-	-	-	rs2076578	NR	NR	none	NR	NR	none
4163	22	chr22:41572541	EP300	T	C	-	30/30	-	-	-	-	-	rs73176628	NR	NR	none	NR	NR	none
4164	22	chr22:41572566	EP300	G	C	-	30/30	-	-	-	-	-	rs77540024	NR	NR	none	NR	NR	none
4165	22	chr22:41572568	EP300	T	C	-	30/30	-	-	-	-	-	rs376408346	NR	NR	none	NR	NR	none
4166	22	chr22:41572577	EP300	G	T	-	30/30	-	-	-	-	-	rs780087937	NR	NR	none	NR	NR	none
4167	22	chr22:41573603	EP300	T	C	31/31	-	7107	5888	1963	A/V	gCc/gTc	rs754423861	NR	NR	none	NR	NR	none
4168	22	chr22:41574892	EP300	G	C	31/31	-	8396	7177	2393	L/V	Ctg/Gtg	rs377508897,COSM5020743	NR	PATHOGENIC	PATHOGENIC	NR	Reported in another cancer sample as somatic	none
2990	12	chr12:132445086	EP400	C	T	-	1/52	-	-	-	-	-	rs7971054	NR	NR	none	NR	NR	none
2991	12	chr12:132464224	EP400	T	C	-	2/52	-	-	-	-	-	rs202156991	NR	NR	none	NR	NR	none
2992	12	chr12:132466141	EP400	A	G	4/53	-	1652	1543	515	G/R	Gga/Aga	-	NR	NR	none	NR	NR	none
2993	12	chr12:132474592	EP400	A	G	8/53	-	2602	2493	831	R	agG/agA	rs781511179	NR	NR	none	NR	NR	none
2994	12	chr12:132479396	EP400	G	C	-	11/52	-	-	-	-	-	rs139055745	NR	NR	none	NR	NR	none
2995	12	chr12:132490689	EP400	T	C	14/53	-	3077	2968	990	R/C	Cgc/Tgc	rs748988067	NR	NR	none	NR	NR	none
2996	12	chr12:132490800	EP400	A	G	14/53	-	3188	3079	1027	V/M	Gtg/Atg	-	NR	NR	none	NR	NR	none
2997	12	chr12:132497625	EP400	T	C	17/53	-	3622	3513	1171	A	gcC/gcT	-	NR	NR	none	NR	NR	none
2998	12	chr12:132498260	EP400	C	T	-	18/52	-	-	-	-	-	rs11831366	NR	NR	none	NR	NR	none
2999	12	chr12:132502873	EP400	T	C	21/53	-	4338	4229	1410	S/L	tCa/tTa	COSM4616445,COSM4616446	PATHOGENIC	NR	PATHOGENIC	Variant of unknown origin	NR	none
3000	12	chr12:132504710	EP400	T	C	22/53	-	4503	4394	1465	P/L	cCg/cTg	rs774823166	NR	NR	none	NR	NR	none
3001	12	chr12:132508389	EP400	G	A	24/53	-	4867	4758	1586	P	ccA/ccG	rs7133119	NR	NR	none	NR	NR	none
3002	12	chr12:132510312	EP400	A	G	25/53	-	5086	4977	1659	P	ccG/ccA	rs113935522	NR	NR	none	NR	NR	none
3003	12	chr12:132514288	EP400	G	C	28/53	-	5533	5424	1808	S	tcC/tcG	rs58319354	NR	NR	none	NR	NR	none
3004	12	chr12:132529321	EP400	C	A	-	36/52	-	-	-	-	-	-	NR	NR	none	NR	NR	none
3005	12	chr12:132529368	EP400	A	G	37/53	-	6763	6654	2218	P	ccG/ccA	rs141740536	NR	NR	none	NR	NR	none
3006	12	chr12:132530263	EP400	T	C	-	38/52	-	-	-	-	-	rs138728908	NR	NR	none	NR	NR	none
3007	12	chr12:132535065	EP400	T	G	-	40/52	-	-	-	-	-	rs918538523	NR	NR	none	NR	NR	none
3008	12	chr12:132535176	EP400	G	A	41/53	-	7479	7370	2457	K/R	aAg/aGg	-	NR	NR	none	NR	NR	none
3009	12	chr12:132539451	EP400	A	G	-	43/52	-	-	-	-	-	rs7488845	NR	NR	none	NR	NR	none
3010	12	chr12:132546659	EP400	T	C	46/53	-	7998	7889	2630	P/L	cCg/cTg	rs374438318	NR	NR	none	NR	NR	none
3011	12	chr12:132549300	EP400	G	A	48/53	-	8531	8422	2808	T/A	Aca/Gca	rs7136109	NR	NR	none	NR	NR	none
3012	12	chr12:132549307	EP400	C	A	48/53	-	8538	8429	2810	Q/P	cAa/cCa	rs150439516	NR	NR	none	NR	NR	none
3013	12	chr12:132552040	EP400	A	G	-	50/52	-	-	-	-	-	rs11246912	NR	NR	none	NR	NR	none
3014	12	chr12:132562069	EP400	C	A	53/53	-	9332	9223	3075	T/P	Acc/Ccc	-	NR	NR	none	NR	NR	none
3015	12	chr12:132562126	EP400	A	G	53/53	-	9389	9280	3094	A/T	Gcc/Acc	rs73164912	NR	NR	none	NR	NR	none
3016	12	chr12:132562275	EP400	A	G	53/53	-	9538	-	-	-	-	rs11246914	NR	NR	none	NR	NR	none
3017	12	chr12:132562291	EP400	C	T	53/53	-	9554	-	-	-	-	rs12317704	NR	NR	none	NR	NR	none
939	3	chr3:89156859	EPHA3	T	A	1/17	-	186	-	-	-	-	rs188399674	NR	NR	none	NR	NR	none
940	3	chr3:89390150	EPHA3	C	G	4/17	-	1124	899	300	G/A	gGt/gCt	rs1416437726,COSM5524377,COSM5524378,COSM6273666,COSM6273667	NR	PATHOGENIC	PATHOGENIC	NR	Confirmed somatic variant	Confirmed somatic variant
941	3	chr3:89391112	EPHA3	T	C	5/17	-	1403	1178	393	T/M	aCg/aTg	rs1211409809,COSM48326	NR	PATHOGENIC	PATHOGENIC	NR	Confirmed somatic variant	Confirmed somatic variant
942	3	chr3:89448462	EPHA3	C	T	-	6/16	-	-	-	-	-	-	NR	NR	none	NR	NR	none
943	3	chr3:89456555	EPHA3	A	T	-	8/16	-	-	-	-	-	rs3792572	NR	NR	none	NR	NR	none
944	3	chr3:89462276	EPHA3	C	T	-	9/16	-	-	-	-	-	-	NR	NR	none	NR	NR	none
945	3	chr3:89462294	EPHA3	C	A	10/17	-	1991	1766	589	K/T	aAa/aCa	-	NR	NR	none	NR	NR	none
946	3	chr3:89468375	EPHA3	G	A	11/17	-	2134	1909	637	S/G	Agt/Ggt	rs375432691	NR	NR	none	NR	NR	none
947	3	chr3:89480265	EPHA3	G	A	-	12/16	-	-	-	-	-	rs12639506	NR	NR	none	NR	NR	none
948	3	chr3:89480301	EPHA3	C	A	13/17	-	2363	2138	713	K/T	aAa/aCa	rs199630398	NR	NR	none	NR	NR	none
949	3	chr3:89498428	EPHA3	A	G	14/17	-	2625	2400	800	K	aaG/aaA	rs1398197	NR	NR	none	NR	NR	none
950	3	chr3:89521603	EPHA3	C	-	-	15/16	-	-	-	-	-	rs112297761	NR	NR	none	NR	NR	none
951	3	chr3:89521664	EPHA3	A	G	16/17	-	2966	2741	914	R/H	cGc/cAc	rs17801309,COSM4002833	NR	PATHOGENIC	PATHOGENIC	NR	Confirmed somatic variant	Confirmed somatic variant
952	3	chr3:89521693	EPHA3	C	T	16/17	-	2995	2770	924	W/R	Tgg/Cgg	rs35124509	NR	NR	none	NR	NR	none
1622	6	chr6:93964319	EPHA7	T	C	-	14/16	-	-	-	-	-	rs345736	NR	NR	none	NR	NR	none
1623	6	chr6:93965492	EPHA7	A	G	-	13/16	-	-	-	-	-	rs62414217	NR	NR	none	NR	NR	none
1624	6	chr6:93967851	EPHA7	T	C	11/17	-	2261	2076	692	P	ccG/ccA	rs345730	NR	NR	none	NR	NR	none
1625	6	chr6:93967903	EPHA7	G	T	11/17	-	2209	2024	675	Q/P	cAa/cCa	rs146203229	NR	NR	none	NR	NR	none
1626	6	chr6:93968004	EPHA7	C	T	-	10/16	-	-	-	-	-	-	NR	NR	none	NR	NR	none
1627	6	chr6:93973530	EPHA7	G	T	-	9/16	-	-	-	-	-	-	NR	NR	none	NR	NR	none
1628	6	chr6:93973569	EPHA7	G	A	-	9/16	-	-	-	-	-	rs345725	NR	NR	none	NR	NR	none
1629	6	chr6:93982124	EPHA7	G	A	6/17	-	1526	1341	447	S	agT/agC	rs345713	NR	NR	none	NR	NR	none
1630	6	chr6:94067981	EPHA7	T	C	4/17	-	1166	981	327	A	gcG/gcA	rs164544	NR	NR	none	NR	NR	none
1631	6	chr6:94068070	EPHA7	C	T	4/17	-	1077	892	298	T/A	Act/Gct	rs776903613	NR	NR	none	NR	NR	none
1632	6	chr6:94120192	EPHA7	A	G	-	3/16	-	-	-	-	-	rs474809	NR	NR	none	NR	NR	none
1633	6	chr6:94124530	EPHA7	A	C	-	1/16	-	-	-	-	-	rs540816	NR	NR	none	NR	NR	none
1634	6	chr6:94128960	EPHA7	C	T	-	1/16	-	-	-	-	-	-	NR	NR	none	NR	NR	none
958	3	chr3:134514579	EPHB1	C	T	-	1/15	-	-	-	-	-	rs9852662	NR	NR	none	NR	NR	none
959	3	chr3:134644636	EPHB1	T	G	-	2020-01-15	-	-	-	-	-	rs635721	NR	NR	none	NR	NR	none
960	3	chr3:134670524	EPHB1	T	C	3/16	-	805	435	145	S	agC/agT	rs7644369	NR	NR	none	NR	NR	none
961	3	chr3:134825398	EPHB1	A	C	4/16	-	1284	914	305	T/N	aCc/aAc	COSM6933835,COSM6933836	NR	NEUTRAL	none	NR	Confirmed somatic variant	Confirmed somatic variant
962	3	chr3:134880871	EPHB1	A	G	7/16	-	1804	1434	478	E	gaG/gaA	rs373658195,COSM6975480,COSM6975481	PATHOGENIC	NR	PATHOGENIC	Confirmed somatic variant	NR	Confirmed somatic variant
963	3	chr3:134884880	EPHB1	T	C	8/16	-	2026	1656	552	F	ttC/ttT	rs56372452	NR	NR	none	NR	NR	none
964	3	chr3:134885838	EPHB1	T	C	9/16	-	2119	1749	583	S	agC/agT	-	NR	NR	none	NR	NR	none
965	3	chr3:134898742	EPHB1	T	C	10/16	-	2170	1800	600	Y	taC/taT	rs1042787	NR	NR	none	NR	NR	none
966	3	chr3:134967368	EPHB1	A	G	-	14/15	-	-	-	-	-	rs11717042	NR	NR	none	NR	NR	none
1991	7	chr7:100401270	EPHB4	G	T	-	16/16	-	-	-	-	-	rs314348	NR	NR	none	NR	NR	none
1992	7	chr7:100403131	EPHB4	A	C	15/17	-	3139	2670	890	E/D	gaG/gaT	rs35638378	NR	NR	none	NR	NR	none
1993	7	chr7:100403157	EPHB4	T	C	15/17	-	3113	2644	882	A/T	Gcc/Acc	rs34918225	NR	NR	none	NR	NR	none
1994	7	chr7:100410597	EPHB4	A	G	12/17	-	2359	1890	630	C	tgC/tgT	rs2230585	NR	NR	none	NR	NR	none
1995	7	chr7:100410657	EPHB4	G	A	-	11/16	-	-	-	-	-	rs314358	NR	NR	none	NR	NR	none
1996	7	chr7:100411278	EPHB4	T	C	10/17	-	2221	1752	584	G	ggA/ggG	rs314359	NR	NR	none	NR	NR	none
1997	7	chr7:100411287	EPHB4	G	A	10/17	-	2212	1743	581	Y	taT/taC	rs116240595	NR	NR	none	NR	NR	none
1998	7	chr7:100411556	EPHB4	A	G	9/17	-	2145	1676	559	A/V	gCa/gTa	COSM3831342	NR	PATHOGENIC	PATHOGENIC	NR	Confirmed somatic variant	Confirmed somatic variant
1999	7	chr7:100416193	EPHB4	A	G	7/17	-	1840	1371	457	P	ccC/ccT	rs1186176030	NR	NR	none	NR	NR	none
2000	7	chr7:100416250	EPHB4	G	A	7/17	-	1783	1314	438	S	tcT/tcC	rs144173	NR	NR	none	NR	NR	none
2001	7	chr7:100417397	EPHB4	T	C	6/17	-	1548	1079	360	R/H	cGc/cAc	rs202006098,COSM1197013	NR	PATHOGENIC	PATHOGENIC	NR	Variant of unknown origin	none
2002	7	chr7:100420155	EPHB4	G	A	4/17	-	1015	546	182	G	ggT/ggC	rs56173078	NR	NR	none	NR	NR	none
2003	7	chr7:100421392	EPHB4	A	G	3/17	-	754	285	95	L	ctC/ctT	rs762471581,COSM6344946,COSM6655258	NEUTRAL	NEUTRAL	none	Confirmed somatic variant	Confirmed somatic variant	Confirmed somatic variant
2004	7	chr7:100424578	EPHB4	-	C	-	1/16	-	-	-	-	-	rs779310210,TMP_ESP_7_100424578_100424578	NR	NR	none	NR	NR	none
2005	7	chr7:100424587	EPHB4	-	G	-	2020-01-16	-	-	-	-	-	rs35907339	NR	NR	none	NR	NR	none
2066	7	chr7:142561448	EPHB6	-	G	6/20	-	947	160	54	G/X	Ggg/gg	rs773024348,COSM1724520	null	null	none	Reported in another cancer sample as somatic	Confirmed somatic variant	Confirmed somatic variant
2067	7	chr7:142561677	EPHB6	G	T	-	6/19	-	-	-	-	-	rs8177139	NR	NR	none	NR	NR	none
2068	7	chr7:142561747	EPHB6	T	C	7/20	-	976	189	63	D	gaC/gaT	rs56087487	NR	NR	none	NR	NR	none
2069	7	chr7:142562011	EPHB6	T	C	7/20	-	1240	453	151	R	cgC/cgT	rs8177141	NR	NR	none	NR	NR	none
2070	7	chr7:142562052	EPHB6	CCT	-	2020-07-20	-	1280-1281	493-494	165	P/PS	ccc/cCCTcc	rs143667567,TMP_ESP_7_142562052_142562057	NR	NR	none	NR	NR	none
2071	7	chr7:142563253	EPHB6	G	T	8/20	-	1757	970	324	S/A	Tct/Gct	rs8177146	NR	NR	none	NR	NR	none
2072	7	chr7:142564303	EPHB6	A	G	10/20	-	2314	1527	509	P	ccG/ccA	rs111424188,COSM3928870	NR	NEUTRAL	none	NR	Confirmed somatic variant	Confirmed somatic variant
2073	7	chr7:142564854	EPHB6	A	G	-	11/19	-	-	-	-	-	rs6971720	NR	NR	none	NR	NR	none
2074	7	chr7:142565385	EPHB6	A	G	12/20	-	2557	1770	590	P	ccG/ccA	rs8177153	NR	NR	none	NR	NR	none
2075	7	chr7:142565720	EPHB6	A	G	-	12/19	-	-	-	-	-	rs8177156	NR	NR	none	NR	NR	none
2076	7	chr7:142565743	EPHB6	A	G	-	12/19	-	-	-	-	-	rs8177158	NR	NR	none	NR	NR	none
2077	7	chr7:142565776	EPHB6	A	G	13/20	-	2674	1887	629	T	acG/acA	rs2229873	NR	NR	none	NR	NR	none
2078	7	chr7:142566065	EPHB6	T	C	14/20	-	2772	1985	662	A/V	gCc/gTc	rs35984674	NR	NR	none	NR	NR	none
2079	7	chr7:142566163	EPHB6	G	C	-	14/19	-	-	-	-	-	rs6944571	NR	NR	none	NR	NR	none
2080	7	chr7:142566371	EPHB6	T	C	15/20	-	2947	2160	720	A	gcC/gcT	rs6464535	NR	NR	none	NR	NR	none
2081	7	chr7:142566685	EPHB6	CT	-	-	15/19	-	-	-	-	-	rs8177164	NR	NR	none	NR	NR	none
3624	17	chr17:37856542	ERBB2	A	C	1/27	-	210	51	17	P	ccC/ccA	rs567022720	NR	NR	none	NR	NR	none
3625	17	chr17:37866741	ERBB2	T	G	-	7/26	-	-	-	-	-	rs4252619	NR	NR	none	NR	NR	none
3626	17	chr17:37868319	ERBB2	T	C	-	8/26	-	-	-	-	-	rs139636338	NR	NR	none	NR	NR	none
3627	17	chr17:37868327	ERBB2	A	G	-	8/26	-	-	-	-	-	-	NR	NR	none	NR	NR	none
3628	17	chr17:37868715	ERBB2	T	C	-	9/26	-	-	-	-	-	rs4252627	NR	NR	none	NR	NR	none
3629	17	chr17:37868741	ERBB2	C	G	-	9/26	-	-	-	-	-	-	NR	NR	none	NR	NR	none
3630	17	chr17:37879588	ERBB2	G	A	17/27	-	2122	1963	655	I/V	Atc/Gtc	rs1136201,CM004332,COSM4000121	NR	NR	none	NR	NR	none
3631	17	chr17:37879762	ERBB2	A	G	-	17/26	-	-	-	-	-	rs903506	NR	NR	none	NR	NR	none
3632	17	chr17:37880988	ERBB2	A	G	20/27	-	2476	2317	773	V/M	Gtg/Atg	rs772054394,COSM5731177,COSM5731178	PATHOGENIC	PATHOGENIC	PATHOGENIC	Confirmed somatic variant	Confirmed somatic variant	Confirmed somatic variant
3633	17	chr17:37881000	ERBB2	T	G	20/27	-	2488	2329	777	V/L	Gtg/Ttg	rs121913471,COSM14062,COSM14064,COSM436500,COSM5028283,COSM5120702,COSM6941992	PATHOGENIC	PATHOGENIC	PATHOGENIC	Confirmed somatic variant	Confirmed somatic variant	Confirmed somatic variant
3634	17	chr17:37881418	ERBB2	A	G	21/27	-	2769	2610	870	L	ctG/ctA	rs757372006	NR	NR	none	NR	NR	none
3635	17	chr17:37881600	ERBB2	A	G	22/27	-	2829	2670	890	A	gcG/gcA	rs140453509,COSM127902	NR	NEUTRAL	none	NR	Confirmed somatic variant	Confirmed somatic variant
3636	17	chr17:37883680	ERBB2	T	C	26/27	-	3451	3292	1098	L	Ctg/Ttg	-	NR	NR	none	NR	NR	none
3637	17	chr17:37884037	ERBB2	G	C	27/27	-	3667	3508	1170	P/A	Ccc/Gcc	rs1058808,CM087578,COSM5436892	PATHOGENIC	PATHOGENIC	PATHOGENIC	Confirmed somatic variant	Confirmed somatic variant	Confirmed somatic variant
2946	12	chr12:56477541	ERBB3	T	C	2/28	-	529	89	30	P/L	cCt/cTt	rs56017157	NR	NR	none	NR	NR	none
2947	12	chr12:56477694	ERBB3	T	A	-	2/27	-	-	-	-	-	rs2271194,COSM6849582	NR	NR	none	NR	NR	none
2948	12	chr12:56479046	ERBB3	T	C	-	3/27	-	-	-	-	-	-	NR	NR	none	NR	NR	none
2949	12	chr12:56479062	ERBB3	T	C	-	3/27	-	-	-	-	-	rs867431245	NR	NR	none	NR	NR	none
2950	12	chr12:56487201	ERBB3	C	T	12/28	-	1787	1347	449	I	atT/atC	rs2229046,COSM5019625	NR	NEUTRAL	none	NR	Confirmed somatic variant	Confirmed somatic variant
2951	12	chr12:56487657	ERBB3	C	G	13/28	-	2030	1590	530	V	gtG/gtC	rs55880327	NR	NR	none	NR	NR	none
2952	12	chr12:56491740	ERBB3	C	G	-	21/27	-	-	-	-	-	rs76079275	NR	NR	none	NR	NR	none
2953	12	chr12:56493822	ERBB3	C	A	-	25/27	-	-	-	-	-	rs2292238,COSM3998887	NR	NEUTRAL	none	NR	Confirmed somatic variant	Confirmed somatic variant
2954	12	chr12:56494991	ERBB3	A	G	27/28	-	3788	3348	1116	R	agG/agA	rs2271189,COSM6849614	NR	NEUTRAL	none	NR	Confirmed somatic variant	Confirmed somatic variant
2955	12	chr12:56494998	ERBB3	T	A	27/28	-	3795	3355	1119	S/C	Agc/Tgc	rs773123,COSM4989443	NR	PATHOGENIC	PATHOGENIC	NR	Confirmed somatic variant	Confirmed somatic variant
2956	12	chr12:56495016	ERBB3	T	C	27/28	-	3813	3373	1125	R/W	Cgg/Tgg	rs776728303,COSM6973420,COSM6973421	NR	PATHOGENIC	PATHOGENIC	NR	Confirmed somatic variant	Confirmed somatic variant
2957	12	chr12:56495306	ERBB3	T	C	-	27/27	-	-	-	-	-	rs812826,COSM5019712	NR	NR	none	NR	NR	none
699	2	chr2:212248254	ERBB4	T	G	28/28	-	4324	-	-	-	-	rs920954478	NR	NR	none	NR	NR	none
700	2	chr2:212248634	ERBB4	T	G	28/28	-	3944	3633	1211	T	acC/acA	-	NR	NR	none	NR	NR	none
701	2	chr2:212251864	ERBB4	C	T	27/28	-	3506	3195	1065	V	gtA/gtG	rs3748962,COSM3757923	NR	NR	none	NR	NR	none
702	2	chr2:212286934	ERBB4	T	A	-	23/27	-	-	-	-	-	rs3791709	NR	NR	none	NR	NR	none
703	2	chr2:212293212	ERBB4	C	T	-	21/27	-	-	-	-	-	rs773220688	NR	NR	none	NR	NR	none
704	2	chr2:212495163	ERBB4	T	G	-	17/27	-	-	-	-	-	-	NR	NR	none	NR	NR	none
705	2	chr2:212570063	ERBB4	T	C	10/28	-	1489	1178	393	R/Q	cGg/cAg	rs746784831,COSM6954470,COSM6954471	PATHOGENIC	PATHOGENIC	PATHOGENIC	Confirmed somatic variant	Confirmed somatic variant	Confirmed somatic variant
706	2	chr2:212652734	ERBB4	T	G	-	4/27	-	-	-	-	-	rs767886972	NR	NR	none	NR	NR	none
707	2	chr2:212812097	ERBB4	C	T	-	3/27	-	-	-	-	-	rs839541	NR	NR	none	NR	NR	none
708	2	chr2:212812179	ERBB4	A	C	3/28	-	708	397	133	E/*	Gaa/Taa	COSM6197845,COSM7250661,COSM7250662	PATHOGENIC	PATHOGENIC	PATHOGENIC	Confirmed somatic variant	Confirmed somatic variant	Confirmed somatic variant
709	2	chr2:212989451	ERBB4	T	G	-	2/27	-	-	-	-	-	-	NR	NR	none	NR	NR	none
3987	19	chr19:45916903	ERCC1	T	C	8/8	-	1067	875	292	W/*	tGg/tAg	rs116640350	NR	NR	none	NR	NR	none
3988	19	chr19:45922323	ERCC1	T	G	-	4/7	-	-	-	-	-	rs3212961	NR	NR	none	NR	NR	none
3989	19	chr19:45923617	ERCC1	G	A	3/8	-	582	390	130	Y	taT/taC	rs56148539	NR	NR	none	NR	NR	none
3990	19	chr19:45923653	ERCC1	G	A	3/8	-	546	354	118	N	aaT/aaC	rs11615	NR	NR	none	NR	NR	none
3991	19	chr19:45924362	ERCC1	C	G	-	2/7	-	-	-	-	-	rs3212948	NR	NR	none	NR	NR	none
3977	19	chr19:45854919	ERCC2	G	T	23/23	-	2329	2251	751	K/Q	Aag/Cag	rs13181,CM004814	NR	NR	none	NR	NR	none
3978	19	chr19:45855524	ERCC2	A	G	22/23	-	2211	2133	711	D	gaC/gaT	rs1052555,CM052870	NR	NR	none	NR	NR	none
3979	19	chr19:45856100	ERCC2	A	G	-	19/22	-	-	-	-	-	rs1799788	NR	NR	none	NR	NR	none
3980	19	chr19:45856468	ERCC2	C	G	-	18/22	-	-	-	-	-	rs238417	NR	NR	none	NR	NR	none
3981	19	chr19:45858976	ERCC2	T	C	16/23	-	1568	1490	497	R/H	cGt/cAt	rs757432268,COSM5097318	PATHOGENIC	NR	PATHOGENIC	Confirmed somatic variant	NR	Confirmed somatic variant
3982	19	chr19:45860637	ERCC2	A	G	-	14/22	-	-	-	-	-	rs558250151,COSM5194342	NR	PATHOGENIC	PATHOGENIC	NR	Confirmed somatic variant	Confirmed somatic variant
3983	19	chr19:45864830	ERCC2	A	G	12/23	-	1267	1189	397	L/F	Ctc/Ttc	rs1046159317	NR	NR	none	NR	NR	none
3984	19	chr19:45867259	ERCC2	T	C	10/23	-	1012	934	312	D/N	Gac/Aac	rs1799793,CM015299	NR	NR	none	NR	NR	none
3985	19	chr19:45867676	ERCC2	A	C	-	8/22	-	-	-	-	-	rs3916812	NR	NR	none	NR	NR	none
3986	19	chr19:45868309	ERCC2	G	T	6/23	-	546	468	156	R	cgA/cgC	rs238406,CM057545	NR	NR	none	NR	NR	none
592	2	chr2:128047304	ERCC3	A	G	5/15	-	713	618	206	A	gcC/gcT	rs145830873	NR	NR	none	NR	NR	none
3364	16	chr16:14013993	ERCC4	A	T	-	-	-	-	-	-	-	rs1799797	NR	NR	none	NR	NR	none
3365	16	chr16:14014240	ERCC4	A	G	-	1/10	-	-	-	-	-	rs762521	NR	NR	none	NR	NR	none
3366	16	chr16:14014278	ERCC4	A	G	-	1/10	-	-	-	-	-	rs1799798	NR	NR	none	NR	NR	none
3367	16	chr16:14015932	ERCC4	T	C	2/11	-	261	252	84	L	ctC/ctT	rs3136056	NR	NR	none	NR	NR	none
3368	16	chr16:14024644	ERCC4	G	A	5/11	-	879	870	290	I/M	atA/atG	rs1237587281	NR	NR	none	NR	NR	none
3369	16	chr16:14025942	ERCC4	G	A	-	5/10	-	-	-	-	-	rs3136121	NR	NR	none	NR	NR	none
3370	16	chr16:14026007	ERCC4	A	G	-	5/10	-	-	-	-	-	rs254942	NR	NR	none	NR	NR	none
3371	16	chr16:14029033	ERCC4	A	G	8/11	-	1253	1244	415	R/Q	cGa/cAa	rs1800067	NR	NR	none	NR	NR	none
3372	16	chr16:14038659	ERCC4	C	T	10/11	-	1993	1984	662	S/P	Tct/Cct	rs2020955	NR	NR	none	NR	NR	none
3373	16	chr16:14041958	ERCC4	C	T	11/11	-	2514	2505	835	S	tcT/tcC	rs1799801	NR	NR	none	NR	NR	none
3374	16	chr16:14042077	ERCC4	G	A	11/11	-	2633	2624	875	E/G	gAa/gGa	rs1800124	NR	NR	none	NR	NR	none
3063	13	chr13:103515085	ERCC5	C	G	8/15	-	3009	1586	529	C/S	tGt/tCt	rs2227869	NR	NR	none	NR	NR	none
3064	13	chr13:103515267	ERCC5	A	G	8/15	-	3191	1768	590	V/I	Gta/Ata	rs4150318	NR	NR	none	NR	NR	none
3065	13	chr13:103515288	ERCC5	C	G	8/15	-	3212	1789	597	V/L	Gta/Cta	rs4150319	NR	NR	none	NR	NR	none
3066	13	chr13:103518276	ERCC5	C	T	-	9/14	-	-	-	-	-	rs777842292	NR	NR	none	NR	NR	none
3067	13	chr13:103519251	ERCC5	T	C	-	11/14	-	-	-	-	-	rs4150336	NR	NR	none	NR	NR	none
3068	13	chr13:103524762	ERCC5	T	C	-	13/14	-	-	-	-	-	rs4150360	NR	NR	none	NR	NR	none
4064	21	chr21:39762883	ERG	C	T	-	11/11	-	-	-	-	-	rs2246468	NR	NR	none	NR	NR	none
4065	21	chr21:39764211	ERG	A	T	-	9/11	-	-	-	-	-	rs2836359	NR	NR	none	NR	NR	none
4066	21	chr21:39764311	ERG	T	C	9/12	-	1008	822	274	T	acG/acA	rs779857828,COSM5962704,COSM5962705	NR	NEUTRAL	none	NR	Confirmed somatic variant	Confirmed somatic variant
4067	21	chr21:39795296	ERG	A	G	-	5/11	-	-	-	-	-	rs368808654	NR	NR	none	NR	NR	none
4068	21	chr21:39817470	ERG	C	T	4/12	-	300	114	38	T	acA/acG	-	NR	NR	none	NR	NR	none
4069	21	chr21:39870310	ERG	A	G	-	3/11	-	-	-	-	-	rs2836441	NR	NR	none	NR	NR	none
1690	6	chr6:152129077	ESR1	C	T	3/10	-	400	30	10	S	tcT/tcC	rs2077647,COSM3761554	NEUTRAL	NEUTRAL	none	Confirmed somatic variant	Confirmed somatic variant	Confirmed somatic variant
1691	6	chr6:152201875	ESR1	C	T	5/10	-	1099	729	243	R	cgT/cgC	rs4986934	NR	NR	none	NR	NR	none
1692	6	chr6:152265352	ESR1	T	C	6/10	-	1175	805	269	R/C	Cgc/Tgc	rs142712646,COSM4969495	NR	NR	none	NR	NR	none
1693	6	chr6:152265370	ESR1	A	G	6/10	-	1193	823	275	E/K	Gag/Aag	rs774979604	NR	NR	none	NR	NR	none
1694	6	chr6:152265522	ESR1	C	G	2020-06-10	-	1345	975	325	P	ccG/ccC	rs1801132,CM016108,COSM4003740,COSM6942812,COSM6942813	NR	NR	none	NR	NR	none
1695	6	chr6:152415511	ESR1	T	C	-	8/9	-	-	-	-	-	rs762402090	NR	NR	none	NR	NR	none
1696	6	chr6:152420095	ESR1	A	G	10/10	-	2152	1782	594	T	acG/acA	rs2228480,CM056948,COSM3761556	NEUTRAL	NEUTRAL	none	Confirmed somatic variant	Confirmed somatic variant	Confirmed somatic variant
2859	11	chr11:128333503	ETS1	C	T	9/10	-	1228	1143	381	L	ctA/ctG	rs2230004	NR	NR	none	NR	NR	none
2860	11	chr11:128350071	ETS1	T	C	-	8/9	-	-	-	-	-	rs61909072	NR	NR	none	NR	NR	none
2861	11	chr11:128391913	ETS1	A	G	-	3/9	-	-	-	-	-	rs866933907	NR	NR	none	NR	NR	none
2862	11	chr11:128391937	ETS1	T	C	-	3/9	-	-	-	-	-	rs61907765	NR	NR	none	NR	NR	none
2863	11	chr11:128442990	ETS1	A	G	2/10	-	121	36	12	P	ccC/ccT	rs145793592,COSM3687177	NEUTRAL	NEUTRAL	none	Confirmed somatic variant	Confirmed somatic variant	Confirmed somatic variant
1874	7	chr7:13935509	ETV1	A	G	14/14	-	2084	1416	472	N	aaC/aaT	rs374879140	NR	NR	none	NR	NR	none
1875	7	chr7:13940522	ETV1	C	T	-	12/13	-	-	-	-	-	rs370696011	NR	NR	none	NR	NR	none
1876	7	chr7:13946300	ETV1	G	C	-	11/13	-	-	-	-	-	rs77269642	NR	NR	none	NR	NR	none
1877	7	chr7:13950838	ETV1	T	C	-	10/13	-	-	-	-	-	rs77694863	NR	NR	none	NR	NR	none
1878	7	chr7:13950941	ETV1	T	G	-	9/13	-	-	-	-	-	-	NR	NR	none	NR	NR	none
1879	7	chr7:13978809	ETV1	C	T	7/14	-	966	298	100	S/G	Agc/Ggc	rs9639168	NR	NR	none	NR	NR	none
1880	7	chr7:14017007	ETV1	TG	CC	-	6/13	-	-	-	-	-	rs71523042	NR	NR	none	NR	NR	none
1881	7	chr7:14025690	ETV1	C	T	-	5/13	-	-	-	-	-	rs149087275	NR	NR	none	NR	NR	none
1882	7	chr7:14025766	ETV1	A	T	-	5/13	-	-	-	-	-	rs10215655	NR	NR	none	NR	NR	none
3640	17	chr17:41606033	ETV4	A	G	13/13	-	1608	1309	437	R/C	Cgt/Tgt	rs34260468	NR	NR	none	NR	NR	none
3641	17	chr17:41606098	ETV4	T	C	13/13	-	1543	1244	415	R/H	cGt/cAt	rs373515634	NR	NR	none	NR	NR	none
3642	17	chr17:41606544	ETV4	A	G	12/13	-	1488	1189	397	R/C	Cgc/Tgc	rs753554500	NR	NR	none	NR	NR	none
3643	17	chr17:41606995	ETV4	A	G	11/13	-	1304	1005	335	Y	taC/taT	rs373939840	NR	NR	none	NR	NR	none
3644	17	chr17:41610270	ETV4	T	A	8/13	-	882	583	195	F/I	Ttc/Atc	rs150119757	NR	NR	none	NR	NR	none
3645	17	chr17:41610590	ETV4	G	C	7/13	-	809	510	170	Q/H	caG/caC	-	NR	NR	none	NR	NR	none
3646	17	chr17:41622740	ETV4	T	G	-	2/12	-	-	-	-	-	rs2271959	NR	NR	none	NR	NR	none
2327	8	chr8:118817119	EXT1	T	G	10/11	-	2704	1897	633	L/I	Cta/Ata	CD105985,COSM369368	NR	PATHOGENIC	PATHOGENIC	NR	Variant of unknown origin	none
2328	8	chr8:118819578	EXT1	T	C	9/11	-	2568	1761	587	E	gaG/gaA	rs7837891	NR	NR	none	NR	NR	none
2329	8	chr8:118825146	EXT1	A	T	8/11	-	2494	1687	563	S/C	Agc/Tgc	-	NR	NR	none	NR	NR	none
2330	8	chr8:118832020	EXT1	A	G	6/11	-	2238	1431	477	P	ccC/ccT	rs17439693,CD087952,CD119123,COSM3164995	0	NR	none	Confirmed somatic variant	NR	Confirmed somatic variant
2331	8	chr8:118834761	EXT1	T	C	5/11	-	2167	1360	454	V/I	Gta/Ata	rs201504622,CM071717,COSM7320546	NR	PATHOGENIC	PATHOGENIC	NR	Confirmed somatic variant	Confirmed somatic variant
2332	8	chr8:118847782	EXT1	A	G	3/11	-	1872	1065	355	C	tgC/tgT	rs11546829	NR	NR	none	NR	NR	none
2333	8	chr8:119122431	EXT1	A	G	1/11	-	1662	855	285	H	caC/caT	-	NR	NR	none	NR	NR	none
2737	11	chr11:44117898	EXT2	G	T	-	1/13	-	-	-	-	-	rs11037860	NR	NR	none	NR	NR	none
2738	11	chr11:44129546	EXT2	A	G	2/14	-	439	383	128	R/H	cGc/cAc	rs143703574,COSM5891435,COSM5891436,COSM5891437	NR	PATHOGENIC	PATHOGENIC	NR	Confirmed somatic variant	Confirmed somatic variant
2739	11	chr11:44129645	EXT2	A	G	2/14	-	538	482	161	R/Q	cGg/cAg	rs771039412	NR	NR	none	NR	NR	none
2740	11	chr11:44130660	EXT2	T	C	-	2/13	-	-	-	-	-	rs79851468	NR	NR	none	NR	NR	none
2741	11	chr11:44130665	EXT2	C	A	-	2/13	-	-	-	-	-	rs77233576	NR	NR	none	NR	NR	none
2742	11	chr11:44148443	EXT2	C	T	6/14	-	1172	1116	372	C	tgT/tgC	rs11828047,CM099191	NR	NR	none	NR	NR	none
2743	11	chr11:44148547	EXT2	A	C	-	6/13	-	-	-	-	-	rs369933447	NR	NR	none	NR	NR	none
2744	11	chr11:44151577	EXT2	A	T	-	6/13	-	-	-	-	-	rs11037882	NR	NR	none	NR	NR	none
2745	11	chr11:44165910	EXT2	T	C	-	7/13	-	-	-	-	-	rs192144599	NR	NR	none	NR	NR	none
2746	11	chr11:44228576	EXT2	-	A	-	10/13	-	-	-	-	-	-	NR	NR	none	NR	NR	none
2747	11	chr11:44254001	EXT2	A	G	11/14	-	1916	1860	620	T	acG/acA	rs16937864	NR	NR	none	NR	NR	none
2748	11	chr11:44257802	EXT2	C	T	-	12/13	-	-	-	-	-	rs3740878,CR072302	NR	NR	none	NR	NR	none
2082	7	chr7:148504717	EZH2	-	G	20/20	-	2399	-	-	-	-	rs3217095	NR	NR	none	NR	NR	none
2083	7	chr7:148506396	EZH2	C	A	-	18/19	-	-	-	-	-	rs41277434,COSM5020474	NR	NR	none	NR	NR	none
2084	7	chr7:148508780	EZH2	C	G	16/20	-	2006	1884	628	G	ggC/ggG	rs61732846	NR	NR	none	NR	NR	none
2085	7	chr7:148508833	EZH2	G	A	-	15/19	-	-	-	-	-	rs2072407	NR	NR	none	NR	NR	none
2086	7	chr7:148513756	EZH2	C	G	-	12/19	-	-	-	-	-	rs79268614	NR	NR	none	NR	NR	none
2087	7	chr7:148515192	EZH2	G	A	10/20	-	1139	1017	339	F	ttT/ttC	rs77051363,COSM6495173	NR	NR	none	NR	NR	none
2088	7	chr7:148523504	EZH2	A	T	-	8/19	-	-	-	-	-	-	NR	NR	none	NR	NR	none
2089	7	chr7:148525904	EZH2	G	C	6/20	-	675	553	185	D/H	Gac/Cac	COSM3762469	PATHOGENIC	PATHOGENIC	PATHOGENIC	Confirmed somatic variant	Reported in another cancer sample as somatic	Confirmed somatic variant			Prostate
2090	7	chr7:148525996	EZH2	G	A	-	5/19	-	-	-	-	-	rs1218676847	NR	NR	none	NR	NR	none
2091	7	chr7:148543525	EZH2	G	A	-	3/19	-	-	-	-	-	rs10274535	NR	NR	none	NR	NR	none
4216	23	chrX:63410110	FAM123B	C	T	2/2	-	3330	3057	1019	Q	caA/caG	rs61730681,COSM5019113	NR	NR	none	NR	NR	none
4217	23	chrX:63411411	FAM123B	A	G	2/2	-	2029	1756	586	R/*	Cga/Tga	COSM6599113,COSM6599114	NR	NR	none	NR	NR	none
4218	23	chrX:63411640	FAM123B	ATAGAACTCAT	-	2/2	-	1800-1801	1527-1528	509-510	-/MSSX	-/ATGAGTTCTAT	-	NR	NR	none	NR	NR	none
4219	23	chrX:63411862	FAM123B	C	G	2/2	-	1578	1305	435	G	ggC/ggG	rs761740157	NR	NR	none	NR	NR	none
4220	23	chrX:63412690	FAM123B	C	A	2/2	-	750	477	159	F/L	ttT/ttG	rs34677493,COSM5019140,COSM5019141	NR	NR	none	NR	NR	none
4221	23	chrX:63413032	FAM123B	A	G	2/2	-	408	135	45	S	tcC/tcT	rs34504794,COSM34134	NR	NR	none	NR	NR	none
3476	16	chr16:89805104	FANCA	A	G	43/43	-	4304	4273	1425	R/C	Cgt/Tgt	rs587778321,COSM6660403	NEUTRAL	NEUTRAL	none	Confirmed somatic variant	Confirmed somatic variant	Confirmed somatic variant
3477	16	chr16:89805261	FANCA	G	A	-	42/42	-	-	-	-	-	rs1800359	NR	NR	none	NR	NR	none
3478	16	chr16:89805604	FANCA	A	G	41/43	-	4135	4104	1368	F	ttC/ttT	rs375237681	NR	NR	none	NR	NR	none
3479	16	chr16:89806477	FANCA	T	C	39/43	-	3890	3859	1287	V/I	Gtt/Att	rs17227354	NR	NR	none	NR	NR	none
3480	16	chr16:89809171	FANCA	T	C	-	37/42	-	-	-	-	-	rs34420680	NR	NR	none	NR	NR	none
3481	16	chr16:89809219	FANCA	T	C	37/43	-	3785	3754	1252	E/K	Gag/Aag	rs766875357,CM125192,COSM267898	NEUTRAL	NEUTRAL	none	Confirmed somatic variant	Confirmed somatic variant	Confirmed somatic variant
3482	16	chr16:89809319	FANCA	C	T	37/43	-	3685	3654	1218	P	ccA/ccG	rs1800358	NR	NR	none	NR	NR	none
3483	16	chr16:89812930	FANCA	A	G	-	35/42	-	-	-	-	-	rs34019730	NR	NR	none	NR	NR	none
3484	16	chr16:89813093	FANCA	C	G	35/43	-	3443	3412	1138	L/V	Ctc/Gtc	rs138417003	NR	NR	none	NR	NR	none
3485	16	chr16:89813194	FANCA	T	C	-	34/42	-	-	-	-	-	rs1800355	NR	NR	none	NR	NR	none
3486	16	chr16:89813206	FANCA	G	A	-	34/42	-	-	-	-	-	rs17227191	NR	NR	none	NR	NR	none
3487	16	chr16:89815049	FANCA	C	T	-	33/42	-	-	-	-	-	rs1800347,CS137287	NR	NR	none	NR	NR	none
3488	16	chr16:89815152	FANCA	A	G	33/43	-	3294	3263	1088	S/F	tCt/tTt	rs17233497,CM992318	NR	NR	none	NR	NR	none
3489	16	chr16:89816314	FANCA	G	A	-	31/42	-	-	-	-	-	rs17227064	NR	NR	none	NR	NR	none
3490	16	chr16:89825065	FANCA	A	G	30/43	-	2932	2901	967	S	tcC/tcT	rs17226980	NR	NR	none	NR	NR	none
3491	16	chr16:89828437	FANCA	G	A	-	28/42	-	-	-	-	-	rs17233253	NR	NR	none	NR	NR	none
3492	16	chr16:89831510	FANCA	A	C	-	27/42	-	-	-	-	-	rs2159116	NR	NR	none	NR	NR	none
3493	16	chr16:89833509	FANCA	T	C	-	27/42	-	-	-	-	-	rs750775612	NR	NR	none	NR	NR	none
3494	16	chr16:89836323	FANCA	T	C	26/43	-	2457	2426	809	G/D	gGt/gAt	rs7195066	NR	NR	none	NR	NR	none
3495	16	chr16:89836478	FANCA	A	C	-	25/42	-	-	-	-	-	rs200761026	NR	NR	none	NR	NR	none
3496	16	chr16:89836899	FANCA	C	T	-	24/42	-	-	-	-	-	rs1800341	NR	NR	none	NR	NR	none
3497	16	chr16:89836908	FANCA	C	T	-	24/42	-	-	-	-	-	rs17233022	NR	NR	none	NR	NR	none
3498	16	chr16:89838136	FANCA	C	T	23/43	-	2132	2101	701	K/E	Aag/Gag	rs56369086	NR	NR	none	NR	NR	none
3499	16	chr16:89838216	FANCA	A	G	23/43	-	2052	2021	674	S/L	tCg/tTg	rs17232973,CM091881	NR	NR	none	NR	NR	none
3500	16	chr16:89839752	FANCA	T	C	22/43	-	1972	1941	647	E	gaG/gaA	rs17232917	NR	NR	none	NR	NR	none
3501	16	chr16:89839766	FANCA	C	G	22/43	-	1958	1927	643	P/A	Ccc/Gcc	rs17232910	NR	NR	none	NR	NR	none
3502	16	chr16:89845194	FANCA	G	A	-	20/42	-	-	-	-	-	rs1800337	NR	NR	none	NR	NR	none
3503	16	chr16:89845287	FANCA	G	A	-	19/42	-	-	-	-	-	rs2302162	NR	NR	none	NR	NR	none
3504	16	chr16:89849480	FANCA	T	C	16/43	-	1532	1501	501	G/S	Ggc/Agc	rs2239359,CM137880	NR	NR	none	NR	NR	none
3505	16	chr16:89857743	FANCA	C	G	-	14/42	-	-	-	-	-	-	NR	NR	none	NR	NR	none
3506	16	chr16:89857880	FANCA	T	C	14/43	-	1321	1290	430	A	gcG/gcA	rs1800332	NR	NR	none	NR	NR	none
3507	16	chr16:89857935	FANCA	A	G	14/43	-	1266	1235	412	A/V	gCg/gTg	rs11646374	NR	NR	none	NR	NR	none
3508	16	chr16:89858417	FANCA	A	C	13/43	-	1174	1143	381	T	acG/acT	rs1800331	NR	NR	none	NR	NR	none
3509	16	chr16:89858505	FANCA	C	T	-	12/42	-	-	-	-	-	rs6500452	NR	NR	none	NR	NR	none
3510	16	chr16:89862388	FANCA	G	A	11/43	-	963	932	311	I/T	aTt/aCt	rs75501942	NR	NR	none	NR	NR	none
3511	16	chr16:89866043	FANCA	C	T	9/43	-	827	796	266	T/A	Acg/Gcg	rs7190823,CM137879	NR	NR	none	NR	NR	none
3512	16	chr16:89869761	FANCA	C	T	-	7/42	-	-	-	-	-	rs1800286	NR	NR	none	NR	NR	none
3513	16	chr16:89871696	FANCA	G	A	7/43	-	732	701	234	M/T	aTg/aCg	rs145869646	NR	NR	none	NR	NR	none
3514	16	chr16:89874628	FANCA	T	C	-	6/42	-	-	-	-	-	rs1800285	NR	NR	none	NR	NR	none
3515	16	chr16:89877134	FANCA	C	T	5/43	-	534	503	168	Q/R	cAa/cGa	rs750882394	NR	NR	none	NR	NR	none
3516	16	chr16:89877320	FANCA	A	C	-	4/42	-	-	-	-	-	-	NR	NR	none	NR	NR	none
2448	9	chr9:97888854	FANCC	T	C	9/15	-	1108	853	285	A/T	Gcc/Acc	COSM6962795	NR	PATHOGENIC	PATHOGENIC	NR	Confirmed somatic variant	Confirmed somatic variant
2449	9	chr9:97912156	FANCC	C	T	-	7/14	-	-	-	-	-	rs1050448829	NR	NR	none	NR	NR	none
2450	9	chr9:98011497	FANCC	A	G	2/15	-	332	77	26	S/F	tCc/tTc	rs1800361	NR	NR	none	NR	NR	none
770	3	chr3:10070336	FANCD2	C	G	2/43	-	88	-	-	-	-	rs3732974	NR	NR	none	NR	NR	none
771	3	chr3:10070417	FANCD2	C	G	-	2/42	-	-	-	-	-	rs9833228	NR	NR	none	NR	NR	none
772	3	chr3:10074646	FANCD2	C	G	3/43	-	288	195	65	Q/H	caG/caC	rs36084488	NR	NR	none	NR	NR	none
773	3	chr3:10081374	FANCD2	A	G	-	8/42	-	-	-	-	-	rs35749514	NR	NR	none	NR	NR	none
774	3	chr3:10084224	FANCD2	T	C	-	10/42	-	-	-	-	-	rs9879080	NR	NR	none	NR	NR	none
775	3	chr3:10085130	FANCD2	G	C	-	12/42	-	-	-	-	-	rs9809061	NR	NR	none	NR	NR	none
776	3	chr3:10088223	FANCD2	G	T	-	14/42	-	-	-	-	-	rs200221245	NR	NR	none	NR	NR	none
777	3	chr3:10088239	FANCD2	A	G	-	14/42	-	-	-	-	-	rs201770712	NR	NR	none	NR	NR	none
778	3	chr3:10088242	FANCD2	A	G	-	14/42	-	-	-	-	-	rs199726231	NR	NR	none	NR	NR	none
779	3	chr3:10088266	FANCD2	T	G	15/43	-	1230	1137	379	V	gtG/gtT	rs72492997	NR	NR	none	NR	NR	none
780	3	chr3:10088295	FANCD2	G	A	15/43	-	1259	1166	389	Y/C	tAt/tGt	-	NR	NR	none	NR	NR	none
781	3	chr3:10088299	FANCD2	T	C	15/43	-	1263	1170	390	S	agC/agT	rs112887807	NR	NR	none	NR	NR	none
782	3	chr3:10088308	FANCD2	C	T	15/43	-	1272	1179	393	T	acT/acC	rs72492998	NR	NR	none	NR	NR	none
783	3	chr3:10088343	FANCD2	G	A	15/43	-	1307	1214	405	N/S	aAt/aGt	rs73126218	NR	NR	none	NR	NR	none
784	3	chr3:10091035	FANCD2	C	T	-	16/42	-	-	-	-	-	rs10222446	NR	NR	none	NR	NR	none
785	3	chr3:10106515	FANCD2	C	T	23/43	-	2217	2124	708	F	ttT/ttC	rs9809716	NR	NR	none	NR	NR	none
786	3	chr3:10106532	FANCD2	T	C	23/43	-	2234	2141	714	P/L	cCg/cTg	rs3864017	NR	NR	none	NR	NR	none
787	3	chr3:10107215	FANCD2	G	A	-	24/42	-	-	-	-	-	rs34323624	NR	NR	none	NR	NR	none
788	3	chr3:10107520	FANCD2	T	G	-	24/42	-	-	-	-	-	rs34608006	NR	NR	none	NR	NR	none
789	3	chr3:10108991	FANCD2	A	G	26/43	-	2577	2484	828	K	aaG/aaA	rs55980657	NR	NR	none	NR	NR	none
790	3	chr3:10128824	FANCD2	T	C	34/43	-	3435	3342	1114	S	agC/agT	rs953039787	NR	NR	none	NR	NR	none
791	3	chr3:10132031	FANCD2	-	A	37/43	-	3832	3739	1247	K/X	Aaa/aa	-	NR	NR	none	NR	NR	none
792	3	chr3:10133949	FANCD2	G	A	-	38/42	-	-	-	-	-	rs9811771	NR	NR	none	NR	NR	none
793	3	chr3:10138069	FANCD2	G	T	42/43	-	4191	4098	1366	L	ctT/ctG	rs2272125,CM066071	NR	NR	none	NR	NR	none
794	3	chr3:10142949	FANCD2	T	C	-	-	-	-	-	-	-	rs3172417	NR	NR	none	NR	NR	none
2722	11	chr11:22646398	FANCF	A	G	1/1	-	990	959	320	P/L	cCt/cTt	rs45451294	NR	NR	none	NR	NR	none
2723	11	chr11:22646547	FANCF	G	C	1/1	-	841	810	270	L	ctG/ctC	rs1288598427	NR	NR	none	NR	NR	none
2724	11	chr11:22646800	FANCF	A	G	1/1	-	588	557	186	A/V	gCc/gTc	rs113910234	NR	NR	none	NR	NR	none
2725	11	chr11:22647366	FANCF	A	G	1/1	-	22	-	-	-	-	rs3740615	NR	NR	none	NR	NR	none
2421	9	chr9:35074451	FANCG	T	C	13/14	-	2169	1677	559	K	aaG/aaA	rs779403243	NR	NR	none	NR	NR	none
2422	9	chr9:35074917	FANCG	C	T	-	12/13	-	-	-	-	-	rs587118	NR	NR	none	NR	NR	none
2423	9	chr9:35076517	FANCG	A	G	8/14	-	1480	988	330	P/S	Cca/Tca	rs4986940	NR	NR	none	NR	NR	none
2424	9	chr9:35076755	FANCG	A	G	7/14	-	1382	890	297	T/I	aCa/aTa	rs2237857,CM015016,COSM150601	NR	PATHOGENIC	PATHOGENIC	NR	Variant of unknown origin	none
2425	9	chr9:35077441	FANCG	C	T	-	4/13	-	-	-	-	-	rs554098	NR	NR	none	NR	NR	none
3694	17	chr17:59763114	FANCJ	T	A	-	19/19	-	-	-	-	-	rs4988357	NR	NR	none	NR	NR	none
3696	17	chr17:59821814	FANCJ	C	T	15/20	-	2504	2236	746	I/V	Atc/Gtc	rs111536363	NR	NR	none	NR	NR	none
3699	17	chr17:59926634	FANCJ	-	A	-	4/19	-	-	-	-	-	rs768773789	NR	NR	none	NR	NR	none
3700	17	chr17:59926645	FANCJ	T	C	-	4/19	-	-	-	-	-	rs4988343	NR	NR	none	NR	NR	none
3701	17	chr17:59934613	FANCJ	G	A	-	3/19	-	-	-	-	-	rs2048717	NR	NR	none	NR	NR	none
3692	17	chr17:59760996	FANCJ-BRIP1	G	A	20/20	-	3679	3411	1137	Y	taT/taC	rs4986763	NR	NR	none	NR	NR	none
3695	17	chr17:59763347	FANCJ-BRIP1	G	A	19/20	-	3023	2755	919	S/P	Tca/Cca	rs4986764,CM046104	NR	NR	none	NR	NR	none
2641	10	chr10:90767482	FAS	G	A	3/9	-	442	222	74	T	acA/acG	rs2229521,CM994747	NR	NR	none	NR	NR	none
2642	10	chr10:90767640	FAS	T	C	-	3/8	-	-	-	-	-	rs2296601	NR	NR	none	NR	NR	none
2643	10	chr10:90770374	FAS	A	G	-	5/8	-	-	-	-	-	rs767973417	NR	NR	none	NR	NR	none
2644	10	chr10:90770439	FAS	G	C	-	5/8	-	-	-	-	-	rs2296600	NR	NR	none	NR	NR	none
2645	10	chr10:90771767	FAS	A	G	7/9	-	800	580	194	E/K	Gaa/Aaa	rs56006128,CD101621,CM065175	NR	NR	none	NR	NR	none
2646	10	chr10:90771829	FAS	C	T	7/9	-	862	642	214	T	acT/acC	rs2234978,CM045201	NR	NR	none	NR	NR	none
3895	19	chr19:8146019	FBN3	G	T	-	58/63	-	-	-	-	-	-	NR	NR	none	NR	NR	none
1196	4	chr4:153244077	FBXW7	A	C	12/12	-	3310	2080	694	E/*	Gaa/Taa	-	NR	NR	none	NR	NR	none
1197	4	chr4:153249510	FBXW7	A	C	9/12	-	2498	1268	423	G/V	gGa/gTa	rs1157879635,COSM1052095,COSM1052096,COSM1052097,COSM1154295,COSM22984,COSM5751152,COSM5751153,COSM5751154,COSM5751155,COSM5751156,COSM6854281	PATHOGENIC	PATHOGENIC	PATHOGENIC	Confirmed somatic variant	Confirmed somatic variant	Confirmed somatic variant
1198	4	chr4:153250883	FBXW7	A	G	8/12	-	2407	1177	393	R/*	Cga/Tga	COSM1052102,COSM1052103,COSM1052104,COSM1154296,COSM22973,COSM6854476	PATHOGENIC	PATHOGENIC	PATHOGENIC	Confirmed somatic variant	Confirmed somatic variant	Confirmed somatic variant
2165	8	chr8:38272357	FGFR1	A	T	15/19	-	2333	2010	670	I	atA/atT	-	NR	NR	none	NR	NR	none
2166	8	chr8:38279295	FGFR1	A	G	-	9/18	-	-	-	-	-	rs17175982	NR	NR	none	NR	NR	none
2167	8	chr8:38282202	FGFR1	T	C	8/19	-	1177	854	285	R/Q	cGg/cAg	CM066810,COSM3413001,COSM3413002,COSM3413003,COSM3413004,COSM3413005,COSM3413006	NR	PATHOGENIC	PATHOGENIC	NR	Confirmed somatic variant	Confirmed somatic variant
2168	8	chr8:38287247	FGFR1	A	C	4/19	-	733	410	137	S/I	aGc/aTc	COSM6953166,COSM6953167,COSM6953168,COSM6953169,COSM6953170	NR	NEUTRAL	none	NR	Confirmed somatic variant	Confirmed somatic variant
2169	8	chr8:38314987	FGFR1	A	G	3/19	-	400	77	26	P/L	cCa/cTa	rs770617767	NR	NR	none	NR	NR	none
2685	10	chr10:123239112	FGFR2	A	G	-	-	-	-	-	-	-	rs1047057	NR	NR	none	NR	NR	none
2686	10	chr10:123239115	FGFR2	T	C	-	-	-	-	-	-	-	rs763095219	NR	NR	none	NR	NR	none
2687	10	chr10:123243197	FGFR2	A	G	-	17/17	-	-	-	-	-	rs2278202	NR	NR	none	NR	NR	none
2688	10	chr10:123246886	FGFR2	C	T	15/18	-	2634	2042	681	Y/C	tAc/tGc	-	NR	NR	none	NR	NR	none
2689	10	chr10:123247550	FGFR2	A	G	14/18	-	2536	1944	648	L	ctC/ctT	rs35337478	NR	NR	none	NR	NR	none
2690	10	chr10:123247644	FGFR2	C	A	-	13/17	-	-	-	-	-	rs3135802	NR	NR	none	NR	NR	none
2691	10	chr10:123260408	FGFR2	A	G	11/18	-	2088	1496	499	A/V	gCg/gTg	COSM5483441,COSM5483442,COSM5483443,COSM5483444,COSM5483445	PATHOGENIC	NR	PATHOGENIC	Confirmed somatic variant	NR	Confirmed somatic variant
2692	10	chr10:123263478	FGFR2	G	C	-	9/17	-	-	-	-	-	rs3135774	NR	NR	none	NR	NR	none
2693	10	chr10:123279676	FGFR2	T	C	7/18	-	1348	756	252	S	tcG/tcA	rs138769323,CP973591,COSM4012193,COSM4012194,COSM4012195,COSM4012196,COSM4012197	NR	NEUTRAL	none	NR	Confirmed somatic variant	Confirmed somatic variant
2694	10	chr10:123298158	FGFR2	C	T	6/18	-	1288	696	232	V	gtA/gtG	rs1047100	NR	NR	none	NR	NR	none
2695	10	chr10:123325158	FGFR2	A	G	3/18	-	762	170	57	S/L	tCg/tTg	rs56226109,COSM6854612	PATHOGENIC	NR	PATHOGENIC	Variant of unknown origin	NR	none
1060	4	chr4:1801021	FGFR3	T	C	3/18	-	406	150	50	V	gtC/gtT	rs750641928	NR	NR	none	NR	NR	none
1061	4	chr4:1801219	FGFR3	T	C	3/18	-	604	348	116	R	cgC/cgT	rs2305179,COSM5019781	NR	NR	none	NR	NR	none
1062	4	chr4:1801511	FGFR3	T	C	4/18	-	673	417	139	D	gaC/gaT	rs3135867	NR	NR	none	NR	NR	none
1063	4	chr4:1801542	FGFR3	G	A	-	4/17	-	-	-	-	-	rs3135868,COSM5019818	NR	NR	none	NR	NR	none
1064	4	chr4:1803307	FGFR3	C	T	-	5/17	-	-	-	-	-	rs2305183	NR	NR	none	NR	NR	none
1065	4	chr4:1803326	FGFR3	-	C	-	5/17	-	-	-	-	-	-	NR	NR	none	NR	NR	none
1066	4	chr4:1803394	FGFR3	A	G	6/18	-	919	663	221	S	tcG/tcA	rs114421370	NR	NR	none	NR	NR	none
1067	4	chr4:1803704	FGFR3	C	T	7/18	-	1138	882	294	N	aaT/aaC	rs2234909,COSM1428696	NR	NR	none	NR	NR	none
1068	4	chr4:1803824	FGFR3	G	C	-	7/17	-	-	-	-	-	rs2305184	NR	NR	none	NR	NR	none
1069	4	chr4:1805568	FGFR3	T	C	-	8/17	-	-	-	-	-	rs3135885,COSM5019820	NR	NEUTRAL	none	NR	Confirmed somatic variant	Confirmed somatic variant
1070	4	chr4:1805593	FGFR3	C	G	-	8/17	-	-	-	-	-	rs3135886	NR	NR	none	NR	NR	none
1071	4	chr4:1807249	FGFR3	A	G	-	11/17	-	-	-	-	-	rs542820391	NR	NR	none	NR	NR	none
1072	4	chr4:1807478	FGFR3	T	G	13/18	-	1909	1653	551	G	ggG/ggT	rs3135897,COSM4158930,COSM4158931	PATHOGENIC	PATHOGENIC	PATHOGENIC	Confirmed somatic variant	Confirmed somatic variant	Confirmed somatic variant
1073	4	chr4:1807545	FGFR3	-	C	13/18	-	1976	1720	574	P/X	Ccc/cc	-	NR	NR	none	NR	NR	none
1074	4	chr4:1807894	FGFR3	A	G	14/18	-	2215	1959	653	T	acG/acA	rs7688609	NR	NR	none	NR	NR	none
1075	4	chr4:1808286	FGFR3	A	G	16/18	-	2306	2050	684	V/I	Gtc/Atc	COSM6854620,COSM6920071,COSM6920072	PATHOGENIC	PATHOGENIC	PATHOGENIC	Variant of unknown origin	Confirmed somatic variant	Confirmed somatic variant
1076	4	chr4:1808391	FGFR3	A	G	16/18	-	2411	2155	719	A/T	Gcc/Acc	rs17882190	NR	NR	none	NR	NR	none
1077	4	chr4:1808515	FGFR3	T	C	-	16/17	-	-	-	-	-	rs2305187	NR	NR	none	NR	NR	none
1369	5	chr5:176516631	FGFR4	A	G	2/18	-	273	28	10	V/I	Gtc/Atc	rs1966265	NR	NR	none	NR	NR	none
1370	5	chr5:176517461	FGFR4	G	T	3/18	-	407	162	54	R	cgT/cgG	rs446382	NR	NR	none	NR	NR	none
1371	5	chr5:176517474	FGFR4	T	C	3/18	-	420	175	59	R/W	Cgg/Tgg	rs200344385,COSM1754192,COSM1754193,COSM6918207,COSM6918208	NEUTRAL	NEUTRAL	none	Confirmed somatic variant	Confirmed somatic variant	Confirmed somatic variant
1372	5	chr5:176517740	FGFR4	T	A	-	3/17	-	-	-	-	-	rs376400659	NR	NR	none	NR	NR	none
1373	5	chr5:176517797	FGFR4	C	T	4/18	-	652	407	136	P/L	cCc/cTc	rs376618	NR	NR	none	NR	NR	none
1374	5	chr5:176518784	FGFR4	T	C	6/18	-	947	702	234	R	cgC/cgT	rs452885	NR	NR	none	NR	NR	none
1375	5	chr5:176520243	FGFR4	A	G	9/18	-	1407	1162	388	G/R	Ggg/Agg	rs351855,CM023917	NR	NR	none	NR	NR	none
1376	5	chr5:176520431	FGFR4	A	G	10/18	-	1521	1276	426	G/S	Ggc/Agc	rs55879131	NR	NR	none	NR	NR	none
1377	5	chr5:176520463	FGFR4	A	G	10/18	-	1553	1308	436	V	gtG/gtA	-	NR	NR	none	NR	NR	none
1378	5	chr5:176522562	FGFR4	T	C	13/18	-	1904	1659	553	A	gcC/gcT	rs351854	NR	NR	none	NR	NR	none
1379	5	chr5:176522728	FGFR4	T	C	-	13/17	-	-	-	-	-	rs42409	NR	NR	none	NR	NR	none
1380	5	chr5:176523562	FGFR4	A	C	-	15/17	-	-	-	-	-	rs31777	NR	NR	none	NR	NR	none
481	1	chr1:241663825	FH	A	G	9/10	-	1341	1302	434	C	tgC/tgT	rs2070080,COSM1238897	NR	NEUTRAL	none	NR	Variant of unknown origin	none
482	1	chr1:241663902	FH	A	T	-	8/9	-	-	-	-	-	rs74405673	NR	NR	none	NR	NR	none
483	1	chr1:241667523	FH	T	C	7/10	-	966	927	309	P	ccG/ccA	rs61737760	NR	NR	none	NR	NR	none
484	1	chr1:241669249	FH	T	C	-	6/9	-	-	-	-	-	rs12065955	NR	NR	none	NR	NR	none
485	1	chr1:241677035	FH	A	T	-	2/9	-	-	-	-	-	rs2275162	NR	NR	none	NR	NR	none
3591	17	chr17:17118442	FLCN	C	T	-	12/13	-	-	-	-	-	rs34235236	NR	NR	none	NR	NR	none
3592	17	chr17:17119761	FLCN	T	C	11/14	-	1688	1233	411	E	gaG/gaA	rs61750032	NR	NR	none	NR	NR	none
3593	17	chr17:17124664	FLCN	C	G	-	8/13	-	-	-	-	-	rs371396942	NR	NR	none	NR	NR	none
3594	17	chr17:17124815	FLCN	T	C	-	8/13	-	-	-	-	-	rs3744124	NR	NR	none	NR	NR	none
3595	17	chr17:17125868	FLCN	A	T	7/14	-	1181	726	242	T	acA/acT	rs113938514	NR	NR	none	NR	NR	none
3596	17	chr17:17127470	FLCN	T	C	-	5/13	-	-	-	-	-	rs3744123	NR	NR	none	NR	NR	none
3597	17	chr17:17127471	FLCN	A	G	-	5/13	-	-	-	-	-	rs1736219	NR	NR	none	NR	NR	none
2864	11	chr11:128651893	FLI1	G	A	5/9	-	1119	630	210	Q	caA/caG	rs35195224	NR	NR	none	NR	NR	none
2865	11	chr11:128675292	FLI1	A	T	6/9	-	1176	687	229	A	gcT/gcA	rs7113191	NR	NR	none	NR	NR	none
3038	13	chr13:28883061	FLT1	A	G	28/30	-	3891	3639	1213	Y	taC/taT	rs7993418	NR	NR	none	NR	NR	none
3039	13	chr13:28886113	FLT1	G	A	-	26/29	-	-	-	-	-	rs7328692	NR	NR	none	NR	NR	none
3040	13	chr13:28893642	FLT1	G	A	24/30	-	3456	3204	1068	P	ccT/ccC	rs2296189	NR	NR	none	NR	NR	none
3041	13	chr13:28893688	FLT1	A	G	-	23/29	-	-	-	-	-	rs61762459	NR	NR	none	NR	NR	none
3042	13	chr13:28895524	FLT1	C	G	-	23/29	-	-	-	-	-	rs2296190	NR	NR	none	NR	NR	none
3043	13	chr13:28896979	FLT1	T	C	21/30	-	3153	2901	967	A	gcG/gcA	rs56314249	NR	NR	none	NR	NR	none
3044	13	chr13:28964198	FLT1	T	C	13/30	-	1956	1704	568	T	acG/acA	rs17537350	NR	NR	none	NR	NR	none
3045	13	chr13:28979994	FLT1	A	G	11/30	-	1726	1474	492	L	Ctg/Ttg	rs55675306,COSM269183	PATHOGENIC	NR	PATHOGENIC	Confirmed somatic variant	NR	Confirmed somatic variant
3046	13	chr13:29001366	FLT1	A	C	10/30	-	1618	1366	456	A/S	Gca/Tca	COSM4046896,COSM4046897,COSM4046898	NEUTRAL	NEUTRAL	none	Confirmed somatic variant	Confirmed somatic variant	Confirmed somatic variant
3047	13	chr13:29001430	FLT1	A	G	10/30	-	1554	1302	434	A	gcC/gcT	rs61763178	NR	NR	none	NR	NR	none
3048	13	chr13:29041007	FLT1	T	A	-	3/29	-	-	-	-	-	rs3751398	NR	NR	none	NR	NR	none
3019	13	chr13:28578283	FLT3	A	G	24/24	-	2970	2888	963	S/L	tCg/tTg	rs138003347,COSM6854624	NEUTRAL	NEUTRAL	none	Variant of unknown origin	Variant of unknown origin	none
3020	13	chr13:28592546	FLT3	C	T	-	20/23	-	-	-	-	-	rs17086226	NR	NR	none	NR	NR	none
3021	13	chr13:28597449	FLT3	-	CT	-	19/23	-	-	-	-	-	-	NR	NR	none	NR	NR	none
3022	13	chr13:28597593	FLT3	G	T	19/24	-	2394	2312	771	Q/P	cAa/cCa	rs149791635,COSM5020310	NR	NEUTRAL	none	NR	Confirmed somatic variant	Confirmed somatic variant
3023	13	chr13:28602292	FLT3	C	T	-	16/23	-	-	-	-	-	rs75580865	NR	NR	none	NR	NR	none
3024	13	chr13:28608459	FLT3	C	T	13/24	-	1765	1683	561	L	ctA/ctG	rs34374211,COSM19740	NR	NEUTRAL	none	NR	Reported in another cancer sample as somatic	none
3025	13	chr13:28608500	FLT3	A	T	13/24	-	1724	1642	548	I/F	Att/Ttt	COSM5945300	NR	NEUTRAL	none	NR	Variant of unknown origin	none
3026	13	chr13:28609825	FLT3	G	A	-	11/23	-	-	-	-	-	rs2491227	NR	NR	none	NR	NR	none
3027	13	chr13:28610045	FLT3	C	T	-	11/23	-	-	-	-	-	rs73154803	NR	NR	none	NR	NR	none
3028	13	chr13:28610152	FLT3	T	C	11/24	-	1420	1338	446	S	tcG/tcA	rs146109614,COSM7183782	NR	NEUTRAL	none	NR	Confirmed somatic variant	Confirmed somatic variant
3029	13	chr13:28610183	FLT3	A	G	-	10/23	-	-	-	-	-	rs2491231,COSM3999060	NR	NEUTRAL	none	NR	Confirmed somatic variant	Confirmed somatic variant
3030	13	chr13:28611382	FLT3	G	T	10/24	-	1331	1249	417	I/L	Ata/Cta	rs56090538	NR	NR	none	NR	NR	none
3031	13	chr13:28623524	FLT3	T	C	8/24	-	1115	1033	345	V/I	Gta/Ata	rs371030554,COSM6977168	NR	NEUTRAL	none	NR	Confirmed somatic variant	Confirmed somatic variant
3032	13	chr13:28623699	FLT3	T	G	-	7/23	-	-	-	-	-	rs9507985	NR	NR	none	NR	NR	none
3033	13	chr13:28623759	FLT3	T	C	-	7/23	-	-	-	-	-	rs9513004	NR	NR	none	NR	NR	none
3034	13	chr13:28626716	FLT3	T	C	5/24	-	662	580	194	V/M	Gtg/Atg	rs146030737,COSM28039	NR	NEUTRAL	none	NR	Reported in another cancer sample as somatic	none
3035	13	chr13:28626753	FLT3	T	G	5/24	-	625	543	181	A	gcC/gcA	rs767657203	NR	NR	none	NR	NR	none
3036	13	chr13:28635997	FLT3	T	C	-	3/23	-	-	-	-	-	rs748664578	NR	NR	none	NR	NR	none
3037	13	chr13:28636084	FLT3	G	A	3/24	-	370	288	96	D	gaC/gaT	rs7338903,COSM6494233	NR	NR	none	NR	NR	none
1401	5	chr5:180030132	FLT4	T	C	30/30	-	4231	-	-	-	-	rs113034305	NR	NR	none	NR	NR	none
1402	5	chr5:180030221	FLT4	T	C	30/30	-	4142	4063	1355	V/M	Gtg/Atg	rs143739828	NR	NR	none	NR	NR	none
1403	5	chr5:180035995	FLT4	G	C	29/30	-	3945	3866	1289	S/T	aGc/aCc	-	NR	NR	none	NR	NR	none
1404	5	chr5:180043388	FLT4	A	G	23/30	-	3277	3198	1066	P	ccC/ccT	rs1130378,COSM6489746,COSM6489747	NR	NEUTRAL	none	NR	Confirmed somatic variant	Confirmed somatic variant
1405	5	chr5:180043439	FLT4	A	G	23/30	-	3226	3147	1049	D	gaC/gaT	rs56127961,COSM3393497,COSM3393498	NR	NEUTRAL	none	NR	Confirmed somatic variant	Confirmed somatic variant
1406	5	chr5:180043918	FLT4	T	C	22/30	-	3157	3078	1026	E	gaG/gaA	COSM4186885,COSM4186886	NR	PATHOGENIC	PATHOGENIC	NR	Confirmed somatic variant	Confirmed somatic variant
1407	5	chr5:180046344	FLT4	C	G	19/30	-	2749	2670	890	H/Q	caC/caG	rs448012	NR	NR	none	NR	NR	none
1408	5	chr5:180047863	FLT4	G	C	-	15/29	-	-	-	-	-	rs423086	NR	NR	none	NR	NR	none
1409	5	chr5:180048035	FLT4	C	T	-	14/29	-	-	-	-	-	rs2242215	NR	NR	none	NR	NR	none
1410	5	chr5:180048316	FLT4	G	C	-	13/29	-	-	-	-	-	rs2242213	NR	NR	none	NR	NR	none
1411	5	chr5:180051003	FLT4	C	T	11/30	-	1559	1480	494	T/A	Acg/Gcg	rs307826	NR	NR	none	NR	NR	none
1412	5	chr5:180052946	FLT4	A	G	10/30	-	1423	1344	448	Y	taC/taT	rs3736062	NR	NR	none	NR	NR	none
1413	5	chr5:180053307	FLT4	G	A	-	8/29	-	-	-	-	-	rs402647	NR	NR	none	NR	NR	none
1414	5	chr5:180055849	FLT4	G	T	-	8/29	-	-	-	-	-	rs75361132	NR	NR	none	NR	NR	none
1415	5	chr5:180055862	FLT4	G	T	-	2020-08-29	-	-	-	-	-	rs383985	NR	NR	none	NR	NR	none
1416	5	chr5:180055864	FLT4	A	G	-	8/29	-	-	-	-	-	rs438464	NR	NR	none	NR	NR	none
1417	5	chr5:180056863	FLT4	T	C	-	5/29	-	-	-	-	-	rs56361806	NR	NR	none	NR	NR	none
1418	5	chr5:180057263	FLT4	C	G	4/30	-	554	475	159	L/V	Ctg/Gtg	rs147634448	NR	NR	none	NR	NR	none
1419	5	chr5:180057293	FLT4	C	T	4/30	-	524	445	149	N/D	Aac/Gac	rs34221241	NR	NR	none	NR	NR	none
710	2	chr2:216229692	FN1	G	A	44/46	-	7531	7161	2387	Y	taT/taC	rs11651	NR	NR	none	NR	NR	none
711	2	chr2:216230216	FN1	C	G	-	43/45	-	-	-	-	-	rs10498037	NR	NR	none	NR	NR	none
712	2	chr2:216232553	FN1	G	A	-	42/45	-	-	-	-	-	-	NR	NR	none	NR	NR	none
713	2	chr2:216232556	FN1	T	C	-	42/45	-	-	-	-	-	rs7568287	NR	NR	none	NR	NR	none
714	2	chr2:216234981	FN1	C	G	-	41/45	-	-	-	-	-	rs55739979	NR	NR	none	NR	NR	none
715	2	chr2:216235089	FN1	T	C	41/46	-	7151	6781	2261	V/I	Gtc/Atc	rs1250209	NR	NR	none	NR	NR	none
716	2	chr2:216236712	FN1	C	T	40/46	-	7004	6634	2212	I/V	Atc/Gtc	rs17449032	NR	NR	none	NR	NR	none
717	2	chr2:216237084	FN1	C	G	40/46	-	6632	6262	2088	L/V	Ctg/Gtg	-	NR	NR	none	NR	NR	none
718	2	chr2:216240127	FN1	-	AC	-	37/45	-	-	-	-	-	rs3214672	NR	NR	none	NR	NR	none
719	2	chr2:216242917	FN1	A	T	35/46	-	6061	5691	1897	G	ggA/ggT	rs1132741	NR	NR	none	NR	NR	none
720	2	chr2:216242998	FN1	C	G	-	34/45	-	-	-	-	-	rs192981567	NR	NR	none	NR	NR	none
721	2	chr2:216243903	FN1	A	C	34/46	-	5942	5572	1858	E/*	Gaa/Taa	COSM2717247,COSM2717248	PATHOGENIC	NR	PATHOGENIC	Variant of unknown origin	NR	none
722	2	chr2:216248708	FN1	-	AA	-	30/45	-	-	-	-	-	rs35639338	NR	NR	none	NR	NR	none
723	2	chr2:216249587	FN1	T	C	29/46	-	5095	4725	1575	E	gaG/gaA	rs13652	NR	NR	none	NR	NR	none
724	2	chr2:216251697	FN1	A	G	-	27/45	-	-	-	-	-	rs35343655	NR	NR	none	NR	NR	none
725	2	chr2:216253039	FN1	C	G	-	26/45	-	-	-	-	-	rs1250215	NR	NR	none	NR	NR	none
726	2	chr2:216256344	FN1	G	C	-	26/45	-	-	-	-	-	rs10498038	NR	NR	none	NR	NR	none
727	2	chr2:216261851	FN1	T	C	-	23/45	-	-	-	-	-	rs79229169	NR	NR	none	NR	NR	none
728	2	chr2:216269209	FN1	G	T	20/46	-	3526	3156	1052	P	ccA/ccC	rs1053238	NR	NR	none	NR	NR	none
729	2	chr2:216269254	FN1	G	T	20/46	-	3481	3111	1037	G	ggA/ggC	rs7589580	NR	NR	none	NR	NR	none
730	2	chr2:216271271	FN1	A	G	-	18/45	-	-	-	-	-	rs866422093	NR	NR	none	NR	NR	none
731	2	chr2:216271812	FN1	T	A	-	18/45	-	-	-	-	-	rs7592898	NR	NR	none	NR	NR	none
732	2	chr2:216272792	FN1	C	G	-	17/45	-	-	-	-	-	rs2577300	NR	NR	none	NR	NR	none
733	2	chr2:216272819	FN1	G	C	-	17/45	-	-	-	-	-	rs7570208	NR	NR	none	NR	NR	none
734	2	chr2:216272900	FN1	T	G	17/46	-	2819	2449	817	T/P	Acg/Ccg	rs2577301	NR	NR	none	NR	NR	none
735	2	chr2:216272907	FN1	T	A	17/46	-	2812	2442	814	P	ccT/ccA	rs7596677	NR	NR	none	NR	NR	none
736	2	chr2:216272944	FN1	G	A	-	16/45	-	-	-	-	-	rs78792206	NR	NR	none	NR	NR	none
737	2	chr2:216272993	FN1	A	C	-	16/45	-	-	-	-	-	-	NR	NR	none	NR	NR	none
738	2	chr2:216274854	FN1	-	AC	-	13/45	-	-	-	-	-	rs796781337	NR	NR	none	NR	NR	none
739	2	chr2:216283958	FN1	A	T	-	12/45	-	-	-	-	-	rs3796123	NR	NR	none	NR	NR	none
740	2	chr2:216288841	FN1	C	T	-	8/45	-	-	-	-	-	rs56137176	NR	NR	none	NR	NR	none
741	2	chr2:216289032	FN1	A	G	8/46	-	1423	1053	351	Y	taC/taT	rs202133752	NR	NR	none	NR	NR	none
742	2	chr2:216298084	FN1	A	G	3/46	-	748	378	126	I	atC/atT	rs2289202	NR	NR	none	NR	NR	none
743	2	chr2:216300405	FN1	C	A	1/46	-	491	121	41	S/A	Tcc/Gcc	rs112946345	NR	NR	none	NR	NR	none
744	2	chr2:216300482	FN1	A	T	1/46	-	414	44	15	Q/L	cAg/cTg	rs1250259	NR	NR	none	NR	NR	none
976	3	chr3:138665029	FOXL2	C	G	1/1	-	954	536	179	A/G	gCg/gGg	rs7432551,COSM4600643	NR	NEUTRAL	none	NR	Variant of unknown origin	none
977	3	chr3:138665064	FOXL2	A	G	1/1	-	919	501	167	F	ttC/ttT	rs61750361,CP015788	NR	NR	none	NR	NR	none
3049	13	chr13:41134571	FOXO1	A	C	2/3	-	1442	1057	353	A/S	Gca/Tca	rs760394095,COSM5970984,COSM5970985	NR	NEUTRAL	none	NR	Confirmed somatic variant	Confirmed somatic variant
3050	13	chr13:41134629	FOXO1	A	G	2/3	-	1384	999	333	T	acC/acT	rs139436481	NR	NR	none	NR	NR	none
3051	13	chr13:41134840	FOXO1	C	A	2/3	-	1173	788	263	F/C	tTt/tGt	-	NR	NR	none	NR	NR	none
3052	13	chr13:41240255	FOXO1	T	A	1/3	-	480	95	32	F/Y	tTt/tAt	rs866785231	NR	NR	none	NR	NR	none
1640	6	chr6:108883076	FOXO3	T	C	-	1/2	-	-	-	-	-	rs1490581885	NR	NR	none	NR	NR	none
1641	6	chr6:108985057	FOXO3	A	G	2/3	-	1364	1021	341	A/T	Gcg/Acg	rs145259784	NR	NR	none	NR	NR	none
1642	6	chr6:108985258	FOXO3	G	A	2/3	-	1565	1222	408	M/V	Atg/Gtg	-	NR	NR	none	NR	NR	none
934	3	chr3:71064802	FOXP1	G	A	7/16	-	1032	878	293	L/S	tTg/tCg	rs542877012	NR	NR	none	NR	NR	none
935	3	chr3:71161801	FOXP1	C	A	-	1/15	-	-	-	-	-	rs139264797	NR	NR	none	NR	NR	none
936	3	chr3:71179709	FOXP1	C	-	2020-01-16	-	280-281	126-127	42-43	-/X	-/G	-	NR	NR	none	NR	NR	none
937	3	chr3:71179808	FOXP1	G	A	1/16	-	181	27	9	S	agT/agC	rs769619137	NR	NR	none	NR	NR	none
938	3	chr3:71247576	FOXP1	T	A	-	5/20	-	-	-	-	-	rs9855825	NR	NR	none	NR	NR	none
1469	6	chr6:41533579	FOXP4	A	C	2/17	-	539	81	27	A	gcC/gcA	rs2104506	NR	NR	none	NR	NR	none
1470	6	chr6:41558952	FOXP4	T	C	-	12/16	-	-	-	-	-	rs9471605	NR	NR	none	NR	NR	none
1471	6	chr6:41559050	FOXP4	T	C	13/17	-	1984	1526	509	A/V	gCc/gTc	-	NR	NR	none	NR	NR	none
1472	6	chr6:41565472	FOXP4	T	C	-	15/16	-	-	-	-	-	rs1887079	NR	NR	none	NR	NR	none
3884	19	chr19:3526945	FZR1	A	G	-	4/12	-	-	-	-	-	rs201406112	NR	NR	none	NR	NR	none
3885	19	chr19:3531825	FZR1	G	C	-	8/12	-	-	-	-	-	-	NR	NR	none	NR	NR	none
3886	19	chr19:3531832	FZR1	A	C	-	8/12	-	-	-	-	-	rs200515846	NR	NR	none	NR	NR	none
3887	19	chr19:3533265	FZR1	A	G	-	10/12	-	-	-	-	-	rs758471391	NR	NR	none	NR	NR	none
3888	19	chr19:3533274	FZR1	A	G	-	10/12	-	-	-	-	-	rs740681	NR	NR	none	NR	NR	none
3889	19	chr19:3534842	FZR1	A	G	-	-	-	-	-	-	-	rs10155	NR	NR	none	NR	NR	none
4253	23	chrX:153760508	G6PD	G	A	-	11/12	-	-	-	-	-	rs2071429	NR	NR	none	NR	NR	none
4254	23	chrX:153760654	G6PD	A	G	11/13	-	1785	1401	467	Y	taC/taT	rs2230037,CM133486	NR	NR	none	NR	NR	none
4255	23	chrX:153761219	G6PD	T	C	9/13	-	1463	1079	360	R/H	cGc/cAc	rs868950643	NR	NR	none	NR	NR	none
4256	23	chrX:153763492	G6PD	C	T	5/13	-	850	466	156	N/D	Aat/Gat	rs1050829,CM880030,COSM4985372,COSM4985373,COSM4985374	NR	NEUTRAL	none	NR	Variant of unknown origin	none
953	3	chr3:128200072	GATA2	T	C	6/6	-	1565	1233	411	A	gcG/gcA	rs34172218,COSM5019736	NR	NEUTRAL	none	NR	Confirmed somatic variant	Confirmed somatic variant
954	3	chr3:128202753	GATA2	A	G	4/6	-	1299	967	323	H/Y	Cac/Tac	COSM6854635	PATHOGENIC	NR	PATHOGENIC	Variant of unknown origin	NR	none
955	3	chr3:128202760	GATA2	C	G	4/6	-	1292	960	320	G	ggC/ggG	-	NR	NR	none	NR	NR	none
956	3	chr3:128204951	GATA2	T	C	3/6	-	822	490	164	A/T	Gcc/Acc	rs2335052,CM066570,COSM445531	PATHOGENIC	PATHOGENIC	PATHOGENIC	Confirmed somatic variant	Confirmed somatic variant	Confirmed somatic variant
957	3	chr3:128205686	GATA2	A	G	2/6	-	521	189	63	P	ccC/ccT	rs763735447	NR	NR	none	NR	NR	none
2563	10	chr10:8100599	GATA3	T	C	3/6	-	1141	573	191	P	ccC/ccT	rs35508267,COSM7319224	NR	NEUTRAL	none	NR	Confirmed somatic variant	Confirmed somatic variant
2564	10	chr10:8100647	GATA3	T	C	3/6	-	1189	621	207	A	gcC/gcT	rs2229359,COSM4144894	NR	NEUTRAL	none	NR	Confirmed somatic variant	Confirmed somatic variant
2565	10	chr10:8106135	GATA3	G	A	-	4/5	-	-	-	-	-	rs34909898	NR	NR	none	NR	NR	none
1247	5	chr5:37815849	GDNF	C	T	3/3	-	760	591	197	R	agA/agG	rs112417561	NR	NR	none	NR	NR	none
1248	5	chr5:37815960	GDNF	T	C	3/3	-	649	480	160	R	agG/agA	rs36010631,CM005544	NR	NR	none	NR	NR	none
3879	19	chr19:3110098	GNA11	A	G	-	1/6	-	-	-	-	-	rs7255425	NR	NR	none	NR	NR	none
3880	19	chr19:3110349	GNA11	G	T	-	2/6	-	-	-	-	-	rs11085000	NR	NR	none	NR	NR	none
3881	19	chr19:3110361	GNA11	T	C	-	2/6	-	-	-	-	-	rs41276846	NR	NR	none	NR	NR	none
3882	19	chr19:3113517	GNA11	-	GGCAGCTGCGGGCCG	-	3/6	-	-	-	-	-	rs145870964	NR	NR	none	NR	NR	none
3883	19	chr19:3114864	GNA11	T	C	-	3/6	-	-	-	-	-	rs3746069	NR	NR	none	NR	NR	none
4050	20	chr20:57415455	GNAS	T	C	-	4/4	-	-	-	-	-	rs1800902	NR	NR	none	NR	NR	none
4051	20	chr20:57415876	GNAS	A	C	-	4/4	-	-	-	-	-	rs79527543	NR	NR	none	NR	NR	none
4052	20	chr20:57428437	GNAS	G	C	1/13	-	669	117	39	P	ccC/ccG	-	NR	NR	none	NR	NR	none
4053	20	chr20:57474021	GNAS	A	G	3/13	-	2719	2167	723	A/T	Gca/Aca	COSM4385157,COSM4385158	NR	PATHOGENIC	PATHOGENIC	NR	Confirmed somatic variant	Confirmed somatic variant
4054	20	chr20:57478807	GNAS	C	T	5/13	-	2874	2322	774	I	atC/atT	rs7121,CM023931,COSM3758662	NEUTRAL	NEUTRAL	none	Confirmed somatic variant	Confirmed somatic variant	Confirmed somatic variant
4055	20	chr20:57478939	GNAS	A	G	-	5/12	-	-	-	-	-	rs3730168	NR	NR	none	NR	NR	none
4056	20	chr20:57480420	GNAS	C	T	-	5/12	-	-	-	-	-	rs3730170	NR	NR	none	NR	NR	none
4057	20	chr20:57484241	GNAS	T	C	7/13	-	3036	2484	828	I	atC/atT	rs8620,CD031054,CM124406	NR	NR	none	NR	NR	none
4058	20	chr20:57484421	GNAS	A	G	8/13	-	3083	2531	844	R/H	cGt/cAt	rs121913495,COSM27895,COSM308279,COSM94388,COSM99221	PATHOGENIC	PATHOGENIC	PATHOGENIC	Confirmed somatic variant	Confirmed somatic variant	Confirmed somatic variant
4059	20	chr20:57485812	GNAS	T	C	13/13	-	3594	3042	1014	N	aaC/aaT	rs8386,COSM5419940	NR	PATHOGENIC	PATHOGENIC	NR	Confirmed somatic variant	Confirmed somatic variant
2159	8	chr8:37686749	GPR124	G	A	-	3/18	-	-	-	-	-	rs6468442	NR	NR	none	NR	NR	none
2160	8	chr8:37688944	GPR124	A	G	8/19	-	949	936	312	E	gaG/gaA	rs147453371	NR	NR	none	NR	NR	none
2161	8	chr8:37688966	GPR124	A	G	8/19	-	971	958	320	V/M	Gtg/Atg	rs111714720	NR	NR	none	NR	NR	none
2162	8	chr8:37691418	GPR124	A	C	-	10/18	-	-	-	-	-	-	NR	NR	none	NR	NR	none
2163	8	chr8:37695228	GPR124	T	G	-	13/18	-	-	-	-	-	rs1462225686	NR	NR	none	NR	NR	none
2164	8	chr8:37695302	GPR124	C	T	14/19	-	2117	2104	702	W/R	Tgg/Cgg	rs375163748	NR	NR	none	NR	NR	none
489	2	chr2:11751005	GREB1	T	G	18/33	-	3158	2858	953	R/L	cGg/cTg	-	NR	NR	none	NR	NR	none
2039	7	chr7:126079144	GRM8	G	A	11/11	-	3565	-	-	-	-	rs712723	NR	NR	none	NR	NR	none
2040	7	chr7:126086270	GRM8	T	C	10/11	-	3396	2587	863	A/T	Gcc/Acc	rs1488933619	NR	NR	none	NR	NR	none
2041	7	chr7:126173626	GRM8	C	T	9/11	-	2619	1810	604	T/A	Acc/Gcc	rs868712292	NR	NR	none	NR	NR	none
2042	7	chr7:126173716	GRM8	C	T	9/11	-	2529	1720	574	I/V	Atc/Gtc	COSM94426	NR	PATHOGENIC	PATHOGENIC	NR	Confirmed somatic variant	Confirmed somatic variant
2043	7	chr7:126410171	GRM8	C	G	-	6/10	-	-	-	-	-	rs35648111	NR	NR	none	NR	NR	none
2044	7	chr7:126544242	GRM8	C	T	-	4/10	-	-	-	-	-	rs17685327	NR	NR	none	NR	NR	none
2045	7	chr7:126882902	GRM8	A	G	2/11	-	1166	357	119	F	ttC/ttT	rs769200	NR	NR	none	NR	NR	none
2802	11	chr11:106579204	GUCY1A2	A	C	-	8/8	-	-	-	-	-	rs12420232	NR	NR	none	NR	NR	none
2803	11	chr11:106579288	GUCY1A2	A	G	8/9	-	2424	2034	678	F	ttC/ttT	-	NR	NR	none	NR	NR	none
2804	11	chr11:106647138	GUCY1A2	CTCAAACT	-	-	6/8	-	-	-	-	-	rs139329770	NR	NR	none	NR	NR	none
2805	11	chr11:106849400	GUCY1A2	A	G	3/9	-	822	432	144	N	aaC/aaT	rs35760785	NR	NR	none	NR	NR	none
2987	12	chr12:123214166	HCAR1	A	G	1/2	-	964	721	241	L/F	Ctc/Ttc	rs140482291	NR	NR	none	NR	NR	none
2988	12	chr12:123214371	HCAR1	T	C	1/2	-	759	516	172	S	tcG/tcA	rs777756646	NR	NR	none	NR	NR	none
2989	12	chr12:123214372	HCAR1	A	G	1/2	-	758	515	172	S/L	tCg/tTg	rs61742326,CM1212153,COSM4146769	NR	NEUTRAL	none	NR	Reported in another cancer sample as somatic	none
3103	14	chr14:62162451	HIF1A	A	G	-	-	-	-	-	-	-	rs191035204	NR	NR	none	NR	NR	none
3104	14	chr14:62164608	HIF1A	-	T	1/15	-	269	40	14	F/X	Ttt/tt	rs140402206	NR	NR	none	NR	NR	none
3105	14	chr14:62187334	HIF1A	T	G	-	2/14	-	-	-	-	-	rs137993925	NR	NR	none	NR	NR	none
3106	14	chr14:62194239	HIF1A	A	G	6/15	-	940	711	237	K	aaG/aaA	rs17099141,COSM5019587	NR	PATHOGENIC	PATHOGENIC	NR	Confirmed somatic variant	Confirmed somatic variant
3107	14	chr14:62194368	HIF1A	C	T	6/15	-	1069	840	280	D	gaT/gaC	rs113805602	NR	NR	none	NR	NR	none
3108	14	chr14:62207327	HIF1A	T	G	11/15	-	1942	1713	571	K/N	aaG/aaT	COSM5832788,COSM956806	NR	PATHOGENIC	PATHOGENIC	NR	Confirmed somatic variant	Confirmed somatic variant
3109	14	chr14:62207557	HIF1A	T	C	12/15	-	2045	1816	606	P/S	Cca/Tca	rs11549465,CM035511,COSM5019750	NR	PATHOGENIC	PATHOGENIC	NR	Confirmed somatic variant	Confirmed somatic variant
3110	14	chr14:62213848	HIF1A	C	T	15/15	-	2827	-	-	-	-	rs2057482	NR	NR	none	NR	NR	none
3690	17	chr17:53342797	HLF	TTTC	-	1/4	-	424-425	-	-	-	-	rs10635027	NR	NR	none	NR	NR	none
2974	12	chr12:121416622	HNF1A	G	C	1/10	-	277	51	17	L	ctC/ctG	rs1169289,COSM430521	NEUTRAL	NEUTRAL	none	Confirmed somatic variant	Confirmed somatic variant	Confirmed somatic variant
2975	12	chr12:121416650	HNF1A	C	A	1/10	-	305	79	27	I/L	Atc/Ctc	rs1169288,CM001349,COSM430522	PATHOGENIC	PATHOGENIC	PATHOGENIC	Confirmed somatic variant	Confirmed somatic variant	Confirmed somatic variant
2976	12	chr12:121416864	HNF1A	T	C	1/10	-	519	293	98	A/V	gCc/gTc	rs1800574,CM971442,COSM1559371,COSM5020679	NR	PATHOGENIC	PATHOGENIC	NR	Variant of unknown origin	none
2977	12	chr12:121426901	HNF1A	C	G	-	2/9	-	-	-	-	-	rs12427353	NR	NR	none	NR	NR	none
2978	12	chr12:121431272	HNF1A	A	T	-	2/9	-	-	-	-	-	rs2071190,CS066655	NR	NR	none	NR	NR	none
2979	12	chr12:121431300	HNF1A	T	C	-	2/9	-	-	-	-	-	rs1169301	NR	NR	none	NR	NR	none
2980	12	chr12:121431559	HNF1A	A	G	-	3/9	-	-	-	-	-	rs748567045	NR	NR	none	NR	NR	none
2981	12	chr12:121432117	HNF1A	C	G	4/10	-	1090	864	288	G	ggG/ggC	rs56348580,CM067044,CX1310026,COSM1559372,COSM1684349,COSM1684350,COSM5019699	NR	PATHOGENIC	PATHOGENIC	NR	Variant of unknown origin	none
2982	12	chr12:121435342	HNF1A	T	C	7/10	-	1601	1375	459	L	Ctg/Ttg	rs2259820,COSM3931546	PATHOGENIC	PATHOGENIC	PATHOGENIC	Confirmed somatic variant	Confirmed somatic variant	Confirmed somatic variant
2983	12	chr12:121435427	HNF1A	A	G	7/10	-	1686	1460	487	S/N	aGc/aAc	rs2464196,CM067474,COSM4984989	PATHOGENIC	PATHOGENIC	PATHOGENIC	Confirmed somatic variant	Confirmed somatic variant	Confirmed somatic variant
2984	12	chr12:121435475	HNF1A	A	G	-	7/9	-	-	-	-	-	rs2464195	NR	NR	none	NR	NR	none
2985	12	chr12:121437114	HNF1A	A	G	8/10	-	1771	1545	515	T	acG/acA	rs55834942,COSM1559373,COSM1559374	NR	NEUTRAL	none	NR	Reported in another cancer sample as somatic	none
2986	12	chr12:121437221	HNF1A	C	T	-	8/9	-	-	-	-	-	rs1169304	NR	NR	none	NR	NR	none
2187	8	chr8:42761292	HOOK3	G	C	-	1/21	-	-	-	-	-	rs757422029	NR	NR	none	NR	NR	none
2188	8	chr8:42798658	HOOK3	G	A	-	5/21	-	-	-	-	-	rs1648120	NR	NR	none	NR	NR	none
2189	8	chr8:42868456	HOOK3	-	TTTTTT	-	20/21	-	-	-	-	-	-	NR	NR	none	NR	NR	none
2696	11	chr11:532635	HRAS	A	G	5/5	-	759	-	-	-	-	rs730880327	NR	NR	none	NR	NR	none
2697	11	chr11:533404	HRAS	T	C	-	4/4	-	-	-	-	-	rs568602129	NR	NR	none	NR	NR	none
2698	11	chr11:534197	HRAS	T	C	-	2/4	-	-	-	-	-	rs41258054	NR	NR	none	NR	NR	none
2699	11	chr11:534242	HRAS	G	A	2/5	-	269	81	27	H	caT/caC	rs12628,CM035804,COSM249860	NEUTRAL	NEUTRAL	none	Confirmed somatic variant	Confirmed somatic variant	Confirmed somatic variant
2700	11	chr11:534332	HRAS	A	G	2/5	-	179	-	-	-	-	rs41294870	NR	NR	none	NR	NR	none
3167	14	chr14:102548088	HSP90AA1	G	T	12/12	-	2808	2526	842	E/D	gaA/gaC	-	NR	NR	none	NR	NR	none
3168	14	chr14:102548224	HSP90AA1	C	T	-	11/11	-	-	-	-	-	rs2298877	NR	NR	none	NR	NR	none
3169	14	chr14:102548703	HSP90AA1	G	T	11/12	-	2482	2200	734	R	Aga/Cga	rs34644998	NR	NR	none	NR	NR	none
3170	14	chr14:102548797	HSP90AA1	C	G	-	10/11	-	-	-	-	-	-	NR	NR	none	NR	NR	none
3171	14	chr14:102550082	HSP90AA1	C	A	-	8/11	-	-	-	-	-	rs765681875	NR	NR	none	NR	NR	none
3172	14	chr14:102550803	HSP90AA1	A	G	7/12	-	1728	1446	482	N	aaC/aaT	rs4947	NR	NR	none	NR	NR	none
3173	14	chr14:102551324	HSP90AA1	C	T	6/12	-	1323	1041	347	E	gaA/gaG	rs147326221	NR	NR	none	NR	NR	none
3174	14	chr14:102551784	HSP90AA1	A	G	-	4/11	-	-	-	-	-	rs868552185	NR	NR	none	NR	NR	none
3175	14	chr14:102551788	HSP90AA1	G	A	-	4/11	-	-	-	-	-	rs4586364	NR	NR	none	NR	NR	none
3176	14	chr14:102552030	HSP90AA1	A	G	-	4/11	-	-	-	-	-	rs35241778	NR	NR	none	NR	NR	none
3177	14	chr14:102568296	HSP90AA1	A	G	2/12	-	564	282	94	T	acC/acT	rs10873531	NR	NR	none	NR	NR	none
3178	14	chr14:102568367	HSP90AA1	T	A	2/12	-	493	211	71	M/L	Atg/Ttg	rs8005905	NR	NR	none	NR	NR	none
1473	6	chr6:44217374	HSP90AB1	G	T	-	3/11	-	-	-	-	-	rs34083426	NR	NR	none	NR	NR	none
1474	6	chr6:44217749	HSP90AB1	T	C	-	4/11	-	-	-	-	-	rs34093450	NR	NR	none	NR	NR	none
1475	6	chr6:44217910	HSP90AB1	G	A	-	5/11	-	-	-	-	-	rs9369468	NR	NR	none	NR	NR	none
1476	6	chr6:44220076	HSP90AB1	C	T	-	10/11	-	-	-	-	-	rs504697	NR	NR	none	NR	NR	none
1477	6	chr6:44221142	HSP90AB1	T	C	-	11/11	-	-	-	-	-	rs34776515	NR	NR	none	NR	NR	none
1478	6	chr6:44221146	HSP90AB1	-	GAGTTTGT	-	11/11	-	-	-	-	-	rs148703092	NR	NR	none	NR	NR	none
1537	6	chr6:52878569	ICK	A	G	10/15	-	1533	1043	348	T/M	aCg/aTg	rs758321988,COSM1445188	NEUTRAL	NEUTRAL	none	Confirmed somatic variant	Confirmed somatic variant	Confirmed somatic variant
1538	6	chr6:52878637	ICK	C	T	10/15	-	1465	975	325	P	ccA/ccG	rs2297211	NR	NR	none	NR	NR	none
1539	6	chr6:52878654	ICK	T	C	10/15	-	1448	958	320	V/I	Gtc/Atc	rs33936662	NR	NR	none	NR	NR	none
1540	6	chr6:52880896	ICK	A	T	9/15	-	1306	816	272	R	cgA/cgT	rs868057037	NR	NR	none	NR	NR	none
1541	6	chr6:52881022	ICK	G	A	9/15	-	1180	690	230	L	ctT/ctC	rs113315648	NR	NR	none	NR	NR	none
1542	6	chr6:52883139	ICK	C	T	8/15	-	1142	652	218	T/A	Aca/Gca	rs759836069	NR	NR	none	NR	NR	none
692	2	chr2:209106667	IDH1	A	G	-	7/9	-	-	-	-	-	rs375976483	NR	NR	none	NR	NR	none
693	2	chr2:209106860	IDH1	T	C	7/10	-	1090	708	236	K	aaG/aaA	rs150747919,COSM6494782	NR	NEUTRAL	none	NR	Confirmed somatic variant	Confirmed somatic variant
694	2	chr2:209106875	IDH1	G	A	-	6/9	-	-	-	-	-	rs114459199	NR	NR	none	NR	NR	none
695	2	chr2:209108311	IDH1	C	T	6/10	-	920	538	180	M/V	Atg/Gtg	rs374474539,COSM4691739	PATHOGENIC	NR	PATHOGENIC	Confirmed somatic variant	NR	Confirmed somatic variant
696	2	chr2:209108317	IDH1	T	C	6/10	-	914	532	178	V/I	Gtt/Att	rs34218846,COSM97131	NR	PATHOGENIC	PATHOGENIC	NR	Reported in another cancer sample as somatic	none
697	2	chr2:209113192	IDH1	A	G	4/10	-	697	315	105	G	ggC/ggT	rs11554137,COSM1741220	NR	PATHOGENIC	PATHOGENIC	NR	Confirmed somatic variant	Confirmed somatic variant
698	2	chr2:209113388	IDH1	A	G	-	3/9	-	-	-	-	-	rs116548235	NR	NR	none	NR	NR	none
3286	15	chr15:90628243	IDH2	A	C	9/11	-	1282	1168	390	D/Y	Gac/Tac	-	NR	NR	none	NR	NR	none
3287	15	chr15:90628591	IDH2	A	G	8/11	-	1110	996	332	S	tcC/tcT	rs61737003,COSM4128570	NR	NEUTRAL	none	NR	Confirmed somatic variant	Confirmed somatic variant
3288	15	chr15:90634941	IDH2	G	A	-	1/10	-	-	-	-	-	rs10852126	NR	NR	none	NR	NR	none
3305	15	chr15:99250742	IGF1R	C	A	-	1/20	-	-	-	-	-	-	NR	NR	none	NR	NR	none
3306	15	chr15:99250839	IGF1R	A	G	2/21	-	754	143	48	R/H	cGc/cAc	rs774734018,COSM4444516	PATHOGENIC	NR	PATHOGENIC	Confirmed somatic variant	NR	Confirmed somatic variant
3307	15	chr15:99251356	IGF1R	T	C	-	2/20	-	-	-	-	-	rs7174918	NR	NR	none	NR	NR	none
3308	15	chr15:99434816	IGF1R	A	C	3/21	-	1514	903	301	G	ggC/ggA	rs2229764	NR	NR	none	NR	NR	none
3309	15	chr15:99442797	IGF1R	T	C	5/21	-	1805	1194	398	S	tcC/tcT	rs35315829	NR	NR	none	NR	NR	none
3310	15	chr15:99442820	IGF1R	A	G	5/21	-	1828	1217	406	R/H	cGc/cAc	rs148662051,CM110090,COSM6480110	NR	PATHOGENIC	PATHOGENIC	NR	Confirmed somatic variant	Confirmed somatic variant
3311	15	chr15:99454581	IGF1R	A	G	7/21	-	2111	1500	500	T	acG/acA	rs370500527,CM081310	NR	NR	none	NR	NR	none
3312	15	chr15:99456553	IGF1R	A	G	-	8/20	-	-	-	-	-	rs951715	NR	NR	none	NR	NR	none
3313	15	chr15:99460151	IGF1R	T	G	-	10/20	-	-	-	-	-	-	NR	NR	none	NR	NR	none
3314	15	chr15:99465473	IGF1R	T	C	11/21	-	2909	2298	766	T	acC/acT	rs3743262,CM105034	NR	NR	none	NR	NR	none
3315	15	chr15:99467189	IGF1R	G	A	12/21	-	3181	2570	857	N/S	aAt/aGt	rs45611935,CM110091	NR	NR	none	NR	NR	none
3316	15	chr15:99467934	IGF1R	C	A	-	13/20	-	-	-	-	-	rs1464430	NR	NR	none	NR	NR	none
3317	15	chr15:99467943	IGF1R	-	GT	-	13/20	-	-	-	-	-	rs3841650	NR	NR	none	NR	NR	none
3318	15	chr15:99467964	IGF1R	C	T	-	13/20	-	-	-	-	-	rs45610435	NR	NR	none	NR	NR	none
3319	15	chr15:99473606	IGF1R	G	A	-	15/20	-	-	-	-	-	rs33982004	NR	NR	none	NR	NR	none
3320	15	chr15:99478225	IGF1R	A	G	16/21	-	3740	3129	1043	E	gaG/gaA	rs2229765,CM031698	NR	NR	none	NR	NR	none
3321	15	chr15:99478713	IGF1R	C	T	-	17/20	-	-	-	-	-	rs2293117	NR	NR	none	NR	NR	none
3322	15	chr15:99486188	IGF1R	G	A	19/21	-	4105	3494	1165	Y/C	tAt/tGt	rs1167039747	NR	NR	none	NR	NR	none
3323	15	chr15:99500256	IGF1R	A	G	-	20/20	-	-	-	-	-	rs2593053	NR	NR	none	NR	NR	none
3324	15	chr15:99500605	IGF1R	T	C	21/21	-	4649	4038	1346	Y	taC/taT	rs17847203	NR	NR	none	NR	NR	none
2701	11	chr11:2154251	IGF2	-	C	5/5	-	1062	677	226	G/X	gGc/gc	COSM6955852,COSM6955853	null	null	none	Confirmed somatic variant	Confirmed somatic variant	Confirmed somatic variant
2702	11	chr11:2154252	IGF2	G	C	5/5	-	1061	676	226	G/R	Ggc/Cgc	COSM6936716,COSM6936717	NR	NEUTRAL	none	NR	Confirmed somatic variant	Confirmed somatic variant
1809	6	chr6:160412166	IGF2R	T	A	-	1/47	-	-	-	-	-	-	NR	NR	none	NR	NR	none
1810	6	chr6:160448324	IGF2R	G	C	6/48	-	902	754	252	L/V	Ctg/Gtg	rs8191754,CM105033	NR	NR	none	NR	NR	none
1811	6	chr6:160453561	IGF2R	G	T	-	7/47	-	-	-	-	-	rs4709390	NR	NR	none	NR	NR	none
1812	6	chr6:160453978	IGF2R	G	A	9/48	-	1198	1050	350	S	tcA/tcG	rs1570070	NR	NR	none	NR	NR	none
1813	6	chr6:160464209	IGF2R	A	G	12/48	-	1658	1510	504	G/S	Ggc/Agc	rs747686315	NR	NR	none	NR	NR	none
1814	6	chr6:160464289	IGF2R	A	G	12/48	-	1738	1590	530	G	ggG/ggA	rs894817	NR	NR	none	NR	NR	none
1815	6	chr6:160468278	IGF2R	G	A	16/48	-	2287	2139	713	T	acA/acG	rs998075	NR	NR	none	NR	NR	none
1816	6	chr6:160481571	IGF2R	T	C	-	22/47	-	-	-	-	-	rs764119319	NR	NR	none	NR	NR	none
1817	6	chr6:160482789	IGF2R	T	C	25/48	-	3559	3411	1137	S	agC/agT	rs139338831	NR	NR	none	NR	NR	none
1818	6	chr6:160485912	IGF2R	G	A	29/48	-	4242	4094	1365	D/G	gAt/gGt	rs146110381	NR	NR	none	NR	NR	none
1819	6	chr6:160491086	IGF2R	G	A	31/48	-	4587	4439	1480	Q/R	cAa/cGa	-	NR	NR	none	NR	NR	none
1820	6	chr6:160492947	IGF2R	T	C	32/48	-	4597	4449	1483	S	tcC/tcT	rs8191881	NR	NR	none	NR	NR	none
1821	6	chr6:160493913	IGF2R	A	G	33/48	-	4835	4687	1563	V/M	Gtg/Atg	rs745408671,COSM320937,COSM5975888	NR	PATHOGENIC	PATHOGENIC	NR	Variant of unknown origin	none
1822	6	chr6:160494409	IGF2R	A	G	34/48	-	5003	4855	1619	R/G	Agg/Ggg	rs629849	NR	NR	none	NR	NR	none
1823	6	chr6:160494521	IGF2R	T	C	-	34/47	-	-	-	-	-	rs2282140	NR	NR	none	NR	NR	none
1824	6	chr6:160499277	IGF2R	T	C	37/48	-	5509	5361	1787	F	ttC/ttT	rs1175824965,COSM7142824	NR	null	none	NR	Confirmed somatic variant	Confirmed somatic variant
1825	6	chr6:160505199	IGF2R	C	G	40/48	-	6199	6051	2017	L	ctC/ctG	rs614754	NR	NR	none	NR	NR	none
1826	6	chr6:160517598	IGF2R	T	C	45/48	-	6931	6783	2261	H	caC/caT	rs201644736,COSM3023588	null	null	none	Confirmed somatic variant	Confirmed somatic variant	Confirmed somatic variant
1827	6	chr6:160524773	IGF2R	A	T	-	46/47	-	-	-	-	-	rs2297370	NR	NR	none	NR	NR	none
2181	8	chr8:42129632	IKBKB	T	C	2/22	-	200	14	5	P/L	cCt/cTt	rs201805807	NR	NR	none	NR	NR	none
2182	8	chr8:42162675	IKBKB	T	C	-	5/21	-	-	-	-	-	rs17875700	NR	NR	none	NR	NR	none
2183	8	chr8:42174359	IKBKB	T	G	11/22	-	1248	1062	354	L	ctG/ctT	rs145086380	NR	NR	none	NR	NR	none
2184	8	chr8:42175297	IKBKB	C	T	-	12/21	-	-	-	-	-	-	NR	NR	none	NR	NR	none
2185	8	chr8:42175303	IKBKB	A	T	-	12/21	-	-	-	-	-	rs2294100	NR	NR	none	NR	NR	none
2186	8	chr8:42183529	IKBKB	A	G	20/22	-	2214	2028	676	M/I	atG/atA	rs78448523	NR	NR	none	NR	NR	none
426	1	chr1:206647652	IKBKE	T	A	-	3/21	-	-	-	-	-	-	NR	NR	none	NR	NR	none
427	1	chr1:206647742	IKBKE	G	A	4/22	-	529	156	52	Q	caA/caG	rs1539242	NR	NR	none	NR	NR	none
428	1	chr1:206647787	IKBKE	C	T	4/22	-	574	201	67	I	atT/atC	rs1539243	NR	NR	none	NR	NR	none
429	1	chr1:206648378	IKBKE	A	G	-	5/21	-	-	-	-	-	rs1059704	NR	NR	none	NR	NR	none
430	1	chr1:206649528	IKBKE	T	C	6/22	-	736	363	121	A	gcC/gcT	rs1136841	NR	NR	none	NR	NR	none
431	1	chr1:206649681	IKBKE	A	G	6/22	-	889	516	172	S	tcG/tcA	rs41296030,COSM1338274	NEUTRAL	NEUTRAL	none	Confirmed somatic variant	Confirmed somatic variant	Confirmed somatic variant
432	1	chr1:206650065	IKBKE	G	A	7/22	-	958	585	195	Q	caA/caG	rs41296034	NR	NR	none	NR	NR	none
433	1	chr1:206651107	IKBKE	A	G	8/22	-	1090	717	239	T	acG/acA	rs2297545	NR	NR	none	NR	NR	none
434	1	chr1:206652404	IKBKE	A	G	10/22	-	1484	1111	371	A/T	Gcc/Acc	rs17021877	NR	NR	none	NR	NR	none
435	1	chr1:206658428	IKBKE	A	C	-	14/21	-	-	-	-	-	rs139212098	NR	NR	none	NR	NR	none
436	1	chr1:206665052	IKBKE	T	C	18/22	-	2178	1805	602	A/V	gCg/gTg	rs12059562	NR	NR	none	NR	NR	none
437	1	chr1:206669465	IKBKE	T	C	22/22	-	2511	2138	713	P/L	cCt/cTt	rs3748022,CM136351	NR	NR	none	NR	NR	none
1883	7	chr7:50444387	IKZF1	A	G	4/7	-	516	317	106	G/E	gGa/gAa	rs549930725	NR	NR	none	NR	NR	none
1884	7	chr7:50450446	IKZF1	T	C	-	5/6	-	-	-	-	-	rs113962761	NR	NR	none	NR	NR	none
1885	7	chr7:50459405	IKZF1	A	G	-	5/6	-	-	-	-	-	rs78889803	NR	NR	none	NR	NR	none
1886	7	chr7:50467767	IKZF1	A	C	7/7	-	1075	876	292	P	ccC/ccA	rs61731355	NR	NR	none	NR	NR	none
1887	7	chr7:50468334	IKZF1	T	C	7/7	-	1642	-	-	-	-	rs72645704	NR	NR	none	NR	NR	none
3420	16	chr16:27441380	IL21R	T	C	2/9	-	461	-	-	-	-	rs557091943	NR	NR	none	NR	NR	none
3421	16	chr16:27455886	IL21R	G	A	6/9	-	1004	531	177	S	tcA/tcG	rs3093369	NR	NR	none	NR	NR	none
3422	16	chr16:27456613	IL21R	C	G	-	7/8	-	-	-	-	-	rs963154	NR	NR	none	NR	NR	none
1266	5	chr5:55237092	IL6ST	C	A	17/17	-	2888	2575	859	S/A	Tcc/Gcc	-	NR	NR	none	NR	NR	none
1267	5	chr5:55237596	IL6ST	A	C	17/17	-	2384	2071	691	V/L	Gta/Tta	-	NR	NR	none	NR	NR	none
1268	5	chr5:55247221	IL6ST	G	A	-	14/16	-	-	-	-	-	rs767954475	NR	NR	none	NR	NR	none
1269	5	chr5:55247262	IL6ST	-	GAAA	-	14/16	-	-	-	-	-	-	NR	NR	none	NR	NR	none
1270	5	chr5:55247869	IL6ST	-	T	13/17	-	1900	1587	529	K/X	aaA/aa	rs776023104,COSM269367	0	NR	none	Confirmed somatic variant	NR	Confirmed somatic variant
1271	5	chr5:55248135	IL6ST	T	C	12/17	-	1808	1495	499	V/I	Gta/Ata	rs34417936,COSM6049936	0	NR	none	Confirmed somatic variant	NR	Confirmed somatic variant
1272	5	chr5:55251931	IL6ST	C	G	10/17	-	1502	1189	397	L/V	Cta/Gta	rs2228043,COSM5019621	NR	NEUTRAL	none	NR	Confirmed somatic variant	Confirmed somatic variant
1273	5	chr5:55256341	IL6ST	T	C	8/17	-	1175	862	288	D/N	Gac/Aac	-	NR	NR	none	NR	NR	none
1274	5	chr5:55264142	IL6ST	C	T	5/17	-	766	453	151	E	gaA/gaG	rs2228045,COSM5020367	NR	NEUTRAL	none	NR	Confirmed somatic variant	Confirmed somatic variant
1275	5	chr5:55264153	IL6ST	G	C	5/17	-	755	442	148	G/R	Ggt/Cgt	rs2228044,COSM5019669	NR	NEUTRAL	none	NR	Confirmed somatic variant	Confirmed somatic variant
1276	5	chr5:55264223	IL6ST	T	C	5/17	-	685	372	124	L	ttG/ttA	rs200977907	NR	NR	none	NR	NR	none
1277	5	chr5:55264283	IL6ST	G	T	-	4/16	-	-	-	-	-	-	NR	NR	none	NR	NR	none
1278	5	chr5:55272085	IL6ST	C	G	3/17	-	335	22	8	L/V	Cta/Gta	rs1063560	NR	NR	none	NR	NR	none
1237	5	chr5:35857207	IL7R	T	C	-	1/7	-	-	-	-	-	rs1353251	NR	NR	none	NR	NR	none
1238	5	chr5:35861068	IL7R	C	T	2/8	-	326	197	66	I/T	aTc/aCc	rs1494558,CM1111762,COSM149813	NEUTRAL	NEUTRAL	none	Reported in another cancer sample as somatic	Confirmed somatic variant	Confirmed somatic variant
1239	5	chr5:35867469	IL7R	A	G	3/8	-	412	283	95	E/K	Gag/Aag	rs191585195,COSM5868434	NEUTRAL	NEUTRAL	none	Confirmed somatic variant	Confirmed somatic variant	Confirmed somatic variant
1240	5	chr5:35871190	IL7R	A	G	4/8	-	541	412	138	V/I	Gtc/Atc	rs1494555,CM088536,COSM149814	NEUTRAL	NEUTRAL	none	Reported in another cancer sample as somatic	Confirmed somatic variant	Confirmed somatic variant
1241	5	chr5:35871273	IL7R	T	C	4/8	-	624	495	165	H	caC/caT	rs2228141,COSM3761218	NEUTRAL	NEUTRAL	none	Confirmed somatic variant	Confirmed somatic variant	Confirmed somatic variant
1242	5	chr5:35873605	IL7R	A	G	5/8	-	690	561	187	K	aaG/aaA	rs11567764,COSM5020390	NR	NEUTRAL	none	NR	Confirmed somatic variant	Confirmed somatic variant
1243	5	chr5:35874575	IL7R	T	C	6/8	-	860	731	244	T/I	aCc/aTc	rs6897932,CM074279,COSM131837,COSM132904	NEUTRAL	NEUTRAL	none	Confirmed somatic variant	Confirmed somatic variant	Confirmed somatic variant
1244	5	chr5:35876274	IL7R	G	A	8/8	-	1195	1066	356	I/V	Atc/Gtc	rs3194051,CM058270,COSM5904807	NR	NEUTRAL	none	NR	Confirmed somatic variant	Confirmed somatic variant
1245	5	chr5:35876449	IL7R	T	C	8/8	-	1370	1241	414	T/M	aCg/aTg	rs2229232,COSM6966883	NR	NEUTRAL	none	NR	Confirmed somatic variant	Confirmed somatic variant
1246	5	chr5:35876546	IL7R	G	A	8/8	-	1467	1338	446	E	gaA/gaG	rs112890868	NR	NR	none	NR	NR	none
2867	12	chr12:6760367	ING4	T	C	8/8	-	783	744	248	K	aaG/aaA	rs76327967	NR	NR	none	NR	NR	none
2868	12	chr12:6762026	ING4	C	T	-	4/7	-	-	-	-	-	rs4764506	NR	NR	none	NR	NR	none
2869	12	chr12:6765989	ING4	T	C	-	1/7	-	-	-	-	-	rs117962564	NR	NR	none	NR	NR	none
1420	6	chr6:393317	IRF4	A	G	2/9	-	291	165	55	K	aaG/aaA	rs748194946	NR	NR	none	NR	NR	none
1421	6	chr6:395895	IRF4	A	C	4/9	-	578	452	151	P/H	cCc/cAc	COSM6967559	NR	PATHOGENIC	PATHOGENIC	NR	Confirmed somatic variant	Confirmed somatic variant
1422	6	chr6:397155	IRF4	T	C	5/9	-	666	540	180	D	gaC/gaT	-	NR	NR	none	NR	NR	none
1423	6	chr6:398965	IRF4	T	C	-	6/8	-	-	-	-	-	rs41301853	NR	NR	none	NR	NR	none
1424	6	chr6:399002	IRF4	C	T	-	6/8	-	-	-	-	-	rs76757590	NR	NR	none	NR	NR	none
3072	13	chr13:110408608	IRS2	C	T	2/2	-	4575	-	-	-	-	rs1865434	NR	NR	none	NR	NR	none
3073	13	chr13:110434840	IRS2	T	C	1/2	-	4076	3561	1187	E	gaG/gaA	-	NR	NR	none	NR	NR	none
3074	13	chr13:110435914	IRS2	A	G	1/2	-	3002	2487	829	P	ccC/ccT	rs12853546	NR	NR	none	NR	NR	none
3075	13	chr13:110435953	IRS2	G	A	1/2	-	2963	2448	816	C	tgT/tgC	rs4773092	NR	NR	none	NR	NR	none
278	1	chr1:145527604	ITGA10	G	A	-	1/29	-	-	-	-	-	rs2274620	NR	NR	none	NR	NR	none
279	1	chr1:145528319	ITGA10	T	G	4/30	-	515	340	114	E/*	Gag/Tag	-	NR	NR	none	NR	NR	none
280	1	chr1:145528348	ITGA10	A	G	-	4/29	-	-	-	-	-	-	NR	NR	none	NR	NR	none
281	1	chr1:145530254	ITGA10	T	C	-	5/29	-	-	-	-	-	rs74119688	NR	NR	none	NR	NR	none
282	1	chr1:145530939	ITGA10	T	C	7/30	-	846	671	224	T/M	aCg/aTg	-	NR	NR	none	NR	NR	none
283	1	chr1:145532549	ITGA10	T	C	9/30	-	1177	1002	334	F	ttT/ttC	rs1328584	NR	NR	none	NR	NR	none
284	1	chr1:145533175	ITGA10	C	T	11/30	-	1445	1270	424	L	Ttg/Ctg	rs11590105	NR	NR	none	NR	NR	none
285	1	chr1:145533580	ITGA10	A	G	-	12/29	-	-	-	-	-	rs200866220	NR	NR	none	NR	NR	none
286	1	chr1:145533894	ITGA10	-	C	13/30	-	1715	1540	514	P/X	Ccc/cc	-	NR	NR	none	NR	NR	none
287	1	chr1:145535814	ITGA10	T	C	16/30	-	2177	2002	668	R/W	Cgg/Tgg	rs36073645,COSM1168635	NR	NEUTRAL	none	NR	Variant of unknown origin	none
288	1	chr1:145535921	ITGA10	C	T	-	16/29	-	-	-	-	-	rs2274617	NR	NR	none	NR	NR	none
289	1	chr1:145536082	ITGA10	A	G	17/30	-	2349	2174	725	R/Q	cGg/cAg	rs2274616	NR	NR	none	NR	NR	none
290	1	chr1:145541460	ITGA10	T	C	28/30	-	3423	3248	1083	T/M	aCg/aTg	rs61741868	NR	NR	none	NR	NR	none
291	1	chr1:145542281	ITGA10	A	G	30/30	-	3682	-	-	-	-	rs2282014	NR	NR	none	NR	NR	none
835	3	chr3:37512646	ITGA9	CC	TG	-	2/27	-	-	-	-	-	rs71635841	NR	NR	none	NR	NR	none
836	3	chr3:37523079	ITGA9	A	G	4/28	-	781	525	175	T	acG/acA	rs17227748	NR	NR	none	NR	NR	none
837	3	chr3:37560842	ITGA9	G	A	11/28	-	1489	1233	411	S	tcA/tcG	rs61751646	NR	NR	none	NR	NR	none
838	3	chr3:37567515	ITGA9	C	A	-	12/27	-	-	-	-	-	-	NR	NR	none	NR	NR	none
839	3	chr3:37574951	ITGA9	A	G	14/28	-	1776	1520	507	G/E	gGa/gAa	rs267561	NR	NR	none	NR	NR	none
840	3	chr3:37584054	ITGA9	A	G	15/28	-	1923	1667	556	R/H	cGt/cAt	rs145528100,COSM1642236	NR	NEUTRAL	none	NR	Variant of unknown origin	none
841	3	chr3:37670876	ITGA9	C	G	-	16/27	-	-	-	-	-	rs2282485	NR	NR	none	NR	NR	none
842	3	chr3:37695192	ITGA9	A	G	-	16/27	-	-	-	-	-	rs3821909	NR	NR	none	NR	NR	none
843	3	chr3:37695260	ITGA9	G	A	17/28	-	2151	1895	632	Q/R	cAg/cGg	rs57547208	NR	NR	none	NR	NR	none
844	3	chr3:37774229	ITGA9	C	G	19/28	-	2350	2094	698	L	ctG/ctC	rs143192797	NR	NR	none	NR	NR	none
845	3	chr3:37778481	ITGA9	C	G	-	20/27	-	-	-	-	-	rs1118148	NR	NR	none	NR	NR	none
846	3	chr3:37783209	ITGA9	T	C	-	20/27	-	-	-	-	-	rs2000495	NR	NR	none	NR	NR	none
847	3	chr3:37783235	ITGA9	A	G	21/28	-	2505	2249	750	R/H	cGc/cAc	rs373225022	NR	NR	none	NR	NR	none
848	3	chr3:37791907	ITGA9	A	C	-	22/27	-	-	-	-	-	-	NR	NR	none	NR	NR	none
849	3	chr3:37818902	ITGA9	C	A	24/28	-	2817	2561	854	N/T	aAc/aCc	rs752702491	NR	NR	none	NR	NR	none
4070	21	chr21:46306786	ITGB2	A	G	16/17	-	2565	2112	704	I	atC/atT	rs760386808,COSM3842041	NR	NEUTRAL	none	NR	Confirmed somatic variant	Confirmed somatic variant
4071	21	chr21:46308664	ITGB2	A	G	15/17	-	2477	2024	675	T/M	aCg/aTg	rs778278328,COSM3785583	NR	NEUTRAL	none	NR	Confirmed somatic variant	Confirmed somatic variant
4072	21	chr21:46311813	ITGB2	G	A	12/17	-	1776	1323	441	V	gtT/gtC	rs235326	NR	NR	none	NR	NR	none
4073	21	chr21:46313442	ITGB2	T	G	11/17	-	1554	1101	367	V	gtC/gtA	rs2230529	NR	NR	none	NR	NR	none
4074	21	chr21:46314907	ITGB2	A	T	10/17	-	1515	1062	354	Q/H	caA/caT	rs235330	NR	NR	none	NR	NR	none
4075	21	chr21:46320304	ITGB2	A	G	8/17	-	1281	828	276	G	ggC/ggT	rs147150938,COSM1414459,COSM1559591	NEUTRAL	NEUTRAL	none	Confirmed somatic variant	Variant of unknown origin	Confirmed somatic variant
4076	21	chr21:46320313	ITGB2	T	C	8/17	-	1272	819	273	G	ggG/ggA	rs2230528	NR	NR	none	NR	NR	none
4077	21	chr21:46320382	ITGB2	A	G	8/17	-	1203	750	250	I	atC/atT	rs944565426,COSM3405469	NR	NEUTRAL	none	NR	Confirmed somatic variant	Confirmed somatic variant
4078	21	chr21:46320403	ITGB2	T	C	-	7/16	-	-	-	-	-	rs5030670	NR	NR	none	NR	NR	none
4079	21	chr21:46321659	ITGB2	A	C	-	6/16	-	-	-	-	-	rs55865320	NR	NR	none	NR	NR	none
4080	21	chr21:46321677	ITGB2	A	G	-	6/16	-	-	-	-	-	rs5030669	NR	NR	none	NR	NR	none
4081	21	chr21:46323273	ITGB2	A	G	-	6/16	-	-	-	-	-	rs17004715	NR	NR	none	NR	NR	none
4082	21	chr21:46326815	ITGB2	T	C	-	5/16	-	-	-	-	-	rs5030668	NR	NR	none	NR	NR	none
4083	21	chr21:46327067	ITGB2	A	-	-	4/16	-	-	-	-	-	-	NR	NR	none	NR	NR	none
4084	21	chr21:46330183	ITGB2	C	T	-	4/16	-	-	-	-	-	rs34580582	NR	NR	none	NR	NR	none
4085	21	chr21:46330628	ITGB2	T	C	-	3/16	-	-	-	-	-	rs2280965	NR	NR	none	NR	NR	none
4086	21	chr21:46330667	ITGB2	A	G	3/17	-	484	31	11	L	Ctg/Ttg	rs5030667	NR	NR	none	NR	NR	none
4087	21	chr21:46330674	ITGB2	A	C	3/17	-	477	24	8	L	ctG/ctT	rs11088969	NR	NR	none	NR	NR	none
3647	17	chr17:45331358	ITGB3	G	C	-	1/14	-	-	-	-	-	rs11871407	NR	NR	none	NR	NR	none
3648	17	chr17:45360680	ITGB3	T	C	-	2/14	-	-	-	-	-	rs988684	NR	NR	none	NR	NR	none
3649	17	chr17:45360730	ITGB3	C	T	3/15	-	192	176	59	L/P	cTg/cCg	rs5918,CM890078	NR	NR	none	NR	NR	none
3650	17	chr17:45360734	ITGB3	T	C	3/15	-	196	180	60	G	ggC/ggT	rs373101628	NR	NR	none	NR	NR	none
3651	17	chr17:45360865	ITGB3	A	C	3/15	-	327	311	104	S/Y	tCc/tAc	-	NR	NR	none	NR	NR	none
3652	17	chr17:45361773	ITGB3	T	G	-	3/14	-	-	-	-	-	-	NR	NR	none	NR	NR	none
3653	17	chr17:45361974	ITGB3	A	G	4/15	-	543	527	176	R/Q	cGg/cAg	rs1444020101	NR	NR	none	NR	NR	none
3654	17	chr17:45363546	ITGB3	T	G	-	4/14	-	-	-	-	-	rs35265764	NR	NR	none	NR	NR	none
3655	17	chr17:45364540	ITGB3	C	T	6/15	-	898	882	294	P	ccT/ccC	rs5919	NR	NR	none	NR	NR	none
3656	17	chr17:45367167	ITGB3	A	G	-	7/14	-	-	-	-	-	rs770724365	NR	NR	none	NR	NR	none
3657	17	chr17:45368248	ITGB3	A	G	-	8/14	-	-	-	-	-	rs41315064	NR	NR	none	NR	NR	none
3658	17	chr17:45368337	ITGB3	C	A	9/15	-	1159	1143	381	V	gtA/gtC	rs15908	NR	NR	none	NR	NR	none
3659	17	chr17:45369777	ITGB3	G	A	10/15	-	1549	1533	511	E	gaA/gaG	rs4642	NR	NR	none	NR	NR	none
3660	17	chr17:45369789	ITGB3	A	G	10/15	-	1561	1545	515	R	cgG/cgA	rs4634	NR	NR	none	NR	NR	none
3661	17	chr17:45377825	ITGB3	C	T	-	11/14	-	-	-	-	-	rs11870252	NR	NR	none	NR	NR	none
3662	17	chr17:45377857	ITGB3	C	T	12/15	-	1943	1927	643	C/R	Tgt/Cgt	-	NR	NR	none	NR	NR	none
3663	17	chr17:45377881	ITGB3	A	C	12/15	-	1967	1951	651	L/I	Cta/Ata	-	NR	NR	none	NR	NR	none
3664	17	chr17:45380002	ITGB3	C	T	-	12/14	-	-	-	-	-	rs3760372	NR	NR	none	NR	NR	none
3665	17	chr17:45385012	ITGB3	T	C	-	14/14	-	-	-	-	-	rs3809863	NR	NR	none	NR	NR	none
100	1	chr1:65303659	JAK1	T	C	22/25	-	3345	3096	1032	K	aaG/aaA	rs12129819,COSM5020680	NR	PATHOGENIC	PATHOGENIC	NR	Confirmed somatic variant	Confirmed somatic variant
101	1	chr1:65306948	JAK1	G	T	19/25	-	2878	2629	877	R	Agg/Cgg	rs565648053	NR	NR	none	NR	NR	none
102	1	chr1:65310489	JAK1	C	T	16/25	-	2448	2199	733	P	ccA/ccG	rs2230588,COSM3751351	NEUTRAL	NEUTRAL	none	Confirmed somatic variant	Confirmed somatic variant	Confirmed somatic variant
103	1	chr1:65311214	JAK1	C	G	15/25	-	2346	2097	699	A	gcC/gcG	rs3737139,COSM5019856	NR	PATHOGENIC	PATHOGENIC	NR	Confirmed somatic variant	Confirmed somatic variant
104	1	chr1:65311262	JAK1	A	G	15/25	-	2298	2049	683	S	agC/agT	rs2230587,COSM3751352	NEUTRAL	NEUTRAL	none	Confirmed somatic variant	Confirmed somatic variant	Confirmed somatic variant
105	1	chr1:65321250	JAK1	A	G	11/25	-	1839	1590	530	I	atC/atT	rs2230586,COSM5019852	NR	PATHOGENIC	PATHOGENIC	NR	Confirmed somatic variant	Confirmed somatic variant
106	1	chr1:65325970	JAK1	T	C	-	8/24	-	-	-	-	-	rs310224	NR	NR	none	NR	NR	none
107	1	chr1:65325971	JAK1	A	G	-	8/24	-	-	-	-	-	rs757622356	NR	NR	none	NR	NR	none
108	1	chr1:65335062	JAK1	G	A	6/25	-	828	579	193	A	gcT/gcC	rs45598436,COSM5020688	NR	NEUTRAL	none	NR	Confirmed somatic variant	Confirmed somatic variant
109	1	chr1:65335095	JAK1	C	T	6/25	-	795	546	182	G	ggA/ggG	rs11585932,COSM5019905	NR	NEUTRAL	none	NR	Confirmed somatic variant	Confirmed somatic variant
110	1	chr1:65349133	JAK1	C	T	3/25	-	281	32	11	N/S	aAt/aGt	rs1167926810	NR	NR	none	NR	NR	none
2364	9	chr9:5050706	JAK2	T	C	6/25	-	983	489	163	H	caC/caT	rs2230722,COSM4432269	NR	NEUTRAL	none	NR	Confirmed somatic variant	Confirmed somatic variant
2365	9	chr9:5069023	JAK2	A	G	11/25	-	1822	1328	443	R/Q	cGa/cAa	rs753648225	NR	NR	none	NR	NR	none
2366	9	chr9:5069901	JAK2	C	T	-	11/24	-	-	-	-	-	rs201380361	NR	NR	none	NR	NR	none
2367	9	chr9:5077517	JAK2	C	T	15/25	-	2423	1929	643	N	aaT/aaC	rs2230728,COSM6495315	NR	NR	none	NR	NR	none
2368	9	chr9:5081778	JAK2	TA	CT	19/25	-	2982-2983	2488-2489	830	L/*	CTg/TAg	-	NR	NR	none	NR	NR	none
2369	9	chr9:5081780	JAK2	A	G	19/25	-	2984	2490	830	L	ctG/ctA	rs2230724,COSM3763953,COSM7244711	NEUTRAL	NEUTRAL	none	Confirmed somatic variant	Confirmed somatic variant	Confirmed somatic variant
2370	9	chr9:5090443	JAK2	G	A	-	20/24	-	-	-	-	-	-	NR	NR	none	NR	NR	none
2371	9	chr9:5090641	JAK2	A	G	-	21/24	-	-	-	-	-	rs10974955	NR	NR	none	NR	NR	none
3923	19	chr19:17937479	JAK3	G	A	24/24	-	3548	-	-	-	-	rs149873298	NR	NR	none	NR	NR	none
3924	19	chr19:17937516	JAK3	T	C	24/24	-	3511	-	-	-	-	rs3212799	NR	NR	none	NR	NR	none
3925	19	chr19:17937659	JAK3	T	C	24/24	-	3368	3268	1090	A/T	Gcc/Acc	rs144968714,COSM1589889,COSM48454,COSM992912	NR	NEUTRAL	none	NR	Reported in another cancer sample as somatic	none
3926	19	chr19:17937758	JAK3	T	C	-	23/23	-	-	-	-	-	rs3212798	NR	NR	none	NR	NR	none
3927	19	chr19:17941254	JAK3	C	T	-	22/23	-	-	-	-	-	rs2302602	NR	NR	none	NR	NR	none
3928	19	chr19:17941294	JAK3	C	T	-	22/23	-	-	-	-	-	rs2302603	NR	NR	none	NR	NR	none
3929	19	chr19:17942556	JAK3	T	C	20/24	-	2832	2732	911	R/H	cGc/cAc	rs983583356	NR	NR	none	NR	NR	none
3930	19	chr19:17943276	JAK3	G	A	-	19/23	-	-	-	-	-	rs138631124	NR	NR	none	NR	NR	none
3931	19	chr19:17943383	JAK3	A	G	19/24	-	2725	2625	875	L	ctC/ctT	rs2230589,COSM5019096	NR	NR	none	NR	NR	none
3932	19	chr19:17943559	JAK3	A	C	-	18/23	-	-	-	-	-	rs147387570	NR	NR	none	NR	NR	none
3933	19	chr19:17945471	JAK3	A	G	17/24	-	2359	2259	753	A	gcC/gcT	rs35458530,COSM3773848	NR	NR	none	NR	NR	none
3934	19	chr19:17952185	JAK3	T	G	-	8/23	-	-	-	-	-	rs3212733	NR	NR	none	NR	NR	none
3935	19	chr19:17955119	JAK3	G	C	2/24	-	208	108	36	G	ggG/ggC	rs149701114,CD040903	NR	NR	none	NR	NR	none
99	1	chr1:59247993	JUN	T	C	1/1	-	1793	750	250	Q	caG/caA	rs11688	NR	NR	none	NR	NR	none
2170	8	chr8:41790866	KAT6A	C	G	18/18	-	5416	4872	1624	V	gtC/gtG	rs2980901	NR	NR	none	NR	NR	none
2171	8	chr8:41791041	KAT6A	A	-	18/18	-	5241-5242	4697-4698	1566	P/PX	cca/ccTa	-	NR	NR	none	NR	NR	none
2172	8	chr8:41791283	KAT6A	A	G	18/18	-	4999	4455	1485	S	tcC/tcT	rs3739365	NR	NR	none	NR	NR	none
2173	8	chr8:41794934	KAT6A	T	C	17/18	-	3736	3192	1064	T	acG/acA	rs13748	NR	NR	none	NR	NR	none
2174	8	chr8:41798330	KAT6A	A	G	-	16/17	-	-	-	-	-	rs72640388	NR	NR	none	NR	NR	none
2175	8	chr8:41798417	KAT6A	T	C	16/18	-	3526	2982	994	P	ccG/ccA	rs3824275	NR	NR	none	NR	NR	none
2176	8	chr8:41805249	KAT6A	T	C	-	12/17	-	-	-	-	-	rs10504048	NR	NR	none	NR	NR	none
2177	8	chr8:41834732	KAT6A	T	C	8/18	-	1701	1157	386	R/Q	cGg/cAg	rs140780968	NR	NR	none	NR	NR	none
2178	8	chr8:41906095	KAT6A	G	A	3/18	-	945	401	134	L/S	tTa/tCa	rs3824276	NR	NR	none	NR	NR	none
2179	8	chr8:41906102	KAT6A	G	A	3/18	-	938	394	132	S/P	Tct/Cct	rs188417057	NR	NR	none	NR	NR	none
2180	8	chr8:41906512	KAT6A	C	T	3/18	-	528	-	-	-	-	rs141360124	NR	NR	none	NR	NR	none
2615	10	chr10:76735416	KAT6B	-	T	2020-08-18	-	1810	1321	441	F/X	Ttt/tt	-	NR	NR	none	NR	NR	none
2616	10	chr10:76735441	KAT6B	A	G	8/18	-	1835	1346	449	R/H	cGc/cAc	rs768502700	NR	NR	none	NR	NR	none
2617	10	chr10:76736004	KAT6B	C	T	8/18	-	2398	1909	637	Y/H	Tat/Cat	-	NR	NR	none	NR	NR	none
2618	10	chr10:76744954	KAT6B	-	A	12/18	-	2979	2490	830	T/X	acA/ac	-	NR	NR	none	NR	NR	none
2619	10	chr10:76744958	KAT6B	T	A	12/18	-	2983	2494	832	N/Y	Aat/Tat	-	NR	NR	none	NR	NR	none
2620	10	chr10:76744965	KAT6B	G	A	12/18	-	2990	2501	834	E/G	gAa/gGa	-	NR	NR	none	NR	NR	none
2621	10	chr10:76781872	KAT6B	G	A	16/18	-	3744	3255	1085	E	gaA/gaG	rs933289359	NR	NR	none	NR	NR	none
2622	10	chr10:76781875	KAT6B	C	A	16/18	-	3747	3258	1086	E/D	gaA/gaC	rs754680177,COSM1349125	NEUTRAL	NEUTRAL	none	Confirmed somatic variant	Confirmed somatic variant	Confirmed somatic variant
2623	10	chr10:76781881	KAT6B	G	A	16/18	-	3753	3264	1088	E	gaA/gaG	rs551589427	NR	NR	none	NR	NR	none
2624	10	chr10:76781906	KAT6B	-	GAA	16/18	-	3778-3780	3289-3291	1097	E/-	GAA/-	rs71929101,COSM111693	NR	NR	none	NR	NR	none
2625	10	chr10:76784992	KAT6B	T	G	17/18	-	4138	3649	1217	A/S	Gct/Tct	rs57372986	NR	NR	none	NR	NR	none
2626	10	chr10:76788618	KAT6B	T	G	18/18	-	4525	4036	1346	D/Y	Gat/Tat	rs542036896	NR	NR	none	NR	NR	none
2627	10	chr10:76788645	KAT6B	-	GAGGAG	18/18	-	4552-4557	4063-4068	1355-1356	EE/-	GAGGAG/-	rs748773626,TMP_ESP_10_76788645_76788650	NR	NR	none	NR	NR	none
2628	10	chr10:76788690	KAT6B	GAA	-	18/18	-	4596-4597	4107-4108	1369-1370	-/E	-/GAA	rs757120352	NR	NR	none	NR	NR	none
2629	10	chr10:76788860	KAT6B	T	C	18/18	-	4767	4278	1426	A	gcC/gcT	rs3740322	NR	NR	none	NR	NR	none
2630	10	chr10:76789077	KAT6B	A	G	18/18	-	4984	4495	1499	V/I	Gta/Ata	rs3740321	NR	NR	none	NR	NR	none
4214	23	chrX:53245059	KDM5C	T	C	7/26	-	1414	881	294	S/N	aGc/aAc	-	NR	NR	none	NR	NR	none
4215	23	chrX:53246334	KDM5C	T	C	5/26	-	1181	648	216	L	ctG/ctA	rs782355957	NR	NR	none	NR	NR	none
4198	23	chrX:44833841	KDM6A	A	C	-	3/28	-	-	-	-	-	rs6611055	NR	NR	none	NR	NR	none
4199	23	chrX:44913052	KDM6A	A	T	-	9/28	-	-	-	-	-	rs5952285	NR	NR	none	NR	NR	none
4200	23	chrX:44922880	KDM6A	G	A	16/29	-	1782	1741	581	T/A	Aca/Gca	rs34922269	NR	NR	none	NR	NR	none
4201	23	chrX:44922982	KDM6A	G	C	16/29	-	1884	1843	615	L/V	Ctc/Gtc	rs112725812	NR	NR	none	NR	NR	none
4202	23	chrX:44929077	KDM6A	A	C	17/29	-	2218	2177	726	T/K	aCg/aAg	rs2230018,COSM3759496	NR	NR	none	NR	NR	none
4203	23	chrX:44938557	KDM6A	C	T	20/29	-	3146	3105	1035	Y	taT/taC	rs867558265	NR	NR	none	NR	NR	none
4204	23	chrX:44938563	KDM6A	A	G	20/29	-	3152	3111	1037	Q	caG/caA	rs20539,COSM1179848,COSM5019441,COSM5019442	NR	PATHOGENIC	PATHOGENIC	NR	Confirmed somatic variant	Confirmed somatic variant
4205	23	chrX:44942869	KDM6A	C	T	-	23/28	-	-	-	-	-	-	NR	NR	none	NR	NR	none
4206	23	chrX:44966795	KDM6A	C	T	-	27/28	-	-	-	-	-	rs5952682	NR	NR	none	NR	NR	none
4207	23	chrX:44969370	KDM6A	A	G	28/29	-	4093	4052	1351	R/Q	cGa/cAa	rs370765411,COSM6952413,COSM6952414,COSM6952415	PATHOGENIC	PATHOGENIC	PATHOGENIC	Confirmed somatic variant	Reported in another cancer sample as somatic	Confirmed somatic variant			Central nervous system
4208	23	chrX:44970644	KDM6A	T	C	29/29	-	4235	4194	1398	S	tcC/tcT	rs150722375,COSM5367064,COSM5367065,COSM5367066	PATHOGENIC	NR	PATHOGENIC	Confirmed somatic variant	NR	Confirmed somatic variant
1121	4	chr4:55948108	KDR	G	A	-	29/29	-	-	-	-	-	rs2412617	NR	NR	none	NR	NR	none
1122	4	chr4:55953747	KDR	-	CG	-	27/29	-	-	-	-	-	-	NR	NR	none	NR	NR	none
1123	4	chr4:55960993	KDR	A	G	21/30	-	3243	2947	983	L/F	Ctc/Ttc	COSM6927305	NR	PATHOGENIC	PATHOGENIC	NR	Confirmed somatic variant	Confirmed somatic variant
1124	4	chr4:55962358	KDR	C	T	-	19/29	-	-	-	-	-	rs10517340	NR	NR	none	NR	NR	none
1125	4	chr4:55965032	KDR	-	T	-	15/29	-	-	-	-	-	rs201785245	NR	NR	none	NR	NR	none
1126	4	chr4:55970908	KDR	G	T	13/30	-	2185	1889	630	K/T	aAg/aCg	-	NR	NR	none	NR	NR	none
1127	4	chr4:55972974	KDR	A	T	11/30	-	1712	1416	472	Q/H	caA/caT	rs1870377,CM074306,COSM149673	NEUTRAL	NEUTRAL	none	Confirmed somatic variant	Confirmed somatic variant	Confirmed somatic variant
1128	4	chr4:55979558	KDR	T	C	7/30	-	1185	889	297	V/I	Gta/Ata	rs2305948,CM074307,COSM1131107	PATHOGENIC	PATHOGENIC	PATHOGENIC	Reported in another cancer sample as somatic	Confirmed somatic variant	Confirmed somatic variant
1129	4	chr4:55980239	KDR	T	C	-	6/29	-	-	-	-	-	rs7692791	NR	NR	none	NR	NR	none
1130	4	chr4:55980293	KDR	A	C	6/30	-	1094	798	266	K/N	aaG/aaT	-	NR	NR	none	NR	NR	none
1131	4	chr4:55981509	KDR	T	-	4/30	-	724-725	428-429	143	N/KX	aac/aaAc	-	NR	NR	none	NR	NR	none
1132	4	chr4:55991409	KDR	A	G	1/30	-	348	52	18	R/W	Cgg/Tgg	rs1216864286,COSM4965143	NR	NEUTRAL	none	NR	Confirmed somatic variant	Confirmed somatic variant
1133	4	chr4:55991461	KDR	A	C	1/30	-	296	-	-	-	-	rs56233104	NR	NR	none	NR	NR	none
3896	19	chr19:10597513	KEAP1	A	G	-	5/5	-	-	-	-	-	rs199564276	NR	NR	none	NR	NR	none
3897	19	chr19:10599836	KEAP1	C	G	-	5/5	-	-	-	-	-	rs11878494	NR	NR	none	NR	NR	none
3898	19	chr19:10599970	KEAP1	A	G	5/6	-	2154	1606	536	R/C	Cgc/Tgc	rs749651891	NR	NR	none	NR	NR	none
3899	19	chr19:10600418	KEAP1	A	G	4/6	-	1985	1437	479	D	gaC/gaT	rs35074907,COSM5020974	NR	NEUTRAL	none	NR	Confirmed somatic variant	Confirmed somatic variant
3900	19	chr19:10600442	KEAP1	C	G	4/6	-	1961	1413	471	L	ctC/ctG	rs1048290,COSM148507,COSM5609242	NEUTRAL	NEUTRAL	none	Confirmed somatic variant	Confirmed somatic variant	Confirmed somatic variant
3901	19	chr19:10600522	KEAP1	A	G	4/6	-	1881	1333	445	P/S	Cca/Tca	-	NR	NR	none	NR	NR	none
3902	19	chr19:10610236	KEAP1	G	A	2/6	-	1022	474	158	G	ggT/ggC	rs1048287,COSM4131169	NR	NEUTRAL	none	NR	Confirmed somatic variant	Confirmed somatic variant
3903	19	chr19:10610620	KEAP1	T	C	2/6	-	638	90	30	A	gcG/gcA	rs80113737	NR	NR	none	NR	NR	none
1109	4	chr4:55565730	KIT	G	A	-	3/20	-	-	-	-	-	rs17084647	NR	NR	none	NR	NR	none
1110	4	chr4:55575593	KIT	T	C	7/21	-	1216	1119	373	Y	taC/taT	rs72549293,COSM6005552	NR	NEUTRAL	none	NR	Confirmed somatic variant	Confirmed somatic variant
1111	4	chr4:55575668	KIT	T	C	7/21	-	1291	1194	398	D	gaC/gaT	rs376940990	NR	NR	none	NR	NR	none
1112	4	chr4:55593464	KIT	C	A	10/21	-	1718	1621	541	M/L	Atg/Ctg	rs3822214,CM078686,CM088364,COSM28026	PATHOGENIC	PATHOGENIC	PATHOGENIC	Reported in another cancer sample as somatic	Reported in another cancer sample as somatic	none			Lung, Breast and Bone
1113	4	chr4:55593481	KIT	G	A	10/21	-	1735	1638	546	K	aaA/aaG	rs55986963,COSM21983	NR	PATHOGENIC	PATHOGENIC	NR	Reported in another cancer sample as somatic	none
1114	4	chr4:55595672	KIT	-	TAGT	-	14/20	-	-	-	-	-	rs747770197	NR	NR	none	NR	NR	none
1115	4	chr4:55597987	KIT	T	C	-	15/20	-	-	-	-	-	rs72549295	NR	NR	none	NR	NR	none
1116	4	chr4:55599268	KIT	T	C	17/21	-	2491	2394	798	I	atC/atT	rs55789615,COSM1307	PATHOGENIC	PATHOGENIC	PATHOGENIC	Confirmed somatic variant	Reported in another cancer sample as somatic	Confirmed somatic variant			Haematopoietic and lymphoid, soft tissue,Bone and Testis
1117	4	chr4:55599436	KIT	C	T	-	17/20	-	-	-	-	-	rs1008658	NR	NR	none	NR	NR	none
1118	4	chr4:55602724	KIT	T	G	18/21	-	2642	2545	849	E/*	Gaa/Taa	COSM133781	NR	PATHOGENIC	PATHOGENIC	NR	Variant of unknown origin	none
1119	4	chr4:55602765	KIT	C	G	18/21	-	2683	2586	862	L	ctG/ctC	rs3733542,CM058344,COSM1325	NEUTRAL	NEUTRAL	none	Confirmed somatic variant	Reported in another cancer sample as somatic	Confirmed somatic variant
1120	4	chr4:55604639	KIT	T	C	21/21	-	2944	2847	949	P	ccC/ccT	rs56288823,COSM6494998	NR	NR	none	NR	NR	none
2561	10	chr10:3824270	KLF6	C	T	2/4	-	500	239	80	K/R	aAg/aGg	-	NR	NR	none	NR	NR	none
2562	10	chr10:3827210	KLF6	T	G	1/4	-	258	-	-	-	-	rs11544694	NR	NR	none	NR	NR	none
2874	12	chr12:25362777	KRAS	G	A	6/6	-	707	-	-	-	-	rs1137282,COSM3753105	PATHOGENIC	PATHOGENIC	PATHOGENIC	Confirmed somatic variant	Confirmed somatic variant	Confirmed somatic variant
2875	12	chr12:25362854	KRAS	T	C	-	5/5	-	-	-	-	-	rs12313763,COSM5020454	0	NR	none	Reported in another cancer sample as somatic	NR	none
2876	12	chr12:25368455	KRAS	A	G	5/6	-	554	490	164	R/*	Cga/Tga	rs200186819	NR	NR	none	NR	NR	none
2877	12	chr12:25368462	KRAS	C	T	5/6	-	547	483	161	R	agG/agA	rs4362222	NR	NR	none	NR	NR	none
2878	12	chr12:25380260	KRAS	C	T	3/6	-	262	198	66	A	gcA/gcG	rs200229810	NR	NR	none	NR	NR	none
2879	12	chr12:25398279	KRAS	CGC	-	2/6	-	104-105	40-41	14	V/GV	gta/gGCGta	-	NR	NR	none	NR	NR	none
2880	12	chr12:25398284	KRAS	T	C	2020-02-06	-	99	35	12	G/D	gGt/gAt	rs121913529,COSM1135366,COSM1140133,COSM1140134,COSM12657,COSM49168,COSM520,COSM521,COSM522	NR	NR	none	NR	NR	none
3076	13	chr13:113960884	LAMP1	T	C	2/9	-	340	146	49	A/V	gCc/gTc	rs752992439	NR	NR	none	NR	NR	none
3077	13	chr13:113965176	LAMP1	A	C	4/9	-	750	556	186	R	Cgg/Agg	rs9577503	NR	NR	none	NR	NR	none
3078	13	chr13:113974717	LAMP1	A	G	6/9	-	1002	808	270	G/S	Ggc/Agc	rs764500535	NR	NR	none	NR	NR	none
3079	13	chr13:113975948	LAMP1	A	G	8/9	-	1214	1020	340	A	gcG/gcA	rs372087869	NR	NR	none	NR	NR	none
72	1	chr1:32751169	LCK	A	G	13/13	-	1520	1382	461	R/H	cGc/cAc	rs763148386	NR	NR	none	NR	NR	none
1249	5	chr5:38481879	LIFR	G	T	20/20	-	3275	3112	1038	N/H	Aat/Cat	-	NR	NR	none	NR	NR	none
1250	5	chr5:38482324	LIFR	T	G	-	19/19	-	-	-	-	-	-	NR	NR	none	NR	NR	none
1251	5	chr5:38486065	LIFR	T	C	17/20	-	2516	2353	785	V/I	Gtt/Att	rs3110234,COSM4697935,COSM4697936	0	NR	none	Confirmed somatic variant	NR	Confirmed somatic variant
1252	5	chr5:38486091	LIFR	T	A	-	16/19	-	-	-	-	-	-	NR	NR	none	NR	NR	none
1253	5	chr5:38489330	LIFR	C	T	16/20	-	2348	2185	729	N/D	Aat/Gat	rs771179732,COSM5515048,COSM5515049	NR	PATHOGENIC	PATHOGENIC	NR	Confirmed somatic variant	Confirmed somatic variant
1254	5	chr5:38490271	LIFR	G	A	-	15/19	-	-	-	-	-	rs3110971	NR	NR	none	NR	NR	none
1255	5	chr5:38496637	LIFR	T	C	13/20	-	1895	1732	578	D/N	Gat/Aat	rs3729740,COSM162154,COSM4809828	NR	NEUTRAL	none	NR	Confirmed somatic variant	Confirmed somatic variant
1256	5	chr5:38499715	LIFR	A	G	-	11/19	-	-	-	-	-	-	NR	NR	none	NR	NR	none
1257	5	chr5:38499764	LIFR	A	G	-	11/19	-	-	-	-	-	rs3729737	NR	NR	none	NR	NR	none
1258	5	chr5:38502822	LIFR	C	G	11/20	-	1680	1517	506	T/S	aCt/aGt	-	NR	NR	none	NR	NR	none
1259	5	chr5:38504303	LIFR	T	A	-	9/19	-	-	-	-	-	rs16903989	NR	NR	none	NR	NR	none
1260	5	chr5:38527228	LIFR	G	T	-	4/19	-	-	-	-	-	rs2289779	NR	NR	none	NR	NR	none
1261	5	chr5:38527308	LIFR	A	G	4/20	-	509	346	116	H/Y	Cat/Tat	rs3729734	NR	NR	none	NR	NR	none
1262	5	chr5:38528952	LIFR	-	AC	-	2020-02-19	-	-	-	-	-	rs34759137	NR	NR	none	NR	NR	none
1263	5	chr5:38528966	LIFR	-	ACACACACACACACAG	-	2/19	-	-	-	-	-	rs752757847	NR	NR	none	NR	NR	none
1264	5	chr5:38528968	LIFR	-	ACACACACACACAG	-	2/19	-	-	-	-	-	rs768501276	NR	NR	none	NR	NR	none
1265	5	chr5:38528970	LIFR	-	ACACACACACAG	-	2/19	-	-	-	-	-	rs71604901,TMP_ESP_5_38528970_38528987	NR	NR	none	NR	NR	none
1134	4	chr4:62452932	LPHN3	C	T	-	3/24	-	-	-	-	-	rs1489874163	NR	NR	none	NR	NR	none
1135	4	chr4:62598548	LPHN3	A	G	7/25	-	800	471	157	A	gcG/gcA	rs191915391	NR	NR	none	NR	NR	none
1136	4	chr4:62598689	LPHN3	T	C	7/25	-	941	612	204	H	caC/caT	rs10434219	NR	NR	none	NR	NR	none
1137	4	chr4:62599099	LPHN3	G	A	7/25	-	1351	1022	341	Y/C	tAc/tGc	-	NR	NR	none	NR	NR	none
1138	4	chr4:62758491	LPHN3	A	G	9/25	-	1723	1394	465	R/Q	cGg/cAg	rs35106420	NR	NR	none	NR	NR	none
1139	4	chr4:62775483	LPHN3	A	G	-	11/24	-	-	-	-	-	rs12648576	NR	NR	none	NR	NR	none
1140	4	chr4:62775485	LPHN3	A	G	-	11/24	-	-	-	-	-	rs201167151	NR	NR	none	NR	NR	none
1141	4	chr4:62775487	LPHN3	A	G	-	11/24	-	-	-	-	-	rs777236325	NR	NR	none	NR	NR	none
1142	4	chr4:62775489	LPHN3	A	G	-	11/24	-	-	-	-	-	rs895921655	NR	NR	none	NR	NR	none
1143	4	chr4:62775491	LPHN3	A	G	-	11/24	-	-	-	-	-	rs1013081721	NR	NR	none	NR	NR	none
1144	4	chr4:62778452	LPHN3	T	C	12/25	-	2214	1885	629	R/C	Cgc/Tgc	rs761017943,COSM265492,COSM265493,COSM265494	NR	NR	none	NR	NR	none
1145	4	chr4:62800554	LPHN3	A	G	-	12/24	-	-	-	-	-	rs2305339	NR	NR	none	NR	NR	none
1146	4	chr4:62800728	LPHN3	C	T	13/25	-	2408	2079	693	N	aaT/aaC	rs734644,COSM4003110,COSM4003111,COSM4003112	NR	NR	none	NR	NR	none
1147	4	chr4:62812686	LPHN3	T	C	15/25	-	2599	2270	757	T/M	aCg/aTg	rs746668174,COSM124145,COSM124146	NR	NR	none	NR	NR	none
1148	4	chr4:62845388	LPHN3	G	C	17/25	-	3038	2709	903	R	cgG/cgC	rs1397547	NR	NR	none	NR	NR	none
1149	4	chr4:62845490	LPHN3	G	A	17/25	-	3140	2811	937	P	ccA/ccG	rs1397548	NR	NR	none	NR	NR	none
1150	4	chr4:62897317	LPHN3	A	C	22/25	-	3705	3376	1126	L/I	Cta/Ata	-	NR	NR	none	NR	NR	none
1151	4	chr4:62910254	LPHN3	A	G	24/25	-	3926	3597	1199	A	gcG/gcA	rs182596389,COSM193727,COSM193728,COSM288964	NR	NR	none	NR	NR	none
1152	4	chr4:62936046	LPHN3	A	G	25/25	-	4159	3830	1277	R/H	cGc/cAc	rs867851537,COSM5501088,COSM5501089	NR	NR	none	NR	NR	none
1034	3	chr3:188326955	LPP	G	A	6/11	-	682	436	146	T/A	Act/Gct	rs35417432	NR	NR	none	NR	NR	none
1035	3	chr3:188327409	LPP	T	A	6/11	-	1136	890	297	Y/F	tAt/tTt	rs1359549882,COSM6535239	NR	PATHOGENIC	PATHOGENIC	NR	Confirmed somatic variant	Confirmed somatic variant
1036	3	chr3:188327445	LPP	A	G	6/11	-	1172	926	309	G/D	gGc/gAc	rs146859876	NR	NR	none	NR	NR	none
1037	3	chr3:188327461	LPP	T	C	6/11	-	1188	942	314	D	gaC/gaT	rs1059380	NR	NR	none	NR	NR	none
1038	3	chr3:188327555	LPP	C	T	6/11	-	1282	1036	346	Y/H	Tat/Cat	rs7645635	NR	NR	none	NR	NR	none
1039	3	chr3:188327614	LPP	A	G	6/11	-	1341	1095	365	A	gcG/gcA	rs139912286	NR	NR	none	NR	NR	none
1040	3	chr3:188426196	LPP	A	G	-	7/10	-	-	-	-	-	rs372319831	NR	NR	none	NR	NR	none
1041	3	chr3:188478019	LPP	A	G	8/11	-	1605	1359	453	G	ggG/ggA	rs143323560	NR	NR	none	NR	NR	none
1042	3	chr3:188590446	LPP	G	A	10/11	-	1851	1605	535	R	cgA/cgG	rs1136644	NR	NR	none	NR	NR	none
593	2	chr2:140990917	LRP1B	G	T	-	90/90	-	-	-	-	-	rs76909136	NR	NR	none	NR	NR	none
594	2	chr2:141027926	LRP1B	G	A	-	85/90	-	-	-	-	-	rs3748865	NR	NR	none	NR	NR	none
595	2	chr2:141032088	LRP1B	T	C	85/91	-	14019	13047	4349	T	acG/acA	rs1386356,COSM6503366	NR	NEUTRAL	none	NR	Confirmed somatic variant	Confirmed somatic variant
596	2	chr2:141055451	LRP1B	C	G	84/91	-	13865	12893	4298	T/S	aCc/aGc	rs139037100	NR	NR	none	NR	NR	none
597	2	chr2:141079482	LRP1B	G	T	-	82/90	-	-	-	-	-	-	NR	NR	none	NR	NR	none
598	2	chr2:141092084	LRP1B	G	T	79/91	-	13133	12161	4054	E/A	gAa/gCa	rs79879036,COSM5019250	NR	PATHOGENIC	PATHOGENIC	NR	Confirmed somatic variant	Confirmed somatic variant
599	2	chr2:141093253	LRP1B	A	G	78/91	-	13019	12047	4016	P/L	cCc/cTc	rs150957163	NR	NR	none	NR	NR	none
600	2	chr2:141115582	LRP1B	A	G	74/91	-	12333	11361	3787	C	tgC/tgT	rs35757222,COSM1564791	NEUTRAL	NEUTRAL	none	Confirmed somatic variant	Confirmed somatic variant	Confirmed somatic variant
601	2	chr2:141116447	LRP1B	T	G	73/91	-	12172	11200	3734	Q/K	Caa/Aaa	rs35546150,COSM5019952,COSM6492449	NR	PATHOGENIC	PATHOGENIC	NR	Confirmed somatic variant	Confirmed somatic variant
602	2	chr2:141130548	LRP1B	C	T	-	69/90	-	-	-	-	-	rs13031631	NR	NR	none	NR	NR	none
603	2	chr2:141130695	LRP1B	T	C	69/91	-	11622	10650	3550	E	gaG/gaA	rs16843864,COSM3757649	NEUTRAL	NEUTRAL	none	Confirmed somatic variant	Confirmed somatic variant	Confirmed somatic variant
604	2	chr2:141143606	LRP1B	C	T	-	66/90	-	-	-	-	-	rs139843459	NR	NR	none	NR	NR	none
605	2	chr2:141201978	LRP1B	A	C	65/91	-	11187	10215	3405	K/N	aaG/aaT	COSM1007006	NR	PATHOGENIC	PATHOGENIC	NR	Variant of unknown origin	none
606	2	chr2:141202026	LRP1B	CA	AT	-	64/90	-	-	-	-	-	-	NR	NR	none	NR	NR	none
607	2	chr2:141214069	LRP1B	G	C	62/91	-	10890	9918	3306	L	ctG/ctC	-	NR	NR	none	NR	NR	none
608	2	chr2:141232800	LRP1B	T	C	60/91	-	10504	9532	3178	A/T	Gca/Aca	rs72899872,COSM5019598	NR	PATHOGENIC	PATHOGENIC	NR	Confirmed somatic variant	Confirmed somatic variant
609	2	chr2:141232924	LRP1B	C	T	-	59/90	-	-	-	-	-	-	NR	NR	none	NR	NR	none
610	2	chr2:141242882	LRP1B	T	A	-	59/90	-	-	-	-	-	rs112109442	NR	NR	none	NR	NR	none
611	2	chr2:141242918	LRP1B	C	T	59/91	-	10391	9419	3140	Q/R	cAa/cGa	rs34488772,COSM5019197	NR	NEUTRAL	none	NR	Confirmed somatic variant	Confirmed somatic variant
612	2	chr2:141245207	LRP1B	G	A	58/91	-	10194	9222	3074	C	tgT/tgC	COSM3567168	NR	PATHOGENIC	PATHOGENIC	NR	Confirmed somatic variant	Confirmed somatic variant
613	2	chr2:141253408	LRP1B	C	T	-	55/90	-	-	-	-	-	rs11683334	NR	NR	none	NR	NR	none
614	2	chr2:141259376	LRP1B	A	G	55/91	-	9702	8730	2910	C	tgC/tgT	rs35164907,COSM3757651	0	NR	none	Confirmed somatic variant	NR	Confirmed somatic variant
615	2	chr2:141260507	LRP1B	C	T	-	54/90	-	-	-	-	-	rs4450541	NR	NR	none	NR	NR	none
616	2	chr2:141260668	LRP1B	G	A	54/91	-	9498	8526	2842	Y	taT/taC	rs4444457,COSM3757652	NEUTRAL	NEUTRAL	none	Confirmed somatic variant	Confirmed somatic variant	Confirmed somatic variant
617	2	chr2:141267573	LRP1B	A	G	52/91	-	9294	8322	2774	C	tgC/tgT	rs35821928,COSM5020025	NR	NEUTRAL	none	NR	Confirmed somatic variant	Confirmed somatic variant
618	2	chr2:141272253	LRP1B	T	C	51/91	-	9210	8238	2746	G	ggG/ggA	rs61732738	NR	NR	none	NR	NR	none
619	2	chr2:141274576	LRP1B	C	T	50/91	-	9003	8031	2677	Q	caA/caG	rs4954672,COSM4001201	NR	PATHOGENIC	PATHOGENIC	NR	Confirmed somatic variant	Confirmed somatic variant
620	2	chr2:141283545	LRP1B	A	G	49/91	-	8866	7894	2632	H/Y	Cat/Tat	rs1314421642	NR	NR	none	NR	NR	none
621	2	chr2:141283603	LRP1B	G	T	-	48/90	-	-	-	-	-	rs1352047	NR	NR	none	NR	NR	none
622	2	chr2:141298682	LRP1B	C	G	-	44/90	-	-	-	-	-	rs11694934	NR	NR	none	NR	NR	none
623	2	chr2:141299317	LRP1B	G	A	-	44/90	-	-	-	-	-	rs9287535	NR	NR	none	NR	NR	none
624	2	chr2:141299350	LRP1B	T	C	44/91	-	8357	7385	2462	S/N	aGc/aAc	-	NR	NR	none	NR	NR	none
625	2	chr2:141359237	LRP1B	T	A	-	41/90	-	-	-	-	-	rs76357349	NR	NR	none	NR	NR	none
626	2	chr2:141359287	LRP1B	T	C	-	41/90	-	-	-	-	-	rs1441465	NR	NR	none	NR	NR	none
627	2	chr2:141473505	LRP1B	T	A	-	37/90	-	-	-	-	-	rs4954852	NR	NR	none	NR	NR	none
628	2	chr2:141474403	LRP1B	A	-	-	35/90	-	-	-	-	-	rs562408545	NR	NR	none	NR	NR	none
629	2	chr2:141528592	LRP1B	C	T	-	33/90	-	-	-	-	-	rs7599219	NR	NR	none	NR	NR	none
630	2	chr2:141533662	LRP1B	C	T	-	33/90	-	-	-	-	-	rs996361	NR	NR	none	NR	NR	none
631	2	chr2:141571329	LRP1B	C	T	32/91	-	6228	5256	1752	S	tcA/tcG	rs3749010,COSM4133144	NR	NEUTRAL	none	NR	Confirmed somatic variant	Confirmed somatic variant
632	2	chr2:141597722	LRP1B	A	C	-	30/90	-	-	-	-	-	rs13415934	NR	NR	none	NR	NR	none
633	2	chr2:141598592	LRP1B	C	A	30/91	-	5981	5009	1670	F/C	tTt/tGt	-	NR	NR	none	NR	NR	none
634	2	chr2:141598681	LRP1B	C	A	-	29/90	-	-	-	-	-	rs74787922	NR	NR	none	NR	NR	none
635	2	chr2:141607771	LRP1B	A	G	29/91	-	5811	4839	1613	F	ttC/ttT	rs766034085,COSM1007041,COSM4804027	NEUTRAL	NEUTRAL	none	Confirmed somatic variant	Confirmed somatic variant	Confirmed somatic variant
636	2	chr2:141607792	LRP1B	G	A	29/91	-	5790	4818	1606	D	gaT/gaC	rs867467038	NR	NR	none	NR	NR	none
637	2	chr2:141607906	LRP1B	T	A	-	28/90	-	-	-	-	-	-	NR	NR	none	NR	NR	none
638	2	chr2:141625410	LRP1B	C	A	-	26/90	-	-	-	-	-	rs12987572,COSM5019385	NR	PATHOGENIC	PATHOGENIC	NR	Confirmed somatic variant	Confirmed somatic variant
639	2	chr2:141641451	LRP1B	C	T	25/91	-	5076	4104	1368	L	ctA/ctG	rs142437710	NR	NR	none	NR	NR	none
640	2	chr2:141680645	LRP1B	C	A	21/91	-	4180	3208	1070	L/V	Ttg/Gtg	-	NR	NR	none	NR	NR	none
641	2	chr2:141707855	LRP1B	C	T	20/91	-	4057	3085	1029	N/D	Aat/Gat	rs561355378	NR	NR	none	NR	NR	none
642	2	chr2:141707868	LRP1B	T	G	20/91	-	4044	3072	1024	A	gcC/gcA	rs6748626,COSM3757654	PATHOGENIC	PATHOGENIC	PATHOGENIC	Confirmed somatic variant	Confirmed somatic variant	Confirmed somatic variant
643	2	chr2:141739766	LRP1B	A	G	18/91	-	3822	2850	950	D	gaC/gaT	rs113154312,COSM3961236	NEUTRAL	NEUTRAL	none	Confirmed somatic variant	Confirmed somatic variant	Confirmed somatic variant
644	2	chr2:141739805	LRP1B	T	C	18/91	-	3783	2811	937	G	ggG/ggA	rs113493406	NR	NR	none	NR	NR	none
645	2	chr2:141739814	LRP1B	A	G	18/91	-	3774	2802	934	C	tgC/tgT	rs138953199,COSM5474326	NEUTRAL	NEUTRAL	none	Confirmed somatic variant	Confirmed somatic variant	Confirmed somatic variant
646	2	chr2:141747249	LRP1B	T	A	-	16/90	-	-	-	-	-	rs1429365	NR	NR	none	NR	NR	none
647	2	chr2:141747293	LRP1B	C	T	-	16/90	-	-	-	-	-	rs1429366	NR	NR	none	NR	NR	none
648	2	chr2:141751592	LRP1B	A	G	16/91	-	3588	2616	872	D	gaC/gaT	rs13007735,COSM3682418,COSM4964776	NEUTRAL	NEUTRAL	none	Confirmed somatic variant	Confirmed somatic variant	Confirmed somatic variant
649	2	chr2:141751676	LRP1B	C	T	16/91	-	3504	2532	844	I/M	atA/atG	rs147402550	NR	NR	none	NR	NR	none
650	2	chr2:141771058	LRP1B	A	T	-	14/90	-	-	-	-	-	rs3791766	NR	NR	none	NR	NR	none
651	2	chr2:141773397	LRP1B	A	C	13/91	-	3030	2058	686	R	cgG/cgT	rs78806080,COSM7232829	NR	PATHOGENIC	PATHOGENIC	NR	Confirmed somatic variant	Confirmed somatic variant
652	2	chr2:141819743	LRP1B	T	C	8/91	-	2085	1113	371	Q	caG/caA	-	NR	NR	none	NR	NR	none
653	2	chr2:141945949	LRP1B	T	C	-	7/90	-	-	-	-	-	rs1249434	NR	NR	none	NR	NR	none
654	2	chr2:141946088	LRP1B	A	G	7/91	-	1887	915	305	D	gaC/gaT	rs755407635	NR	NR	none	NR	NR	none
655	2	chr2:141986696	LRP1B	A	G	-	6/90	-	-	-	-	-	-	NR	NR	none	NR	NR	none
656	2	chr2:142004935	LRP1B	C	A	-	4/90	-	-	-	-	-	-	NR	NR	none	NR	NR	none
657	2	chr2:142012027	LRP1B	T	G	-	4/90	-	-	-	-	-	rs431809	NR	NR	none	NR	NR	none
658	2	chr2:142012036	LRP1B	G	T	-	4/90	-	-	-	-	-	rs9973397	NR	NR	none	NR	NR	none
659	2	chr2:142012161	LRP1B	T	C	4/91	-	1365	393	131	M/I	atG/atA	rs151247276,COSM4991605	NR	NEUTRAL	none	NR	Confirmed somatic variant	Confirmed somatic variant
660	2	chr2:142567910	LRP1B	C	T	2/91	-	1115	143	48	Q/R	cAg/cGg	rs12990449,COSM5019848	NR	PATHOGENIC	PATHOGENIC	NR	Confirmed somatic variant	Confirmed somatic variant
661	2	chr2:142888193	LRP1B	TA	GG	-	1/90	-	-	-	-	-	-	NR	NR	none	NR	NR	none
662	2	chr2:142888376	LRP1B	C	G	1/91	-	895	-	-	-	-	rs1375610	NR	NR	none	NR	NR	none
857	3	chr3:46479586	LTF	C	T	16/17	-	2239	1943	648	D/G	gAc/gGc	rs200727604	NR	NR	none	NR	NR	none
858	3	chr3:46480801	LTF	G	A	15/17	-	2190	1894	632	L	Ttg/Ctg	rs9110,CM073189	NR	NR	none	NR	NR	none
859	3	chr3:46480854	LTF	A	G	15/17	-	2137	1841	614	P/L	cCg/cTg	rs144149027	NR	NR	none	NR	NR	none
[truncated: 2,258 more rows]
