# Supplementary material for: Identification of Novel Mutations in Colorectal Cancer Patients using Ampliseq Comprehensive Cancer Panel
Source: Preprints.org preprint supplement (doi:10.20944/preprints202104.0401.v1), 2021-04-15
Supplement: Supplementary file 3 [file supplementary]

Supplementary table S6

| sn   | CHR | SNP             | Gene ID_CRC_P |   | A1 | A2     | EXON | INTRON |
|------|-----|-----------------|---------------|---|----|--------|------|--------|
| 1309 | 5   | chr5:112175216  | APC           | T | G  | 16/16  | -    |        |
| 2910 | 12  | chr12:46230604  | ARID2         | T | C  | 8/21   | -    |        |
| 2831 | 11  | chr11:108175462 | ATM           | A | G  | 37/63  | -    |        |
| 2832 | 11  | chr11:108175463 | ATM           | T | A  | 37/63  | -    |        |
| 392  | 1   | chr1:193111048  | CDC73         | T | G  | 7/17   | -    |        |
| 3162 | 14  | chr14:95595941  | DICER1        | T | C  | 8/29   | -    |        |
| 2089 | 7   | chr7:148525904  | EZH2          | G | C  | 6/20   | -    |        |
| 4207 | 23  | chrX:44969370   | KDM6A         | A | G  | 28/29  | -    |        |
| 1112 | 4   | chr4:55593464   | KIT           | C | A  | 10/21  | -    |        |
| 1116 | 4   | chr4:55599268   | KIT           | T | C  | 17/21  | -    |        |
| 1106 | 4   | chr4:55152040   | PDGFRA        | T | C  | 18/23  | -    |        |
| 1774 | 6   | chr6:152706918  | SYNE1         | A | G  | 55/146 | -    |        |
| 3556 | 17  | chr17:7577498   | TP53          | T | C  | -      | 7/10 |        |
| 3557 | 17  | chr17:7577538   | TP53          | T | C  | 7/11   | -    |        |
| 3558 | 17  | chr17:7577539   | TP53          | A | G  | 7/11   | -    |        |
| 3560 | 17  | chr17:7577556   | TP53          | T | C  | 7/11   | -    |        |
| 3566 | 17  | chr17:7578404   | TP53          | T | A  | 5/11   | -    |        |
| 3567 | 17  | chr17:7578406   | TP53          | T | C  | 5/11   | -    |        |

| cDNA_positio | CDS_positio | Protein_po | Amino_aci | Codons  | Existing_va | large_intes | all_pathog | pathogenic |
|--------------|-------------|------------|-----------|---------|-------------|-------------|------------|------------|
| 4305         | 3925        | 1309       | E/*       | Gaa/Taa | COSM1877    | PATHOGEN    | PATHOGEN   | PATHOGEN   |
| 1025         | 853         | 285        | R/W       | Cgg/Tgg | COSM1890    | PATHOGEN    | PATHOGEN   | PATHOGEN   |
| 5942         | 5557        | 1853       | D/N       | Gat/Aat | COSM4159    | PATHOGEN    | PATHOGEN   | PATHOGEN   |
| 5943         | 5558        | 1853       | D/V       | gAt/gTt | COSM2162    | PATHOGEN    | PATHOGEN   | PATHOGEN   |
| 765          | 581         | 194        | R/I       | aGa/aTa | ,COSM901    | PATHOGEN    | PATHOGEN   | PATHOGEN   |
| 894          | 602         | 201        | R/H       | cGc/cAc | COSM1238    | PATHOGEN    | PATHOGEN   | PATHOGEN   |
| 675          | 553         | 185        | D/H       | Gac/Cac | COSM3762    | PATHOGEN    | PATHOGEN   | PATHOGEN   |
| 4093         | 4052        | 1351       | R/Q       | cGa/cAa | rs3707654   | PATHOGEN    | PATHOGEN   | PATHOGEN   |
| 1718         | 1621        | 541        | M/L       | Atg/Ctg | rs3822214   | PATHOGEN    | PATHOGEN   | PATHOGEN   |
| 2491         | 2394        | 798        | I         | atC/atT | rs5578961   | PATHOGEN    | PATHOGEN   | PATHOGEN   |
| 2803         | 2472        | 824        | V         | gtC/gtT | rs2228230   | PATHOGEN    | PATHOGEN   | PATHOGEN   |
| 9145         | 8543        | 2848       | A/V       | gCg/gTg | rs3688323   | PATHOGEN    | PATHOGEN   | PATHOGEN   |
| -            | -           | -          | -         | -       | TP53_g.13   | PATHOGEN    | PATHOGEN   | PATHOGEN   |
| 933          | 743         | 248        | R/Q       | cGg/cAg | rs1154065   | PATHOGEN    | PATHOGEN   | PATHOGEN   |
| 932          | 742         | 248        | R/W       | Cgg/Tgg | rs1219126   | PATHOGEN    | PATHOGEN   | PATHOGEN   |
| 915          | 725         | 242        | C/Y       | tGc/tAc | rs1219126   | PATHOGEN    | PATHOGEN   | PATHOGEN   |
| 716          | 526         | 176        | C/S       | Tgc/Agc | rs9674618   | PATHOGEN    | PATHOGEN   | PATHOGEN   |
| 714          | 524         | 175        | R/H       | cGc/cAc | CM062017    | PATHOGEN    | PATHOGEN   | PATHOGEN   |

large\_intes all\_somatic Somatic  
 Reported ir Reported ir none  
 Confirmed Reported ir Confirmed somatic variant  
 Reported ir Reported ir none  
 Confirmed Reported ir Confirmed somatic variant  
 Confirmed Reported ir Confirmed somatic variant  
 Confirmed Reported ir Confirmed somatic variant  
 Reported ir Reported ir none  
 Confirmed Reported ir Confirmed somatic variant  
 Confirmed Reported ir Confirmed somatic variant  
 Confirmed Reported ir Confirmed somatic variant  
 Reported ir Reported ir none  
 Confirmed Reported ir Confirmed somatic variant

other cancer type  
 Endometrioid carcinoma  
 endometrium,pancreatic and stomach  
 Prostate and breast  
 prostate and lung  
 endometrium  
 Oesophagus  
 Prostate  
 Central nervous system  
 Lung, Breast and Bone  
 Haematopoietic and lymphoid, soft tissue,Bor  
 Haematopoietic and lymphoid, soft tissue,Bor  
 Liver and Kidney  
 Breast, Lung , Stomach and Upperaerodigestiv  
 Breast, Haematopoietic and lymphoid, Oesopl  
 Prostate, biliary tract, Central Nervous System  
 Breast, Pancreas, Lung and Upperaerodigestiv  
 Breast, Haematopoietic and lymphoid, Oesopl  
 Breast, Stomachs and Central Nervous System

re and Testis

re and Testis

re tract

agus and Upperaerodigestive tract

1 and Upperaerodigestive tract

re tract

agus and Central Nervous System

1
