# Supplementary material for: Identification of Novel Mutations in Colorectal Cancer Patients using Ampliseq Comprehensive Cancer Panel
Source: Preprints.org preprint supplement (doi:10.20944/preprints202104.0401.v1), 2021-04-15
Supplement: Supplementary file 4 [file supplementary]

Archive with 11 entries (10 files):
- supplementary tables/
- supplementary tables/Supplementary Table S1.docx
- supplementary tables/Supplementary Table S2.pdf
- supplementary tables/Supplementary Table S2.xlsx
- supplementary tables/Supplementary Table S3.pdf
- supplementary tables/Supplementary Table S3.XLSX
- supplementary tables/Supplementary Table S4.xlsx
- supplementary tables/Supplementary Table S5.csv
- supplementary tables/Supplementary Table S6.pdf
- supplementary tables/Supplementary Table S6.xlsx
- supplementary tables/Supplementary Table S7.xlsx
