# Supplementary material for: Identification of Novel Mutations in Colorectal Cancer Patients using Ampliseq Comprehensive Cancer Panel
Source: Preprints.org preprint supplement (doi:10.20944/preprints202104.0401.v1), 2021-04-15
Supplement: Supplementary file 4 [file supplementary › supplementary tables/Supplementary Table S2.xlsx]

## Sheet: Sheet1
Supplementary Table S2
sn	CHR	SNP	Gene ID_CRC_Panel	A1	A2	MAF	A1A1	A1A2	A2A2	O(HET)	E(HET)	P	Location	Allele	Consequence	IMPACT	SYMBOL	Gene	Feature_type	Feature	BIOTYPE	EXON	INTRON	HGVSc	HGVSp	cDNA_position	CDS_position	Protein_position	Amino_acids	Codons	Existing_variation	DISTANCE	STRAND	FLAGS	SYMBOL_SOURCE	HGNC_ID	CANONICAL	MANE	TSL	APPRIS	CCDS	ENSP	SWISSPROT	TREMBL	UNIPARC	SIFT	PolyPhen	DOMAINS	HGVS_OFFSET
665	2	chr2:148672817	ACVR2A	T	G	0.005556	0	1	89	0.01111	0.01105	1	2:148672817-148672817	T	stop_gained	HIGH	ACVR2A	ENSG00000121989	Transcript	ENST00000241416.7	protein_coding	5/11	-	ENST00000241416.7:c.586G>T	ENSP00000241416.7:p.Glu196Ter	1222	586	196	E/*	Gaa/Taa	-	-	1	-	HGNC	173	YES	-	-	-	CCDS33301.1	ENSP00000241416	P27037	B4DWQ2	UPI0000126673	-	-	Superfamily_domains:SSF56112,SMART_domains:SM00220,Gene3D:3.30.200.20,Pfam_domain:PF00069,hmmpanther:PTHR23255,hmmpanther:PTHR23255:SF64,PROSITE_profiles:PS50011	-
2899	12	chr12:43846296	ADAMTS20	T	G	0.005556	0	1	89	0.01111	0.01105	1	12:43846296-43846296	T	intron_variant	MODIFIER	ADAMTS20	ENSG00000173157	Transcript	ENST00000389420.3	protein_coding	-	13/38	ENST00000389420.3:c.1942+21C>A	-	-	-	-	-	-	-	-	-1	-	HGNC	17178	YES	-	-	-	CCDS31778.2	ENSP00000374071	P59510	-	UPI00004565F4	-	-	-	-
1154	4	chr4:87967279	AFF1	C	A	0.005556	0	1	89	0.01111	0.01105	1	4:87967279-87967279	C	intron_variant	MODIFIER	AFF1	ENSG00000172493	Transcript	ENST00000395146.4	protein_coding	-	2/20	ENST00000395146.4:c.39-39A>C	-	-	-	-	-	-	-	-	1	-	HGNC	7135	YES	-	-	-	CCDS54775.1	ENSP00000378578	P51825	Q712L1,F5GXF9,D6RIZ5,D6RAU0	UPI000013EC52	-	-	-	-
1155	4	chr4:87967936	AFF1	T	C	0.005556	0	1	89	0.01111	0.01105	1	4:87967936-87967936	T	synonymous_variant	LOW	AFF1	ENSG00000172493	Transcript	ENST00000395146.4	protein_coding	4/21	-	ENST00000395146.4:c.249C>T	ENSP00000378578.4:p.His83%3D	524	249	83	H	caC/caT	-	-	1	-	HGNC	7135	YES	-	-	-	CCDS54775.1	ENSP00000378578	P51825	Q712L1,F5GXF9,D6RIZ5,D6RAU0	UPI000013EC52	-	-	Pfam_domain:PF05110,hmmpanther:PTHR10528,hmmpanther:PTHR10528:SF14	-
1912	7	chr7:91631234	AKAP9	C	A	0.005556	0	1	89	0.01111	0.01105	1	7:91631234-91631234	C	missense_variant	MODERATE	AKAP9	ENSG00000127914	Transcript	ENST00000356239.3	protein_coding	8/50	-	ENST00000356239.3:c.2003A>C	ENSP00000348573.3:p.Asp668Ala	2236	2003	668	D/A	gAt/gCt	-	-	1	-	HGNC	379	YES	-	-	-	CCDS5622.1	ENSP00000348573	Q99996	Q8IW64	UPI000002A38D	deleterious(0)	possibly_damaging(0.585)	Coiled-coils_(Ncoils):Coil,hmmpanther:PTHR18932,hmmpanther:PTHR18932:SF10	-
1915	7	chr7:91641671	AKAP9	TGC	CAA	0.005556	0	1	89	0.01111	0.01105	1	7:91641671-91641673	TGC	intron_variant	MODIFIER	AKAP9	ENSG00000127914	Transcript	ENST00000356239.3	protein_coding	-	8/49	ENST00000356239.3:c.3319-72_3319-70delinsTGC	-	-	-	-	-	-	-	-	1	-	HGNC	379	YES	-	-	-	CCDS5622.1	ENSP00000348573	Q99996	Q8IW64	UPI000002A38D	-	-	-	-
1919	7	chr7:91670064	AKAP9	C	T	0.005556	0	1	89	0.01111	0.01105	1	7:91670064-91670064	C	missense_variant	MODERATE	AKAP9	ENSG00000127914	Transcript	ENST00000356239.3	protein_coding	18/50	-	ENST00000356239.3:c.4769T>C	ENSP00000348573.3:p.Met1590Thr	5002	4769	1590	M/T	aTg/aCg	-	-	1	-	HGNC	379	YES	-	-	-	CCDS5622.1	ENSP00000348573	Q99996	Q8IW64	UPI000002A38D	deleterious(0)	possibly_damaging(0.64)	Coiled-coils_(Ncoils):Coil,hmmpanther:PTHR18932,hmmpanther:PTHR18932:SF10	-
1921	7	chr7:91672096	AKAP9	G	T	0.005556	0	1	89	0.01111	0.01105	1	7:91672096-91672096	G	intron_variant	MODIFIER	AKAP9	ENSG00000127914	Transcript	ENST00000356239.3	protein_coding	-	20/49	ENST00000356239.3:c.5162+11T>G	-	-	-	-	-	-	-	-	1	-	HGNC	379	YES	-	-	-	CCDS5622.1	ENSP00000348573	Q99996	Q8IW64	UPI000002A38D	-	-	-	-
1923	7	chr7:91699372	AKAP9	A	-	0.005556	0	1	89	0.01111	0.01105	1	7:91699371-91699371	A	frameshift_variant	HIGH	AKAP9	ENSG00000127914	Transcript	ENST00000356239.3	protein_coding	27/50	-	ENST00000356239.3:c.6364dup	ENSP00000348573.3:p.Thr2122AsnfsTer6	6591-6592	6358-6359	2120	E/EX	gaa/gAaa	-	-	1	-	HGNC	379	YES	-	-	-	CCDS5622.1	ENSP00000348573	Q99996	Q8IW64	UPI000002A38D	-	-	Coiled-coils_(Ncoils):Coil,hmmpanther:PTHR18932,hmmpanther:PTHR18932:SF10	6
1927	7	chr7:91709156	AKAP9	G	T	0.005556	0	1	89	0.01111	0.01105	1	7:91709156-91709156	G	missense_variant	MODERATE	AKAP9	ENSG00000127914	Transcript	ENST00000356239.3	protein_coding	31/50	-	ENST00000356239.3:c.7709T>G	ENSP00000348573.3:p.Phe2570Cys	7942	7709	2570	F/C	tTc/tGc	-	-	1	-	HGNC	379	YES	-	-	-	CCDS5622.1	ENSP00000348573	Q99996	Q8IW64	UPI000002A38D	deleterious(0.03)	possibly_damaging(0.513)	hmmpanther:PTHR18932,hmmpanther:PTHR18932:SF10	-
1929	7	chr7:91712728	AKAP9	A	C	0.005556	0	1	89	0.01111	0.01105	1	7:91712728-91712728	A	missense_variant	MODERATE	AKAP9	ENSG00000127914	Transcript	ENST00000356239.3	protein_coding	33/50	-	ENST00000356239.3:c.8405C>A	ENSP00000348573.3:p.Ala2802Glu	8638	8405	2802	A/E	gCa/gAa	-	-	1	-	HGNC	379	YES	-	-	-	CCDS5622.1	ENSP00000348573	Q99996	Q8IW64	UPI000002A38D	tolerated(0.13)	benign(0.012)	hmmpanther:PTHR18932,hmmpanther:PTHR18932:SF10	-
3951	19	chr19:40741244	AKT2	A	G	0.005556	0	1	89	0.01111	0.01105	1	19:40741244-40741244	A	missense_variant	MODERATE	AKT2	ENSG00000105221	Transcript	ENST00000392038.2	protein_coding	12/14	-	ENST00000392038.2:c.1189C>T	ENSP00000375892.2:p.Pro397Ser	1488	1189	397	P/S	Ccc/Tcc	-	-	-1	-	HGNC	392	YES	-	-	-	CCDS12552.1	ENSP00000375892	P31751	Q05BV0,M0QZK3,J3QQM6,J3QLS6,J3QL45,J3KSY8,J3KRI8,E7EVP8,C9JIJ1,C9JIF6,C9JHS6,C9JC83,C9J258,B4DG79,B3KP61,A8MX96	UPI0000049EDB	tolerated(0.16)	benign(0.035)	Gene3D:1.10.510.10,Pfam_domain:PF00069,PROSITE_profiles:PS50011,hmmpanther:PTHR24352,hmmpanther:PTHR24352:SF28,SMART_domains:SM00220,Superfamily_domains:SSF56112	-
486	1	chr1:243727211	AKT3	-	T	0.005556	0	1	89	0.01111	0.01105	1	1:243727210-243727211	-	intron_variant	MODIFIER	AKT3	ENSG00000117020	Transcript	ENST00000366539.1	protein_coding	-	9/13	ENST00000366539.1:c.820-61del	-	-	-	-	-	-	-	-	-1	-	HGNC	393	YES	-	-	-	CCDS31077.1	ENSP00000355497	Q9Y243	F8VS91	UPI00000335E8	-	-	-	-
520	2	chr2:29498305	ALK	-	A	0.005556	0	1	89	0.01111	0.01105	1	2:29498304-29498305	-	frameshift_variant	HIGH	ALK	ENSG00000171094	Transcript	ENST00000389048.3	protein_coding	10/29	-	ENST00000389048.3:c.1875del	ENSP00000373700.3:p.Phe625LeufsTer40	2782	1875	625	F/X	ttT/tt	-	-	-1	-	HGNC	427	YES	-	-	-	CCDS33172.1	ENSP00000373700	Q9UM73	Q580I3	UPI00001684DA	-	-	Pfam_domain:PF00629,PROSITE_profiles:PS50060,Superfamily_domains:SSF49899	-
1299	5	chr5:112164622	APC	A	G	0.005556	0	1	89	0.01111	0.01105	1	5:112164622-112164622	A	missense_variant	MODERATE	APC	ENSG00000134982	Transcript	ENST00000457016.1	protein_coding	14/16	-	ENST00000457016.1:c.1696G>A	ENSP00000413133.1:p.Val566Ile	2076	1696	566	V/I	Gtt/Att	-	-	1	-	HGNC	583	YES	-	-	-	CCDS4107.1	ENSP00000413133	P25054	Q9UM98,Q9P119,Q9HAW6,Q4LE70,E9PFT7,D6RFL6,B2ZRE1,A5HB97,A5HB96,A5HB95,A5HB94,A1YIQ7	UPI000013CF60	tolerated(0.17)	benign(0.007)	hmmpanther:PTHR12607,hmmpanther:PTHR12607:SF11,Gene3D:1.25.10.10,SMART_domains:SM00185,Superfamily_domains:SSF48371	-
1300	5	chr5:112164623	APC	-	T	0.005556	0	1	89	0.01111	0.01105	1	5:112164622-112164623	-	frameshift_variant	HIGH	APC	ENSG00000134982	Transcript	ENST00000457016.1	protein_coding	14/16	-	ENST00000457016.1:c.1698del	ENSP00000413133.1:p.Gly567GlufsTer3	2077	1697	566	V/X	gTt/gt	-	-	1	-	HGNC	583	YES	-	-	-	CCDS4107.1	ENSP00000413133	P25054	Q9UM98,Q9P119,Q9HAW6,Q4LE70,E9PFT7,D6RFL6,B2ZRE1,A5HB97,A5HB96,A5HB95,A5HB94,A1YIQ7	UPI000013CF60	-	-	hmmpanther:PTHR12607,hmmpanther:PTHR12607:SF11,Gene3D:1.25.10.10,SMART_domains:SM00185,Superfamily_domains:SSF48371	1
1303	5	chr5:112173971	APC	TA	GT	0.005556	0	1	89	0.01111	0.01105	1	5:112173971-112173972	TA	stop_gained	HIGH	APC	ENSG00000134982	Transcript	ENST00000457016.1	protein_coding	16/16	-	ENST00000457016.1:c.2680_2681delinsTA	ENSP00000413133.1:p.Val894Ter	3060-3061	2680-2681	894	V/*	GTg/TAg	-	-	1	-	HGNC	583	YES	-	-	-	CCDS4107.1	ENSP00000413133	P25054	Q9UM98,Q9P119,Q9HAW6,Q4LE70,E9PFT7,D6RFL6,B2ZRE1,A5HB97,A5HB96,A5HB95,A5HB94,A1YIQ7	UPI000013CF60	-	-	hmmpanther:PTHR12607,hmmpanther:PTHR12607:SF11	-
1307	5	chr5:112175208	APC	-	A	0.005556	0	1	89	0.01111	0.01105	1	5:112175207-112175208	-	frameshift_variant	HIGH	APC	ENSG00000134982	Transcript	ENST00000457016.1	protein_coding	16/16	-	ENST00000457016.1:c.3919del	ENSP00000413133.1:p.Ile1307Ter	4297	3917	1306	E/X	gAa/ga	-	-	1	-	HGNC	583	YES	-	-	-	CCDS4107.1	ENSP00000413133	P25054	Q9UM98,Q9P119,Q9HAW6,Q4LE70,E9PFT7,D6RFL6,B2ZRE1,A5HB97,A5HB96,A5HB95,A5HB94,A1YIQ7	UPI000013CF60	-	-	hmmpanther:PTHR12607,hmmpanther:PTHR12607:SF11	2
1316	5	chr5:112175611	APC	-	ACCACCTCCTCAAACAGCTCAA	0.005556	0	1	89	0.01111	0.01105	1	5:112175610-112175632	-	frameshift_variant	HIGH	APC	ENSG00000134982	Transcript	ENST00000457016.1	protein_coding	16/16	-	ENST00000457016.1:c.4324_4345del	ENSP00000413133.1:p.Pro1442SerfsTer24	4700-4721	4320-4341	1440-1447	PPPPQTAQ/X	ccACCACCTCCTCAAACAGCTCAA/cc	-	-	1	-	HGNC	583	YES	-	-	-	CCDS4107.1	ENSP00000413133	P25054	Q9UM98,Q9P119,Q9HAW6,Q4LE70,E9PFT7,D6RFL6,B2ZRE1,A5HB97,A5HB96,A5HB95,A5HB94,A1YIQ7	UPI000013CF60	-	-	Low_complexity_(Seg):seg,hmmpanther:PTHR12607,hmmpanther:PTHR12607:SF11	4
4226	23	chrX:66943601	AR	-	A	0.088	4	0	31	0	0.2024	5.546e-006	X:66943600-66943601	-	frameshift_variant	HIGH	AR	ENSG00000169083	Transcript	ENST00000374690.3	protein_coding	8/8	-	ENST00000374690.3:c.2683del	ENSP00000363822.3:p.Met895Ter	3205	2681	894	E/X	gAa/ga	-	-	1	-	HGNC	644	YES	-	-	-	CCDS14387.1	ENSP00000363822	-	Q9NUA2,Q9BZG5	UPI0000167B08	-	-	Gene3D:1.10.565.10,hmmpanther:PTHR24084,hmmpanther:PTHR24084:SF6,Superfamily_domains:SSF48508	2
62	1	chr1:27092820	ARID1A	-	A	0.005556	0	1	89	0.01111	0.01105	1	1:27092819-27092820	-	frameshift_variant	HIGH	ARID1A	ENSG00000117713	Transcript	ENST00000324856.7	protein_coding	9/20	-	ENST00000324856.7:c.2841del	ENSP00000320485.7:p.Tyr948IlefsTer20	3212	2841	947	P/X	ccA/cc	-	-	1	-	HGNC	11110	YES	-	-	-	CCDS285.1	ENSP00000320485	O14497	Q96T01,Q96SY8,Q96SM7,E9PQW6,C1KEN7,A4FU79	UPI0000167B91	-	-	hmmpanther:PTHR12656,hmmpanther:PTHR12656:SF12	-
63	1	chr1:27092822	ARID1A	T	A	0.005556	0	1	89	0.01111	0.01105	1	1:27092822-27092822	T	missense_variant	MODERATE	ARID1A	ENSG00000117713	Transcript	ENST00000324856.7	protein_coding	9/20	-	ENST00000324856.7:c.2843A>T	ENSP00000320485.7:p.Tyr948Phe	3214	2843	948	Y/F	tAt/tTt	-	-	1	-	HGNC	11110	YES	-	-	-	CCDS285.1	ENSP00000320485	O14497	Q96T01,Q96SY8,Q96SM7,E9PQW6,C1KEN7,A4FU79	UPI0000167B91	deleterious(0.04)	probably_damaging(0.97)	hmmpanther:PTHR12656,hmmpanther:PTHR12656:SF12	-
64	1	chr1:27097699	ARID1A	A	T	0.02222	1	2	87	0.02222	0.04346	0.03342	1:27097699-27097699	A	stop_gained	HIGH	ARID1A	ENSG00000117713	Transcript	ENST00000324856.7	protein_coding	12/20	-	ENST00000324856.7:c.3288T>A	ENSP00000320485.7:p.Tyr1096Ter	3659	3288	1096	Y/*	taT/taA	-	-	1	-	HGNC	11110	YES	-	-	-	CCDS285.1	ENSP00000320485	O14497	Q96T01,Q96SY8,Q96SM7,E9PQW6,C1KEN7,A4FU79	UPI0000167B91	-	-	Gene3D:1.10.150.60,Pfam_domain:PF01388,PROSITE_profiles:PS51011,hmmpanther:PTHR12656,hmmpanther:PTHR12656:SF12,SMART_domains:SM00501,SMART_domains:SM01014,Superfamily_domains:SSF46774	-
65	1	chr1:27099010	ARID1A	-	G	0.01111	1	0	89	0	0.02198	0.005587	1:27099009-27099010	-	frameshift_variant	HIGH	ARID1A	ENSG00000117713	Transcript	ENST00000324856.7	protein_coding	13/20	-	ENST00000324856.7:c.3429del	ENSP00000320485.7:p.Gln1145ArgfsTer16	3797	3426	1142	Q/X	caG/ca	-	-	1	-	HGNC	11110	YES	-	-	-	CCDS285.1	ENSP00000320485	O14497	Q96T01,Q96SY8,Q96SM7,E9PQW6,C1KEN7,A4FU79	UPI0000167B91	-	-	hmmpanther:PTHR12656,hmmpanther:PTHR12656:SF12,Low_complexity_(Seg):seg	3
70	1	chr1:27106343	ARID1A	T	C	0.005556	0	1	89	0.01111	0.01105	1	1:27106343-27106343	T	missense_variant	MODERATE	ARID1A	ENSG00000117713	Transcript	ENST00000324856.7	protein_coding	20/20	-	ENST00000324856.7:c.5954C>T	ENSP00000320485.7:p.Ser1985Phe	6325	5954	1985	S/F	tCc/tTc	-	-	1	-	HGNC	11110	YES	-	-	-	CCDS285.1	ENSP00000320485	O14497	Q96T01,Q96SY8,Q96SM7,E9PQW6,C1KEN7,A4FU79	UPI0000167B91	deleterious(0)	probably_damaging(0.999)	Pfam_domain:PF12031,hmmpanther:PTHR12656,hmmpanther:PTHR12656:SF12	-
2915	12	chr12:46285667	ARID2	C	A	0.005556	0	1	89	0.01111	0.01105	1	12:46285667-46285667	C	missense_variant	MODERATE	ARID2	ENSG00000189079	Transcript	ENST00000334344.6	protein_coding	17/21	-	ENST00000334344.6:c.5027A>C	ENSP00000335044.6:p.Gln1676Pro	5199	5027	1676	Q/P	cAg/cCg	-	-	1	-	HGNC	18037	YES	-	-	-	CCDS31783.1	ENSP00000335044	Q68CP9	Q96SQ4,F8WCU9	UPI00001D7973	tolerated(1)	benign(0.015)	hmmpanther:PTHR22970:SF14,hmmpanther:PTHR22970	-
312	1	chr1:150808978	ARNT	A	G	0.005556	0	1	89	0.01111	0.01105	1	1:150808978-150808978	A	intron_variant	MODIFIER	ARNT	ENSG00000143437	Transcript	ENST00000358595.5	protein_coding	-	6/21	ENST00000358595.5:c.487-9C>T	-	-	-	-	-	-	-	-	-1	-	HGNC	700	YES	-	-	-	CCDS970.1	ENSP00000351407	P27540	-	UPI0000030984	-	-	-	-
2814	11	chr11:108117897	ATM	TTA	ATT	0.005556	0	1	89	0.01111	0.01105	1	11:108117897-108117899	TTA	intron_variant	MODIFIER	ATM	ENSG00000149311	Transcript	ENST00000278616.4	protein_coding	-	8/62	ENST00000278616.4:c.1065+43_1065+45delinsTTA	-	-	-	-	-	-	-	-	1	-	HGNC	795	YES	-	-	-	CCDS31669.1	ENSP00000278616	Q13315	M0QXY8,E9PRG7,E9PIN0	UPI0000DBEF44	-	-	-	-
2833	11	chr11:108175596	ATM	G	T	0.005556	0	1	89	0.01111	0.01105	1	11:108175596-108175596	G	intron_variant	MODIFIER	ATM	ENSG00000149311	Transcript	ENST00000278616.4	protein_coding	-	37/62	ENST00000278616.4:c.5674+17T>G	-	-	-	-	-	-	-	-	1	-	HGNC	795	YES	-	-	-	CCDS31669.1	ENSP00000278616	Q13315	M0QXY8,E9PRG7,E9PIN0	UPI0000DBEF44	-	-	-	-
2835	11	chr11:108201010	ATM	C	T	0.005556	0	1	89	0.01111	0.01105	1	11:108201010-108201010	C	synonymous_variant	LOW	ATM	ENSG00000149311	Transcript	ENST00000278616.4	protein_coding	50/63	-	ENST00000278616.4:c.7377T>C	ENSP00000278616.4:p.Arg2459%3D	7762	7377	2459	R	cgT/cgC	-	-	1	-	HGNC	795	YES	-	-	-	CCDS31669.1	ENSP00000278616	Q13315	M0QXY8,E9PRG7,E9PIN0	UPI0000DBEF44	-	-	Superfamily_domains:SSF48371,Pfam_domain:PF02259,hmmpanther:PTHR11139,hmmpanther:PTHR11139:SF66,PROSITE_profiles:PS51189	-
979	3	chr3:142176618	ATR	-	T	0.005556	0	1	89	0.01111	0.01105	1	3:142176617-142176618	-	intron_variant	MODIFIER	ATR	ENSG00000175054	Transcript	ENST00000350721.4	protein_coding	-	44/46	ENST00000350721.4:c.7504-21del	-	-	-	-	-	-	-	-	-1	-	HGNC	882	YES	-	-	-	CCDS3124.1	ENSP00000343741	Q13535	-	UPI0000031A31	-	-	-	-
980	3	chr3:142176649	ATR	A	C	0.005556	0	1	89	0.01111	0.01105	1	3:142176649-142176649	A	intron_variant	MODIFIER	ATR	ENSG00000175054	Transcript	ENST00000350721.4	protein_coding	-	44/46	ENST00000350721.4:c.7504-52G>T	-	-	-	-	-	-	-	-	-1	-	HGNC	882	YES	-	-	-	CCDS3124.1	ENSP00000343741	Q13535	-	UPI0000031A31	-	-	-	-
982	3	chr3:142186845	ATR	-	T	0.005556	0	1	89	0.01111	0.01105	1	3:142186844-142186845	-	frameshift_variant	HIGH	ATR	ENSG00000175054	Transcript	ENST00000350721.4	protein_coding	39/47	-	ENST00000350721.4:c.6618del	ENSP00000343741.4:p.Lys2206AsnfsTer3	6740	6618	2206	K/X	aaA/aa	-	-	-1	-	HGNC	882	YES	-	-	-	CCDS3124.1	ENSP00000343741	Q13535	-	UPI0000031A31	-	-	hmmpanther:PTHR11139,hmmpanther:PTHR11139:SF64,Superfamily_domains:SSF48371	-
991	3	chr3:142269112	ATR	G	C	0.005556	0	1	89	0.01111	0.01105	1	3:142269112-142269112	G	missense_variant	MODERATE	ATR	ENSG00000175054	Transcript	ENST00000350721.4	protein_coding	14/47	-	ENST00000350721.4:c.2838G>C	ENSP00000343741.4:p.Met946Ile	2960	2838	946	M/I	atG/atC	-	-	-1	-	HGNC	882	YES	-	-	-	CCDS3124.1	ENSP00000343741	Q13535	-	UPI0000031A31	tolerated(0.32)	benign(0)	hmmpanther:PTHR11139,hmmpanther:PTHR11139:SF64,Gene3D:1.25.10.10,Superfamily_domains:SSF48371	-
994	3	chr3:142272647	ATR	A	T	0.01111	0	2	88	0.02222	0.02198	1	3:142272647-142272647	A	intron_variant	MODIFIER	ATR	ENSG00000175054	Transcript	ENST00000350721.4	protein_coding	-	11/46	ENST00000350721.4:c.2532+20A>T	-	-	-	-	-	-	-	-	-1	-	HGNC	882	YES	-	-	-	CCDS3124.1	ENSP00000343741	Q13535	-	UPI0000031A31	-	-	-	-
995	3	chr3:142274652	ATR	A	C	0.005556	0	1	89	0.01111	0.01105	1	3:142274652-142274652	A	intron_variant	MODIFIER	ATR	ENSG00000175054	Transcript	ENST00000350721.4	protein_coding	-	10/46	ENST00000350721.4:c.2341+67G>T	-	-	-	-	-	-	-	-	-1	-	HGNC	882	YES	-	-	-	CCDS3124.1	ENSP00000343741	Q13535	-	UPI0000031A31	-	-	-	-
4236	23	chrX:76849165	ATRX	T	C	0.008	0	1	34	0.02857	0.02816	1	X:76849165-76849165	T	splice_donor_variant	HIGH	ATRX	ENSG00000085224	Transcript	ENST00000373344.5	protein_coding	-	26/34	ENST00000373344.5:c.6110+1G>A	-	-	-	-	-	-	-	-	-1	-	HGNC	886	YES	-	-	-	CCDS14434.1	ENSP00000362441	P46100	B4DLE1	UPI0000161F78	-	-	-	-
4046	20	chr20:54959349	AURKA	T	-	0.005556	0	1	89	0.01111	0.01105	1	20:54959348-54959348	T	frameshift_variant	HIGH	AURKA	ENSG00000087586	Transcript	ENST00000395909.4	protein_coding	6/11	-	ENST00000395909.4:c.351dup	ENSP00000379245.4:p.Gln118ThrfsTer4	917-918	351-352	117-118	-/X	-/A	-	-	-1	-	HGNC	11393	YES	-	-	-	CCDS13451.1	ENSP00000379245	O14965	Q5QPD4,Q5QPD2,Q5QPD1,A3KFJ2,A3KFJ1	UPI000013C70F	-	-	hmmpanther:PTHR24350,hmmpanther:PTHR24350:SF5,Gene3D:3.30.200.20	-
3586	17	chr17:8109871	AURKB	C	T	0.005556	0	1	89	0.01111	0.01105	1	17:8109871-8109871	C	synonymous_variant	LOW	AURKB	ENSG00000178999	Transcript	ENST00000585124.1	protein_coding	7/9	-	ENST00000585124.1:c.624A>G	ENSP00000463999.1:p.Leu208%3D	718	624	208	L	ttA/ttG	-	-	-1	-	HGNC	11390	YES	-	-	-	CCDS11134.1	ENSP00000463999	Q96GD4	J3QR41,J3KTD6,J3KRJ2	UPI000013FD00	-	-	Gene3D:1.10.510.10,Pfam_domain:PF00069,PROSITE_patterns:PS00108,PROSITE_profiles:PS50011,hmmpanther:PTHR24350,hmmpanther:PTHR24350:SF4,SMART_domains:SM00220,Superfamily_domains:SSF56112,Low_complexity_(Seg):seg	-
3999	19	chr19:57744792	AURKC	T	C	0.005556	0	1	89	0.01111	0.01105	1	19:57744792-57744792	T	intron_variant	MODIFIER	AURKC	ENSG00000105146	Transcript	ENST00000302804.7	protein_coding	-	4/6	ENST00000302804.7:c.436-36C>T	-	-	-	-	-	-	-	-	1	-	HGNC	11391	YES	-	-	-	CCDS33128.1	ENSP00000302898	Q9UQB9	-	UPI000013610A	-	-	-	-
1601	6	chr6:69349192	BAI3	A	G	0.005556	0	1	89	0.01111	0.01105	1	6:69349192-69349192	A	missense_variant	MODERATE	BAI3	ENSG00000135298	Transcript	ENST00000370598.1	protein_coding	3/32	-	ENST00000370598.1:c.625G>A	ENSP00000359630.1:p.Asp209Asn	1446	625	209	D/N	Gac/Aac	-	-	1	-	HGNC	945	YES	-	-	-	CCDS4968.1	ENSP00000359630	O60242	S4R3D0,B7Z1K0	UPI00001AE6A9	tolerated(0.42)	benign(0.114)	-	-
1615	6	chr6:70071243	BAI3	G	A	0.005556	0	1	89	0.01111	0.01105	1	6:70071243-70071243	G	missense_variant	MODERATE	BAI3	ENSG00000135298	Transcript	ENST00000370598.1	protein_coding	29/32	-	ENST00000370598.1:c.4078A>G	ENSP00000359630.1:p.Asn1360Asp	4899	4078	1360	N/D	Aat/Gat	-	-	1	-	HGNC	945	YES	-	-	-	CCDS4968.1	ENSP00000359630	O60242	S4R3D0,B7Z1K0	UPI00001AE6A9	tolerated(0.11)	benign(0.014)	-	-
111	1	chr1:85733370	BCL10	C	A	0.005556	0	1	89	0.01111	0.01105	1	1:85733370-85733370	C	synonymous_variant	LOW	BCL10	ENSG00000142867	Transcript	ENST00000370580.1	protein_coding	3/3	-	ENST00000370580.1:c.642T>G	ENSP00000359612.1:p.Thr214%3D	1380	642	214	T	acT/acG	-	-	-1	-	HGNC	989	YES	-	-	-	CCDS704.1	ENSP00000359612	O95999	-	UPI000012682F	-	-	-	-
113	1	chr1:85736596	BCL10	T	G	0.005556	0	1	89	0.01111	0.01105	1	1:85736596-85736596	T	splice_region_variant,intron_variant	LOW	BCL10	ENSG00000142867	Transcript	ENST00000370580.1	protein_coding	-	1/2	ENST00000370580.1:c.58-7C>A	-	-	-	-	-	-	-	-	-1	-	HGNC	989	YES	-	-	-	CCDS704.1	ENSP00000359612	O95999	-	UPI000012682F	-	-	-	-
558	2	chr2:60773062	BCL11A	G	A	0.005556	0	1	89	0.01111	0.01105	1	2:60773062-60773062	G	intron_variant	MODIFIER	BCL11A	ENSG00000119866	Transcript	ENST00000335712.6	protein_coding	-	2/3	ENST00000335712.6:c.385+44T>C	-	-	-	-	-	-	-	-	-1	-	HGNC	13221	YES	-	-	-	CCDS1862.1	ENSP00000338774	Q9H165	D6W5D9,Q53TS1,Q53TE8	UPI000013DC00	-	-	-	-
1030	3	chr3:187447019	BCL6	A	G	0.005556	0	1	89	0.01111	0.01105	1	3:187447019-187447019	A	missense_variant	MODERATE	BCL6	ENSG00000113916	Transcript	ENST00000406870.2	protein_coding	5/10	-	ENST00000406870.2:c.1174C>T	ENSP00000384371.2:p.Pro392Ser	1541	1174	392	P/S	Cca/Tca	-	-	-1	-	HGNC	1001	YES	-	-	-	CCDS3289.1	ENSP00000384371	P41182	C9JL16,C9JCS5	UPI000012682C	tolerated(0.47)	benign(0)	hmmpanther:PTHR23228,hmmpanther:PTHR23228:SF88	-
293	1	chr1:147090697	BCL9	T	C	0.005556	0	1	89	0.01111	0.01105	1	1:147090697-147090697	T	stop_gained	HIGH	BCL9	ENSG00000116128	Transcript	ENST00000234739.3	protein_coding	8/10	-	ENST00000234739.3:c.736C>T	ENSP00000234739.3:p.Gln246Ter	1476	736	246	Q/*	Cag/Tag	-	-	1	-	HGNC	1008	YES	-	-	-	CCDS30833.1	ENSP00000234739	O00512	-	UPI000013C9B9	-	-	hmmpanther:PTHR15185,hmmpanther:PTHR15185:SF5,Low_complexity_(Seg):seg	-
298	1	chr1:147094034	BCL9	T	A	0.005556	0	1	89	0.01111	0.01105	1	1:147094034-147094034	T	intron_variant	MODIFIER	BCL9	ENSG00000116128	Transcript	ENST00000234739.3	protein_coding	-	8/9	ENST00000234739.3:c.2903-38A>T	-	-	-	-	-	-	-	-	1	-	HGNC	1008	YES	-	-	-	CCDS30833.1	ENSP00000234739	O00512	-	UPI000013C9B9	-	-	-	-
2793	11	chr11:102195293	BIRC3	C	A	0.005556	0	1	89	0.01111	0.01105	1	11:102195293-102195293	C	missense_variant	MODERATE	BIRC3	ENSG00000023445	Transcript	ENST00000263464.3	protein_coding	2/9	-	ENST00000263464.3:c.53A>C	ENSP00000263464.3:p.Asn18Thr	2803	53	18	N/T	aAc/aCc	-	-	1	-	HGNC	591	YES	-	-	-	CCDS8315.1	ENSP00000263464	Q13489	-	UPI0000001C60	tolerated(0.54)	benign(0.065)	Gene3D:1.10.1170.10,hmmpanther:PTHR10044	-
2795	11	chr11:102195716	BIRC3	T	G	0.005556	0	1	89	0.01111	0.01105	1	11:102195716-102195716	T	missense_variant	MODERATE	BIRC3	ENSG00000023445	Transcript	ENST00000263464.3	protein_coding	2/9	-	ENST00000263464.3:c.476G>T	ENSP00000263464.3:p.Arg159Ile	3226	476	159	R/I	aGa/aTa	-	-	1	-	HGNC	591	YES	-	-	-	CCDS8315.1	ENSP00000263464	Q13489	-	UPI0000001C60	tolerated(0.47)	benign(0)	Gene3D:1.10.1170.10,hmmpanther:PTHR10044	-
2796	11	chr11:102201890	BIRC3	C	T	0.005556	0	1	89	0.01111	0.01105	1	11:102201890-102201890	C	synonymous_variant	LOW	BIRC3	ENSG00000023445	Transcript	ENST00000263464.3	protein_coding	6/9	-	ENST00000263464.3:c.1242T>C	ENSP00000263464.3:p.Asn414%3D	3992	1242	414	N	aaT/aaC	-	-	1	-	HGNC	591	YES	-	-	-	CCDS8315.1	ENSP00000263464	Q13489	-	UPI0000001C60	-	-	Coiled-coils_(Ncoils):Coil,hmmpanther:PTHR10044,Low_complexity_(Seg):seg	-
2797	11	chr11:102207645	BIRC3	A	C	0.01111	0	2	88	0.02222	0.02198	1	11:102207645-102207645	A	missense_variant	MODERATE	BIRC3	ENSG00000023445	Transcript	ENST00000263464.3	protein_coding	9/9	-	ENST00000263464.3:c.1627C>A	ENSP00000263464.3:p.Pro543Thr	4377	1627	543	P/T	Cca/Aca	-	-	1	-	HGNC	591	YES	-	-	-	CCDS8315.1	ENSP00000263464	Q13489	-	UPI0000001C60	tolerated(0.07)	benign(0.271)	hmmpanther:PTHR10044,Superfamily_domains:SSF57924	-
2798	11	chr11:102207653	BIRC3	C	A	0.005556	0	1	89	0.01111	0.01105	1	11:102207653-102207653	C	missense_variant	MODERATE	BIRC3	ENSG00000023445	Transcript	ENST00000263464.3	protein_coding	9/9	-	ENST00000263464.3:c.1635A>C	ENSP00000263464.3:p.Glu545Asp	4385	1635	545	E/D	gaA/gaC	-	-	1	-	HGNC	591	YES	-	-	-	CCDS8315.1	ENSP00000263464	Q13489	-	UPI0000001C60	deleterious(0)	probably_damaging(0.985)	hmmpanther:PTHR10044,Superfamily_domains:SSF57924,Low_complexity_(Seg):seg	-
3719	17	chr17:76210389	BIRC5	A	G	0.005556	0	1	89	0.01111	0.01105	1	17:76210389-76210389	A	5_prime_UTR_variant	MODIFIER	BIRC5	ENSG00000089685	Transcript	ENST00000301633.4	protein_coding	1/5	-	ENST00000301633.4:c.-9G>A	-	123	-	-	-	-	-	-	1	-	HGNC	593	YES	-	-	-	CCDS32752.1	ENSP00000301633	-	H3BLT4	UPI000013F77A	-	-	-	-
3722	17	chr17:76219645	BIRC5	T	C	0.02778	0	5	85	0.05556	0.05401	1	17:76219645-76219645	T	3_prime_UTR_variant	MODIFIER	BIRC5	ENSG00000089685	Transcript	ENST00000301633.4	protein_coding	5/5	-	ENST00000301633.4:c.*10C>T	-	639	-	-	-	-	-	-	1	-	HGNC	593	YES	-	-	-	CCDS32752.1	ENSP00000301633	-	H3BLT4	UPI000013F77A	-	-	-	-
3291	15	chr15:91304145	BLM	T	A	0.01111	0	2	88	0.02222	0.02198	1	15:91304145-91304145	T	missense_variant	MODERATE	BLM	ENSG00000197299	Transcript	ENST00000355112.3	protein_coding	7/22	-	ENST00000355112.3:c.1542A>T	ENSP00000347232.3:p.Lys514Asn	1660	1542	514	K/N	aaA/aaT	-	-	1	-	HGNC	1058	YES	-	-	-	CCDS10363.1	ENSP00000347232	P54132	-	UPI00001269FA	tolerated(0.13)	benign(0.007)	-	-
3299	15	chr15:91347493	BLM	A	C	0.005556	0	1	89	0.01111	0.01105	1	15:91347493-91347493	A	missense_variant	MODERATE	BLM	ENSG00000197299	Transcript	ENST00000355112.3	protein_coding	19/22	-	ENST00000355112.3:c.3655C>A	ENSP00000347232.3:p.Leu1219Ile	3773	3655	1219	L/I	Ctt/Att	-	-	1	-	HGNC	1058	YES	-	-	-	CCDS10363.1	ENSP00000347232	P54132	-	UPI00001269FA	deleterious(0.01)	benign(0.18)	PROSITE_profiles:PS50967,hmmpanther:PTHR13710,hmmpanther:PTHR13710:SF70,Gene3D:1.10.150.80,Pfam_domain:PF00570,SMART_domains:SM00341,Superfamily_domains:SSF47819	-
2657	10	chr10:97975168	BLNK	-	TA	0.03333	0	6	84	0.06667	0.06444	1	10:97975167-97975169	-	intron_variant	MODIFIER	BLNK	ENSG00000095585	Transcript	ENST00000224337.5	protein_coding	-	2020-07-16	ENST00000224337.5:c.608-24_608-23del	-	-	-	-	-	-	-	-	-1	-	HGNC	14211	YES	-	-	-	CCDS7446.1	ENSP00000224337	Q8WV28	Q2MD56	UPI000006FDD6	-	-	-	-
3691	17	chr17:59760648	BRIP1	C	T	0.005556	0	1	89	0.01111	0.01105	1	17:59760648-59760648	C	3_prime_UTR_variant	MODIFIER	BRIP1	ENSG00000136492	Transcript	ENST00000259008.2	protein_coding	20/20	-	ENST00000259008.2:c.*9A>G	-	4027	-	-	-	-	-	-	-1	-	HGNC	20473	YES	-	-	-	CCDS11631.1	ENSP00000259008	Q9BX63	J3KS24	UPI000013D01F	-	-	-	-
3697	17	chr17:59858190	BRIP1	T	G	0.005556	0	1	89	0.01111	0.01105	1	17:59858190-59858190	T	intron_variant	MODIFIER	BRIP1	ENSG00000136492	Transcript	ENST00000259008.2	protein_coding	-	12/19	ENST00000259008.2:c.1794+11C>A	-	-	-	-	-	-	-	-	-1	-	HGNC	20473	YES	-	-	-	CCDS11631.1	ENSP00000259008	Q9BX63	J3KS24	UPI000013D01F	-	-	-	-
3698	17	chr17:59861596	BRIP1	A	T	0.005556	0	1	89	0.01111	0.01105	1	17:59861596-59861596	A	intron_variant	MODIFIER	BRIP1	ENSG00000136492	Transcript	ENST00000259008.2	protein_coding	-	11/19	ENST00000259008.2:c.1628+35A>T	-	-	-	-	-	-	-	-	-1	-	HGNC	20473	YES	-	-	-	CCDS11631.1	ENSP00000259008	Q9BX63	J3KS24	UPI000013D01F	-	-	-	-
1855	7	chr7:2968269	CARD11	C	T	0.005556	0	1	89	0.01111	0.01105	1	7:2968269-2968269	C	missense_variant	MODERATE	CARD11	ENSG00000198286	Transcript	ENST00000396946.4	protein_coding	13/25	-	ENST00000396946.4:c.1717A>G	ENSP00000380150.4:p.Ile573Val	2121	1717	573	I/V	Atc/Gtc	-	-	-1	-	HGNC	16393	YES	-	-	-	CCDS5336.2	ENSP00000380150	Q9BXL7	Q8TES3,E2QRC0	UPI00003FED38	tolerated(0.11)	benign(0.13)	hmmpanther:PTHR14559,hmmpanther:PTHR14559:SF10	-
3230	15	chr15:40913884	CASC5	T	G	0.005556	0	1	89	0.01111	0.01105	1	15:40913884-40913884	T	missense_variant	MODERATE	CASC5	ENSG00000137812	Transcript	ENST00000346991.5	protein_coding	11/27	-	ENST00000346991.5:c.1500G>T	ENSP00000335463.6:p.Glu500Asp	1890	1500	500	E/D	gaG/gaT	-	-	1	-	HGNC	24054	YES	-	-	-	CCDS42023.1	ENSP00000335463	Q8NG31	-	UPI0000E59BD3	tolerated(0.28)	benign(0.114)	hmmpanther:PTHR16520,hmmpanther:PTHR16520:SF2	-
3244	15	chr15:40949531	CASC5	-	TTTT	0.005556	0	1	89	0.01111	0.01105	1	15:40949530-40949534	-	intron_variant	MODIFIER	CASC5	ENSG00000137812	Transcript	ENST00000346991.5	protein_coding	-	24/26	ENST00000346991.5:c.6673-18_6673-15del	-	-	-	-	-	-	-	-	1	-	HGNC	24054	YES	-	-	-	CCDS42023.1	ENSP00000335463	Q8NG31	-	UPI0000E59BD3	-	-	-	4
2849	11	chr11:119145464	CBL	-	TT	0.005556	0	1	89	0.01111	0.01105	1	11:119145463-119145465	-	intron_variant	MODIFIER	CBL	ENSG00000110395	Transcript	ENST00000264033.4	protein_coding	-	2020-04-15	ENST00000264033.4:c.748-68_748-67del	-	-	-	-	-	-	-	-	1	-	HGNC	1541	YES	-	-	-	CCDS8418.1	ENSP00000264033	P22681	-	UPI000013D4A7	-	-	-	10
391	1	chr1:193110968	CDC73	G	A	0.005556	0	1	89	0.01111	0.01105	1	1:193110968-193110968	G	intron_variant	MODIFIER	CDC73	ENSG00000134371	Transcript	ENST00000367435.3	protein_coding	-	6/16	ENST00000367435.3:c.513-12A>G	-	-	-	-	-	-	-	-	1	-	HGNC	16783	YES	-	-	-	CCDS1382.1	ENSP00000356405	Q6P1J9	-	UPI0000021592	-	-	-	-
393	1	chr1:193111251	CDC73	A	G	0.005556	0	1	89	0.01111	0.01105	1	1:193111251-193111251	A	intron_variant	MODIFIER	CDC73	ENSG00000134371	Transcript	ENST00000367435.3	protein_coding	-	7/16	ENST00000367435.3:c.729+55G>A	-	-	-	-	-	-	-	-	1	-	HGNC	16783	YES	-	-	-	CCDS1382.1	ENSP00000356405	Q6P1J9	-	UPI0000021592	-	-	-	-
3462	16	chr16:68844081	CDH1	T	C	0.005556	0	1	89	0.01111	0.01105	1	16:68844081-68844081	T	intron_variant	MODIFIER	CDH1	ENSG00000039068	Transcript	ENST00000261769.5	protein_coding	-	5/15	ENST00000261769.5:c.688-19C>T	-	-	-	-	-	-	-	-	1	-	HGNC	1748	YES	-	-	-	CCDS10869.1	ENSP00000261769	P12830	B3GN61	UPI00000341EF	-	-	-	-
3448	16	chr16:65026991	CDH11	G	T	0.005556	0	1	89	0.01111	0.01105	1	16:65026991-65026991	G	intron_variant	MODIFIER	CDH11	ENSG00000140937	Transcript	ENST00000268603.4	protein_coding	-	4/12	ENST00000268603.4:c.524-54A>C	-	-	-	-	-	-	-	-	-1	-	HGNC	1750	YES	-	-	-	CCDS10803.1	ENSP00000268603	P55287	H3BUU9,H3BSM4,H3BR78,H3BQH2,H3BQB5,H3BPQ2,H3BP26	UPI000013D7C5	-	-	-	-
3801	18	chr18:25589869	CDH2	A	G	0.005556	0	1	89	0.01111	0.01105	1	18:25589869-25589869	A	intron_variant	MODIFIER	CDH2	ENSG00000170558	Transcript	ENST00000269141.3	protein_coding	-	4/15	ENST00000269141.3:c.547-33C>T	-	-	-	-	-	-	-	-	-1	-	HGNC	1759	YES	-	-	-	CCDS11891.1	ENSP00000269141	P19022	C9JMH2,C9J126	UPI000013D7FD	-	-	-	-
3804	18	chr18:25593716	CDH2	A	C	0.005556	0	1	89	0.01111	0.01105	1	18:25593716-25593716	A	missense_variant	MODERATE	CDH2	ENSG00000170558	Transcript	ENST00000269141.3	protein_coding	3/16	-	ENST00000269141.3:c.330G>T	ENSP00000269141.3:p.Glu110Asp	754	330	110	E/D	gaG/gaT	-	-	-1	-	HGNC	1759	YES	-	-	-	CCDS11891.1	ENSP00000269141	P19022	C9JMH2,C9J126	UPI000013D7FD	tolerated(0.46)	benign(0)	hmmpanther:PTHR24027:SF79,hmmpanther:PTHR24027,Pfam_domain:PF08758,Gene3D:2.60.40.60,SMART_domains:SM01055,Superfamily_domains:SSF49313	-
3857	18	chr18:59221876	CDH20	A	G	0.02778	0	5	85	0.05556	0.05401	1	18:59221876-59221876	A	missense_variant	MODERATE	CDH20	ENSG00000101542	Transcript	ENST00000262717.4	protein_coding	12/12	-	ENST00000262717.4:c.2354G>A	ENSP00000262717.3:p.Arg785Gln	2752	2354	785	R/Q	cGg/cAg	-	-	1	-	HGNC	1760	YES	-	-	-	CCDS11977.1	ENSP00000262717	Q9HBT6	Q8N9J3,K7ESP2	UPI000013D30D	tolerated(0.2)	benign(0.023)	Gene3D:4.10.900.10,Pfam_domain:PF01049,hmmpanther:PTHR24027,hmmpanther:PTHR24027:SF84	-
3617	17	chr17:37627782	CDK12	G	T	0.005556	0	1	89	0.01111	0.01105	1	17:37627782-37627782	G	missense_variant	MODERATE	CDK12	ENSG00000167258	Transcript	ENST00000447079.4	protein_coding	2/14	-	ENST00000447079.4:c.1697T>G	ENSP00000398880.3:p.Leu566Arg	1730	1697	566	L/R	cTg/cGg	-	-	1	-	HGNC	24224	YES	-	-	-	CCDS11337.1	ENSP00000398880	Q9NYV4	-	UPI000013E688	tolerated_low_confidence(0.1)	benign(0.188)	Low_complexity_(Seg):seg	-
2960	12	chr12:58143112	CDK4	-	AGG	0.005556	0	1	89	0.01111	0.01105	1	12:58143111-58143114	-	intron_variant	MODIFIER	CDK4	ENSG00000135446	Transcript	ENST00000257904.6	protein_coding	-	6/7	ENST00000257904.6:c.684-14_684-12del	-	-	-	-	-	-	-	-	-1	-	HGNC	1773	YES	-	-	-	CCDS8953.1	ENSP00000257904	P11802	Q6LC83,F8W1L8,F8VZZ0,F8VZ51,F8VZ13,F8VYH9,F8VXD2,F8VWX7,B4DNF9	UPI0000113582	-	-	-	-
2403	9	chr9:21994158	CDKN2A	C	T	0.005556	0	1	89	0.01111	0.01105	1	9:21994158-21994158	C	intron_variant,NMD_transcript_variant	MODIFIER	RP11-145E5.5	ENSG00000264545	Transcript	ENST00000404796.2	nonsense_mediated_decay	-	4/5	ENST00000404796.2:c.348-35274T>C	-	-	-	-	-	-	-	-	1	-	Clone_based_vega_gene	-	YES	-	-	-	-	ENSP00000385916	-	F2Z2F3	UPI000045890F	-	-	-	-
3961	19	chr19:42791062	CIC	T	C	0.005556	0	1	89	0.01111	0.01105	1	19:42791062-42791062	T	synonymous_variant	LOW	CIC	ENSG00000079432	Transcript	ENST00000575354.2	protein_coding	2/20	-	ENST00000575354.2:c.207C>T	ENSP00000458663.2:p.Asn69%3D	247	207	69	N	aaC/aaT	-	-	1	-	HGNC	14214	YES	-	-	-	CCDS12601.1	ENSP00000458663	Q96RK0	-	UPI000013C5A0	-	-	hmmpanther:PTHR13059,hmmpanther:PTHR13059:SF11	-
3965	19	chr19:42798455	CIC	G	A	0.005556	0	1	89	0.01111	0.01105	1	19:42798455-42798455	G	splice_region_variant,synonymous_variant	LOW	CIC	ENSG00000079432	Transcript	ENST00000575354.2	protein_coding	18/20	-	ENST00000575354.2:c.4326A>G	ENSP00000458663.2:p.Thr1442%3D	4366	4326	1442	T	acA/acG	-	-	1	-	HGNC	14214	YES	-	-	-	CCDS12601.1	ENSP00000458663	Q96RK0	-	UPI000013C5A0	-	-	hmmpanther:PTHR13059,hmmpanther:PTHR13059:SF11	-
3689	17	chr17:48277061	COL1A1	-	CCCCAGGCCCCAGGCCCCAGG	0.01667	1	1	88	0.01111	0.03278	0.01676	17:48277060-48277081	-	intron_variant	MODIFIER	COL1A1	ENSG00000108821	Transcript	ENST00000225964.5	protein_coding	-	1950-02-01	ENST00000225964.5:c.298+34_298+54del	-	-	-	-	-	-	-	-	-1	-	HGNC	2197	YES	-	-	-	CCDS11561.1	ENSP00000225964	P02452	Q9UMA6,Q6LAN8	UPI000013C88B	-	-	-	-1
763	3	chr3:3194271	CRBN	C	A	0.005556	0	1	89	0.01111	0.01105	1	3:3194271-3194271	C	missense_variant,splice_region_variant	MODERATE	CRBN	ENSG00000113851	Transcript	ENST00000231948.4	protein_coding	10/11	-	ENST00000231948.4:c.1017T>G	ENSP00000231948.4:p.Ser339Arg	1040	1017	339	S/R	agT/agG	-	-	-1	-	HGNC	30185	YES	-	-	-	CCDS2562.1	ENSP00000231948	Q96SW2	-	UPI000006E62A	deleterious(0.02)	benign(0.007)	hmmpanther:PTHR14255,hmmpanther:PTHR14255:SF2	-
766	3	chr3:3197988	CRBN	G	C	0.005556	0	1	89	0.01111	0.01105	1	3:3197988-3197988	G	intron_variant	MODIFIER	CRBN	ENSG00000113851	Transcript	ENST00000231948.4	protein_coding	-	5/10	ENST00000231948.4:c.688-23G>C	-	-	-	-	-	-	-	-	-1	-	HGNC	30185	YES	-	-	-	CCDS2562.1	ENSP00000231948	Q96SW2	-	UPI000006E62A	-	-	-	-
3360	16	chr16:3843610	CREBBP	G	T	0.005556	0	1	89	0.01111	0.01105	1	16:3843610-3843610	G	synonymous_variant	LOW	CREBBP	ENSG00000005339	Transcript	ENST00000262367.5	protein_coding	4/31	-	ENST00000262367.5:c.993A>C	ENSP00000262367.5:p.Ser331%3D	1803	993	331	S	tcA/tcC	-	-	-1	-	HGNC	2348	YES	-	-	-	CCDS10509.1	ENSP00000262367	Q92793	Q75MY6,I3L3I5,B5A253,B5A252,B5A250,B5A246,B5A244,B5A243,B5A242,B5A240,B5A239,B5A235,B5A231,B5A227,B5A226,B5A222,B5A221,B5A219,B5A218,B5A216,B5A215,B5A214,B5A212	UPI0000000620	-	-	hmmpanther:PTHR13808,hmmpanther:PTHR13808:SF5	-
2291	8	chr8:113254080	CSMD3	-	CACACACG	0.01111	0	2	88	0.02222	0.02198	1	8:113254079-113254087	-	intron_variant	MODIFIER	CSMD3	ENSG00000164796	Transcript	ENST00000297405.5	protein_coding	-	65/70	ENST00000297405.5:c.10403-73_10403-66del	-	-	-	-	-	-	-	-	-1	-	HGNC	19291	YES	-	-	-	CCDS6315.1	ENSP00000297405	Q7Z407	-	UPI00001E0584	-	-	-	-
2296	8	chr8:113301795	CSMD3	TTA	ATT	0.005556	0	1	89	0.01111	0.01105	1	8:113301795-113301797	TTA	intron_variant	MODIFIER	CSMD3	ENSG00000164796	Transcript	ENST00000297405.5	protein_coding	-	56/70	ENST00000297405.5:c.8975-30_8975-28delinsTAA	-	-	-	-	-	-	-	-	-1	-	HGNC	19291	YES	-	-	-	CCDS6315.1	ENSP00000297405	Q7Z407	-	UPI00001E0584	-	-	-	-
2302	8	chr8:113323397	CSMD3	G	T	0.005556	0	1	89	0.01111	0.01105	1	8:113323397-113323397	G	splice_acceptor_variant	HIGH	CSMD3	ENSG00000164796	Transcript	ENST00000297405.5	protein_coding	-	49/70	ENST00000297405.5:c.7697-2A>C	-	-	-	-	-	-	-	-	-1	-	HGNC	19291	YES	-	-	-	CCDS6315.1	ENSP00000297405	Q7Z407	-	UPI00001E0584	-	-	-	-
2311	8	chr8:113516216	CSMD3	G	A	0.01667	0	3	87	0.03333	0.03278	1	8:113516216-113516216	G	intron_variant	MODIFIER	CSMD3	ENSG00000164796	Transcript	ENST00000297405.5	protein_coding	-	29/70	ENST00000297405.5:c.4896-10T>C	-	-	-	-	-	-	-	-	-1	-	HGNC	19291	YES	-	-	-	CCDS6315.1	ENSP00000297405	Q7Z407	-	UPI00001E0584	-	-	-	-
2313	8	chr8:113568949	CSMD3	G	T	0.005556	0	1	89	0.01111	0.01105	1	8:113568949-113568949	G	intron_variant	MODIFIER	CSMD3	ENSG00000164796	Transcript	ENST00000297405.5	protein_coding	-	25/70	ENST00000297405.5:c.4234+43A>C	-	-	-	-	-	-	-	-	-1	-	HGNC	19291	YES	-	-	-	CCDS6315.1	ENSP00000297405	Q7Z407	-	UPI00001E0584	-	-	-	-
1340	5	chr5:138266523	CTNNA1	G	A	0.005556	0	1	89	0.01111	0.01105	1	5:138266523-138266523	G	missense_variant	MODERATE	CTNNA1	ENSG00000044115	Transcript	ENST00000302763.7	protein_coding	16/18	-	ENST00000302763.7:c.2197A>G	ENSP00000304669.7:p.Lys733Glu	2287	2197	733	K/E	Aaa/Gaa	-	-	1	-	HGNC	2509	YES	-	-	-	CCDS34243.1	ENSP00000304669	P35221	F8W845,E5RJP7,E5RJL0,E5RJC9,E5RJ43,E5RJ41,E5RIE0,E5RIB1,E5RHY5,E5RHV7,E5RHR7,E5RHJ5,E5RGY6,E5RGU3,E5RGS1,E5RGG4,E5RGD2,E5RG03,E5RFM5,E5RFM3,E5RFK9,E5RFG3,B4E2G8,B4DKT9	UPI000012862C	tolerated(0.06)	benign(0.062)	hmmpanther:PTHR18914,hmmpanther:PTHR18914:SF24,Gene3D:1.20.120.230,Pfam_domain:PF01044,Superfamily_domains:SSF47220,Prints_domain:PR00805	-
1343	5	chr5:138269717	CTNNA1	-	AGA	0.005556	0	1	89	0.01111	0.01105	1	5:138269716-138269719	-	inframe_deletion	MODERATE	CTNNA1	ENSG00000044115	Transcript	ENST00000302763.7	protein_coding	18/18	-	ENST00000302763.7:c.2665_2667del	ENSP00000304669.7:p.Lys889del	2750-2752	2660-2662	887-888	QK/Q	cAGAag/cag	-	-	1	-	HGNC	2509	YES	-	-	-	CCDS34243.1	ENSP00000304669	P35221	F8W845,E5RJP7,E5RJL0,E5RJC9,E5RJ43,E5RJ41,E5RIE0,E5RIB1,E5RHY5,E5RHV7,E5RHR7,E5RHJ5,E5RGY6,E5RGU3,E5RGS1,E5RGG4,E5RGD2,E5RG03,E5RFM5,E5RFM3,E5RFK9,E5RFG3,B4E2G8,B4DKT9	UPI000012862C	-	-	hmmpanther:PTHR18914,hmmpanther:PTHR18914:SF24	5
853	3	chr3:41267196	CTNNB1	A	C	0.005556	0	1	89	0.01111	0.01105	1	3:41267196-41267196	A	missense_variant	MODERATE	CTNNB1	ENSG00000168036	Transcript	ENST00000349496.5	protein_coding	6/15	-	ENST00000349496.5:c.780C>A	ENSP00000344456.5:p.His260Gln	1060	780	260	H/Q	caC/caA	-	-	1	-	HGNC	2514	YES	-	-	-	CCDS2694.1	ENSP00000344456	P35222	G9GAG7,E9PDF9,E7EV28,E7EMJ5,C9IZ65,B4DGU4	UPI000012862F	deleterious(0)	probably_damaging(0.996)	Gene3D:1.25.10.10,Pfam_domain:PF00514,PROSITE_profiles:PS50176,hmmpanther:PTHR23315,hmmpanther:PTHR23315:SF53,SMART_domains:SM00185,Superfamily_domains:SSF48371	-
2651	10	chr10:96541627	CYP2C19	G	A	0.005556	0	1	89	0.01111	0.01105	1	10:96541627-96541627	G	missense_variant	MODERATE	CYP2C19	ENSG00000165841	Transcript	ENST00000371321.3	protein_coding	5/9	-	ENST00000371321.3:c.692A>G	ENSP00000360372.3:p.Asn231Ser	774	692	231	N/S	aAc/aGc	-	-	1	-	HGNC	2621	YES	-	-	-	CCDS7436.1	ENSP00000360372	P33261	-	UPI000013DE1E	tolerated(0.11)	benign(0.007)	Gene3D:1.10.630.10,Pfam_domain:PF00067,hmmpanther:PTHR24300,hmmpanther:PTHR24300:SF131,Superfamily_domains:SSF48264	-
4176	22	chr22:42524893	CYP2D6	T	C	0.005556	0	1	89	0.01111	0.01105	1	22:42524893-42524893	T	missense_variant	MODERATE	CYP2D6	ENSG00000100197	Transcript	ENST00000360608.5	protein_coding	4/9	-	ENST00000360608.5:c.559G>A	ENSP00000353820.5:p.Ala187Thr	674	559	187	A/T	Gcc/Acc	-	-	-1	-	HGNC	2625	YES	-	-	-	CCDS46721.1	ENSP00000353820	-	Q6NWU0,Q007T9	UPI0000157756	tolerated(0.05)	benign(0.08)	hmmpanther:PTHR24300,hmmpanther:PTHR24300:SF13,Gene3D:1.10.630.10,Pfam_domain:PF00067,Superfamily_domains:SSF48264,Prints_domain:PR01686,Prints_domain:PR00463	-
3830	18	chr18:50451642	DCC	G	T	0.005556	0	1	89	0.01111	0.01105	1	18:50451642-50451642	G	missense_variant	MODERATE	DCC	ENSG00000187323	Transcript	ENST00000442544.2	protein_coding	5/29	-	ENST00000442544.2:c.887T>G	ENSP00000389140.2:p.Leu296Arg	1503	887	296	L/R	cTt/cGt	-	-	1	-	HGNC	2701	YES	-	-	-	CCDS11952.1	ENSP00000389140	P43146	J3QQJ6	UPI00001AEDC6	tolerated(0.7)	benign(0.019)	Low_complexity_(Seg):seg,PROSITE_profiles:PS50835,hmmpanther:PTHR10489:SF68,hmmpanther:PTHR10489,Pfam_domain:PF07679,Gene3D:2.60.40.10,SMART_domains:SM00409,SMART_domains:SM00408,Superfamily_domains:SSF48726	-
3831	18	chr18:50451662	DCC	C	G	0.005556	0	1	89	0.01111	0.01105	1	18:50451662-50451662	C	missense_variant	MODERATE	DCC	ENSG00000187323	Transcript	ENST00000442544.2	protein_coding	5/29	-	ENST00000442544.2:c.907G>C	ENSP00000389140.2:p.Asp303His	1523	907	303	D/H	Gat/Cat	-	-	1	-	HGNC	2701	YES	-	-	-	CCDS11952.1	ENSP00000389140	P43146	J3QQJ6	UPI00001AEDC6	deleterious(0.01)	possibly_damaging(0.786)	PROSITE_profiles:PS50835,hmmpanther:PTHR10489:SF68,hmmpanther:PTHR10489,Pfam_domain:PF07679,Gene3D:2.60.40.10,SMART_domains:SM00409,SMART_domains:SM00408,Superfamily_domains:SSF48726	-
3844	18	chr18:50942526	DCC	T	G	0.005556	0	1	89	0.01111	0.01105	1	18:50942526-50942526	T	missense_variant,splice_region_variant	MODERATE	DCC	ENSG00000187323	Transcript	ENST00000442544.2	protein_coding	21/29	-	ENST00000442544.2:c.3163G>T	ENSP00000389140.2:p.Gly1055Cys	3779	3163	1055	G/C	Ggt/Tgt	-	-	1	-	HGNC	2701	YES	-	-	-	CCDS11952.1	ENSP00000389140	P43146	J3QQJ6	UPI00001AEDC6	deleterious(0)	possibly_damaging(0.894)	hmmpanther:PTHR10489:SF68,hmmpanther:PTHR10489	-
3845	18	chr18:50976845	DCC	C	A	0.005556	0	1	89	0.01111	0.01105	1	18:50976845-50976845	C	intron_variant	MODIFIER	DCC	ENSG00000187323	Transcript	ENST00000442544.2	protein_coding	-	22/28	ENST00000442544.2:c.3230-25A>C	-	-	-	-	-	-	-	-	1	-	HGNC	2701	YES	-	-	-	CCDS11952.1	ENSP00000389140	P43146	J3QQJ6	UPI00001AEDC6	-	-	-	-
341	1	chr1:162737153	DDR2	T	A	0.01111	0	2	88	0.02222	0.02198	1	1:162737153-162737153	T	splice_region_variant,intron_variant	LOW	DDR2	ENSG00000162733	Transcript	ENST00000367922.3	protein_coding	-	12/18	ENST00000367922.3:c.1293+4A>T	-	-	-	-	-	-	-	-	1	-	HGNC	2731	YES	-	-	-	CCDS1241.1	ENSP00000356899	Q16832	Q5T245,Q5T244	UPI000013E1B4	-	-	-	-
343	1	chr1:162740326	DDR2	CG	GT	0.01111	0	2	88	0.02222	0.02198	1	1:162740326-162740327	CG	intron_variant	MODIFIER	DDR2	ENSG00000162733	Transcript	ENST00000367922.3	protein_coding	-	13/18	ENST00000367922.3:c.1504+24_1504+25delinsCG	-	-	-	-	-	-	-	-	1	-	HGNC	2731	YES	-	-	-	CCDS1241.1	ENSP00000356899	Q16832	Q5T245,Q5T244	UPI000013E1B4	-	-	-	-
349	1	chr1:162748385	DDR2	T	G	0.005556	0	1	89	0.01111	0.01105	1	1:162748385-162748385	T	missense_variant	MODERATE	DDR2	ENSG00000162733	Transcript	ENST00000367922.3	protein_coding	18/19	-	ENST00000367922.3:c.2299G>T	ENSP00000356899.2:p.Ala767Ser	2737	2299	767	A/S	Gca/Tca	-	-	1	-	HGNC	2731	YES	-	-	-	CCDS1241.1	ENSP00000356899	Q16832	Q5T245,Q5T244	UPI000013E1B4	deleterious(0.02)	benign(0.364)	Gene3D:1.10.510.10,Pfam_domain:PF07714,PROSITE_profiles:PS50011,hmmpanther:PTHR24416,hmmpanther:PTHR24416:SF297,SMART_domains:SM00219,Superfamily_domains:SSF56112	-
3153	14	chr14:95569893	DICER1	A	G	0.005556	0	1	89	0.01111	0.01105	1	14:95569893-95569893	A	synonymous_variant	LOW	DICER1	ENSG00000100697	Transcript	ENST00000526495.1	protein_coding	23/29	-	ENST00000526495.1:c.3840C>T	ENSP00000437256.1:p.Ser1280%3D	4132	3840	1280	S	agC/agT	-	-	-1	-	HGNC	17098	YES	-	-	-	CCDS9931.1	ENSP00000437256	Q9UPY3	Q5D0K5,B3KMJ0	UPI0000168662	-	-	hmmpanther:PTHR14950,hmmpanther:PTHR14950:SF3	-
499	2	chr2:25457148	DNMT3A	G	T	0.005556	0	1	89	0.01111	0.01105	1	2:25457148-25457148	G	stop_lost	HIGH	DNMT3A	ENSG00000119772	Transcript	ENST00000264709.3	protein_coding	23/23	-	ENST00000264709.3:c.2739A>C	ENSP00000264709.3:p.Ter913TyrextTer13	3077	2739	913	*/Y	taA/taC	-	-	-1	-	HGNC	2978	YES	-	-	-	CCDS33157.1	ENSP00000264709	Q9Y6K1	Q8WVA9,Q6PJ37	UPI000000DA70	-	-	-	-
506	2	chr2:25523013	DNMT3A	A	G	0.005556	0	1	89	0.01111	0.01105	1	2:25523013-25523013	A	missense_variant	MODERATE	DNMT3A	ENSG00000119772	Transcript	ENST00000264709.3	protein_coding	3/23	-	ENST00000264709.3:c.172C>T	ENSP00000264709.3:p.Pro58Ser	510	172	58	P/S	Ccc/Tcc	-	-	-1	-	HGNC	2978	YES	-	-	-	CCDS33157.1	ENSP00000264709	Q9Y6K1	Q8WVA9,Q6PJ37	UPI000000DA70	tolerated_low_confidence(0.37)	probably_damaging(0.968)	hmmpanther:PTHR23068:SF10,hmmpanther:PTHR23068	-
119	1	chr1:97564040	DPYD	G	T	0.005556	0	1	89	0.01111	0.01105	1	1:97564040-97564040	G	splice_region_variant,intron_variant	LOW	DPYD	ENSG00000188641	Transcript	ENST00000370192.3	protein_coding	-	21/22	ENST00000370192.3:c.2766+5A>C	-	-	-	-	-	-	-	-	-1	-	HGNC	3012	YES	-	-	-	CCDS30777.1	ENSP00000359211	Q12882	-	UPI0000458949	-	-	-	-
128	1	chr1:98144767	DPYD	T	A	0.005556	0	1	89	0.01111	0.01105	1	1:98144767-98144767	T	intron_variant	MODIFIER	DPYD	ENSG00000188641	Transcript	ENST00000370192.3	protein_coding	-	7/22	ENST00000370192.3:c.763-29T>A	-	-	-	-	-	-	-	-	-1	-	HGNC	3012	YES	-	-	-	CCDS30777.1	ENSP00000359211	Q12882	-	UPI0000458949	-	-	-	-
133	1	chr1:98206046	DPYD	C	A	0.005556	0	1	89	0.01111	0.01105	1	1:98206046-98206046	C	intron_variant	MODIFIER	DPYD	ENSG00000188641	Transcript	ENST00000370192.3	protein_coding	-	3/22	ENST00000370192.3:c.234-11T>G	-	-	-	-	-	-	-	-	-1	-	HGNC	3012	YES	-	-	-	CCDS30777.1	ENSP00000359211	Q12882	-	UPI0000458949	-	-	-	-
135	1	chr1:98386487	DPYD	A	C	0.005556	0	1	89	0.01111	0.01105	1	1:98386487-98386487	A	5_prime_UTR_variant	MODIFIER	DPYD	ENSG00000188641	Transcript	ENST00000370192.3	protein_coding	1/23	-	ENST00000370192.3:c.-9G>T	-	93	-	-	-	-	-	-	-1	-	HGNC	3012	YES	-	-	-	CCDS30777.1	ENSP00000359211	Q12882	-	UPI0000458949	-	-	-	-
1548	6	chr6:56341107	DST	A	T	0.08889	0	16	74	0.1778	0.162	1	6:56341107-56341107	A	missense_variant	MODERATE	DST	ENSG00000151914	Transcript	ENST00000244364.6	protein_coding	73/84	-	ENST00000244364.6:c.13835A>T	ENSP00000244364.6:p.Gln4612Leu	14043	13835	4612	Q/L	cAg/cTg	-	-	-1	-	HGNC	1090	YES	-	-	-	CCDS47443.1	ENSP00000244364	Q03001	Q86T18	UPI00001C1577	deleterious(0.02)	possibly_damaging(0.581)	Gene3D:1.10.238.10,Pfam_domain:PF00435,SMART_domains:SM00150,Superfamily_domains:SSF46966	-
1549	6	chr6:56347533	DST	C	A	0.005556	0	1	89	0.01111	0.01105	1	6:56347533-56347533	C	missense_variant	MODERATE	DST	ENSG00000151914	Transcript	ENST00000244364.6	protein_coding	70/84	-	ENST00000244364.6:c.13481T>G	ENSP00000244364.6:p.Val4494Gly	13689	13481	4494	V/G	gTg/gGg	-	-	-1	-	HGNC	1090	YES	-	-	-	CCDS47443.1	ENSP00000244364	Q03001	Q86T18	UPI00001C1577	deleterious(0)	probably_damaging(0.989)	Gene3D:1.20.58.60,Pfam_domain:PF00435,SMART_domains:SM00150,Superfamily_domains:SSF46966	-
1550	6	chr6:56350158	DST	C	A	0.005556	0	1	89	0.01111	0.01105	1	6:56350158-56350158	C	synonymous_variant	LOW	DST	ENSG00000151914	Transcript	ENST00000244364.6	protein_coding	69/84	-	ENST00000244364.6:c.13290T>G	ENSP00000244364.6:p.Pro4430%3D	13498	13290	4430	P	ccT/ccG	-	-	-1	-	HGNC	1090	YES	-	-	-	CCDS47443.1	ENSP00000244364	Q03001	Q86T18	UPI00001C1577	-	-	Gene3D:1.20.58.60,Pfam_domain:PF00435,SMART_domains:SM00150,Superfamily_domains:SSF46966	-
1562	6	chr6:56417148	DST	G	T	0.005556	0	1	89	0.01111	0.01105	1	6:56417148-56417148	G	missense_variant	MODERATE	DST	ENSG00000151914	Transcript	ENST00000244364.6	protein_coding	42/84	-	ENST00000244364.6:c.8573A>C	ENSP00000244364.6:p.Gln2858Pro	8781	8573	2858	Q/P	cAa/cCa	-	-	-1	-	HGNC	1090	YES	-	-	-	CCDS47443.1	ENSP00000244364	Q03001	Q86T18	UPI00001C1577	deleterious(0.01)	benign(0.095)	Gene3D:1.20.58.60,Coiled-coils_(Ncoils):Coil,hmmpanther:PTHR11915,hmmpanther:PTHR11915:SF38,SMART_domains:SM00150,Superfamily_domains:SSF46966	-
1566	6	chr6:56417448	DST	C	A	0.005556	0	1	89	0.01111	0.01105	1	6:56417448-56417448	C	missense_variant	MODERATE	DST	ENSG00000151914	Transcript	ENST00000244364.6	protein_coding	42/84	-	ENST00000244364.6:c.8273T>G	ENSP00000244364.6:p.Leu2758Arg	8481	8273	2758	L/R	cTt/cGt	-	-	-1	-	HGNC	1090	YES	-	-	-	CCDS47443.1	ENSP00000244364	Q03001	Q86T18	UPI00001C1577	deleterious(0.03)	probably_damaging(0.991)	hmmpanther:PTHR11915,hmmpanther:PTHR11915:SF38,Superfamily_domains:SSF46966	-
1588	6	chr6:56485091	DST	-	AAA	0.01111	1	0	89	0	0.02198	0.005587	6:56485090-56485093	-	intron_variant	MODIFIER	DST	ENSG00000151914	Transcript	ENST00000244364.6	protein_coding	-	22/83	ENST00000244364.6:c.3318+4235_3318+4237del	-	-	-	-	-	-	-	-	-1	-	HGNC	1090	YES	-	-	-	CCDS47443.1	ENSP00000244364	Q03001	Q86T18	UPI00001C1577	-	-	-	-
1590	6	chr6:56485266	DST	C	G	0.005556	0	1	89	0.01111	0.01105	1	6:56485266-56485266	C	intron_variant	MODIFIER	DST	ENSG00000151914	Transcript	ENST00000244364.6	protein_coding	-	22/83	ENST00000244364.6:c.3318+4062C>G	-	-	-	-	-	-	-	-	-1	-	HGNC	1090	YES	-	-	-	CCDS47443.1	ENSP00000244364	Q03001	Q86T18	UPI00001C1577	-	-	-	-
1593	6	chr6:56489467	DST	-	TTACTC	0.005556	0	1	89	0.01111	0.01105	1	6:56489466-56489472	-	intron_variant	MODIFIER	DST	ENSG00000151914	Transcript	ENST00000244364.6	protein_coding	-	21/83	ENST00000244364.6:c.3220-46_3220-41del	-	-	-	-	-	-	-	-	-1	-	HGNC	1090	YES	-	-	-	CCDS47443.1	ENSP00000244364	Q03001	Q86T18	UPI00001C1577	-	-	-	-
4153	22	chr22:41542838	EP300	-	T	0.03333	3	0	87	0	0.06444	2.705e-006	22:41542837-41542838	-	intron_variant	MODIFIER	EP300	ENSG00000100393	Transcript	ENST00000263253.7	protein_coding	-	11/30	ENST00000263253.7:c.2131+24del	-	-	-	-	-	-	-	-	1	-	HGNC	3373	YES	-	-	-	CCDS14010.1	ENSP00000263253	Q09472	B5A250	UPI00001AE876	-	-	-	6
4157	22	chr22:41550944	EP300	A	T	0.005556	0	1	89	0.01111	0.01105	1	22:41550944-41550944	A	intron_variant	MODIFIER	EP300	ENSG00000100393	Transcript	ENST00000263253.7	protein_coding	-	16/30	ENST00000263253.7:c.3143-55T>A	-	-	-	-	-	-	-	-	1	-	HGNC	3373	YES	-	-	-	CCDS14010.1	ENSP00000263253	Q09472	B5A250	UPI00001AE876	-	-	-	-
2992	12	chr12:132466141	EP400	A	G	0.005556	0	1	89	0.01111	0.01105	1	12:132466141-132466141	A	missense_variant,splice_region_variant	MODERATE	EP400	ENSG00000183495	Transcript	ENST00000389561.2	protein_coding	4/53	-	ENST00000389561.2:c.1543G>A	ENSP00000374212.2:p.Gly515Arg	1652	1543	515	G/R	Gga/Aga	-	-	1	-	HGNC	11958	YES	-	-	-	CCDS31929.2	ENSP00000374212	Q96L91	-	UPI00004566BC	deleterious_low_confidence(0)	probably_damaging(1)	hmmpanther:PTHR10799:SF599,hmmpanther:PTHR10799	-
2996	12	chr12:132490800	EP400	A	G	0.005556	0	1	89	0.01111	0.01105	1	12:132490800-132490800	A	missense_variant	MODERATE	EP400	ENSG00000183495	Transcript	ENST00000389561.2	protein_coding	14/53	-	ENST00000389561.2:c.3079G>A	ENSP00000374212.2:p.Val1027Met	3188	3079	1027	V/M	Gtg/Atg	-	-	1	-	HGNC	11958	YES	-	-	-	CCDS31929.2	ENSP00000374212	Q96L91	-	UPI00004566BC	tolerated(0.11)	benign(0.013)	hmmpanther:PTHR10799:SF599,hmmpanther:PTHR10799	-
2997	12	chr12:132497625	EP400	T	C	0.005556	0	1	89	0.01111	0.01105	1	12:132497625-132497625	T	synonymous_variant	LOW	EP400	ENSG00000183495	Transcript	ENST00000389561.2	protein_coding	17/53	-	ENST00000389561.2:c.3513C>T	ENSP00000374212.2:p.Ala1171%3D	3622	3513	1171	A	gcC/gcT	-	-	1	-	HGNC	11958	YES	-	-	-	CCDS31929.2	ENSP00000374212	Q96L91	-	UPI00004566BC	-	-	PROSITE_profiles:PS51192,hmmpanther:PTHR10799:SF599,hmmpanther:PTHR10799,Pfam_domain:PF00176,SMART_domains:SM00487,Superfamily_domains:SSF52540	-
3004	12	chr12:132529321	EP400	C	A	0.005556	0	1	89	0.01111	0.01105	1	12:132529321-132529321	C	intron_variant	MODIFIER	EP400	ENSG00000183495	Transcript	ENST00000389561.2	protein_coding	-	36/52	ENST00000389561.2:c.6631-24A>C	-	-	-	-	-	-	-	-	1	-	HGNC	11958	YES	-	-	-	CCDS31929.2	ENSP00000374212	Q96L91	-	UPI00004566BC	-	-	-	-
3008	12	chr12:132535176	EP400	G	A	0.005556	0	1	89	0.01111	0.01105	1	12:132535176-132535176	G	missense_variant	MODERATE	EP400	ENSG00000183495	Transcript	ENST00000389561.2	protein_coding	41/53	-	ENST00000389561.2:c.7370A>G	ENSP00000374212.2:p.Lys2457Arg	7479	7370	2457	K/R	aAg/aGg	-	-	1	-	HGNC	11958	YES	-	-	-	CCDS31929.2	ENSP00000374212	Q96L91	-	UPI00004566BC	deleterious(0.01)	probably_damaging(0.997)	hmmpanther:PTHR10799:SF599,hmmpanther:PTHR10799	-
3014	12	chr12:132562069	EP400	C	A	0.01111	1	0	89	0	0.02198	0.005587	12:132562069-132562069	C	missense_variant	MODERATE	EP400	ENSG00000183495	Transcript	ENST00000389561.2	protein_coding	53/53	-	ENST00000389561.2:c.9223A>C	ENSP00000374212.2:p.Thr3075Pro	9332	9223	3075	T/P	Acc/Ccc	-	-	1	-	HGNC	11958	YES	-	-	-	CCDS31929.2	ENSP00000374212	Q96L91	-	UPI00004566BC	tolerated_low_confidence(0.12)	benign(0.015)	hmmpanther:PTHR10799:SF599,hmmpanther:PTHR10799	-
942	3	chr3:89448462	EPHA3	C	T	0.005556	0	1	89	0.01111	0.01105	1	3:89448462-89448462	C	splice_region_variant,intron_variant	LOW	EPHA3	ENSG00000044524	Transcript	ENST00000336596.2	protein_coding	-	6/16	ENST00000336596.2:c.1432-6T>C	-	-	-	-	-	-	-	-	1	-	HGNC	3387	YES	-	-	-	CCDS2922.1	ENSP00000337451	P29320	-	UPI0000163BE4	-	-	-	-
944	3	chr3:89462276	EPHA3	C	T	0.005556	0	1	89	0.01111	0.01105	1	3:89462276-89462276	C	intron_variant	MODIFIER	EPHA3	ENSG00000044524	Transcript	ENST00000336596.2	protein_coding	-	9/16	ENST00000336596.2:c.1763-15T>C	-	-	-	-	-	-	-	-	1	-	HGNC	3387	YES	-	-	-	CCDS2922.1	ENSP00000337451	P29320	-	UPI0000163BE4	-	-	-	-
945	3	chr3:89462294	EPHA3	C	A	0.005556	0	1	89	0.01111	0.01105	1	3:89462294-89462294	C	missense_variant	MODERATE	EPHA3	ENSG00000044524	Transcript	ENST00000336596.2	protein_coding	10/17	-	ENST00000336596.2:c.1766A>C	ENSP00000337451.2:p.Lys589Thr	1991	1766	589	K/T	aAa/aCa	-	-	1	-	HGNC	3387	YES	-	-	-	CCDS2922.1	ENSP00000337451	P29320	-	UPI0000163BE4	tolerated(0.2)	benign(0.202)	hmmpanther:PTHR24416:SF18,hmmpanther:PTHR24416,Pfam_domain:PF14575,PIRSF_domain:PIRSF000666	-
1626	6	chr6:93968004	EPHA7	C	T	0.05556	3	4	83	0.04444	0.1049	0.0005534	6:93968004-93968004	C	splice_acceptor_variant	HIGH	EPHA7	ENSG00000135333	Transcript	ENST00000369303.4	protein_coding	-	10/16	ENST00000369303.4:c.1925-2A>G	-	-	-	-	-	-	-	-	-1	-	HGNC	3390	YES	-	-	-	CCDS5031.1	ENSP00000358309	Q15375	-	UPI0000044771	-	-	-	-
1627	6	chr6:93973530	EPHA7	G	T	0.005556	0	1	89	0.01111	0.01105	1	6:93973530-93973530	G	intron_variant	MODIFIER	EPHA7	ENSG00000135333	Transcript	ENST00000369303.4	protein_coding	-	9/16	ENST00000369303.4:c.1798+48A>C	-	-	-	-	-	-	-	-	-1	-	HGNC	3390	YES	-	-	-	CCDS5031.1	ENSP00000358309	Q15375	-	UPI0000044771	-	-	-	-
1634	6	chr6:94128960	EPHA7	C	T	0.005556	0	1	89	0.01111	0.01105	1	6:94128960-94128960	C	splice_region_variant,intron_variant	LOW	EPHA7	ENSG00000135333	Transcript	ENST00000369303.4	protein_coding	-	1/16	ENST00000369303.4:c.97+3A>G	-	-	-	-	-	-	-	-	-1	-	HGNC	3390	YES	-	-	-	CCDS5031.1	ENSP00000358309	Q15375	-	UPI0000044771	-	-	-	-
964	3	chr3:134885838	EPHB1	T	C	0.005556	0	1	89	0.01111	0.01105	1	3:134885838-134885838	T	synonymous_variant	LOW	EPHB1	ENSG00000154928	Transcript	ENST00000398015.3	protein_coding	9/16	-	ENST00000398015.3:c.1749C>T	ENSP00000381097.3:p.Ser583%3D	2119	1749	583	S	agC/agT	-	-	1	-	HGNC	3392	YES	-	-	-	CCDS46921.1	ENSP00000381097	P54762	C9K090,C9JB88,C9J6S4,C9J466,B3KTB2	UPI000012A07E	-	-	hmmpanther:PTHR24416,hmmpanther:PTHR24416:SF173,Pfam_domain:PF14575,PIRSF_domain:PIRSF000666	-
3627	17	chr17:37868327	ERBB2	A	G	0.005556	0	1	89	0.01111	0.01105	1	17:37868327-37868327	A	intron_variant	MODIFIER	ERBB2	ENSG00000141736	Transcript	ENST00000269571.5	protein_coding	-	8/26	ENST00000269571.5:c.1021+27G>A	-	-	-	-	-	-	-	-	1	-	HGNC	3430	YES	-	-	-	CCDS32642.1	ENSP00000269571	P04626	Q9NP09,J3QLV2,J3KS21,F5H1T4	UPI000003F55F	-	-	-	-
3629	17	chr17:37868741	ERBB2	C	G	0.005556	0	1	89	0.01111	0.01105	1	17:37868741-37868741	C	intron_variant	MODIFIER	ERBB2	ENSG00000141736	Transcript	ENST00000269571.5	protein_coding	-	9/26	ENST00000269571.5:c.1148+40G>C	-	-	-	-	-	-	-	-	1	-	HGNC	3430	YES	-	-	-	CCDS32642.1	ENSP00000269571	P04626	Q9NP09,J3QLV2,J3KS21,F5H1T4	UPI000003F55F	-	-	-	-
3636	17	chr17:37883680	ERBB2	T	C	0.005556	0	1	89	0.01111	0.01105	1	17:37883680-37883680	T	synonymous_variant	LOW	ERBB2	ENSG00000141736	Transcript	ENST00000269571.5	protein_coding	26/27	-	ENST00000269571.5:c.3292C>T	ENSP00000269571.4:p.Leu1098%3D	3451	3292	1098	L	Ctg/Ttg	-	-	1	-	HGNC	3430	YES	-	-	-	CCDS32642.1	ENSP00000269571	P04626	Q9NP09,J3QLV2,J3KS21,F5H1T4	UPI000003F55F	-	-	PIRSF_domain:PIRSF000619	-
2948	12	chr12:56479046	ERBB3	T	C	0.005556	0	1	89	0.01111	0.01105	1	12:56479046-56479046	T	intron_variant	MODIFIER	ERBB3	ENSG00000065361	Transcript	ENST00000267101.3	protein_coding	-	3/27	ENST00000267101.3:c.421+81C>T	-	-	-	-	-	-	-	-	1	-	HGNC	3431	YES	-	-	-	CCDS31833.1	ENSP00000267101	P21860	Q9NNX2,F8VX90,F8VW56,F8VW48,F8VRL0	UPI000012A113	-	-	-	-
700	2	chr2:212248634	ERBB4	T	G	0.005556	0	1	89	0.01111	0.01105	1	2:212248634-212248634	T	synonymous_variant	LOW	ERBB4	ENSG00000178568	Transcript	ENST00000342788.4	protein_coding	28/28	-	ENST00000342788.4:c.3633C>A	ENSP00000342235.4:p.Thr1211%3D	3944	3633	1211	T	acC/acA	-	-	-1	-	HGNC	3432	YES	-	-	-	CCDS2394.1	ENSP00000342235	Q15303	Q580Q7,Q53T57,Q53R48,Q53R25,Q53QS8,Q4ZG14,E9PDR1	UPI00000499DF	-	-	PIRSF_domain:PIRSF000619	-
704	2	chr2:212495163	ERBB4	T	G	0.005556	0	1	89	0.01111	0.01105	1	2:212495163-212495163	T	intron_variant	MODIFIER	ERBB4	ENSG00000178568	Transcript	ENST00000342788.4	protein_coding	-	17/27	ENST00000342788.4:c.2079+24C>A	-	-	-	-	-	-	-	-	-1	-	HGNC	3432	YES	-	-	-	CCDS2394.1	ENSP00000342235	Q15303	Q580Q7,Q53T57,Q53R48,Q53R25,Q53QS8,Q4ZG14,E9PDR1	UPI00000499DF	-	-	-	-
709	2	chr2:212989451	ERBB4	T	G	0.005556	0	1	89	0.01111	0.01105	1	2:212989451-212989451	T	intron_variant	MODIFIER	ERBB4	ENSG00000178568	Transcript	ENST00000342788.4	protein_coding	-	2/27	ENST00000342788.4:c.234+26C>A	-	-	-	-	-	-	-	-	-1	-	HGNC	3432	YES	-	-	-	CCDS2394.1	ENSP00000342235	Q15303	Q580Q7,Q53T57,Q53R48,Q53R25,Q53QS8,Q4ZG14,E9PDR1	UPI00000499DF	-	-	-	-
4068	21	chr21:39817470	ERG	C	T	0.01111	1	0	89	0	0.02198	0.005587	21:39817470-39817470	C	synonymous_variant	LOW	ERG	ENSG00000157554	Transcript	ENST00000417133.2	protein_coding	4/12	-	ENST00000417133.2:c.114A>G	ENSP00000414150.2:p.Thr38%3D	300	114	38	T	acA/acG	-	-	-1	-	HGNC	3446	YES	-	-	-	CCDS46648.1	ENSP00000414150	P11308	Q16031,B4DVX5	UPI000018681C	-	-	hmmpanther:PTHR11849,hmmpanther:PTHR11849:SF161	-
1878	7	chr7:13950941	ETV1	T	G	0.005556	0	1	89	0.01111	0.01105	1	7:13950941-13950941	T	intron_variant	MODIFIER	ETV1	ENSG00000006468	Transcript	ENST00000430479.1	protein_coding	-	9/13	ENST00000430479.1:c.803-9C>A	-	-	-	-	-	-	-	-	-1	-	HGNC	3490	YES	-	-	-	CCDS55088.1	ENSP00000405327	P50549	C9J9L1,C9J4P4,C9J0B7	UPI000012A26E	-	-	-	-
3645	17	chr17:41610590	ETV4	G	C	0.005556	0	1	89	0.01111	0.01105	1	17:41610590-41610590	G	missense_variant	MODERATE	ETV4	ENSG00000175832	Transcript	ENST00000319349.5	protein_coding	7/13	-	ENST00000319349.5:c.510G>C	ENSP00000321835.4:p.Gln170His	809	510	170	Q/H	caG/caC	-	-	-1	-	HGNC	3493	YES	-	-	-	CCDS11465.1	ENSP00000321835	P43268	K7EMW0	UPI0000000236	tolerated(0.24)	benign(0.003)	Pfam_domain:PF04621,hmmpanther:PTHR11849,hmmpanther:PTHR11849:SF181	-
2329	8	chr8:118825146	EXT1	A	T	0.005556	0	1	89	0.01111	0.01105	1	8:118825146-118825146	A	missense_variant	MODERATE	EXT1	ENSG00000182197	Transcript	ENST00000378204.2	protein_coding	8/11	-	ENST00000378204.2:c.1687A>T	ENSP00000367446.2:p.Ser563Cys	2494	1687	563	S/C	Agc/Tgc	-	-	-1	-	HGNC	3512	YES	-	-	-	CCDS6324.1	ENSP00000367446	Q16394	T2FFJ4,S5Y321,D7RTA7	UPI000012A3A1	deleterious(0)	probably_damaging(0.929)	Superfamily_domains:SSF53448,Pfam_domain:PF09258,Gene3D:3.90.550.10,hmmpanther:PTHR11062,hmmpanther:PTHR11062:SF45	-
2333	8	chr8:119122431	EXT1	A	G	0.005556	0	1	89	0.01111	0.01105	1	8:119122431-119122431	A	synonymous_variant	LOW	EXT1	ENSG00000182197	Transcript	ENST00000378204.2	protein_coding	1/11	-	ENST00000378204.2:c.855C>T	ENSP00000367446.2:p.His285%3D	1662	855	285	H	caC/caT	-	-	-1	-	HGNC	3512	YES	-	-	-	CCDS6324.1	ENSP00000367446	Q16394	T2FFJ4,S5Y321,D7RTA7	UPI000012A3A1	-	-	Pfam_domain:PF03016,hmmpanther:PTHR11062,hmmpanther:PTHR11062:SF45	-
2746	11	chr11:44228576	EXT2	-	A	0.005556	0	1	89	0.01111	0.01105	1	11:44228575-44228576	-	intron_variant	MODIFIER	EXT2	ENSG00000151348	Transcript	ENST00000395673.3	protein_coding	-	10/13	ENST00000395673.3:c.1761+72del	-	-	-	-	-	-	-	-	1	-	HGNC	3513	YES	-	-	-	CCDS53618.1	ENSP00000379032	Q93063	E9PNL9,E9PJA5	UPI0000EE3A5C	-	-	-	5
2088	7	chr7:148523504	EZH2	A	T	0.01667	0	3	87	0.03333	0.03278	1	7:148523504-148523504	A	intron_variant	MODIFIER	EZH2	ENSG00000106462	Transcript	ENST00000320356.2	protein_coding	-	8/19	ENST00000320356.2:c.907+42A>T	-	-	-	-	-	-	-	-	-1	-	HGNC	3527	YES	-	-	-	CCDS5891.1	ENSP00000320147	Q15910	Q75MQ0,Q6R125	UPI000006D77C	-	-	-	-
4218	23	chrX:63411640	FAM123B	ATAGAACTCAT	-	0.008	0	1	34	0.02857	0.02816	1	X:63411639-63411639	ATAGAACTCAT	frameshift_variant	HIGH	AMER1	ENSG00000184675	Transcript	ENST00000330258.3	protein_coding	2/2	-	ENST00000330258.3:c.1517_1527dup	ENSP00000329117.3:p.Glu510MetfsTer35	1800-1801	1527-1528	509-510	-/MSSX	-/ATGAGTTCTAT	-	-	-1	-	HGNC	26837	YES	-	-	-	CCDS14377.2	ENSP00000329117	Q5JTC6	-	UPI0000EDA0FC	-	-	Pfam_domain:PF09422,hmmpanther:PTHR22237,hmmpanther:PTHR22237:SF0	-
3505	16	chr16:89857743	FANCA	C	G	0.005556	0	1	89	0.01111	0.01105	1	16:89857743-89857743	C	intron_variant	MODIFIER	FANCA	ENSG00000187741	Transcript	ENST00000389301.3	protein_coding	-	14/42	ENST00000389301.3:c.1359+68C>G	-	-	-	-	-	-	-	-	-1	-	HGNC	3582	YES	-	-	-	CCDS32515.1	ENSP00000373952	O15360	H3BT53	UPI0000520A1A	-	-	-	-
3516	16	chr16:89877320	FANCA	A	C	0.005556	0	1	89	0.01111	0.01105	1	16:89877320-89877320	A	intron_variant	MODIFIER	FANCA	ENSG00000187741	Transcript	ENST00000389301.3	protein_coding	-	4/42	ENST00000389301.3:c.426+17G>T	-	-	-	-	-	-	-	-	-1	-	HGNC	3582	YES	-	-	-	CCDS32515.1	ENSP00000373952	O15360	H3BT53	UPI0000520A1A	-	-	-	-
780	3	chr3:10088295	FANCD2	G	A	0.005556	0	1	89	0.01111	0.01105	1	3:10088295-10088295	G	missense_variant	MODERATE	FANCD2	ENSG00000144554	Transcript	ENST00000287647.3	protein_coding	15/43	-	ENST00000287647.3:c.1166A>G	ENSP00000287647.3:p.Tyr389Cys	1259	1166	389	Y/C	tAt/tGt	-	-	1	-	HGNC	3585	YES	-	-	-	CCDS2595.1	ENSP00000287647	Q9BXW9	-	UPI000006F678	deleterious(0.03)	probably_damaging(0.983)	hmmpanther:PTHR32086,Pfam_domain:PF14631	-
791	3	chr3:10132031	FANCD2	-	A	0.01111	0	2	88	0.02222	0.02198	1	3:10132030-10132031	-	frameshift_variant	HIGH	FANCD2	ENSG00000144554	Transcript	ENST00000287647.3	protein_coding	37/43	-	ENST00000287647.3:c.3745del	ENSP00000287647.3:p.Ile1249LeufsTer33	3832	3739	1247	K/X	Aaa/aa	-	-	1	-	HGNC	3585	YES	-	-	-	CCDS2595.1	ENSP00000287647	Q9BXW9	-	UPI000006F678	-	-	hmmpanther:PTHR32086,Pfam_domain:PF14631	6
3895	19	chr19:8146019	FBN3	G	T	0.01111	1	0	89	0	0.02198	0.005587	19:8146019-8146019	G	intron_variant	MODIFIER	FBN3	ENSG00000142449	Transcript	ENST00000600128.1	protein_coding	-	58/63	ENST00000600128.1:c.7337-16A>C	-	-	-	-	-	-	-	-	-1	-	HGNC	18794	YES	-	-	-	CCDS12196.1	ENSP00000470498	Q75N90	-	UPI000013D88F	-	-	-	-
1196	4	chr4:153244077	FBXW7	A	C	0.005556	0	1	89	0.01111	0.01105	1	4:153244077-153244077	A	stop_gained	HIGH	FBXW7	ENSG00000109670	Transcript	ENST00000281708.4	protein_coding	12/12	-	ENST00000281708.4:c.2080G>T	ENSP00000281708.3:p.Glu694Ter	3310	2080	694	E/*	Gaa/Taa	-	-	-1	-	HGNC	16712	YES	-	-	-	CCDS3777.1	ENSP00000281708	Q969H0	S4R3N3,H9CWI3,H9CWI2,G0Z2K0,A7BJS8	UPI000007007E	-	-	SMART_domains:SM00320,hmmpanther:PTHR22844,hmmpanther:PTHR22844:SF116	-
2165	8	chr8:38272357	FGFR1	A	T	0.04444	0	8	82	0.08889	0.08494	1	8:38272357-38272357	A	synonymous_variant	LOW	FGFR1	ENSG00000077782	Transcript	ENST00000425967.3	protein_coding	15/19	-	ENST00000425967.3:c.2010A>T	ENSP00000393312.3:p.Ile670%3D	2333	2010	670	I	atA/atT	-	-	-1	-	HGNC	3688	YES	-	-	-	CCDS55223.1	ENSP00000393312	P11362	E9PN14,D3DSX2,C9J205	UPI0001CE06A3	-	-	PROSITE_profiles:PS50011,hmmpanther:PTHR24416,hmmpanther:PTHR24416:SF131,Gene3D:1.10.510.10,Pfam_domain:PF07714,SMART_domains:SM00219,PIRSF_domain:PIRSF000628,Superfamily_domains:SSF56112	-
2688	10	chr10:123246886	FGFR2	C	T	0.005556	0	1	89	0.01111	0.01105	1	10:123246886-123246886	C	missense_variant	MODERATE	FGFR2	ENSG00000066468	Transcript	ENST00000457416.2	protein_coding	15/18	-	ENST00000457416.2:c.2042A>G	ENSP00000410294.2:p.Tyr681Cys	2634	2042	681	Y/C	tAc/tGc	-	-	-1	-	HGNC	3689	YES	-	-	-	CCDS7620.2	ENSP00000410294	P21802	Q9UMB0,Q9UEH2,D3DRD6	UPI000002A99A	deleterious(0)	probably_damaging(0.966)	PROSITE_profiles:PS50011,hmmpanther:PTHR24416:SF130,hmmpanther:PTHR24416,Pfam_domain:PF07714,Gene3D:1.10.510.10,SMART_domains:SM00219,PIRSF_domain:PIRSF000628,Superfamily_domains:SSF56112	-
1065	4	chr4:1803326	FGFR3	-	C	0.005556	0	1	89	0.01111	0.01105	1	4:1803325-1803326	-	intron_variant	MODIFIER	FGFR3	ENSG00000068078	Transcript	ENST00000340107.4	protein_coding	-	5/17	ENST00000340107.4:c.616-19del	-	-	-	-	-	-	-	-	1	-	HGNC	3690	YES	-	-	-	CCDS54706.1	ENSP00000339824	P22607	Q8NI16	UPI000002A9AC	-	-	-	2
1073	4	chr4:1807545	FGFR3	-	C	0.01111	0	2	88	0.02222	0.02198	1	4:1807544-1807545	-	frameshift_variant	HIGH	FGFR3	ENSG00000068078	Transcript	ENST00000340107.4	protein_coding	13/18	-	ENST00000340107.4:c.1724del	ENSP00000339824.4:p.Pro575ArgfsTer53	1976	1720	574	P/X	Ccc/cc	-	-	1	-	HGNC	3690	YES	-	-	-	CCDS54706.1	ENSP00000339824	P22607	Q8NI16	UPI000002A9AC	-	-	Gene3D:1.10.510.10,Pfam_domain:PF07714,PIRSF_domain:PIRSF000628,PROSITE_profiles:PS50011,hmmpanther:PTHR24416,hmmpanther:PTHR24416:SF128,SMART_domains:SM00219,Superfamily_domains:SSF56112	4
1377	5	chr5:176520463	FGFR4	A	G	0.005556	0	1	89	0.01111	0.01105	1	5:176520463-176520463	A	synonymous_variant	LOW	FGFR4	ENSG00000160867	Transcript	ENST00000292408.4	protein_coding	10/18	-	ENST00000292408.4:c.1308G>A	ENSP00000292408.4:p.Val436%3D	1553	1308	436	V	gtG/gtA	-	-	1	-	HGNC	3691	YES	-	-	-	CCDS4410.1	ENSP00000292408	P22455	G3JVM2,E7EWF4,D6RJD4,D6RG06,D6R9V0	UPI000012A72D	-	-	Low_complexity_(Seg):seg,hmmpanther:PTHR24416,hmmpanther:PTHR24416:SF312,PIRSF_domain:PIRSF000628	-
3021	13	chr13:28597449	FLT3	-	CT	0.02222	2	0	88	0	0.04346	9.469e-005	13:28597448-28597450	-	intron_variant	MODIFIER	FLT3	ENSG00000122025	Transcript	ENST00000241453.7	protein_coding	-	19/23	ENST00000241453.7:c.2418+38_2418+39del	-	-	-	-	-	-	-	-	-1	-	HGNC	3765	YES	-	-	-	CCDS31953.1	ENSP00000241453	P36888	-	UPI00001FC90B	-	-	-	-1
1403	5	chr5:180035995	FLT4	G	C	0.005556	0	1	89	0.01111	0.01105	1	5:180035995-180035995	G	missense_variant	MODERATE	FLT4	ENSG00000037280	Transcript	ENST00000261937.6	protein_coding	29/30	-	ENST00000261937.6:c.3866G>C	ENSP00000261937.6:p.Ser1289Thr	3945	3866	1289	S/T	aGc/aCc	-	-	-1	-	HGNC	3767	YES	-	-	-	CCDS4457.1	ENSP00000261937	P35916	D6RFF2	UPI00001488E7	tolerated(0.49)	benign(0.028)	-	-
712	2	chr2:216232553	FN1	G	A	0.005556	0	1	89	0.01111	0.01105	1	2:216232553-216232553	G	intron_variant	MODIFIER	FN1	ENSG00000115414	Transcript	ENST00000354785.4	protein_coding	-	42/45	ENST00000354785.4:c.7018+33T>C	-	-	-	-	-	-	-	-	-1	-	HGNC	3778	YES	-	-	-	CCDS42814.1	ENSP00000346839	P02751	Q9H382,Q7L553,Q53S27,A6YID6	UPI0000E5A2B5	-	-	-	-
717	2	chr2:216237084	FN1	C	G	0.005556	0	1	89	0.01111	0.01105	1	2:216237084-216237084	C	missense_variant	MODERATE	FN1	ENSG00000115414	Transcript	ENST00000354785.4	protein_coding	40/46	-	ENST00000354785.4:c.6262C>G	ENSP00000346839.4:p.Leu2088Val	6632	6262	2088	L/V	Ctg/Gtg	-	-	-1	-	HGNC	3778	YES	-	-	-	CCDS42814.1	ENSP00000346839	P02751	Q9H382,Q7L553,Q53S27,A6YID6	UPI0000E5A2B5	tolerated(0.12)	possibly_damaging(0.89)	hmmpanther:PTHR19143:SF187,hmmpanther:PTHR19143	-
737	2	chr2:216272993	FN1	A	C	0.005556	0	1	89	0.01111	0.01105	1	2:216272993-216272993	A	intron_variant	MODIFIER	FN1	ENSG00000115414	Transcript	ENST00000354785.4	protein_coding	-	16/45	ENST00000354785.4:c.2428+28G>T	-	-	-	-	-	-	-	-	-1	-	HGNC	3778	YES	-	-	-	CCDS42814.1	ENSP00000346839	P02751	Q9H382,Q7L553,Q53S27,A6YID6	UPI0000E5A2B5	-	-	-	-
3051	13	chr13:41134840	FOXO1	C	A	0.005556	0	1	89	0.01111	0.01105	1	13:41134840-41134840	C	missense_variant	MODERATE	FOXO1	ENSG00000150907	Transcript	ENST00000379561.5	protein_coding	2/3	-	ENST00000379561.5:c.788T>G	ENSP00000368880.4:p.Phe263Cys	1173	788	263	F/C	tTt/tGt	-	-	-1	-	HGNC	3819	YES	-	-	-	CCDS9371.1	ENSP00000368880	Q12778	-	UPI000013DC20	tolerated(0.08)	probably_damaging(0.989)	Low_complexity_(Seg):seg,hmmpanther:PTHR11829,hmmpanther:PTHR11829:SF159	-
1642	6	chr6:108985258	FOXO3	G	A	0.005556	0	1	89	0.01111	0.01105	1	6:108985258-108985258	G	missense_variant	MODERATE	FOXO3	ENSG00000118689	Transcript	ENST00000406360.1	protein_coding	2/3	-	ENST00000406360.1:c.1222A>G	ENSP00000385824.1:p.Met408Val	1565	1222	408	M/V	Atg/Gtg	-	-	1	-	HGNC	3821	YES	-	-	-	CCDS5068.1	ENSP00000385824	O43524	B4DVZ6	UPI000012ADEA	tolerated(0.39)	benign(0.003)	hmmpanther:PTHR11829,hmmpanther:PTHR11829:SF129	-
936	3	chr3:71179709	FOXP1	C	-	0.005556	0	1	89	0.01111	0.01105	1	3:71179708-71179708	C	frameshift_variant	HIGH	FOXP1	ENSG00000114861	Transcript	ENST00000491238.1	protein_coding	2020-01-16	-	ENST00000491238.1:c.126dup	ENSP00000420736.1:p.Lys43GlufsTer39	280-281	126-127	42-43	-/X	-/G	-	-	-1	-	HGNC	3823	YES	-	-	-	CCDS58837.1	ENSP00000420736	-	Q8IXF4,E9PFD3,C9J5T4,C9IYY1,B4DMV4	UPI00002099BD	-	-	-	-
1471	6	chr6:41559050	FOXP4	T	C	0.005556	0	1	89	0.01111	0.01105	1	6:41559050-41559050	T	missense_variant	MODERATE	FOXP4	ENSG00000137166	Transcript	ENST00000373060.1	protein_coding	13/17	-	ENST00000373060.1:c.1526C>T	ENSP00000362151.1:p.Ala509Val	1984	1526	509	A/V	gCc/gTc	-	-	1	-	HGNC	20842	YES	-	-	-	CCDS34447.1	ENSP00000362151	Q8IVH2	Q8N4A5,Q69YN9	UPI000007462D	deleterious(0)	probably_damaging(0.978)	Superfamily_domains:SSF46785,SMART_domains:SM00339,Gene3D:1.10.10.10,Pfam_domain:PF00250,hmmpanther:PTHR25042:SF13,hmmpanther:PTHR25042,PROSITE_profiles:PS50039	-
3885	19	chr19:3531825	FZR1	G	C	0.005556	0	1	89	0.01111	0.01105	1	19:3531825-3531825	G	intron_variant	MODIFIER	FZR1	ENSG00000105325	Transcript	ENST00000395095.3	protein_coding	-	8/12	ENST00000395095.3:c.823+11C>G	-	-	-	-	-	-	-	-	1	-	HGNC	24824	YES	-	-	-	CCDS45916.1	ENSP00000378529	Q9UM11	-	UPI00001D6A23	-	-	-	-
955	3	chr3:128202760	GATA2	C	G	0.03889	1	5	84	0.05556	0.07475	0.114	3:128202760-128202760	C	synonymous_variant	LOW	GATA2	ENSG00000179348	Transcript	ENST00000341105.2	protein_coding	4/6	-	ENST00000341105.2:c.960C>G	ENSP00000345681.2:p.Gly320%3D	1292	960	320	G	ggC/ggG	-	-	-1	-	HGNC	4171	YES	-	-	-	CCDS3049.1	ENSP00000345681	P23769	C9J965	UPI00000730CD	-	-	PROSITE_profiles:PS50114,hmmpanther:PTHR10071:SF149,hmmpanther:PTHR10071,Gene3D:3.30.50.10,Pfam_domain:PF00320,SMART_domains:SM00401,PIRSF_domain:PIRSF003027,Superfamily_domains:SSF57716,Prints_domain:PR00619	-
4052	20	chr20:57428437	GNAS	G	C	0.1222	0	22	68	0.2444	0.2146	0.3487	20:57428437-57428437	G	synonymous_variant	LOW	GNAS	ENSG00000087460	Transcript	ENST00000371100.4	protein_coding	1/13	-	ENST00000371100.4:c.117C>G	ENSP00000360141.3:p.Pro39%3D	669	117	39	P	ccC/ccG	-	-	1	-	HGNC	4392	YES	-	-	-	CCDS46622.1	ENSP00000360141	Q5JWF2	S4R3W4,S4R3V9,S4R3F1,S4R3E3,S4R379,B0AZR9	UPI0000E444AE	-	-	Low_complexity_(Seg):seg	-
2162	8	chr8:37691418	GPR124	A	C	0.005556	0	1	89	0.01111	0.01105	1	8:37691418-37691418	A	intron_variant	MODIFIER	GPR124	ENSG00000020181	Transcript	ENST00000412232.2	protein_coding	-	10/18	ENST00000412232.2:c.1446+63C>A	-	-	-	-	-	-	-	-	1	-	HGNC	17849	YES	-	-	-	CCDS6097.2	ENSP00000406367	Q96PE1	-	UPI00004AE50D	-	-	-	-
489	2	chr2:11751005	GREB1	T	G	0.01111	1	0	89	0	0.02198	0.005587	2:11751005-11751005	T	missense_variant	MODERATE	GREB1	ENSG00000196208	Transcript	ENST00000381486.2	protein_coding	18/33	-	ENST00000381486.2:c.2858G>T	ENSP00000370896.2:p.Arg953Leu	3158	2858	953	R/L	cGg/cTg	-	-	1	-	HGNC	24885	YES	-	-	-	CCDS42655.1	ENSP00000370896	Q4ZG55	-	UPI0000163937	deleterious(0)	probably_damaging(0.998)	hmmpanther:PTHR15720,hmmpanther:PTHR15720:SF13	-
2803	11	chr11:106579288	GUCY1A2	A	G	0.005556	0	1	89	0.01111	0.01105	1	11:106579288-106579288	A	synonymous_variant	LOW	GUCY1A2	ENSG00000152402	Transcript	ENST00000282249.2	protein_coding	8/9	-	ENST00000282249.2:c.2034C>T	ENSP00000282249.2:p.Phe678%3D	2424	2034	678	F	ttC/ttT	-	-	-1	-	HGNC	4684	YES	-	-	-	CCDS58170.1	ENSP00000282249	P33402	-	UPI000002A79C	-	-	Gene3D:3.30.70.1230,Pfam_domain:PF00211,PROSITE_patterns:PS00452,PROSITE_profiles:PS50125,hmmpanther:PTHR11920,hmmpanther:PTHR11920:SF276,SMART_domains:SM00044,Superfamily_domains:SSF55073	-
2189	8	chr8:42868456	HOOK3	-	TTTTTT	0.005556	0	1	89	0.01111	0.01105	1	8:42868455-42868461	-	intron_variant	MODIFIER	HOOK3	ENSG00000168172	Transcript	ENST00000307602.4	protein_coding	-	20/21	ENST00000307602.4:c.1945-8_1945-3del	-	-	-	-	-	-	-	-	1	-	HGNC	23576	YES	-	-	-	CCDS6139.1	ENSP00000305699	Q86VS8	-	UPI000006DD7B	-	-	-	8
3167	14	chr14:102548088	HSP90AA1	G	T	0.005556	0	1	89	0.01111	0.01105	1	14:102548088-102548088	G	missense_variant	MODERATE	HSP90AA1	ENSG00000080824	Transcript	ENST00000334701.7	protein_coding	12/12	-	ENST00000334701.7:c.2526A>C	ENSP00000335153.7:p.Glu842Asp	2808	2526	842	E/D	gaA/gaC	-	-	-1	-	HGNC	5253	YES	-	-	-	CCDS32160.1	ENSP00000335153	P07900	Q96HX7,Q8TBA7,Q86SX1,K9JA46	UPI0000408144	tolerated_low_confidence(0.1)	benign(0.276)	hmmpanther:PTHR11528,Pfam_domain:PF00183,PIRSF_domain:PIRSF002583	-
3170	14	chr14:102548797	HSP90AA1	C	G	0.005556	0	1	89	0.01111	0.01105	1	14:102548797-102548797	C	intron_variant	MODIFIER	HSP90AA1	ENSG00000080824	Transcript	ENST00000334701.7	protein_coding	-	10/11	ENST00000334701.7:c.2122-16C>G	-	-	-	-	-	-	-	-	-1	-	HGNC	5253	YES	-	-	-	CCDS32160.1	ENSP00000335153	P07900	Q96HX7,Q8TBA7,Q86SX1,K9JA46	UPI0000408144	-	-	-	-
3286	15	chr15:90628243	IDH2	A	C	0.005556	0	1	89	0.01111	0.01105	1	15:90628243-90628243	A	missense_variant	MODERATE	IDH2	ENSG00000182054	Transcript	ENST00000330062.3	protein_coding	9/11	-	ENST00000330062.3:c.1168G>T	ENSP00000331897.3:p.Asp390Tyr	1282	1168	390	D/Y	Gac/Tac	-	-	-1	-	HGNC	5383	YES	-	-	-	CCDS10359.1	ENSP00000331897	P48735	H0YLL5,B4DSZ6,B4DFL2	UPI000012D1C3	deleterious_low_confidence(0)	possibly_damaging(0.817)	hmmpanther:PTHR11822,Pfam_domain:PF00180,TIGRFAM_domain:TIGR00127,Gene3D:3.40.718.10,PIRSF_domain:PIRSF000108,Superfamily_domains:SSF53659	-
3305	15	chr15:99250742	IGF1R	C	A	0.005556	0	1	89	0.01111	0.01105	1	15:99250742-99250742	C	intron_variant	MODIFIER	IGF1R	ENSG00000140443	Transcript	ENST00000268035.6	protein_coding	-	1/20	ENST00000268035.6:c.95-49A>C	-	-	-	-	-	-	-	-	1	-	HGNC	5465	YES	-	-	-	CCDS10378.1	ENSP00000268035	P08069	H0YNR0,H0YMJ5	UPI000012D3EA	-	-	-	-
3313	15	chr15:99460151	IGF1R	T	G	0.005556	0	1	89	0.01111	0.01105	1	15:99460151-99460151	T	intron_variant	MODIFIER	IGF1R	ENSG00000140443	Transcript	ENST00000268035.6	protein_coding	-	10/20	ENST00000268035.6:c.2201+46G>T	-	-	-	-	-	-	-	-	1	-	HGNC	5465	YES	-	-	-	CCDS10378.1	ENSP00000268035	P08069	H0YNR0,H0YMJ5	UPI000012D3EA	-	-	-	-
1809	6	chr6:160412166	IGF2R	T	A	0.01111	0	2	88	0.02222	0.02198	1	6:160412166-160412166	T	intron_variant	MODIFIER	IGF2R	ENSG00000197081	Transcript	ENST00000356956.1	protein_coding	-	1/47	ENST00000356956.1:c.150-50A>T	-	-	-	-	-	-	-	-	1	-	HGNC	5467	YES	-	-	-	CCDS5273.1	ENSP00000349437	P11717	A0N9R7,A0N9R6	UPI0000072478	-	-	-	-
1819	6	chr6:160491086	IGF2R	G	A	0.005556	0	1	89	0.01111	0.01105	1	6:160491086-160491086	G	missense_variant	MODERATE	IGF2R	ENSG00000197081	Transcript	ENST00000356956.1	protein_coding	31/48	-	ENST00000356956.1:c.4439A>G	ENSP00000349437.1:p.Gln1480Arg	4587	4439	1480	Q/R	cAa/cGa	-	-	1	-	HGNC	5467	YES	-	-	-	CCDS5273.1	ENSP00000349437	P11717	A0N9R7,A0N9R6	UPI0000072478	tolerated(0.41)	benign(0.012)	hmmpanther:PTHR10439:SF4,hmmpanther:PTHR10439,Pfam_domain:PF00878,Gene3D:2.70.130.10,Superfamily_domains:SSF50911	-
2184	8	chr8:42175297	IKBKB	C	T	0.005556	0	1	89	0.01111	0.01105	1	8:42175297-42175297	C	splice_region_variant,intron_variant	LOW	IKBKB	ENSG00000104365	Transcript	ENST00000520810.1	protein_coding	-	12/21	ENST00000520810.1:c.1240+8T>C	-	-	-	-	-	-	-	-	1	-	HGNC	5960	YES	-	-	-	CCDS6128.1	ENSP00000430684	O14920	E5RGW5	UPI0000033729	-	-	-	-
426	1	chr1:206647652	IKBKE	T	A	0.005556	0	1	89	0.01111	0.01105	1	1:206647652-206647652	T	intron_variant	MODIFIER	IKBKE	ENSG00000143466	Transcript	ENST00000367120.3	protein_coding	-	3/21	ENST00000367120.3:c.88-22A>T	-	-	-	-	-	-	-	-	1	-	HGNC	14552	YES	-	-	-	CCDS30996.1	ENSP00000356087	Q14164	-	UPI0000033727	-	-	-	-
1266	5	chr5:55237092	IL6ST	C	A	0.005556	0	1	89	0.01111	0.01105	1	5:55237092-55237092	C	missense_variant	MODERATE	IL6ST	ENSG00000134352	Transcript	ENST00000381298.2	protein_coding	17/17	-	ENST00000381298.2:c.2575T>G	ENSP00000370698.2:p.Ser859Ala	2888	2575	859	S/A	Tcc/Gcc	-	-	-1	-	HGNC	6021	YES	-	-	-	CCDS3971.1	ENSP00000370698	P40189	-	UPI000013CF29	tolerated(0.79)	benign(0.003)	-	-
1267	5	chr5:55237596	IL6ST	A	C	0.005556	0	1	89	0.01111	0.01105	1	5:55237596-55237596	A	missense_variant	MODERATE	IL6ST	ENSG00000134352	Transcript	ENST00000381298.2	protein_coding	17/17	-	ENST00000381298.2:c.2071G>T	ENSP00000370698.2:p.Val691Leu	2384	2071	691	V/L	Gta/Tta	-	-	-1	-	HGNC	6021	YES	-	-	-	CCDS3971.1	ENSP00000370698	P40189	-	UPI000013CF29	tolerated(0.06)	possibly_damaging(0.571)	hmmpanther:PTHR23036:SF25,hmmpanther:PTHR23036	-
1269	5	chr5:55247262	IL6ST	-	GAAA	0.005556	0	1	89	0.01111	0.01105	1	5:55247261-55247265	-	intron_variant	MODIFIER	IL6ST	ENSG00000134352	Transcript	ENST00000381298.2	protein_coding	-	14/16	ENST00000381298.2:c.1840+32_1840+35del	-	-	-	-	-	-	-	-	-1	-	HGNC	6021	YES	-	-	-	CCDS3971.1	ENSP00000370698	P40189	-	UPI000013CF29	-	-	-	-5
1273	5	chr5:55256341	IL6ST	T	C	0.005556	0	1	89	0.01111	0.01105	1	5:55256341-55256341	T	missense_variant	MODERATE	IL6ST	ENSG00000134352	Transcript	ENST00000381298.2	protein_coding	8/17	-	ENST00000381298.2:c.862G>A	ENSP00000370698.2:p.Asp288Asn	1175	862	288	D/N	Gac/Aac	-	-	-1	-	HGNC	6021	YES	-	-	-	CCDS3971.1	ENSP00000370698	P40189	-	UPI000013CF29	tolerated(0.28)	benign(0.251)	PROSITE_profiles:PS50853,hmmpanther:PTHR23036:SF25,hmmpanther:PTHR23036,Gene3D:2.60.40.10,Pfam_domain:PF00041,SMART_domains:SM00060,Superfamily_domains:SSF49265	-
1277	5	chr5:55264283	IL6ST	G	T	0.005556	0	1	89	0.01111	0.01105	1	5:55264283-55264283	G	intron_variant	MODIFIER	IL6ST	ENSG00000134352	Transcript	ENST00000381298.2	protein_coding	-	4/16	ENST00000381298.2:c.371-59A>C	-	-	-	-	-	-	-	-	-1	-	HGNC	6021	YES	-	-	-	CCDS3971.1	ENSP00000370698	P40189	-	UPI000013CF29	-	-	-	-
1422	6	chr6:397155	IRF4	T	C	0.005556	0	1	89	0.01111	0.01105	1	6:397155-397155	T	synonymous_variant	LOW	IRF4	ENSG00000137265	Transcript	ENST00000380956.4	protein_coding	5/9	-	ENST00000380956.4:c.540C>T	ENSP00000370343.4:p.Asp180%3D	666	540	180	D	gaC/gaT	-	-	1	-	HGNC	6119	YES	-	-	-	CCDS4469.1	ENSP00000370343	Q15306	-	UPI000012D88B	-	-	hmmpanther:PTHR11949,hmmpanther:PTHR11949:SF6	-
3073	13	chr13:110434840	IRS2	T	C	0.005556	0	1	89	0.01111	0.01105	1	13:110434840-110434840	T	synonymous_variant	LOW	IRS2	ENSG00000185950	Transcript	ENST00000375856.3	protein_coding	1/2	-	ENST00000375856.3:c.3561G>A	ENSP00000365016.3:p.Glu1187%3D	4076	3561	1187	E	gaG/gaA	-	-	-1	-	HGNC	6126	YES	-	-	-	CCDS9510.1	ENSP00000365016	Q9Y4H2	Q9UP29,Q8TF73	UPI000006E4A8	-	-	hmmpanther:PTHR10614,hmmpanther:PTHR10614:SF7	-
279	1	chr1:145528319	ITGA10	T	G	0.005556	0	1	89	0.01111	0.01105	1	1:145528319-145528319	T	stop_gained	HIGH	ITGA10	ENSG00000143127	Transcript	ENST00000369304.3	protein_coding	4/30	-	ENST00000369304.3:c.340G>T	ENSP00000358310.3:p.Glu114Ter	515	340	114	E/*	Gag/Tag	-	-	1	-	HGNC	6135	YES	-	-	-	CCDS918.1	ENSP00000358310	O75578	-	UPI000013D8D1	-	-	Gene3D:3nigC00,PROSITE_profiles:PS51470,hmmpanther:PTHR23220,hmmpanther:PTHR23220:SF26,Superfamily_domains:SSF69318	-
280	1	chr1:145528348	ITGA10	A	G	0.005556	0	1	89	0.01111	0.01105	1	1:145528348-145528348	A	splice_region_variant,intron_variant	LOW	ITGA10	ENSG00000143127	Transcript	ENST00000369304.3	protein_coding	-	4/29	ENST00000369304.3:c.366+3G>A	-	-	-	-	-	-	-	-	1	-	HGNC	6135	YES	-	-	-	CCDS918.1	ENSP00000358310	O75578	-	UPI000013D8D1	-	-	-	-
282	1	chr1:145530939	ITGA10	T	C	0.02222	0	4	86	0.04444	0.04346	1	1:145530939-145530939	T	missense_variant	MODERATE	ITGA10	ENSG00000143127	Transcript	ENST00000369304.3	protein_coding	7/30	-	ENST00000369304.3:c.671C>T	ENSP00000358310.3:p.Thr224Met	846	671	224	T/M	aCg/aTg	-	-	1	-	HGNC	6135	YES	-	-	-	CCDS918.1	ENSP00000358310	O75578	-	UPI000013D8D1	deleterious(0)	probably_damaging(0.993)	Pfam_domain:PF00092,PROSITE_profiles:PS50234,hmmpanther:PTHR23220,hmmpanther:PTHR23220:SF26,SMART_domains:SM00327,Superfamily_domains:SSF53300	-
286	1	chr1:145533894	ITGA10	-	C	0.01667	0	3	87	0.03333	0.03278	1	1:145533893-145533894	-	frameshift_variant	HIGH	ITGA10	ENSG00000143127	Transcript	ENST00000369304.3	protein_coding	13/30	-	ENST00000369304.3:c.1543del	ENSP00000358310.3:p.Gln515ArgfsTer13	1715	1540	514	P/X	Ccc/cc	-	-	1	-	HGNC	6135	YES	-	-	-	CCDS918.1	ENSP00000358310	O75578	-	UPI000013D8D1	-	-	Gene3D:3nigC00,PROSITE_profiles:PS51470,hmmpanther:PTHR23220,hmmpanther:PTHR23220:SF26,SMART_domains:SM00191,Superfamily_domains:SSF69318	3
838	3	chr3:37567515	ITGA9	C	A	0.005556	0	1	89	0.01111	0.01105	1	3:37567515-37567515	C	splice_acceptor_variant	HIGH	ITGA9	ENSG00000144668	Transcript	ENST00000264741.5	protein_coding	-	12/27	ENST00000264741.5:c.1328-2A>C	-	-	-	-	-	-	-	-	1	-	HGNC	6145	YES	-	-	-	CCDS2669.1	ENSP00000264741	Q13797	-	UPI00001AE8BB	-	-	-	-
848	3	chr3:37791907	ITGA9	A	C	0.005556	0	1	89	0.01111	0.01105	1	3:37791907-37791907	A	intron_variant	MODIFIER	ITGA9	ENSG00000144668	Transcript	ENST00000264741.5	protein_coding	-	22/27	ENST00000264741.5:c.2434-46C>A	-	-	-	-	-	-	-	-	1	-	HGNC	6145	YES	-	-	-	CCDS2669.1	ENSP00000264741	Q13797	-	UPI00001AE8BB	-	-	-	-
4083	21	chr21:46327067	ITGB2	A	-	0.02222	2	0	88	0	0.04346	9.469e-005	21:46327066-46327066	A	intron_variant	MODIFIER	ITGB2	ENSG00000160255	Transcript	ENST00000397850.2	protein_coding	-	4/16	ENST00000397850.2:c.148-57_148-56insT	-	-	-	-	-	-	-	-	-1	-	HGNC	6155	YES	-	-	-	CCDS13716.1	ENSP00000380948	P05107	Q96PT7,E7EVZ9,E5RK54,E5RK25,E5RIG7,E5RHT0,E5RHE6,E5RFI0	UPI000016A19B	-	-	-	-
3651	17	chr17:45360865	ITGB3	A	C	0.005556	0	1	89	0.01111	0.01105	1	17:45360865-45360865	A	missense_variant	MODERATE	ITGB3	ENSG00000259207	Transcript	ENST00000559488.1	protein_coding	3/15	-	ENST00000559488.1:c.311C>A	ENSP00000452786.1:p.Ser104Tyr	327	311	104	S/Y	tCc/tAc	-	-	1	-	HGNC	6156	YES	-	-	-	CCDS11511.1	ENSP00000452786	P05106	F2X0V0,F1C634,F1C632,F1C630	UPI000013D240	tolerated(0.05)	possibly_damaging(0.451)	hmmpanther:PTHR10082:SF25,hmmpanther:PTHR10082,Pfam_domain:PF00362,PIRSF_domain:PIRSF002512,SMART_domains:SM00187	-
3652	17	chr17:45361773	ITGB3	T	G	0.005556	0	1	89	0.01111	0.01105	1	17:45361773-45361773	T	intron_variant	MODIFIER	ITGB3	ENSG00000259207	Transcript	ENST00000559488.1	protein_coding	-	3/14	ENST00000559488.1:c.362-36G>T	-	-	-	-	-	-	-	-	1	-	HGNC	6156	YES	-	-	-	CCDS11511.1	ENSP00000452786	P05106	F2X0V0,F1C634,F1C632,F1C630	UPI000013D240	-	-	-	-
3662	17	chr17:45377857	ITGB3	C	T	0.005556	0	1	89	0.01111	0.01105	1	17:45377857-45377857	C	missense_variant	MODERATE	ITGB3	ENSG00000259207	Transcript	ENST00000559488.1	protein_coding	12/15	-	ENST00000559488.1:c.1927T>C	ENSP00000452786.1:p.Cys643Arg	1943	1927	643	C/R	Tgt/Cgt	-	-	1	-	HGNC	6156	YES	-	-	-	CCDS11511.1	ENSP00000452786	P05106	F2X0V0,F1C634,F1C632,F1C630	UPI000013D240	deleterious(0)	probably_damaging(1)	hmmpanther:PTHR10082:SF25,hmmpanther:PTHR10082,Pfam_domain:PF07965,PIRSF_domain:PIRSF002512,Superfamily_domains:0039775	-
3663	17	chr17:45377881	ITGB3	A	C	0.005556	0	1	89	0.01111	0.01105	1	17:45377881-45377881	A	missense_variant	MODERATE	ITGB3	ENSG00000259207	Transcript	ENST00000559488.1	protein_coding	12/15	-	ENST00000559488.1:c.1951C>A	ENSP00000452786.1:p.Leu651Ile	1967	1951	651	L/I	Cta/Ata	-	-	1	-	HGNC	6156	YES	-	-	-	CCDS11511.1	ENSP00000452786	P05106	F2X0V0,F1C634,F1C632,F1C630	UPI000013D240	tolerated(0.15)	benign(0.355)	hmmpanther:PTHR10082:SF25,hmmpanther:PTHR10082,Pfam_domain:PF07965,PIRSF_domain:PIRSF002512,Superfamily_domains:0039775	-
2368	9	chr9:5081778	JAK2	TA	CT	0.01111	1	0	89	0	0.02198	0.005587	9:5081778-5081779	TA	stop_gained	HIGH	JAK2	ENSG00000096968	Transcript	ENST00000381652.3	protein_coding	19/25	-	ENST00000381652.3:c.2488_2489delinsTA	ENSP00000371067.3:p.Leu830Ter	2982-2983	2488-2489	830	L/*	CTg/TAg	-	-	1	-	HGNC	6192	YES	-	-	-	CCDS6457.1	ENSP00000371067	O60674	Q8IXP2,F5H5U8	UPI000012DA9E	-	-	PIRSF_domain:PIRSF000636,hmmpanther:PTHR24418,hmmpanther:PTHR24418:SF179	-
2370	9	chr9:5090443	JAK2	G	A	0.005556	0	1	89	0.01111	0.01105	1	9:5090443-5090443	G	splice_region_variant,intron_variant	LOW	JAK2	ENSG00000096968	Transcript	ENST00000381652.3	protein_coding	-	20/24	ENST00000381652.3:c.2762-3A>G	-	-	-	-	-	-	-	-	1	-	HGNC	6192	YES	-	-	-	CCDS6457.1	ENSP00000371067	O60674	Q8IXP2,F5H5U8	UPI000012DA9E	-	-	-	-
2171	8	chr8:41791041	KAT6A	A	-	0.01111	1	0	89	0	0.02198	0.005587	8:41791040-41791040	A	frameshift_variant	HIGH	KAT6A	ENSG00000083168	Transcript	ENST00000396930.3	protein_coding	18/18	-	ENST00000396930.3:c.4697_4698insT	ENSP00000380136.3:p.Ser1567LysfsTer80	5241-5242	4697-4698	1566	P/PX	cca/ccTa	-	-	-1	-	HGNC	13013	YES	-	-	-	CCDS6124.1	ENSP00000380136	Q92794	A5PKX7	UPI000013D666	-	-	hmmpanther:PTHR10615,hmmpanther:PTHR10615:SF26	-
2615	10	chr10:76735416	KAT6B	-	T	0.06667	1	10	79	0.1111	0.1244	0.3243	10:76735415-76735416	-	frameshift_variant	HIGH	KAT6B	ENSG00000156650	Transcript	ENST00000287239.4	protein_coding	2020-08-18	-	ENST00000287239.4:c.1326del	ENSP00000287239.4:p.Phe442LeufsTer15	1810	1321	441	F/X	Ttt/tt	-	-	1	-	HGNC	17582	YES	-	-	-	CCDS7345.1	ENSP00000287239	Q8WYB5	-	UPI000013DEA0	-	-	hmmpanther:PTHR10615:SF73,hmmpanther:PTHR10615	5
2617	10	chr10:76736004	KAT6B	C	T	0.005556	0	1	89	0.01111	0.01105	1	10:76736004-76736004	C	missense_variant	MODERATE	KAT6B	ENSG00000156650	Transcript	ENST00000287239.4	protein_coding	8/18	-	ENST00000287239.4:c.1909T>C	ENSP00000287239.4:p.Tyr637His	2398	1909	637	Y/H	Tat/Cat	-	-	1	-	HGNC	17582	YES	-	-	-	CCDS7345.1	ENSP00000287239	Q8WYB5	-	UPI000013DEA0	tolerated(0.44)	benign(0.394)	hmmpanther:PTHR10615:SF73,hmmpanther:PTHR10615	-
2618	10	chr10:76744954	KAT6B	-	A	0.005556	0	1	89	0.01111	0.01105	1	10:76744953-76744954	-	frameshift_variant	HIGH	KAT6B	ENSG00000156650	Transcript	ENST00000287239.4	protein_coding	12/18	-	ENST00000287239.4:c.2495del	ENSP00000287239.4:p.Asn832MetfsTer27	2979	2490	830	T/X	acA/ac	-	-	1	-	HGNC	17582	YES	-	-	-	CCDS7345.1	ENSP00000287239	Q8WYB5	-	UPI000013DEA0	-	-	hmmpanther:PTHR10615:SF73,hmmpanther:PTHR10615,Pfam_domain:PF01853,Gene3D:3.40.630.30,Superfamily_domains:SSF55729	5
2619	10	chr10:76744958	KAT6B	T	A	0.005556	0	1	89	0.01111	0.01105	1	10:76744958-76744958	T	missense_variant	MODERATE	KAT6B	ENSG00000156650	Transcript	ENST00000287239.4	protein_coding	12/18	-	ENST00000287239.4:c.2494A>T	ENSP00000287239.4:p.Asn832Tyr	2983	2494	832	N/Y	Aat/Tat	-	-	1	-	HGNC	17582	YES	-	-	-	CCDS7345.1	ENSP00000287239	Q8WYB5	-	UPI000013DEA0	deleterious(0.02)	probably_damaging(0.999)	hmmpanther:PTHR10615:SF73,hmmpanther:PTHR10615,Pfam_domain:PF01853,Gene3D:3.40.630.30,Superfamily_domains:SSF55729	-
2620	10	chr10:76744965	KAT6B	G	A	0.01111	0	2	88	0.02222	0.02198	1	10:76744965-76744965	G	missense_variant	MODERATE	KAT6B	ENSG00000156650	Transcript	ENST00000287239.4	protein_coding	12/18	-	ENST00000287239.4:c.2501A>G	ENSP00000287239.4:p.Glu834Gly	2990	2501	834	E/G	gAa/gGa	-	-	1	-	HGNC	17582	YES	-	-	-	CCDS7345.1	ENSP00000287239	Q8WYB5	-	UPI000013DEA0	tolerated(0.07)	probably_damaging(0.991)	hmmpanther:PTHR10615:SF73,hmmpanther:PTHR10615,Pfam_domain:PF01853,Gene3D:3.40.630.30,Superfamily_domains:SSF55729	-
4214	23	chrX:53245059	KDM5C	T	C	0	0	0	35	0	0	1	X:53245059-53245059	T	missense_variant	MODERATE	KDM5C	ENSG00000126012	Transcript	ENST00000375401.3	protein_coding	7/26	-	ENST00000375401.3:c.881G>A	ENSP00000364550.3:p.Ser294Asn	1414	881	294	S/N	aGc/aAc	-	-	-1	-	HGNC	11114	YES	-	-	-	CCDS14351.1	ENSP00000364550	P41229	-	UPI000013CBE3	tolerated(0.45)	benign(0.024)	hmmpanther:PTHR10694:SF31,hmmpanther:PTHR10694	-
4205	23	chrX:44942869	KDM6A	C	T	0.008	0	1	34	0.02857	0.02816	1	X:44942869-44942869	C	intron_variant	MODIFIER	KDM6A	ENSG00000147050	Transcript	ENST00000377967.4	protein_coding	-	23/28	ENST00000377967.4:c.3433+16T>C	-	-	-	-	-	-	-	-	1	-	HGNC	12637	YES	-	-	-	CCDS14265.1	ENSP00000367203	O15550	Q68D33,Q59HG3,Q590H7	UPI000013DA92	-	-	-	-
1122	4	chr4:55953747	KDR	-	CG	0.03333	3	0	87	0	0.06444	2.705e-006	4:55953746-55953748	-	intron_variant	MODIFIER	KDR	ENSG00000128052	Transcript	ENST00000263923.4	protein_coding	-	27/29	ENST00000263923.4:c.3662+26_3662+27del	-	-	-	-	-	-	-	-	-1	-	HGNC	6307	YES	-	-	-	CCDS3497.1	ENSP00000263923	P35968	B4DEK3	UPI000003AE04	-	-	-	-
1126	4	chr4:55970908	KDR	G	T	0.005556	0	1	89	0.01111	0.01105	1	4:55970908-55970908	G	missense_variant	MODERATE	KDR	ENSG00000128052	Transcript	ENST00000263923.4	protein_coding	13/30	-	ENST00000263923.4:c.1889A>C	ENSP00000263923.4:p.Lys630Thr	2185	1889	630	K/T	aAg/aCg	-	-	-1	-	HGNC	6307	YES	-	-	-	CCDS3497.1	ENSP00000263923	P35968	B4DEK3	UPI000003AE04	tolerated(0.07)	benign(0.003)	PROSITE_profiles:PS50835,hmmpanther:PTHR24416,hmmpanther:PTHR24416:SF45,Pfam_domain:PF13895,Gene3D:2.60.40.10,SMART_domains:SM00409,SMART_domains:SM00408,Superfamily_domains:SSF48726	-
1130	4	chr4:55980293	KDR	A	C	0.005556	0	1	89	0.01111	0.01105	1	4:55980293-55980293	A	missense_variant,splice_region_variant	MODERATE	KDR	ENSG00000128052	Transcript	ENST00000263923.4	protein_coding	6/30	-	ENST00000263923.4:c.798G>T	ENSP00000263923.4:p.Lys266Asn	1094	798	266	K/N	aaG/aaT	-	-	-1	-	HGNC	6307	YES	-	-	-	CCDS3497.1	ENSP00000263923	P35968	B4DEK3	UPI000003AE04	tolerated(0.09)	probably_damaging(0.95)	PROSITE_profiles:PS50835,hmmpanther:PTHR24416,hmmpanther:PTHR24416:SF45,Gene3D:2.60.40.10,Pfam_domain:PF07686,SMART_domains:SM00409,SMART_domains:SM00408,Superfamily_domains:SSF48726	-
1131	4	chr4:55981509	KDR	T	-	0.005556	0	1	89	0.01111	0.01105	1	4:55981508-55981508	T	frameshift_variant	HIGH	KDR	ENSG00000128052	Transcript	ENST00000263923.4	protein_coding	4/30	-	ENST00000263923.4:c.428dup	ENSP00000263923.4:p.Asn143LysfsTer31	724-725	428-429	143	N/KX	aac/aaAc	-	-	-1	-	HGNC	6307	YES	-	-	-	CCDS3497.1	ENSP00000263923	P35968	B4DEK3	UPI000003AE04	-	-	hmmpanther:PTHR24416,hmmpanther:PTHR24416:SF45,Gene3D:2.60.40.10,SMART_domains:SM00409,Superfamily_domains:SSF48726	-
3901	19	chr19:10600522	KEAP1	A	G	0.005556	0	1	89	0.01111	0.01105	1	19:10600522-10600522	A	missense_variant	MODERATE	KEAP1	ENSG00000079999	Transcript	ENST00000171111.5	protein_coding	4/6	-	ENST00000171111.5:c.1333C>T	ENSP00000171111.4:p.Pro445Ser	1881	1333	445	P/S	Cca/Tca	-	-	-1	-	HGNC	23177	YES	-	-	-	CCDS12239.1	ENSP00000171111	Q14145	K7ESE0,K7EJD8,K7EJ49	UPI000007139C	deleterious(0.01)	probably_damaging(0.97)	hmmpanther:PTHR24412:SF162,hmmpanther:PTHR24412,Pfam_domain:PF01344,Gene3D:1k3iA02,PIRSF_domain:PIRSF037037,SMART_domains:SM00612,Superfamily_domains:0052715	-
2561	10	chr10:3824270	KLF6	C	T	0.005556	0	1	89	0.01111	0.01105	1	10:3824270-3824270	C	missense_variant	MODERATE	KLF6	ENSG00000067082	Transcript	ENST00000497571.1	protein_coding	2/4	-	ENST00000497571.1:c.239A>G	ENSP00000419923.1:p.Lys80Arg	500	239	80	K/R	aAg/aGg	-	-	-1	-	HGNC	2235	YES	-	-	-	CCDS7060.1	ENSP00000419923	Q99612	Q7Z3W8	UPI00000015BD	tolerated(0.29)	benign(0.031)	hmmpanther:PTHR23223,hmmpanther:PTHR23223:SF139,Low_complexity_(Seg):seg	-
2879	12	chr12:25398279	KRAS	CGC	-	0.005556	0	1	89	0.01111	0.01105	1	12:25398278-25398278	CGC	inframe_insertion	MODERATE	KRAS	ENSG00000133703	Transcript	ENST00000256078.4	protein_coding	2/6	-	ENST00000256078.4:c.38_40dup	ENSP00000256078.4:p.Gly13dup	104-105	40-41	14	V/GV	gta/gGCGta	-	-	-1	-	HGNC	6407	YES	-	-	-	CCDS8703.1	ENSP00000256078	P01116	Q9UM97,Q71SP6,P78460,L7RSL8,I1SRC5	UPI0000133132	-	-	Gene3D:3.40.50.300,Pfam_domain:PF00071,Prints_domain:PR00449,PROSITE_profiles:PS51421,hmmpanther:PTHR24070,hmmpanther:PTHR24070:SF186,SMART_domains:SM00173,SMART_domains:SM00174,SMART_domains:SM00175,SMART_domains:SM00176,Superfamily_domains:SSF52540,TIGRFAM_domain:TIGR00231,Low_complexity_(Seg):seg	-
1249	5	chr5:38481879	LIFR	G	T	0.005556	0	1	89	0.01111	0.01105	1	5:38481879-38481879	G	missense_variant	MODERATE	LIFR	ENSG00000113594	Transcript	ENST00000263409.4	protein_coding	20/20	-	ENST00000263409.4:c.3112A>C	ENSP00000263409.4:p.Asn1038His	3275	3112	1038	N/H	Aat/Cat	-	-	-1	-	HGNC	6597	YES	-	-	-	CCDS3927.1	ENSP00000263409	P42702	D6RJ94,D6RF33	UPI000004CAC2	tolerated(0.12)	benign(0.007)	hmmpanther:PTHR23036,hmmpanther:PTHR23036:SF91	-
1250	5	chr5:38482324	LIFR	T	G	0.005556	0	1	89	0.01111	0.01105	1	5:38482324-38482324	T	splice_region_variant,intron_variant	LOW	LIFR	ENSG00000113594	Transcript	ENST00000263409.4	protein_coding	-	19/19	ENST00000263409.4:c.2671-4C>A	-	-	-	-	-	-	-	-	-1	-	HGNC	6597	YES	-	-	-	CCDS3927.1	ENSP00000263409	P42702	D6RJ94,D6RF33	UPI000004CAC2	-	-	-	-
1252	5	chr5:38486091	LIFR	T	A	0.005556	0	1	89	0.01111	0.01105	1	5:38486091-38486091	T	intron_variant	MODIFIER	LIFR	ENSG00000113594	Transcript	ENST00000263409.4	protein_coding	-	16/19	ENST00000263409.4:c.2336-9T>A	-	-	-	-	-	-	-	-	-1	-	HGNC	6597	YES	-	-	-	CCDS3927.1	ENSP00000263409	P42702	D6RJ94,D6RF33	UPI000004CAC2	-	-	-	-
1256	5	chr5:38499715	LIFR	A	G	0.005556	0	1	89	0.01111	0.01105	1	5:38499715-38499715	A	intron_variant	MODIFIER	LIFR	ENSG00000113594	Transcript	ENST00000263409.4	protein_coding	-	11/19	ENST00000263409.4:c.1601-30C>T	-	-	-	-	-	-	-	-	-1	-	HGNC	6597	YES	-	-	-	CCDS3927.1	ENSP00000263409	P42702	D6RJ94,D6RF33	UPI000004CAC2	-	-	-	-
1258	5	chr5:38502822	LIFR	C	G	0.005556	0	1	89	0.01111	0.01105	1	5:38502822-38502822	C	missense_variant	MODERATE	LIFR	ENSG00000113594	Transcript	ENST00000263409.4	protein_coding	11/20	-	ENST00000263409.4:c.1517C>G	ENSP00000263409.4:p.Thr506Ser	1680	1517	506	T/S	aCt/aGt	-	-	-1	-	HGNC	6597	YES	-	-	-	CCDS3927.1	ENSP00000263409	P42702	D6RJ94,D6RF33	UPI000004CAC2	tolerated(0.35)	benign(0.084)	Superfamily_domains:SSF49265,SMART_domains:SM00060,Pfam_domain:PF00041,Gene3D:2.60.40.10,hmmpanther:PTHR23036,hmmpanther:PTHR23036:SF91,PROSITE_profiles:PS50853	-
1137	4	chr4:62599099	LPHN3	G	A	0.005556	0	1	89	0.01111	0.01105	1	4:62599099-62599099	G	missense_variant	MODERATE	LPHN3	ENSG00000150471	Transcript	ENST00000514591.1	protein_coding	7/25	-	ENST00000514591.1:c.1022A>G	ENSP00000422533.1:p.Tyr341Cys	1351	1022	341	Y/C	tAc/tGc	-	-	1	-	HGNC	20974	YES	-	-	-	CCDS54768.1	ENSP00000422533	-	Q4W5J9,E9PE04	UPI00016278EF	deleterious(0)	probably_damaging(0.999)	PROSITE_profiles:PS51132,hmmpanther:PTHR12011,hmmpanther:PTHR12011:SF60,Pfam_domain:PF02191,SMART_domains:SM00284	-
1150	4	chr4:62897317	LPHN3	A	C	0.005556	0	1	89	0.01111	0.01105	1	4:62897317-62897317	A	missense_variant	MODERATE	LPHN3	ENSG00000150471	Transcript	ENST00000514591.1	protein_coding	22/25	-	ENST00000514591.1:c.3376C>A	ENSP00000422533.1:p.Leu1126Ile	3705	3376	1126	L/I	Cta/Ata	-	-	1	-	HGNC	20974	YES	-	-	-	CCDS54768.1	ENSP00000422533	-	Q4W5J9,E9PE04	UPI00016278EF	deleterious(0)	probably_damaging(0.978)	PROSITE_profiles:PS50261,hmmpanther:PTHR12011,hmmpanther:PTHR12011:SF60,PROSITE_patterns:PS00650,Superfamily_domains:SSF81321,Prints_domain:PR00249	-
597	2	chr2:141079482	LRP1B	G	T	0.005556	0	1	89	0.01111	0.01105	1	2:141079482-141079482	G	intron_variant	MODIFIER	LRP1B	ENSG00000168702	Transcript	ENST00000389484.3	protein_coding	-	82/90	ENST00000389484.3:c.12640+50A>C	-	-	-	-	-	-	-	-	-1	-	HGNC	6693	YES	-	-	-	CCDS2182.1	ENSP00000374135	Q9NZR2	Q8WY27,Q8WY26,Q580W7,Q53TB8,Q53S76,Q53S73,Q53S26,Q53RL0,Q53RG4,Q53RA0,Q53QP5,Q53QM8,Q4ZG53,Q4ZFV5	UPI00001B045B	-	-	-	-
606	2	chr2:141202026	LRP1B	CA	AT	0.07778	7	0	83	0	0.1435	2.919e-011	2:141202026-141202027	CA	splice_region_variant,intron_variant	LOW	LRP1B	ENSG00000168702	Transcript	ENST00000389484.3	protein_coding	-	64/90	ENST00000389484.3:c.10175-9_10175-8delinsTG	-	-	-	-	-	-	-	-	-1	-	HGNC	6693	YES	-	-	-	CCDS2182.1	ENSP00000374135	Q9NZR2	Q8WY27,Q8WY26,Q580W7,Q53TB8,Q53S76,Q53S73,Q53S26,Q53RL0,Q53RG4,Q53RA0,Q53QP5,Q53QM8,Q4ZG53,Q4ZFV5	UPI00001B045B	-	-	-	-
607	2	chr2:141214069	LRP1B	G	C	0.005556	0	1	89	0.01111	0.01105	1	2:141214069-141214069	G	synonymous_variant	LOW	LRP1B	ENSG00000168702	Transcript	ENST00000389484.3	protein_coding	62/91	-	ENST00000389484.3:c.9918G>C	ENSP00000374135.3:p.Leu3306%3D	10890	9918	3306	L	ctG/ctC	-	-	-1	-	HGNC	6693	YES	-	-	-	CCDS2182.1	ENSP00000374135	Q9NZR2	Q8WY27,Q8WY26,Q580W7,Q53TB8,Q53S76,Q53S73,Q53S26,Q53RL0,Q53RG4,Q53RA0,Q53QP5,Q53QM8,Q4ZG53,Q4ZFV5	UPI00001B045B	-	-	Pfam_domain:PF14670,Gene3D:2.10.25.10,SMART_domains:SM00181,Superfamily_domains:SSF57184	-
609	2	chr2:141232924	LRP1B	C	T	0.005556	0	1	89	0.01111	0.01105	1	2:141232924-141232924	C	intron_variant	MODIFIER	LRP1B	ENSG00000168702	Transcript	ENST00000389484.3	protein_coding	-	59/90	ENST00000389484.3:c.9426-18A>G	-	-	-	-	-	-	-	-	-1	-	HGNC	6693	YES	-	-	-	CCDS2182.1	ENSP00000374135	Q9NZR2	Q8WY27,Q8WY26,Q580W7,Q53TB8,Q53S76,Q53S73,Q53S26,Q53RL0,Q53RG4,Q53RA0,Q53QP5,Q53QM8,Q4ZG53,Q4ZFV5	UPI00001B045B	-	-	-	-
624	2	chr2:141299350	LRP1B	T	C	0.005556	0	1	89	0.01111	0.01105	1	2:141299350-141299350	T	missense_variant,splice_region_variant	MODERATE	LRP1B	ENSG00000168702	Transcript	ENST00000389484.3	protein_coding	44/91	-	ENST00000389484.3:c.7385G>A	ENSP00000374135.3:p.Ser2462Asn	8357	7385	2462	S/N	aGc/aAc	-	-	-1	-	HGNC	6693	YES	-	-	-	CCDS2182.1	ENSP00000374135	Q9NZR2	Q8WY27,Q8WY26,Q580W7,Q53TB8,Q53S76,Q53S73,Q53S26,Q53RL0,Q53RG4,Q53RA0,Q53QP5,Q53QM8,Q4ZG53,Q4ZFV5	UPI00001B045B	tolerated(0.21)	benign(0)	hmmpanther:PTHR10529,hmmpanther:PTHR10529:SF105,Gene3D:2.120.10.30	-
633	2	chr2:141598592	LRP1B	C	A	0.005556	0	1	89	0.01111	0.01105	1	2:141598592-141598592	C	missense_variant	MODERATE	LRP1B	ENSG00000168702	Transcript	ENST00000389484.3	protein_coding	30/91	-	ENST00000389484.3:c.5009T>G	ENSP00000374135.3:p.Phe1670Cys	5981	5009	1670	F/C	tTt/tGt	-	-	-1	-	HGNC	6693	YES	-	-	-	CCDS2182.1	ENSP00000374135	Q9NZR2	Q8WY27,Q8WY26,Q580W7,Q53TB8,Q53S76,Q53S73,Q53S26,Q53RL0,Q53RG4,Q53RA0,Q53QP5,Q53QM8,Q4ZG53,Q4ZFV5	UPI00001B045B	tolerated(0.18)	possibly_damaging(0.527)	PROSITE_profiles:PS51120,hmmpanther:PTHR10529,hmmpanther:PTHR10529:SF105,Gene3D:2.120.10.30,SMART_domains:SM00135,Superfamily_domains:SSF63825	-
637	2	chr2:141607906	LRP1B	T	A	0.005556	0	1	89	0.01111	0.01105	1	2:141607906-141607906	T	splice_region_variant,intron_variant	LOW	LRP1B	ENSG00000168702	Transcript	ENST00000389484.3	protein_coding	-	28/90	ENST00000389484.3:c.4712-8T>A	-	-	-	-	-	-	-	-	-1	-	HGNC	6693	YES	-	-	-	CCDS2182.1	ENSP00000374135	Q9NZR2	Q8WY27,Q8WY26,Q580W7,Q53TB8,Q53S76,Q53S73,Q53S26,Q53RL0,Q53RG4,Q53RA0,Q53QP5,Q53QM8,Q4ZG53,Q4ZFV5	UPI00001B045B	-	-	-	-
640	2	chr2:141680645	LRP1B	C	A	0.005556	0	1	89	0.01111	0.01105	1	2:141680645-141680645	C	missense_variant	MODERATE	LRP1B	ENSG00000168702	Transcript	ENST00000389484.3	protein_coding	21/91	-	ENST00000389484.3:c.3208T>G	ENSP00000374135.3:p.Leu1070Val	4180	3208	1070	L/V	Ttg/Gtg	-	-	-1	-	HGNC	6693	YES	-	-	-	CCDS2182.1	ENSP00000374135	Q9NZR2	Q8WY27,Q8WY26,Q580W7,Q53TB8,Q53S76,Q53S73,Q53S26,Q53RL0,Q53RG4,Q53RA0,Q53QP5,Q53QM8,Q4ZG53,Q4ZFV5	UPI00001B045B	tolerated(0.14)	probably_damaging(0.927)	PROSITE_profiles:PS50068,hmmpanther:PTHR10529,hmmpanther:PTHR10529:SF105,PROSITE_patterns:PS01209,Gene3D:4.10.400.10,Pfam_domain:PF00057,SMART_domains:SM00192,Superfamily_domains:SSF57424,Prints_domain:PR00261	-
652	2	chr2:141819743	LRP1B	T	C	0.005556	0	1	89	0.01111	0.01105	1	2:141819743-141819743	T	synonymous_variant	LOW	LRP1B	ENSG00000168702	Transcript	ENST00000389484.3	protein_coding	8/91	-	ENST00000389484.3:c.1113G>A	ENSP00000374135.3:p.Gln371%3D	2085	1113	371	Q	caG/caA	-	-	-1	-	HGNC	6693	YES	-	-	-	CCDS2182.1	ENSP00000374135	Q9NZR2	Q8WY27,Q8WY26,Q580W7,Q53TB8,Q53S76,Q53S73,Q53S26,Q53RL0,Q53RG4,Q53RA0,Q53QP5,Q53QM8,Q4ZG53,Q4ZFV5	UPI00001B045B	-	-	PROSITE_profiles:PS51120,hmmpanther:PTHR10529,hmmpanther:PTHR10529:SF105,Gene3D:2.120.10.30,SMART_domains:SM00135,Superfamily_domains:SSF63825	-
655	2	chr2:141986696	LRP1B	A	G	0.005556	0	1	89	0.01111	0.01105	1	2:141986696-141986696	A	intron_variant	MODIFIER	LRP1B	ENSG00000168702	Transcript	ENST00000389484.3	protein_coding	-	6/90	ENST00000389484.3:c.850+56C>T	-	-	-	-	-	-	-	-	-1	-	HGNC	6693	YES	-	-	-	CCDS2182.1	ENSP00000374135	Q9NZR2	Q8WY27,Q8WY26,Q580W7,Q53TB8,Q53S76,Q53S73,Q53S26,Q53RL0,Q53RG4,Q53RA0,Q53QP5,Q53QM8,Q4ZG53,Q4ZFV5	UPI00001B045B	-	-	-	-
656	2	chr2:142004935	LRP1B	C	A	0.005556	0	1	89	0.01111	0.01105	1	2:142004935-142004935	C	intron_variant	MODIFIER	LRP1B	ENSG00000168702	Transcript	ENST00000389484.3	protein_coding	-	4/90	ENST00000389484.3:c.464-12T>G	-	-	-	-	-	-	-	-	-1	-	HGNC	6693	YES	-	-	-	CCDS2182.1	ENSP00000374135	Q9NZR2	Q8WY27,Q8WY26,Q580W7,Q53TB8,Q53S76,Q53S73,Q53S26,Q53RL0,Q53RG4,Q53RA0,Q53QP5,Q53QM8,Q4ZG53,Q4ZFV5	UPI00001B045B	-	-	-	-
661	2	chr2:142888193	LRP1B	TA	GG	0.005556	0	1	89	0.01111	0.01105	1	2:142888193-142888194	TA	intron_variant	MODIFIER	LRP1B	ENSG00000168702	Transcript	ENST00000389484.3	protein_coding	-	1/90	ENST00000389484.3:c.82+23_82+24delinsTA	-	-	-	-	-	-	-	-	-1	-	HGNC	6693	YES	-	-	-	CCDS2182.1	ENSP00000374135	Q9NZR2	Q8WY27,Q8WY26,Q580W7,Q53TB8,Q53S76,Q53S73,Q53S26,Q53RL0,Q53RG4,Q53RA0,Q53QP5,Q53QM8,Q4ZG53,Q4ZFV5	UPI00001B045B	-	-	-	-
881	3	chr3:46501310	LTF	A	C	0.005556	0	1	89	0.01111	0.01105	1	3:46501310-46501310	A	splice_acceptor_variant	HIGH	LTF	ENSG00000012223	Transcript	ENST00000231751.4	protein_coding	-	1/16	ENST00000231751.4:c.44-1G>T	-	-	-	-	-	-	-	-	-1	-	HGNC	6720	YES	-	-	-	CCDS33747.1	ENSP00000231751	P02788	C9J0S5,A8K9U8	UPI000016ABE3	-	-	-	-
920	3	chr3:65376926	MAGI1	T	C	0.005556	0	1	89	0.01111	0.01105	1	3:65376926-65376926	T	synonymous_variant	LOW	MAGI1	ENSG00000151276	Transcript	ENST00000402939.2	protein_coding	14/23	-	ENST00000402939.2:c.2307G>A	ENSP00000385450.2:p.Glu769%3D	2307	2307	769	E	gaG/gaA	-	-	-1	-	HGNC	946	YES	-	-	-	CCDS33780.1	ENSP00000385450	Q96QZ7	-	UPI0000457132	-	-	hmmpanther:PTHR10316,hmmpanther:PTHR10316:SF12	-
2785	11	chr11:95724845	MAML2	C	T	0.005556	0	1	89	0.01111	0.01105	1	11:95724845-95724845	C	missense_variant	MODERATE	MAML2	ENSG00000184384	Transcript	ENST00000524717.1	protein_coding	3/5	-	ENST00000524717.1:c.2182A>G	ENSP00000434552.1:p.Ser728Gly	3467	2182	728	S/G	Agt/Ggt	-	-	-1	-	HGNC	16259	YES	-	-	-	CCDS44714.1	ENSP00000434552	Q8IZL2	-	UPI00001B4EFC	tolerated(0.27)	benign(0)	hmmpanther:PTHR15692,hmmpanther:PTHR15692:SF9,Low_complexity_(Seg):seg	-
2790	11	chr11:95826226	MAML2	A	G	0.005556	0	1	89	0.01111	0.01105	1	11:95826226-95826226	A	synonymous_variant	LOW	MAML2	ENSG00000184384	Transcript	ENST00000524717.1	protein_coding	2/5	-	ENST00000524717.1:c.969C>T	ENSP00000434552.1:p.Asp323%3D	2254	969	323	D	gaC/gaT	-	-	-1	-	HGNC	16259	YES	-	-	-	CCDS44714.1	ENSP00000434552	Q8IZL2	-	UPI00001B4EFC	-	-	hmmpanther:PTHR15692,hmmpanther:PTHR15692:SF9	-
2791	11	chr11:95826390	MAML2	A	G	0.005556	0	1	89	0.01111	0.01105	1	11:95826390-95826390	A	missense_variant	MODERATE	MAML2	ENSG00000184384	Transcript	ENST00000524717.1	protein_coding	2/5	-	ENST00000524717.1:c.805C>T	ENSP00000434552.1:p.Pro269Ser	2090	805	269	P/S	Cca/Tca	-	-	-1	-	HGNC	16259	YES	-	-	-	CCDS44714.1	ENSP00000434552	Q8IZL2	-	UPI00001B4EFC	deleterious(0)	probably_damaging(0.997)	hmmpanther:PTHR15692,hmmpanther:PTHR15692:SF9	-
3270	15	chr15:66782073	MAP2K1	T	C	0.005556	0	1	89	0.01111	0.01105	1	15:66782073-66782073	T	missense_variant	MODERATE	MAP2K1	ENSG00000169032	Transcript	ENST00000307102.5	protein_coding	10/11	-	ENST00000307102.5:c.1040C>T	ENSP00000302486.4:p.Ala347Val	1571	1040	347	A/V	gCa/gTa	-	-	1	-	HGNC	6840	YES	-	-	-	CCDS10216.1	ENSP00000302486	Q02750	A4QPA9	UPI000013EBC9	tolerated(0.21)	benign(0.068)	Gene3D:1.10.510.10,Pfam_domain:PF00069,PROSITE_profiles:PS50011,hmmpanther:PTHR24360,hmmpanther:PTHR24360:SF15,SMART_domains:SM00220,Superfamily_domains:SSF56112	-
441	1	chr1:220808683	MARK1	GC	TT	0.01111	0	2	88	0.02222	0.02198	1	1:220808683-220808684	GC	intron_variant	MODIFIER	MARK1	ENSG00000116141	Transcript	ENST00000366917.4	protein_coding	-	11/17	ENST00000366917.4:c.1123-35_1123-34delinsGC	-	-	-	-	-	-	-	-	1	-	HGNC	6896	YES	-	-	-	CCDS31029.2	ENSP00000355884	Q9P0L2	B4DIB3	UPI0000048D8B	-	-	-	-
3976	19	chr19:45805895	MARK4	A	T	0.005556	0	1	89	0.01111	0.01105	1	19:45805895-45805895	A	missense_variant	MODERATE	MARK4	ENSG00000007047	Transcript	ENST00000262891.4	protein_coding	17/17	-	ENST00000262891.4:c.2186T>A	ENSP00000262891.3:p.Phe729Tyr	2517	2186	729	F/Y	tTc/tAc	-	-	1	-	HGNC	13538	YES	-	-	-	CCDS56097.1	ENSP00000262891	Q96L34	Q96GZ3,K7EKG8,K7EK17	UPI0000044D47	deleterious(0.04)	benign(0.011)	PROSITE_profiles:PS50032,hmmpanther:PTHR24346:SF22,hmmpanther:PTHR24346,Gene3D:3.30.310.80,Pfam_domain:PF02149,Superfamily_domains:SSF103243	-
3807	18	chr18:47793930	MBD1	G	A	0.03333	0	6	84	0.06667	0.06444	1	18:47793930-47793930	G	upstream_gene_variant	MODIFIER	CCDC11	ENSG00000172361	Transcript	ENST00000398545.4	protein_coding	-	-	-	-	-	-	-	-	-	-	1038	-1	-	HGNC	26530	YES	-	-	-	CCDS11940.2	ENSP00000381553	Q96M91	-	UPI000014C50D	-	-	-	-
3813	18	chr18:47801260	MBD1	C	A	0.01111	1	0	89	0	0.02198	0.005587	18:47801260-47801260	C	intron_variant	MODIFIER	MBD1	ENSG00000141644	Transcript	ENST00000590208.1	protein_coding	-	10/15	ENST00000590208.1:c.978+87T>G	-	-	-	-	-	-	-	-	-1	-	HGNC	6916	YES	-	-	-	CCDS59320.1	ENSP00000468785	-	K7ESN0	UPI0001F995B6	-	-	-	-
300	1	chr1:150550722	MCL1	G	A	0.005556	0	1	89	0.01111	0.01105	1	1:150550722-150550722	G	missense_variant,splice_region_variant	MODERATE	MCL1	ENSG00000143384	Transcript	ENST00000369026.2	protein_coding	2/3	-	ENST00000369026.2:c.934T>C	ENSP00000358022.2:p.Trp312Arg	994	934	312	W/R	Tgg/Cgg	-	-	-1	-	HGNC	6943	YES	-	-	-	CCDS957.1	ENSP00000358022	Q07820	B4DG83	UPI000006D775	deleterious(0)	probably_damaging(0.993)	PROSITE_profiles:PS50062,hmmpanther:PTHR11256:SF6,hmmpanther:PTHR11256,PROSITE_patterns:PS01258,Pfam_domain:PF00452,Gene3D:1.10.437.10,SMART_domains:SM00337,Superfamily_domains:SSF56854,Prints_domain:PR01862	-
2755	11	chr11:64572073	MEN1	A	G	0.005556	0	1	89	0.01111	0.01105	1	11:64572073-64572073	A	synonymous_variant	LOW	MEN1	ENSG00000133895	Transcript	ENST00000337652.1	protein_coding	10/10	-	ENST00000337652.1:c.1581C>T	ENSP00000337088.1:p.Val527%3D	2085	1581	527	V	gtC/gtT	-	-	-1	-	HGNC	7010	YES	-	-	-	CCDS8083.1	ENSP00000337088	O00255	Q9GZQ5	UPI0000246DC0	-	-	hmmpanther:PTHR12693,hmmpanther:PTHR12693:SF3,Pfam_domain:PF05053	-
2021	7	chr7:116339867	MET	G	T	0.005556	0	1	89	0.01111	0.01105	1	7:116339867-116339867	G	missense_variant	MODERATE	MET	ENSG00000105976	Transcript	ENST00000318493.6	protein_coding	2/21	-	ENST00000318493.6:c.729T>G	ENSP00000317272.6:p.Asp243Glu	916	729	243	D/E	gaT/gaG	-	-	1	-	HGNC	7029	YES	-	-	-	CCDS47689.1	ENSP00000317272	P08581	Q9UEJ3,B4DPY6	UPI000014033E	deleterious(0.02)	possibly_damaging(0.547)	PROSITE_profiles:PS51004,Gene3D:2.130.10.10,Pfam_domain:PF01403,PIRSF_domain:PIRSF000617,SMART_domains:SM00630,Superfamily_domains:SSF101912	-
2025	7	chr7:116397717	MET	G	C	0.06111	0	11	79	0.1222	0.1148	1	7:116397717-116397717	G	missense_variant	MODERATE	MET	ENSG00000105976	Transcript	ENST00000318493.6	protein_coding	8/21	-	ENST00000318493.6:c.1991C>G	ENSP00000317272.6:p.Pro664Arg	2178	1991	664	P/R	cCg/cGg	-	-	1	-	HGNC	7029	YES	-	-	-	CCDS47689.1	ENSP00000317272	P08581	Q9UEJ3,B4DPY6	UPI000014033E	deleterious(0)	probably_damaging(1)	hmmpanther:PTHR24416:SF261,hmmpanther:PTHR24416,Gene3D:2.60.40.10,Pfam_domain:PF01833,SMART_domains:SM00429,PIRSF_domain:PIRSF000617,Superfamily_domains:SSF81296	-
929	3	chr3:69985829	MITF	C	T	0.005556	0	1	89	0.01111	0.01105	1	3:69985829-69985829	C	intron_variant	MODIFIER	MITF	ENSG00000187098	Transcript	ENST00000352241.4	protein_coding	-	2/9	ENST00000352241.4:c.355-1144T>C	-	-	-	-	-	-	-	-	1	-	HGNC	7105	YES	-	-	-	CCDS43106.1	ENSP00000295600	O75030	C9K0S7	UPI000002ADF8	-	-	-	-
932	3	chr3:70000910	MITF	G	T	0.005556	0	1	89	0.01111	0.01105	1	3:70000910-70000910	G	intron_variant	MODIFIER	MITF	ENSG00000187098	Transcript	ENST00000352241.4	protein_coding	-	6/9	ENST00000352241.4:c.881-71T>G	-	-	-	-	-	-	-	-	1	-	HGNC	7105	YES	-	-	-	CCDS43106.1	ENSP00000295600	O75030	C9K0S7	UPI000002ADF8	-	-	-	-
833	3	chr3:37090047	MLH1	A	T	0.005556	0	1	89	0.01111	0.01105	1	3:37090047-37090047	A	missense_variant	MODERATE	MLH1	ENSG00000076242	Transcript	ENST00000231790.2	protein_coding	17/19	-	ENST00000231790.2:c.1936T>A	ENSP00000231790.2:p.Tyr646Asn	2152	1936	646	Y/N	Tat/Aat	-	-	1	-	HGNC	7127	YES	-	-	-	CCDS2663.1	ENSP00000231790	P40692	Q5GJ64,F2Z298,E7EUC9,C4PFY8,B7Z821,A8W2I7	UPI0000000C7E	deleterious(0)	probably_damaging(1)	hmmpanther:PTHR10073,hmmpanther:PTHR10073:SF12	-
2844	11	chr11:118376178	MLL	T	G	0.005556	0	1	89	0.01111	0.01105	1	11:118376178-118376178	T	missense_variant	MODERATE	KMT2A	ENSG00000118058	Transcript	ENST00000534358.1	protein_coding	27/36	-	ENST00000534358.1:c.9571G>T	ENSP00000436786.1:p.Val3191Phe	9594	9571	3191	V/F	Gtt/Ttt	-	-	1	-	HGNC	7132	YES	-	-	-	CCDS55791.1	ENSP00000436786	Q03164	Q9UPD0,Q9UM91,Q9HBJ4,B4DIJ7	UPI0001E5E732	deleterious_low_confidence(0)	benign(0.34)	PIRSF_domain:PIRSF010354,hmmpanther:PTHR22884,hmmpanther:PTHR22884:SF302	-
2846	11	chr11:118390491	MLL	A	G	0.005556	0	1	89	0.01111	0.01105	1	11:118390491-118390491	A	missense_variant	MODERATE	KMT2A	ENSG00000118058	Transcript	ENST00000534358.1	protein_coding	32/36	-	ENST00000534358.1:c.11305G>A	ENSP00000436786.1:p.Ala3769Thr	11328	11305	3769	A/T	Gct/Act	-	-	1	-	HGNC	7132	YES	-	-	-	CCDS55791.1	ENSP00000436786	Q03164	Q9UPD0,Q9UM91,Q9HBJ4,B4DIJ7	UPI0001E5E732	tolerated(0.06)	probably_damaging(0.996)	PIRSF_domain:PIRSF010354,hmmpanther:PTHR22884,hmmpanther:PTHR22884:SF302	-
2931	12	chr12:49433170	MLL2	C	-	0.01111	1	0	89	0	0.02198	0.005587	12:49433169-49433169	C	intron_variant	MODIFIER	KMT2D	ENSG00000167548	Transcript	ENST00000301067.7	protein_coding	-	32/53	ENST00000301067.7:c.8230-29_8230-28insG	-	-	-	-	-	-	-	-	-1	-	HGNC	7133	YES	-	-	-	CCDS44873.1	ENSP00000301067	O14686	Q6PIA1,Q59FG6,F8VWW4	UPI0000EE84D6	-	-	-	-
2096	7	chr7:151859655	MLL3	A	G	0.005556	0	1	89	0.01111	0.01105	1	7:151859655-151859655	A	synonymous_variant	LOW	KMT2C	ENSG00000055609	Transcript	ENST00000262189.6	protein_coding	43/59	-	ENST00000262189.6:c.11007C>T	ENSP00000262189.6:p.Pro3669%3D	11226	11007	3669	P	ccC/ccT	-	-	-1	-	HGNC	13726	YES	-	-	-	CCDS5931.1	ENSP00000262189	Q8NEZ4	Q6N019,Q75MN6,H0YMU7	UPI0000141B9F	-	-	hmmpanther:PTHR22884,hmmpanther:PTHR22884:SF305	-
2107	7	chr7:151879244	MLL3	-	T	0.04444	4	0	86	0	0.08494	1.095e-007	7:151879243-151879244	-	frameshift_variant	HIGH	KMT2C	ENSG00000055609	Transcript	ENST00000262189.6	protein_coding	36/59	-	ENST00000262189.6:c.5701del	ENSP00000262189.6:p.Met1901TrpfsTer38	5920	5701	1901	M/X	Atg/tg	-	-	-1	-	HGNC	13726	YES	-	-	-	CCDS5931.1	ENSP00000262189	Q8NEZ4	Q6N019,Q75MN6,H0YMU7	UPI0000141B9F	-	-	hmmpanther:PTHR22884,hmmpanther:PTHR22884:SF305	-
2112	7	chr7:151902163	MLL3	T	A	0.01111	1	0	89	0	0.02198	0.005587	7:151902163-151902163	T	intron_variant	MODIFIER	KMT2C	ENSG00000055609	Transcript	ENST00000262189.6	protein_coding	-	25/58	ENST00000262189.6:c.3961+28T>A	-	-	-	-	-	-	-	-	-1	-	HGNC	13726	YES	-	-	-	CCDS5931.1	ENSP00000262189	Q8NEZ4	Q6N019,Q75MN6,H0YMU7	UPI0000141B9F	-	-	-	-
2113	7	chr7:151902164	MLL3	T	A	0.005556	0	1	89	0.01111	0.01105	1	7:151902164-151902164	T	intron_variant	MODIFIER	KMT2C	ENSG00000055609	Transcript	ENST00000262189.6	protein_coding	-	25/58	ENST00000262189.6:c.3961+27T>A	-	-	-	-	-	-	-	-	-1	-	HGNC	13726	YES	-	-	-	CCDS5931.1	ENSP00000262189	Q8NEZ4	Q6N019,Q75MN6,H0YMU7	UPI0000141B9F	-	-	-	-
2114	7	chr7:151902167	MLL3	-	TT	0.005556	0	1	89	0.01111	0.01105	1	7:151902166-151902168	-	intron_variant	MODIFIER	KMT2C	ENSG00000055609	Transcript	ENST00000262189.6	protein_coding	-	25/58	ENST00000262189.6:c.3961+23_3961+24del	-	-	-	-	-	-	-	-	-1	-	HGNC	13726	YES	-	-	-	CCDS5931.1	ENSP00000262189	Q8NEZ4	Q6N019,Q75MN6,H0YMU7	UPI0000141B9F	-	-	-	-
2117	7	chr7:151947941	MLL3	T	C	0.005556	0	1	89	0.01111	0.01105	1	7:151947941-151947941	T	missense_variant	MODERATE	KMT2C	ENSG00000055609	Transcript	ENST00000262189.6	protein_coding	12/59	-	ENST00000262189.6:c.1732G>A	ENSP00000262189.6:p.Asp578Asn	1951	1732	578	D/N	Gat/Aat	-	-	-1	-	HGNC	13726	YES	-	-	-	CCDS5931.1	ENSP00000262189	Q8NEZ4	Q6N019,Q75MN6,H0YMU7	UPI0000141B9F	tolerated_low_confidence(0.08)	benign(0.009)	-	-
2127	7	chr7:151971024	MLL3	A	G	0.005556	0	1	89	0.01111	0.01105	1	7:151971024-151971024	A	intron_variant	MODIFIER	KMT2C	ENSG00000055609	Transcript	ENST00000262189.6	protein_coding	-	6/58	ENST00000262189.6:c.850-72C>T	-	-	-	-	-	-	-	-	-1	-	HGNC	13726	YES	-	-	-	CCDS5931.1	ENSP00000262189	Q8NEZ4	Q6N019,Q75MN6,H0YMU7	UPI0000141B9F	-	-	-	-
2567	10	chr10:21901248	MLLT10	T	-	0.01667	0	3	87	0.03333	0.03278	1	10:21901247-21901247	T	intron_variant	MODIFIER	MLLT10	ENSG00000078403	Transcript	ENST00000307729.7	protein_coding	-	2020-05-22	ENST00000307729.7:c.406-25dup	-	-	-	-	-	-	-	-	1	-	HGNC	16063	YES	-	-	-	CCDS55708.1	ENSP00000307411	P55197	Q71UR7,B4DVS6	UPI00001F8FF7	-	-	-	5
2568	10	chr10:21901253	MLLT10	T	G	0.01667	0	3	87	0.03333	0.03278	1	10:21901253-21901253	T	intron_variant	MODIFIER	MLLT10	ENSG00000078403	Transcript	ENST00000307729.7	protein_coding	-	5/22	ENST00000307729.7:c.406-24G>T	-	-	-	-	-	-	-	-	1	-	HGNC	16063	YES	-	-	-	CCDS55708.1	ENSP00000307411	P55197	Q71UR7,B4DVS6	UPI00001F8FF7	-	-	-	-
2572	10	chr10:22022026	MLLT10	T	A	0.005556	0	1	89	0.01111	0.01105	1	10:22022026-22022026	T	intron_variant	MODIFIER	MLLT10	ENSG00000078403	Transcript	ENST00000307729.7	protein_coding	-	18/22	ENST00000307729.7:c.2407+10A>T	-	-	-	-	-	-	-	-	1	-	HGNC	16063	YES	-	-	-	CCDS55708.1	ENSP00000307411	P55197	Q71UR7,B4DVS6	UPI00001F8FF7	-	-	-	-
76	1	chr1:43803502	MPL	T	C	0.005556	0	1	89	0.01111	0.01105	1	1:43803502-43803502	T	5_prime_UTR_variant	MODIFIER	MPL	ENSG00000117400	Transcript	ENST00000372470.3	protein_coding	1/12	-	ENST00000372470.3:c.-18C>T	-	25	-	-	-	-	-	-	1	-	HGNC	7217	YES	-	-	-	CCDS483.1	ENSP00000361548	P40238	-	UPI000002DB88	-	-	-	-
82	1	chr1:43818486	MPL	T	C	0.005556	0	1	89	0.01111	0.01105	1	1:43818486-43818486	T	downstream_gene_variant	MODIFIER	MPL	ENSG00000117400	Transcript	ENST00000372470.3	protein_coding	-	-	-	-	-	-	-	-	-	-	43	1	-	HGNC	7217	YES	-	-	-	CCDS483.1	ENSP00000361548	P40238	-	UPI000002DB88	-	-	-	-
2781	11	chr11:94224026	MRE11A	G	T	0.005556	0	1	89	0.01111	0.01105	1	11:94224026-94224026	G	missense_variant	MODERATE	MRE11A	ENSG00000020922	Transcript	ENST00000323929.3	protein_coding	3/20	-	ENST00000323929.3:c.126A>C	ENSP00000325863.3:p.Glu42Asp	349	126	42	E/D	gaA/gaC	-	-	-1	-	HGNC	7230	YES	-	-	-	CCDS8299.1	ENSP00000325863	P49959	Q9BS79,F5H742,F5H256	UPI000012F4D3	deleterious(0.01)	probably_damaging(0.999)	hmmpanther:PTHR10139,TIGRFAM_domain:TIGR00583,Gene3D:3.60.21.10,Pfam_domain:PF00149,PIRSF_domain:PIRSF000882,Superfamily_domains:SSF56300	-
538	2	chr2:47639586	MSH2	T	A	0.005556	0	1	89	0.01111	0.01105	1	2:47639586-47639586	T	stop_gained	HIGH	MSH2	ENSG00000095002	Transcript	ENST00000233146.2	protein_coding	4/16	-	ENST00000233146.2:c.679A>T	ENSP00000233146.2:p.Arg227Ter	902	679	227	R/*	Aga/Tga	-	-	1	-	HGNC	7325	YES	-	-	-	CCDS1834.1	ENSP00000233146	P43246	Q53RU4,C9J809,B4DL39	UPI00000405F6	-	-	Gene3D:3.30.420.110,Pfam_domain:PF05188,PIRSF_domain:PIRSF005813,hmmpanther:PTHR11361,hmmpanther:PTHR11361:SF35	-
540	2	chr2:47641570	MSH2	G	A	0.005556	0	1	89	0.01111	0.01105	1	2:47641570-47641570	G	intron_variant	MODIFIER	MSH2	ENSG00000095002	Transcript	ENST00000233146.2	protein_coding	-	5/15	ENST00000233146.2:c.942+13A>G	-	-	-	-	-	-	-	-	1	-	HGNC	7325	YES	-	-	-	CCDS1834.1	ENSP00000233146	P43246	Q53RU4,C9J809,B4DL39	UPI00000405F6	-	-	-	-
542	2	chr2:47643502	MSH2	C	A	0.02222	1	2	87	0.02222	0.04346	0.03342	2:47643502-47643502	C	missense_variant	MODERATE	MSH2	ENSG00000095002	Transcript	ENST00000233146.2	protein_coding	6/16	-	ENST00000233146.2:c.1010A>C	ENSP00000233146.2:p.Gln337Pro	1233	1010	337	Q/P	cAa/cCa	-	-	1	-	HGNC	7325	YES	-	-	-	CCDS1834.1	ENSP00000233146	P43246	Q53RU4,C9J809,B4DL39	UPI00000405F6	deleterious(0.03)	benign(0.33)	Gene3D:1.10.1420.10,Pfam_domain:PF05192,PIRSF_domain:PIRSF005813,hmmpanther:PTHR11361,hmmpanther:PTHR11361:SF35,SMART_domains:SM00533,Superfamily_domains:SSF48334	-
548	2	chr2:47705460	MSH2	-	ACTTCT	0.005556	0	1	89	0.01111	0.01105	1	2:47705459-47705465	-	inframe_deletion	MODERATE	MSH2	ENSG00000095002	Transcript	ENST00000233146.2	protein_coding	14/16	-	ENST00000233146.2:c.2262_2267del	ENSP00000233146.2:p.Ser755_Thr756del	2483-2488	2260-2265	754-755	TS/-	ACTTCT/-	-	-	1	-	HGNC	7325	YES	-	-	-	CCDS1834.1	ENSP00000233146	P43246	Q53RU4,C9J809,B4DL39	UPI00000405F6	-	-	Gene3D:3.40.50.300,Pfam_domain:PF00488,PIRSF_domain:PIRSF005813,PROSITE_patterns:PS00486,hmmpanther:PTHR11361,hmmpanther:PTHR11361:SF35,SMART_domains:SM00534,Superfamily_domains:SSF52540	2
35	1	chr1:11167502	MTOR	C	A	0.005556	0	1	89	0.01111	0.01105	1	1:11167502-11167502	C	3_prime_UTR_variant	MODIFIER	MTOR	ENSG00000198793	Transcript	ENST00000361445.4	protein_coding	58/58	-	ENST00000361445.4:c.*40T>G	-	7767	-	-	-	-	-	-	-1	-	HGNC	3942	YES	-	-	-	CCDS127.1	ENSP00000354558	P42345	Q96QW8,B1AKQ2,B1AKP8	UPI000012ABD3	-	-	-	-
457	1	chr1:236966821	MTR	TT	GG	0.02778	0	5	85	0.05556	0.05401	1	1:236966821-236966822	TT	missense_variant	MODERATE	MTR	ENSG00000116984	Transcript	ENST00000366577.5	protein_coding	2/33	-	ENST00000366577.5:c.128_129delinsTT	ENSP00000355536.5:p.Arg43Leu	522-523	128-129	43	R/L	cGG/cTT	-	-	1	-	HGNC	7468	YES	-	-	-	CCDS1614.1	ENSP00000355536	Q99707	-	UPI0000036BC4	tolerated(0.06)	benign(0.237)	Gene3D:3.20.20.330,Pfam_domain:PF02574,PIRSF_domain:PIRSF000381,PROSITE_profiles:PS50970,hmmpanther:PTHR21091,hmmpanther:PTHR21091:SF97,Superfamily_domains:SSF82282,TIGRFAM_domain:TIGR02082	-
466	1	chr1:237016242	MTR	A	C	0.005556	0	1	89	0.01111	0.01105	1	1:237016242-237016242	A	splice_region_variant,intron_variant	LOW	MTR	ENSG00000116984	Transcript	ENST00000366577.5	protein_coding	-	17/32	ENST00000366577.5:c.1813-6C>A	-	-	-	-	-	-	-	-	1	-	HGNC	7468	YES	-	-	-	CCDS1614.1	ENSP00000355536	Q99707	-	UPI0000036BC4	-	-	-	-
469	1	chr1:237038012	MTR	T	A	0.005556	0	1	89	0.01111	0.01105	1	1:237038012-237038012	T	intron_variant	MODIFIER	MTR	ENSG00000116984	Transcript	ENST00000366577.5	protein_coding	-	23/32	ENST00000366577.5:c.2474-14A>T	-	-	-	-	-	-	-	-	1	-	HGNC	7468	YES	-	-	-	CCDS1614.1	ENSP00000355536	Q99707	-	UPI0000036BC4	-	-	-	-
475	1	chr1:237058719	MTR	G	A	0.005556	0	1	89	0.01111	0.01105	1	1:237058719-237058719	G	missense_variant	MODERATE	MTR	ENSG00000116984	Transcript	ENST00000366577.5	protein_coding	31/33	-	ENST00000366577.5:c.3467A>G	ENSP00000355536.5:p.Glu1156Gly	3861	3467	1156	E/G	gAg/gGg	-	-	1	-	HGNC	7468	YES	-	-	-	CCDS1614.1	ENSP00000355536	Q99707	-	UPI0000036BC4	deleterious(0.03)	probably_damaging(0.998)	Gene3D:2o2kA01,Pfam_domain:PF02965,PIRSF_domain:PIRSF000381,PROSITE_profiles:PS50974,hmmpanther:PTHR21091,hmmpanther:PTHR21091:SF97,Superfamily_domains:SSF56507,TIGRFAM_domain:TIGR02082	-
322	1	chr1:155160052	MUC1	GAC	ACT	0.01111	1	0	89	0	0.02198	0.005587	1:155160052-155160054	GAC	splice_acceptor_variant,coding_sequence_variant	HIGH	MUC1	ENSG00000185499	Transcript	ENST00000368395.1	protein_coding	6/8	5/7	ENST00000368395.1:c.1082-2_1082delinsGTC	-	?-1154	?-1082	?-361	-	-	-	-	-1	-	HGNC	7508	YES	-	-	-	CCDS55640.1	ENSP00000357380	-	Q9UMI8,Q7Z545,Q14877,B1AVQ5	UPI0000038A9F	-	-	-	-
325	1	chr1:155160768	MUC1	G	A	0.005556	0	1	89	0.01111	0.01105	1	1:155160768-155160768	G	synonymous_variant	LOW	MUC1	ENSG00000185499	Transcript	ENST00000368395.1	protein_coding	3/8	-	ENST00000368395.1:c.759T>C	ENSP00000357380.1:p.Ser253%3D	831	759	253	S	tcT/tcC	-	-	-1	-	HGNC	7508	YES	-	-	-	CCDS55640.1	ENSP00000357380	-	Q9UMI8,Q7Z545,Q14877,B1AVQ5	UPI0000038A9F	-	-	hmmpanther:PTHR10006,hmmpanther:PTHR10006:SF7,Gene3D:1ivzA00	-
92	1	chr1:45799181	MUTYH	T	G	0.01111	1	0	89	0	0.02198	0.005587	1:45799181-45799181	T	stop_gained	HIGH	MUTYH	ENSG00000132781	Transcript	ENST00000372098.3	protein_coding	3/16	-	ENST00000372098.3:c.243C>A	ENSP00000361170.3:p.Tyr81Ter	377	243	81	Y/*	taC/taA	-	-	-1	-	HGNC	7527	YES	-	-	-	CCDS520.1	ENSP00000361170	Q9UIF7	E5KP26,Q8TDZ3,Q5T413,D3DPZ6	UPI000006EB4F	-	-	hmmpanther:PTHR10359:SF24,hmmpanther:PTHR10359	-
2338	8	chr8:128753001	MYC	TGA	-	0.01111	1	0	89	0	0.02198	0.005587	8:128753000-128753000	TGA	stop_gained,inframe_insertion	HIGH	MYC	ENSG00000136997	Transcript	ENST00000377970.2	protein_coding	3/3	-	ENST00000377970.2:c.1161_1162insTGA	ENSP00000367207.2:p.Arg387_Ser388insTer	1671-1672	1161-1162	387-388	-/*	-/TGA	-	-	1	-	HGNC	7553	YES	-	-	-	CCDS6359.2	ENSP00000367207	P01106	Q6LBK7,B4E1N7,B3CJ65	UPI0000D624FF	-	-	Coiled-coils_(Ncoils):Coil,PROSITE_profiles:PS50888,hmmpanther:PTHR11514:SF2,hmmpanther:PTHR11514,Pfam_domain:PF00010,Gene3D:4.10.280.10,SMART_domains:SM00353,PIRSF_domain:PIRSF001705,Superfamily_domains:SSF47459,Prints_domain:PR00044	-
2340	8	chr8:128753260	MYC	T	G	0.005556	0	1	89	0.01111	0.01105	1	8:128753260-128753260	T	3_prime_UTR_variant	MODIFIER	MYC	ENSG00000136997	Transcript	ENST00000377970.2	protein_coding	3/3	-	ENST00000377970.2:c.*56G>T	-	1931	-	-	-	-	-	-	1	-	HGNC	7553	YES	-	-	-	CCDS6359.2	ENSP00000367207	P01106	Q6LBK7,B4E1N7,B3CJ65	UPI0000D624FF	-	-	-	-
75	1	chr1:40363605	MYCL1	A	C	0.005556	0	1	89	0.01111	0.01105	1	1:40363605-40363605	A	missense_variant	MODERATE	MYCL	ENSG00000116990	Transcript	ENST00000397332.2	protein_coding	3/3	-	ENST00000397332.2:c.624G>T	ENSP00000380494.2:p.Arg208Ser	749	624	208	R/S	agG/agT	-	-	-1	-	HGNC	7555	YES	-	-	-	CCDS53300.1	ENSP00000380494	-	Q86YL9,E9PQS5	UPI000047097E	deleterious(0.02)	possibly_damaging(0.624)	hmmpanther:PTHR11514,hmmpanther:PTHR11514:SF1,Pfam_domain:PF01056,PIRSF_domain:PIRSF001705	-
490	2	chr2:16086048	MYCN	A	G	0.005556	0	1	89	0.01111	0.01105	1	2:16086048-16086048	A	synonymous_variant	LOW	MYCN	ENSG00000134323	Transcript	ENST00000281043.3	protein_coding	3/3	-	ENST00000281043.3:c.1224G>A	ENSP00000281043.3:p.Val408%3D	1521	1224	408	V	gtG/gtA	-	-	1	-	HGNC	7559	YES	-	-	-	CCDS1687.1	ENSP00000281043	P04198	Q9UMQ5,Q7Z7Q9,Q53XS5	UPI000012FAF8	-	-	Gene3D:4.10.280.10,Pfam_domain:PF00010,PIRSF_domain:PIRSF001705,PROSITE_profiles:PS50888,hmmpanther:PTHR11514,hmmpanther:PTHR11514:SF3,SMART_domains:SM00353,Superfamily_domains:SSF47459	-
3376	16	chr16:15808865	MYH11	G	A	0.005556	0	1	89	0.01111	0.01105	1	16:15808865-15808865	G	missense_variant	MODERATE	MYH11	ENSG00000133392	Transcript	ENST00000396324.3	protein_coding	41/42	-	ENST00000396324.3:c.5708T>C	ENSP00000379616.3:p.Ile1903Thr	5796	5708	1903	I/T	aTc/aCc	-	-	-1	-	HGNC	7569	YES	-	-	-	CCDS45423.1	ENSP00000379616	P35749	Q68D89,Q66K75	UPI00005B7237	tolerated(0.31)	benign(0.158)	Coiled-coils_(Ncoils):Coil,Pfam_domain:PF01576,hmmpanther:PTHR13140:SF335,hmmpanther:PTHR13140	-
3391	16	chr16:15826573	MYH11	A	G	0.005556	0	1	89	0.01111	0.01105	1	16:15826573-15826573	A	splice_region_variant,intron_variant	LOW	MYH11	ENSG00000133392	Transcript	ENST00000396324.3	protein_coding	-	27/41	ENST00000396324.3:c.3528-8C>T	-	-	-	-	-	-	-	-	-1	-	HGNC	7569	YES	-	-	-	CCDS45423.1	ENSP00000379616	P35749	Q68D89,Q66K75	UPI00005B7237	-	-	-	-
4122	22	chr22:36690119	MYH9	CC	GT	0.005556	0	1	89	0.01111	0.01105	1	22:36690119-36690120	CC	intron_variant	MODIFIER	MYH9	ENSG00000100345	Transcript	ENST00000216181.5	protein_coding	-	28/40	ENST00000216181.5:c.3837+18_3837+19delinsGG	-	-	-	-	-	-	-	-	-1	-	HGNC	7579	YES	-	-	-	CCDS13927.1	ENSP00000216181	P35579	Q9UMJ0,B1AH99	UPI000012FB80	-	-	-	-
2225	8	chr8:71041018	NCOA2	A	C	0.005556	0	1	89	0.01111	0.01105	1	8:71041018-71041018	A	synonymous_variant	LOW	NCOA2	ENSG00000140396	Transcript	ENST00000452400.2	protein_coding	17/23	-	ENST00000452400.2:c.3522G>T	ENSP00000399968.2:p.Pro1174%3D	3704	3522	1174	P	ccG/ccT	-	-	-1	-	HGNC	7669	YES	-	-	-	CCDS47872.1	ENSP00000399968	Q15596	-	UPI000012FE42	-	-	hmmpanther:PTHR10684:SF2,hmmpanther:PTHR10684,PIRSF_domain:PIRSF038181	-
2226	8	chr8:71041202	NCOA2	C	T	0.005556	0	1	89	0.01111	0.01105	1	8:71041202-71041202	C	missense_variant	MODERATE	NCOA2	ENSG00000140396	Transcript	ENST00000452400.2	protein_coding	17/23	-	ENST00000452400.2:c.3338A>G	ENSP00000399968.2:p.Asp1113Gly	3520	3338	1113	D/G	gAt/gGt	-	-	-1	-	HGNC	7669	YES	-	-	-	CCDS47872.1	ENSP00000399968	Q15596	-	UPI000012FE42	deleterious(0.01)	possibly_damaging(0.497)	hmmpanther:PTHR10684:SF2,hmmpanther:PTHR10684,Pfam_domain:PF08815,Gene3D:1kbhA00,PIRSF_domain:PIRSF038181,Superfamily_domains:SSF69125	-
2231	8	chr8:71075661	NCOA2	G	A	0.005556	0	1	89	0.01111	0.01105	1	8:71075661-71075661	G	intron_variant	MODIFIER	NCOA2	ENSG00000140396	Transcript	ENST00000452400.2	protein_coding	-	8/22	ENST00000452400.2:c.832+39T>C	-	-	-	-	-	-	-	-	-1	-	HGNC	7669	YES	-	-	-	CCDS47872.1	ENSP00000399968	Q15596	-	UPI000012FE42	-	-	-	-
2232	8	chr8:71075779	NCOA2	C	G	0.01111	1	0	89	0	0.02198	0.005587	8:71075779-71075779	C	missense_variant	MODERATE	NCOA2	ENSG00000140396	Transcript	ENST00000452400.2	protein_coding	8/23	-	ENST00000452400.2:c.753C>G	ENSP00000399968.2:p.Cys251Trp	935	753	251	C/W	tgC/tgG	-	-	-1	-	HGNC	7669	YES	-	-	-	CCDS47872.1	ENSP00000399968	Q15596	-	UPI000012FE42	deleterious(0)	probably_damaging(0.999)	hmmpanther:PTHR10684:SF2,hmmpanther:PTHR10684,PIRSF_domain:PIRSF038181	-
2234	8	chr8:71128917	NCOA2	G	A	0.005556	0	1	89	0.01111	0.01105	1	8:71128917-71128917	G	missense_variant	MODERATE	NCOA2	ENSG00000140396	Transcript	ENST00000452400.2	protein_coding	3/23	-	ENST00000452400.2:c.64T>C	ENSP00000399968.2:p.Cys22Arg	246	64	22	C/R	Tgt/Cgt	-	-	-1	-	HGNC	7669	YES	-	-	-	CCDS47872.1	ENSP00000399968	Q15596	-	UPI000012FE42	tolerated(0.07)	possibly_damaging(0.483)	hmmpanther:PTHR10684:SF2,hmmpanther:PTHR10684,PIRSF_domain:PIRSF038181	-
2593	10	chr10:51584910	NCOA4	A	G	0.01111	0	2	88	0.02222	0.02198	1	10:51584910-51584910	A	missense_variant	MODERATE	NCOA4	ENSG00000138293	Transcript	ENST00000452682.1	protein_coding	9/12	-	ENST00000452682.1:c.1057G>A	ENSP00000395465.1:p.Val353Met	1309	1057	353	V/M	Gtg/Atg	-	-	1	-	HGNC	7671	YES	-	-	-	CCDS44394.1	ENSP00000395465	Q13772	-	UPI0001932817	tolerated(0.07)	probably_damaging(0.921)	hmmpanther:PTHR17085,hmmpanther:PTHR17085:SF2	-
2595	10	chr10:51586458	NCOA4	ATAT	-	0.005556	0	1	89	0.01111	0.01105	1	10:51586457-51586457	ATAT	intron_variant	MODIFIER	NCOA4	ENSG00000138293	Transcript	ENST00000452682.1	protein_coding	-	10/11	ENST00000452682.1:c.1887+47_1887+48insTATA	-	-	-	-	-	-	-	-	1	-	HGNC	7671	YES	-	-	-	CCDS44394.1	ENSP00000395465	Q13772	-	UPI0001932817	-	-	-	1
3599	17	chr17:29527684	NF1	A	G	0.005556	0	1	89	0.01111	0.01105	1	17:29527684-29527684	A	intron_variant	MODIFIER	NF1	ENSG00000196712	Transcript	ENST00000358273.4	protein_coding	-	9/57	ENST00000358273.4:c.1062+71G>A	-	-	-	-	-	-	-	-	1	-	HGNC	7765	YES	-	-	-	CCDS42292.1	ENSP00000351015	P21359	Q9UMU3,Q4W6X4,K7EP94	UPI000012FFAE	-	-	-	-
3604	17	chr17:29563074	NF1	TTG	-	0.01111	0	2	88	0.02222	0.02198	1	17:29563073-29563073	TTG	intron_variant	MODIFIER	NF1	ENSG00000196712	Transcript	ENST00000358273.4	protein_coding	-	29/57	ENST00000358273.4:c.3974+35_3974+36insTGT	-	-	-	-	-	-	-	-	1	-	HGNC	7765	YES	-	-	-	CCDS42292.1	ENSP00000351015	P21359	Q9UMU3,Q4W6X4,K7EP94	UPI000012FFAE	-	-	-	1
3615	17	chr17:29684016	NF1	G	T	0.005556	0	1	89	0.01111	0.01105	1	17:29684016-29684016	G	missense_variant	MODERATE	NF1	ENSG00000196712	Transcript	ENST00000358273.4	protein_coding	53/58	-	ENST00000358273.4:c.7777T>G	ENSP00000351015.4:p.Leu2593Val	8160	7777	2593	L/V	Tta/Gta	-	-	1	-	HGNC	7765	YES	-	-	-	CCDS42292.1	ENSP00000351015	P21359	Q9UMU3,Q4W6X4,K7EP94	UPI000012FFAE	tolerated_low_confidence(0.22)	probably_damaging(0.931)	hmmpanther:PTHR10194,hmmpanther:PTHR10194:SF60	-
670	2	chr2:178096253	NFE2L2	G	A	0.005556	0	1	89	0.01111	0.01105	1	2:178096253-178096253	G	missense_variant	MODERATE	NFE2L2	ENSG00000116044	Transcript	ENST00000397062.3	protein_coding	5/5	-	ENST00000397062.3:c.1078T>C	ENSP00000380252.3:p.Ser360Pro	1633	1078	360	S/P	Tca/Cca	-	-	-1	-	HGNC	7782	YES	-	-	-	CCDS42782.1	ENSP00000380252	Q16236	Q9BZF8,K7ER33,C9J1A8,C9J0Y1	UPI000012FFD0	deleterious(0)	probably_damaging(0.933)	hmmpanther:PTHR24411,hmmpanther:PTHR24411:SF3	-
1176	4	chr4:103533242	NFKB1	G	T	0.005556	0	1	89	0.01111	0.01105	1	4:103533242-103533242	G	missense_variant	MODERATE	NFKB1	ENSG00000109320	Transcript	ENST00000226574.4	protein_coding	21/24	-	ENST00000226574.4:c.2394T>G	ENSP00000226574.4:p.Phe798Leu	2861	2394	798	F/L	ttT/ttG	-	-	1	-	HGNC	7794	YES	-	-	-	CCDS3657.1	ENSP00000226574	P19838	D6RF93,D6RC45	UPI0000192724	tolerated(0.7)	benign(0.012)	hmmpanther:PTHR24169:SF9,hmmpanther:PTHR24169	-
1177	4	chr4:103533291	NFKB1	A	C	0.005556	0	1	89	0.01111	0.01105	1	4:103533291-103533291	A	intron_variant	MODIFIER	NFKB1	ENSG00000109320	Transcript	ENST00000226574.4	protein_coding	-	21/23	ENST00000226574.4:c.2419+24C>A	-	-	-	-	-	-	-	-	1	-	HGNC	7794	YES	-	-	-	CCDS3657.1	ENSP00000226574	P19838	D6RF93,D6RC45	UPI0000192724	-	-	-	-
1178	4	chr4:103533656	NFKB1	A	C	0.005556	0	1	89	0.01111	0.01105	1	4:103533656-103533656	A	missense_variant	MODERATE	NFKB1	ENSG00000109320	Transcript	ENST00000226574.4	protein_coding	22/24	-	ENST00000226574.4:c.2485C>A	ENSP00000226574.4:p.Pro829Thr	2952	2485	829	P/T	Cca/Aca	-	-	1	-	HGNC	7794	YES	-	-	-	CCDS3657.1	ENSP00000226574	P19838	D6RF93,D6RC45	UPI0000192724	tolerated(0.4)	benign(0.05)	hmmpanther:PTHR24169:SF9,hmmpanther:PTHR24169,Gene3D:1.10.533.10,Pfam_domain:PF00531,SMART_domains:SM00005,Superfamily_domains:SSF47986	-
1180	4	chr4:103537741	NFKB1	T	G	0.005556	0	1	89	0.01111	0.01105	1	4:103537741-103537741	T	missense_variant	MODERATE	NFKB1	ENSG00000109320	Transcript	ENST00000226574.4	protein_coding	24/24	-	ENST00000226574.4:c.2900G>T	ENSP00000226574.4:p.Gly967Val	3367	2900	967	G/V	gGc/gTc	-	-	1	-	HGNC	7794	YES	-	-	-	CCDS3657.1	ENSP00000226574	P19838	D6RF93,D6RC45	UPI0000192724	deleterious_low_confidence(0)	possibly_damaging(0.858)	-	-
2663	10	chr10:104156192	NFKB2	A	C	0.005556	0	1	89	0.01111	0.01105	1	10:104156192-104156192	A	intron_variant	MODIFIER	NFKB2	ENSG00000077150	Transcript	ENST00000369966.3	protein_coding	-	3/22	ENST00000369966.3:c.104-14C>A	-	-	-	-	-	-	-	-	1	-	HGNC	7795	YES	-	-	-	CCDS41564.1	ENSP00000358983	Q00653	M0R119,M0QZX1	UPI000016A5CD	-	-	-	-
3091	14	chr14:51221316	NIN	G	C	0.01111	1	0	89	0	0.02198	0.005587	14:51221316-51221316	G	missense_variant	MODERATE	NIN	ENSG00000100503	Transcript	ENST00000382041.3	protein_coding	20/30	-	ENST00000382041.3:c.4699G>C	ENSP00000371472.3:p.Ala1567Pro	4890	4699	1567	A/P	Gca/Cca	-	-	-1	-	HGNC	14906	YES	-	-	-	CCDS32079.1	ENSP00000371472	Q8N4C6	H7C162,E9PJH9	UPI0000DBEF14	deleterious(0.01)	benign(0.346)	Gene3D:1.20.5.490,Coiled-coils_(Ncoils):Coil,hmmpanther:PTHR18905,hmmpanther:PTHR18905:SF11	-
3097	14	chr14:51225320	NIN	C	T	0.005556	0	1	89	0.01111	0.01105	1	14:51225320-51225320	C	missense_variant	MODERATE	NIN	ENSG00000100503	Transcript	ENST00000382041.3	protein_coding	18/30	-	ENST00000382041.3:c.2428A>G	ENSP00000371472.3:p.Arg810Gly	2619	2428	810	R/G	Aga/Gga	-	-	-1	-	HGNC	14906	YES	-	-	-	CCDS32079.1	ENSP00000371472	Q8N4C6	H7C162,E9PJH9	UPI0000DBEF14	deleterious(0)	probably_damaging(0.996)	Coiled-coils_(Ncoils):Coil,hmmpanther:PTHR18905,hmmpanther:PTHR18905:SF11	-
3546	17	chr17:5487204	NLRP1	A	T	0.005556	0	1	89	0.01111	0.01105	1	17:5487204-5487204	A	missense_variant	MODERATE	NLRP1	ENSG00000091592	Transcript	ENST00000572272.1	protein_coding	1/17	-	ENST00000572272.1:c.74A>T	ENSP00000460475.1:p.Gln25Leu	74	74	25	Q/L	cAg/cTg	-	-	-1	-	HGNC	14374	YES	-	-	-	CCDS42246.1	ENSP00000460475	Q9C000	I3L2G5,I3L0S2	UPI0000038309	tolerated(0.22)	benign(0.014)	Gene3D:1.10.533.10,Pfam_domain:PF02758,PROSITE_profiles:PS50824,hmmpanther:PTHR24106,hmmpanther:PTHR24106:SF13,Superfamily_domains:SSF47986,Low_complexity_(Seg):seg	-
147	1	chr1:120477935	NOTCH2	A	G	0.005556	0	1	89	0.01111	0.01105	1	1:120477935-120477935	A	intron_variant	MODIFIER	NOTCH2	ENSG00000134250	Transcript	ENST00000256646.2	protein_coding	-	22/33	ENST00000256646.2:c.3655+160C>T	-	-	-	-	-	-	-	-	-1	-	HGNC	7882	YES	-	-	-	CCDS908.1	ENSP00000256646	Q04721	Q9UFD5,Q13560	UPI000013CF1D	-	-	-	-
159	1	chr1:120539655	NOTCH2	C	G	0.005556	0	1	89	0.01111	0.01105	1	1:120539655-120539655	C	missense_variant	MODERATE	NOTCH2	ENSG00000134250	Transcript	ENST00000256646.2	protein_coding	4/34	-	ENST00000256646.2:c.716C>G	ENSP00000256646.2:p.Thr239Ser	936	716	239	T/S	aCt/aGt	-	-	-1	-	HGNC	7882	YES	-	-	-	CCDS908.1	ENSP00000256646	Q04721	Q9UFD5,Q13560	UPI000013CF1D	tolerated(0.14)	benign(0.369)	Gene3D:2gy5A03,PIRSF_domain:PIRSF002279,PROSITE_profiles:PS50026,hmmpanther:PTHR24033,hmmpanther:PTHR24033:SF4,SMART_domains:SM00179,SMART_domains:SM00181,Superfamily_domains:SSF57196	-
1438	6	chr6:32164107	NOTCH4	A	G	0.005556	0	1	89	0.01111	0.01105	1	6:32164107-32164107	A	synonymous_variant	LOW	NOTCH4	ENSG00000204301	Transcript	ENST00000375023.3	protein_coding	29/30	-	ENST00000375023.3:c.5292C>T	ENSP00000364163.3:p.Asp1764%3D	5431	5292	1764	D	gaC/gaT	-	-	-1	-	HGNC	7884	YES	-	-	-	CCDS34420.1	ENSP00000364163	Q99466	-	UPI0000130571	-	-	PROSITE_profiles:PS50088,PROSITE_profiles:PS50297,hmmpanther:PTHR24033,Gene3D:1.25.40.20,Pfam_domain:PF12796,PIRSF_domain:PIRSF002279,Superfamily_domains:SSF48403,Prints_domain:PR01983	-
1442	6	chr6:32166734	NOTCH4	A	G	0.005556	0	1	89	0.01111	0.01105	1	6:32166734-32166734	A	missense_variant	MODERATE	NOTCH4	ENSG00000204301	Transcript	ENST00000375023.3	protein_coding	24/30	-	ENST00000375023.3:c.4504C>T	ENSP00000364163.3:p.Pro1502Ser	4643	4504	1502	P/S	Ccc/Tcc	-	-	-1	-	HGNC	7884	YES	-	-	-	CCDS34420.1	ENSP00000364163	Q99466	-	UPI0000130571	tolerated(0.07)	benign(0.035)	hmmpanther:PTHR24033,PIRSF_domain:PIRSF002279	-
1384	5	chr5:176637204	NSD1	C	T	0.01111	0	2	88	0.02222	0.02198	1	5:176637204-176637204	C	missense_variant	MODERATE	NSD1	ENSG00000165671	Transcript	ENST00000439151.2	protein_coding	5/23	-	ENST00000439151.2:c.1804T>C	ENSP00000395929.2:p.Cys602Arg	1849	1804	602	C/R	Tgt/Cgt	-	-	1	-	HGNC	14234	YES	-	-	-	CCDS4412.1	ENSP00000395929	Q96L73	Q9H6H8,Q9H6B5,Q96MN8,Q96DQ7,Q658U6,D6RE14,D6RBP3,D6RA90	UPI000006F9C6	tolerated_low_confidence(0.46)	benign(0)	hmmpanther:PTHR22884,hmmpanther:PTHR22884:SF312	-
328	1	chr1:156811985	NTRK1	C	G	0.005556	0	1	89	0.01111	0.01105	1	1:156811985-156811985	C	missense_variant	MODERATE	INSRR	ENSG00000027644	Transcript	ENST00000368195.3	protein_coding	19/22	-	ENST00000368195.3:c.3316C>G	ENSP00000357178.3:p.Leu1106Val	3713	3316	1106	L/V	Ctt/Gtt	-	-	-1	-	HGNC	6093	YES	-	-	-	CCDS1160.1	ENSP00000357178	P14616	I6U4P1	UPI000012D8BD	deleterious(0.03)	possibly_damaging(0.812)	PROSITE_profiles:PS50011,hmmpanther:PTHR24416,hmmpanther:PTHR24416:SF107,Pfam_domain:PF07714,Gene3D:1.10.510.10,SMART_domains:SM00219,PIRSF_domain:PIRSF000620,Superfamily_domains:SSF56112,Prints_domain:PR00109	-
329	1	chr1:156841496	NTRK1	A	G	0.005556	0	1	89	0.01111	0.01105	1	1:156841496-156841496	A	missense_variant	MODERATE	NTRK1	ENSG00000198400	Transcript	ENST00000524377.1	protein_coding	7/17	-	ENST00000524377.1:c.799G>A	ENSP00000431418.1:p.Ala267Thr	840	799	267	A/T	Gca/Aca	-	-	1	-	HGNC	8031	YES	-	-	-	CCDS1161.1	ENSP00000431418	P04629	-	UPI000013D5D3	deleterious(0)	possibly_damaging(0.862)	PROSITE_profiles:PS50835,hmmpanther:PTHR24416,hmmpanther:PTHR24416:SF133,Pfam_domain:PF13895,Gene3D:2.60.40.10,Superfamily_domains:SSF48726,Prints_domain:PR01939	-
3280	15	chr15:88669573	NTRK3	A	G	0.005556	0	1	89	0.01111	0.01105	1	15:88669573-88669573	A	missense_variant	MODERATE	NTRK3	ENSG00000140538	Transcript	ENST00000360948.2	protein_coding	12/19	-	ENST00000360948.2:c.1325C>T	ENSP00000354207.2:p.Ala442Val	1487	1325	442	A/V	gCc/gTc	-	-	-1	-	HGNC	8033	YES	-	-	-	CCDS32322.1	ENSP00000354207	Q16288	R4GNH5	UPI000006DC82	tolerated(0.18)	benign(0.316)	hmmpanther:PTHR24416:SF66,hmmpanther:PTHR24416,Low_complexity_(Seg):seg,Transmembrane_helices:TMhelix	-
2506	9	chr9:134090676	NUP214	G	A	0.01111	1	0	89	0	0.02198	0.005587	9:134090676-134090676	G	synonymous_variant	LOW	NUP214	ENSG00000126883	Transcript	ENST00000359428.5	protein_coding	31/36	-	ENST00000359428.5:c.5670A>G	ENSP00000352400.5:p.Gly1890%3D	5814	5670	1890	G	ggA/ggG	-	-	1	-	HGNC	8064	YES	-	-	-	CCDS6940.1	ENSP00000352400	P35658	H0YDI2,E9PS86	UPI00001BBB2F	-	-	Low_complexity_(Seg):seg,hmmpanther:PTHR23193,hmmpanther:PTHR23193:SF21	-
2714	11	chr11:3794852	NUP98	A	T	0.005556	0	1	89	0.01111	0.01105	1	11:3794852-3794852	A	intron_variant	MODIFIER	NUP98	ENSG00000110713	Transcript	ENST00000324932.7	protein_coding	-	6/32	ENST00000324932.7:c.603+10A>T	-	-	-	-	-	-	-	-	-1	-	HGNC	8068	YES	-	-	-	CCDS7746.1	ENSP00000316032	P52948	Q9HDC8	UPI000013CD36	-	-	-	-
4245	23	chrX:110463549	PAK3	T	G	0	0	0	35	0	0	1	X:110463549-110463549	T	intron_variant	MODIFIER	PAK3	ENSG00000077264	Transcript	ENST00000360648.4	protein_coding	-	15/15	ENST00000360648.4:c.1654-37G>T	-	-	-	-	-	-	-	-	1	-	HGNC	8592	YES	-	-	-	CCDS48151.1	ENSP00000353864	O75914	B1AKS5	UPI0000D61DBC	-	-	-	-
2430	9	chr9:37006542	PAX5	A	C	0.005556	0	1	89	0.01111	0.01105	1	9:37006542-37006542	A	splice_region_variant,intron_variant	LOW	PAX5	ENSG00000196092	Transcript	ENST00000358127.4	protein_coding	-	3/9	ENST00000358127.4:c.411-8G>T	-	-	-	-	-	-	-	-	-1	-	HGNC	8619	YES	-	-	-	CCDS6607.1	ENSP00000350844	Q02548	E7ERK2,C0KTE1	UPI000013136C	-	-	-	-
57	1	chr1:19018422	PAX7	T	C	0.005556	0	1	89	0.01111	0.01105	1	1:19018422-19018422	T	missense_variant	MODERATE	PAX7	ENSG00000009709	Transcript	ENST00000375375.3	protein_coding	5/8	-	ENST00000375375.3:c.761C>T	ENSP00000364524.3:p.Thr254Ile	1359	761	254	T/I	aCc/aTc	-	-	1	-	HGNC	8621	YES	-	-	-	CCDS186.1	ENSP00000364524	P23759	-	UPI000004A132	tolerated(0.34)	benign(0.41)	PROSITE_profiles:PS50071,hmmpanther:PTHR24329,hmmpanther:PTHR24329:SF248,PROSITE_patterns:PS00027,Gene3D:1.10.10.60,Pfam_domain:PF00046,SMART_domains:SM00389,Superfamily_domains:SSF46689	-
901	3	chr3:52610602	PBRM1	C	A	0.005556	0	1	89	0.01111	0.01105	1	3:52610602-52610602	C	missense_variant	MODERATE	PBRM1	ENSG00000163939	Transcript	ENST00000394830.3	protein_coding	23/30	-	ENST00000394830.3:c.3571T>G	ENSP00000378307.3:p.Phe1191Val	3671	3571	1191	F/V	Ttt/Gtt	-	-	-1	-	HGNC	30064	YES	-	-	-	CCDS43099.1	ENSP00000378307	Q86U86	C9JQF1,C9JPI5,C9JCJ2,C9J9L6,C9J409,C9J053	UPI000013E31E	deleterious(0)	probably_damaging(0.974)	Pfam_domain:PF01426,PROSITE_profiles:PS51038,hmmpanther:PTHR16062,SMART_domains:SM00439	-
902	3	chr3:52610619	PBRM1	G	A	0.005556	0	1	89	0.01111	0.01105	1	3:52610619-52610619	G	missense_variant	MODERATE	PBRM1	ENSG00000163939	Transcript	ENST00000394830.3	protein_coding	23/30	-	ENST00000394830.3:c.3554T>C	ENSP00000378307.3:p.Phe1185Ser	3654	3554	1185	F/S	tTc/tCc	-	-	-1	-	HGNC	30064	YES	-	-	-	CCDS43099.1	ENSP00000378307	Q86U86	C9JQF1,C9JPI5,C9JCJ2,C9J9L6,C9J409,C9J053	UPI000013E31E	deleterious(0)	probably_damaging(0.981)	Pfam_domain:PF01426,PROSITE_profiles:PS51038,hmmpanther:PTHR16062,SMART_domains:SM00439	-
161	1	chr1:144852315	PDE4DIP	T	C	0.04444	1	6	83	0.06667	0.08494	0.1499	1:144852315-144852315	T	3_prime_UTR_variant	MODIFIER	PDE4DIP	ENSG00000178104	Transcript	ENST00000369356.4	protein_coding	44/44	-	ENST00000369356.4:c.*39G>A	-	7419	-	-	-	-	-	-	-1	-	HGNC	15580	YES	-	-	-	CCDS55627.1	ENSP00000358363	Q5VU43	I1VE15	UPI0000458A81	-	-	-	-
181	1	chr1:144859929	PDE4DIP	T	C	0.02778	0	5	85	0.05556	0.05401	1	1:144859929-144859929	T	missense_variant	MODERATE	PDE4DIP	ENSG00000178104	Transcript	ENST00000369356.4	protein_coding	38/44	-	ENST00000369356.4:c.6155G>A	ENSP00000358363.4:p.Arg2052Gln	6446	6155	2052	R/Q	cGa/cAa	-	-	-1	-	HGNC	15580	YES	-	-	-	CCDS55627.1	ENSP00000358363	Q5VU43	I1VE15	UPI0000458A81	tolerated(0.06)	probably_damaging(0.933)	hmmpanther:PTHR13895,hmmpanther:PTHR13895:SF2	-
182	1	chr1:144863360	PDE4DIP	C	T	0.02222	0	4	86	0.04444	0.04346	1	1:144863360-144863360	C	missense_variant	MODERATE	PDE4DIP	ENSG00000178104	Transcript	ENST00000369356.4	protein_coding	37/44	-	ENST00000369356.4:c.6043A>G	ENSP00000358363.4:p.Ile2015Val	6334	6043	2015	I/V	Atc/Gtc	-	-	-1	-	HGNC	15580	YES	-	-	-	CCDS55627.1	ENSP00000358363	Q5VU43	I1VE15	UPI0000458A81	tolerated(1)	benign(0.007)	Coiled-coils_(Ncoils):Coil,hmmpanther:PTHR13895,hmmpanther:PTHR13895:SF2	-
183	1	chr1:144863366	PDE4DIP	A	G	0.005556	0	1	89	0.01111	0.01105	1	1:144863366-144863366	A	synonymous_variant	LOW	PDE4DIP	ENSG00000178104	Transcript	ENST00000369356.4	protein_coding	37/44	-	ENST00000369356.4:c.6037C>T	ENSP00000358363.4:p.Leu2013%3D	6328	6037	2013	L	Cta/Tta	-	-	-1	-	HGNC	15580	YES	-	-	-	CCDS55627.1	ENSP00000358363	Q5VU43	I1VE15	UPI0000458A81	-	-	Coiled-coils_(Ncoils):Coil,hmmpanther:PTHR13895,hmmpanther:PTHR13895:SF2,Low_complexity_(Seg):seg	-
184	1	chr1:144863384	PDE4DIP	A	C	0.005556	0	1	89	0.01111	0.01105	1	1:144863384-144863384	A	stop_gained	HIGH	PDE4DIP	ENSG00000178104	Transcript	ENST00000369356.4	protein_coding	37/44	-	ENST00000369356.4:c.6019G>T	ENSP00000358363.4:p.Glu2007Ter	6310	6019	2007	E/*	Gag/Tag	-	-	-1	-	HGNC	15580	YES	-	-	-	CCDS55627.1	ENSP00000358363	Q5VU43	I1VE15	UPI0000458A81	-	-	Coiled-coils_(Ncoils):Coil,hmmpanther:PTHR13895,hmmpanther:PTHR13895:SF2,Low_complexity_(Seg):seg	-
185	1	chr1:144863388	PDE4DIP	TT	GA	0.005556	0	1	89	0.01111	0.01105	1	1:144863388-144863389	TT	missense_variant	MODERATE	PDE4DIP	ENSG00000178104	Transcript	ENST00000369356.4	protein_coding	37/44	-	ENST00000369356.4:c.6014_6015delinsAA	ENSP00000358363.4:p.Leu2005Gln	6305-6306	6014-6015	2005	L/Q	cTC/cAA	-	-	-1	-	HGNC	15580	YES	-	-	-	CCDS55627.1	ENSP00000358363	Q5VU43	I1VE15	UPI0000458A81	deleterious(0)	probably_damaging(0.999)	Coiled-coils_(Ncoils):Coil,hmmpanther:PTHR13895,hmmpanther:PTHR13895:SF2,Low_complexity_(Seg):seg	-
192	1	chr1:144866660	PDE4DIP	T	G	0.005556	0	1	89	0.01111	0.01105	1	1:144866660-144866660	T	missense_variant	MODERATE	PDE4DIP	ENSG00000178104	Transcript	ENST00000369356.4	protein_coding	34/44	-	ENST00000369356.4:c.5582C>A	ENSP00000358363.4:p.Ser1861Tyr	5873	5582	1861	S/Y	tCc/tAc	-	-	-1	-	HGNC	15580	YES	-	-	-	CCDS55627.1	ENSP00000358363	Q5VU43	I1VE15	UPI0000458A81	deleterious(0)	probably_damaging(0.999)	Coiled-coils_(Ncoils):Coil,hmmpanther:PTHR13895,hmmpanther:PTHR13895:SF2	-
194	1	chr1:144866673	PDE4DIP	A	G	0.01111	0	2	88	0.02222	0.02198	1	1:144866673-144866673	A	missense_variant	MODERATE	PDE4DIP	ENSG00000178104	Transcript	ENST00000369356.4	protein_coding	34/44	-	ENST00000369356.4:c.5569C>T	ENSP00000358363.4:p.Arg1857Cys	5860	5569	1857	R/C	Cgc/Tgc	-	-	-1	-	HGNC	15580	YES	-	-	-	CCDS55627.1	ENSP00000358363	Q5VU43	I1VE15	UPI0000458A81	deleterious(0)	probably_damaging(0.999)	Coiled-coils_(Ncoils):Coil,hmmpanther:PTHR13895,hmmpanther:PTHR13895:SF2	-
208	1	chr1:144879054	PDE4DIP	C	T	0.02222	0	4	86	0.04444	0.04346	1	1:144879054-144879054	C	missense_variant	MODERATE	PDE4DIP	ENSG00000178104	Transcript	ENST00000369356.4	protein_coding	27/44	-	ENST00000369356.4:c.4396A>G	ENSP00000358363.4:p.Arg1466Gly	4687	4396	1466	R/G	Aga/Gga	-	-	-1	-	HGNC	15580	YES	-	-	-	CCDS55627.1	ENSP00000358363	Q5VU43	I1VE15	UPI0000458A81	deleterious(0)	possibly_damaging(0.548)	hmmpanther:PTHR13895,hmmpanther:PTHR13895:SF2	-
209	1	chr1:144879086	PDE4DIP	-	T	0.005556	0	1	89	0.01111	0.01105	1	1:144879085-144879086	-	frameshift_variant	HIGH	PDE4DIP	ENSG00000178104	Transcript	ENST00000369356.4	protein_coding	27/44	-	ENST00000369356.4:c.4364del	ENSP00000358363.4:p.Asn1455MetfsTer3	4655	4364	1455	N/X	aAt/at	-	-	-1	-	HGNC	15580	YES	-	-	-	CCDS55627.1	ENSP00000358363	Q5VU43	I1VE15	UPI0000458A81	-	-	hmmpanther:PTHR13895,hmmpanther:PTHR13895:SF2	-
216	1	chr1:144881463	PDE4DIP	T	C	0.02778	0	5	85	0.05556	0.05401	1	1:144881463-144881463	T	missense_variant	MODERATE	PDE4DIP	ENSG00000178104	Transcript	ENST00000369356.4	protein_coding	25/44	-	ENST00000369356.4:c.3733G>A	ENSP00000358363.4:p.Ala1245Thr	4024	3733	1245	A/T	Gct/Act	-	-	-1	-	HGNC	15580	YES	-	-	-	CCDS55627.1	ENSP00000358363	Q5VU43	I1VE15	UPI0000458A81	deleterious(0.04)	probably_damaging(0.974)	hmmpanther:PTHR13895,hmmpanther:PTHR13895:SF2	-
217	1	chr1:144881547	PDE4DIP	A	G	0.05	0	9	81	0.1	0.095	1	1:144881547-144881547	A	missense_variant	MODERATE	PDE4DIP	ENSG00000178104	Transcript	ENST00000369356.4	protein_coding	25/44	-	ENST00000369356.4:c.3649C>T	ENSP00000358363.4:p.Arg1217Cys	3940	3649	1217	R/C	Cgc/Tgc	-	-	-1	-	HGNC	15580	YES	-	-	-	CCDS55627.1	ENSP00000358363	Q5VU43	I1VE15	UPI0000458A81	tolerated(0.11)	probably_damaging(0.994)	Coiled-coils_(Ncoils):Coil,hmmpanther:PTHR13895,hmmpanther:PTHR13895:SF2	-
225	1	chr1:144886092	PDE4DIP	T	C	0.3667	0	66	24	0.7333	0.4644	2.399e-009	1:144886092-144886092	T	splice_region_variant,intron_variant	LOW	PDE4DIP	ENSG00000178104	Transcript	ENST00000369356.4	protein_coding	-	23/43	ENST00000369356.4:c.3137+5G>A	-	-	-	-	-	-	-	-	-1	-	HGNC	15580	YES	-	-	-	CCDS55627.1	ENSP00000358363	Q5VU43	I1VE15	UPI0000458A81	-	-	-	-
227	1	chr1:144886267	PDE4DIP	T	G	0.02222	0	4	86	0.04444	0.04346	1	1:144886267-144886267	T	synonymous_variant	LOW	PDE4DIP	ENSG00000178104	Transcript	ENST00000369356.4	protein_coding	23/44	-	ENST00000369356.4:c.2967C>A	ENSP00000358363.4:p.Ser989%3D	3258	2967	989	S	tcC/tcA	-	-	-1	-	HGNC	15580	YES	-	-	-	CCDS55627.1	ENSP00000358363	Q5VU43	I1VE15	UPI0000458A81	-	-	hmmpanther:PTHR13895,hmmpanther:PTHR13895:SF2	-
246	1	chr1:144923712	PDE4DIP	C	T	0.005556	0	1	89	0.01111	0.01105	1	1:144923712-144923712	C	missense_variant	MODERATE	PDE4DIP	ENSG00000178104	Transcript	ENST00000369356.4	protein_coding	6/44	-	ENST00000369356.4:c.746A>G	ENSP00000358363.4:p.Gln249Arg	1037	746	249	Q/R	cAg/cGg	-	-	-1	-	HGNC	15580	YES	-	-	-	CCDS55627.1	ENSP00000358363	Q5VU43	I1VE15	UPI0000458A81	deleterious(0)	benign(0.216)	Coiled-coils_(Ncoils):Coil,hmmpanther:PTHR13895,hmmpanther:PTHR13895:SF2	-
247	1	chr1:144930571	PDE4DIP	A	C	0.4222	0	76	14	0.8444	0.4879	8.431e-014	1:144930571-144930571	A	intron_variant	MODIFIER	PDE4DIP	ENSG00000178104	Transcript	ENST00000369356.4	protein_coding	-	5/43	ENST00000369356.4:c.637-6750G>T	-	-	-	-	-	-	-	-	-1	-	HGNC	15580	YES	-	-	-	CCDS55627.1	ENSP00000358363	Q5VU43	I1VE15	UPI0000458A81	-	-	-	-
250	1	chr1:144930977	PDE4DIP	C	A	0.01111	0	2	88	0.02222	0.02198	1	1:144930977-144930977	C	intron_variant	MODIFIER	PDE4DIP	ENSG00000178104	Transcript	ENST00000369356.4	protein_coding	-	5/43	ENST00000369356.4:c.637-7156T>G	-	-	-	-	-	-	-	-	-1	-	HGNC	15580	YES	-	-	-	CCDS55627.1	ENSP00000358363	Q5VU43	I1VE15	UPI0000458A81	-	-	-	-
255	1	chr1:144931423	PDE4DIP	C	T	0.005556	0	1	89	0.01111	0.01105	1	1:144931423-144931423	C	intron_variant	MODIFIER	PDE4DIP	ENSG00000178104	Transcript	ENST00000369356.4	protein_coding	-	5/43	ENST00000369356.4:c.637-7602A>G	-	-	-	-	-	-	-	-	-1	-	HGNC	15580	YES	-	-	-	CCDS55627.1	ENSP00000358363	Q5VU43	I1VE15	UPI0000458A81	-	-	-	-
259	1	chr1:144994617	PDE4DIP	T	C	0.01667	0	3	87	0.03333	0.03278	1	1:144994617-144994617	T	missense_variant	MODERATE	PDE4DIP	ENSG00000178104	Transcript	ENST00000369356.4	protein_coding	1/44	-	ENST00000369356.4:c.115G>A	ENSP00000358363.4:p.Ala39Thr	406	115	39	A/T	Gcc/Acc	-	-	-1	-	HGNC	15580	YES	-	-	-	CCDS55627.1	ENSP00000358363	Q5VU43	I1VE15	UPI0000458A81	tolerated(0.11)	benign(0.318)	Pfam_domain:PF07989,hmmpanther:PTHR13895,hmmpanther:PTHR13895:SF2	-
261	1	chr1:144994670	PDE4DIP	A	C	0.03333	0	6	84	0.06667	0.06444	1	1:144994670-144994670	A	missense_variant	MODERATE	PDE4DIP	ENSG00000178104	Transcript	ENST00000369356.4	protein_coding	1/44	-	ENST00000369356.4:c.62G>T	ENSP00000358363.4:p.Ser21Ile	353	62	21	S/I	aGc/aTc	-	-	-1	-	HGNC	15580	YES	-	-	-	CCDS55627.1	ENSP00000358363	Q5VU43	I1VE15	UPI0000458A81	deleterious(0)	probably_damaging(0.998)	Pfam_domain:PF07989,hmmpanther:PTHR13895,hmmpanther:PTHR13895:SF2	-
262	1	chr1:144994694	PDE4DIP	C	T	0.005556	0	1	89	0.01111	0.01105	1	1:144994694-144994694	C	missense_variant	MODERATE	PDE4DIP	ENSG00000178104	Transcript	ENST00000369356.4	protein_coding	1/44	-	ENST00000369356.4:c.38A>G	ENSP00000358363.4:p.Asn13Ser	329	38	13	N/S	aAt/aGt	-	-	-1	-	HGNC	15580	YES	-	-	-	CCDS55627.1	ENSP00000358363	Q5VU43	I1VE15	UPI0000458A81	deleterious(0)	probably_damaging(0.948)	Pfam_domain:PF07989,hmmpanther:PTHR13895,hmmpanther:PTHR13895:SF2	-
1095	4	chr4:55129892	PDGFRA	C	T	0.01111	1	0	89	0	0.02198	0.005587	4:55129892-55129892	C	synonymous_variant	LOW	PDGFRA	ENSG00000134853	Transcript	ENST00000257290.5	protein_coding	4/23	-	ENST00000257290.5:c.426T>C	ENSP00000257290.5:p.Asp142%3D	757	426	142	D	gaT/gaC	-	-	1	-	HGNC	8803	YES	-	-	-	CCDS3495.1	ENSP00000257290	P16234	D6RIG5,D6RG11,D6RDX0	UPI0000131793	-	-	Gene3D:2.60.40.10,SMART_domains:SM00409,PIRSF_domain:PIRSF500950,PIRSF_domain:PIRSF000615,Superfamily_domains:SSF48726	-
1096	4	chr4:55129894	PDGFRA	G	A	0.02222	2	0	88	0	0.04346	9.469e-005	4:55129894-55129894	G	missense_variant	MODERATE	PDGFRA	ENSG00000134853	Transcript	ENST00000257290.5	protein_coding	4/23	-	ENST00000257290.5:c.428A>G	ENSP00000257290.5:p.Asp143Gly	759	428	143	D/G	gAt/gGt	-	-	1	-	HGNC	8803	YES	-	-	-	CCDS3495.1	ENSP00000257290	P16234	D6RIG5,D6RG11,D6RDX0	UPI0000131793	tolerated(0.57)	benign(0)	Gene3D:2.60.40.10,SMART_domains:SM00409,PIRSF_domain:PIRSF500950,PIRSF_domain:PIRSF000615,Superfamily_domains:SSF48726	-
1360	5	chr5:149499530	PDGFRB	T	A	0.1111	0	20	70	0.2222	0.1975	0.5916	5:149499530-149499530	T	intron_variant	MODIFIER	PDGFRB	ENSG00000113721	Transcript	ENST00000261799.4	protein_coding	-	19/22	ENST00000261799.4:c.2698+45T>A	-	-	-	-	-	-	-	-	-1	-	HGNC	8804	YES	-	-	-	CCDS4303.1	ENSP00000261799	P09619	E5RJ14,E5RII0	UPI0000131791	-	-	-	-
1366	5	chr5:149514424	PDGFRB	A	C	0.005556	0	1	89	0.01111	0.01105	1	5:149514424-149514424	A	missense_variant	MODERATE	PDGFRB	ENSG00000113721	Transcript	ENST00000261799.4	protein_coding	4/23	-	ENST00000261799.4:c.520G>T	ENSP00000261799.4:p.Asp174Tyr	990	520	174	D/Y	Gat/Tat	-	-	-1	-	HGNC	8804	YES	-	-	-	CCDS4303.1	ENSP00000261799	P09619	E5RJ14,E5RII0	UPI0000131791	tolerated(0.14)	benign(0.087)	Gene3D:2.60.40.10,PIRSF_domain:PIRSF000615,PIRSF_domain:PIRSF500948	-
3571	17	chr17:8045566	PER1	GC	AA	0.005556	0	1	89	0.01111	0.01105	1	17:8045566-8045567	GC	intron_variant	MODIFIER	PER1	ENSG00000179094	Transcript	ENST00000317276.4	protein_coding	-	21/22	ENST00000317276.4:c.3449+20_3449+21delinsGC	-	-	-	-	-	-	-	-	-1	-	HGNC	8845	YES	-	-	-	CCDS11131.1	ENSP00000314420	O15534	J3QLQ5,A2I2P6	UPI000013FFF5	-	-	-	-
418	1	chr1:204438894	PIK3C2B	G	A	0.005556	0	1	89	0.01111	0.01105	1	1:204438894-204438894	G	missense_variant	MODERATE	PIK3C2B	ENSG00000133056	Transcript	ENST00000367187.3	protein_coding	3/34	-	ENST00000367187.3:c.37T>C	ENSP00000356155.3:p.Ser13Pro	594	37	13	S/P	Tcc/Ccc	-	-	-1	-	HGNC	8972	YES	-	-	-	CCDS1446.1	ENSP00000356155	O00750	Q5SW98,Q5SW97,Q4LE65,A2RUF7	UPI00002056D1	tolerated_low_confidence(0.19)	possibly_damaging(0.648)	hmmpanther:PTHR10048,hmmpanther:PTHR10048:SF30	-
1012	3	chr3:178916986	PIK3CA	A	C	0.005556	0	1	89	0.01111	0.01105	1	3:178916986-178916986	A	intron_variant	MODIFIER	PIK3CA	ENSG00000121879	Transcript	ENST00000263967.3	protein_coding	-	2/20	ENST00000263967.3:c.352+21C>A	-	-	-	-	-	-	-	-	1	-	HGNC	8975	YES	-	-	-	CCDS43171.1	ENSP00000263967	P42336	Q4LE51,C9JAM9,C9J951	UPI000013D494	-	-	-	-
1014	3	chr3:178922273	PIK3CA	AA	CC	0.005556	0	1	89	0.01111	0.01105	1	3:178922273-178922274	AA	intron_variant	MODIFIER	PIK3CA	ENSG00000121879	Transcript	ENST00000263967.3	protein_coding	-	5/20	ENST00000263967.3:c.1060-18_1060-17delinsAA	-	-	-	-	-	-	-	-	1	-	HGNC	8975	YES	-	-	-	CCDS43171.1	ENSP00000263967	P42336	Q4LE51,C9JAM9,C9J951	UPI000013D494	-	-	-	-
975	3	chr3:138461524	PIK3CB	G	A	0.005556	0	1	89	0.01111	0.01105	1	3:138461524-138461524	G	missense_variant	MODERATE	PIK3CB	ENSG00000051382	Transcript	ENST00000477593.1	protein_coding	4/23	-	ENST00000477593.1:c.497T>C	ENSP00000418143.1:p.Leu166Ser	571	497	166	L/S	tTg/tCg	-	-	-1	-	HGNC	8976	YES	-	-	-	CCDS3104.1	ENSP00000418143	P42338	Q9BTS4,Q6PJ60,C9JYX0,C9JNF6,C9J345	UPI0000046842	tolerated(0.21)	benign(0.266)	Gene3D:3.10.20.90,hmmpanther:PTHR10048,hmmpanther:PTHR10048:SF33,Superfamily_domains:SSF54236	-
2019	7	chr7:106545513	PIK3CG	G	A	0.005556	0	1	89	0.01111	0.01105	1	7:106545513-106545513	G	intron_variant	MODIFIER	PIK3CG	ENSG00000105851	Transcript	ENST00000359195.3	protein_coding	-	10/10	ENST00000359195.3:c.3031-41A>G	-	-	-	-	-	-	-	-	1	-	HGNC	8978	YES	-	-	-	CCDS5739.1	ENSP00000352121	P48736	Q24M88,E9PDN7	UPI00000746B8	-	-	-	-
1281	5	chr5:67522726	PIK3R1	T	G	0.005556	0	1	89	0.01111	0.01105	1	5:67522726-67522726	T	stop_gained	HIGH	PIK3R1	ENSG00000145675	Transcript	ENST00000521381.1	protein_coding	2/16	-	ENST00000521381.1:c.223G>T	ENSP00000428056.1:p.Glu75Ter	839	223	75	E/*	Gaa/Taa	-	-	1	-	HGNC	8979	YES	-	-	-	CCDS3993.1	ENSP00000428056	P27986	J7GXU7,J7GU64,E5RJY0,E5RHI0,E5RGI8,B3KWZ7	UPI000013D9FF	-	-	Gene3D:2.30.30.40,Pfam_domain:PF07653,PROSITE_profiles:PS50002,hmmpanther:PTHR10155,hmmpanther:PTHR10155:SF3,SMART_domains:SM00326,Superfamily_domains:SSF50044	-
1286	5	chr5:67590496	PIK3R1	T	G	0.005556	0	1	89	0.01111	0.01105	1	5:67590496-67590496	T	stop_gained	HIGH	PIK3R1	ENSG00000145675	Transcript	ENST00000521381.1	protein_coding	12/16	-	ENST00000521381.1:c.1558G>T	ENSP00000428056.1:p.Glu520Ter	2174	1558	520	E/*	Gaa/Taa	-	-	1	-	HGNC	8979	YES	-	-	-	CCDS3993.1	ENSP00000428056	P27986	J7GXU7,J7GU64,E5RJY0,E5RHI0,E5RGI8,B3KWZ7	UPI000013D9FF	-	-	Coiled-coils_(Ncoils):Coil,Prints_domain:PR00678,hmmpanther:PTHR10155,hmmpanther:PTHR10155:SF3	-
1487	6	chr6:51524653	PKHD1	T	A	0.005556	0	1	89	0.01111	0.01105	1	6:51524653-51524653	T	missense_variant	MODERATE	PKHD1	ENSG00000170927	Transcript	ENST00000371117.3	protein_coding	61/67	-	ENST00000371117.3:c.10271T>A	ENSP00000360158.3:p.Ile3424Asn	10547	10271	3424	I/N	aTt/aAt	-	-	-1	-	HGNC	9016	YES	-	-	-	CCDS4935.1	ENSP00000360158	P08F94	-	UPI000013C4C0	tolerated(0.59)	benign(0)	hmmpanther:PTHR11915,hmmpanther:PTHR11915:SF230	-
1490	6	chr6:51613058	PKHD1	T	G	0.005556	0	1	89	0.01111	0.01105	1	6:51613058-51613058	T	missense_variant	MODERATE	PKHD1	ENSG00000170927	Transcript	ENST00000371117.3	protein_coding	58/67	-	ENST00000371117.3:c.9356C>A	ENSP00000360158.3:p.Ser3119Tyr	9632	9356	3119	S/Y	tCt/tAt	-	-	-1	-	HGNC	9016	YES	-	-	-	CCDS4935.1	ENSP00000360158	P08F94	-	UPI000013C4C0	deleterious(0.03)	probably_damaging(0.949)	Gene3D:2.160.20.10,Pfam_domain:PF13229,hmmpanther:PTHR11915,hmmpanther:PTHR11915:SF230,Superfamily_domains:SSF51126	-
1508	6	chr6:51889459	PKHD1	A	T	0.005556	0	1	89	0.01111	0.01105	1	6:51889459-51889459	A	stop_gained	HIGH	PKHD1	ENSG00000170927	Transcript	ENST00000371117.3	protein_coding	32/67	-	ENST00000371117.3:c.5149A>T	ENSP00000360158.3:p.Arg1717Ter	5425	5149	1717	R/*	Aga/Tga	-	-	-1	-	HGNC	9016	YES	-	-	-	CCDS4935.1	ENSP00000360158	P08F94	-	UPI000013C4C0	-	-	hmmpanther:PTHR11915,hmmpanther:PTHR11915:SF230	-
1513	6	chr6:51890498	PKHD1	A	C	0.005556	0	1	89	0.01111	0.01105	1	6:51890498-51890498	A	missense_variant	MODERATE	PKHD1	ENSG00000170927	Transcript	ENST00000371117.3	protein_coding	32/67	-	ENST00000371117.3:c.4110G>T	ENSP00000360158.3:p.Gln1370His	4386	4110	1370	Q/H	caG/caT	-	-	-1	-	HGNC	9016	YES	-	-	-	CCDS4935.1	ENSP00000360158	P08F94	-	UPI000013C4C0	tolerated(0.3)	benign(0)	-	-
1527	6	chr6:51921815	PKHD1	GCCTT	-	0.02222	2	0	88	0	0.04346	9.469e-005	6:51921814-51921814	GCCTT	intron_variant	MODIFIER	PKHD1	ENSG00000170927	Transcript	ENST00000371117.3	protein_coding	-	16/66	ENST00000371117.3:c.1513-38_1513-37insAAGGC	-	-	-	-	-	-	-	-	-1	-	HGNC	9016	YES	-	-	-	CCDS4935.1	ENSP00000360158	P08F94	-	UPI000013C4C0	-	-	-	-
1528	6	chr6:51923126	PKHD1	T	C	0.005556	0	1	89	0.01111	0.01105	1	6:51923126-51923126	T	missense_variant	MODERATE	PKHD1	ENSG00000170927	Transcript	ENST00000371117.3	protein_coding	16/67	-	ENST00000371117.3:c.1507G>A	ENSP00000360158.3:p.Val503Ile	1783	1507	503	V/I	Gta/Ata	-	-	-1	-	HGNC	9016	YES	-	-	-	CCDS4935.1	ENSP00000360158	P08F94	-	UPI000013C4C0	tolerated(1)	benign(0)	-	-
677	2	chr2:190719333	PMS1	C	A	0.005556	0	1	89	0.01111	0.01105	1	2:190719333-190719333	C	synonymous_variant	LOW	PMS1	ENSG00000064933	Transcript	ENST00000441310.2	protein_coding	9/13	-	ENST00000441310.2:c.1335A>C	ENSP00000406490.2:p.Ser445%3D	1568	1335	445	S	tcA/tcC	-	-	1	-	HGNC	9121	YES	-	-	-	CCDS2302.1	ENSP00000406490	P54277	Q5FBZ2,C9JKP0,C9JF76,C9J4L1,B7ZAA0	UPI00000405F5	-	-	hmmpanther:PTHR10073,hmmpanther:PTHR10073:SF38	-
678	2	chr2:190719788	PMS1	A	G	0.005556	0	1	89	0.01111	0.01105	1	2:190719788-190719788	A	missense_variant	MODERATE	PMS1	ENSG00000064933	Transcript	ENST00000441310.2	protein_coding	9/13	-	ENST00000441310.2:c.1790G>A	ENSP00000406490.2:p.Ser597Asn	2023	1790	597	S/N	aGt/aAt	-	-	1	-	HGNC	9121	YES	-	-	-	CCDS2302.1	ENSP00000406490	P54277	Q5FBZ2,C9JKP0,C9JF76,C9J4L1,B7ZAA0	UPI00000405F5	tolerated(0.16)	benign(0.182)	Gene3D:1.10.30.10,Pfam_domain:PF00505,PROSITE_profiles:PS50118,hmmpanther:PTHR10073,hmmpanther:PTHR10073:SF38,SMART_domains:SM00398,Superfamily_domains:SSF47095	-
1866	7	chr7:6027040	PMS2	C	A	0.005556	0	1	89	0.01111	0.01105	1	7:6027040-6027040	C	synonymous_variant	LOW	PMS2	ENSG00000122512	Transcript	ENST00000265849.7	protein_coding	11/15	-	ENST00000265849.7:c.1356T>G	ENSP00000265849.7:p.Gly452%3D	1462	1356	452	G	ggT/ggG	-	-	-1	-	HGNC	9122	YES	-	-	-	CCDS5343.1	ENSP00000265849	P54278	-	UPI000013D696	-	-	hmmpanther:PTHR10073,hmmpanther:PTHR10073:SF9	-
1867	7	chr7:6029511	PMS2	T	A	0.01111	0	2	88	0.02222	0.02198	1	7:6029511-6029511	T	stop_gained	HIGH	PMS2	ENSG00000122512	Transcript	ENST00000265849.7	protein_coding	10/15	-	ENST00000265849.7:c.1064T>A	ENSP00000265849.7:p.Leu355Ter	1170	1064	355	L/*	tTa/tAa	-	-	-1	-	HGNC	9122	YES	-	-	-	CCDS5343.1	ENSP00000265849	P54278	-	UPI000013D696	-	-	Superfamily_domains:SSF54211,Gene3D:3.30.230.10,Pfam_domain:PF01119,hmmpanther:PTHR10073,hmmpanther:PTHR10073:SF9,Low_complexity_(Seg):seg	-
1868	7	chr7:6035156	PMS2	G	T	0.005556	0	1	89	0.01111	0.01105	1	7:6035156-6035156	G	intron_variant	MODIFIER	PMS2	ENSG00000122512	Transcript	ENST00000265849.7	protein_coding	-	8/14	ENST00000265849.7:c.903+9A>C	-	-	-	-	-	-	-	-	-1	-	HGNC	9122	YES	-	-	-	CCDS5343.1	ENSP00000265849	P54278	-	UPI000013D696	-	-	-	-
2033	7	chr7:124475481	POT1	G	T	0.005556	0	1	89	0.01111	0.01105	1	7:124475481-124475481	G	intron_variant	MODIFIER	POT1	ENSG00000128513	Transcript	ENST00000357628.3	protein_coding	-	14/18	ENST00000357628.3:c.1370-13A>C	-	-	-	-	-	-	-	-	-1	-	HGNC	17284	YES	-	-	-	CCDS5793.1	ENSP00000350249	Q9NUX5	C9JPG9,A8MTK3	UPI0000073E3F	-	-	-	-
3704	17	chr17:66511530	PRKAR1A	G	C	0.01111	1	0	89	0	0.02198	0.005587	17:66511530-66511530	G	splice_region_variant,intron_variant	LOW	PRKAR1A	ENSG00000108946	Transcript	ENST00000589228.1	protein_coding	-	1/10	ENST00000589228.1:c.-6-5C>G	-	-	-	-	-	-	-	-	1	-	HGNC	9388	YES	-	-	-	CCDS11678.1	ENSP00000464977	P10644	Q96P62,K7EQK3,K7EPR5,K7EPB2,K7ENR3,K7EMU2,K7EK41,K7EJ40,K7EIE5,K7EID3,B2R5T5	UPI0000001C57	-	-	-	-
2190	8	chr8:48686929	PRKDC	C	T	0.005556	0	1	89	0.01111	0.01105	1	8:48686929-48686929	C	synonymous_variant	LOW	PRKDC	ENSG00000253729	Transcript	ENST00000314191.2	protein_coding	87/87	-	ENST00000314191.2:c.12189A>G	ENSP00000313420.2:p.Leu4063%3D	12246	12189	4063	L	ctA/ctG	-	-	-1	-	HGNC	9413	YES	-	-	-	-	ENSP00000313420	P78527	F5GX40	UPI000045790C	-	-	PROSITE_profiles:PS50290,hmmpanther:PTHR11139,hmmpanther:PTHR11139:SF54,SMART_domains:SM00146	-
2199	8	chr8:48736499	PRKDC	G	C	0.005556	0	1	89	0.01111	0.01105	1	8:48736499-48736499	G	missense_variant	MODERATE	PRKDC	ENSG00000253729	Transcript	ENST00000314191.2	protein_coding	65/87	-	ENST00000314191.2:c.8839G>C	ENSP00000313420.2:p.Gly2947Arg	8896	8839	2947	G/R	Gga/Cga	-	-	-1	-	HGNC	9413	YES	-	-	-	-	ENSP00000313420	P78527	F5GX40	UPI000045790C	deleterious(0)	possibly_damaging(0.759)	PROSITE_profiles:PS51189,hmmpanther:PTHR11139,hmmpanther:PTHR11139:SF54	-
2205	8	chr8:48776046	PRKDC	G	A	0.005556	0	1	89	0.01111	0.01105	1	8:48776046-48776046	G	synonymous_variant	LOW	PRKDC	ENSG00000253729	Transcript	ENST00000314191.2	protein_coding	43/87	-	ENST00000314191.2:c.5661T>C	ENSP00000313420.2:p.Asp1887%3D	5718	5661	1887	D	gaT/gaC	-	-	-1	-	HGNC	9413	YES	-	-	-	-	ENSP00000313420	P78527	F5GX40	UPI000045790C	-	-	Pfam_domain:PF08163,hmmpanther:PTHR11139,hmmpanther:PTHR11139:SF54	-
2212	8	chr8:48825021	PRKDC	C	G	0.005556	0	1	89	0.01111	0.01105	1	8:48825021-48825021	C	synonymous_variant	LOW	PRKDC	ENSG00000253729	Transcript	ENST00000314191.2	protein_coding	25/87	-	ENST00000314191.2:c.2883C>G	ENSP00000313420.2:p.Leu961%3D	2940	2883	961	L	ctC/ctG	-	-	-1	-	HGNC	9413	YES	-	-	-	-	ENSP00000313420	P78527	F5GX40	UPI000045790C	-	-	Gene3D:1.25.10.10,hmmpanther:PTHR11139,hmmpanther:PTHR11139:SF54,Superfamily_domains:SSF48371	-
2213	8	chr8:48828031	PRKDC	C	A	0.005556	0	1	89	0.01111	0.01105	1	8:48828031-48828031	C	intron_variant	MODIFIER	PRKDC	ENSG00000253729	Transcript	ENST00000314191.2	protein_coding	-	22/86	ENST00000314191.2:c.2527-53T>G	-	-	-	-	-	-	-	-	-1	-	HGNC	9413	YES	-	-	-	-	ENSP00000313420	P78527	F5GX40	UPI000045790C	-	-	-	-
2453	9	chr9:98212211	PTCH1	T	G	0.005556	0	1	89	0.01111	0.01105	1	9:98212211-98212211	T	missense_variant	MODERATE	PTCH1	ENSG00000185920	Transcript	ENST00000331920.6	protein_coding	21/24	-	ENST00000331920.6:c.3461C>A	ENSP00000332353.6:p.Ala1154Asp	3761	3461	1154	A/D	gCt/gAt	-	-	-1	-	HGNC	9585	YES	-	-	-	CCDS6714.1	ENSP00000332353	Q13635	Q6TKQ0,F8VXL8,F8VQS6	UPI00001AFF9C	tolerated(0.13)	probably_damaging(0.953)	Superfamily_domains:SSF82866,Pfam_domain:PF02460,TIGRFAM_domain:TIGR00918,Gene3D:2j8sB01,hmmpanther:PTHR10796:SF61,hmmpanther:PTHR10796,Transmembrane_helices:TMhelix	-
2467	9	chr9:98241253	PTCH1	C	T	0.005556	0	1	89	0.01111	0.01105	1	9:98241253-98241253	C	intron_variant	MODIFIER	PTCH1	ENSG00000185920	Transcript	ENST00000331920.6	protein_coding	-	8/23	ENST00000331920.6:c.1215+29A>G	-	-	-	-	-	-	-	-	-1	-	HGNC	9585	YES	-	-	-	CCDS6714.1	ENSP00000332353	Q13635	Q6TKQ0,F8VXL8,F8VQS6	UPI00001AFF9C	-	-	-	-
388	1	chr1:186646996	PTGS2	A	C	0.005556	0	1	89	0.01111	0.01105	1	1:186646996-186646996	A	intron_variant	MODIFIER	PTGS2	ENSG00000073756	Transcript	ENST00000367468.5	protein_coding	-	4/9	ENST00000367468.5:c.458-34G>T	-	-	-	-	-	-	-	-	-1	-	HGNC	9605	YES	-	-	-	CCDS1371.1	ENSP00000356438	P35354	D9MWI3	UPI000000D926	-	-	-	-
389	1	chr1:186647541	PTGS2	C	A	0.005556	0	1	89	0.01111	0.01105	1	1:186647541-186647541	C	splice_region_variant,intron_variant	LOW	PTGS2	ENSG00000073756	Transcript	ENST00000367468.5	protein_coding	-	3/9	ENST00000367468.5:c.314-5T>G	-	-	-	-	-	-	-	-	-1	-	HGNC	9605	YES	-	-	-	CCDS1371.1	ENSP00000356438	P35354	D9MWI3	UPI000000D926	-	-	-	-
2971	12	chr12:112910806	PTPN11	A	-	0.005556	0	1	89	0.01111	0.01105	1	12:112910805-112910805	A	frameshift_variant	HIGH	PTPN11	ENSG00000179295	Transcript	ENST00000351677.2	protein_coding	7/16	-	ENST00000351677.2:c.818dup	ENSP00000340944.2:p.Asn273LysfsTer6	1012-1013	814-815	272	E/EX	gaa/gAaa	-	-	1	-	HGNC	9644	YES	-	-	-	CCDS9163.1	ENSP00000340944	Q06124	B3GUD4,B3GUD3	UPI000013296E	-	-	Gene3D:3.90.190.10,PIRSF_domain:PIRSF000929,PROSITE_profiles:PS50055,hmmpanther:PTHR19134,hmmpanther:PTHR19134:SF150,SMART_domains:SM00194,Superfamily_domains:SSF52799	4
2382	9	chr9:8460647	PTPRD	-	A	0.01111	1	0	89	0	0.02198	0.005587	9:8460646-8460647	-	intron_variant	MODIFIER	PTPRD	ENSG00000153707	Transcript	ENST00000381196.4	protein_coding	-	29/42	ENST00000381196.4:c.3715-76del	-	-	-	-	-	-	-	-	-1	-	HGNC	9668	YES	-	-	-	CCDS43786.1	ENSP00000370593	P23468	C9J6E4,B4DK48	UPI0000132990	-	-	-	-
2390	9	chr9:8485904	PTPRD	T	A	0.005556	0	1	89	0.01111	0.01105	1	9:8485904-8485904	T	synonymous_variant	LOW	PTPRD	ENSG00000153707	Transcript	ENST00000381196.4	protein_coding	25/43	-	ENST00000381196.4:c.2913T>A	ENSP00000370593.3:p.Leu971%3D	3457	2913	971	L	ctT/ctA	-	-	-1	-	HGNC	9668	YES	-	-	-	CCDS43786.1	ENSP00000370593	P23468	C9J6E4,B4DK48	UPI0000132990	-	-	Superfamily_domains:SSF49265,SMART_domains:SM00060,Pfam_domain:PF00041,Gene3D:2.60.40.10,hmmpanther:PTHR19134,hmmpanther:PTHR19134:SF204,PROSITE_profiles:PS50853	-
2391	9	chr9:8485984	PTPRD	T	C	0.005556	0	1	89	0.01111	0.01105	1	9:8485984-8485984	T	missense_variant	MODERATE	PTPRD	ENSG00000153707	Transcript	ENST00000381196.4	protein_coding	25/43	-	ENST00000381196.4:c.2833G>A	ENSP00000370593.3:p.Ala945Thr	3377	2833	945	A/T	Gca/Aca	-	-	-1	-	HGNC	9668	YES	-	-	-	CCDS43786.1	ENSP00000370593	P23468	C9J6E4,B4DK48	UPI0000132990	tolerated(0.12)	benign(0.024)	Superfamily_domains:SSF49265,SMART_domains:SM00060,Pfam_domain:PF00041,Gene3D:2.60.40.10,hmmpanther:PTHR19134,hmmpanther:PTHR19134:SF204,PROSITE_profiles:PS50853	-
4030	20	chr20:40743814	PTPRT	G	T	0.01111	1	0	89	0	0.02198	0.005587	20:40743814-40743814	G	intron_variant	MODIFIER	PTPRT	ENSG00000196090	Transcript	ENST00000373187.1	protein_coding	-	22/30	ENST00000373187.1:c.3099+25A>C	-	-	-	-	-	-	-	-	-1	-	HGNC	9682	YES	-	-	-	CCDS42874.1	ENSP00000362283	O14522	-	UPI0000246C03	-	-	-	-
1330	5	chr5:131924445	RAD50	A	C	0.005556	0	1	89	0.01111	0.01105	1	5:131924445-131924445	A	missense_variant	MODERATE	RAD50	ENSG00000113522	Transcript	ENST00000265335.6	protein_coding	8/25	-	ENST00000265335.6:c.1118C>A	ENSP00000265335.6:p.Ser373Tyr	1505	1118	373	S/Y	tCt/tAt	-	-	1	-	HGNC	9816	YES	-	-	-	CCDS34233.1	ENSP00000265335	Q92878	C9JNH8,A8K3I2	UPI000006E9ED	deleterious(0.01)	possibly_damaging(0.526)	hmmpanther:PTHR18867:SF12,hmmpanther:PTHR18867,TIGRFAM_domain:TIGR00606	-
804	3	chr3:12626400	RAF1	T	C	0.005556	0	1	89	0.01111	0.01105	1	3:12626400-12626400	T	synonymous_variant	LOW	RAF1	ENSG00000132155	Transcript	ENST00000251849.4	protein_coding	16/17	-	ENST00000251849.4:c.1749G>A	ENSP00000251849.4:p.Arg583%3D	2189	1749	583	R	agG/agA	-	-	-1	-	HGNC	9829	YES	-	-	-	CCDS2612.1	ENSP00000251849	P04049	L7RRS6	UPI0000049CFC	-	-	Superfamily_domains:SSF56112,SMART_domains:SM00220,Pfam_domain:PF07714,Gene3D:1.10.510.10,hmmpanther:PTHR23257,hmmpanther:PTHR23257:SF42,PROSITE_profiles:PS50011	-
805	3	chr3:12626737	RAF1	A	G	0.005556	0	1	89	0.01111	0.01105	1	3:12626737-12626737	A	stop_gained	HIGH	RAF1	ENSG00000132155	Transcript	ENST00000251849.4	protein_coding	15/17	-	ENST00000251849.4:c.1552C>T	ENSP00000251849.4:p.Arg518Ter	1992	1552	518	R/*	Cga/Tga	-	-	-1	-	HGNC	9829	YES	-	-	-	CCDS2612.1	ENSP00000251849	P04049	L7RRS6	UPI0000049CFC	-	-	Superfamily_domains:SSF56112,SMART_domains:SM00220,Pfam_domain:PF07714,Gene3D:1.10.510.10,hmmpanther:PTHR23257,hmmpanther:PTHR23257:SF42,PROSITE_profiles:PS50011	-
808	3	chr3:12641349	RAF1	GG	AA	0.005556	0	1	89	0.01111	0.01105	1	3:12641349-12641350	GG	intron_variant	MODIFIER	RAF1	ENSG00000132155	Transcript	ENST00000251849.4	protein_coding	-	9/16	ENST00000251849.4:c.991-43_991-42delinsCC	-	-	-	-	-	-	-	-	-1	-	HGNC	9829	YES	-	-	-	CCDS2612.1	ENSP00000251849	P04049	L7RRS6	UPI0000049CFC	-	-	-	-
2519	9	chr9:135981338	RALGDS	T	C	0.005556	0	1	89	0.01111	0.01105	1	9:135981338-135981338	T	missense_variant	MODERATE	RALGDS	ENSG00000160271	Transcript	ENST00000372050.3	protein_coding	9/18	-	ENST00000372050.3:c.1583G>A	ENSP00000361120.3:p.Ser528Asn	1605	1583	528	S/N	aGc/aAc	-	-	-1	-	HGNC	9842	YES	-	-	-	CCDS6959.1	ENSP00000361120	Q12967	Q9HAY0,Q9HAX9,Q9HAX8,Q8WU11,Q8N4Y1	UPI000012B8BC	deleterious(0)	probably_damaging(0.986)	Superfamily_domains:0041591,Gene3D:2ii0A02,Pfam_domain:PF00617,PROSITE_profiles:PS50009,hmmpanther:PTHR23113,hmmpanther:PTHR23113:SF35,SMART_domains:SM00147	-
3638	17	chr17:38504723	RARA	C	T	0.005556	0	1	89	0.01111	0.01105	1	17:38504723-38504723	C	splice_region_variant,intron_variant	LOW	RARA	ENSG00000131759	Transcript	ENST00000254066.5	protein_coding	-	3/8	ENST00000254066.5:c.327+7T>C	-	-	-	-	-	-	-	-	1	-	HGNC	9864	YES	-	-	-	CCDS11366.1	ENSP00000254066	P10276	Q6I9R7,J3QRM2,J3KSJ4	UPI0000134A0E	-	-	-	-
2342	8	chr8:145737307	RECQL4	A	G	0.005556	0	1	89	0.01111	0.01105	1	8:145737307-145737307	A	downstream_gene_variant	MODIFIER	GPT	ENSG00000167701	Transcript	ENST00000394955.2	protein_coding	-	-	-	-	-	-	-	-	-	-	4753	1	-	HGNC	4552	YES	-	-	-	CCDS6430.1	ENSP00000378408	P24298	-	UPI0000001054	-	-	-	-
563	2	chr2:61147771	REL	-	A	0.01111	0	2	88	0.02222	0.02198	1	2:61147770-61147771	-	frameshift_variant	HIGH	REL	ENSG00000162924	Transcript	ENST00000295025.8	protein_coding	10/11	-	ENST00000295025.8:c.1086del	ENSP00000295025.7:p.Glu363AsnfsTer11	1401	1081	361	K/X	Aaa/aa	-	-	1	-	HGNC	9954	YES	-	-	-	CCDS1864.1	ENSP00000295025	Q04864	-	UPI000013367B	-	-	hmmpanther:PTHR24169,hmmpanther:PTHR24169:SF4	5
564	2	chr2:61147775	REL	G	A	0.01111	0	2	88	0.02222	0.02198	1	2:61147775-61147775	G	missense_variant,splice_region_variant	MODERATE	REL	ENSG00000162924	Transcript	ENST00000295025.8	protein_coding	10/11	-	ENST00000295025.8:c.1085A>G	ENSP00000295025.7:p.Lys362Arg	1405	1085	362	K/R	aAa/aGa	-	-	1	-	HGNC	9954	YES	-	-	-	CCDS1864.1	ENSP00000295025	Q04864	-	UPI000013367B	deleterious(0)	probably_damaging(0.985)	hmmpanther:PTHR24169,hmmpanther:PTHR24169:SF4	-
362	1	chr1:185056670	RNF2	G	T	0.01111	0	2	88	0.02222	0.02198	1	1:185056670-185056670	G	intron_variant	MODIFIER	RNF2	ENSG00000121481	Transcript	ENST00000367510.3	protein_coding	-	1/6	ENST00000367510.3:c.-2-14T>G	-	-	-	-	-	-	-	-	1	-	HGNC	10061	YES	-	-	-	CCDS1365.1	ENSP00000356480	Q99496	-	UPI000007131D	-	-	-	-
363	1	chr1:185067185	RNF2	-	T	0.005556	0	1	89	0.01111	0.01105	1	1:185067184-185067185	-	intron_variant	MODIFIER	RNF2	ENSG00000121481	Transcript	ENST00000367510.3	protein_coding	-	4/6	ENST00000367510.3:c.465-14del	-	-	-	-	-	-	-	-	1	-	HGNC	10061	YES	-	-	-	CCDS1365.1	ENSP00000356480	Q99496	-	UPI000007131D	-	-	-	5
3728	17	chr17:78262057	RNF213	T	A	0.005556	0	1	89	0.01111	0.01105	1	17:78262057-78262057	T	missense_variant	MODERATE	RNF213	ENSG00000173821	Transcript	ENST00000582970.1	protein_coding	4/68	-	ENST00000582970.1:c.705A>T	ENSP00000464087.1:p.Glu235Asp	848	705	235	E/D	gaA/gaT	-	-	1	-	HGNC	14539	YES	-	-	-	CCDS58606.1	ENSP00000464087	Q63HN8	H3BLU6	UPI0001D3BDB1	tolerated(0.35)	benign(0)	hmmpanther:PTHR22605,hmmpanther:PTHR22605:SF5	-
3730	17	chr17:78264358	RNF213	G	T	0.005556	0	1	89	0.01111	0.01105	1	17:78264358-78264358	G	intron_variant	MODIFIER	RNF213	ENSG00000173821	Transcript	ENST00000582970.1	protein_coding	-	6/67	ENST00000582970.1:c.1113-11T>G	-	-	-	-	-	-	-	-	1	-	HGNC	14539	YES	-	-	-	CCDS58606.1	ENSP00000464087	Q63HN8	H3BLU6	UPI0001D3BDB1	-	-	-	-
3734	17	chr17:78268717	RNF213	T	A	0.005556	0	1	89	0.01111	0.01105	1	17:78268717-78268717	T	missense_variant	MODERATE	RNF213	ENSG00000173821	Transcript	ENST00000582970.1	protein_coding	9/68	-	ENST00000582970.1:c.1670A>T	ENSP00000464087.1:p.Glu557Val	1813	1670	557	E/V	gAg/gTg	-	-	1	-	HGNC	14539	YES	-	-	-	CCDS58606.1	ENSP00000464087	Q63HN8	H3BLU6	UPI0001D3BDB1	tolerated(0.08)	benign(0.01)	hmmpanther:PTHR22605,hmmpanther:PTHR22605:SF5	-
3754	17	chr17:78319102	RNF213	T	C	0.005556	0	1	89	0.01111	0.01105	1	17:78319102-78319102	T	stop_gained	HIGH	RNF213	ENSG00000173821	Transcript	ENST00000582970.1	protein_coding	29/68	-	ENST00000582970.1:c.6967C>T	ENSP00000464087.1:p.Gln2323Ter	7110	6967	2323	Q/*	Cag/Tag	-	-	1	-	HGNC	14539	YES	-	-	-	CCDS58606.1	ENSP00000464087	Q63HN8	H3BLU6	UPI0001D3BDB1	-	-	hmmpanther:PTHR22605,hmmpanther:PTHR22605:SF5	-
3777	17	chr17:78351613	RNF213	T	A	0.01111	0	2	88	0.02222	0.02198	1	17:78351613-78351613	T	intron_variant	MODIFIER	RNF213	ENSG00000173821	Transcript	ENST00000582970.1	protein_coding	-	54/67	ENST00000582970.1:c.13545+17A>T	-	-	-	-	-	-	-	-	1	-	HGNC	14539	YES	-	-	-	CCDS58606.1	ENSP00000464087	Q63HN8	H3BLU6	UPI0001D3BDB1	-	-	-	-
3782	17	chr17:78357518	RNF213	C	-	0.005556	0	1	89	0.01111	0.01105	1	17:78357517-78357517	C	frameshift_variant	HIGH	RNF213	ENSG00000173821	Transcript	ENST00000582970.1	protein_coding	59/68	-	ENST00000582970.1:c.14113dup	ENSP00000464087.1:p.Gln4705ProfsTer3	14254-14255	14111-14112	4704	S/SX	agc/agCc	-	-	1	-	HGNC	14539	YES	-	-	-	CCDS58606.1	ENSP00000464087	Q63HN8	H3BLU6	UPI0001D3BDB1	-	-	hmmpanther:PTHR22605,hmmpanther:PTHR22605:SF5	2
1656	6	chr6:117710658	ROS1	G	T	0.005556	0	1	89	0.01111	0.01105	1	6:117710658-117710658	G	missense_variant	MODERATE	ROS1	ENSG00000047936	Transcript	ENST00000368508.3	protein_coding	12/43	-	ENST00000368508.3:c.1614A>C	ENSP00000357494.3:p.Glu538Asp	1813	1614	538	E/D	gaA/gaC	-	-	-1	-	HGNC	10261	YES	-	-	-	CCDS5116.1	ENSP00000357494	P08922	-	UPI000013D467	tolerated(0.12)	probably_damaging(0.912)	hmmpanther:PTHR24416,hmmpanther:PTHR24416:SF304	-
1838	6	chr6:166952128	RPS6KA2	T	C	0.005556	0	1	89	0.01111	0.01105	1	6:166952128-166952128	T	intron_variant	MODIFIER	RPS6KA2	ENSG00000071242	Transcript	ENST00000503859.1	protein_coding	-	3/21	ENST00000503859.1:c.240+28G>A	-	-	-	-	-	-	-	-	-1	-	HGNC	10431	YES	-	-	-	CCDS34570.1	ENSP00000427015	Q15349	D6RHW7,D6RD75,D6R910,B7Z3B5	UPI000020D48C	-	-	-	-
2246	8	chr8:92972668	RUNX1T1	C	G	0.01111	1	0	89	0	0.02198	0.005587	8:92972668-92972668	C	missense_variant	MODERATE	RUNX1T1	ENSG00000079102	Transcript	ENST00000436581.2	protein_coding	11/11	-	ENST00000436581.2:c.1650C>G	ENSP00000402257.2:p.Cys550Trp	1661	1650	550	C/W	tgC/tgG	-	-	-1	-	HGNC	1535	YES	-	-	-	CCDS56544.1	ENSP00000402257	Q06455	Q9HBV9,E5RK76,E5RJB3,E5RHJ8,E5RH72,E5RH30,E5RG85	UPI0001D5F276	deleterious(0)	probably_damaging(1)	Pfam_domain:PF01753,Prints_domain:PR01875,PROSITE_patterns:PS01360,PROSITE_profiles:PS50865,hmmpanther:PTHR10379,hmmpanther:PTHR10379:SF5,Superfamily_domains:SSF144232	-
2248	8	chr8:93026955	RUNX1T1	A	G	0.005556	0	1	89	0.01111	0.01105	1	8:93026955-93026955	A	missense_variant	MODERATE	RUNX1T1	ENSG00000079102	Transcript	ENST00000436581.2	protein_coding	3/11	-	ENST00000436581.2:c.353C>T	ENSP00000402257.2:p.Ser118Phe	364	353	118	S/F	tCc/tTc	-	-	-1	-	HGNC	1535	YES	-	-	-	CCDS56544.1	ENSP00000402257	Q06455	Q9HBV9,E5RK76,E5RJB3,E5RHJ8,E5RH72,E5RH30,E5RG85	UPI0001D5F276	deleterious(0)	possibly_damaging(0.786)	hmmpanther:PTHR10379,hmmpanther:PTHR10379:SF5,Low_complexity_(Seg):seg	-
2249	8	chr8:93029480	RUNX1T1	A	C	0.005556	0	1	89	0.01111	0.01105	1	8:93029480-93029480	A	missense_variant	MODERATE	RUNX1T1	ENSG00000079102	Transcript	ENST00000436581.2	protein_coding	2/11	-	ENST00000436581.2:c.233G>T	ENSP00000402257.2:p.Arg78Ile	244	233	78	R/I	aGa/aTa	-	-	-1	-	HGNC	1535	YES	-	-	-	CCDS56544.1	ENSP00000402257	Q06455	Q9HBV9,E5RK76,E5RJB3,E5RHJ8,E5RH72,E5RH30,E5RG85	UPI0001D5F276	deleterious(0)	probably_damaging(0.971)	hmmpanther:PTHR10379,hmmpanther:PTHR10379:SF5	-
1209	5	chr5:233504	SDHA	C	T	0.01667	0	3	87	0.03333	0.03278	1	5:233504-233504	C	intron_variant	MODIFIER	SDHA	ENSG00000073578	Transcript	ENST00000264932.6	protein_coding	-	7/14	ENST00000264932.6:c.896-88T>C	-	-	-	-	-	-	-	-	1	-	HGNC	10680	YES	-	-	-	CCDS3853.1	ENSP00000264932	P31040	Q0QF12,B3KT34	UPI0000000C2C	-	-	-	-
887	3	chr3:47155487	SETD2	A	G	0.005556	0	1	89	0.01111	0.01105	1	3:47155487-47155487	A	missense_variant	MODERATE	SETD2	ENSG00000181555	Transcript	ENST00000409792.3	protein_coding	5/21	-	ENST00000409792.3:c.4594C>T	ENSP00000386759.3:p.Arg1532Trp	4637	4594	1532	R/W	Cgg/Tgg	-	-	-1	-	HGNC	18420	YES	-	-	-	CCDS2749.2	ENSP00000386759	Q9BYW2	C9JG86	UPI00017E10FB	deleterious(0)	probably_damaging(0.998)	PROSITE_profiles:PS51215,hmmpanther:PTHR22884,hmmpanther:PTHR22884:SF294,Gene3D:2.170.270.10,SMART_domains:SM00570,Superfamily_domains:SSF82199	-
892	3	chr3:47163994	SETD2	G	A	0.005556	0	1	89	0.01111	0.01105	1	3:47163994-47163994	G	missense_variant	MODERATE	SETD2	ENSG00000181555	Transcript	ENST00000409792.3	protein_coding	3/21	-	ENST00000409792.3:c.2132T>C	ENSP00000386759.3:p.Val711Ala	2175	2132	711	V/A	gTc/gCc	-	-	-1	-	HGNC	18420	YES	-	-	-	CCDS2749.2	ENSP00000386759	Q9BYW2	C9JG86	UPI00017E10FB	tolerated_low_confidence(0.12)	benign(0)	hmmpanther:PTHR22884,hmmpanther:PTHR22884:SF294	-
682	2	chr2:198262720	SF3B1	G	T	0.005556	0	1	89	0.01111	0.01105	1	2:198262720-198262720	G	synonymous_variant	LOW	SF3B1	ENSG00000115524	Transcript	ENST00000335508.6	protein_coding	22/25	-	ENST00000335508.6:c.3255A>C	ENSP00000335321.5:p.Ala1085%3D	3347	3255	1085	A	gcA/gcC	-	-	-1	-	HGNC	10768	YES	-	-	-	CCDS33356.1	ENSP00000335321	O75533	Q9NTB4,F8WC19	UPI000013D493	-	-	Gene3D:1.25.10.10,hmmpanther:PTHR12097,Superfamily_domains:SSF48371	-
1674	6	chr6:134498787	SGK1	T	C	0.005556	0	1	89	0.01111	0.01105	1	6:134498787-134498787	T	intron_variant	MODIFIER	SGK1	ENSG00000118515	Transcript	ENST00000367858.5	protein_coding	-	3/13	ENST00000367858.5:c.362-3063G>A	-	-	-	-	-	-	-	-	-1	-	HGNC	10810	YES	-	-	-	CCDS47476.1	ENSP00000356832	O00141	E9PP33,E9PJN2,B7Z1G1	UPI000013CA0E	-	-	-	-
1675	6	chr6:134528524	SGK1	A	G	0.005556	0	1	89	0.01111	0.01105	1	6:134528524-134528524	A	missense_variant	MODERATE	SGK1	ENSG00000118515	Transcript	ENST00000367858.5	protein_coding	3/14	-	ENST00000367858.5:c.331C>T	ENSP00000356832.5:p.Pro111Ser	929	331	111	P/S	Cca/Tca	-	-	-1	-	HGNC	10810	YES	-	-	-	CCDS47476.1	ENSP00000356832	O00141	E9PP33,E9PJN2,B7Z1G1	UPI000013CA0E	tolerated(0.12)	benign(0.026)	hmmpanther:PTHR24356:SF148,hmmpanther:PTHR24356,Gene3D:3.30.1520.10,Superfamily_domains:SSF64268	-
3818	18	chr18:48575204	SMAD4	T	A	0.005556	0	1	89	0.01111	0.01105	1	18:48575204-48575204	T	missense_variant	MODERATE	SMAD4	ENSG00000141646	Transcript	ENST00000342988.3	protein_coding	3/12	-	ENST00000342988.3:c.398A>T	ENSP00000341551.3:p.Tyr133Phe	936	398	133	Y/F	tAc/tTc	-	-	1	-	HGNC	6770	YES	-	-	-	CCDS11950.1	ENSP00000341551	Q13485	Q9BYG6,K7ENG8,K7ENG1,K7EL18,K7EL15,K7EIJ2	UPI0000053431	deleterious(0.01)	probably_damaging(0.998)	Superfamily_domains:0040928,Gene3D:1ozjA00,Pfam_domain:PF03165,PROSITE_profiles:PS51075,hmmpanther:PTHR13703,hmmpanther:PTHR13703:SF33,SMART_domains:SM00523	-
3824	18	chr18:48593440	SMAD4	C	T	0.005556	0	1	89	0.01111	0.01105	1	18:48593440-48593440	C	synonymous_variant	LOW	SMAD4	ENSG00000141646	Transcript	ENST00000342988.3	protein_coding	10/12	-	ENST00000342988.3:c.1191T>C	ENSP00000341551.3:p.Val397%3D	1729	1191	397	V	gtT/gtC	-	-	1	-	HGNC	6770	YES	-	-	-	CCDS11950.1	ENSP00000341551	Q13485	Q9BYG6,K7ENG8,K7ENG1,K7EL18,K7EL15,K7EIJ2	UPI0000053431	-	-	Gene3D:2.60.200.10,Pfam_domain:PF03166,PROSITE_profiles:PS51076,hmmpanther:PTHR13703,hmmpanther:PTHR13703:SF33,SMART_domains:SM00524,Superfamily_domains:SSF49879	-
3921	19	chr19:11170500	SMARCA4	T	C	0.005556	0	1	89	0.01111	0.01105	1	19:11170500-11170500	T	synonymous_variant	LOW	SMARCA4	ENSG00000127616	Transcript	ENST00000429416.3	protein_coding	34/36	-	ENST00000429416.3:c.4707C>T	ENSP00000395654.1:p.Asp1569%3D	4988	4707	1569	D	gaC/gaT	-	-	1	-	HGNC	11100	YES	-	-	-	CCDS12253.1	ENSP00000395654	P51532	B4DSI8,A7E2E1	UPI000006F973	-	-	Superfamily_domains:SSF47370,hmmpanther:PTHR10799:SF76,hmmpanther:PTHR10799,Low_complexity_(Seg):seg	-
4101	22	chr22:24145672	SMARCB1	C	-	0.03333	3	0	87	0	0.06444	2.705e-006	22:24145671-24145671	C	intron_variant	MODIFIER	SMARCB1	ENSG00000099956	Transcript	ENST00000263121.7	protein_coding	-	5/8	ENST00000263121.7:c.628+65dup	-	-	-	-	-	-	-	-	1	-	HGNC	11103	YES	-	-	-	CCDS13817.1	ENSP00000263121	Q12824	-	UPI00000019FA	-	-	-	3
4106	22	chr22:24167632	SMARCB1	C	T	0.03333	0	6	84	0.06667	0.06444	1	22:24167632-24167632	C	intron_variant	MODIFIER	SMARCB1	ENSG00000099956	Transcript	ENST00000263121.7	protein_coding	-	7/8	ENST00000263121.7:c.986+30T>C	-	-	-	-	-	-	-	-	1	-	HGNC	11103	YES	-	-	-	CCDS13817.1	ENSP00000263121	Q12824	-	UPI00000019FA	-	-	-	-
487	2	chr2:5833816	SOX11	T	-	0.01111	1	0	89	0	0.02198	0.005587	2:5833815-5833815	T	frameshift_variant	HIGH	SOX11	ENSG00000176887	Transcript	ENST00000322002.3	protein_coding	1/1	-	ENST00000322002.3:c.962_963insT	ENSP00000322568.3:p.Gln321HisfsTer77	1017-1018	962-963	321	Q/HX	cag/caTg	-	-	1	-	HGNC	11191	YES	-	-	-	CCDS1654.1	ENSP00000322568	P35716	Q05CH0	UPI00001362AD	-	-	hmmpanther:PTHR10270:SF113,hmmpanther:PTHR10270,PIRSF_domain:PIRSF038098	-
1021	3	chr3:181430876	SOX2	C	T	0.005556	0	1	89	0.01111	0.01105	1	3:181430876-181430876	C	missense_variant	MODERATE	SOX2	ENSG00000181449	Transcript	ENST00000325404.1	protein_coding	1/1	-	ENST00000325404.1:c.728T>C	ENSP00000323588.1:p.Val243Ala	1155	728	243	V/A	gTg/gCg	-	-	1	-	HGNC	11195	YES	-	-	-	CCDS3239.1	ENSP00000323588	P48431	-	UPI000003F545	tolerated(0.34)	benign(0.028)	hmmpanther:PTHR10270:SF47,hmmpanther:PTHR10270	-
4010	20	chr20:36031361	SRC	T	C	0.005556	0	1	89	0.01111	0.01105	1	20:36031361-36031361	T	intron_variant	MODIFIER	SRC	ENSG00000197122	Transcript	ENST00000373578.2	protein_coding	-	13/13	ENST00000373578.2:c.1402+78C>T	-	-	-	-	-	-	-	-	1	-	HGNC	11283	YES	-	-	-	CCDS13294.1	ENSP00000362680	P12931	Q9H7V3,Q71UK5	UPI0000000CB3	-	-	-	-
4011	20	chr20:36031767	SRC	G	C	0.01111	0	2	88	0.02222	0.02198	1	20:36031767-36031767	G	synonymous_variant	LOW	SRC	ENSG00000197122	Transcript	ENST00000373578.2	protein_coding	14/14	-	ENST00000373578.2:c.1596C>G	ENSP00000362680.2:p.Pro532%3D	1945	1596	532	P	ccC/ccG	-	-	1	-	HGNC	11283	YES	-	-	-	CCDS13294.1	ENSP00000362680	P12931	Q9H7V3,Q71UK5	UPI0000000CB3	-	-	hmmpanther:PTHR24418,hmmpanther:PTHR24418:SF53	-
746	2	chr2:219544800	STK36	T	C	0.005556	0	1	89	0.01111	0.01105	1	2:219544800-219544800	T	missense_variant	MODERATE	STK36	ENSG00000163482	Transcript	ENST00000295709.3	protein_coding	9/27	-	ENST00000295709.3:c.1133C>T	ENSP00000295709.3:p.Pro378Leu	1412	1133	378	P/L	cCt/cTt	-	-	1	-	HGNC	17209	YES	-	-	-	CCDS2421.1	ENSP00000295709	Q9NRP7	C9JDA4,C9J1B8	UPI00000342FC	tolerated(0.08)	benign(0.079)	hmmpanther:PTHR22983:SF6,hmmpanther:PTHR22983,Superfamily_domains:SSF48371	-
2675	10	chr10:104357022	SUFU	T	C	0.005556	0	1	89	0.01111	0.01105	1	10:104357022-104357022	T	synonymous_variant	LOW	SUFU	ENSG00000107882	Transcript	ENST00000369902.3	protein_coding	7/12	-	ENST00000369902.3:c.882C>T	ENSP00000358918.3:p.Gly294%3D	1048	882	294	G	ggC/ggT	-	-	1	-	HGNC	16466	YES	-	-	-	CCDS7537.1	ENSP00000358918	Q9UMX1	-	UPI0000073C79	-	-	Pfam_domain:PF12470,PIRSF_domain:PIRSF011844,hmmpanther:PTHR10928,hmmpanther:PTHR10928:SF2	-
2433	9	chr9:93606313	SYK	A	C	0.005556	0	1	89	0.01111	0.01105	1	9:93606313-93606313	A	missense_variant	MODERATE	SYK	ENSG00000165025	Transcript	ENST00000375754.4	protein_coding	2/14	-	ENST00000375754.4:c.133C>A	ENSP00000364907.4:p.Arg45Ser	281	133	45	R/S	Cgc/Agc	-	-	1	-	HGNC	11491	YES	-	-	-	CCDS6688.1	ENSP00000364907	P43405	-	UPI000012E0DD	deleterious(0.02)	probably_damaging(1)	PROSITE_profiles:PS50001,Pfam_domain:PF00017,Gene3D:3.30.505.10,PIRSF_domain:PIRSF000604,SMART_domains:SM00252,Superfamily_domains:SSF55550	-
1703	6	chr6:152457915	SYNE1	T	G	0.005556	0	1	89	0.01111	0.01105	1	6:152457915-152457915	T	synonymous_variant	LOW	SYNE1	ENSG00000131018	Transcript	ENST00000367255.5	protein_coding	141/146	-	ENST00000367255.5:c.25497C>A	ENSP00000356224.5:p.Ile8499%3D	26099	25497	8499	I	atC/atA	-	-	-1	-	HGNC	17089	YES	-	-	-	CCDS5236.2	ENSP00000356224	Q8NF91	-	UPI000204AF58	-	-	Gene3D:1.20.58.60,Pfam_domain:PF00435,hmmpanther:PTHR11915,hmmpanther:PTHR11915:SF267,SMART_domains:SM00150,Superfamily_domains:SSF46966	-
1712	6	chr6:152470784	SYNE1	T	G	0.005556	0	1	89	0.01111	0.01105	1	6:152470784-152470784	T	stop_gained	HIGH	SYNE1	ENSG00000131018	Transcript	ENST00000367255.5	protein_coding	136/146	-	ENST00000367255.5:c.24470C>A	ENSP00000356224.5:p.Ser8157Ter	25072	24470	8157	S/*	tCa/tAa	-	-	-1	-	HGNC	17089	YES	-	-	-	CCDS5236.2	ENSP00000356224	Q8NF91	-	UPI000204AF58	-	-	Gene3D:1.20.58.60,Pfam_domain:PF00435,hmmpanther:PTHR11915,hmmpanther:PTHR11915:SF267,SMART_domains:SM00150,Superfamily_domains:SSF46966	-
1713	6	chr6:152472812	SYNE1	C	T	0.005556	0	1	89	0.01111	0.01105	1	6:152472812-152472812	C	missense_variant	MODERATE	SYNE1	ENSG00000131018	Transcript	ENST00000367255.5	protein_coding	135/146	-	ENST00000367255.5:c.24326A>G	ENSP00000356224.5:p.Gln8109Arg	24928	24326	8109	Q/R	cAg/cGg	-	-	-1	-	HGNC	17089	YES	-	-	-	CCDS5236.2	ENSP00000356224	Q8NF91	-	UPI000204AF58	-	probably_damaging(0.993)	hmmpanther:PTHR11915,hmmpanther:PTHR11915:SF267,Superfamily_domains:SSF46966	-
1721	6	chr6:152529254	SYNE1	A	G	0.005556	0	1	89	0.01111	0.01105	1	6:152529254-152529254	A	synonymous_variant	LOW	SYNE1	ENSG00000131018	Transcript	ENST00000367255.5	protein_coding	125/146	-	ENST00000367255.5:c.22677C>T	ENSP00000356224.5:p.Asp7559%3D	23279	22677	7559	D	gaC/gaT	-	-	-1	-	HGNC	17089	YES	-	-	-	CCDS5236.2	ENSP00000356224	Q8NF91	-	UPI000204AF58	-	-	hmmpanther:PTHR11915,hmmpanther:PTHR11915:SF267,SMART_domains:SM00150	-
1725	6	chr6:152542688	SYNE1	C	G	0.005556	0	1	89	0.01111	0.01105	1	6:152542688-152542688	C	missense_variant	MODERATE	SYNE1	ENSG00000131018	Transcript	ENST00000367255.5	protein_coding	118/146	-	ENST00000367255.5:c.21529C>G	ENSP00000356224.5:p.Gln7177Glu	22131	21529	7177	Q/E	Caa/Gaa	-	-	-1	-	HGNC	17089	YES	-	-	-	CCDS5236.2	ENSP00000356224	Q8NF91	-	UPI000204AF58	-	possibly_damaging(0.559)	Gene3D:1.20.58.60,Coiled-coils_(Ncoils):Coil,Pfam_domain:PF00435,hmmpanther:PTHR11915,hmmpanther:PTHR11915:SF267,SMART_domains:SM00150,Superfamily_domains:SSF46966,Low_complexity_(Seg):seg	-
1740	6	chr6:152631545	SYNE1	A	G	0.005556	0	1	89	0.01111	0.01105	1	6:152631545-152631545	A	missense_variant	MODERATE	SYNE1	ENSG00000131018	Transcript	ENST00000367255.5	protein_coding	89/146	-	ENST00000367255.5:c.17005C>T	ENSP00000356224.5:p.Leu5669Phe	17607	17005	5669	L/F	Ctc/Ttc	-	-	-1	-	HGNC	17089	YES	-	-	-	CCDS5236.2	ENSP00000356224	Q8NF91	-	UPI000204AF58	-	probably_damaging(0.998)	hmmpanther:PTHR11915,hmmpanther:PTHR11915:SF267,SMART_domains:SM00150,Superfamily_domains:SSF46966	-
1741	6	chr6:152631970	SYNE1	A	C	0.005556	0	1	89	0.01111	0.01105	1	6:152631970-152631970	A	synonymous_variant	LOW	SYNE1	ENSG00000131018	Transcript	ENST00000367255.5	protein_coding	88/146	-	ENST00000367255.5:c.16749G>T	ENSP00000356224.5:p.Leu5583%3D	17351	16749	5583	L	ctG/ctT	-	-	-1	-	HGNC	17089	YES	-	-	-	CCDS5236.2	ENSP00000356224	Q8NF91	-	UPI000204AF58	-	-	Coiled-coils_(Ncoils):Coil,hmmpanther:PTHR11915,hmmpanther:PTHR11915:SF267,SMART_domains:SM00150,Superfamily_domains:SSF46966	-
1742	6	chr6:152639288	SYNE1	A	C	0.005556	0	1	89	0.01111	0.01105	1	6:152639288-152639288	A	missense_variant	MODERATE	SYNE1	ENSG00000131018	Transcript	ENST00000367255.5	protein_coding	86/146	-	ENST00000367255.5:c.16500G>T	ENSP00000356224.5:p.Lys5500Asn	17102	16500	5500	K/N	aaG/aaT	-	-	-1	-	HGNC	17089	YES	-	-	-	CCDS5236.2	ENSP00000356224	Q8NF91	-	UPI000204AF58	-	benign(0.118)	hmmpanther:PTHR11915,hmmpanther:PTHR11915:SF267,SMART_domains:SM00150,Superfamily_domains:SSF46966	-
1744	6	chr6:152644654	SYNE1	A	C	0.005556	0	1	89	0.01111	0.01105	1	6:152644654-152644654	A	synonymous_variant	LOW	SYNE1	ENSG00000131018	Transcript	ENST00000367255.5	protein_coding	82/146	-	ENST00000367255.5:c.15876G>T	ENSP00000356224.5:p.Pro5292%3D	16478	15876	5292	P	ccG/ccT	-	-	-1	-	HGNC	17089	YES	-	-	-	CCDS5236.2	ENSP00000356224	Q8NF91	-	UPI000204AF58	-	-	hmmpanther:PTHR11915,hmmpanther:PTHR11915:SF267,SMART_domains:SM00150	-
1752	6	chr6:152652197	SYNE1	C	A	0.005556	0	1	89	0.01111	0.01105	1	6:152652197-152652197	C	missense_variant	MODERATE	SYNE1	ENSG00000131018	Transcript	ENST00000367255.5	protein_coding	78/146	-	ENST00000367255.5:c.13623T>G	ENSP00000356224.5:p.Ser4541Arg	14225	13623	4541	S/R	agT/agG	-	-	-1	-	HGNC	17089	YES	-	-	-	CCDS5236.2	ENSP00000356224	Q8NF91	-	UPI000204AF58	-	benign(0.168)	Gene3D:1.20.58.60,hmmpanther:PTHR11915,hmmpanther:PTHR11915:SF267,SMART_domains:SM00150,Superfamily_domains:SSF46966	-
1764	6	chr6:152674791	SYNE1	C	T	0.005556	0	1	89	0.01111	0.01105	1	6:152674791-152674791	C	missense_variant	MODERATE	SYNE1	ENSG00000131018	Transcript	ENST00000367255.5	protein_coding	68/146	-	ENST00000367255.5:c.11015A>G	ENSP00000356224.5:p.Asn3672Ser	11617	11015	3672	N/S	aAc/aGc	-	-	-1	-	HGNC	17089	YES	-	-	-	CCDS5236.2	ENSP00000356224	Q8NF91	-	UPI000204AF58	-	benign(0)	hmmpanther:PTHR11915,hmmpanther:PTHR11915:SF267,SMART_domains:SM00150,Superfamily_domains:SSF46966	-
1782	6	chr6:152712677	SYNE1	A	C	0.005556	0	1	89	0.01111	0.01105	1	6:152712677-152712677	A	missense_variant	MODERATE	SYNE1	ENSG00000131018	Transcript	ENST00000367255.5	protein_coding	52/146	-	ENST00000367255.5:c.7739G>T	ENSP00000356224.5:p.Arg2580Ile	8341	7739	2580	R/I	aGa/aTa	-	-	-1	-	HGNC	17089	YES	-	-	-	CCDS5236.2	ENSP00000356224	Q8NF91	-	UPI000204AF58	-	benign(0.003)	Gene3D:1.20.58.60,hmmpanther:PTHR11915,hmmpanther:PTHR11915:SF267,SMART_domains:SM00150,Superfamily_domains:SSF46966	-
1805	6	chr6:152823897	SYNE1	T	A	0.005556	0	1	89	0.01111	0.01105	1	6:152823897-152823897	T	intron_variant	MODIFIER	SYNE1	ENSG00000131018	Transcript	ENST00000367255.5	protein_coding	-	9/145	ENST00000367255.5:c.779-20T>A	-	-	-	-	-	-	-	-	-1	-	HGNC	17089	YES	-	-	-	CCDS5236.2	ENSP00000356224	Q8NF91	-	UPI000204AF58	-	-	-	-
4229	23	chrX:70597573	TAF1	C	G	0.008	0	1	34	0.02857	0.02816	1	X:70597573-70597573	C	missense_variant	MODERATE	TAF1	ENSG00000147133	Transcript	ENST00000276072.3	protein_coding	6/38	-	ENST00000276072.3:c.895G>C	ENSP00000276072.3:p.Val299Leu	905	895	299	V/L	Gtg/Ctg	-	-	1	-	HGNC	11535	YES	-	-	-	CCDS14412.1	ENSP00000276072	P21675	-	UPI000013DA9F	tolerated(0.3)	benign(0)	Low_complexity_(Seg):seg,hmmpanther:PTHR13900:SF0,hmmpanther:PTHR13900,PIRSF_domain:PIRSF003047	-
4235	23	chrX:70683793	TAF1	T	C	0	0	0	35	0	0	1	X:70683793-70683793	T	missense_variant	MODERATE	TAF1	ENSG00000147133	Transcript	ENST00000276072.3	protein_coding	38/38	-	ENST00000276072.3:c.5579C>T	ENSP00000276072.3:p.Ser1860Phe	5589	5579	1860	S/F	tCt/tTt	-	-	1	-	HGNC	11535	YES	-	-	-	CCDS14412.1	ENSP00000276072	P21675	-	UPI000013DA9F	tolerated_low_confidence(0.68)	benign(0.147)	PIRSF_domain:PIRSF003047	-
2411	9	chr9:32631748	TAF1L	A	G	0.005556	0	1	89	0.01111	0.01105	1	9:32631748-32631748	A	missense_variant	MODERATE	TAF1L	ENSG00000122728	Transcript	ENST00000242310.4	protein_coding	1/1	-	ENST00000242310.4:c.3830C>T	ENSP00000418379.1:p.Pro1277Leu	3920	3830	1277	P/L	cCt/cTt	-	-	-1	-	HGNC	18056	YES	-	-	-	CCDS35003.1	ENSP00000418379	Q8IZX4	-	UPI000007408A	tolerated(0.08)	benign(0.093)	Low_complexity_(Seg):seg,hmmpanther:PTHR13900,hmmpanther:PTHR13900:SF0,PIRSF_domain:PIRSF003047	-
4240	23	chrX:79279609	TBX22	C	G	0.008	0	1	34	0.02857	0.02816	1	X:79279609-79279609	C	missense_variant	MODERATE	TBX22	ENSG00000122145	Transcript	ENST00000373294.5	protein_coding	3/8	-	ENST00000373294.5:c.404G>C	ENSP00000362390.5:p.Gly135Ala	432	404	135	G/A	gGg/gCg	-	-	1	-	HGNC	11600	YES	-	-	-	CCDS14445.1	ENSP00000362390	Q9Y458	C3TX51	UPI00001377ED	tolerated(0.6)	benign(0.005)	Gene3D:1h6fA00,Pfam_domain:PF00907,PROSITE_profiles:PS50252,hmmpanther:PTHR11267,hmmpanther:PTHR11267:SF97,SMART_domains:SM00425,Superfamily_domains:SSF49417	-
3877	19	chr19:1646325	TCF3	CGAG	-	0.01111	0	2	88	0.02222	0.02198	1	19:1646324-1646324	CGAG	intron_variant	MODIFIER	TCF3	ENSG00000071564	Transcript	ENST00000262965.5	protein_coding	-	3/18	ENST00000262965.5:c.145+26_145+29dup	-	-	-	-	-	-	-	-	-1	-	HGNC	11633	YES	-	-	-	CCDS12074.1	ENSP00000262965	P15923	Q6PJU3,K7EPS2,K7ENI0,K7EKB9,B1NYC3	UPI0000136C80	-	-	-	-
573	2	chr2:85534779	TCF7L1	-	GAGG	0.005556	0	1	89	0.01111	0.01105	1	2:85534778-85534782	-	frameshift_variant	HIGH	TCF7L1	ENSG00000152284	Transcript	ENST00000282111.3	protein_coding	11/12	-	ENST00000282111.3:c.1272_1275del	ENSP00000282111.3:p.Lys426GlufsTer176	1547-1550	1272-1275	424-425	KR/X	aaGAGG/aa	-	-	1	-	HGNC	11640	YES	-	-	-	CCDS1971.1	ENSP00000282111	Q9HCS4	Q53T87,C9JPE3	UPI0000136846	-	-	Gene3D:1.10.30.10,hmmpanther:PTHR10373,hmmpanther:PTHR10373:SF25,Superfamily_domains:SSF47095,Low_complexity_(Seg):seg	-
2680	10	chr10:114710518	TCF7L2	T	G	0.005556	0	1	89	0.01111	0.01105	1	10:114710518-114710518	T	start_lost	HIGH	TCF7L2	ENSG00000148737	Transcript	ENST00000543371.1	protein_coding	1/14	-	ENST00000543371.1:c.3G>T	ENSP00000444972.1:p.Met1?	510	3	1	M/I	atG/atT	-	-	1	-	HGNC	11641	YES	-	-	-	CCDS53577.1	ENSP00000444972	Q9NQB0	E2GH26,C6ZRJ8	UPI000002B4A6	deleterious(0)	possibly_damaging(0.774)	Gene3D:4.10.900.10,Pfam_domain:PF08347	-
2684	10	chr10:114911539	TCF7L2	T	C	0.005556	0	1	89	0.01111	0.01105	1	10:114911539-114911539	T	missense_variant	MODERATE	TCF7L2	ENSG00000148737	Transcript	ENST00000543371.1	protein_coding	10/14	-	ENST00000543371.1:c.1057C>T	ENSP00000444972.1:p.Pro353Ser	1564	1057	353	P/S	Cct/Tct	-	-	1	-	HGNC	11641	YES	-	-	-	CCDS53577.1	ENSP00000444972	Q9NQB0	E2GH26,C6ZRJ8	UPI000002B4A6	deleterious(0)	probably_damaging(1)	PROSITE_profiles:PS50118,hmmpanther:PTHR10373,hmmpanther:PTHR10373:SF32,Pfam_domain:PF00505,Gene3D:1.10.30.10,SMART_domains:SM00398,Superfamily_domains:SSF47095	-
2599	10	chr10:70332342	TET1	G	A	0.005556	0	1	89	0.01111	0.01105	1	10:70332342-70332342	G	missense_variant	MODERATE	TET1	ENSG00000138336	Transcript	ENST00000373644.4	protein_coding	2/12	-	ENST00000373644.4:c.247A>G	ENSP00000362748.4:p.Asn83Asp	456	247	83	N/D	Aat/Gat	-	-	1	-	HGNC	29484	YES	-	-	-	CCDS7281.1	ENSP00000362748	Q8NFU7	-	UPI000013D114	deleterious(0.01)	benign(0.031)	hmmpanther:PTHR23358,hmmpanther:PTHR23358:SF2	-
2609	10	chr10:70406386	TET1	A	C	0.01111	1	0	89	0	0.02198	0.005587	10:70406386-70406386	A	synonymous_variant	LOW	TET1	ENSG00000138336	Transcript	ENST00000373644.4	protein_coding	4/12	-	ENST00000373644.4:c.3900C>A	ENSP00000362748.4:p.Thr1300%3D	4109	3900	1300	T	acC/acA	-	-	1	-	HGNC	29484	YES	-	-	-	CCDS7281.1	ENSP00000362748	Q8NFU7	-	UPI000013D114	-	-	hmmpanther:PTHR23358,hmmpanther:PTHR23358:SF2	-
2614	10	chr10:70451510	TET1	A	T	0.005556	0	1	89	0.01111	0.01105	1	10:70451510-70451510	A	missense_variant	MODERATE	TET1	ENSG00000138336	Transcript	ENST00000373644.4	protein_coding	12/12	-	ENST00000373644.4:c.6350T>A	ENSP00000362748.4:p.Val2117Asp	6559	6350	2117	V/D	gTt/gAt	-	-	1	-	HGNC	29484	YES	-	-	-	CCDS7281.1	ENSP00000362748	Q8NFU7	-	UPI000013D114	deleterious(0)	possibly_damaging(0.515)	hmmpanther:PTHR23358,hmmpanther:PTHR23358:SF2	-
1187	4	chr4:106158026	TET2	T	A	0.005556	0	1	89	0.01111	0.01105	1	4:106158026-106158026	T	missense_variant	MODERATE	TET2	ENSG00000168769	Transcript	ENST00000540549.1	protein_coding	3/11	-	ENST00000540549.1:c.2927A>T	ENSP00000442788.1:p.Gln976Leu	3787	2927	976	Q/L	cAg/cTg	-	-	1	-	HGNC	25941	YES	-	-	-	CCDS47120.1	ENSP00000442788	Q6N021	E7EPB1,D6RE87	UPI00001D75E4	tolerated(0.07)	benign(0.012)	hmmpanther:PTHR23358:SF3,hmmpanther:PTHR23358	-
1191	4	chr4:106193885	TET2	-	T	0.005556	0	1	89	0.01111	0.01105	1	4:106193884-106193885	-	frameshift_variant	HIGH	TET2	ENSG00000168769	Transcript	ENST00000540549.1	protein_coding	10/11	-	ENST00000540549.1:c.4350del	ENSP00000442788.1:p.Arg1451GlyfsTer7	5207	4347	1449	S/X	tcT/tc	-	-	1	-	HGNC	25941	YES	-	-	-	CCDS47120.1	ENSP00000442788	Q6N021	E7EPB1,D6RE87	UPI00001D75E4	-	-	hmmpanther:PTHR23358:SF3,hmmpanther:PTHR23358,Pfam_domain:PF12851	3
4213	23	chrX:48896874	TFE3	T	C	0.008	0	1	34	0.02857	0.02816	1	X:48896874-48896874	T	missense_variant	MODERATE	TFE3	ENSG00000068323	Transcript	ENST00000315869.7	protein_coding	3/10	-	ENST00000315869.7:c.292G>A	ENSP00000314129.7:p.Ala98Thr	552	292	98	A/T	Gca/Aca	-	-	-1	-	HGNC	11752	YES	-	-	-	CCDS14315.3	ENSP00000314129	P19532	B4DIA5	UPI0000117AE8	tolerated(0.4)	benign(0.026)	hmmpanther:PTHR10014,hmmpanther:PTHR10014:SF37,Low_complexity_(Seg):seg	-
3203	15	chr15:39884882	THBS1	T	G	0.01111	0	2	88	0.02222	0.02198	1	15:39884882-39884882	T	missense_variant	MODERATE	THBS1	ENSG00000137801	Transcript	ENST00000260356.5	protein_coding	17/22	-	ENST00000260356.5:c.2646G>T	ENSP00000260356.5:p.Gln882His	2811	2646	882	Q/H	caG/caT	-	-	1	-	HGNC	11785	YES	-	-	-	CCDS32194.1	ENSP00000260356	P07996	Q7KYY3,A8MZG1,A0PJG0	UPI00001FE219	deleterious(0)	probably_damaging(0.996)	Superfamily_domains:0044556,Gene3D:1ux6A01,Pfam_domain:PF02412,PROSITE_profiles:PS51234,hmmpanther:PTHR10199,hmmpanther:PTHR10199:SF78	-
3569	17	chr17:7579634	TP53	-	C	0.005556	0	1	89	0.01111	0.01105	1	17:7579633-7579634	-	intron_variant	MODIFIER	TP53	ENSG00000141510	Transcript	ENST00000269305.4	protein_coding	-	2020-03-10	ENST00000269305.4:c.97-44del	-	-	-	-	-	-	-	-	-1	-	HGNC	11998	YES	-	-	-	CCDS11118.1	ENSP00000269305	P04637	S5LQU8,Q761V2,Q6IT77,Q1HGV1,Q0PKT5,L0ES54,L0EQ05,K7PPA8,H2EHT1,G4Y083,E9PCY9,E7ESS1,E7EMR6,B5AKF6,B4DNI2,A4GWD0,A4GWB8,A4GWB5,A4GW97,A4GW76,A4GW75,A4GW74,A4GW67,A2I9Z1,A2I9Z0	UPI000002ED67	-	-	-	-
370	1	chr1:186301473	TPR	T	A	0.005556	0	1	89	0.01111	0.01105	1	1:186301473-186301473	T	missense_variant,splice_region_variant	MODERATE	TPR	ENSG00000047410	Transcript	ENST00000367478.4	protein_coding	38/51	-	ENST00000367478.4:c.5458T>A	ENSP00000356448.3:p.Ser1820Thr	5755	5458	1820	S/T	Tcg/Acg	-	-	-1	-	HGNC	12017	YES	-	-	-	CCDS41446.1	ENSP00000356448	P12270	Q9UE33	UPI000046FCF4	deleterious(0.04)	benign(0.275)	hmmpanther:PTHR18898	-
372	1	chr1:186304551	TPR	G	A	0.005556	0	1	89	0.01111	0.01105	1	1:186304551-186304551	G	synonymous_variant	LOW	TPR	ENSG00000047410	Transcript	ENST00000367478.4	protein_coding	34/51	-	ENST00000367478.4:c.4830T>C	ENSP00000356448.3:p.Ile1610%3D	5127	4830	1610	I	atT/atC	-	-	-1	-	HGNC	12017	YES	-	-	-	CCDS41446.1	ENSP00000356448	P12270	Q9UE33	UPI000046FCF4	-	-	Coiled-coils_(Ncoils):Coil,hmmpanther:PTHR18898	-
374	1	chr1:186315243	TPR	T	-	0.01111	0	2	88	0.02222	0.02198	1	1:186315242-186315242	T	intron_variant	MODIFIER	TPR	ENSG00000047410	Transcript	ENST00000367478.4	protein_coding	-	23/50	ENST00000367478.4:c.3096+24_3096+25insA	-	-	-	-	-	-	-	-	-1	-	HGNC	12017	YES	-	-	-	CCDS41446.1	ENSP00000356448	P12270	Q9UE33	UPI000046FCF4	-	-	-	-
136	1	chr1:114940315	TRIM33	A	G	0.005556	0	1	89	0.01111	0.01105	1	1:114940315-114940315	A	synonymous_variant	LOW	TRIM33	ENSG00000197323	Transcript	ENST00000358465.2	protein_coding	20/20	-	ENST00000358465.2:c.3339C>T	ENSP00000351250.2:p.Arg1113%3D	3423	3339	1113	R	cgC/cgT	-	-	-1	-	HGNC	16290	YES	-	-	-	CCDS872.1	ENSP00000351250	Q9UPN9	-	UPI000013D8CD	-	-	-	-
141	1	chr1:114976234	TRIM33	T	C	0.005556	0	1	89	0.01111	0.01105	1	1:114976234-114976234	T	splice_region_variant,intron_variant	LOW	TRIM33	ENSG00000197323	Transcript	ENST00000358465.2	protein_coding	-	5/19	ENST00000358465.2:c.1040+5G>A	-	-	-	-	-	-	-	-	-1	-	HGNC	16290	YES	-	-	-	CCDS872.1	ENSP00000351250	Q9UPN9	-	UPI000013D8CD	-	-	-	-
3132	14	chr14:92454746	TRIP11	T	-	0.005556	0	1	89	0.01111	0.01105	1	14:92454745-92454745	T	intron_variant	MODIFIER	TRIP11	ENSG00000100815	Transcript	ENST00000267622.4	protein_coding	-	15/20	ENST00000267622.4:c.5161-19dup	-	-	-	-	-	-	-	-	-1	-	HGNC	12305	YES	-	-	-	CCDS9899.1	ENSP00000267622	Q15643	G3V4R7	UPI000013D767	-	-	-	-
3135	14	chr14:92461911	TRIP11	T	A	0.01111	0	2	88	0.02222	0.02198	1	14:92461911-92461911	T	intron_variant	MODIFIER	TRIP11	ENSG00000100815	Transcript	ENST00000267622.4	protein_coding	-	13/20	ENST00000267622.4:c.4893-52T>A	-	-	-	-	-	-	-	-	-1	-	HGNC	12305	YES	-	-	-	CCDS9899.1	ENSP00000267622	Q15643	G3V4R7	UPI000013D767	-	-	-	-
3141	14	chr14:92471880	TRIP11	T	C	0.005556	0	1	89	0.01111	0.01105	1	14:92471880-92471880	T	missense_variant	MODERATE	TRIP11	ENSG00000100815	Transcript	ENST00000267622.4	protein_coding	11/21	-	ENST00000267622.4:c.2440G>A	ENSP00000267622.4:p.Glu814Lys	2814	2440	814	E/K	Gaa/Aaa	-	-	-1	-	HGNC	12305	YES	-	-	-	CCDS9899.1	ENSP00000267622	Q15643	G3V4R7	UPI000013D767	deleterious(0)	possibly_damaging(0.547)	Coiled-coils_(Ncoils):Coil,hmmpanther:PTHR18921:SF2,hmmpanther:PTHR18921	-
1971	7	chr7:98543325	TRRAP	G	A	0.005556	0	1	89	0.01111	0.01105	1	7:98543325-98543325	G	intron_variant	MODIFIER	TRRAP	ENSG00000196367	Transcript	ENST00000359863.4	protein_coding	-	31/71	ENST00000359863.4:c.4474-45A>G	-	-	-	-	-	-	-	-	1	-	HGNC	12347	YES	-	-	-	CCDS59066.1	ENSP00000352925	Q9Y4A5	C9K0N1	UPI00004575B4	-	-	-	-
1973	7	chr7:98552756	TRRAP	C	A	0.005556	0	1	89	0.01111	0.01105	1	7:98552756-98552756	C	missense_variant	MODERATE	TRRAP	ENSG00000196367	Transcript	ENST00000359863.4	protein_coding	40/72	-	ENST00000359863.4:c.5745A>C	ENSP00000352925.4:p.Glu1915Asp	5954	5745	1915	E/D	gaA/gaC	-	-	1	-	HGNC	12347	YES	-	-	-	CCDS59066.1	ENSP00000352925	Q9Y4A5	C9K0N1	UPI00004575B4	tolerated(0.25)	benign(0.011)	hmmpanther:PTHR11139,hmmpanther:PTHR11139:SF1,Superfamily_domains:SSF48371	-
1974	7	chr7:98552760	TRRAP	T	C	0.005556	0	1	89	0.01111	0.01105	1	7:98552760-98552760	T	stop_gained	HIGH	TRRAP	ENSG00000196367	Transcript	ENST00000359863.4	protein_coding	40/72	-	ENST00000359863.4:c.5749C>T	ENSP00000352925.4:p.Arg1917Ter	5958	5749	1917	R/*	Cga/Tga	-	-	1	-	HGNC	12347	YES	-	-	-	CCDS59066.1	ENSP00000352925	Q9Y4A5	C9K0N1	UPI00004575B4	-	-	hmmpanther:PTHR11139,hmmpanther:PTHR11139:SF1,Superfamily_domains:SSF48371	-
1975	7	chr7:98552779	TRRAP	T	C	0.005556	0	1	89	0.01111	0.01105	1	7:98552779-98552779	T	missense_variant	MODERATE	TRRAP	ENSG00000196367	Transcript	ENST00000359863.4	protein_coding	40/72	-	ENST00000359863.4:c.5768C>T	ENSP00000352925.4:p.Ala1923Val	5977	5768	1923	A/V	gCg/gTg	-	-	1	-	HGNC	12347	YES	-	-	-	CCDS59066.1	ENSP00000352925	Q9Y4A5	C9K0N1	UPI00004575B4	deleterious(0)	probably_damaging(0.966)	hmmpanther:PTHR11139,hmmpanther:PTHR11139:SF1,Superfamily_domains:SSF48371	-
1982	7	chr7:98579357	TRRAP	T	C	0.005556	0	1	89	0.01111	0.01105	1	7:98579357-98579357	T	intron_variant	MODIFIER	TRRAP	ENSG00000196367	Transcript	ENST00000359863.4	protein_coding	-	57/71	ENST00000359863.4:c.8614-35C>T	-	-	-	-	-	-	-	-	1	-	HGNC	12347	YES	-	-	-	CCDS59066.1	ENSP00000352925	Q9Y4A5	C9K0N1	UPI00004575B4	-	-	-	-
3336	16	chr16:2129453	TSC2	T	-	0.02222	2	0	88	0	0.04346	9.469e-005	16:2129452-2129452	T	intron_variant	MODIFIER	TSC2	ENSG00000103197	Transcript	ENST00000219476.3	protein_coding	-	28/41	ENST00000219476.3:c.3284+23_3284+24insT	-	-	-	-	-	-	-	-	1	-	HGNC	12363	YES	-	-	-	CCDS10458.1	ENSP00000219476	P49815	-	UPI000013C781	-	-	-	-
3115	14	chr14:81554286	TSHR	C	T	0.005556	0	1	89	0.01111	0.01105	1	14:81554286-81554286	C	intron_variant	MODIFIER	TSHR	ENSG00000165409	Transcript	ENST00000541158.2	protein_coding	-	4/10	ENST00000541158.2:c.318-12T>C	-	-	-	-	-	-	-	-	1	-	HGNC	12373	YES	-	-	-	CCDS9872.1	ENSP00000441235	-	Q0VAP8,F5GYU5	UPI000013E4A2	-	-	-	-
3116	14	chr14:81554303	TSHR	G	T	0.005556	0	1	89	0.01111	0.01105	1	14:81554303-81554303	G	missense_variant	MODERATE	TSHR	ENSG00000165409	Transcript	ENST00000541158.2	protein_coding	5/11	-	ENST00000541158.2:c.323T>G	ENSP00000441235.2:p.Ile108Ser	645	323	108	I/S	aTt/aGt	-	-	1	-	HGNC	12373	YES	-	-	-	CCDS9872.1	ENSP00000441235	-	Q0VAP8,F5GYU5	UPI000013E4A2	deleterious(0)	probably_damaging(1)	Prints_domain:PR01145,Superfamily_domains:SSF52058,Pfam_domain:PF13855,Gene3D:3.80.10.10,hmmpanther:PTHR24372,hmmpanther:PTHR24372:SF0	-
3121	14	chr14:81606071	TSHR	A	G	0.005556	0	1	89	0.01111	0.01105	1	14:81606071-81606071	A	synonymous_variant	LOW	TSHR	ENSG00000165409	Transcript	ENST00000541158.2	protein_coding	10/11	-	ENST00000541158.2:c.741G>A	ENSP00000441235.2:p.Glu247%3D	1063	741	247	E	gaG/gaA	-	-	1	-	HGNC	12373	YES	-	-	-	CCDS9872.1	ENSP00000441235	-	Q0VAP8,F5GYU5	UPI000013E4A2	-	-	Superfamily_domains:SSF52058,Gene3D:3.80.10.10,hmmpanther:PTHR24372,hmmpanther:PTHR24372:SF0	-
2255	8	chr8:103284936	UBR5	T	C	0.005556	0	1	89	0.01111	0.01105	1	8:103284936-103284936	T	missense_variant	MODERATE	UBR5	ENSG00000104517	Transcript	ENST00000520539.1	protein_coding	48/59	-	ENST00000520539.1:c.6794G>A	ENSP00000429084.1:p.Arg2265Gln	7401	6794	2265	R/Q	cGa/cAa	-	-	-1	-	HGNC	16806	YES	-	-	-	CCDS34933.1	ENSP00000429084	O95071	Q49A65,E5RFK7,B3KML2	UPI0000129BCB	deleterious(0.01)	possibly_damaging(0.622)	hmmpanther:PTHR11254,hmmpanther:PTHR11254:SF77,Superfamily_domains:SSF56204	-
2257	8	chr8:103289351	UBR5	C	T	0.005556	0	1	89	0.01111	0.01105	1	8:103289351-103289351	C	missense_variant	MODERATE	UBR5	ENSG00000104517	Transcript	ENST00000520539.1	protein_coding	45/59	-	ENST00000520539.1:c.6358A>G	ENSP00000429084.1:p.Lys2120Glu	6965	6358	2120	K/E	Aaa/Gaa	-	-	-1	-	HGNC	16806	YES	-	-	-	CCDS34933.1	ENSP00000429084	O95071	Q49A65,E5RFK7,B3KML2	UPI0000129BCB	tolerated(0.95)	benign(0.003)	Coiled-coils_(Ncoils):Coil,hmmpanther:PTHR11254,hmmpanther:PTHR11254:SF77	-
2261	8	chr8:103297404	UBR5	G	T	0.005556	0	1	89	0.01111	0.01105	1	8:103297404-103297404	G	synonymous_variant	LOW	UBR5	ENSG00000104517	Transcript	ENST00000520539.1	protein_coding	40/59	-	ENST00000520539.1:c.5647A>C	ENSP00000429084.1:p.Arg1883%3D	6254	5647	1883	R	Agg/Cgg	-	-	-1	-	HGNC	16806	YES	-	-	-	CCDS34933.1	ENSP00000429084	O95071	Q49A65,E5RFK7,B3KML2	UPI0000129BCB	-	-	hmmpanther:PTHR11254,hmmpanther:PTHR11254:SF77,Low_complexity_(Seg):seg	-
2266	8	chr8:103307466	UBR5	C	T	0.005556	0	1	89	0.01111	0.01105	1	8:103307466-103307466	C	missense_variant	MODERATE	UBR5	ENSG00000104517	Transcript	ENST00000520539.1	protein_coding	31/59	-	ENST00000520539.1:c.4024A>G	ENSP00000429084.1:p.Met1342Val	4631	4024	1342	M/V	Atg/Gtg	-	-	-1	-	HGNC	16806	YES	-	-	-	CCDS34933.1	ENSP00000429084	O95071	Q49A65,E5RFK7,B3KML2	UPI0000129BCB	deleterious(0.01)	benign(0.267)	hmmpanther:PTHR11254,hmmpanther:PTHR11254:SF77	-
2280	8	chr8:103341456	UBR5	-	T	0.01111	0	2	88	0.02222	0.02198	1	8:103341455-103341456	-	intron_variant	MODIFIER	UBR5	ENSG00000104517	Transcript	ENST00000520539.1	protein_coding	-	10/58	ENST00000520539.1:c.1216-28del	-	-	-	-	-	-	-	-	-1	-	HGNC	16806	YES	-	-	-	CCDS34933.1	ENSP00000429084	O95071	Q49A65,E5RFK7,B3KML2	UPI0000129BCB	-	-	-	-
2281	8	chr8:103354860	UBR5	C	G	0.005556	0	1	89	0.01111	0.01105	1	8:103354860-103354860	C	synonymous_variant	LOW	UBR5	ENSG00000104517	Transcript	ENST00000520539.1	protein_coding	9/59	-	ENST00000520539.1:c.939C>G	ENSP00000429084.1:p.Ser313%3D	1546	939	313	S	tcC/tcG	-	-	-1	-	HGNC	16806	YES	-	-	-	CCDS34933.1	ENSP00000429084	O95071	Q49A65,E5RFK7,B3KML2	UPI0000129BCB	-	-	hmmpanther:PTHR11254,hmmpanther:PTHR11254:SF77,Low_complexity_(Seg):seg	-
4197	23	chrX:41088723	USP9X	T	A	0.008	0	1	34	0.02857	0.02816	1	X:41088723-41088723	T	intron_variant	MODIFIER	USP9X	ENSG00000124486	Transcript	ENST00000324545.8	protein_coding	-	42/44	ENST00000324545.8:c.7218+61A>T	-	-	-	-	-	-	-	-	1	-	HGNC	12632	YES	-	-	-	CCDS43930.1	ENSP00000316357	Q93008	-	UPI00001AF419	-	-	-	-
1083	4	chr4:1961342	WHSC1	T	C	0.005556	0	1	89	0.01111	0.01105	1	4:1961342-1961342	T	stop_gained	HIGH	WHSC1	ENSG00000109685	Transcript	ENST00000382895.3	protein_coding	19/24	-	ENST00000382895.3:c.3130C>T	ENSP00000372351.3:p.Gln1044Ter	3561	3130	1044	Q/*	Cag/Tag	-	-	1	-	HGNC	12766	YES	-	-	-	CCDS33940.1	ENSP00000372351	O96028	D6RIS1,D6RFE7,D6R9V2	UPI0000073F57	-	-	PROSITE_profiles:PS51215,hmmpanther:PTHR22884,hmmpanther:PTHR22884:SF293,Gene3D:2.170.270.10,SMART_domains:SM00570,Superfamily_domains:SSF82199	-
1084	4	chr4:1976481	WHSC1	G	T	0.04444	4	0	86	0	0.08494	1.095e-007	4:1976481-1976481	G	intron_variant	MODIFIER	WHSC1	ENSG00000109685	Transcript	ENST00000382895.3	protein_coding	-	20/23	ENST00000382895.3:c.3373-109T>G	-	-	-	-	-	-	-	-	1	-	HGNC	12766	YES	-	-	-	CCDS33940.1	ENSP00000372351	O96028	D6RIS1,D6RFE7,D6R9V2	UPI0000073F57	-	-	-	-
1085	4	chr4:1976483	WHSC1	G	C	0.03333	3	0	87	0	0.06444	2.705e-006	4:1976483-1976483	G	intron_variant	MODIFIER	WHSC1	ENSG00000109685	Transcript	ENST00000382895.3	protein_coding	-	20/23	ENST00000382895.3:c.3373-107C>G	-	-	-	-	-	-	-	-	1	-	HGNC	12766	YES	-	-	-	CCDS33940.1	ENSP00000372351	O96028	D6RIS1,D6RFE7,D6R9V2	UPI0000073F57	-	-	-	-
1086	4	chr4:1976485	WHSC1	GG	AC	0.005556	0	1	89	0.01111	0.01105	1	4:1976485-1976486	GG	intron_variant	MODIFIER	WHSC1	ENSG00000109685	Transcript	ENST00000382895.3	protein_coding	-	20/23	ENST00000382895.3:c.3373-105_3373-104delinsGG	-	-	-	-	-	-	-	-	1	-	HGNC	12766	YES	-	-	-	CCDS33940.1	ENSP00000372351	O96028	D6RIS1,D6RFE7,D6R9V2	UPI0000073F57	-	-	-	-
1087	4	chr4:1976486	WHSC1	G	C	0.005556	0	1	89	0.01111	0.01105	1	4:1976486-1976486	G	intron_variant	MODIFIER	WHSC1	ENSG00000109685	Transcript	ENST00000382895.3	protein_coding	-	20/23	ENST00000382895.3:c.3373-104C>G	-	-	-	-	-	-	-	-	1	-	HGNC	12766	YES	-	-	-	CCDS33940.1	ENSP00000372351	O96028	D6RIS1,D6RFE7,D6R9V2	UPI0000073F57	-	-	-	-
2140	8	chr8:30938754	WRN	-	T	0.005556	0	1	89	0.01111	0.01105	1	8:30938753-30938754	-	frameshift_variant	HIGH	WRN	ENSG00000165392	Transcript	ENST00000298139.5	protein_coding	9/35	-	ENST00000298139.5:c.1214del	ENSP00000298139.5:p.Leu405TrpfsTer33	1460	1211	404	I/X	aTt/at	-	-	1	-	HGNC	12791	YES	-	-	-	CCDS6082.1	ENSP00000298139	Q14191	-	UPI000013E49D	-	-	Low_complexity_(Seg):seg,hmmpanther:PTHR13710,hmmpanther:PTHR13710:SF80	3
2145	8	chr8:30989869	WRN	C	A	0.005556	0	1	89	0.01111	0.01105	1	8:30989869-30989869	C	intron_variant	MODIFIER	WRN	ENSG00000165392	Transcript	ENST00000298139.5	protein_coding	-	23/34	ENST00000298139.5:c.2826-12A>C	-	-	-	-	-	-	-	-	1	-	HGNC	12791	YES	-	-	-	CCDS6082.1	ENSP00000298139	Q14191	-	UPI000013E49D	-	-	-	-
2152	8	chr8:31004834	WRN	A	T	0.005556	0	1	89	0.01111	0.01105	1	8:31004834-31004834	A	intron_variant	MODIFIER	WRN	ENSG00000165392	Transcript	ENST00000298139.5	protein_coding	-	29/34	ENST00000298139.5:c.3460-46T>A	-	-	-	-	-	-	-	-	1	-	HGNC	12791	YES	-	-	-	CCDS6082.1	ENSP00000298139	Q14191	-	UPI000013E49D	-	-	-	-
2157	8	chr8:31024684	WRN	T	G	0.005556	0	1	89	0.01111	0.01105	1	8:31024684-31024684	T	missense_variant	MODERATE	WRN	ENSG00000165392	Transcript	ENST00000298139.5	protein_coding	34/35	-	ENST00000298139.5:c.4129G>T	ENSP00000298139.5:p.Gly1377Cys	4378	4129	1377	G/C	Ggt/Tgt	-	-	1	-	HGNC	12791	YES	-	-	-	CCDS6082.1	ENSP00000298139	Q14191	-	UPI000013E49D	deleterious(0.02)	benign(0.263)	-	-
2870	12	chr12:6777111	ZNF384	-	C	0.06667	6	0	84	0	0.1244	3.75e-010	12:6777110-6777111	-	frameshift_variant	HIGH	ZNF384	ENSG00000126746	Transcript	ENST00000396801.3	protein_coding	11/11	-	ENST00000396801.3:c.1503del	ENSP00000380019.3:p.Gln501HisfsTer48	1711	1503	501	Q/X	caG/ca	-	-	-1	-	HGNC	11955	YES	-	-	-	CCDS44817.1	ENSP00000380019	Q8TF68	F5H3Z9,F5H105,F5H0D6,F5GYZ1,D3DUR9,B4DQU6,A9X425	UPI00001AE6F8	-	-	Coiled-coils_(Ncoils):Coil,hmmpanther:PTHR11389,hmmpanther:PTHR11389:SF332,Low_complexity_(Seg):seg	-
2873	12	chr12:6788242	ZNF384	C	T	0.005556	0	1	89	0.01111	0.01105	1	12:6788242-6788242	C	synonymous_variant	LOW	ZNF384	ENSG00000126746	Transcript	ENST00000396801.3	protein_coding	4/11	-	ENST00000396801.3:c.174A>G	ENSP00000380019.3:p.Ser58%3D	382	174	58	S	tcA/tcG	-	-	-1	-	HGNC	11955	YES	-	-	-	CCDS44817.1	ENSP00000380019	Q8TF68	F5H3Z9,F5H105,F5H0D6,F5GYZ1,D3DUR9,B4DQU6,A9X425	UPI00001AE6F8	-	-	hmmpanther:PTHR11389,hmmpanther:PTHR11389:SF332	-
	Variants reported in ICGC
[truncated: 55 more columns]
