# Supplementary material for: Identification of Novel Mutations in Colorectal Cancer Patients using Ampliseq Comprehensive Cancer Panel
Source: Preprints.org preprint supplement (doi:10.20944/preprints202104.0401.v1), 2021-04-15
Supplement: Supplementary file 4 [file supplementary › supplementary tables/Supplementary Table S3.XLSX]

## Sheet: VAF
Supplementary Table S3
Gene ID_CRC_Panel	Variant	Max of VAF	Min of VAF	Average of VAF	Count of patients with this variant	Number of patient with VAF 100 or 50	A1	A2	MAF
KDR	chr4:55953747	100	72.7	96.9333	39	24	-	CG	0.03333
FBN3	chr19:8146019	100	99	99.8857	21	21	G	T	0.01111
COL1A1	chr17:48277061	100	10.4	82.3097	31	18	-	CCCCAGGCCCCAGGCCCCAGG	0.01667
PDE4DIP	chr1:144886092	58.3	27.5	47.3414	87	15	T	C	0.3667
ZNF384	chr12:6777111	100	96.5	99.5111	18	15	-	C	0.06667
SMARCB1	chr22:24145672	100	97.8	99.8	14	13	C	-	0.03333
AR	chrX:66943601	100	99.2	99.8692	13	13	-	A	0.088
ARID1A	chr1:27099010	100	100	100	11	11	-	G	0.01111
PDE4DIP	chr1:144930571	58.1	31.1	47.5989	87	10	A	C	0.4222
MLL3	chr7:151879244	100	100	100	10	10	-	T	0.04444
PDE4DIP	chr1:144852315	100	32	65.3462	26	9	T	C	0.04444
TSC2	chr16:2129453	100	96.2	99.5778	9	8	T	-	0.02222
WHSC1	chr4:1976481	100	95.7	99.0182	11	8	G	T	0.04444
WHSC1	chr4:1976483	100	95.7	98.9818	11	7	G	C	0.03333
EP300	chr22:41542838	100	55.8	88	11	6	-	T	0.03333
GREB1	chr2:11751005	100	92	97.8778	9	5	T	G	0.01111
FLT3	chr13:28597449	100	32.4	60.4077	13	4	-	CT	0.02222
LRP1B	chr2:141202026	99.7	96.9	98.6857	7	4	CA	AT	0.07778
ITGB2	chr21:46327067	100	99.6	99.9	4	4	A	-	0.02222
PKHD1	chr6:51921815	100	90	97.22	10	4	GCCTT	-	0.02222
PTPRD	chr9:8460647	100	82.5	94.825	12	4	-	A	0.01111
GATA2	chr3:128202760	99.9	25.6	66.5348	23	3	C	G	0.03889
PDGFRA	chr4:55129894	99.7	99.5	99.6	2	2	G	A	0.02222
KDM6A	chrX:44942869	100	49.6	74.8	2	2	C	T	0.008
ITGA10	chr1:145530939	64.1	28.8	46.9	7	1	T	C	0.02222
ITGA10	chr1:145533894	51	38.4	43.42	5	1	-	C	0.01667
MUC1	chr1:155160052	99.7	98.6	99	3	1	GAC	ACT	0.01111
NTRK1	chr1:156811985	58.2	50.7	54.45	2	1	C	G	0.005556
DDR2	chr1:162737153	99.5	20.9	38.1	54	1	T	A	0.01111
RNF2	chr1:185056670	54.1	40.3	48.1667	3	1	G	T	0.01111
IKBKE	chr1:206647652	50.4	50.4	50.4	1	1	T	A	0.005556
ARID1A	chr1:27097699	99	29.7	55.475	4	1	A	T	0.02222
BLNK	chr10:97975168	91.2	8.8	58.8933	45	1	-	TA	0.03333
EP400	chr12:132562069	100	100	100	1	1	C	A	0.01111
KRAS	chr12:25398279	50.5	0	2.048	25	1	CGC	-	0.005556
ZNF384	chr12:6788242	49.4	49.4	49.4	1	1	C	T	0.005556
NIN	chr14:51221316	99.6	98.9	99.25	2	1	G	C	0.01111
TRIP11	chr14:92454746	53.6	50.7	52.5	3	1	T	-	0.005556
THBS1	chr15:39884882	83.3	30.4	55.3383	47	1	T	G	0.01111
CDH11	chr16:65026991	49.9	49.9	49.9	1	1	G	T	0.005556
BRIP1	chr17:59760648	50.2	50.2	50.2	1	1	C	T	0.005556
PRKAR1A	chr17:66511530	100	100	100	1	1	G	C	0.01111
TP53	chr17:7579634	57	20.6	38.2143	7	1	-	C	0.005556
RNF213	chr17:78357518	49.5	49.5	49.5	1	1	C	-	0.005556
PER1	chr17:8045566	50.8	50.8	50.8	1	1	GC	AA	0.005556
FZR1	chr19:3531825	50.5	50.5	50.5	1	1	G	C	0.005556
LRP1B	chr2:141232924	49.5	49.5	49.5	1	1	C	T	0.005556
LRP1B	chr2:141607906	50.8	50.8	50.8	1	1	T	A	0.005556
SOX11	chr2:5833816	99.5	99.5	99.5	1	1	T	-	0.01111
PTPRT	chr20:40743814	100	100	100	1	1	G	T	0.01111
AURKA	chr20:54959349	50.6	50.6	50.6	1	1	T	-	0.005556
ERG	chr21:39817470	99.7	99.7	99.7	1	1	C	T	0.01111
FANCD2	chr3:10132031	49.2	29.3	39.22	5	1	-	A	0.01111
EPHA3	chr3:89448462	49.5	49.5	49.5	1	1	C	T	0.005556
NFKB1	chr4:103533242	49.8	49.8	49.8	1	1	G	T	0.005556
TET2	chr4:106193885	67.4	46.2	54.7	3	1	-	T	0.005556
PDGFRA	chr4:55129892	99.5	99.5	99.5	1	1	C	T	0.01111
PDGFRB	chr5:149499530	60.3	11.9	29.9033	30	1	T	A	0.1111
IL6ST	chr5:55237596	50.2	48.4	49.3	2	1	A	C	0.005556
IL6ST	chr5:55247262	50.4	50.4	50.4	1	1	-	GAAA	0.005556
SYNE1	chr6:152529254	49.9	49.9	49.9	1	1	A	G	0.005556
DST	chr6:56485091	99.3	96.8	98.05	2	1	-	AAA	0.01111
MLL3	chr7:151902163	100	16	55.7667	12	1	T	A	0.01111
TRRAP	chr7:98543325	50.3	50.3	50.3	1	1	G	A	0.005556
UBR5	chr8:103341456	77.5	49.5	63.7667	3	1	-	T	0.01111
MYC	chr8:128753001	99.7	99.7	99.7	1	1	TGA	-	0.01111
NCOA2	chr8:71128917	49	49	49	1	1	G	A	0.005556
NUP214	chr9:134090676	99	99	99	1	1	G	A	0.01111
PAK3	chrX:110463549	50.9	50.9	50.9	1	1	T	G	0
MTOR	chr1:11167502	24.7	24.7	24.7	1	0	C	A	0.005556
TRIM33	chr1:114940315	28.2	28.2	28.2	1	0	A	G	0.005556
TRIM33	chr1:114976234	46.3	46.3	46.3	1	0	T	C	0.005556
NOTCH2	chr1:120477935	22.2	22.2	22.2	1	0	A	G	0.005556
NOTCH2	chr1:120539655	48.8	48.8	48.8	1	0	C	G	0.005556
PDE4DIP	chr1:144859929	27	22	24.1857	7	0	T	C	0.02778
PDE4DIP	chr1:144863360	39.3	21.2	28.1	6	0	C	T	0.02222
PDE4DIP	chr1:144863366	25.1	25.1	25.1	1	0	A	G	0.005556
PDE4DIP	chr1:144863384	25.2	25.2	25.2	1	0	A	C	0.005556
PDE4DIP	chr1:144863388	25.1	25.1	25.1	1	0	TT	GA	0.005556
PDE4DIP	chr1:144866660	23.9	23.9	23.9	1	0	T	G	0.005556
PDE4DIP	chr1:144866673	27.6	24.1	25.85	2	0	A	G	0.01111
PDE4DIP	chr1:144879054	43.1	15.3	26.3667	9	0	C	T	0.02222
PDE4DIP	chr1:144879086	47.7	47.7	47.7	1	0	-	T	0.005556
PDE4DIP	chr1:144881463	29.2	24.3	26.86	5	0	T	C	0.02778
PDE4DIP	chr1:144881547	27.5	18.7	23.7	11	0	A	G	0.05
PDE4DIP	chr1:144886267	37.2	23.3	27.075	4	0	T	G	0.02222
PDE4DIP	chr1:144923712	35.2	35.2	35.2	1	0	C	T	0.005556
PDE4DIP	chr1:144930977	28.7	25.7	27.125	4	0	C	A	0.01111
PDE4DIP	chr1:144931423	20.6	20.6	20.6	1	0	C	T	0.005556
PDE4DIP	chr1:144994617	46.5	20.9	30.5333	3	0	T	C	0.01667
PDE4DIP	chr1:144994670	29.4	19.5	24.8	9	0	A	C	0.03333
PDE4DIP	chr1:144994694	14.4	14.4	14.4	1	0	C	T	0.005556
ITGA10	chr1:145528319	37.6	37.6	37.6	1	0	T	G	0.005556
ITGA10	chr1:145528348	74.6	54.7	64.65	2	0	A	G	0.005556
BCL9	chr1:147090697	33.8	33.8	33.8	1	0	T	C	0.005556
BCL9	chr1:147094034	21.4	21.4	21.4	1	0	T	A	0.005556
MCL1	chr1:150550722	33	33	33	1	0	G	A	0.005556
ARNT	chr1:150808978	48.6	48.6	48.6	1	0	A	G	0.005556
MUC1	chr1:155160768	29.1	29.1	29.1	1	0	G	A	0.005556
NTRK1	chr1:156841496	25	25	25	1	0	A	G	0.005556
DDR2	chr1:162740326	15	11.6	13.35	6	0	CG	GT	0.01111
DDR2	chr1:162748385	25.5	25.5	25.5	1	0	T	G	0.005556
RNF2	chr1:185067185	45.3	45.3	45.3	1	0	-	T	0.005556
TPR	chr1:186301473	51.9	51.9	51.9	1	0	T	A	0.005556
TPR	chr1:186304551	27	27	27	1	0	G	A	0.005556
TPR	chr1:186315243	16.2	9.9	12.0667	3	0	T	-	0.01111
PTGS2	chr1:186646996	27.5	27.5	27.5	1	0	A	C	0.005556
PTGS2	chr1:186647541	26.2	26.2	26.2	1	0	C	A	0.005556
PAX7	chr1:19018422	51.2	51.2	51.2	1	0	T	C	0.005556
CDC73	chr1:193110968	54.2	54.2	54.2	1	0	G	A	0.005556
CDC73	chr1:193111251	29.2	29.2	29.2	1	0	A	G	0.005556
PIK3C2B	chr1:204438894	41.4	41.4	41.4	1	0	G	A	0.005556
MARK1	chr1:220808683	47.4	44	45.7	2	0	GC	TT	0.01111
MTR	chr1:236966821	55.2	37.4	48.45	6	0	TT	GG	0.02778
MTR	chr1:237016242	30.5	30.5	30.5	1	0	A	C	0.005556
MTR	chr1:237038012	17.8	15.1	16.45	2	0	T	A	0.005556
MTR	chr1:237058719	27.3	27.3	27.3	1	0	G	A	0.005556
AKT3	chr1:243727211	40.2	40.2	40.2	1	0	-	T	0.005556
ARID1A	chr1:27092820	37.3	37.3	37.3	1	0	-	A	0.005556
ARID1A	chr1:27092822	38.8	38.8	38.8	1	0	T	A	0.005556
ARID1A	chr1:27106343	37.6	37.6	37.6	1	0	T	C	0.005556
MYCL1	chr1:40363605	56.5	56.5	56.5	1	0	A	C	0.005556
MPL	chr1:43803502	38.2	38.2	38.2	1	0	T	C	0.005556
MPL	chr1:43818486	46.5	46.5	46.5	1	0	T	C	0.005556
MUTYH	chr1:45799181	92.2	92.2	92.2	1	0	T	G	0.01111
BCL10	chr1:85733370	20.8	20.8	20.8	1	0	C	A	0.005556
BCL10	chr1:85736596	30.7	30.7	30.7	1	0	T	G	0.005556
DPYD	chr1:97564040	26.1	26.1	26.1	1	0	G	T	0.005556
DPYD	chr1:98144767	21.2	21.2	21.2	1	0	T	A	0.005556
DPYD	chr1:98206046	21.8	21.8	21.8	1	0	C	A	0.005556
DPYD	chr1:98386487	31.8	31.8	31.8	1	0	A	C	0.005556
NFKB2	chr10:104156192	25.3	25.3	25.3	1	0	A	C	0.005556
SUFU	chr10:104357022	46	33.9	39.95	2	0	T	C	0.005556
TCF7L2	chr10:114710518	23.3	23.3	23.3	1	0	T	G	0.005556
TCF7L2	chr10:114911539	20	20	20	1	0	T	C	0.005556
FGFR2	chr10:123246886	21.2	21.2	21.2	1	0	C	T	0.005556
MLLT10	chr10:21901248	86	82.3	83.975	4	0	T	-	0.01667
MLLT10	chr10:21901253	17.7	13.5	15.52	5	0	T	G	0.01667
MLLT10	chr10:22022026	25.8	25.8	25.8	1	0	T	A	0.005556
KLF6	chr10:3824270	43.5	43.5	43.5	1	0	C	T	0.005556
NCOA4	chr10:51584910	51.2	40.5	45.85	2	0	A	G	0.01111
NCOA4	chr10:51586458	39.7	39.7	39.7	1	0	ATAT	-	0.005556
TET1	chr10:70332342	23.8	23.8	23.8	1	0	G	A	0.005556
TET1	chr10:70406386	98.8	95.7	97.25	2	0	A	C	0.01111
TET1	chr10:70451510	23.8	23.8	23.8	1	0	A	T	0.005556
KAT6B	chr10:76735416	79.1	12.1	47.6857	21	0	-	T	0.06667
KAT6B	chr10:76736004	20.8	20.8	20.8	1	0	C	T	0.005556
KAT6B	chr10:76744954	85.6	85.6	85.6	1	0	-	A	0.005556
KAT6B	chr10:76744958	14.4	14.4	14.4	1	0	T	A	0.005556
KAT6B	chr10:76744965	20.9	17	19.3333	3	0	G	A	0.01111
CYP2C19	chr10:96541627	46.2	46.2	46.2	1	0	G	A	0.005556
BIRC3	chr11:102195293	38.2	38.2	38.2	1	0	C	A	0.005556
BIRC3	chr11:102195716	21	21	21	1	0	T	G	0.005556
BIRC3	chr11:102201890	33.1	33.1	33.1	1	0	C	T	0.005556
BIRC3	chr11:102207645	62	55	58.5	2	0	A	C	0.01111
BIRC3	chr11:102207653	35.3	35.3	35.3	1	0	C	A	0.005556
GUCY1A2	chr11:106579288	27.1	27.1	27.1	1	0	A	G	0.005556
ATM	chr11:108117897	16	12.5	14.25	2	0	TTA	ATT	0.005556
ATM	chr11:108175596	23	23	23	1	0	G	T	0.005556
ATM	chr11:108201010	25.8	25.8	25.8	1	0	C	T	0.005556
MLL	chr11:118376178	24.8	24.8	24.8	1	0	T	G	0.005556
MLL	chr11:118390491	37.5	37.5	37.5	1	0	A	G	0.005556
CBL	chr11:119145464	78.7	38	64.3	3	0	-	TT	0.005556
NUP98	chr11:3794852	23.6	23.6	23.6	1	0	A	T	0.005556
EXT2	chr11:44228576	59	59	59	1	0	-	A	0.005556
MEN1	chr11:64572073	57.8	57.8	57.8	1	0	A	G	0.005556
MRE11A	chr11:94224026	27.5	27.5	27.5	1	0	G	T	0.005556
MAML2	chr11:95724845	71.2	71.2	71.2	1	0	C	T	0.005556
MAML2	chr11:95826226	23.8	23.8	23.8	1	0	A	G	0.005556
MAML2	chr11:95826390	24.8	24.8	24.8	1	0	A	G	0.005556
PTPN11	chr12:112910806	47.2	32.7	41.525	4	0	A	-	0.005556
EP400	chr12:132466141	18.5	18.5	18.5	1	0	A	G	0.005556
EP400	chr12:132490800	40.1	40.1	40.1	1	0	A	G	0.005556
EP400	chr12:132497625	24.5	24.5	24.5	1	0	T	C	0.005556
EP400	chr12:132529321	51.2	51.2	51.2	1	0	C	A	0.005556
EP400	chr12:132535176	22	22	22	1	0	G	A	0.005556
ADAMTS20	chr12:43846296	22.4	22.4	22.4	1	0	T	G	0.005556
ARID2	chr12:46285667	46.2	46.2	46.2	1	0	C	A	0.005556
MLL2	chr12:49433170	77.6	77.6	77.6	1	0	C	-	0.01111
ERBB3	chr12:56479046	21.2	21.2	21.2	1	0	T	C	0.005556
CDK4	chr12:58143112	46.8	46.8	46.8	1	0	-	AGG	0.005556
IRS2	chr13:110434840	46.9	46.9	46.9	1	0	T	C	0.005556
FOXO1	chr13:41134840	20.8	20.8	20.8	1	0	C	A	0.005556
HSP90AA1	chr14:102548088	26.5	26.5	26.5	1	0	G	T	0.005556
HSP90AA1	chr14:102548797	72	72	72	1	0	C	G	0.005556
NIN	chr14:51225320	68.3	68.3	68.3	1	0	C	T	0.005556
TSHR	chr14:81554286	22	22	22	1	0	C	T	0.005556
TSHR	chr14:81554303	34.8	22.9	28.85	2	0	G	T	0.005556
TSHR	chr14:81606071	20.2	20.2	20.2	1	0	A	G	0.005556
TRIP11	chr14:92461911	32.5	19.3	27.4	3	0	T	A	0.01111
TRIP11	chr14:92471880	20.8	20.8	20.8	1	0	T	C	0.005556
DICER1	chr14:95569893	39.6	39.6	39.6	1	0	A	G	0.005556
CASC5	chr15:40913884	29.7	29.7	29.7	1	0	T	G	0.005556
CASC5	chr15:40949531	20.8	8.2	14.5	2	0	-	TTTT	0.005556
MAP2K1	chr15:66782073	51.1	51.1	51.1	1	0	T	C	0.005556
NTRK3	chr15:88669573	27.3	27.3	27.3	1	0	A	G	0.005556
IDH2	chr15:90628243	28.3	28.3	28.3	1	0	A	C	0.005556
BLM	chr15:91304145	46.3	39.4	42.85	2	0	T	A	0.01111
BLM	chr15:91347493	27.8	27.8	27.8	1	0	A	C	0.005556
IGF1R	chr15:99250742	23.5	23.5	23.5	1	0	C	A	0.005556
IGF1R	chr15:99460151	35.8	35.8	35.8	1	0	T	G	0.005556
MYH11	chr16:15808865	44.7	44.7	44.7	1	0	G	A	0.005556
MYH11	chr16:15826573	38.2	38.2	38.2	1	0	A	G	0.005556
CREBBP	chr16:3843610	44.5	44.5	44.5	1	0	G	T	0.005556
CDH1	chr16:68844081	64.2	64.2	64.2	1	0	T	C	0.005556
FANCA	chr16:89857743	31.6	31.6	31.6	1	0	C	G	0.005556
FANCA	chr16:89877320	23.8	23.8	23.8	1	0	A	C	0.005556
NF1	chr17:29527684	48.5	48.5	48.5	1	0	A	G	0.005556
NF1	chr17:29563074	60	22.2	36.1	8	0	TTG	-	0.01111
NF1	chr17:29684016	21.8	21.8	21.8	1	0	G	T	0.005556
CDK12	chr17:37627782	65.7	32.8	49.25	2	0	G	T	0.005556
ERBB2	chr17:37868327	34.7	34.7	34.7	1	0	A	G	0.005556
ERBB2	chr17:37868741	58.1	58.1	58.1	1	0	C	G	0.005556
ERBB2	chr17:37883680	31	31	31	1	0	T	C	0.005556
RARA	chr17:38504723	25.8	25.8	25.8	1	0	C	T	0.005556
ETV4	chr17:41610590	43.8	43.8	43.8	1	0	G	C	0.005556
ITGB3	chr17:45360865	29.8	29.8	29.8	1	0	A	C	0.005556
ITGB3	chr17:45361773	24.3	24.3	24.3	1	0	T	G	0.005556
ITGB3	chr17:45377857	54.8	34.8	44.8	2	0	C	T	0.005556
ITGB3	chr17:45377881	31.3	31.3	31.3	1	0	A	C	0.005556
NLRP1	chr17:5487204	57.1	40.4	48.75	2	0	A	T	0.005556
BRIP1	chr17:59858190	34.2	34.2	34.2	1	0	T	G	0.005556
BRIP1	chr17:59861596	25.1	25.1	25.1	1	0	A	T	0.005556
BIRC5	chr17:76210389	29	29	29	1	0	A	G	0.005556
BIRC5	chr17:76219645	24.2	11.1	17.9176	17	0	T	C	0.02778
RNF213	chr17:78262057	32.8	32.8	32.8	1	0	T	A	0.005556
RNF213	chr17:78264358	24.8	17.3	20	5	0	G	T	0.005556
RNF213	chr17:78268717	41.5	41.5	41.5	1	0	T	A	0.005556
RNF213	chr17:78319102	41.9	14.3	24.5	5	0	T	C	0.005556
RNF213	chr17:78351613	34.2	20.1	26.2333	6	0	T	A	0.01111
AURKB	chr17:8109871	19	19	19	1	0	C	T	0.005556
CDH2	chr18:25589869	45.8	45.8	45.8	1	0	A	G	0.005556
CDH2	chr18:25593716	26	26	26	1	0	A	C	0.005556
MBD1	chr18:47793930	43.4	22.1	32.8643	14	0	G	A	0.03333
MBD1	chr18:47801260	97.2	97.1	97.15	2	0	C	A	0.01111
SMAD4	chr18:48575204	25.2	25.2	25.2	1	0	T	A	0.005556
SMAD4	chr18:48593440	20.9	20.9	20.9	1	0	C	T	0.005556
DCC	chr18:50451642	37.3	37.3	37.3	1	0	G	T	0.005556
DCC	chr18:50451662	58.1	58.1	58.1	1	0	C	G	0.005556
DCC	chr18:50942526	66.6	66.6	66.6	1	0	T	G	0.005556
DCC	chr18:50976845	34.6	34.6	34.6	1	0	C	A	0.005556
CDH20	chr18:59221876	30.7	11	22.2667	9	0	A	G	0.02778
KEAP1	chr19:10600522	51.4	51.4	51.4	1	0	A	G	0.005556
SMARCA4	chr19:11170500	42	42	42	1	0	T	C	0.005556
TCF3	chr19:1646325	46.8	28.9	37.85	2	0	CGAG	-	0.01111
AKT2	chr19:40741244	34.2	34.2	34.2	1	0	A	G	0.005556
CIC	chr19:42791062	59.5	59.5	59.5	1	0	T	C	0.005556
CIC	chr19:42798455	61.9	61.9	61.9	1	0	G	A	0.005556
MARK4	chr19:45805895	48.4	48.4	48.4	1	0	A	T	0.005556
AURKC	chr19:57744792	21.5	21.5	21.5	1	0	T	C	0.005556
LRP1B	chr2:141079482	26	26	26	1	0	G	T	0.005556
LRP1B	chr2:141214069	51.9	51.9	51.9	1	0	G	C	0.005556
LRP1B	chr2:141299350	26	26	26	1	0	T	C	0.005556
LRP1B	chr2:141598592	30.4	30.4	30.4	1	0	C	A	0.005556
LRP1B	chr2:141680645	29.3	29.3	29.3	1	0	C	A	0.005556
LRP1B	chr2:141819743	30.5	30.5	30.5	1	0	T	C	0.005556
LRP1B	chr2:141986696	56.1	56.1	56.1	1	0	A	G	0.005556
LRP1B	chr2:142004935	24.5	24.5	24.5	1	0	C	A	0.005556
LRP1B	chr2:142888193	21.4	21.4	21.4	1	0	TA	GG	0.005556
ACVR2A	chr2:148672817	22.3	22.3	22.3	1	0	T	G	0.005556
MYCN	chr2:16086048	29.2	29.2	29.2	1	0	A	G	0.005556
NFE2L2	chr2:178096253	21.6	21.6	21.6	1	0	G	A	0.005556
PMS1	chr2:190719333	36.8	36.8	36.8	1	0	C	A	0.005556
PMS1	chr2:190719788	48.7	48.7	48.7	1	0	A	G	0.005556
SF3B1	chr2:198262720	52.5	52.5	52.5	1	0	G	T	0.005556
ERBB4	chr2:212248634	24.4	24.4	24.4	1	0	T	G	0.005556
ERBB4	chr2:212495163	23.8	23.8	23.8	1	0	T	G	0.005556
ERBB4	chr2:212989451	25.8	25.8	25.8	1	0	T	G	0.005556
FN1	chr2:216232553	25.1	25.1	25.1	1	0	G	A	0.005556
FN1	chr2:216237084	51.8	51.8	51.8	1	0	C	G	0.005556
FN1	chr2:216272993	23.8	23.8	23.8	1	0	A	C	0.005556
STK36	chr2:219544800	35.1	35.1	35.1	1	0	T	C	0.005556
DNMT3A	chr2:25457148	31.9	31.9	31.9	1	0	G	T	0.005556
DNMT3A	chr2:25523013	39	39	39	1	0	A	G	0.005556
ALK	chr2:29498305	41.9	41.9	41.9	1	0	-	A	0.005556
MSH2	chr2:47639586	30.8	30.8	30.8	1	0	T	A	0.005556
MSH2	chr2:47641570	30.4	15	20.3714	14	0	G	A	0.005556
MSH2	chr2:47643502	95	23.8	52.6	3	0	C	A	0.02222
MSH2	chr2:47705460	53.2	53.2	53.2	1	0	-	ACTTCT	0.005556
BCL11A	chr2:60773062	28.7	28.7	28.7	1	0	G	A	0.005556
REL	chr2:61147771	87.3	83.8	85.6143	7	0	-	A	0.01111
REL	chr2:61147775	16.2	12.7	14.3857	7	0	G	A	0.01111
TCF7L1	chr2:85534779	11.9	11.9	11.9	1	0	-	GAGG	0.005556
SRC	chr20:36031361	38.8	38.8	38.8	1	0	T	C	0.005556
SRC	chr20:36031767	67.4	23.1	48.5	3	0	G	C	0.01111
GNAS	chr20:57428437	44.9	16.5	35.8742	31	0	G	C	0.1222
SMARCB1	chr22:24167632	37.5	17.8	24.74	25	0	C	T	0.03333
MYH9	chr22:36690119	15.5	15.5	15.5	1	0	CC	GT	0.005556
EP300	chr22:41550944	23.6	16.9	20.25	2	0	A	T	0.005556
CYP2D6	chr22:42524893	21	21	21	1	0	T	C	0.005556
FANCD2	chr3:10088295	30	30	30	1	0	G	A	0.005556
RAF1	chr3:12626400	57.7	57.7	57.7	1	0	T	C	0.005556
RAF1	chr3:12626737	51.1	51.1	51.1	1	0	A	G	0.005556
RAF1	chr3:12641349	67.6	51.7	59.65	2	0	GG	AA	0.005556
EPHB1	chr3:134885838	29.6	29.6	29.6	1	0	T	C	0.005556
PIK3CB	chr3:138461524	44.2	44.2	44.2	1	0	G	A	0.005556
ATR	chr3:142176618	47	47	47	1	0	-	T	0.005556
ATR	chr3:142176649	27.5	27.5	27.5	1	0	A	C	0.005556
ATR	chr3:142186845	37.3	37.3	37.3	1	0	-	T	0.005556
ATR	chr3:142269112	20.4	20.4	20.4	1	0	G	C	0.005556
ATR	chr3:142272647	28.7	19.8	25.175	4	0	A	T	0.01111
ATR	chr3:142274652	25.6	25.6	25.6	1	0	A	C	0.005556
PIK3CA	chr3:178916986	27.6	27.6	27.6	1	0	A	C	0.005556
PIK3CA	chr3:178922273	57.8	53.5	55.65	2	0	AA	CC	0.005556
SOX2	chr3:181430876	35	35	35	1	0	C	T	0.005556
BCL6	chr3:187447019	25.9	25.9	25.9	1	0	A	G	0.005556
CRBN	chr3:3194271	25.3	25.3	25.3	1	0	C	A	0.005556
CRBN	chr3:3197988	45.2	45.2	45.2	1	0	G	C	0.005556
MLH1	chr3:37090047	24.2	24.2	24.2	1	0	A	T	0.005556
ITGA9	chr3:37567515	29.1	29.1	29.1	1	0	C	A	0.005556
ITGA9	chr3:37791907	31.8	31.8	31.8	1	0	A	C	0.005556
CTNNB1	chr3:41267196	23.8	23.8	23.8	1	0	A	C	0.005556
LTF	chr3:46501310	31.1	31.1	31.1	1	0	A	C	0.005556
SETD2	chr3:47155487	23	23	23	1	0	A	G	0.005556
SETD2	chr3:47163994	25.8	25.8	25.8	1	0	G	A	0.005556
PBRM1	chr3:52610602	22.2	22.2	22.2	1	0	C	A	0.005556
PBRM1	chr3:52610619	42.8	42.8	42.8	1	0	G	A	0.005556
MAGI1	chr3:65376926	30.8	30.8	30.8	1	0	T	C	0.005556
MITF	chr3:69985829	47.1	47.1	47.1	1	0	C	T	0.005556
MITF	chr3:70000910	25	25	25	1	0	G	T	0.005556
FOXP1	chr3:71179709	62.5	25.8	44.5333	3	0	C	-	0.005556
EPHA3	chr3:89462276	20	20	20	1	0	C	T	0.005556
EPHA3	chr3:89462294	23.3	23.3	23.3	1	0	C	A	0.005556
NFKB1	chr4:103533291	29	29	29	1	0	A	C	0.005556
NFKB1	chr4:103533656	29.4	29.4	29.4	1	0	A	C	0.005556
NFKB1	chr4:103537741	22	22	22	1	0	T	G	0.005556
TET2	chr4:106158026	45.9	45.9	45.9	1	0	T	A	0.005556
FBXW7	chr4:153244077	29.2	29.2	29.2	1	0	A	C	0.005556
FGFR3	chr4:1803326	47.8	47.8	47.8	1	0	-	C	0.005556
FGFR3	chr4:1807545	30.1	11.6	19.6333	6	0	-	C	0.01111
WHSC1	chr4:1961342	30.7	30.7	30.7	1	0	T	C	0.005556
WHSC1	chr4:1976485	89.2	89.2	89.2	1	0	GG	AC	0.005556
WHSC1	chr4:1976486	10.5	10.5	10.5	1	0	G	C	0.005556
KDR	chr4:55970908	36	36	36	1	0	G	T	0.005556
KDR	chr4:55980293	23.5	23.5	23.5	1	0	A	C	0.005556
KDR	chr4:55981509	47.7	47.7	47.7	1	0	T	-	0.005556
LPHN3	chr4:62599099	20	20	20	1	0	G	A	0.005556
LPHN3	chr4:62897317	25.2	25.2	25.2	1	0	A	C	0.005556
AFF1	chr4:87967279	25.5	25.5	25.5	1	0	C	A	0.005556
AFF1	chr4:87967936	32.6	32.6	32.6	1	0	T	C	0.005556
APC	chr5:112164622	22.2	22.2	22.2	1	0	A	G	0.005556
APC	chr5:112164623	69.1	69.1	69.1	1	0	-	T	0.005556
APC	chr5:112173971	19	19	19	1	0	TA	GT	0.005556
APC	chr5:112175208	29.3	29.3	29.3	1	0	-	A	0.005556
APC	chr5:112175611	61.3	61.3	61.3	1	0	-	ACCACCTCCTCAAACAGCTCAA	0.005556
RAD50	chr5:131924445	24.8	24.8	24.8	1	0	A	C	0.005556
CTNNA1	chr5:138266523	45.5	45.5	45.5	1	0	G	A	0.005556
CTNNA1	chr5:138269717	42	42	42	1	0	-	AGA	0.005556
PDGFRB	chr5:149514424	30.3	30.3	30.3	1	0	A	C	0.005556
FGFR4	chr5:176520463	36.8	36.8	36.8	1	0	A	G	0.005556
NSD1	chr5:176637204	56.4	45.5	50.95	2	0	C	T	0.01111
FLT4	chr5:180035995	47.6	47.6	47.6	1	0	G	C	0.005556
SDHA	chr5:233504	23.1	14.5	18	8	0	C	T	0.01667
LIFR	chr5:38481879	23.5	23.5	23.5	1	0	G	T	0.005556
LIFR	chr5:38486091	32.2	32.2	32.2	1	0	T	A	0.005556
LIFR	chr5:38499715	23.5	23.5	23.5	1	0	A	G	0.005556
LIFR	chr5:38502822	46.4	46.4	46.4	1	0	C	G	0.005556
IL6ST	chr5:55237092	27.6	27.6	27.6	1	0	C	A	0.005556
IL6ST	chr5:55256341	23.6	23.6	23.6	1	0	T	C	0.005556
IL6ST	chr5:55264283	29	29	29	1	0	G	T	0.005556
PIK3R1	chr5:67522726	26.8	26.8	26.8	1	0	T	G	0.005556
PIK3R1	chr5:67590496	41.2	41.2	41.2	1	0	T	G	0.005556
FOXO3	chr6:108985258	21.4	21.4	21.4	1	0	G	A	0.005556
ROS1	chr6:117710658	28.3	28.3	28.3	1	0	G	T	0.005556
SGK1	chr6:134498787	32.2	32.2	32.2	1	0	T	C	0.005556
SGK1	chr6:134528524	51.7	51.7	51.7	1	0	A	G	0.005556
SYNE1	chr6:152457915	48.2	48.2	48.2	1	0	T	G	0.005556
SYNE1	chr6:152470784	25	25	25	1	0	T	G	0.005556
SYNE1	chr6:152472812	51.5	40.8	46.15	2	0	C	T	0.005556
SYNE1	chr6:152542688	27	27	27	1	0	C	G	0.005556
SYNE1	chr6:152631545	23.8	23.8	23.8	1	0	A	G	0.005556
SYNE1	chr6:152631970	35.2	35.2	35.2	1	0	A	C	0.005556
SYNE1	chr6:152639288	26.8	26.8	26.8	1	0	A	C	0.005556
SYNE1	chr6:152644654	19.3	19.3	19.3	1	0	A	C	0.005556
SYNE1	chr6:152652197	23.5	23.5	23.5	1	0	C	A	0.005556
SYNE1	chr6:152674791	22.1	22.1	22.1	1	0	C	T	0.005556
SYNE1	chr6:152712677	27.3	27.3	27.3	1	0	A	C	0.005556
SYNE1	chr6:152823897	24	24	24	1	0	T	A	0.005556
IGF2R	chr6:160412166	37	16.7	21.5636	11	0	T	A	0.01111
IGF2R	chr6:160491086	34.5	34.5	34.5	1	0	G	A	0.005556
RPS6KA2	chr6:166952128	31.5	28.1	29.8	2	0	T	C	0.005556
NOTCH4	chr6:32166734	56.4	56.4	56.4	1	0	A	G	0.005556
IRF4	chr6:397155	33.2	33.2	33.2	1	0	T	C	0.005556
FOXP4	chr6:41559050	27	27	27	1	0	T	C	0.005556
PKHD1	chr6:51524653	21	21	21	1	0	T	A	0.005556
PKHD1	chr6:51613058	34.1	34.1	34.1	1	0	T	G	0.005556
PKHD1	chr6:51889459	51.9	51.9	51.9	1	0	A	T	0.005556
PKHD1	chr6:51890498	29.5	29.5	29.5	1	0	A	C	0.005556
PKHD1	chr6:51923126	23.9	23.9	23.9	1	0	T	C	0.005556
DST	chr6:56341107	41	11.7	23.2122	41	0	A	T	0.08889
DST	chr6:56347533	24.3	24.3	24.3	1	0	C	A	0.005556
DST	chr6:56350158	21.5	21.5	21.5	1	0	C	A	0.005556
DST	chr6:56417148	68.2	28.2	48.2	2	0	G	T	0.005556
DST	chr6:56417448	71.5	71.5	71.5	1	0	C	A	0.005556
DST	chr6:56485266	22.9	22.9	22.9	1	0	C	G	0.005556
DST	chr6:56489467	45.8	45.8	45.8	1	0	-	TTACTC	0.005556
BAI3	chr6:69349192	29	29	29	1	0	A	G	0.005556
BAI3	chr6:70071243	34.8	34.8	34.8	1	0	G	A	0.005556
EPHA7	chr6:93968004	97.3	83.3	88.7933	15	0	C	T	0.05556
EPHA7	chr6:93973530	27.8	27.8	27.8	1	0	G	T	0.005556
EPHA7	chr6:94128960	29.3	29.3	29.3	1	0	C	T	0.005556
PIK3CG	chr7:106545513	25.6	25.6	25.6	1	0	G	A	0.005556
MET	chr7:116339867	26	26	26	1	0	G	T	0.005556
MET	chr7:116397717	38.3	21.2	29.4545	11	0	G	C	0.06111
POT1	chr7:124475481	45.2	45.2	45.2	1	0	G	T	0.005556
ETV1	chr7:13950941	29	29	29	1	0	T	G	0.005556
EZH2	chr7:148523504	31.6	23.5	28.6333	3	0	A	T	0.01667
MLL3	chr7:151859655	23.9	23.9	23.9	1	0	A	G	0.005556
MLL3	chr7:151902164	30.4	13.8	21.37	10	0	T	A	0.005556
MLL3	chr7:151902167	85.5	15.6	47.15	12	0	-	TT	0.005556
MLL3	chr7:151947941	40.9	40.9	40.9	1	0	T	C	0.005556
MLL3	chr7:151971024	14.8	14.8	14.8	1	0	A	G	0.005556
CARD11	chr7:2968269	23	23	23	1	0	C	T	0.005556
PMS2	chr7:6027040	42.2	42.2	42.2	1	0	C	A	0.005556
PMS2	chr7:6029511	30.7	22.2	25.5333	3	0	T	A	0.01111
PMS2	chr7:6035156	35	35	35	1	0	G	T	0.005556
AKAP9	chr7:91631234	52.1	52.1	52.1	1	0	C	A	0.005556
AKAP9	chr7:91641671	10.2	10.2	10.2	1	0	TGC	CAA	0.005556
AKAP9	chr7:91670064	51.4	51.4	51.4	1	0	C	T	0.005556
AKAP9	chr7:91672096	28	28	28	1	0	G	T	0.005556
AKAP9	chr7:91699372	43.8	43.8	43.8	1	0	A	-	0.005556
AKAP9	chr7:91709156	25.2	25.2	25.2	1	0	G	T	0.005556
AKAP9	chr7:91712728	56.8	56.8	56.8	1	0	A	C	0.005556
TRRAP	chr7:98552756	21.9	21.9	21.9	1	0	C	A	0.005556
TRRAP	chr7:98552760	28.2	28.2	28.2	1	0	T	C	0.005556
TRRAP	chr7:98552779	27.3	27.3	27.3	1	0	T	C	0.005556
TRRAP	chr7:98579357	26.5	26.5	26.5	1	0	T	C	0.005556
UBR5	chr8:103284936	20.1	20.1	20.1	1	0	T	C	0.005556
UBR5	chr8:103289351	22.9	22.9	22.9	1	0	C	T	0.005556
UBR5	chr8:103297404	23	23	23	1	0	G	T	0.005556
UBR5	chr8:103307466	51.5	51.5	51.5	1	0	C	T	0.005556
UBR5	chr8:103354860	48.1	48.1	48.1	1	0	C	G	0.005556
CSMD3	chr8:113254080	11.6	9.4	10.5	2	0	-	CACACACG	0.01111
CSMD3	chr8:113301795	11.8	11.8	11.8	1	0	TTA	ATT	0.005556
CSMD3	chr8:113323397	23.9	23.9	23.9	1	0	G	T	0.005556
CSMD3	chr8:113516216	39.2	30.8	33.7	3	0	G	A	0.01667
CSMD3	chr8:113568949	22.4	22.4	22.4	1	0	G	T	0.005556
EXT1	chr8:118825146	59.6	59.6	59.6	1	0	A	T	0.005556
EXT1	chr8:119122431	66	66	66	1	0	A	G	0.005556
MYC	chr8:128753260	42.2	42.2	42.2	1	0	T	G	0.005556
RECQL4	chr8:145737307	70.7	70.7	70.7	1	0	A	G	0.005556
WRN	chr8:30938754	67.4	65	66.2	2	0	-	T	0.005556
WRN	chr8:30989869	27.4	27.4	27.4	1	0	C	A	0.005556
WRN	chr8:31004834	43.4	43.4	43.4	1	0	A	T	0.005556
WRN	chr8:31024684	73.8	47.5	60.65	2	0	T	G	0.005556
GPR124	chr8:37691418	41.4	41.4	41.4	1	0	A	C	0.005556
FGFR1	chr8:38272357	41.4	16.6	27.3833	12	0	A	T	0.04444
KAT6A	chr8:41791041	97.4	97.4	97.4	1	0	A	-	0.01111
IKBKB	chr8:42175297	28.1	28.1	28.1	1	0	C	T	0.005556
HOOK3	chr8:42868456	9.1	9.1	9.1	1	0	-	TTTTTT	0.005556
PRKDC	chr8:48686929	24.8	24.8	24.8	1	0	C	T	0.005556
PRKDC	chr8:48736499	40.9	40.9	40.9	1	0	G	C	0.005556
PRKDC	chr8:48776046	23.5	23.5	23.5	1	0	G	A	0.005556
PRKDC	chr8:48825021	20.2	20.2	20.2	1	0	C	G	0.005556
PRKDC	chr8:48828031	44.7	32.6	38.65	2	0	C	A	0.005556
NCOA2	chr8:71041018	25.8	25.8	25.8	1	0	A	C	0.005556
NCOA2	chr8:71041202	40.8	40.8	40.8	1	0	C	T	0.005556
NCOA2	chr8:71075661	56.2	56.2	56.2	1	0	G	A	0.005556
NCOA2	chr8:71075779	93.2	93.2	93.2	1	0	C	G	0.01111
RUNX1T1	chr8:92972668	97.2	97.2	97.2	1	0	C	G	0.01111
RUNX1T1	chr8:93026955	53.4	53.4	53.4	1	0	A	G	0.005556
RUNX1T1	chr8:93029480	35.5	35.5	35.5	1	0	A	C	0.005556
RALGDS	chr9:135981338	27	27	27	1	0	T	C	0.005556
CDKN2A	chr9:21994158	52	52	52	1	0	C	T	0.005556
TAF1L	chr9:32631748	23.3	23.3	23.3	1	0	A	G	0.005556
PAX5	chr9:37006542	21.2	21.2	21.2	1	0	A	C	0.005556
JAK2	chr9:5081778	89.7	89.7	89.7	1	0	TA	CT	0.01111
JAK2	chr9:5090443	31.8	31.8	31.8	1	0	G	A	0.005556
PTPRD	chr9:8485904	25.2	25.2	25.2	1	0	T	A	0.005556
PTPRD	chr9:8485984	26.3	26.3	26.3	1	0	T	C	0.005556
SYK	chr9:93606313	26.5	26.5	26.5	1	0	A	C	0.005556
PTCH1	chr9:98212211	32.3	32.3	32.3	1	0	T	G	0.005556
PTCH1	chr9:98241253	32.5	32.5	32.5	1	0	C	T	0.005556
USP9X	chrX:41088723	30.6	26.7	28.5667	3	0	T	A	0.008
TFE3	chrX:48896874	33.5	33.5	33.5	1	0	T	C	0.008
KDM5C	chrX:53245059	24.5	19.2	21.85	2	0	T	C	0
FAM123B	chrX:63411640	10.9	10.9	10.9	1	0	ATAGAACTCAT	-	0.008
TAF1	chrX:70597573	63.4	63.4	63.4	1	0	C	G	0.008
TAF1	chrX:70683793	44.9	44.9	44.9	1	0	T	C	0
ATRX	chrX:76849165	33.4	33.4	33.4	1	0	T	C	0.008
TBX22	chrX:79279609	48.2	48.2	48.2	1	0	C	G	0.008
LIFR	chr5:38482324	0	0	0	0	0	T	G	0.005556
NOTCH4	chr6:32164107	0	0	0	0	0	A	G	0.005556

## Sheet: Column defintion
Gene ID_CRC_Panel	Gene name
Variant	Variant name
Max of VAF	maximum observed Variant Allele Fraction in all samples
Min of VAF	Minimum observed Variant Allele Fraction in all samples
Average of VAF	average observed Variant Allele Fraction in all samples
Count of patients with this variant	Count of samples with the observed variants
Number of patient with VAF 100 or 50	Counts of samples with exaclty VAF between 49-51 or 99-100
A1	Allele 1
A2	Allele 2
MAF	Minor allele frequency as observed in our final cohort
