# Supplementary material for: Identification of Novel Mutations in Colorectal Cancer Patients using Ampliseq Comprehensive Cancer Panel
Source: Preprints.org preprint supplement (doi:10.20944/preprints202104.0401.v1), 2021-04-15
Supplement: Supplementary file 4 [file supplementary › supplementary tables/Supplementary Table S4.xlsx]

## Sheet: Sheet1
Supplememtary Table S2						Supplementary Table S4
SNP	Gene ID_CRC_Panel	A1	A2	MAF	Consequence	IMPACT	SYMBOL	Existing_variation	Novel	SIFT	PolyPhen	large_intestine_pathogenic	pathogenic	large_intestine_somatic	Somatic	LI_Pathogenic	Pathogenic	LI_Somatic	Somatic
chr17:7576851	TP53	G	A	0.005556	splice_donor_variant	HIGH	TP53	TP53_g.14067T>C,COSM146229,COSM1630409,COSM1646824,COSM29774,COSM4170831,COSM4170832,COSM45552,COSM4782216,COSM4782217,COSM4859709,COSM707067,COSM707068	0	-	-	PATHOGENIC	PATHOGENIC	Confirmed somatic variant	Confirmed somatic variant	1	1	1	1
chr17:7574035	TP53	C	T	0.005556	splice_acceptor_variant	HIGH	TP53	rs867389695,COSM1610826,COSM318155,COSM3970337,COSM3970338,COSM43791,COSM87027	0	-	-	PATHOGENIC	PATHOGENIC	Confirmed somatic variant	Confirmed somatic variant	1	1	1	1
chr3:178916924	PIK3CA	T	C	0.005556	missense_variant	MODERATE	PIK3CA	rs863225060,COSM1484857,COSM163485,COSM5026082,COSM747	0	deleterious(0.01)	probably_damaging(0.951)	PATHOGENIC	PATHOGENIC	Confirmed somatic variant	Confirmed somatic variant	1	1	1	1
chr5:112151204	APC	T	C	0.005556	stop_gained	HIGH	APC	rs786201856,CM920030,COSM19679	0	-	-	PATHOGENIC	PATHOGENIC	Confirmed somatic variant	Confirmed somatic variant	1	1	1	1
chr6:134491471	SGK1	T	C	0.005556	missense_variant	MODERATE	SGK1	rs780541198,COSM6776634,COSM6776635,COSM6776636,COSM6776637,COSM6776638	0	tolerated(0.19)	benign(0.052)	PATHOGENIC	PATHOGENIC	Confirmed somatic variant	Confirmed somatic variant	1	1	1	1
chr5:112102978	APC	G	A	0.005556	missense_variant	MODERATE	APC	rs776242276,COSM6019369	0	tolerated(0.73)	benign(0.006)	PATHOGENIC	PATHOGENIC	Confirmed somatic variant	Confirmed somatic variant	1	1	1	1
chr10:70432654	TET1	A	G	0.005556	missense_variant,splice_region_variant	MODERATE	TET1	rs776044335,COSM6417022,COSM6978345	0	deleterious(0)	possibly_damaging(0.554)	PATHOGENIC	PATHOGENIC	Confirmed somatic variant	Confirmed somatic variant	1	1	1	1
chr15:99250839	IGF1R	A	G	0.005556	missense_variant	MODERATE	IGF1R	rs774734018,COSM4444516	0	deleterious(0.01)	benign(0.311)	PATHOGENIC	PATHOGENIC	Confirmed somatic variant	Confirmed somatic variant	1	1	1	1
chr17:37880988	ERBB2	A	G	0.005556	missense_variant	MODERATE	ERBB2	rs772054394,COSM5731177,COSM5731178	0	deleterious(0)	probably_damaging(0.999)	PATHOGENIC	PATHOGENIC	Confirmed somatic variant	Confirmed somatic variant	1	1	1	1
chr11:108216568	ATM	A	C	0.005556	missense_variant	MODERATE	ATM	rs767845728,COSM200681,COSM5009208	0	deleterious(0)	probably_damaging(0.988)	PATHOGENIC	PATHOGENIC	Confirmed somatic variant	Confirmed somatic variant	1	1	1	1
chr2:178095644	NFE2L2	T	C	0.005556	missense_variant	MODERATE	NFE2L2	rs763240080,COSM1401474	0	deleterious(0.01)	probably_damaging(0.918)	PATHOGENIC	PATHOGENIC	Confirmed somatic variant	Confirmed somatic variant	1	1	1	1
chr1:45798440	MUTYH	A	G	0.005556	missense_variant	MODERATE	MUTYH	rs761101420,COSM4704185	0	deleterious(0)	probably_damaging(0.97)	PATHOGENIC	PATHOGENIC	Confirmed somatic variant	Confirmed somatic variant	1	1	1	1
chr10:88676945	BMPR1A	T	C	0.005556	stop_gained	HIGH	BMPR1A	rs759363072,COSM6954486,COSM6954487	0	-	-	PATHOGENIC	PATHOGENIC	Confirmed somatic variant	Confirmed somatic variant	1	1	1	1
chr19:45858976	ERCC2	T	C	0.005556	missense_variant	MODERATE	ERCC2	rs757432268,COSM5097318	0	deleterious(0.01)	benign(0.031)	PATHOGENIC	PATHOGENIC	Confirmed somatic variant	Confirmed somatic variant	1	1	1	1
chr1:162740264	DDR2	A	G	0.005556	missense_variant	MODERATE	DDR2	rs756149068,COSM6952102,COSM6952103,COSM6952104,COSM7126313,COSM7126314,COSM7126315	0	tolerated(0.22)	benign(0.062)	PATHOGENIC	PATHOGENIC	Confirmed somatic variant	Confirmed somatic variant	1	1	1	1
chr14:95595941	DICER1	T	C	0.005556	missense_variant	MODERATE	DICER1	rs749484792,COSM1238673	0	tolerated(0.1)	possibly_damaging(0.575)	PATHOGENIC	PATHOGENIC	Confirmed somatic variant	Confirmed somatic variant	1	1	1	1
chr2:212570063	ERBB4	T	C	0.005556	missense_variant	MODERATE	ERBB4	rs746784831,COSM6954470,COSM6954471	0	tolerated(0.16)	benign(0.01)	PATHOGENIC	PATHOGENIC	Confirmed somatic variant	Confirmed somatic variant	1	1	1	1
chr1:226552729	PARP1	A	G	0.005556	missense_variant	MODERATE	PARP1	rs746139482,COSM3385796	0	deleterious(0)	probably_damaging(0.969)	PATHOGENIC	PATHOGENIC	Confirmed somatic variant	Confirmed somatic variant	1	1	1	1
chr2:141707868	LRP1B	T	G	0.09444	synonymous_variant	LOW	LRP1B	rs6748626,COSM3757654	0	-	-	PATHOGENIC	PATHOGENIC	Confirmed somatic variant	Confirmed somatic variant	1	1	1	1
chr4:55599268	KIT	T	C	0.02222	synonymous_variant	LOW	KIT	rs55789615,COSM1307	0	-	-	PATHOGENIC	PATHOGENIC	Confirmed somatic variant	Confirmed somatic variant	1	1	1	1
chr13:28979994	FLT1	A	G	0.01667	synonymous_variant	LOW	FLT1	rs55675306,COSM269183	0	-	-	PATHOGENIC	PATHOGENIC	Confirmed somatic variant	Confirmed somatic variant	1	1	1	1
chr16:3788618	CREBBP	A	G	0.005556	missense_variant	MODERATE	CREBBP	rs398124146,COSM254625,COSM6977043,COSM88749	0	deleterious(0)	probably_damaging(0.999)	PATHOGENIC	PATHOGENIC	Confirmed somatic variant	Confirmed somatic variant	1	1	1	1
chr18:48591919	SMAD4	A	G	0.005556	missense_variant	MODERATE	SMAD4	rs377767347,CM004254,CM100519,COSM14122,COSM4072505,COSM6937457	0	deleterious(0.03)	probably_damaging(0.999)	PATHOGENIC	PATHOGENIC	Confirmed somatic variant	Confirmed somatic variant	1	1	1	1
chr17:48273335	COL1A1	T	A	0.02222	splice_region_variant,synonymous_variant	LOW	COL1A1	rs375914028,COSM4673645	0	-	-	PATHOGENIC	PATHOGENIC	Confirmed somatic variant	Confirmed somatic variant	1	1	1	1
chr14:81609692	TSHR	A	G	0.02778	synonymous_variant	LOW	TSHR	rs375393735,COSM5473580	0	-	-	PATHOGENIC	PATHOGENIC	Confirmed somatic variant	Confirmed somatic variant	1	1	1	1
chr2:209108311	IDH1	C	T	0.005556	missense_variant	MODERATE	IDH1	rs374474539,COSM4691739	0	deleterious_low_confidence(0.01)	benign(0.086)	PATHOGENIC	PATHOGENIC	Confirmed somatic variant	Confirmed somatic variant	1	1	1	1
chr3:134880871	EPHB1	A	G	0.005556	synonymous_variant	LOW	EPHB1	rs373658195,COSM6975480,COSM6975481	0	-	-	PATHOGENIC	PATHOGENIC	Confirmed somatic variant	Confirmed somatic variant	1	1	1	1
chr1:162743362	DDR2	A	G	0.005556	missense_variant	MODERATE	DDR2	rs372362070,COSM6935160	0	deleterious(0)	probably_damaging(0.999)	PATHOGENIC	PATHOGENIC	Confirmed somatic variant	Confirmed somatic variant	1	1	1	1
chrX:44969370	KDM6A	A	G	0.024	missense_variant	MODERATE	KDM6A	rs370765411,COSM6952413,COSM6952414,COSM6952415	0	tolerated(0.57)	benign(0.001)	PATHOGENIC	PATHOGENIC	Confirmed somatic variant	Confirmed somatic variant	1	1	1	1
chr6:152706918	SYNE1	A	G	0.005556	missense_variant	MODERATE	SYNE1	rs368832347,COSM1137455,COSM277555,COSM277556,COSM3662227,COSM3662228	0	-	probably_damaging(0.922)	PATHOGENIC	PATHOGENIC	Confirmed somatic variant	Confirmed somatic variant	1	1	1	1
chr9:8485834	PTPRD	A	G	0.03333	missense_variant	MODERATE	PTPRD	rs35929428,CM136299,COSM3764024,COSM3764025	0	tolerated(0.15)	benign(0)	PATHOGENIC	PATHOGENIC	Confirmed somatic variant	Confirmed somatic variant	1	1	1	1
chr4:1807478	FGFR3	T	G	0.02778	splice_region_variant,synonymous_variant	LOW	FGFR3	rs3135897,COSM4158930,COSM4158931	0	-	-	PATHOGENIC	PATHOGENIC	Confirmed somatic variant	Confirmed somatic variant	1	1	1	1
chr17:7577548	TP53	T	C	0.01111	missense_variant	MODERATE	TP53	rs28934575,CM010463,CM900210,CM920674,TP53_g.13370G>A,COSM10957,COSM11081,COSM121035,COSM121036,COSM121037,COSM1610835,COSM1610836,COSM1610837,COSM1640833,COSM1646855,COSM3356965,COSM3388190,COSM3717639,COSM3717640,COSM3726870,COSM3726871,COSM3726872,COSM3726873,COSM3726874,COSM44642,COSM562651,COSM562652,COSM562653,COSM6932	0	deleterious(0)	probably_damaging(0.998)	PATHOGENIC	PATHOGENIC	Confirmed somatic variant	Confirmed somatic variant	1	1	1	1
chr12:121435427	HNF1A	A	G	0.03333	missense_variant	MODERATE	HNF1A	rs2464196,CM067474,COSM4984989	0	tolerated(0.22)	benign(0.003)	PATHOGENIC	PATHOGENIC	Confirmed somatic variant	Confirmed somatic variant	1	1	1	1
chr3:128204951	GATA2	T	C	0.02778	missense_variant	MODERATE	GATA2	rs2335052,CM066570,COSM445531	0	tolerated(0.53)	benign(0.001)	PATHOGENIC	PATHOGENIC	Confirmed somatic variant	Confirmed somatic variant	1	1	1	1
chr7:148525904	EZH2	G	C	0.06111	missense_variant	MODERATE	EZH2	rs2302427,COSM3762469	0	deleterious(0.01)	possibly_damaging(0.603)	PATHOGENIC	PATHOGENIC	Confirmed somatic variant	Confirmed somatic variant	1	1	1	1
chr7:55268916	EGFR	T	C	0.05556	synonymous_variant	LOW	EGFR	rs2293347,COSM3762773	0	-	-	PATHOGENIC	PATHOGENIC	Confirmed somatic variant	Confirmed somatic variant	1	1	1	1
chr9:93640009	SYK	A	G	0.05556	synonymous_variant	LOW	SYK	rs2290887,COSM3764052,COSM3764053	0	-	-	PATHOGENIC	PATHOGENIC	Confirmed somatic variant	Confirmed somatic variant	1	1	1	1
chr1:204433727	PIK3C2B	T	C	0.005556	missense_variant	MODERATE	PIK3C2B	rs2271416,COSM2214400,COSM262931	0	deleterious(0)	probably_damaging(0.968)	PATHOGENIC	PATHOGENIC	Confirmed somatic variant	Confirmed somatic variant	1	1	1	1
chr12:121435342	HNF1A	T	C	0.1111	synonymous_variant	LOW	HNF1A	rs2259820,COSM3931546	0	-	-	PATHOGENIC	PATHOGENIC	Confirmed somatic variant	Confirmed somatic variant	1	1	1	1
chr9:98211572	PTCH1	A	T	0.005556	missense_variant	MODERATE	PTCH1	rs2236405,CM032347,COSM1463812,COSM1463813,COSM1463814,COSM17511	0	tolerated(0.15)	benign(0.079)	PATHOGENIC	PATHOGENIC	Confirmed somatic variant	Confirmed somatic variant	1	1	1	1
chr5:112162854	APC	T	C	0.45	synonymous_variant	LOW	APC	rs2229992,CM990152,COSM1432175	0	-	-	PATHOGENIC	PATHOGENIC	Confirmed somatic variant	Confirmed somatic variant	1	1	1	1
chr4:55152040	PDGFRA	T	C	0.03889	synonymous_variant	LOW	PDGFRA	rs2228230,COSM22413	0	-	-	PATHOGENIC	PATHOGENIC	Confirmed somatic variant	Confirmed somatic variant	1	1	1	1
chr3:142222284	ATR	G	A	0.2889	synonymous_variant	LOW	ATR	rs2227931,COSM4002479	0	-	-	PATHOGENIC	PATHOGENIC	Confirmed somatic variant	Confirmed somatic variant	1	1	1	1
chr7:55214348	EGFR	T	C	0.2556	synonymous_variant	LOW	EGFR	rs2072454,COSM42978	0	-	-	PATHOGENIC	PATHOGENIC	Confirmed somatic variant	Confirmed somatic variant	1	1	1	1
chr22:41548008	EP300	G	A	0.04444	missense_variant	MODERATE	EP300	rs20551,COSM5009621	0	tolerated(0.31)	benign(0)	PATHOGENIC	PATHOGENIC	Confirmed somatic variant	Confirmed somatic variant	1	1	1	1
chr3:69928509	MITF	T	C	0.005556	missense_variant	MODERATE	MITF	rs190215588,COSM2784726,COSM2784727,COSM480562,COSM5344534,COSM5344535,COSM5344536	0	tolerated(0.22)	benign(0.04)	PATHOGENIC	PATHOGENIC	Confirmed somatic variant	Confirmed somatic variant	1	1	1	1
chr7:6043355	PMS2	A	G	0.005556	missense_variant	MODERATE	PMS2	rs188006077,COSM3639952	0	deleterious(0)	probably_damaging(1)	PATHOGENIC	PATHOGENIC	Confirmed somatic variant	Confirmed somatic variant	1	1	1	1
chr11:108175463	ATM	T	A	0.005556	missense_variant	MODERATE	ATM	rs1801673,CM083593,COSM21628	0	deleterious(0)	benign(0.423)	PATHOGENIC	PATHOGENIC	Confirmed somatic variant	Confirmed somatic variant	1	1	1	1
chr11:108175462	ATM	A	G	0.05556	missense_variant	MODERATE	ATM	rs1801516,CM077896,COSM41596	0	tolerated(0.08)	benign(0.015)	PATHOGENIC	PATHOGENIC	Confirmed somatic variant	Confirmed somatic variant	1	1	1	1
chr3:37053568	MLH1	G	A	0.09444	missense_variant	MODERATE	MLH1	rs1799977,CM970958,COSM1131469	0	tolerated(0.33)	benign(0.06)	PATHOGENIC	PATHOGENIC	Confirmed somatic variant	Confirmed somatic variant	1	1	1	1
chr19:11101993	SMARCA4	A	G	0.01667	synonymous_variant	LOW	SMARCA4	rs17001073,COSM3756290	0	-	-	PATHOGENIC	PATHOGENIC	Confirmed somatic variant	Confirmed somatic variant	1	1	1	1
chrX:44970644	KDM6A	T	C	0.008	synonymous_variant	LOW	KDM6A	rs150722375,COSM5367064,COSM5367065,COSM5367066	0	-	-	PATHOGENIC	PATHOGENIC	Confirmed somatic variant	Confirmed somatic variant	1	1	1	1
chr8:103357685	UBR5	T	A	0.02222	synonymous_variant	LOW	UBR5	rs149428571,COSM6050101	0	-	-	PATHOGENIC	PATHOGENIC	Confirmed somatic variant	Confirmed somatic variant	1	1	1	1
chr6:152510429	SYNE1	A	G	0.005556	synonymous_variant	LOW	SYNE1	rs139590550,COSM1441279,COSM1441280,COSM1441281	0	-	-	PATHOGENIC	PATHOGENIC	Confirmed somatic variant	Confirmed somatic variant	1	1	1	1
chr5:112162891	APC	T	C	0.005556	stop_gained	HIGH	APC	rs137854580,CM930023,COSM29364	0	-	-	PATHOGENIC	PATHOGENIC	Confirmed somatic variant	Confirmed somatic variant	1	1	1	1
chr5:112164616	APC	T	C	0.005556	stop_gained	HIGH	APC	rs137854574,CM920035,COSM18848	0	-	-	PATHOGENIC	PATHOGENIC	Confirmed somatic variant	Confirmed somatic variant	1	1	1	1
chr5:112154969	APC	A	C	0.005556	missense_variant	MODERATE	APC	rs137854567,CM910030,CS106545,COSM6922916	0	deleterious(0)	possibly_damaging(0.714)	PATHOGENIC	PATHOGENIC	Confirmed somatic variant	Confirmed somatic variant	1	1	1	1
chr20:57484421	GNAS	A	G	0.005556	missense_variant	MODERATE	GNAS	rs121913495,COSM27895,COSM308279,COSM94388,COSM99221	0	deleterious(0.01)	probably_damaging(1)	PATHOGENIC	PATHOGENIC	Confirmed somatic variant	Confirmed somatic variant	1	1	1	1
chr17:37881000	ERBB2	T	G	0.01111	missense_variant	MODERATE	ERBB2	rs121913471,COSM14062,COSM14064,COSM436500,COSM5028283,COSM5120702,COSM6941992	0	deleterious(0.05)	benign(0.036)	PATHOGENIC	PATHOGENIC	Confirmed somatic variant	Confirmed somatic variant	1	1	1	1
chr7:140481411	BRAF	T	C	0.005556	missense_variant	MODERATE	BRAF	rs121913351,CM115083,COSM451,COSM452,COSM453	0	deleterious(0)	probably_damaging(0.98)	PATHOGENIC	PATHOGENIC	Confirmed somatic variant	Confirmed somatic variant	1	1	1	1
chr17:7577121	TP53	A	G	0.005556	missense_variant	MODERATE	TP53	rs121913343,CM010471,CM010473,CM951233,TP53_g.13797C>T,COSM10659,COSM1645518,COSM3355991,COSM3719990,COSM3719991,COSM3719992,COSM3958801,COSM3958802,COSM417971,COSM43843,COSM43909,COSM44701,COSM99933	0	deleterious(0)	probably_damaging(0.999)	PATHOGENIC	PATHOGENIC	Confirmed somatic variant	Confirmed somatic variant	1	1	1	1
chr5:112173917	APC	T	C	0.005556	stop_gained	HIGH	APC	rs121913333,CM942020,COSM18852	0	-	-	PATHOGENIC	PATHOGENIC	Confirmed somatic variant	Confirmed somatic variant	1	1	1	1
chr5:112175639	APC	T	C	0.02778	stop_gained	HIGH	APC	rs121913332,CM930030,COSM13127	0	-	-	PATHOGENIC	PATHOGENIC	Confirmed somatic variant	Confirmed somatic variant	1	1	1	1
chr5:112175390	APC	T	C	0.005556	stop_gained	HIGH	APC	rs121913328,CM940072,COSM13121,COSM3696863	0	-	-	PATHOGENIC	PATHOGENIC	Confirmed somatic variant	Confirmed somatic variant	1	1	1	1
chr17:7577556	TP53	T	C	0.005556	missense_variant	MODERATE	TP53	rs121912655,CM910618,TP53_g.13362G>A,COSM10646,COSM10810,COSM11133,COSM129834,COSM129835,COSM129836,COSM1610838,COSM1610839,COSM1610840,COSM1646852,COSM251396,COSM251397,COSM251398,COSM2744611,COSM2744612,COSM3378347,COSM3403262,COSM3717642	0	deleterious(0)	probably_damaging(1)	PATHOGENIC	PATHOGENIC	Confirmed somatic variant	Confirmed somatic variant	1	1	1	1
chr17:7577539	TP53	A	G	0.005556	missense_variant	MODERATE	TP53	rs121912651,CM010465,CM900211,COSM10656,COSM11564,COSM1189381,COSM1189382,COSM1189383,COSM120005,COSM120006,COSM120007,COSM1640831,COSM2744594,COSM3388183,COSM4271789,COSM44920,COSM45116,COSM6955535,COSM6955536,COSM6955537,COSM6955538,COSM6955539,COSM7325547,COSM7325548,COSM7325549,COSM7325550,COSM7325551	0	deleterious(0)	probably_damaging(1)	PATHOGENIC	PATHOGENIC	Confirmed somatic variant	Confirmed somatic variant	1	1	1	1
chr12:121416650	HNF1A	C	A	0.02222	missense_variant	MODERATE	HNF1A	rs1169288,CM001349,COSM430522	0	tolerated(0.07)	probably_damaging(0.927)	PATHOGENIC	PATHOGENIC	Confirmed somatic variant	Confirmed somatic variant	1	1	1	1
chr4:153249510	FBXW7	A	C	0.005556	missense_variant	MODERATE	FBXW7	rs1157879635,COSM1052095,COSM1052096,COSM1052097,COSM1154295,COSM22984,COSM5751152,COSM5751153,COSM5751154,COSM5751155,COSM5751156,COSM6854281	0	deleterious(0)	probably_damaging(1)	PATHOGENIC	PATHOGENIC	Confirmed somatic variant	Confirmed somatic variant	1	1	1	1
chr17:7577538	TP53	T	C	0.01111	missense_variant	MODERATE	TP53	rs11540652,CM920675,TP53_g.13380G>A,COSM10662,COSM11491,COSM1640830,COSM1646857,COSM1646858,COSM241994,COSM241995,COSM241996,COSM3356964,COSM3378346,COSM340105,COSM340106,COSM340107,COSM3726799,COSM46135,COSM6549,COSM99020,COSM99021,COSM99602	0	deleterious(0)	probably_damaging(0.994)	PATHOGENIC	PATHOGENIC	Confirmed somatic variant	Confirmed somatic variant	1	1	1	1
chr12:25362777	KRAS	G	A	0.1667	3_prime_UTR_variant	MODIFIER	KRAS	rs1137282,COSM3753105	0	-	-	PATHOGENIC	PATHOGENIC	Confirmed somatic variant	Confirmed somatic variant	1	1	1	1
chr1:11181327	MTOR	T	C	0.04444	synonymous_variant	LOW	MTOR	rs11121691,COSM3996743	0	-	-	PATHOGENIC	PATHOGENIC	Confirmed somatic variant	Confirmed somatic variant	1	1	1	1
chr17:37884037	ERBB2	G	C	0.3778	missense_variant	MODERATE	ERBB2	rs1058808,CM087578,COSM5436892	0	tolerated(0.1)	possibly_damaging(0.473)	PATHOGENIC	PATHOGENIC	Confirmed somatic variant	Confirmed somatic variant	1	1	1	1
chr18:48593405	SMAD4	A	G	0.005556	missense_variant	MODERATE	SMAD4	rs1057519962,COSM1389070,COSM14147,COSM14249	0	deleterious(0.04)	probably_damaging(1)	PATHOGENIC	PATHOGENIC	Confirmed somatic variant	Confirmed somatic variant	1	1	1	1
chr3:30732970	TGFBR2	A	G	0.005556	missense_variant	MODERATE	TGFBR2	rs104893815,CM050762,COSM33076,COSM3392341,COSM3392342,COSM4733387,COSM6503126	0	deleterious(0)	probably_damaging(1)	PATHOGENIC	PATHOGENIC	Confirmed somatic variant	Confirmed somatic variant	1	1	1	1
chr17:12016675	MAP2K4	A	G	0.005556	missense_variant,splice_region_variant	MODERATE	MAP2K4	COSM975562	0	deleterious(0)	probably_damaging(0.99)	PATHOGENIC	PATHOGENIC	Confirmed somatic variant	Confirmed somatic variant	1	1	1	1
chr10:114910882	TCF7L2	G	C	0.005556	stop_gained,splice_region_variant	HIGH	TCF7L2	COSM6968325,COSM6968326,COSM6968327,COSM6968328,COSM6968329,COSM914865,COSM914866,COSM914867	0	-	-	PATHOGENIC	PATHOGENIC	Confirmed somatic variant	Confirmed somatic variant	1	1	1	1
chr1:193111048	CDC73	T	G	0.005556	missense_variant	MODERATE	CDC73	COSM6929692,COSM901383	0	deleterious(0)	probably_damaging(0.927)	PATHOGENIC	PATHOGENIC	Confirmed somatic variant	Confirmed somatic variant	1	1	1	1
chr7:2979448	CARD11	T	G	0.005556	missense_variant	MODERATE	CARD11	COSM6915596	0	tolerated(0.17)	possibly_damaging(0.719)	PATHOGENIC	PATHOGENIC	Confirmed somatic variant	Confirmed somatic variant	1	1	1	1
chrX:41075279	USP9X	A	G	0.008	missense_variant	MODERATE	USP9X	COSM6819135,COSM6819136	0	deleterious(0)	probably_damaging(0.997)	PATHOGENIC	PATHOGENIC	Confirmed somatic variant	Confirmed somatic variant	1	1	1	1
chr1:147091495	BCL9	T	C	0.005556	stop_gained	HIGH	BCL9	COSM6610781	0	-	-	PATHOGENIC	PATHOGENIC	Confirmed somatic variant	Confirmed somatic variant	1	1	1	1
chr2:212812179	ERBB4	A	C	0.005556	stop_gained	HIGH	ERBB4	COSM6197845,COSM7250661,COSM7250662	0	-	-	PATHOGENIC	PATHOGENIC	Confirmed somatic variant	Confirmed somatic variant	1	1	1	1
chr10:123260408	FGFR2	A	G	0.005556	missense_variant	MODERATE	FGFR2	COSM5483441,COSM5483442,COSM5483443,COSM5483444,COSM5483445	0	deleterious(0)	benign(0.057)	PATHOGENIC	PATHOGENIC	Confirmed somatic variant	Confirmed somatic variant	1	1	1	1
chr5:112173953	APC	T	G	0.005556	missense_variant	MODERATE	APC	COSM5025153	0	tolerated(0.32)	benign(0.007)	PATHOGENIC	PATHOGENIC	Confirmed somatic variant	Confirmed somatic variant	1	1	1	1
chr17:37665992	CDK12	T	C	0.005556	missense_variant	MODERATE	CDK12	COSM4898992	0	deleterious(0)	probably_damaging(1)	PATHOGENIC	PATHOGENIC	Confirmed somatic variant	Confirmed somatic variant	1	1	1	1
chr7:106509723	PIK3CG	T	G	0.005556	stop_gained	HIGH	PIK3CG	COSM3254603,COSM3631744	0	-	-	PATHOGENIC	PATHOGENIC	Confirmed somatic variant	Confirmed somatic variant	1	1	1	1
chr3:41277275	CTNNB1	T	C	0.005556	missense_variant	MODERATE	CTNNB1	COSM2987971	0	deleterious(0)	probably_damaging(0.991)	PATHOGENIC	PATHOGENIC	Confirmed somatic variant	Confirmed somatic variant	1	1	1	1
chr11:4148290	RRM1	A	G	0.005556	missense_variant	MODERATE	RRM1	COSM263457	0	deleterious_low_confidence(0)	probably_damaging(1)	PATHOGENIC	PATHOGENIC	Confirmed somatic variant	Confirmed somatic variant	1	1	1	1
chr10:89711992	PTEN	-	C	0.005556	frameshift_variant	HIGH	PTEN	COSM1968247,COSM5100,COSM5279	0	-	-	PATHOGENIC	PATHOGENIC	Confirmed somatic variant	Confirmed somatic variant	1	1	1	1
chr12:46230604	ARID2	T	C	0.005556	missense_variant	MODERATE	ARID2	COSM189021	0	deleterious(0)	probably_damaging(0.998)	PATHOGENIC	PATHOGENIC	Confirmed somatic variant	Confirmed somatic variant	1	1	1	1
chr18:45374881	SMAD2	T	C	0.005556	missense_variant	MODERATE	SMAD2	COSM188749,COSM4072370	0	deleterious(0.03)	probably_damaging(1)	PATHOGENIC	PATHOGENIC	Confirmed somatic variant	Confirmed somatic variant	1	1	1	1
chr10:89692928	PTEN	C	T	0.005556	missense_variant	MODERATE	PTEN	COSM1577272	0	deleterious(0)	probably_damaging(0.999)	PATHOGENIC	PATHOGENIC	Confirmed somatic variant	Confirmed somatic variant	1	1	1	1
chr1:144918984	PDE4DIP	T	C	0.005556	missense_variant	MODERATE	PDE4DIP	COSM1333541,COSM1333542,COSM1333543	0	deleterious(0.03)	benign(0.027)	PATHOGENIC	PATHOGENIC	Confirmed somatic variant	Confirmed somatic variant	1	1	1	1
chr1:27106648	ARID1A	A	G	0.005556	missense_variant	MODERATE	ARID1A	COSM132992,COSM5483808	0	deleterious(0.01)	probably_damaging(1)	PATHOGENIC	PATHOGENIC	Confirmed somatic variant	Confirmed somatic variant	1	1	1	1
chr4:153250883	FBXW7	A	G	0.005556	stop_gained	HIGH	FBXW7	COSM1052102,COSM1052103,COSM1052104,COSM1154296,COSM22973,COSM6854476	0	-	-	PATHOGENIC	PATHOGENIC	Confirmed somatic variant	Confirmed somatic variant	1	1	1	1
chr17:7574012	TP53	A	C	0.005556	stop_gained	HIGH	TP53	CM984588,TP53_g.16906G>T,COSM11286,COSM214290,COSM46153,COSM46250,COSM5230441,COSM5230442	0	-	-	PATHOGENIC	PATHOGENIC	Confirmed somatic variant	Confirmed somatic variant	1	1	1	1
chr17:7578406	TP53	T	C	0.005556	missense_variant	MODERATE	TP53	CM062017,CM951224,TP53_g.12512G>A,rs28934578,COSM10648,COSM10718,COSM1640851,COSM1679508,COSM1679509,COSM1679510,COSM1679511,COSM1679512,COSM2744846,COSM2744847,COSM2744848,COSM2744849,COSM2744850,COSM2744851,COSM3355994,COSM4271918,COSM4336268,COSM45416,COSM99022,COSM99023,COSM99024,COSM99914	0	tolerated(0.11)	benign(0.319)	PATHOGENIC	PATHOGENIC	Confirmed somatic variant	Confirmed somatic variant	1	1	1	1
chr5:112175322	APC	A	C	0.005556	stop_gained	HIGH	APC	CM058101,COSM1567581,COSM19135,COSM4166506	0	-	-	PATHOGENIC	PATHOGENIC	Confirmed somatic variant	Confirmed somatic variant	1	1	1	1
chr2:47643551	MSH2	T	G	0.005556	missense_variant	MODERATE	MSH2	CD011638,COSM3426485	0	tolerated(0.33)	benign(0.17)	PATHOGENIC	PATHOGENIC	Confirmed somatic variant	Confirmed somatic variant	1	1	1	1
chr17:7577498	TP53	T	C	0.005556	splice_donor_variant	HIGH	TP53	TP53_g.13420G>A,COSM329756,COSM3717630,COSM3717631,COSM3937599,COSM3937600,COSM3937601,COSM3937602,COSM395657,COSM395658,COSM43571,COSM44640,COSM98254,COSM98255	0	-	-	PATHOGENIC	PATHOGENIC	Reported in another cancer sample as somatic	none	1	1		1
chr17:7578404	TP53	T	A	0.005556	missense_variant	MODERATE	TP53	rs967461896,COSM1172480,COSM1172481,COSM1172482,COSM1172483,COSM1324781,COSM1324782,COSM1324783,COSM1324784,COSM1645227,COSM220757,COSM220758,COSM220759,COSM220760,COSM2744845,COSM3378353,COSM3672588,COSM4139870,COSM4139871,COSM44146,COSM44692,COSM44759,COSM44948	0	deleterious(0)	probably_damaging(0.965)	PATHOGENIC	PATHOGENIC	Reported in another cancer sample as somatic	none	1	1		1
chr17:7577581	TP53	T	A	0.005556	missense_variant	MODERATE	TP53	rs864622237,CM137618,TP53_g.13337T>A,COSM11152,COSM146342,COSM146343,COSM146344,COSM220767,COSM220768,COSM220769,COSM238604,COSM238605,COSM238606,COSM2744649,COSM2744650,COSM3362381,COSM4271828,COSM43768,COSM43956,COSM4782297,COSM4782298	0	deleterious(0)	possibly_damaging(0.903)	PATHOGENIC	PATHOGENIC	Reported in another cancer sample as somatic	Confirmed somatic variant	1	1		1
chr17:7577082	TP53	T	C	0.005556	missense_variant	MODERATE	TP53	rs786201059,CM076567,CM1212545,COSM10726,COSM1480057,COSM1645467,COSM1649346,COSM318163,COSM3522693,COSM43919,COSM44250,COSM45277,COSM4815993,COSM4815994,COSM4976349,COSM99924	0	deleterious(0)	probably_damaging(0.977)	PATHOGENIC	PATHOGENIC	Reported in another cancer sample as somatic	Confirmed somatic variant	1	1		1
chr9:135985831	RALGDS	A	G	0.005556	missense_variant	MODERATE	RALGDS	rs745608287,COSM4649293,COSM4649294,COSM4649295,COSM95132	0	deleterious(0)	possibly_damaging(0.791)	PATHOGENIC	PATHOGENIC	Reported in another cancer sample as somatic	Confirmed somatic variant	1	1		1
chr17:7574003	TP53	A	G	0.005556	stop_gained	HIGH	TP53	rs730882029,CM004908,COSM11073,COSM128665,COSM18597,COSM99721	0	-	-	PATHOGENIC	PATHOGENIC	Reported in another cancer sample as somatic	Confirmed somatic variant	1	1		1
chr17:7578395	TP53	A	G	0.005556	missense_variant	MODERATE	TP53	rs587780070,CM067054,COSM10768,COSM129848,COSM129849,COSM129850,COSM129851,COSM1709730,COSM2744838,COSM326727,COSM326728,COSM326729,COSM326730,COSM3388203,COSM3958834,COSM44151,COSM44776,COSM45520,COSM4749459,COSM4749460,COSM707884,COSM707885,COSM707886,COSM707887	0	deleterious(0)	probably_damaging(0.991)	PATHOGENIC	PATHOGENIC	Reported in another cancer sample as somatic	Confirmed somatic variant	1	1		1
chr17:7578263	TP53	A	G	0.01111	stop_gained	HIGH	TP53	rs397516435,CM941329,TP53_g.12655C>T,COSM10705,COSM1640847,COSM166214,COSM166215,COSM166216,COSM166217,COSM1735837,COSM3378446,COSM44615,COSM44757,COSM5432964,COSM5635597,COSM5635598,COSM5635599,COSM5635600,COSM5635601,COSM5635602,COSM5635603,COSM99665,COSM99666,COSM99667,COSM99668	0	-	-	PATHOGENIC	PATHOGENIC	Reported in another cancer sample as somatic	Confirmed somatic variant	1	1		1
chr4:55593464	KIT	C	A	0.005556	missense_variant	MODERATE	KIT	rs3822214,CM078686,CM088364,COSM28026	0	tolerated(0.37)	benign(0.005)	PATHOGENIC	PATHOGENIC	Reported in another cancer sample as somatic	none	1	1		1
chr10:114903764	TCF7L2	T	G	0.005556	synonymous_variant	LOW	TCF7L2	rs369602107,COSM2053298,COSM2053299,COSM2053300,COSM4173809	0	-	-	PATHOGENIC	PATHOGENIC	Reported in another cancer sample as somatic	Confirmed somatic variant	1	1		1
chr3:142281298	ATR	T	C	0.01111	missense_variant	MODERATE	ATR	rs28897764,COSM1579030	0	tolerated_low_confidence(0.25)	benign(0.011)	PATHOGENIC	PATHOGENIC	Reported in another cancer sample as somatic	Confirmed somatic variant	1	1		1
chr4:55979558	KDR	T	C	0.005556	missense_variant	MODERATE	KDR	rs2305948,CM074307,COSM1131107	0	deleterious(0)	probably_damaging(0.999)	PATHOGENIC	PATHOGENIC	Reported in another cancer sample as somatic	Confirmed somatic variant	1	1		1
chr5:112175216	APC	T	G	0.005556	stop_gained	HIGH	APC	rs1321583762,CD084022,CD941590,CM920052,COSM18775,COSM23563	0	-	-	PATHOGENIC	PATHOGENIC	Reported in another cancer sample as somatic	none	1	1		1
chr3:178916876	PIK3CA	A	G	0.005556	missense_variant	MODERATE	PIK3CA	rs121913287,CM126688,COSM271684,COSM6475603,COSM6475604,COSM746	0	tolerated(0.06)	probably_damaging(0.971)	PATHOGENIC	PATHOGENIC	Reported in another cancer sample as somatic	Confirmed somatic variant	1	1		1
chr10:89624245	PTEN	T	G	0.005556	stop_gained	HIGH	PTEN	COSM5298,COSM5415852	0	-	-	PATHOGENIC	PATHOGENIC	Reported in another cancer sample as somatic	Confirmed somatic variant	1	1		1
chr18:47800596	MBD1	A	C	0.005556	missense_variant	MODERATE	MBD1	COSM4644139,COSM4644140,COSM4644141,COSM4644142,COSM4754513,COSM4754514,COSM4754515,COSM4754516,COSM6709000	0	deleterious(0)	probably_damaging(0.995)	PATHOGENIC	PATHOGENIC	Reported in another cancer sample as somatic	Confirmed somatic variant	1	1		1
chr18:48604701	SMAD4	A	G	0.005556	missense_variant	MODERATE	SMAD4	COSM4382822,COSM6784676	0	deleterious(0)	probably_damaging(0.998)	PATHOGENIC	PATHOGENIC	Reported in another cancer sample as somatic	Confirmed somatic variant	1	1		1
chr10:123325158	FGFR2	A	G	0.005556	missense_variant	MODERATE	FGFR2	rs56226109,COSM6854612	0	tolerated(0.45)	benign(0)	PATHOGENIC	PATHOGENIC	Variant of unknown origin	none	1	1
chr1:11313993	MTOR	A	G	0.005556	missense_variant	MODERATE	MTOR	rs377679898,COSM6854708	0	tolerated(0.43)	benign(0.017)	PATHOGENIC	PATHOGENIC	Variant of unknown origin	none	1	1
chr10:22021981	MLLT10	T	C	0.005556	missense_variant	MODERATE	MLLT10	rs368104484,COSM2133037,COSM2133038	0	deleterious(0.03)	benign(0.148)	PATHOGENIC	PATHOGENIC	Variant of unknown origin	none	1	1
chr6:18236780	DEK	C	T	0.005556	missense_variant	MODERATE	DEK	rs200180483,COSM2856288	0	deleterious(0.03)	probably_damaging(0.915)	PATHOGENIC	PATHOGENIC	Variant of unknown origin	none	1	1
chr3:128202753	GATA2	A	G	0.01667	missense_variant	MODERATE	GATA2	COSM6854635	0	deleterious(0.03)	probably_damaging(0.928)	PATHOGENIC	PATHOGENIC	Variant of unknown origin	none	1	1
chr4:1808286	FGFR3	A	G	0.2778	missense_variant	MODERATE	FGFR3	COSM6854620,COSM6920071,COSM6920072	0	tolerated(0.25)	possibly_damaging(0.722)	PATHOGENIC	PATHOGENIC	Variant of unknown origin	Confirmed somatic variant	1	1		1
chr12:132502873	EP400	T	C	0.005556	missense_variant	MODERATE	EP400	COSM4616445,COSM4616446	0	deleterious(0.03)	benign(0.23)	PATHOGENIC	PATHOGENIC	Variant of unknown origin	none	1	1
chr2:216243903	FN1	A	C	0.005556	stop_gained	HIGH	FN1	COSM2717247,COSM2717248	0	-	-	PATHOGENIC	PATHOGENIC	Variant of unknown origin	none	1	1
chr14:51204959	NIN	T	G	0.005556	missense_variant	MODERATE	NIN	COSM2198680,COSM2198681,COSM2198682,COSM4246135	0	tolerated(0.41)	benign(0.179)	PATHOGENIC	PATHOGENIC	Variant of unknown origin	none	1	1
chr7:140449150	BRAF	C	T	0.1	synonymous_variant	LOW	BRAF	rs9648696,COSM4161857	0	-	-	0	none	Confirmed somatic variant	Confirmed somatic variant	0		1	1
chr19:11169514	SMARCA4	T	C	0.005556	synonymous_variant	LOW	SMARCA4	rs9105,COSM3756294	0	-	-	NEUTRAL	none	Confirmed somatic variant	Confirmed somatic variant	0		1	1
chr5:112176559	APC	G	T	0.4389	synonymous_variant	LOW	APC	rs866006,COSM4166218,COSM6475354	0	-	-	0	PATHOGENIC	Confirmed somatic variant	Confirmed somatic variant	0	1	1	1
chr2:198283305	SF3B1	C	T	0.4	synonymous_variant	LOW	SF3B1	rs788023,COSM1129389	0	-	-	0	none	Confirmed somatic variant	Confirmed somatic variant	0		1	1
chr2:198265526	SF3B1	G	A	0.2833	synonymous_variant	LOW	SF3B1	rs788018,COSM3757860	0	-	-	0	none	Confirmed somatic variant	Confirmed somatic variant	0		1	1
chr16:2115574	TSC2	A	G	0.005556	missense_variant	MODERATE	TSC2	rs777121421,COSM215637,COSM6942788	0	tolerated(0.36)	benign(0.058)	NEUTRAL	none	Confirmed somatic variant	Confirmed somatic variant	0		1	1
chr8:113516210	CSMD3	-	A	0.03889	splice_region_variant,intron_variant	LOW	CSMD3	rs776487254,COSM1181053,COSM1181054	0	-	-	0	none	Confirmed somatic variant	Confirmed somatic variant	0		1	1
chr5:55247869	IL6ST	-	T	0.01111	frameshift_variant	HIGH	IL6ST	rs776023104,COSM269367	0	-	-	0	none	Confirmed somatic variant	Confirmed somatic variant	0		1	1
chr6:152527408	SYNE1	A	G	0.005556	synonymous_variant	LOW	SYNE1	rs772920041,COSM206497,COSM206498,COSM3697383,COSM3697384,COSM3697385	0	-	-	NEUTRAL	none	Confirmed somatic variant	Confirmed somatic variant	0		1	1
chr15:91304139	BLM	-	A	0.01111	frameshift_variant	HIGH	BLM	rs772495493,TMP_ESP_15_91304139_91304139,COSM252959	0	-	-	0	none	Confirmed somatic variant	Confirmed somatic variant	0		1	1
chr6:152697631	SYNE1	T	C	0.005556	missense_variant	MODERATE	SYNE1	rs768750489,COSM1074968,COSM1074969,COSM1154595,COSM4785503,COSM4785504	0	-	benign(0.017)	null	none	Confirmed somatic variant	Confirmed somatic variant	0		1	1
chr16:89809219	FANCA	T	C	0.005556	missense_variant	MODERATE	FANCA	rs766875357,CM125192,COSM267898	0	tolerated(0.48)	benign(0.003)	NEUTRAL	none	Confirmed somatic variant	Confirmed somatic variant	0		1	1
chr2:141607771	LRP1B	A	G	0.005556	synonymous_variant	LOW	LRP1B	rs766034085,COSM1007041,COSM4804027	0	-	-	NEUTRAL	none	Confirmed somatic variant	Confirmed somatic variant	0		1	1
chr2:148683686	ACVR2A	-	A	0.01667	frameshift_variant	HIGH	ACVR2A	rs764719749,COSM252949	0	-	-	0	none	Confirmed somatic variant	Confirmed somatic variant	0		1	1
chr7:100421392	EPHB4	A	G	0.005556	synonymous_variant	LOW	EPHB4	rs762471581,COSM6344946,COSM6655258	0	-	-	NEUTRAL	none	Confirmed somatic variant	Confirmed somatic variant	0		1	1
chr6:52878569	ICK	A	G	0.005556	missense_variant	MODERATE	ICK	rs758321988,COSM1445188	0	tolerated(0.15)	benign(0.003)	NEUTRAL	none	Confirmed somatic variant	Confirmed somatic variant	0		1	1
chr6:56357241	DST	-	A	0.005556	intron_variant	MODIFIER	DST	rs756520184,COSM6649750,COSM6649751	0	-	-	null	none	Confirmed somatic variant	Confirmed somatic variant	0		1	1
chr9:32634481	TAF1L	T	C	0.01111	missense_variant	MODERATE	TAF1L	rs756069082,COSM285559	0	tolerated(1)	benign(0)	NEUTRAL	none	Confirmed somatic variant	Confirmed somatic variant	0		1	1
chr10:76781875	KAT6B	C	A	0.005556	missense_variant	MODERATE	KAT6B	rs754680177,COSM1349125	0	tolerated(0.44)	benign(0.162)	NEUTRAL	none	Confirmed somatic variant	Confirmed somatic variant	0		1	1
chr7:2962934	CARD11	A	G	0.005556	synonymous_variant	LOW	CARD11	rs752956052,COSM4669235	0	-	-	NEUTRAL	none	Confirmed somatic variant	Confirmed somatic variant	0		1	1
chr1:11169776	MTOR	A	G	0.005556	synonymous_variant	LOW	MTOR	rs751449358,COSM6716878	0	-	-	NEUTRAL	none	Confirmed somatic variant	Confirmed somatic variant	0		1	1
chr1:43804317	MPL	T	C	0.005556	missense_variant	MODERATE	MPL	rs750046020,CM090043,COSM414910,COSM5479883	0	tolerated(0.1)	benign(0.084)	NEUTRAL	none	Confirmed somatic variant	Confirmed somatic variant	0		1	1
chr14:99640905	BCL11B	A	G	0.01111	synonymous_variant	LOW	BCL11B	rs74649889,COSM7259204	0	-	-	NEUTRAL	none	Confirmed somatic variant	Confirmed somatic variant	0		1	1
chr20:57478807	GNAS	C	T	0.3889	synonymous_variant	LOW	GNAS	rs7121,CM023931,COSM3758662	0	-	-	NEUTRAL	none	Confirmed somatic variant	Confirmed somatic variant	0		1	1
chr5:35874575	IL7R	T	C	0.01111	missense_variant	MODERATE	IL7R	rs6897932,CM074279,COSM131837,COSM132904	0	tolerated(0.72)	benign(0.018)	NEUTRAL	none	Confirmed somatic variant	Confirmed somatic variant	0		1	1
chr3:47162661	SETD2	G	A	0.1722	synonymous_variant	LOW	SETD2	rs6767907,COSM6353100	0	-	-	NEUTRAL	none	Confirmed somatic variant	Confirmed somatic variant	0		1	1
chr9:139400219	NOTCH1	A	G	0.005556	missense_variant	MODERATE	NOTCH1	rs61751542,COSM3763785,COSM3763786	0	tolerated(0.48)	benign(0)	NEUTRAL	none	Confirmed somatic variant	Confirmed somatic variant	0		1	1
chr19:1223125	STK11	G	C	0.005556	missense_variant	MODERATE	STK11	rs59912467,CM041082,COSM21360	0	tolerated(0.26)	benign(0.022)	NEUTRAL	none	Confirmed somatic variant	Confirmed somatic variant	0		1	1
chr16:89805104	FANCA	A	G	0.005556	missense_variant	MODERATE	FANCA	rs587778321,COSM6660403	0	tolerated(0.54)	benign(0.001)	NEUTRAL	none	Confirmed somatic variant	Confirmed somatic variant	0		1	1
chr5:149505129	PDGFRB	A	G	0.005556	synonymous_variant	LOW	PDGFRB	rs570202484,COSM3212078	0	-	-	NEUTRAL	none	Confirmed somatic variant	Confirmed somatic variant	0		1	1
chr2:198257795	SF3B1	T	C	0.3944	synonymous_variant	LOW	SF3B1	rs4685,COSM3757859	0	-	-	NEUTRAL	none	Confirmed somatic variant	Confirmed somatic variant	0		1	1
chr9:136907005	BRD3	A	G	0.1167	synonymous_variant	LOW	BRD3	rs467387,COSM3763733,COSM3763734	0	-	-	NEUTRAL	none	Confirmed somatic variant	Confirmed somatic variant	0		1	1
chr5:112177171	APC	A	G	0.01667	synonymous_variant	LOW	APC	rs465899,COSM3760872	0	-	-	NEUTRAL	none	Confirmed somatic variant	Confirmed somatic variant	0		1	1
chr9:32631966	TAF1L	A	G	0.005556	synonymous_variant	LOW	TAF1L	rs45559233,COSM3763884	0	-	-	NEUTRAL	none	Confirmed somatic variant	Confirmed somatic variant	0		1	1
chr2:141260668	LRP1B	G	A	0.3111	synonymous_variant	LOW	LRP1B	rs4444457,COSM3757652	0	-	-	NEUTRAL	none	Confirmed somatic variant	Confirmed somatic variant	0		1	1
chr4:55133726	PDGFRA	G	T	0.02222	synonymous_variant	LOW	PDGFRA	rs4358459,COSM1666925	0	-	-	NEUTRAL	none	Confirmed somatic variant	Confirmed somatic variant	0		1	1
chr5:112176325	APC	A	G	0.4389	synonymous_variant	LOW	APC	rs42427,COSM3760870	0	-	-	NEUTRAL	none	Confirmed somatic variant	Confirmed somatic variant	0		1	1
chr7:116436097	MET	A	G	0.2778	synonymous_variant	LOW	MET	rs41737,COSM150379	0	-	-	NEUTRAL	none	Confirmed somatic variant	Confirmed somatic variant	0		1	1
chr7:116435768	MET	T	C	0.3389	synonymous_variant	LOW	MET	rs41736,COSM150377	0	-	-	NEUTRAL	none	Confirmed somatic variant	Confirmed somatic variant	0		1	1
chr1:206649681	IKBKE	A	G	0.005556	synonymous_variant	LOW	IKBKE	rs41296030,COSM1338274	0	-	-	NEUTRAL	none	Confirmed somatic variant	Confirmed somatic variant	0		1	1
chr5:112175770	APC	A	G	0.1222	synonymous_variant	LOW	APC	rs41115,CD108356,COSM19714,COSM3760869,COSM6475518	0	-	-	0	none	Confirmed somatic variant	Confirmed somatic variant	0		1	1
chr8:71041003	NCOA2	T	C	0.005556	synonymous_variant	LOW	NCOA2	rs376018531,COSM6723115	0	-	-	NEUTRAL	none	Confirmed somatic variant	Confirmed somatic variant	0		1	1
chr16:68771372	CDH1	T	C	0.02222	splice_region_variant,intron_variant	LOW	CDH1	rs3743674,COSM5461723	0	-	-	NEUTRAL	none	Confirmed somatic variant	Confirmed somatic variant	0		1	1
chr4:55602765	KIT	C	G	0.02778	synonymous_variant	LOW	KIT	rs3733542,CM058344,COSM1325	0	-	-	NEUTRAL	none	Confirmed somatic variant	Confirmed somatic variant	0		1	1
chr14:99723872	BCL11B	A	G	0.005556	synonymous_variant	LOW	BCL11B	rs370892505,COSM6610650	0	-	-	NEUTRAL	none	Confirmed somatic variant	Confirmed somatic variant	0		1	1
chr10:89690827	PTEN	T	C	0.005556	synonymous_variant	LOW	PTEN	rs35917308,CM043773,COSM3415312,COSM5175	0	-	-	0	none	Confirmed somatic variant	Confirmed somatic variant	0		1	1
chr7:91708898	AKAP9	G	A	0.08889	missense_variant	MODERATE	AKAP9	rs35759833,COSM1673289,COSM1673290	0	tolerated(0.48)	benign(0)	NEUTRAL	none	Confirmed somatic variant	Confirmed somatic variant	0		1	1
chr2:141115582	LRP1B	A	G	0.01111	synonymous_variant	LOW	LRP1B	rs35757222,COSM1564791	0	-	-	NEUTRAL	none	Confirmed somatic variant	Confirmed somatic variant	0		1	1
chr4:55139771	PDGFRA	C	T	0.03889	missense_variant	MODERATE	PDGFRA	rs35597368,COSM4418198,COSM5008347	0	tolerated(0.24)	benign(0)	NEUTRAL	none	Confirmed somatic variant	Confirmed somatic variant	0		1	1
chr2:141259376	LRP1B	A	G	0.06111	synonymous_variant	LOW	LRP1B	rs35164907,COSM3757651	0	-	-	0	none	Confirmed somatic variant	Confirmed somatic variant	0		1	1
chr5:55248135	IL6ST	T	C	0.07222	missense_variant	MODERATE	IL6ST	rs34417936,COSM6049936	0	tolerated(0.27)	benign(0)	0	none	Confirmed somatic variant	Confirmed somatic variant	0		1	1
chr9:93641193	SYK	T	C	0.005556	synonymous_variant	LOW	SYK	rs34231418,COSM3764056,COSM3764057	0	-	-	NEUTRAL	none	Confirmed somatic variant	Confirmed somatic variant	0		1	1
chr16:68862165	CDH1	T	C	0.005556	synonymous_variant	LOW	CDH1	rs33964119,COSM20775,COSM6953299	0	-	-	NEUTRAL	none	Confirmed somatic variant	Confirmed somatic variant	0		1	1
chr5:38486065	LIFR	T	C	0.02778	missense_variant	MODERATE	LIFR	rs3110234,COSM4697935,COSM4697936	0	tolerated(0.14)	benign(0.097)	0	none	Confirmed somatic variant	Confirmed somatic variant	0		1	1
chrX:76937963	ATRX	C	G	0.312	missense_variant	MODERATE	ATRX	rs3088074,COSM3759544	0	tolerated_low_confidence(1)	benign(0)	NEUTRAL	none	Confirmed somatic variant	Confirmed somatic variant	0		1	1
chr4:106196951	TET2	G	A	0.1889	missense_variant	MODERATE	TET2	rs2454206,COSM3760322	0	tolerated(0.29)	benign(0.026)	NEUTRAL	none	Confirmed somatic variant	Confirmed somatic variant	0		1	1
chr9:93641175	SYK	T	C	0.02778	synonymous_variant	LOW	SYK	rs2306041,COSM3764054,COSM3764055	0	-	-	NEUTRAL	none	Confirmed somatic variant	Confirmed somatic variant	0		1	1
chr9:93639973	SYK	C	G	0.05556	synonymous_variant	LOW	SYK	rs2290888,COSM3764050,COSM3764051	0	-	-	NEUTRAL	none	Confirmed somatic variant	Confirmed somatic variant	0		1	1
chr9:135983504	RALGDS	C	T	0.06111	synonymous_variant	LOW	RALGDS	rs2285375,COSM3763714,COSM3763715,COSM3763716,COSM3763717	0	-	-	NEUTRAL	none	Confirmed somatic variant	Confirmed somatic variant	0		1	1
chr1:11190646	MTOR	A	G	0.09444	synonymous_variant	LOW	MTOR	rs2275527,COSM3996746	0	-	-	NEUTRAL	none	Confirmed somatic variant	Confirmed somatic variant	0		1	1
chr9:5081780	JAK2	A	G	0.2778	synonymous_variant	LOW	JAK2	rs2230724,COSM3763953,COSM7244711	0	-	-	NEUTRAL	none	Confirmed somatic variant	Confirmed somatic variant	0		1	1
chr1:65310489	JAK1	C	T	0.2167	synonymous_variant	LOW	JAK1	rs2230588,COSM3751351	0	-	-	NEUTRAL	none	Confirmed somatic variant	Confirmed somatic variant	0		1	1
chr1:65311262	JAK1	A	G	0.03333	synonymous_variant	LOW	JAK1	rs2230587,COSM3751352	0	-	-	NEUTRAL	none	Confirmed somatic variant	Confirmed somatic variant	0		1	1
chr9:139391636	NOTCH1	A	G	0.1722	synonymous_variant	LOW	NOTCH1	rs2229974,COSM3763781,COSM3763782,COSM6903981,COSM6903982	0	-	-	NEUTRAL	none	Confirmed somatic variant	Confirmed somatic variant	0		1	1
chr9:139407932	NOTCH1	G	A	0.1333	synonymous_variant	LOW	NOTCH1	rs2229971,COSM3763787,COSM3763788,COSM6903975,COSM6903976	0	-	-	NEUTRAL	none	Confirmed somatic variant	Confirmed somatic variant	0		1	1
chr4:55130078	PDGFRA	C	T	0.005556	synonymous_variant	LOW	PDGFRA	rs2229307,COSM4416371	0	-	-	NEUTRAL	none	Confirmed somatic variant	Confirmed somatic variant	0		1	1
chr6:152420095	ESR1	A	G	0.01667	synonymous_variant	LOW	ESR1	rs2228480,CM056948,COSM3761556	0	-	-	NEUTRAL	none	Confirmed somatic variant	Confirmed somatic variant	0		1	1
chr5:35871273	IL7R	T	C	0.1056	synonymous_variant	LOW	IL7R	rs2228141,COSM3761218	0	-	-	NEUTRAL	none	Confirmed somatic variant	Confirmed somatic variant	0		1	1
chr9:133755528	ABL1	G	A	0.06667	synonymous_variant	LOW	ABL1	rs2227985,COSM5021130,COSM6191385	0	-	-	0	none	Confirmed somatic variant	Confirmed somatic variant	0		1	1
chr7:55229255	EGFR	A	G	0.1167	missense_variant	MODERATE	EGFR	rs2227983,CM942312,COSM3721608	0	tolerated(0.44)	benign(0)	NEUTRAL	none	Confirmed somatic variant	Confirmed somatic variant	0		1	1
chr3:142277575	ATR	T	A	0.1278	synonymous_variant	LOW	ATR	rs2227930,COSM149486	0	-	-	NEUTRAL	none	Confirmed somatic variant	Confirmed somatic variant	0		1	1
chr3:142277536	ATR	G	A	0.3333	synonymous_variant	LOW	ATR	rs2227929,COSM4002481	0	-	-	NEUTRAL	none	Confirmed somatic variant	Confirmed somatic variant	0		1	1
chr6:152129077	ESR1	C	T	0.1611	synonymous_variant	LOW	ESR1	rs2077647,COSM3761554	0	-	-	NEUTRAL	none	Confirmed somatic variant	Confirmed somatic variant	0		1	1
chr11:64572602	MEN1	A	G	0.2278	synonymous_variant	LOW	MEN1	rs2071313,CD005470,CD982777,CX066452,COSM3752612	0	-	-	NEUTRAL	none	Confirmed somatic variant	Confirmed somatic variant	0		1	1
chr17:62007498	CD79B	G	A	0.2222	synonymous_variant	LOW	CD79B	rs2070776,COSM148316	0	-	-	NEUTRAL	none	Confirmed somatic variant	Confirmed somatic variant	0		1	1
chr22:41551039	EP300	A	T	0.1556	synonymous_variant	LOW	EP300	rs20552,COSM4767796	0	-	-	NEUTRAL	none	Confirmed somatic variant	Confirmed somatic variant	0		1	1
chr7:116436022	MET	A	G	0.3222	synonymous_variant	LOW	MET	rs2023748,COSM150378	0	-	-	NEUTRAL	none	Confirmed somatic variant	Confirmed somatic variant	0		1	1
chr10:89690828	PTEN	A	G	0.005556	missense_variant	MODERATE	PTEN	rs202004587,CM022240,COSM5040	0	tolerated(0.59)	benign(0.005)	0	none	Confirmed somatic variant	Confirmed somatic variant	0		1	1
chr6:160517598	IGF2R	T	C	0.005556	synonymous_variant	LOW	IGF2R	rs201644736,COSM3023588	0	-	-	null	none	Confirmed somatic variant	Confirmed somatic variant	0		1	1
chr11:95825580	MAML2	T	G	0.005556	synonymous_variant	LOW	MAML2	rs200362045,COSM3687729	0	-	-	NEUTRAL	none	Confirmed somatic variant	Confirmed somatic variant	0		1	1
chr5:176517474	FGFR4	T	C	0.005556	missense_variant	MODERATE	FGFR4	rs200344385,COSM1754192,COSM1754193,COSM6918207,COSM6918208	0	deleterious(0.02)	benign(0.332)	NEUTRAL	none	Confirmed somatic variant	Confirmed somatic variant	0		1	1
chr17:5461802	NLRP1	A	G	0.005556	synonymous_variant	LOW	NLRP1	rs199601083,COSM257529,COSM4707206,COSM4707207	0	-	-	NEUTRAL	none	Confirmed somatic variant	Confirmed somatic variant	0		1	1
chr5:35867469	IL7R	A	G	0.005556	missense_variant	MODERATE	IL7R	rs191585195,COSM5868434	0	tolerated(1)	benign(0)	NEUTRAL	none	Confirmed somatic variant	Confirmed somatic variant	0		1	1
chr2:29416366	ALK	C	G	0.1056	missense_variant	MODERATE	ALK	rs1881421,COSM3758201	0	tolerated(1)	benign(0)	NEUTRAL	none	Confirmed somatic variant	Confirmed somatic variant	0		1	1
chr4:55972974	KDR	A	T	0.01111	missense_variant	MODERATE	KDR	rs1870377,CM074306,COSM149673	0	tolerated(0.16)	benign(0.011)	NEUTRAL	none	Confirmed somatic variant	Confirmed somatic variant	0		1	1
chr16:68857441	CDH1	C	T	0.2889	synonymous_variant	LOW	CDH1	rs1801552,COSM3755010	0	-	-	NEUTRAL	none	Confirmed somatic variant	Confirmed somatic variant	0		1	1
chr5:112175211	APC	A	T	0.07222	missense_variant	MODERATE	APC	rs1801155,CD130095,CD972005,CM970090,COSM18809,COSM26697,COSM4169443	0	tolerated(0.7)	benign(0.006)	0	PATHOGENIC	Confirmed somatic variant	Confirmed somatic variant	0	1	1	1
chr2:48023115	MSH6	C	T	0.08333	synonymous_variant	LOW	MSH6	rs1800935,COSM3758252	0	-	-	0	none	Confirmed somatic variant	Confirmed somatic variant	0		1	1
chr8:118832020	EXT1	A	G	0.1889	synonymous_variant	LOW	EXT1	rs17439693,CD087952,CD119123,COSM3164995	0	-	-	0	none	Confirmed somatic variant	Confirmed somatic variant	0		1	1
chr6:18256625	DEK	G	A	0.01667	missense_variant	MODERATE	DEK	rs17336208,COSM7294976	0	tolerated(0.47)	benign(0)	NEUTRAL	none	Confirmed somatic variant	Confirmed somatic variant	0		1	1
chr9:32634467	TAF1L	C	T	0.1444	missense_variant	MODERATE	TAF1L	rs17219559,COSM3763885	0	deleterious(0)	possibly_damaging(0.54)	null	none	Confirmed somatic variant	Confirmed somatic variant	0		1	1
chr10:104386934	SUFU	C	T	0.005556	splice_region_variant,synonymous_variant	LOW	SUFU	rs17114803,COSM4767793	0	-	-	0	none	Confirmed somatic variant	Confirmed somatic variant	0		1	1
chr2:141130695	LRP1B	T	C	0.05556	synonymous_variant	LOW	LRP1B	rs16843864,COSM3757649	0	-	-	NEUTRAL	none	Confirmed somatic variant	Confirmed somatic variant	0		1	1
chr22:36697014	MYH9	A	G	0.005556	synonymous_variant	LOW	MYH9	rs148112044,COSM389437	0	-	-	NEUTRAL	none	Confirmed somatic variant	Confirmed somatic variant	0		1	1
chr21:46320304	ITGB2	A	G	0.005556	synonymous_variant	LOW	ITGB2	rs147150938,COSM1414459,COSM1559591	0	-	-	NEUTRAL	none	Confirmed somatic variant	Confirmed somatic variant	0		1	1
chr11:128442990	ETS1	A	G	0.005556	synonymous_variant	LOW	ETS1	rs145793592,COSM3687177	0	-	-	NEUTRAL	none	Confirmed somatic variant	Confirmed somatic variant	0		1	1
chr14:51196406	NIN	T	C	0.01667	synonymous_variant	LOW	NIN	rs145555295,COSM1369972,COSM1369973,COSM1369974	0	-	-	NEUTRAL	none	Confirmed somatic variant	Confirmed somatic variant	0		1	1
chr10:70332865	TET1	T	C	0.01111	missense_variant	MODERATE	TET1	rs140030732,COSM4167533,COSM6044573	0	tolerated(0.44)	benign(0)	0	none	Confirmed somatic variant	Confirmed somatic variant	0		1	1
chr2:141739814	LRP1B	A	G	0.005556	synonymous_variant	LOW	LRP1B	rs138953199,COSM5474326	0	-	-	NEUTRAL	none	Confirmed somatic variant	Confirmed somatic variant	0		1	1
chr2:141751592	LRP1B	A	G	0.2056	synonymous_variant	LOW	LRP1B	rs13007735,COSM3682418,COSM4964776	0	-	-	NEUTRAL	none	Confirmed somatic variant	Confirmed somatic variant	0		1	1
chr11:534242	HRAS	G	A	0.1722	synonymous_variant	LOW	HRAS	rs12628,CM035804,COSM249860	0	-	-	NEUTRAL	none	Confirmed somatic variant	Confirmed somatic variant	0		1	1
chr5:112174775	APC	A	T	0.005556	missense_variant	MODERATE	APC	rs1210397302,COSM4167199	0	deleterious_low_confidence(0)	probably_damaging(0.998)	0	none	Confirmed somatic variant	Confirmed somatic variant	0		1	1
chr12:121416622	HNF1A	G	C	0.02222	synonymous_variant	LOW	HNF1A	rs1169289,COSM430521	0	-	-	NEUTRAL	none	Confirmed somatic variant	Confirmed somatic variant	0		1	1
chr9:32635308	TAF1L	T	G	0.005556	synonymous_variant	LOW	TAF1L	rs114551428,COSM1462020	0	-	-	NEUTRAL	none	Confirmed somatic variant	Confirmed somatic variant	0		1	1
chr16:15931819	MYH11	A	G	0.01667	synonymous_variant	LOW	MYH11	rs113363750,COSM368622,COSM368623	0	-	-	0	none	Confirmed somatic variant	Confirmed somatic variant	0		1	1
chr2:141739766	LRP1B	A	G	0.005556	synonymous_variant	LOW	LRP1B	rs113154312,COSM3961236	0	-	-	NEUTRAL	none	Confirmed somatic variant	Confirmed somatic variant	0		1	1
chr2:148657117	ACVR2A	A	G	0.3556	synonymous_variant	LOW	ACVR2A	rs1128919,COSM3757658	0	-	-	NEUTRAL	none	Confirmed somatic variant	Confirmed somatic variant	0		1	1
chr17:8046664	PER1	T	C	0.07222	missense_variant	MODERATE	PER1	rs112474322,COSM6743977	0	tolerated(0.36)	benign(0.01)	0	none	Confirmed somatic variant	Confirmed somatic variant	0		1	1
chr7:2946461	CARD11	C	T	0.1	synonymous_variant	LOW	CARD11	rs1124581,COSM3762618	0	-	-	NEUTRAL	none	Confirmed somatic variant	Confirmed somatic variant	0		1	1
chr5:138266546	CTNNA1	A	G	0.1222	synonymous_variant	LOW	CTNNA1	rs1059110,COSM3760934	0	-	-	NEUTRAL	none	Confirmed somatic variant	Confirmed somatic variant	0		1	1
chr9:133761001	ABL1	G	A	0.1333	synonymous_variant	LOW	ABL1	rs1056171,COSM5019122	0	-	-	NEUTRAL	none	Confirmed somatic variant	Confirmed somatic variant	0		1	1
chr19:10600442	KEAP1	C	G	0.2167	synonymous_variant	LOW	KEAP1	rs1048290,COSM148507,COSM5609242	0	-	-	NEUTRAL	none	Confirmed somatic variant	Confirmed somatic variant	0		1	1
chr19:42795554	CIC	C	T	0.01111	synonymous_variant	LOW	CIC	rs10410185,COSM3756832	0	-	-	NEUTRAL	none	Confirmed somatic variant	Confirmed somatic variant	0		1	1
chr4:55143577	PDGFRA	A	G	0.02778	synonymous_variant	LOW	PDGFRA	rs10028020,COSM4417622	0	-	-	NEUTRAL	none	Confirmed somatic variant	Confirmed somatic variant	0		1	1
chr17:7576927	TP53	A	C	0.005556	splice_acceptor_variant	HIGH	TP53	CS0910927,CS114009,TP53_g.13991G>T,COSM127198,COSM1726498,COSM2150608,COSM3701287,COSM3727891,COSM5947890,COSM5947891,COSM5947892,COSM5947893,COSM6917,COSM95740,COSM99956	0	-	-	0	none	Confirmed somatic variant	Confirmed somatic variant	0		1	1
chr11:2154251	IGF2	-	C	0.01667	frameshift_variant	HIGH	IGF2	COSM6955852,COSM6955853	0	-	-	null	none	Confirmed somatic variant	Confirmed somatic variant	0		1	1
chr6:117662397	ROS1	A	C	0.005556	missense_variant	MODERATE	ROS1	COSM6946204,COSM6946205	0	tolerated(0.39)	benign(0.229)	NEUTRAL	none	Confirmed somatic variant	Confirmed somatic variant	0		1	1
chr18:47797892	MBD1	-	T	0.005556	intron_variant	MODIFIER	MBD1	COSM6034111,COSM6034112,COSM6034113	0	-	-	null	none	Confirmed somatic variant	Confirmed somatic variant	0		1	1
chr1:115252352	NRAS	-	A	0.005556	splice_region_variant,intron_variant	LOW	NRAS	COSM5827461	0	-	-	0	none	Confirmed somatic variant	Confirmed somatic variant	0		1	1
chr6:51497377	PKHD1	A	C	0.005556	missense_variant	MODERATE	PKHD1	COSM5537119,COSM6747348	0	deleterious(0)	benign(0.276)	NEUTRAL	none	Confirmed somatic variant	Confirmed somatic variant	0		1	1
chr5:112174867	APC	-	AC	0.005556	frameshift_variant	HIGH	APC	COSM5010238	0	-	-	0	none	Confirmed somatic variant	Confirmed somatic variant	0		1	1
chr3:181430901	SOX2	-	C	0.005556	frameshift_variant	HIGH	SOX2	COSM4748127,COSM6941554	0	-	-	0	PATHOGENIC	Confirmed somatic variant	Confirmed somatic variant	0	1	1	1
chr10:70332273	TET1	-	A	0.005556	frameshift_variant	HIGH	TET1	COSM4733137	0	-	-	0	none	Confirmed somatic variant	Confirmed somatic variant	0		1	1
chr13:29001366	FLT1	A	C	0.005556	missense_variant	MODERATE	FLT1	COSM4046896,COSM4046897,COSM4046898	0	tolerated(0.27)	benign(0.006)	NEUTRAL	none	Confirmed somatic variant	Confirmed somatic variant	0		1	1
chr5:112175529	APC	-	T	0.005556	frameshift_variant	HIGH	APC	COSM29336	0	-	-	0	none	Confirmed somatic variant	Confirmed somatic variant	0		1	1
chr5:112175596	APC	-	A	0.005556	frameshift_variant	HIGH	APC	COSM19607	0	-	-	0	none	Confirmed somatic variant	Confirmed somatic variant	0		1	1
chr1:27106078	ARID1A	-	C	0.005556	frameshift_variant	HIGH	ARID1A	COSM1639822	0	-	-	0	none	Confirmed somatic variant	Confirmed somatic variant	0		1	1
chr8:48701555	PRKDC	-	T	0.005556	frameshift_variant	HIGH	PRKDC	COSM1457267,COSM1457268	0	-	-	null	none	Confirmed somatic variant	Confirmed somatic variant	0		1	1
chr3:47165213	SETD2	-	T	0.01111	frameshift_variant	HIGH	SETD2	COSM1423581	0	-	-	0	none	Confirmed somatic variant	Confirmed somatic variant	0		1	1
chr1:144882800	PDE4DIP	A	G	0.005556	synonymous_variant	LOW	PDE4DIP	COSM1333521,COSM1333522,COSM3472942	0	-	-	NEUTRAL	none	Confirmed somatic variant	Confirmed somatic variant	0		1	1
chr5:112175603	APC	-	A	0.005556	frameshift_variant	HIGH	APC	CD106462,COSM18704,COSM6919389	0	-	-	0	PATHOGENIC	Confirmed somatic variant	Confirmed somatic variant	0	1	1	1
chr7:142561448	EPHB6	-	G	0.1333	frameshift_variant	HIGH	EPHB6	rs773024348,COSM1724520	0	-	-	null	none	Reported in another cancer sample as somatic	Confirmed somatic variant	0			1
chr2:100218013	AFF3	C	T	0.005556	missense_variant	MODERATE	AFF3	rs760333652,COSM4618075	0	tolerated(0.33)	benign(0.122)	NEUTRAL	none	Reported in another cancer sample as somatic	Confirmed somatic variant	0			1
chr3:142269075	ATR	T	C	0.02222	missense_variant	MODERATE	ATR	rs28910271,COSM1579027	0	tolerated(0.29)	benign(0)	NEUTRAL	none	Reported in another cancer sample as somatic	Confirmed somatic variant	0			1
chr3:142275353	ATR	T	C	0.02222	synonymous_variant	LOW	ATR	rs28910270,COSM1579028	0	-	-	NEUTRAL	none	Reported in another cancer sample as somatic	Confirmed somatic variant	0			1
chr3:142280108	ATR	C	T	0.02222	synonymous_variant	LOW	ATR	rs28897765,COSM1579029	0	-	-	NEUTRAL	none	Reported in another cancer sample as somatic	Confirmed somatic variant	0			1
chr3:30713842	TGFBR2	T	C	0.01111	synonymous_variant	LOW	TGFBR2	rs2228048,COSM5020534	0	-	-	NEUTRAL	none	Reported in another cancer sample as somatic	Confirmed somatic variant	0			1
chr3:142281612	ATR	G	A	0.3889	missense_variant	MODERATE	ATR	rs2227928,COSM149487	0	tolerated_low_confidence(0.63)	benign(0)	NEUTRAL	none	Reported in another cancer sample as somatic	Confirmed somatic variant	0			1
chr16:68842734	CDH1	T	C	0.005556	missense_variant	MODERATE	CDH1	rs200310662,COSM1379142	0	deleterious(0.01)	possibly_damaging(0.48)	NEUTRAL	none	Reported in another cancer sample as somatic	none	0			1
chr2:48018081	MSH6	G	A	0.06111	synonymous_variant	LOW	MSH6	rs1800932,COSM4133863	0	-	-	NEUTRAL	none	Reported in another cancer sample as somatic	Confirmed somatic variant	0			1
chr17:7578210	TP53	C	T	0.05556	synonymous_variant	LOW	TP53	rs1800372,CX984230,COSM249885,COSM6965081,COSM6965082,COSM6965083,COSM6965084,COSM6965085,COSM6965086,COSM6965087	0	-	-	NEUTRAL	none	Reported in another cancer sample as somatic	Confirmed somatic variant	0			1
chr5:35861068	IL7R	C	T	0.2278	missense_variant	MODERATE	IL7R	rs1494558,CM1111762,COSM149813	0	tolerated(0.2)	benign(0)	NEUTRAL	none	Reported in another cancer sample as somatic	Confirmed somatic variant	0			1
chr5:35871190	IL7R	A	G	0.1944	missense_variant	MODERATE	IL7R	rs1494555,CM088536,COSM149814	0	tolerated(0.74)	benign(0)	NEUTRAL	none	Reported in another cancer sample as somatic	Confirmed somatic variant	0			1
chr12:25362854	KRAS	T	C	0.06111	intron_variant	MODIFIER	KRAS	rs12313763,COSM5020454	0	-	-	0	none	Reported in another cancer sample as somatic	none	0			1
chr3:30713126	TGFBR2	A	T	0.05556	splice_region_variant,intron_variant	LOW	TGFBR2	rs11466512,COSM149346	0	-	-	NEUTRAL	none	Reported in another cancer sample as somatic	Confirmed somatic variant	0			1
chr1:27105931	ARID1A	-	G	0.005556	frameshift_variant	HIGH	ARID1A	COSM1341426,COSM350030	0	-	-	0	PATHOGENIC	Reported in another cancer sample as somatic	none	0	1		1
chr19:40743996	AKT2	G	C	0.005556	splice_region_variant,synonymous_variant	LOW	AKT2	rs776435289,COSM3225276	0	-	-	NEUTRAL	none	Variant of unknown origin	none	0
chr7:128843396	SMO	A	G	0.005556	missense_variant	MODERATE	SMO	rs61746143,COSM6854787,COSM7328650	0	deleterious(0)	benign(0.372)	0	PATHOGENIC	Variant of unknown origin	Confirmed somatic variant	0	1		1
chr5:112178492	APC	T	C	0.005556	synonymous_variant	LOW	APC	rs2229994,COSM6476031	0	-	-	0	none	Variant of unknown origin	none	0
chr13:28578283	FLT3	A	G	0.005556	missense_variant	MODERATE	FLT3	rs138003347,COSM6854624	0	tolerated(0.05)	benign(0.001)	NEUTRAL	none	Variant of unknown origin	none	0
chr6:152770764	SYNE1	T	G	0.005556	missense_variant	MODERATE	SYNE1	COSM1228212,COSM1228213,COSM1228214	0	-	benign(0)	NEUTRAL	none	Variant of unknown origin	none	0
chr7:92731309	SAMD9	T	C	0.005556	missense_variant	MODERATE	SAMD9	TMP_ESP_7_92731309_92731309,rs138600971,COSM106735	0	tolerated(1)	benign(0)	NR	none	NR	Confirmed somatic variant				1
chr22:42526571	CYP2D6	G	C	0.005556	intron_variant	MODIFIER	CYP2D6	TMP_ESP_22_42526571_42526571	0	-	-	NR	none	NR	none
chr22:42526567	CYP2D6	A	G	0.005556	intron_variant	MODIFIER	CYP2D6	TMP_ESP_22_42526567_42526567	0	-	-	NR	none	NR	none
chr1:27105464	ARID1A	A	C	0.005556	intron_variant	MODIFIER	ARID1A	rs999999540	0	-	-	NR	none	NR	none
chr1:150552092	MCL1	C	G	0.005556	upstream_gene_variant	MODIFIER	MCL1	rs999299229	0	-	-	NR	none	NR	none
chr6:160468278	IGF2R	G	A	0.1556	synonymous_variant	LOW	IGF2R	rs998075	0	-	-	NR	none	NR	none
chr2:142012036	LRP1B	G	T	0.01111	intron_variant	MODIFIER	LRP1B	rs9973397	0	-	-	NR	none	NR	none
chr1:161310519	SDHC	T	C	0.03889	intron_variant	MODIFIER	SDHC	rs9970904	0	-	-	NR	none	NR	none
chr2:141533662	LRP1B	C	T	0.1556	splice_region_variant,intron_variant	LOW	LRP1B	rs996361	0	-	-	NR	none	NR	none
chr18:49867224	DCC	C	T	0.2222	missense_variant	MODERATE	DCC	rs9951523	0	tolerated(0.53)	benign(0)	NR	none	NR	none
chr17:78324048	RNF213	A	T	0.1278	intron_variant	MODIFIER	RNF213	rs9944443	0	-	-	NR	none	NR	none
chr11:4159457	RRM1	G	A	0.3222	synonymous_variant	LOW	RRM1	rs9937	0	-	-	NR	none	NR	none
chr17:78306102	RNF213	C	G	0.05556	missense_variant	MODERATE	RNF213	rs9913636	0	tolerated(0.12)	benign(0.23)	NR	none	NR	none
chr6:117710925	ROS1	G	A	0.01111	synonymous_variant	LOW	ROS1	rs991299652	0	-	-	NR	none	NR	none
chr17:78306308	RNF213	G	C	0.07222	synonymous_variant	LOW	RNF213	rs9908287	0	-	-	NR	none	NR	none
chr8:128750975	MYC	T	G	0.005556	missense_variant	MODERATE	MYC	rs990645227	0	deleterious(0.02)	probably_damaging(0.99)	NR	none	NR	none
chr17:76210367	BIRC5	C	G	0.2111	5_prime_UTR_variant	MODIFIER	BIRC5	rs9904341,CR087414	0	-	-	NR	none	NR	none
chr17:78268496	RNF213	G	C	0.03889	intron_variant	MODIFIER	RNF213	rs9890495	0	-	-	NR	none	NR	none
chr17:45360680	ITGB3	T	C	0.02222	intron_variant	MODIFIER	ITGB3	rs988684	0	-	-	NR	none	NR	none
chr3:10084224	FANCD2	T	C	0.005556	intron_variant	MODIFIER	FANCD2	rs9879080	0	-	-	NR	none	NR	none
chr3:37083740	MLH1	G	A	0.07222	intron_variant	MODIFIER	MLH1	rs9876116	0	-	-	NR	none	NR	none
chr3:142272314	ATR	A	G	0.04444	intron_variant	MODIFIER	ATR	rs9869842	0	-	-	NR	none	NR	none
chr22:33253280	TIMP3	C	T	0.1056	synonymous_variant	LOW	TIMP3	rs9862	0	-	-	NR	none	NR	none
chr3:71247576	FOXP1	T	A	0.01111	intron_variant	MODIFIER	FOXP1	rs9855825	0	-	-	NR	none	NR	none
chr3:134514579	EPHB1	C	T	0.08889	intron_variant	MODIFIER	EPHB1	rs9852662	0	-	-	NR	none	NR	none
chr19:17942556	JAK3	T	C	0.005556	missense_variant	MODERATE	JAK3	rs983583356	0	deleterious(0.02)	benign(0.087)	NR	none	NR	none
chr3:10070417	FANCD2	C	G	0.005556	intron_variant	MODIFIER	FANCD2	rs9833228	0	-	-	NR	none	NR	none
chr3:10133949	FANCD2	G	A	0.08333	intron_variant	MODIFIER	FANCD2	rs9811771	0	-	-	NR	none	NR	none
chr3:10106515	FANCD2	C	T	0.005556	synonymous_variant	LOW	FANCD2	rs9809716	0	-	-	NR	none	NR	none
chr3:10085130	FANCD2	G	C	0.03333	intron_variant	MODIFIER	FANCD2	rs9809061	0	-	-	NR	none	NR	none
chr18:56412830	MALT1	G	A	0.005556	intron_variant	MODIFIER	MALT1	rs973537042	0	-	-	NR	none	NR	none
chr5:149515419	PDGFRB	A	G	0.005556	synonymous_variant	LOW	PDGFRB	rs973132721,COSM6170002	0	-	-	NR	none	NR	none
chr1:237015768	MTR	C	T	0.005556	intron_variant	MODIFIER	MTR	rs970472545	0	-	-	NR	none	NR	none
chr17:78319136	RNF213	A	G	0.3889	missense_variant	MODERATE	RNF213	rs9674961,COSM4000337,COSM4000338	0	tolerated(1)	benign(0)	NR	none	NR	Confirmed somatic variant				1
chr9:134003900	NUP214	G	A	0.09444	intron_variant	MODIFIER	NUP214	rs967174	0	-	-	NR	none	NR	none
chr8:103307533	UBR5	C	T	0.01667	synonymous_variant	LOW	UBR5	rs9650002	0	-	-	NR	none	NR	none
chr17:29679246	NF1	A	G	0.08333	intron_variant	MODIFIER	NF1	rs964288	0	-	-	NR	none	NR	none
chr7:13978809	ETV1	C	T	0.25	missense_variant	MODERATE	ETV1	rs9639168	0	tolerated(0.41)	benign(0)	NR	none	NR	none
chr12:112942533	PTPN11	A	G	0.005556	missense_variant	MODERATE	PTPN11	rs963465148	0	tolerated_low_confidence(0.06)	probably_damaging(0.987)	NR	none	NR	none
chr16:27456613	IL21R	C	G	0.1056	intron_variant	MODIFIER	IL21R	rs963154	0	-	-	NR	none	NR	none
chr22:36705447	MYH9	A	G	0.005556	splice_region_variant,intron_variant	LOW	MYH9	rs9622375	0	-	-	NR	none	NR	none
chr22:36692813	MYH9	A	G	0.03333	intron_variant	MODIFIER	MYH9	rs9622372	0	-	-	NR	none	NR	none
chr22:36700175	MYH9	G	A	0.005556	synonymous_variant	LOW	MYH9	rs9619601	0	-	-	NR	none	NR	none
chr22:22221530	MAPK1	A	G	0.005556	intron_variant	MODIFIER	MAPK1	rs9610504	0	-	-	NR	none	NR	none
chr22:24158895	SMARCB1	G	A	0.02778	intron_variant	MODIFIER	SMARCB1	rs9608192	0	-	-	NR	none	NR	none
chr22:36690247	MYH9	A	G	0.005556	missense_variant	MODERATE	MYH9	rs959272684	0	tolerated(0.36)	benign(0.212)	NR	none	NR	none
chr13:113965176	LAMP1	A	C	0.3278	synonymous_variant	LOW	LAMP1	rs9577503	0	-	-	NR	none	NR	none
chr3:10128824	FANCD2	T	C	0.005556	synonymous_variant	LOW	FANCD2	rs953039787	0	-	-	NR	none	NR	none
chr15:99456553	IGF1R	A	G	0.1111	intron_variant	MODIFIER	IGF1R	rs951715	0	-	-	NR	none	NR	none
chr13:103527930	BIVM-ERCC5	C	G	0.4	missense_variant	MODERATE	ERCC5	rs9514067	0	tolerated(0.75)	benign(0)	NR	none	NR	none
chr13:103527849	BIVM-ERCC5	C	G	0.3	missense_variant	MODERATE	ERCC5	rs9514066	0	tolerated(0.09)	possibly_damaging(0.454)	NR	none	NR	none
chr13:28623759	FLT3	T	C	0.1833	intron_variant	MODIFIER	FLT3	rs9513004	0	-	-	NR	none	NR	none
chr13:28623699	FLT3	T	G	0.2222	intron_variant	MODIFIER	FLT3	rs9507985	0	-	-	NR	none	NR	none
chr11:71714526	NUMA1	G	C	0.3167	3_prime_UTR_variant	MODIFIER	NUMA1	rs949324	0	-	-	NR	none	NR	none
chr11:71714528	NUMA1	T	G	0.3167	3_prime_UTR_variant	MODIFIER	NUMA1	rs949323	0	-	-	NR	none	NR	none
chr6:117708971	ROS1	T	C	0.2444	synonymous_variant	LOW	ROS1	rs9489143	0	-	-	NR	none	NR	none
chr6:117674087	ROS1	A	G	0.08889	intron_variant	MODIFIER	ROS1	rs9481703	0	-	-	NR	none	NR	none
chr3:52685751	PBRM1	G	T	0.005556	splice_region_variant,intron_variant	LOW	PBRM1	rs948123008	0	-	-	NR	none	NR	none
chr6:152658191	SYNE1	C	T	0.06667	intron_variant	MODIFIER	SYNE1	rs9479298	0	-	-	NR	none	NR	none
chr6:152658142	SYNE1	C	T	0.1611	missense_variant	MODERATE	SYNE1	rs9479297	0	-	benign(0)	NR	none	NR	none
chr6:152671475	SYNE1	C	A	0.25	splice_region_variant,intron_variant	LOW	SYNE1	rs9478320	0	-	-	NR	none	NR	none
chr6:51947237	PKHD1	A	G	0.2167	synonymous_variant	LOW	PKHD1	rs9474143	0	-	-	NR	none	NR	none
chr6:51938242	PKHD1	G	A	0.1167	intron_variant	MODIFIER	PKHD1	rs9474140	0	-	-	NR	none	NR	none
chr6:41558952	FOXP4	T	C	0.02222	splice_region_variant,intron_variant	LOW	FOXP4	rs9471605	0	-	-	NR	none	NR	none
chr21:46320382	ITGB2	A	G	0.005556	synonymous_variant	LOW	ITGB2	rs944565426,COSM3405469	0	-	-	NR	none	NR	Confirmed somatic variant				1
chr6:167271711	RPS6KA2	T	C	0.2667	missense_variant	MODERATE	RPS6KA2	rs943687	0	tolerated(0.75)	benign(0)	NR	none	NR	none
chr1:6529748	PLEKHG5	T	G	0.02222	intron_variant	MODIFIER	PLEKHG5	rs943584	0	-	-	NR	none	NR	none
chr9:139412197	NOTCH1	A	G	0.1333	splice_region_variant,intron_variant	LOW	NOTCH1	rs9411208,COSM6495259	0	-	-	NR	none	NR	none
chr6:152805889	SYNE1	T	C	0.1611	intron_variant	MODIFIER	SYNE1	rs9397512	0	-	-	NR	none	NR	none
chr6:152809527	SYNE1	T	A	0.1111	splice_region_variant,intron_variant	LOW	SYNE1	rs9397106	0	-	-	NR	none	NR	none
chr6:152675854	SYNE1	G	A	0.1278	synonymous_variant	LOW	SYNE1	rs9397102	0	-	-	NR	none	NR	none
chr6:51484348	PKHD1	A	G	0.08333	intron_variant	MODIFIER	PKHD1	rs9395699	0	-	-	NR	none	NR	none
chr6:152646279	SYNE1	C	G	0.03889	synonymous_variant	LOW	SYNE1	rs9383987	0	-	-	NR	none	NR	none
chr6:152629617	SYNE1	T	C	0.1333	splice_region_variant,intron_variant	LOW	SYNE1	rs9383985	0	-	-	NR	none	NR	none
chr6:152542548	SYNE1	G	A	0.005556	intron_variant	MODIFIER	SYNE1	rs9383976	0	-	-	NR	none	NR	none
chr6:51732628	PKHD1	A	G	0.06111	intron_variant	MODIFIER	PKHD1	rs9382044	0	-	-	NR	none	NR	none
chr6:51483961	PKHD1	C	T	0.06111	missense_variant	MODERATE	PKHD1	rs9381994	0	tolerated_low_confidence(0.19)	benign(0.024)	NR	none	NR	none
chr12:69202164	MDM2	G	A	0.02778	5_prime_UTR_variant	MODIFIER	MDM2	rs937283	0	-	-	NR	none	NR	none
chr6:152629586	SYNE1	A	G	0.08889	intron_variant	MODIFIER	SYNE1	rs9371581	0	-	-	NR	none	NR	none
chr6:51914956	PKHD1	A	G	0.2389	missense_variant,splice_region_variant	MODERATE	PKHD1	rs9370096	0	tolerated(0.18)	benign(0.001)	NR	none	NR	none
chr6:44217910	HSP90AB1	G	A	0.02778	intron_variant	MODIFIER	HSP90AB1	rs9369468	0	-	-	NR	none	NR	none
chr6:56426931	DST	T	C	0.1444	splice_region_variant,intron_variant	LOW	DST	rs9367689	0	-	-	NR	none	NR	none
chr6:56394173	DST	C	T	0.08333	intron_variant	MODIFIER	DST	rs9357922	0	-	-	NR	none	NR	none
chr6:51586771	PKHD1	A	G	0.06667	intron_variant	MODIFIER	PKHD1	rs9349593	0	-	-	NR	none	NR	none
chr6:167271716	RPS6KA2	T	C	0.4222	missense_variant	MODERATE	RPS6KA2	rs9347162	0	tolerated(0.19)	benign(0.04)	NR	none	NR	none
chr11:69462910	CCND1	A	G	0.3556	splice_region_variant,synonymous_variant	LOW	CCND1	rs9344,CS004528	0	-	-	NR	none	NR	none
chr10:76781872	KAT6B	G	A	0.005556	synonymous_variant	LOW	KAT6B	rs933289359	0	-	-	NR	none	NR	none
chr11:118390624	MLL	A	G	0.005556	intron_variant	MODIFIER	KMT2A	rs9332860	0	-	-	NR	none	NR	none
chr11:118355642	MLL	C	A	0.01111	synonymous_variant	LOW	KMT2A	rs9332801	0	-	-	NR	none	NR	none
chr6:56374754	DST	A	C	0.02222	intron_variant	MODIFIER	DST	rs9296849	0	-	-	NR	none	NR	none
chr6:51890823	PKHD1	A	G	0.1278	missense_variant	MODERATE	PKHD1	rs9296669	0	tolerated(0.4)	benign(0)	NR	none	NR	none
chr2:141299317	LRP1B	G	A	0.1111	intron_variant	MODIFIER	LRP1B	rs9287535	0	-	-	NR	none	NR	none
chr19:1221293	STK11	T	C	0.01111	synonymous_variant	LOW	STK11	rs9282859,COSM2815341,COSM29005,COSM4278109	0	-	-	NR	PATHOGENIC	NR	Confirmed somatic variant		1		1
chr10:43606856	RET	A	G	0.005556	missense_variant	MODERATE	RET	rs9282834,CM1210082,COSM4418655	0	tolerated(0.27)	benign(0.003)	NR	PATHOGENIC	NR	Confirmed somatic variant		1		1
chr1:47685455	TAL1	C	T	0.02222	synonymous_variant	LOW	TAL1	rs927462	0	-	-	NR	none	NR	none
chr6:32180623	NOTCH4	A	C	0.01111	missense_variant	MODERATE	NOTCH4	rs9267835,CM134239	0	deleterious(0)	probably_damaging(0.997)	NR	none	NR	none
chr19:11102050	SMARCA4	C	G	0.005556	intron_variant	MODIFIER	SMARCA4	rs923575080	0	-	-	NR	none	NR	none
chr2:212248254	ERBB4	T	G	0.005556	3_prime_UTR_variant	MODIFIER	ERBB4	rs920954478	0	-	-	NR	none	NR	none
chr12:132535065	EP400	T	G	0.005556	intron_variant	MODIFIER	EP400	rs918538523	0	-	-	NR	none	NR	none
chr20:39709826	TOP1	G	A	0.005556	synonymous_variant	LOW	TOP1	rs917641038	0	-	-	NR	none	NR	none
chr6:32190390	NOTCH4	G	T	0.1889	missense_variant	MODERATE	NOTCH4	rs915894	0	tolerated(0.5)	benign(0)	NR	none	NR	none
chr6:70071173	BAI3	A	G	0.1222	synonymous_variant	LOW	BAI3	rs913543	0	-	-	NR	none	NR	none
chr3:46480801	LTF	G	A	0.01111	synonymous_variant	LOW	LTF	rs9110,CM073189	0	-	-	NR	none	NR	none
chr6:152473181	SYNE1	C	T	0.04444	synonymous_variant	LOW	SYNE1	rs910415	0	-	-	NR	none	NR	none
chr14:23777374	BCL2L2	A	G	0.3889	missense_variant	MODERATE	BCL2L2-PABPN1	rs910332	0	tolerated(0.54)	benign(0)	NR	none	NR	none
chr6:166826255	RPS6KA2	A	G	0.02778	synonymous_variant	LOW	RPS6KA2	rs909631	0	-	-	NR	none	NR	none
chr1:226595647	PARP1	G	C	0.01667	5_prime_UTR_variant	MODIFIER	PARP1	rs907187	0	-	-	NR	none	NR	none
chr1:144857068	PDE4DIP	T	A	0.1556	intron_variant	MODIFIER	PDE4DIP	rs905324	0	-	-	NR	none	NR	none
chr17:37879762	ERBB2	A	G	0.03889	intron_variant	MODIFIER	ERBB2	rs903506	0	-	-	NR	none	NR	none
chr11:47260319	DDB2	G	A	0.1722	intron_variant	MODIFIER	DDB2	rs901746	0	-	-	NR	none	NR	none
chr18:47801262	MBD1	C	T	0.01111	intron_variant	MODIFIER	MBD1	rs898057331	0	-	-	NR	none	NR	none
chr20:39802621	PLCG1	C	G	0.005556	synonymous_variant	LOW	PLCG1	rs897774355	0	-	-	NR	none	NR	none
chr4:62775489	LPHN3	A	G	0.005556	intron_variant	MODIFIER	LPHN3	rs895921655	0	-	-	NR	none	NR	none
chr6:160464289	IGF2R	A	G	0.09444	synonymous_variant	LOW	IGF2R	rs894817	0	-	-	NR	none	NR	none
chr17:5436101	NLRP1	A	G	0.005556	intron_variant	MODIFIER	NLRP1	rs886890653	0	-	-	NR	none	NR	none
chr4:1976703	WHSC1	T	C	0.005556	synonymous_variant	LOW	WHSC1	rs886059319	0	-	-	NR	none	NR	none
chrX:48542749	WAS	A	G	0.008	synonymous_variant	LOW	WAS	rs886038288	0	-	-	NR	none	NR	none
chr9:135974100	RALGDS	A	G	0.01667	synonymous_variant	LOW	RALGDS	rs886017	0	-	-	NR	none	NR	none
chr17:5487164	NLRP1	G	C	0.01111	synonymous_variant	LOW	NLRP1	rs884367	0	-	-	NR	none	NR	none
chr16:15842023	MYH11	A	G	0.01667	splice_region_variant,synonymous_variant	LOW	MYH11	rs880071	0	-	-	NR	none	NR	none
chr5:112162813	APC	T	C	0.005556	stop_gained	HIGH	APC	rs876658868,CD941575,CM970083	0	-	-	NR	none	NR	none
chr5:112175098	APC	G	A	0.005556	missense_variant	MODERATE	APC	rs876658536,CD084024	0	deleterious(0.02)	probably_damaging(0.999)	NR	none	NR	none
chr22:36691691	MYH9	C	T	0.05556	synonymous_variant	LOW	MYH9	rs875725	0	-	-	NR	none	NR	none
chr7:98497071	TRRAP	G	T	0.01667	synonymous_variant	LOW	TRRAP	rs868965529	0	-	-	NR	none	NR	none
chrX:153761219	G6PD	T	C	0.008	missense_variant	MODERATE	G6PD	rs868950643	0	tolerated(0.13)	benign(0)	NR	none	NR	none
chr7:126173626	GRM8	C	T	0.005556	missense_variant	MODERATE	GRM8	rs868712292	0	tolerated(0.13)	benign(0.217)	NR	none	NR	none
chr14:102551784	HSP90AA1	A	G	0.005556	intron_variant	MODIFIER	HSP90AA1	rs868552185	0	-	-	NR	none	NR	none
chr5:131893097	RAD50	T	C	0.005556	synonymous_variant	LOW	RAD50	rs868228536	0	-	-	NR	none	NR	none
chr2:85536129	TCF7L1	-	TCTT	0.04444	intron_variant	MODIFIER	TCF7L1	rs868107792	0	-	-	NR	none	NR	none
chr6:52880896	ICK	A	T	0.02778	synonymous_variant	LOW	ICK	rs868057037	0	-	-	NR	none	NR	none
chr12:46123626	ARID2	C	A	0.005556	missense_variant	MODERATE	ARID2	rs868029449	0	deleterious(0.03)	possibly_damaging(0.852)	NR	none	NR	none
chr4:62936046	LPHN3	A	G	0.005556	missense_variant	MODERATE	LPHN3	rs867851537,COSM5501088,COSM5501089	0	deleterious(0.04)	possibly_damaging(0.781)	NR	none	NR	none
chr17:8052732	PER1	C	A	0.005556	intron_variant	MODIFIER	PER1	rs867732024	0	-	-	NR	none	NR	none
chr8:145741217	RECQL4	T	C	0.005556	upstream_gene_variant	MODIFIER	LRRC14	rs867681178	0	-	-	NR	none	NR	none
chr9:15485946	PSIP1	T	C	0.005556	intron_variant	MODIFIER	PSIP1	rs867593279	0	-	-	NR	none	NR	none
chrX:44938557	KDM6A	C	T	0.008	synonymous_variant	LOW	KDM6A	rs867558265	0	-	-	NR	none	NR	none
chr2:141607792	LRP1B	G	A	0.005556	synonymous_variant	LOW	LRP1B	rs867467038	0	-	-	NR	none	NR	none
chr16:11349230	SOCS1	C	G	0.005556	missense_variant	MODERATE	SOCS1	rs867464575	0	tolerated(0.55)	benign(0.003)	NR	none	NR	none
chr12:56479062	ERBB3	T	C	0.005556	intron_variant	MODIFIER	ERBB3	rs867431245	0	-	-	NR	none	NR	none
chr9:8484332	PTPRD	A	G	0.005556	missense_variant	MODERATE	PTPRD	rs867086172	0	tolerated(0.33)	benign(0.133)	NR	none	NR	none
chr1:186291380	TPR	C	T	0.005556	intron_variant	MODIFIER	TPR	rs867042624	0	-	-	NR	none	NR	none
chr3:142281620	ATR	T	A	0.02222	synonymous_variant	LOW	ATR	rs866939836	0	-	-	NR	none	NR	none
chr11:128391913	ETS1	A	G	0.01111	intron_variant	MODIFIER	ETS1	rs866933907	0	-	-	NR	none	NR	none
chr13:41240255	FOXO1	T	A	0.01667	missense_variant	MODERATE	FOXO1	rs866785231	0	deleterious(0.03)	benign(0.069)	NR	none	NR	none
chr7:98575858	TRRAP	C	A	0.005556	missense_variant	MODERATE	TRRAP	rs866759974	0	tolerated(0.06)	possibly_damaging(0.518)	NR	none	NR	none
chr7:92730999	SAMD9	G	A	0.005556	missense_variant	MODERATE	SAMD9	rs866466388	0	deleterious(0)	benign(0.107)	NR	none	NR	none
chr2:216271271	FN1	A	G	0.005556	intron_variant	MODIFIER	FN1	rs866422093	0	-	-	NR	none	NR	none
chr3:142212097	ATR	G	A	0.005556	synonymous_variant	LOW	ATR	rs866237669	0	-	-	NR	none	NR	none
chr9:98238392	PTCH1	A	G	0.005556	missense_variant	MODERATE	PTCH1	rs863224649	0	deleterious(0)	probably_damaging(0.994)	NR	none	NR	none
chr20:57484241	GNAS	T	C	0.05	synonymous_variant	LOW	GNAS	rs8620,CD031054,CM124406	0	-	-	NR	none	NR	none
chr7:106523446	PIK3CG	G	A	0.1056	intron_variant	MODIFIER	PIK3CG	rs849397	0	-	-	NR	none	NR	none
chr7:106508987	PIK3CG	C	T	0.4333	synonymous_variant	LOW	PIK3CG	rs849390	0	-	-	NR	none	NR	none
chr7:106508978	PIK3CG	G	A	0.4333	synonymous_variant	LOW	PIK3CG	rs849389	0	-	-	NR	none	NR	none
chr2:61108996	REL	T	A	0.04444	intron_variant	MODIFIER	REL	rs842650	0	-	-	NR	none	NR	none
chr2:212812097	ERBB4	C	T	0.02778	intron_variant	MODIFIER	ERBB4	rs839541	0	-	-	NR	none	NR	none
chr20:57485812	GNAS	T	C	0.05556	synonymous_variant	LOW	GNAS	rs8386,COSM5419940	0	-	-	NR	PATHOGENIC	NR	Confirmed somatic variant		1		1
chr6:32163274	NOTCH4	A	G	0.005556	synonymous_variant	LOW	NOTCH4	rs8192583	0	-	-	NR	none	NR	none
chr6:32163799	NOTCH4	C	T	0.01111	synonymous_variant	LOW	NOTCH4	rs8192579	0	-	-	NR	none	NR	none
chr6:32165300	NOTCH4	G	A	0.01111	synonymous_variant	LOW	NOTCH4	rs8192576	0	-	-	NR	none	NR	none
chr6:32190484	NOTCH4	A	G	0.01667	synonymous_variant	LOW	NOTCH4	rs8192569	0	-	-	NR	none	NR	none
chr6:32178520	NOTCH4	A	C	0.01111	intron_variant	MODIFIER	NOTCH4	rs8192567	0	-	-	NR	none	NR	none
chr6:160492947	IGF2R	T	C	0.005556	synonymous_variant	LOW	IGF2R	rs8191881	0	-	-	NR	none	NR	none
chr6:160448324	IGF2R	G	C	0.03889	missense_variant	MODERATE	IGF2R	rs8191754,CM105033	0	deleterious(0)	possibly_damaging(0.702)	NR	none	NR	none
chr8:48689366	PRKDC	T	C	0.03889	intron_variant	MODIFIER	PRKDC	rs8178258	0	-	-	NR	none	NR	none
chr8:48691068	PRKDC	A	G	0.02778	synonymous_variant	LOW	PRKDC	rs8178249	0	-	-	NR	none	NR	none
chr8:48730122	PRKDC	T	C	0.02778	missense_variant,splice_region_variant	MODERATE	PRKDC	rs8178208	0	tolerated(0.48)	benign(0.299)	NR	none	NR	none
chr8:48805788	PRKDC	T	C	0.005556	synonymous_variant	LOW	PRKDC	rs8178087	0	-	-	NR	none	NR	none
chr8:48841708	PRKDC	A	G	0.005556	missense_variant	MODERATE	PRKDC	rs8178046	0	tolerated(0.53)	benign(0.042)	NR	none	NR	none
chr8:48847705	PRKDC	G	T	0.005556	intron_variant	MODIFIER	PRKDC	rs8178024	0	-	-	NR	none	NR	none
chr8:48852225	PRKDC	T	C	0.02778	missense_variant	MODERATE	PRKDC	rs8178017	0	tolerated(0.2)	benign(0)	NR	none	NR	none
chr8:48852328	PRKDC	T	C	0.01667	intron_variant	MODIFIER	PRKDC	rs8178016	0	-	-	NR	none	NR	none
chr7:142566685	EPHB6	CT	-	0.005556	intron_variant	MODIFIER	EPHB6	rs8177164	0	-	-	NR	none	NR	none
chr7:142565743	EPHB6	A	G	0.005556	intron_variant	MODIFIER	EPHB6	rs8177158	0	-	-	NR	none	NR	none
chr7:142565720	EPHB6	A	G	0.01111	intron_variant	MODIFIER	EPHB6	rs8177156	0	-	-	NR	none	NR	none
chr7:142565385	EPHB6	A	G	0.005556	synonymous_variant	LOW	EPHB6	rs8177153	0	-	-	NR	none	NR	none
chr7:142563253	EPHB6	G	T	0.005556	missense_variant	MODERATE	EPHB6	rs8177146	0	tolerated(1)	benign(0)	NR	none	NR	none
chr7:142562011	EPHB6	T	C	0.005556	synonymous_variant	LOW	EPHB6	rs8177141	0	-	-	NR	none	NR	none
chr7:142561677	EPHB6	G	T	0.01667	intron_variant	MODIFIER	EPHB6	rs8177139	0	-	-	NR	none	NR	none
chr19:4117528	MAP2K2	A	G	0.03333	synonymous_variant	LOW	MAP2K2	rs8157,COSM5020491	0	-	-	NR	none	NR	none
chr19:1619339	TCF3	C	T	0.01667	synonymous_variant	LOW	TCF3	rs8140	0	-	-	NR	none	NR	none
chr22:36702102	MYH9	G	A	0.005556	splice_region_variant,intron_variant	LOW	MYH9	rs8137674	0	-	-	NR	none	NR	none
chr12:56495306	ERBB3	T	C	0.03889	splice_region_variant,intron_variant	LOW	ERBB3	rs812826,COSM5019712	0	-	-	NR	none	NR	none
chr6:106547372	PRDM1	G	C	0.06667	missense_variant	MODERATE	PRDM1	rs811925,COSM4160094	0	tolerated(1)	benign(0.036)	NR	PATHOGENIC	NR	Confirmed somatic variant		1		1
chr18:50734032	DCC	A	G	0.005556	intron_variant	MODIFIER	DCC	rs8096698	0	-	-	NR	none	NR	none
chr18:25562831	CDH2	T	C	0.1944	intron_variant	MODIFIER	CDH2	rs8092870	0	-	-	NR	none	NR	none
chr17:78302157	RNF213	A	C	0.3556	missense_variant	MODERATE	RNF213	rs8082521	0	tolerated(1)	benign(0)	NR	none	NR	none
chr17:78306280	RNF213	G	A	0.06667	missense_variant	MODERATE	RNF213	rs8074015	0	tolerated(0.17)	benign(0.001)	NR	none	NR	none
chr17:78363054	RNF213	A	G	0.005556	missense_variant	MODERATE	RNF213	rs8072774	0	tolerated(0.8)	benign(0.001)	NR	none	NR	none
chr17:37671910	CDK12	A	G	0.01667	intron_variant	MODIFIER	CDK12	rs8070799	0	-	-	NR	none	NR	none
chr17:78333840	RNF213	C	T	0.3278	intron_variant	MODIFIER	RNF213	rs8067292	0	-	-	NR	none	NR	none
chr15:40915045	CASC5	G	T	0.1056	synonymous_variant	LOW	CASC5	rs8041534	0	-	-	NR	none	NR	none
chr15:40915190	CASC5	G	A	0.1444	missense_variant	MODERATE	CASC5	rs8040502	0	tolerated(1)	benign(0)	NR	none	NR	none
chr18:48591918	SMAD4	T	C	0.01111	missense_variant	MODERATE	SMAD4	rs80338963,CM040450,CM041789,CM981228,COSM1158192,COSM14140,COSM14151	0	deleterious(0)	probably_damaging(1)	NR	none	NR	none
chr3:52620745	PBRM1	A	G	0.005556	intron_variant	MODIFIER	PBRM1	rs80314598	0	-	-	NR	none	NR	none
chr1:145016035	PDE4DIP	C	A	0.03333	upstream_gene_variant	MODIFIER	RP11-326G21.1	rs80291027	0	-	-	NR	none	NR	none
chr14:51239067	NIN	C	G	0.3556	synonymous_variant	LOW	NIN	rs8020503	0	-	-	NR	none	NR	none
chr12:49426460	MLL2	G	A	0.01667	missense_variant	MODERATE	KMT2D	rs80132640,COSM5020054,COSM5547683,COSM5547684	0	tolerated_low_confidence(0.25)	benign(0.003)	NR	none	NR	none
chr19:10610620	KEAP1	T	C	0.01667	synonymous_variant	LOW	KEAP1	rs80113737	0	-	-	NR	none	NR	none
chr14:102568367	HSP90AA1	T	A	0.2889	missense_variant	MODERATE	HSP90AA1	rs8005905	0	deleterious_low_confidence(0.03)	benign(0)	NR	none	NR	none
chr6:33289731	DAXX	A	G	0.005556	5_prime_UTR_variant	MODIFIER	DAXX	rs80057060	0	-	-	NR	none	NR	none
chr17:75488768	SEP9	A	G	0.01111	synonymous_variant	LOW	SEPT9	rs80015943	0	-	-	NR	none	NR	none
chr6:56483347	DST	C	G	0.005556	intron_variant	MODIFIER	DST	rs79943354	0	-	-	NR	none	NR	none
chr13:28883061	FLT1	A	G	0.2611	synonymous_variant	LOW	FLT1	rs7993418	0	-	-	NR	none	NR	none
chr2:141092084	LRP1B	G	T	0.01111	missense_variant	MODERATE	LRP1B	rs79879036,COSM5019250	0	tolerated(0.64)	possibly_damaging(0.484)	NR	PATHOGENIC	NR	Confirmed somatic variant		1		1
chr11:44130660	EXT2	T	C	0.005556	intron_variant	MODIFIER	EXT2	rs79851468	0	-	-	NR	none	NR	none
chr13:103514091	BIVM-ERCC5	T	C	0.4889	intron_variant	MODIFIER	ERCC5	rs7982448	0	-	-	NR	none	NR	none
chr6:152685964	SYNE1	C	G	0.005556	intron_variant	MODIFIER	SYNE1	rs79796456	0	-	-	NR	none	NR	none
chr5:7891596	MTRR	C	A	0.005556	intron_variant	MODIFIER	MTRR	rs79735541	0	-	-	NR	none	NR	none
chr12:132445086	EP400	C	T	0.03889	intron_variant	MODIFIER	EP400	rs7971054	0	-	-	NR	none	NR	none
chr11:108151707	ATM	A	T	0.02222	intron_variant	MODIFIER	ATM	rs79701258	0	-	-	NR	none	NR	none
chr2:216274854	FN1	-	AC	0.02778	intron_variant	MODIFIER	FN1	rs796781337	0	-	-	NR	none	NR	none
chr22:42526561	CYP2D6	TC	GG	0.005556	intron_variant	MODIFIER	CYP2D6	rs796532118	0	-	-	NR	none	NR	none
chr12:6787622	ZNF384	T	C	0.06111	synonymous_variant	LOW	ZNF384	rs7964510	0	-	-	NR	none	NR	none
chr9:135771867	TSC1	G	A	0.01667	missense_variant	MODERATE	TSC1	rs796053463	0	deleterious(0.01)	probably_damaging(0.909)	NR	none	NR	none
chr20:57415876	GNAS	A	C	0.005556	intron_variant,non_coding_transcript_variant	MODIFIER	GNAS-AS1	rs79527543	0	-	-	NR	none	NR	none
chr11:71717300	NUMA1	T	C	0.01111	missense_variant	MODERATE	NUMA1	rs7949430	0	tolerated(0.1)	benign(0.009)	NR	none	NR	none
chr19:11105608	SMARCA4	C	T	0.2944	synonymous_variant	LOW	SMARCA4	rs7935,COSM4131185	0	-	-	NR	none	NR	none
chr7:66453476	SBDS	G	A	0.01111	missense_variant	MODERATE	SBDS	rs79344818,CM030106	0	deleterious(0.03)	possibly_damaging(0.535)	NR	none	NR	none
chr11:95825797	MAML2	G	A	0.3167	synonymous_variant	LOW	MAML2	rs7931870	0	-	-	NR	none	NR	none
chr11:102195501	BIRC3	G	A	0.005556	synonymous_variant	LOW	BIRC3	rs7930386	0	-	-	NR	none	NR	none
chr7:148513756	EZH2	C	G	0.01111	intron_variant	MODIFIER	EZH2	rs79268614	0	-	-	NR	none	NR	none
chr2:216261851	FN1	T	C	0.005556	intron_variant	MODIFIER	FN1	rs79229169	0	-	-	NR	none	NR	none
chr10:88659758	BMPR1A	A	T	0.01111	intron_variant	MODIFIER	BMPR1A	rs7920259	0	-	-	NR	none	NR	none
chr10:98031160	BLNK	C	T	0.01111	5_prime_UTR_variant	MODIFIER	BLNK	rs7916154	0	-	-	NR	none	NR	none
chr18:56414592	MALT1	C	T	0.005556	intron_variant	MODIFIER	MALT1	rs79073678	0	-	-	NR	none	NR	none
chr1:186332161	TPR	T	A	0.005556	intron_variant	MODIFIER	TPR	rs79035205	0	-	-	NR	none	NR	none
chr1:144854594	PDE4DIP	T	G	0.02778	synonymous_variant	LOW	PDE4DIP	rs79028512	0	-	-	NR	none	NR	none
chr1:220825377	MARK1	C	G	0.01111	missense_variant	MODERATE	MARK1	rs79027592,COSM425358	0	tolerated(0.1)	benign(0)	NR	PATHOGENIC	NR	Confirmed somatic variant		1		1
chr10:104157711	NFKB2	G	T	0.09444	intron_variant	MODIFIER	NFKB2	rs7897947	0	-	-	NR	none	NR	none
chr7:50459405	IKZF1	A	G	0.01111	intron_variant	MODIFIER	IKZF1	rs78889803	0	-	-	NR	none	NR	none
chr6:56426265	DST	T	C	0.005556	synonymous_variant	LOW	DST	rs78882406	0	-	-	NR	none	NR	none
chrX:48116786	SSX1	G	C	0.072	intron_variant	MODIFIER	SSX1	rs7886344	0	-	-	NR	none	NR	none
chr17:78286986	RNF213	C	G	0.03889	intron_variant	MODIFIER	RNF213	rs78857404	0	-	-	NR	none	NR	none
chr19:18888150	CRTC1	T	C	0.005556	synonymous_variant	LOW	CRTC1	rs78830644	0	-	-	NR	none	NR	none
chr2:141773397	LRP1B	A	C	0.03333	synonymous_variant	LOW	LRP1B	rs78806080,COSM7232829	0	-	-	NR	PATHOGENIC	NR	Confirmed somatic variant		1		1
chr2:198265173	SF3B1	A	T	0.1944	intron_variant	MODIFIER	SF3B1	rs788017	0	-	-	NR	none	NR	none
chr2:216272944	FN1	G	A	0.005556	intron_variant	MODIFIER	FN1	rs78792206	0	-	-	NR	none	NR	none
chr9:8319806	PTPRD	T	C	0.05	intron_variant	MODIFIER	PTPRD	rs7873084	0	-	-	NR	none	NR	none
chr9:8484298	PTPRD	A	C	0.005556	missense_variant	MODERATE	PTPRD	rs7869444	0	tolerated(1)	benign(0.005)	NR	none	NR	none
chr1:6537576	PLEKHG5	T	C	0.02222	intron_variant	MODIFIER	PLEKHG5	rs78593902	0	-	-	NR	none	NR	none
chr2:61149538	REL	C	T	0.005556	synonymous_variant	LOW	REL	rs78586857	0	-	-	NR	none	NR	none
chr7:92733975	SAMD9	A	G	0.01667	missense_variant	MODERATE	SAMD9	rs78564070	0	tolerated(0.1)	benign(0)	NR	none	NR	none
chr7:98588256	TRRAP	T	G	0.01667	intron_variant	MODIFIER	TRRAP	rs78509173	0	-	-	NR	none	NR	none
chr7:98609056	TRRAP	G	C	0.005556	synonymous_variant	LOW	TRRAP	rs78504803	0	-	-	NR	none	NR	none
chr1:144854528	PDE4DIP	G	A	0.15	synonymous_variant	LOW	PDE4DIP	rs78461771,rs833192	0	-	-	NR	none	NR	none
chr8:42183529	IKBKB	A	G	0.005556	missense_variant	MODERATE	IKBKB	rs78448523	0	tolerated(0.21)	benign(0.003)	NR	none	NR	none
chr5:112043384	APC	G	T	0.08889	5_prime_UTR_variant	MODIFIER	APC	rs78429131	0	-	-	NR	none	NR	none
chr4:55133715	PDGFRA	G	A	0.005556	splice_region_variant,intron_variant	LOW	PDGFRA	rs78405886	0	-	-	NR	none	NR	none
chr8:48772414	PRKDC	T	C	0.01111	intron_variant	MODIFIER	PRKDC	rs7839407	0	-	-	NR	none	NR	none
chr8:118819578	EXT1	T	C	0.08333	synonymous_variant	LOW	EXT1	rs7837891	0	-	-	NR	none	NR	none
chr1:144854581	PDE4DIP	C	T	0.02778	missense_variant	MODERATE	PDE4DIP	rs78371650	0	tolerated(1)	benign(0)	NR	none	NR	none
chr8:48710955	PRKDC	G	A	0.04444	missense_variant	MODERATE	PRKDC	rs7830743,CM1213050	0	tolerated(0.78)	benign(0)	NR	none	NR	none
chrX:48545185	WAS	T	C	0.008	missense_variant	MODERATE	WAS	rs782745511	0	deleterious(0.01)	benign(0.174)	NR	none	NR	none
chrX:76855054	ATRX	AAAC	-	0.008	splice_region_variant,intron_variant	LOW	ATRX	rs782735894	0	-	-	NR	none	NR	none
chr1:144863457	PDE4DIP	C	G	0.005556	intron_variant	MODIFIER	PDE4DIP	rs782720063	0	-	-	NR	none	NR	none
chr1:120506440	NOTCH2	T	G	0.005556	intron_variant	MODIFIER	NOTCH2	rs782581707	0	-	-	NR	none	NR	none
chr10:97951715	BLNK	-	T	0.01111	3_prime_UTR_variant	MODIFIER	BLNK	rs782515286	0	-	-	NR	none	NR	none
chr1:144931262	PDE4DIP	T	C	0.005556	intron_variant	MODIFIER	PDE4DIP	rs782454042	0	-	-	NR	none	NR	none
chrX:53246334	KDM5C	T	C	0.008	synonymous_variant	LOW	KDM5C	rs782355957	0	-	-	NR	none	NR	none
chr1:145016033	PDE4DIP	-	A	0.005556	upstream_gene_variant	MODIFIER	RP11-326G21.1	rs782224281	0	-	-	NR	none	NR	none
chr1:145039548	PDE4DIP	T	C	0.005556	intron_variant	MODIFIER	PDE4DIP	rs781958816	0	-	-	NR	none	NR	none
chr12:46123631	ARID2	T	G	0.005556	synonymous_variant	LOW	ARID2	rs781723038	0	-	-	NR	none	NR	none
chr11:125499063	CHEK1	G	A	0.02778	intron_variant	MODIFIER	CHEK1	rs78170873	0	-	-	NR	none	NR	none
chr15:39874024	THBS1	T	C	0.005556	splice_region_variant,intron_variant	LOW	THBS1	rs781668577	0	-	-	NR	none	NR	none
chr12:132474592	EP400	A	G	0.01111	synonymous_variant	LOW	EP400	rs781511179	0	-	-	NR	none	NR	none
chr18:25572642	CDH2	T	C	0.005556	missense_variant	MODERATE	CDH2	rs781246502	0	tolerated(0.09)	possibly_damaging(0.808)	NR	none	NR	none
chr9:120475825	TLR4	T	C	0.01111	synonymous_variant	LOW	TLR4	rs780935825	0	-	-	NR	none	NR	none
chr9:8518011	PTPRD	T	A	0.005556	synonymous_variant	LOW	PTPRD	rs780685538	0	-	-	NR	none	NR	none
chr3:47155401	SETD2	C	T	0.01111	synonymous_variant	LOW	SETD2	rs780684040	0	-	-	NR	none	NR	none
chr6:152717896	SYNE1	C	T	0.01111	intron_variant	MODIFIER	SYNE1	rs78034368	0	-	-	NR	none	NR	none
chr7:55214443	EGFR	A	G	0.005556	intron_variant	MODIFIER	EGFR	rs7801956,COSM5019933	0	-	-	NR	none	NR	none
chr22:41572577	EP300	G	T	0.005556	intron_variant	MODIFIER	EP300	rs780087937	0	-	-	NR	none	NR	none
chr8:48777112	PRKDC	A	G	0.005556	splice_region_variant,intron_variant	LOW	PRKDC	rs780022870	0	-	-	NR	none	NR	none
chr21:39764311	ERG	T	C	0.005556	synonymous_variant	LOW	ERG	rs779857828,COSM5962704,COSM5962705	0	-	-	NR	none	NR	Confirmed somatic variant				1
chr14:92488083	TRIP11	G	A	0.005556	synonymous_variant	LOW	TRIP11	rs77981249	0	-	-	NR	none	NR	none
chr16:68862193	CDH1	A	G	0.005556	missense_variant	MODERATE	CDH1	rs779648243	0	deleterious(0)	probably_damaging(1)	NR	none	NR	none
chr16:2125816	TSC2	A	G	0.005556	synonymous_variant	LOW	TSC2	rs779606786	0	-	-	NR	none	NR	none
chr9:135984969	RALGDS	T	C	0.005556	intron_variant	MODIFIER	RALGDS	rs779587989	0	-	-	NR	none	NR	none
chr7:124486980	POT1	C	T	0.2556	intron_variant	MODIFIER	POT1	rs7794637	0	-	-	NR	none	NR	none
chr6:69944886	BAI3	G	A	0.005556	intron_variant	MODIFIER	BAI3	rs779461	0	-	-	NR	none	NR	none
chr9:35074451	FANCG	T	C	0.005556	synonymous_variant	LOW	FANCG	rs779403243	0	-	-	NR	none	NR	none
chr7:100424578	EPHB4	-	C	0.005556	intron_variant	MODIFIER	EPHB4	rs779310210,TMP_ESP_7_100424578_100424578	0	-	-	NR	none	NR	none
chr3:10183898	VHL	G	C	0.005556	intron_variant	MODIFIER	VHL	rs779228671	0	-	-	NR	none	NR	none
chr15:57565339	TCF12	G	A	0.005556	synonymous_variant	LOW	TCF12	rs779169857	0	-	-	NR	none	NR	none
chr20:41100937	PTPRT	A	G	0.005556	synonymous_variant	LOW	PTPRT	rs779107078	0	-	-	NR	none	NR	none
chr1:204495505	MDM4	A	G	0.005556	synonymous_variant	LOW	MDM4	rs778790692	0	-	-	NR	none	NR	none
chr12:46245269	ARID2	A	G	0.005556	synonymous_variant	LOW	ARID2	rs77870470	0	-	-	NR	none	NR	none
chr9:139404162	NOTCH1	A	G	0.005556	intron_variant	MODIFIER	NOTCH1	rs778681556	0	-	-	NR	none	NR	none
chr7:124492038	POT1	C	T	0.05	intron_variant	MODIFIER	POT1	rs7784168	0	-	-	NR	none	NR	none
chr9:32631370	TAF1L	A	G	0.005556	missense_variant	MODERATE	TAF1L	rs778395226,COSM1108221	0	deleterious(0.01)	benign(0.24)	NR	none	NR	Confirmed somatic variant				1
chr21:46308664	ITGB2	A	G	0.005556	missense_variant	MODERATE	ITGB2	rs778278328,COSM3785583	0	tolerated(0.21)	benign(0.089)	NR	none	NR	Confirmed somatic variant				1
chr19:11132673	SMARCA4	T	C	0.005556	intron_variant	MODIFIER	SMARCA4	rs778051177	0	-	-	NR	none	NR	none
chr12:49436005	MLL2	T	C	0.005556	synonymous_variant	LOW	KMT2D	rs77794669,COSM6494191	0	-	-	NR	none	NR	none
chr4:88053606	AFF1	A	C	0.005556	intron_variant	MODIFIER	AFF1	rs777901864	0	-	-	NR	none	NR	none
chr13:103518276	ERCC5	C	T	0.005556	intron_variant	MODIFIER	ERCC5	rs777842292	0	-	-	NR	none	NR	none
chr12:123214371	HCAR1	T	C	0.005556	synonymous_variant	LOW	HCAR1	rs777756646	0	-	-	NR	none	NR	none
chr6:51640787	PKHD1	G	A	0.05	intron_variant	MODIFIER	PKHD1	rs7775050	0	-	-	NR	none	NR	none
chr5:138260284	CTNNA1	C	A	0.005556	synonymous_variant	LOW	CTNNA1	rs777464189	0	-	-	NR	none	NR	none
chr1:144946701	PDE4DIP	T	C	0.005556	missense_variant	MODERATE	PDE4DIP	rs77741848	0	tolerated(1)	benign(0)	NR	none	NR	none
chr1:145015877	PDE4DIP	T	G	0.1389	upstream_gene_variant	MODIFIER	RP11-326G21.1	rs77741369	0	-	-	NR	none	NR	none
chr20:39788754	PLCG1	A	G	0.005556	missense_variant	MODERATE	PLCG1	rs777319797,COSM4098381	0	deleterious(0.02)	benign(0.426)	NR	PATHOGENIC	NR	Confirmed somatic variant		1		1
chr7:106524674	PIK3CG	T	C	0.005556	synonymous_variant	LOW	PIK3CG	rs777299791,COSM5641987	0	-	-	NR	none	NR	Confirmed somatic variant				1
chr4:62775487	LPHN3	A	G	0.005556	intron_variant	MODIFIER	LPHN3	rs777236325	0	-	-	NR	none	NR	none
chr1:204426945	PIK3C2B	T	C	0.005556	missense_variant	MODERATE	PIK3C2B	rs777217709	0	tolerated(0.31)	possibly_damaging(0.46)	NR	none	NR	none
chr19:57742668	AURKC	A	G	0.005556	missense_variant	MODERATE	AURKC	rs777213018	0	tolerated(0.61)	benign(0.001)	NR	none	NR	none
chr7:13950838	ETV1	T	C	0.07222	intron_variant	MODIFIER	ETV1	rs77694863	0	-	-	NR	none	NR	none
chr6:94068070	EPHA7	C	T	0.01111	missense_variant	MODERATE	EPHA7	rs776903613	0	tolerated(0.51)	benign(0)	NR	none	NR	none
chr12:56495016	ERBB3	T	C	0.005556	missense_variant	MODERATE	ERBB3	rs776728303,COSM6973420,COSM6973421	0	deleterious(0)	possibly_damaging(0.828)	NR	PATHOGENIC	NR	Confirmed somatic variant		1		1
chr6:152751758	SYNE1	G	A	0.005556	synonymous_variant	LOW	SYNE1	rs776593228	0	-	-	NR	none	NR	none
chr1:147096505	BCL9	T	C	0.005556	synonymous_variant	LOW	BCL9	rs77650336	0	-	-	NR	none	NR	none
chr2:61717816	XPO1	G	A	0.005556	synonymous_variant	LOW	XPO1	rs776485612,COSM1022112	0	-	-	NR	PATHOGENIC	NR	Confirmed somatic variant		1		1
chr12:69230567	MDM2	G	C	0.01111	intron_variant	MODIFIER	MDM2	rs776351918	0	-	-	NR	none	NR	none
chr15:91358461	BLM	A	G	0.005556	synonymous_variant	LOW	BLM	rs775975894,COSM4605339	0	-	-	NR	none	NR	Confirmed somatic variant				1
chr3:69985838	MITF	A	G	0.005556	intron_variant	MODIFIER	MITF	rs77588960	0	-	-	NR	none	NR	none
chr10:43606811	RET	T	C	0.005556	missense_variant	MODERATE	RET	rs775842917	0	deleterious(0)	possibly_damaging(0.614)	NR	none	NR	none
chr8:103324779	UBR5	G	A	0.005556	intron_variant	MODIFIER	UBR5	rs77580863	0	-	-	NR	none	NR	none
chr6:134491457	SGK1	A	G	0.005556	synonymous_variant	LOW	SGK1	rs7755303	0	-	-	NR	none	NR	none
chr2:178095495	NFE2L2	C	G	0.01111	3_prime_UTR_variant	MODIFIER	NFE2L2	rs77547666	0	-	-	NR	none	NR	none
chr22:41572566	EP300	G	C	0.005556	intron_variant	MODIFIER	EP300	rs77540024	0	-	-	NR	none	NR	none
chr22:39636925	PDGFB	-	CGCA	0.005556	intron_variant	MODIFIER	PDGFB	rs775352234	0	-	-	NR	none	NR	none
chr16:23641552	PALB2	C	T	0.005556	synonymous_variant	LOW	PALB2	rs775283927	0	-	-	NR	none	NR	none
chr4:55133806	PDGFRA	A	G	0.005556	missense_variant	MODERATE	PDGFRA	rs77524207,COSM7133565	0	tolerated(0.19)	benign(0)	NR	none	NR	Confirmed somatic variant				1
chr6:152265370	ESR1	A	G	0.01111	missense_variant	MODERATE	ESR1	rs774979604	0	tolerated(0.46)	benign(0.044)	NR	none	NR	none
chr6:69653858	BAI3	C	T	0.005556	synonymous_variant	LOW	BAI3	rs774970282	0	-	-	NR	none	NR	none
chr1:6529807	PLEKHG5	T	C	0.06111	intron_variant	MODIFIER	PLEKHG5	rs77492523	0	-	-	NR	none	NR	none
chr12:132504710	EP400	T	C	0.005556	missense_variant	MODERATE	EP400	rs774823166	0	deleterious(0.03)	benign(0.023)	NR	none	NR	none
chr19:52709251	PPP2R1A	T	C	0.005556	synonymous_variant	LOW	PPP2R1A	rs774799372	0	-	-	NR	none	NR	none
chr6:56476262	DST	C	T	0.1389	intron_variant	MODIFIER	DST	rs7747060	0	-	-	NR	none	NR	none
chr6:56366285	DST	G	T	0.005556	intron_variant	MODIFIER	DST	rs77434452	0	-	-	NR	none	NR	none
chr12:49416327	MLL2	A	T	0.005556	intron_variant	MODIFIER	KMT2D	rs774135342	0	-	-	NR	none	NR	none
chr2:113993126	PAX8	C	G	0.01111	missense_variant	MODERATE	PAX8	rs774105314	0	tolerated(0.76)	benign(0)	NR	none	NR	none
chr10:70332306	TET1	G	A	0.01667	missense_variant	MODERATE	TET1	rs773573298	0	deleterious(0)	possibly_damaging(0.831)	NR	none	NR	none
chr20:40730905	PTPRT	A	G	0.005556	synonymous_variant	LOW	PTPRT	rs773519135	0	-	-	NR	none	NR	none
chr5:176721068	NSD1	T	C	0.005556	synonymous_variant	LOW	NSD1	rs773449456	0	-	-	NR	none	NR	none
chr6:51890478	PKHD1	G	T	0.005556	missense_variant	MODERATE	PKHD1	rs773345692,COSM7195236,COSM7195237	0	deleterious(0.01)	benign(0.107)	NR	none	NR	Confirmed somatic variant				1
chr8:103309660	UBR5	C	T	0.01111	intron_variant	MODIFIER	UBR5	rs77334328	0	-	-	NR	none	NR	none
chr2:212293212	ERBB4	C	T	0.005556	splice_region_variant,intron_variant	LOW	ERBB4	rs773220688	0	-	-	NR	none	NR	none
chr6:51907900	PKHD1	T	C	0.005556	missense_variant	MODERATE	PKHD1	rs773136605,CM054810,COSM3354776,COSM3354777,COSM6107461,COSM6107462	0	deleterious(0)	probably_damaging(1)	NR	PATHOGENIC	NR	Confirmed somatic variant		1		1
chr12:56494998	ERBB3	T	A	0.02222	missense_variant	MODERATE	ERBB3	rs773123,COSM4989443	0	tolerated(0.14)	probably_damaging(0.996)	NR	PATHOGENIC	NR	Confirmed somatic variant		1		1
chr5:176710684	NSD1	A	G	0.01111	intron_variant	MODIFIER	NSD1	rs77309295	0	-	-	NR	none	NR	none
chr2:198265171	SF3B1	-	T	0.1278	intron_variant	MODIFIER	SF3B1	rs772961618	0	-	-	NR	none	NR	none
chr7:13946300	ETV1	G	C	0.005556	intron_variant	MODIFIER	ETV1	rs77269642	0	-	-	NR	none	NR	none
chr5:233560	SDHA	A	G	0.01111	intron_variant	MODIFIER	SDHA	rs7725241	0	-	-	NR	none	NR	none
chr5:233517	SDHA	A	G	0.03333	intron_variant	MODIFIER	SDHA	rs7725227	0	-	-	NR	none	NR	none
chr3:195594864	TNK2	T	C	0.005556	missense_variant	MODERATE	TNK2	rs772366417	0	tolerated_low_confidence(0.42)	benign(0.009)	NR	none	NR	none
chr11:44130665	EXT2	C	A	0.05556	intron_variant	MODIFIER	EXT2	rs77233576	0	-	-	NR	none	NR	none
chr6:152555766	SYNE1	C	T	0.005556	intron_variant	MODIFIER	SYNE1	rs771920792	0	-	-	NR	none	NR	none
chr7:151875035	MLL3	C	A	0.005556	synonymous_variant	LOW	KMT2C	rs771796740	0	-	-	NR	none	NR	none
chr9:134001158	NUP214	G	C	0.07222	intron_variant	MODIFIER	NUP214	rs77164468	0	-	-	NR	none	NR	none
chr3:41275179	CTNNB1	T	C	0.005556	missense_variant	MODERATE	CTNNB1	rs771596917,COSM317204	0	deleterious(0)	benign(0.368)	NR	PATHOGENIC	NR	Confirmed somatic variant		1		1
chr7:151877022	MLL3	T	C	0.01111	missense_variant	MODERATE	KMT2C	rs771438013	0	tolerated(0.56)	benign(0.001)	NR	none	NR	none
chr1:6527611	PLEKHG5	A	G	0.005556	3_prime_UTR_variant	MODIFIER	PLEKHG5	rs771326239	0	-	-	NR	none	NR	none
chr7:151859705	MLL3	A	G	0.005556	missense_variant	MODERATE	KMT2C	rs771311951	0	tolerated(0.22)	benign(0.057)	NR	none	NR	none
chr6:152708358	SYNE1	C	A	0.005556	missense_variant	MODERATE	SYNE1	rs77121899	0	-	benign(0.355)	NR	none	NR	none
chr5:38489330	LIFR	C	T	0.005556	missense_variant	MODERATE	LIFR	rs771179732,COSM5515048,COSM5515049	0	tolerated(0.09)	probably_damaging(0.994)	NR	PATHOGENIC	NR	Confirmed somatic variant		1		1
chr11:44129645	EXT2	A	G	0.01111	missense_variant	MODERATE	EXT2	rs771039412	0	tolerated(0.17)	benign(0.013)	NR	none	NR	none
chr5:233572	SDHA	G	A	0.03333	intron_variant	MODIFIER	SDHA	rs7710005	0	-	-	NR	none	NR	none
chr17:45367167	ITGB3	A	G	0.01111	intron_variant	MODIFIER	ITGB3	rs770724365	0	-	-	NR	none	NR	none
chr8:38314987	FGFR1	A	G	0.005556	missense_variant	MODERATE	FGFR1	rs770617767	0	tolerated_low_confidence(0.06)	benign(0.012)	NR	none	NR	none
chr7:148515192	EZH2	G	A	0.01667	synonymous_variant	LOW	EZH2	rs77051363,COSM6495173	0	-	-	NR	none	NR	none
chr8:103324795	UBR5	C	T	0.005556	intron_variant	MODIFIER	UBR5	rs77049681	0	-	-	NR	none	NR	none
chr4:88047265	AFF1	T	C	0.01111	missense_variant	MODERATE	AFF1	rs770445098	0	deleterious(0.02)	probably_damaging(0.992)	NR	none	NR	none
chr1:120464444	NOTCH2	G	A	0.005556	intron_variant	MODIFIER	NOTCH2	rs770224035	0	-	-	NR	none	NR	none
chr10:96541628	CYP2C19	T	C	0.005556	synonymous_variant	LOW	CYP2C19	rs770126483	0	-	-	NR	none	NR	none
chr14:92470773	TRIP11	G	A	0.005556	synonymous_variant	LOW	TRIP11	rs770035158	0	-	-	NR	none	NR	none
chr8:145737898	RECQL4	A	G	0.005556	downstream_gene_variant	MODIFIER	MFSD3	rs770014424	0	-	-	NR	none	NR	none
chr14:92441067	TRIP11	A	G	0.005556	synonymous_variant	LOW	TRIP11	rs769828661,COSM307151	0	-	-	NR	none	NR	none
chr8:145739002	RECQL4	A	G	0.005556	upstream_gene_variant	MODIFIER	LRRC14	rs769675968	0	-	-	NR	none	NR	none
chr3:71179808	FOXP1	G	A	0.005556	synonymous_variant	LOW	FOXP1	rs769619137	0	-	-	NR	none	NR	none
chr8:90993017	NBN	C	T	0.005556	missense_variant	MODERATE	NBN	rs769414,COSM1258763	0	tolerated(0.41)	benign(0.021)	NR	none	NR	none
chr12:69233215	MDM2	G	A	0.02222	synonymous_variant	LOW	MDM2	rs769412	0	-	-	NR	none	NR	none
chr17:78282757	RNF213	T	A	0.005556	intron_variant	MODIFIER	RNF213	rs76934686	0	-	-	NR	none	NR	none
chr4:55980239	KDR	T	C	0.1778	intron_variant	MODIFIER	KDR	rs7692791	0	-	-	NR	none	NR	none
chr22:42526763	CYP2D6	T	C	0.005556	missense_variant	MODERATE	CYP2D6	rs769258,CM033368	0	tolerated(0.14)	benign(0.024)	NR	none	NR	none
chr7:126882902	GRM8	A	G	0.005556	synonymous_variant	LOW	GRM8	rs769200	0	-	-	NR	none	NR	none
chr2:140990917	LRP1B	G	T	0.005556	intron_variant	MODIFIER	LRP1B	rs76909136	0	-	-	NR	none	NR	none
chr3:14199560	XPC	T	C	0.005556	missense_variant	MODERATE	XPC	rs768979551	0	tolerated(0.12)	benign(0.089)	NR	none	NR	none
chr9:98240410	PTCH1	A	G	0.005556	missense_variant	MODERATE	PTCH1	rs768956985,COSM3780225,COSM3780226,COSM3780227,COSM3780228	0	deleterious(0)	possibly_damaging(0.874)	NR	PATHOGENIC	NR	Confirmed somatic variant		1		1
chr12:43826100	ADAMTS20	C	A	0.005556	splice_region_variant,intron_variant	LOW	ADAMTS20	rs768937064	0	-	-	NR	none	NR	none
chr17:75486899	SEP9	A	G	0.005556	synonymous_variant	LOW	SEPT9	rs768871202	0	-	-	NR	none	NR	none
chr4:1807894	FGFR3	A	G	0.05556	synonymous_variant	LOW	FGFR3	rs7688609	0	-	-	NR	none	NR	none
chr7:151842350	MLL3	C	T	0.005556	missense_variant	MODERATE	KMT2C	rs768809958	0	deleterious(0.02)	probably_damaging(0.983)	NR	none	NR	none
chr17:59926634	FANCJ	-	A	0.005556	intron_variant	MODIFIER	BRIP1	rs768773789	0	-	-	NR	none	NR	none
chr4:55161391	PDGFRA	C	T	0.2222	synonymous_variant	LOW	PDGFRA	rs7685117	0	-	-	NR	none	NR	none
chr10:76735441	KAT6B	A	G	0.005556	missense_variant	MODERATE	KAT6B	rs768502700	0	deleterious(0)	probably_damaging(0.996)	NR	none	NR	none
chr5:38528968	LIFR	-	ACACACACACACAG	0.01667	intron_variant	MODIFIER	LIFR	rs768501276	0	-	-	NR	none	NR	none
chr2:61147749	REL	G	A	0.005556	synonymous_variant	LOW	REL	rs768435135	0	-	-	NR	none	NR	none
chr2:223085898	PAX3	T	G	0.005556	intron_variant	MODIFIER	PAX3	rs768353820	0	-	-	NR	none	NR	none
chr1:186315235	TPR	-	A	0.01111	intron_variant	MODIFIER	TPR	rs768347729,TMP_ESP_1_186315235_186315235	0	-	-	NR	none	NR	none
chr8:93074736	RUNX1T1	C	T	0.005556	intron_variant	MODIFIER	RUNX1T1	rs768035548	0	-	-	NR	none	NR	none
chr3:65350540	MAGI1	A	G	0.005556	missense_variant	MODERATE	MAGI1	rs768012585	0	tolerated(0.08)	benign(0.028)	NR	none	NR	none
chr10:90770374	FAS	A	G	0.005556	intron_variant	MODIFIER	FAS	rs767973417	0	-	-	NR	none	NR	none
chr5:55247221	IL6ST	G	A	0.005556	intron_variant	MODIFIER	IL6ST	rs767954475	0	-	-	NR	none	NR	none
chr2:212652734	ERBB4	T	G	0.005556	intron_variant	MODIFIER	ERBB4	rs767886972	0	-	-	NR	none	NR	none
chr7:91713047	AKAP9	C	T	0.01111	intron_variant	MODIFIER	AKAP9	rs76775274	0	-	-	NR	none	NR	none
chr20:40877515	PTPRT	C	T	0.02222	intron_variant	MODIFIER	PTPRT	rs76773365	0	-	-	NR	none	NR	none
chr9:32630231	TAF1L	G	C	0.005556	missense_variant	MODERATE	TAF1L	rs767729888	0	deleterious_low_confidence(0.04)	probably_damaging(0.999)	NR	none	NR	none
chr4:55127246	PDGFRA	A	G	0.005556	intron_variant	MODIFIER	PDGFRA	rs767694299	0	-	-	NR	none	NR	none
chr5:176637680	NSD1	T	C	0.005556	synonymous_variant	LOW	NSD1	rs767673668	0	-	-	NR	none	NR	none
chr13:28626753	FLT3	T	G	0.005556	synonymous_variant	LOW	FLT3	rs767657203	0	-	-	NR	none	NR	none
chr6:399002	IRF4	C	T	0.005556	intron_variant	MODIFIER	IRF4	rs76757590	0	-	-	NR	none	NR	none
chr8:145738205	RECQL4	-	CT	0.005556	downstream_gene_variant	MODIFIER	MFSD3	rs767501695	0	-	-	NR	none	NR	none
chr2:219556964	STK36	C	T	0.005556	synonymous_variant	LOW	STK36	rs767418851	0	-	-	NR	none	NR	none
chr8:113301796	CSMD3	-	T	0.005556	intron_variant	MODIFIER	CSMD3	rs767401878	0	-	-	NR	none	NR	none
chr6:56394248	DST	A	G	0.005556	missense_variant,splice_region_variant	MODERATE	DST	rs766911461	0	deleterious(0.02)	benign(0.013)	NR	none	NR	none
chr1:179090944	ABL2	A	G	0.01111	missense_variant	MODERATE	ABL2	rs766804361	0	deleterious(0)	probably_damaging(0.975)	NR	none	NR	none
chr1:156845493	NTRK1	GT	-	0.01111	intron_variant	MODIFIER	NTRK1	rs766543019	0	-	-	NR	none	NR	none
chr7:151970982	MLL3	C	T	0.005556	intron_variant	MODIFIER	KMT2C	rs766488818	0	-	-	NR	none	NR	none
chr17:78355469	RNF213	T	C	0.005556	synonymous_variant	LOW	RNF213	rs766450002	0	-	-	NR	none	NR	none
chr9:139393518	NOTCH1	A	G	0.005556	intron_variant	MODIFIER	NOTCH1	rs766356007	0	-	-	NR	none	NR	none
chr3:70008577	MITF	T	C	0.03333	splice_region_variant,intron_variant	LOW	MITF	rs766118369	0	-	-	NR	none	NR	none
chr6:135521189	MYB	C	T	0.03333	intron_variant	MODIFIER	MYB	rs76606753	0	-	-	NR	none	NR	none
chr1:45799040	MUTYH	A	G	0.005556	intron_variant	MODIFIER	MUTYH	rs766066535	0	-	-	NR	none	NR	none
chr15:57213179	TCF12	C	T	0.005556	intron_variant	MODIFIER	TCF12	rs76588581	0	-	-	NR	none	NR	none
chr6:51497503	PKHD1	A	C	0.005556	missense_variant	MODERATE	PKHD1	rs76572975,COSM4161279,COSM7325288	0	tolerated(0.33)	possibly_damaging(0.814)	NR	PATHOGENIC	NR	Confirmed somatic variant		1		1
chr14:102550082	HSP90AA1	C	A	0.005556	intron_variant	MODIFIER	HSP90AA1	rs765681875	0	-	-	NR	none	NR	none
chr6:51613177	PKHD1	T	C	0.1111	synonymous_variant	LOW	PKHD1	rs765525	0	-	-	NR	none	NR	none
chr17:78320953	RNF213	A	G	0.005556	missense_variant	MODERATE	RNF213	rs765178941	0	tolerated(0.3)	benign(0.003)	NR	none	NR	none
chr11:108117898	ATM	-	T	0.005556	intron_variant	MODIFIER	ATM	rs764835999	0	-	-	NR	none	NR	none
chr2:60773269	BCL11A	A	G	0.005556	synonymous_variant	LOW	BCL11A	rs764771964	0	-	-	NR	none	NR	none
chr3:188327555	LPP	C	T	0.07222	missense_variant	MODERATE	LPP	rs7645635	0	tolerated(0.05)	probably_damaging(0.965)	NR	none	NR	none
chr13:113974717	LAMP1	A	G	0.005556	missense_variant	MODERATE	LAMP1	rs764500535	0	tolerated(1)	benign(0.019)	NR	none	NR	none
chr3:134670524	EPHB1	T	C	0.09444	synonymous_variant	LOW	EPHB1	rs7644369	0	-	-	NR	none	NR	none
chr8:48761735	PRKDC	A	G	0.005556	synonymous_variant	LOW	PRKDC	rs764299256	0	-	-	NR	none	NR	none
chr6:160481571	IGF2R	T	C	0.005556	splice_region_variant,intron_variant	LOW	IGF2R	rs764119319	0	-	-	NR	none	NR	none
chr16:15829179	MYH11	A	G	0.005556	intron_variant	MODIFIER	MYH11	rs763902047	0	-	-	NR	none	NR	none
chr19:45260419	BCL3	A	G	0.005556	missense_variant	MODERATE	BCL3	rs763828094,COSM4916338	0	tolerated(0.27)	benign(0)	NR	none	NR	none
chr2:100210422	AFF3	T	C	0.005556	synonymous_variant	LOW	AFF3	rs763821193	0	-	-	NR	none	NR	none
chr3:128205686	GATA2	A	G	0.005556	synonymous_variant	LOW	GATA2	rs763735447	0	-	-	NR	none	NR	none
chr15:40913189	CASC5	G	A	0.005556	missense_variant	MODERATE	CASC5	rs76371152	0	tolerated(0.67)	benign(0)	NR	none	NR	none
chr8:103289349	UBR5	-	T	0.01111	frameshift_variant	HIGH	UBR5	rs763652408,COSM214501	0	-	-	NR	none	NR	none
chr2:141359237	LRP1B	T	A	0.005556	intron_variant	MODIFIER	LRP1B	rs76357349	0	-	-	NR	none	NR	none
chr1:186320513	TPR	T	C	0.005556	synonymous_variant	LOW	TPR	rs76341274	0	-	-	NR	none	NR	none
chr3:37070221	MLH1	T	C	0.01111	intron_variant	MODIFIER	MLH1	rs7633154	0	-	-	NR	none	NR	none
chr2:47637507	MSH2	T	G	0.005556	missense_variant	MODERATE	MSH2	rs763298811,COSM4799884	0	deleterious(0.01)	benign(0.405)	NR	PATHOGENIC	NR	Confirmed somatic variant		1		1
chr12:6760367	ING4	T	C	0.01111	synonymous_variant	LOW	ING4	rs76327967	0	-	-	NR	none	NR	none
chr2:60679641	BCL11A	A	G	0.03333	downstream_gene_variant	MODIFIER	BCL11A	rs763161073	0	-	-	NR	none	NR	none
chr1:32751169	LCK	A	G	0.005556	missense_variant	MODERATE	LCK	rs763148386	0	tolerated(0.14)	possibly_damaging(0.805)	NR	none	NR	none
chr10:123239115	FGFR2	T	C	0.005556	downstream_gene_variant	MODIFIER	FGFR2	rs763095219	0	-	-	NR	none	NR	none
chr16:50820880	CYLD	A	G	0.005556	intron_variant	MODIFIER	CYLD	rs762990204	0	-	-	NR	none	NR	none
chr17:78247230	RNF213	T	C	0.005556	intron_variant	MODIFIER	RNF213	rs76269241	0	-	-	NR	none	NR	none
chr22:41523536	EP300	G	C	0.005556	missense_variant	MODERATE	EP300	rs762647727,COSM4824823,COSM6924248	0	tolerated(0.25)	benign(0.035)	NR	none	NR	none
chr16:15892537	MYH11	T	C	0.005556	synonymous_variant	LOW	MYH11	rs762630727	0	-	-	NR	none	NR	none
chr12:49427084	MLL2	A	G	0.005556	synonymous_variant	LOW	KMT2D	rs762588573	0	-	-	NR	none	NR	none
chr6:51935829	PKHD1	T	C	0.005556	synonymous_variant	LOW	PKHD1	rs762584715	0	-	-	NR	none	NR	none
chr16:15814668	MYH11	G	C	0.005556	intron_variant	MODIFIER	MYH11	rs762533619	0	-	-	NR	none	NR	none
chr16:14014240	ERCC4	A	G	0.05	intron_variant	MODIFIER	ERCC4	rs762521	0	-	-	NR	none	NR	none
chr6:152415511	ESR1	T	C	0.005556	intron_variant	MODIFIER	ESR1	rs762402090	0	-	-	NR	none	NR	none
chr11:108106579	ATM	A	T	0.005556	intron_variant	MODIFIER	ATM	rs762171014	0	-	-	NR	none	NR	none
chr2:48025855	MSH6	T	A	0.005556	missense_variant	MODERATE	MSH6	rs762168786	0	tolerated(0.38)	benign(0.001)	NR	none	NR	none
chr2:148653961	ACVR2A	T	G	0.005556	synonymous_variant	LOW	ACVR2A	rs762145672	0	-	-	NR	none	NR	none
chr3:47162886	SETD2	T	C	0.02778	missense_variant	MODERATE	SETD2	rs76208147,COSM149378,COSM4002710,COSM4002711	0	tolerated_low_confidence(0.11)	benign(0.006)	NR	PATHOGENIC	NR	Confirmed somatic variant		1		1
chr17:75478306	SEP9	T	C	0.005556	missense_variant	MODERATE	SEPT9	rs762063100	0	deleterious(0)	possibly_damaging(0.776)	NR	none	NR	none
chr17:76212752	BIRC5	T	C	0.005556	missense_variant	MODERATE	BIRC5	rs762005531	0	deleterious(0)	probably_damaging(1)	NR	none	NR	none
chr1:145075775	PDE4DIP	A	G	0.005556	missense_variant	MODERATE	PDE4DIP	rs76199660	0	deleterious_low_confidence(0)	possibly_damaging(0.65)	NR	none	NR	none
chrX:63411862	FAM123B	C	G	0.008	synonymous_variant	LOW	AMER1	rs761740157	0	-	-	NR	none	NR	none
chr6:152629631	SYNE1	T	C	0.02778	missense_variant	MODERATE	SYNE1	rs76160752,COSM328205,COSM328206	0	-	benign(0.145)	NR	none	NR	none
chr3:46484898	LTF	T	G	0.3722	intron_variant	MODIFIER	LTF	rs7615975	0	-	-	NR	none	NR	none
chr1:162722881	DDR2	T	C	0.005556	splice_region_variant,intron_variant	LOW	DDR2	rs76156815	0	-	-	NR	none	NR	none
chr6:152793571	SYNE1	-	AT	0.005556	intron_variant	MODIFIER	SYNE1	rs761436977	0	-	-	NR	none	NR	none
chr4:62778452	LPHN3	T	C	0.005556	missense_variant	MODERATE	LPHN3	rs761017943,COSM265492,COSM265493,COSM265494	0	deleterious(0)	probably_damaging(0.971)	NR	none	NR	none
chr12:56491740	ERBB3	C	G	0.01111	intron_variant	MODIFIER	ERBB3	rs76079275	0	-	-	NR	none	NR	none
chr1:150825327	ARNT	-	A	0.005556	intron_variant	MODIFIER	ARNT	rs760694753	0	-	-	NR	none	NR	none
chr6:166826304	RPS6KA2	C	T	0.02222	synonymous_variant	LOW	RPS6KA2	rs760670	0	-	-	NR	none	NR	none
chr17:48273632	COL1A1	T	C	0.005556	intron_variant	MODIFIER	COL1A1	rs76055698	0	-	-	NR	none	NR	none
chr16:15917210	MYH11	A	G	0.005556	missense_variant	MODERATE	MYH11	rs760445629	0	deleterious(0)	possibly_damaging(0.735)	NR	none	NR	none
chr13:41134571	FOXO1	A	C	0.005556	missense_variant	MODERATE	FOXO1	rs760394095,COSM5970984,COSM5970985	0	tolerated(0.79)	benign(0.022)	NR	none	NR	Confirmed somatic variant				1
chr21:46306786	ITGB2	A	G	0.005556	synonymous_variant	LOW	ITGB2	rs760386808,COSM3842041	0	-	-	NR	none	NR	Confirmed somatic variant				1
chr20:31017744	ASXL1	A	G	0.005556	synonymous_variant	LOW	ASXL1	rs760344634	0	-	-	NR	none	NR	none
chr8:113841946	CSMD3	T	C	0.005556	missense_variant	MODERATE	CSMD3	rs760004671,COSM1700528,COSM1700529	0	tolerated(0.85)	probably_damaging(0.998)	NR	PATHOGENIC	NR	Confirmed somatic variant		1		1
chrX:79283631	TBX22	-	C	0.008	intron_variant	MODIFIER	TBX22	rs76000388	0	-	-	NR	none	NR	none
chr2:141528592	LRP1B	C	T	0.03889	intron_variant	MODIFIER	LRP1B	rs7599219	0	-	-	NR	none	NR	none
chr6:52883139	ICK	C	T	0.005556	missense_variant	MODERATE	ICK	rs759836069	0	deleterious(0.01)	possibly_damaging(0.842)	NR	none	NR	none
chr17:78265408	RNF213	A	G	0.005556	intron_variant	MODIFIER	RNF213	rs759766560	0	-	-	NR	none	NR	none
chr2:216272907	FN1	T	A	0.1722	synonymous_variant	LOW	FN1	rs7596677	0	-	-	NR	none	NR	none
chr2:216271812	FN1	T	A	0.15	intron_variant	MODIFIER	FN1	rs7592898	0	-	-	NR	none	NR	none
chr2:216269254	FN1	G	T	0.005556	synonymous_variant	LOW	FN1	rs7589580	0	-	-	NR	none	NR	none
chr1:155159976	MUC1	T	C	0.005556	synonymous_variant	LOW	MUC1	rs758786611	0	-	-	NR	none	NR	none
chr6:152776623	SYNE1	A	G	0.005556	missense_variant	MODERATE	SYNE1	rs758573837	0	-	possibly_damaging(0.724)	NR	none	NR	none
chr19:3533265	FZR1	A	G	0.005556	intron_variant	MODIFIER	FZR1	rs758471391	0	-	-	NR	none	NR	none
chr6:56327807	DST	A	G	0.01111	intron_variant	MODIFIER	DST	rs758173739	0	-	-	NR	none	NR	none
chr6:32169852	NOTCH4	T	C	0.005556	splice_donor_variant	HIGH	NOTCH4	rs758030641	0	-	-	NR	none	NR	none
chr17:5418402	NLRP1	A	G	0.005556	intron_variant	MODIFIER	NLRP1	rs757794946	0	-	-	NR	none	NR	none
chr16:66420975	CDH5	A	G	0.005556	synonymous_variant	LOW	CDH5	rs757664765,COSM237173	0	-	-	NR	none	NR	Confirmed somatic variant				1
chr12:49420369	MLL2	C	T	0.005556	missense_variant	MODERATE	KMT2D	rs757650990	0	deleterious(0.02)	possibly_damaging(0.571)	NR	none	NR	none
chr3:46497805	LTF	T	C	0.005556	synonymous_variant	LOW	LTF	rs757647449	0	-	-	NR	none	NR	none
chr1:65325971	JAK1	A	G	0.005556	intron_variant	MODIFIER	JAK1	rs757622356	0	-	-	NR	none	NR	none
chr8:42761292	HOOK3	G	C	0.005556	intron_variant	MODIFIER	HOOK3	rs757422029	0	-	-	NR	none	NR	none
chr17:37881418	ERBB2	A	G	0.04444	synonymous_variant	LOW	ERBB2	rs757372006	0	-	-	NR	none	NR	none
chr5:149495537	PDGFRB	A	G	0.005556	intron_variant	MODIFIER	PDGFRB	rs75732095	0	-	-	NR	none	NR	none
chr10:76788690	KAT6B	GAA	-	0.005556	inframe_insertion	MODERATE	KAT6B	rs757120352	0	-	-	NR	none	NR	none
chr2:216272819	FN1	G	C	0.3722	intron_variant	MODIFIER	FN1	rs7570208	0	-	-	NR	none	NR	none
chr2:60687959	BCL11A	G	A	0.1556	synonymous_variant	LOW	BCL11A	rs7569946	0	-	-	NR	none	NR	none
chr2:216232556	FN1	T	C	0.1333	intron_variant	MODIFIER	FN1	rs7568287	0	-	-	NR	none	NR	none
chr18:25573641	CDH2	G	T	0.005556	intron_variant	MODIFIER	CDH2	rs756816992	0	-	-	NR	none	NR	none
chr8:145737286	RECQL4	A	G	0.07778	downstream_gene_variant	MODIFIER	GPT	rs756627	0	-	-	NR	none	NR	none
chr11:125505291	CHEK1	-	ATTTAAAAAA	0.005556	intron_variant	MODIFIER	CHEK1	rs756486238	0	-	-	NR	none	NR	none
chr10:22030895	MLLT10	T	G	0.03333	missense_variant	MODERATE	MLLT10	rs756312975	0	tolerated(0.32)	benign(0.015)	NR	none	NR	none
chr6:152702311	SYNE1	C	G	0.005556	missense_variant	MODERATE	SYNE1	rs756300560	0	-	benign(0.01)	NR	none	NR	none
chr16:79628326	MAF	-	T	0.005556	3_prime_UTR_variant	MODIFIER	MAF	rs756191302	0	-	-	NR	none	NR	none
chr1:186332533	TPR	C	T	0.005556	missense_variant	MODERATE	TPR	rs756067406	0	tolerated(1)	benign(0)	NR	none	NR	none
chr8:145739742	RECQL4	T	C	0.005556	upstream_gene_variant	MODIFIER	LRRC14	rs755865911	0	-	-	NR	none	NR	none
chr13:28602292	FLT3	C	T	0.005556	intron_variant	MODIFIER	FLT3	rs75580865	0	-	-	NR	none	NR	none
chr3:65350531	MAGI1	A	G	0.005556	missense_variant	MODERATE	MAGI1	rs755667537	0	tolerated(0.17)	benign(0.44)	NR	none	NR	none
chr1:97771947	DPYD	A	C	0.05	intron_variant	MODIFIER	DPYD	rs7556439	0	-	-	NR	none	NR	none
chr19:52718987	PPP2R1A	G	A	0.01111	intron_variant	MODIFIER	PPP2R1A	rs755532	0	-	-	NR	none	NR	none
chr19:52719190	PPP2R1A	G	A	0.01111	intron_variant	MODIFIER	PPP2R1A	rs755531	0	-	-	NR	none	NR	none
chr2:5833885	SOX11	-	CAGCAGCAGCGG	0.01667	inframe_deletion	MODERATE	SOX11	rs755419138	0	-	-	NR	none	NR	none
chr2:141946088	LRP1B	A	G	0.005556	synonymous_variant	LOW	LRP1B	rs755407635	0	-	-	NR	none	NR	none
chr22:42525236	CYP2D6	C	A	0.01111	intron_variant	MODIFIER	CYP2D6	rs755309061	0	-	-	NR	none	NR	none
chr16:66426127	CDH5	T	C	0.005556	missense_variant	MODERATE	CDH5	rs755175346	0	tolerated(0.5)	benign(0.028)	NR	none	NR	none
chr9:134019891	NUP214	A	G	0.005556	missense_variant	MODERATE	NUP214	rs755153760	0	tolerated(0.06)	benign(0.313)	NR	none	NR	none
chr16:89862388	FANCA	G	A	0.01111	missense_variant	MODERATE	FANCA	rs75501942	0	tolerated(0.06)	benign(0.007)	NR	none	NR	none
chr3:138461345	PIK3CB	T	C	0.005556	intron_variant	MODIFIER	PIK3CB	rs754979380	0	-	-	NR	none	NR	none
chr6:135511029	MYB	A	C	0.005556	splice_region_variant,intron_variant	LOW	MYB	rs754878048	0	-	-	NR	none	NR	none
chr2:29519784	ALK	G	A	0.01111	missense_variant	MODERATE	ALK	rs754810505	0	tolerated(0.98)	benign(0)	NR	none	NR	none
chr17:78346921	RNF213	T	C	0.005556	missense_variant	MODERATE	RNF213	rs754498093	0	deleterious(0)	benign(0.015)	NR	none	NR	none
chr22:41573603	EP300	T	C	0.005556	missense_variant	MODERATE	EP300	rs754423861	0	tolerated(0.29)	benign(0.015)	NR	none	NR	none
chr19:18854887	CRTC1	A	G	0.005556	intron_variant	MODIFIER	CRTC1	rs754407799	0	-	-	NR	none	NR	none
chr1:120480583	NOTCH2	A	G	0.01667	synonymous_variant	LOW	NOTCH2	rs7543643,COSM6494258	0	-	-	NR	none	NR	none
chr1:98058980	DPYD	A	G	0.005556	intron_variant	MODIFIER	DPYD	rs754234706	0	-	-	NR	none	NR	none
chr4:87968427	AFF1	G	A	0.005556	missense_variant	MODERATE	AFF1	rs753869093	0	tolerated(0.27)	benign(0.101)	NR	none	NR	none
chr1:237060854	MTR	A	G	0.01111	splice_region_variant,intron_variant	LOW	MTR	rs753789860	0	-	-	NR	none	NR	none
chr9:5069023	JAK2	A	G	0.005556	missense_variant,splice_region_variant	MODERATE	JAK2	rs753648225	0	tolerated(0.37)	benign(0.007)	NR	none	NR	none
chr5:180055849	FLT4	G	T	0.005556	intron_variant	MODIFIER	FLT4	rs75361132	0	-	-	NR	none	NR	none
chr17:41606544	ETV4	A	G	0.005556	missense_variant	MODERATE	ETV4	rs753554500	0	deleterious(0)	probably_damaging(0.999)	NR	none	NR	none
chr1:120496127	NOTCH2	C	A	0.01667	intron_variant	MODIFIER	NOTCH2	rs7534586	0	-	-	NR	none	NR	none
chr1:120496119	NOTCH2	T	A	0.01667	intron_variant	MODIFIER	NOTCH2	rs7534585	0	-	-	NR	none	NR	none
chr1:120512303	NOTCH2	A	G	0.01111	synonymous_variant	LOW	NOTCH2	rs7533978	0	-	-	NR	none	NR	none
chr20:39797465	PLCG1	C	T	0.2611	missense_variant	MODERATE	PLCG1	rs753381,COSM7216596	0	tolerated(0.3)	benign(0)	NR	none	NR	Confirmed somatic variant				1
chr13:113960884	LAMP1	T	C	0.005556	missense_variant	MODERATE	LAMP1	rs752992439	0	tolerated(0.19)	benign(0.003)	NR	none	NR	none
chr15:40453428	BUB1B	A	G	0.005556	missense_variant	MODERATE	BUB1B	rs752991610	0	tolerated_low_confidence(0.22)	benign(0.001)	NR	none	NR	none
chr3:65415598	MAGI1	A	G	0.005556	synonymous_variant	LOW	MAGI1	rs752760877	0	-	-	NR	none	NR	none
chr5:38528966	LIFR	-	ACACACACACACACAG	0.005556	intron_variant	MODIFIER	LIFR	rs752757847	0	-	-	NR	none	NR	none
chr3:37818902	ITGA9	C	A	0.005556	missense_variant	MODERATE	ITGA9	rs752702491	0	tolerated(0.17)	benign(0.044)	NR	none	NR	none
chr1:186301447	TPR	C	T	0.005556	synonymous_variant	LOW	TPR	rs7526540	0	-	-	NR	none	NR	none
chr6:18236654	DEK	T	C	0.02222	intron_variant	MODIFIER	DEK	rs75250173	0	-	-	NR	none	NR	none
chr14:105237107	AKT1	A	C	0.005556	missense_variant	MODERATE	AKT1	rs751976958	0	tolerated(0.14)	benign(0.044)	NR	none	NR	none
chr3:52713680	PBRM1	A	G	0.005556	synonymous_variant	LOW	PBRM1	rs751747102	0	-	-	NR	none	NR	none
chr3:195595054	TNK2	T	C	0.04444	synonymous_variant	LOW	TNK2	rs7516	0	-	-	NR	none	NR	none
chr6:56479179	DST	G	C	0.005556	missense_variant	MODERATE	DST	rs751524469	0	tolerated(0.49)	benign(0.007)	NR	none	NR	none
chr8:48794018	PRKDC	C	T	0.01111	missense_variant	MODERATE	PRKDC	rs751280765	0	tolerated(0.58)	benign(0)	NR	none	NR	none
chr19:1632358	TCF3	T	C	0.01667	synonymous_variant	LOW	TCF3	rs751149474,COSM6383552,COSM6383553,COSM6931205,COSM6931206	0	-	-	NR	none	NR	none
chr1:11172880	MTOR	A	C	0.005556	intron_variant	MODIFIER	MTOR	rs751114327	0	-	-	NR	none	NR	none
chr16:89877134	FANCA	C	T	0.005556	missense_variant	MODERATE	FANCA	rs750882394	0	deleterious(0.03)	benign(0.212)	NR	none	NR	none
chr16:89833509	FANCA	T	C	0.005556	intron_variant	MODIFIER	FANCA	rs750775612	0	-	-	NR	none	NR	none
chr22:41564696	EP300	T	G	0.01111	intron_variant	MODIFIER	EP300	rs750721066	0	-	-	NR	none	NR	none
chr4:1801021	FGFR3	T	C	0.005556	synonymous_variant	LOW	FGFR3	rs750641928	0	-	-	NR	none	NR	none
chr2:100199374	AFF3	A	G	0.005556	synonymous_variant	LOW	AFF3	rs750520540	0	-	-	NR	none	NR	none
chr17:78265667	RNF213	C	T	0.03333	intron_variant	MODIFIER	RNF213	rs7503557	0	-	-	NR	none	NR	none
chr19:41762393	AXL	T	C	0.005556	synonymous_variant	LOW	AXL	rs750332848,COSM996979	0	-	-	NR	none	NR	none
chr7:151876974	MLL3	A	G	0.005556	missense_variant	MODERATE	KMT2C	rs750213944	0	deleterious(0)	possibly_damaging(0.791)	NR	none	NR	none
chr1:150551419	MCL1	C	T	0.005556	synonymous_variant	LOW	MCL1	rs75018646	0	-	-	NR	none	NR	none
chr6:135521414	MYB	C	A	0.01667	intron_variant	MODIFIER	MYB	rs750042379	0	-	-	NR	none	NR	none
chr7:98602714	TRRAP	T	G	0.005556	intron_variant	MODIFIER	TRRAP	rs74989787	0	-	-	NR	none	NR	none
chr6:152443821	SYNE1	T	G	0.005556	intron_variant	MODIFIER	SYNE1	rs749838365	0	-	-	NR	none	NR	none
chr7:55270249	EGFR	T	C	0.005556	stop_gained	HIGH	EGFR	rs749783044,COSM3266657	0	-	-	NR	PATHOGENIC	NR	Confirmed somatic variant		1		1
chr19:10599970	KEAP1	A	G	0.005556	missense_variant	MODERATE	KEAP1	rs749651891	0	tolerated(0.11)	benign(0.357)	NR	none	NR	none
chr16:3823822	CREBBP	C	T	0.005556	missense_variant	MODERATE	CREBBP	rs749642688	0	deleterious(0.01)	probably_damaging(0.972)	NR	none	NR	none
chr12:43819434	ADAMTS20	-	A	0.01111	frameshift_variant	HIGH	ADAMTS20	rs749250230	0	-	-	NR	none	NR	none
chr12:43860398	ADAMTS20	T	C	0.005556	intron_variant	MODIFIER	ADAMTS20	rs74913159	0	-	-	NR	none	NR	none
chr12:132490689	EP400	T	C	0.005556	missense_variant	MODERATE	EP400	rs748988067	0	tolerated(0.05)	benign(0)	NR	none	NR	none
chr15:40914795	CASC5	G	A	0.01111	missense_variant	MODERATE	CASC5	rs748968333	0	deleterious(0.03)	benign(0.294)	NR	none	NR	none
chr12:132539451	EP400	A	G	0.005556	intron_variant	MODIFIER	EP400	rs7488845	0	-	-	NR	none	NR	none
chr15:88680615	NTRK3	T	C	0.005556	intron_variant	MODIFIER	NTRK3	rs748777021	0	-	-	NR	none	NR	none
chr10:76788645	KAT6B	-	GAGGAG	0.005556	inframe_deletion	MODERATE	KAT6B	rs748773626,TMP_ESP_10_76788645_76788650	0	-	-	NR	none	NR	none
chr10:49634019	MAPK8	T	C	0.005556	synonymous_variant	LOW	MAPK8	rs748759491,COSM2144473,COSM2144474	0	-	-	NR	none	NR	Confirmed somatic variant				1
chr13:28635997	FLT3	T	C	0.005556	splice_region_variant,intron_variant	LOW	FLT3	rs748664578	0	-	-	NR	none	NR	none
chr6:152861052	SYNE1	T	G	0.005556	intron_variant	MODIFIER	SYNE1	rs74861532	0	-	-	NR	none	NR	none
chr12:121431559	HNF1A	A	G	0.005556	intron_variant	MODIFIER	HNF1A	rs748567045	0	-	-	NR	none	NR	none
chr16:23652402	PALB2	C	T	0.01111	intron_variant	MODIFIER	PALB2	rs748522775	0	-	-	NR	none	NR	none
chr2:29445412	ALK	T	C	0.005556	missense_variant	MODERATE	ALK	rs748493584	0	deleterious(0.01)	probably_damaging(0.949)	NR	none	NR	none
chr18:56367823	MALT1	G	A	0.01111	missense_variant,splice_region_variant	MODERATE	MALT1	rs74847855	0	tolerated(0.69)	benign(0)	NR	none	NR	none
chr7:106508919	PIK3CG	A	G	0.005556	missense_variant	MODERATE	PIK3CG	rs748229046,COSM3254577	0	deleterious(0.01)	benign(0.161)	NR	PATHOGENIC	NR	Confirmed somatic variant		1		1
chr6:393317	IRF4	A	G	0.005556	synonymous_variant	LOW	IRF4	rs748194946	0	-	-	NR	none	NR	none
chr1:6531589	PLEKHG5	T	C	0.09444	missense_variant	MODERATE	PLEKHG5	rs74809741	0	tolerated(0.42)	benign(0.014)	NR	none	NR	none
chr20:41100907	PTPRT	A	G	0.005556	splice_region_variant,synonymous_variant	LOW	PTPRT	rs747953256,COSM333175,COSM3389761	0	-	-	NR	none	NR	Confirmed somatic variant				1
chr2:141598681	LRP1B	C	A	0.06667	intron_variant	MODIFIER	LRP1B	rs74787922	0	-	-	NR	none	NR	none
chr4:55595672	KIT	-	TAGT	0.005556	intron_variant	MODIFIER	KIT	rs747770197	0	-	-	NR	none	NR	none
chr1:98157362	DPYD	A	G	0.005556	splice_region_variant,intron_variant	LOW	DPYD	rs74774246	0	-	-	NR	none	NR	none
chr6:160464209	IGF2R	A	G	0.005556	missense_variant	MODERATE	IGF2R	rs747686315	0	tolerated(0.4)	benign(0.068)	NR	none	NR	none
chr19:40741025	AKT2	T	C	0.005556	synonymous_variant	LOW	AKT2	rs747036690	0	-	-	NR	none	NR	none
chr14:105243046	AKT1	T	C	0.005556	synonymous_variant	LOW	AKT1	rs747020429	0	-	-	NR	none	NR	none
chr4:62812686	LPHN3	T	C	0.005556	missense_variant	MODERATE	LPHN3	rs746668174,COSM124145,COSM124146	0	deleterious(0)	probably_damaging(0.999)	NR	none	NR	none
chr16:79628349	MAF	T	C	0.005556	3_prime_UTR_variant	MODIFIER	MAF	rs746468654	0	-	-	NR	none	NR	none
chr8:103291224	UBR5	G	C	0.01111	intron_variant	MODIFIER	UBR5	rs746295547	0	-	-	NR	none	NR	none
chr6:152551837	SYNE1	G	T	0.01667	missense_variant,splice_region_variant	MODERATE	SYNE1	rs746037945	0	-	possibly_damaging(0.729)	NR	none	NR	none
chr10:70446442	TET1	A	G	0.005556	synonymous_variant	LOW	TET1	rs745734269	0	-	-	NR	none	NR	none
chr6:160493913	IGF2R	A	G	0.01667	missense_variant	MODERATE	IGF2R	rs745408671,COSM320937,COSM5975888	0	tolerated(0.05)	benign(0.184)	NR	PATHOGENIC	NR	none		1
chr6:166952307	RPS6KA2	T	C	0.005556	intron_variant	MODIFIER	RPS6KA2	rs74503721	0	-	-	NR	none	NR	none
chr1:241663902	FH	A	T	0.005556	intron_variant	MODIFIER	FH	rs74405673	0	-	-	NR	none	NR	none
chr15:74328206	PML	C	G	0.02778	intron_variant	MODIFIER	PML	rs743582,CM097806	0	-	-	NR	none	NR	none
chr15:74328141	PML	T	G	0.02778	intron_variant	MODIFIER	PML	rs743581	0	-	-	NR	none	NR	none
chr15:74328116	PML	G	A	0.05556	intron_variant	MODIFIER	PML	rs743580	0	-	-	NR	none	NR	none
chr3:138665029	FOXL2	C	G	0.005556	missense_variant	MODERATE	FOXL2	rs7432551,COSM4600643	0	tolerated_low_confidence(0.17)	benign(0.369)	NR	none	NR	none
chr1:45796899	MUTYH	G	C	0.01111	synonymous_variant	LOW	MUTYH	rs74318065,CM065323	0	-	-	NR	none	NR	none
chr10:97956830	BLNK	A	T	0.01111	intron_variant	MODIFIER	BLNK	rs74151283	0	-	-	NR	none	NR	none
chr1:145530254	ITGA10	T	C	0.1444	intron_variant	MODIFIER	ITGA10	rs74119688	0	-	-	NR	none	NR	none
chr1:120491618	NOTCH2	G	C	0.005556	intron_variant	MODIFIER	NOTCH2	rs74117573	0	-	-	NR	none	NR	none
chr19:3533274	FZR1	A	G	0.01111	intron_variant	MODIFIER	FZR1	rs740681	0	-	-	NR	none	NR	none
chr17:29663625	NF1	A	T	0.005556	intron_variant	MODIFIER	NF1	rs7406039	0	-	-	NR	none	NR	none
chr17:29670190	NF1	G	C	0.02778	intron_variant	MODIFIER	NF1	rs7405740	0	-	-	NR	none	NR	none
chr17:48275285	COL1A1	G	A	0.01667	intron_variant	MODIFIER	COL1A1	rs73987448	0	-	-	NR	none	NR	none
chr3:142257306	ATR	C	T	0.005556	intron_variant	MODIFIER	ATR	rs73864554	0	-	-	NR	none	NR	none
chr9:36966513	PAX5	A	G	0.005556	intron_variant	MODIFIER	PAX5	rs73648177	0	-	-	NR	none	NR	none
chr16:3827533	CREBBP	T	C	0.005556	intron_variant	MODIFIER	CREBBP	rs73501781	0	-	-	NR	none	NR	none
chr4:62800728	LPHN3	C	T	0.4944	synonymous_variant	LOW	LPHN3	rs734644,COSM4003110,COSM4003111,COSM4003112	0	-	-	NR	none	NR	none
chr18:22807723	ZNF521	A	G	0.005556	intron_variant	MODIFIER	ZNF521	rs73409111	0	-	-	NR	none	NR	none
chr13:28636084	FLT3	G	A	0.4944	synonymous_variant	LOW	FLT3	rs7338903,COSM6494233	0	-	-	NR	none	NR	none
chr14:81534709	TSHR	T	A	0.005556	intron_variant	MODIFIER	TSHR	rs73351678	0	-	-	NR	none	NR	none
chr12:49426878	MLL2	T	C	0.005556	missense_variant	MODERATE	KMT2D	rs73302195,COSM6494163	0	deleterious_low_confidence(0.01)	benign(0)	NR	none	NR	none
chr12:46205255	ARID2	C	A	0.005556	synonymous_variant	LOW	ARID2	rs73292513	0	-	-	NR	none	NR	none
chr13:28886113	FLT1	G	A	0.3389	intron_variant	MODIFIER	FLT1	rs7328692	0	-	-	NR	none	NR	none
chr1:226567008	PARP1	G	C	0.1222	intron_variant	MODIFIER	PARP1	rs732284	0	-	-	NR	none	NR	none
chr22:41572541	EP300	T	C	0.06667	intron_variant	MODIFIER	EP300	rs73176628	0	-	-	NR	none	NR	none
chr12:132562126	EP400	A	G	0.05	missense_variant	MODERATE	EP400	rs73164912	0	tolerated_low_confidence(0.23)	benign(0.01)	NR	none	NR	none
chr7:98513283	TRRAP	A	G	0.01667	intron_variant	MODIFIER	TRRAP	rs73155624	0	-	-	NR	none	NR	none
chr13:28610045	FLT3	C	T	0.005556	intron_variant	MODIFIER	FLT3	rs73154803	0	-	-	NR	none	NR	none
chr3:10088343	FANCD2	G	A	0.1444	missense_variant	MODERATE	FANCD2	rs73126218	0	tolerated(0.42)	benign(0.023)	NR	none	NR	none
chr12:43822171	ADAMTS20	A	G	0.005556	missense_variant	MODERATE	ADAMTS20	rs7310011	0	tolerated(0.74)	possibly_damaging(0.693)	NR	none	NR	none
chr3:12626080	RAF1	T	C	0.005556	missense_variant	MODERATE	RAF1	rs730881006,COSM4113115,COSM4113116	0	tolerated(0.07)	probably_damaging(0.999)	NR	PATHOGENIC	NR	Confirmed somatic variant		1		1
chr11:532635	HRAS	A	G	0.005556	3_prime_UTR_variant	MODIFIER	HRAS	rs730880327	0	-	-	NR	none	NR	none
chr12:43846272	ADAMTS20	T	C	0.4889	intron_variant	MODIFIER	ADAMTS20	rs7307955	0	-	-	NR	none	NR	none
chr1:6529443	PLEKHG5	G	A	0.05	synonymous_variant	LOW	PLEKHG5	rs730600	0	-	-	NR	none	NR	none
chr19:41759474	AXL	T	C	0.005556	intron_variant	MODIFIER	AXL	rs73045223	0	-	-	NR	none	NR	none
chr12:43828141	ADAMTS20	A	T	0.005556	missense_variant	MODERATE	ADAMTS20	rs7302446	0	deleterious(0.01)	benign(0.349)	NR	none	NR	none
chr12:43826204	ADAMTS20	T	C	0.005556	missense_variant	MODERATE	ADAMTS20	rs7297737	0	tolerated(0.16)	benign(0.03)	NR	none	NR	none
chr12:46245077	ARID2	A	G	0.01667	synonymous_variant	LOW	ARID2	rs7296694	0	-	-	NR	none	NR	none
chr3:52620714	PBRM1	T	G	0.005556	intron_variant	MODIFIER	PBRM1	rs72947594,COSM6494889	0	-	-	NR	none	NR	none
chr2:141232800	LRP1B	T	C	0.005556	missense_variant	MODERATE	LRP1B	rs72899872,COSM5019598	0	deleterious(0)	probably_damaging(0.989)	NR	PATHOGENIC	NR	Confirmed somatic variant		1		1
chr3:47163343	SETD2	C	G	0.005556	missense_variant	MODERATE	SETD2	rs72895708	0	tolerated_low_confidence(0.29)	benign(0.01)	NR	none	NR	none
chr17:78272294	RNF213	T	C	0.02222	missense_variant	MODERATE	RNF213	rs72849841	0	tolerated(0.06)	benign(0.007)	NR	none	NR	none
chr10:104161168	NFKB2	A	G	0.005556	intron_variant	MODIFIER	NFKB2	rs72845693	0	-	-	NR	none	NR	none
chr17:29563085	NF1	G	T	0.02778	intron_variant	MODIFIER	NF1	rs72813695	0	-	-	NR	none	NR	none
chr10:70406518	TET1	T	A	0.01111	synonymous_variant	LOW	TET1	rs72799516	0	-	-	NR	none	NR	none
chr10:97990583	BLNK	G	A	0.005556	synonymous_variant	LOW	BLNK	rs727852	0	-	-	NR	none	NR	none
chr9:134072817	NUP214	T	C	0.005556	synonymous_variant	LOW	NUP214	rs72768590	0	-	-	NR	none	NR	none
chr12:49425051	MLL2	A	C	0.005556	synonymous_variant	LOW	KMT2D	rs727503981	0	-	-	NR	none	NR	none
chr19:11170839	SMARCA4	C	T	0.1444	synonymous_variant	LOW	SMARCA4	rs7275,COSM1390291	0	-	-	NR	none	NR	none
chr5:7869235	MTRR	C	T	0.02778	5_prime_UTR_variant	MODIFIER	MTRR	rs72716536	0	-	-	NR	none	NR	none
chr9:8497250	PTPRD	C	T	0.005556	missense_variant	MODERATE	PTPRD	rs72694737	0	tolerated(0.78)	benign(0.01)	NR	none	NR	none
chr8:103273341	UBR5	C	T	0.03333	intron_variant	MODIFIER	UBR5	rs72681163	0	-	-	NR	none	NR	none
chr7:50468334	IKZF1	T	C	0.03333	3_prime_UTR_variant	MODIFIER	IKZF1	rs72645704	0	-	-	NR	none	NR	none
chr8:41798330	KAT6A	A	G	0.03333	intron_variant	MODIFIER	KAT6A	rs72640388	0	-	-	NR	none	NR	none
chr19:30314666	CCNE1	T	C	0.1111	synonymous_variant	LOW	CCNE1	rs7257694	0	-	-	NR	none	NR	none
chr8:90955519	NBN	C	T	0.005556	missense_variant	MODERATE	NBN	rs72563785	0	deleterious(0.03)	benign(0.212)	NR	none	NR	none
chr19:3110098	GNA11	A	G	0.005556	intron_variant	MODIFIER	GNA11	rs7255425	0	-	-	NR	none	NR	none
chr4:55597987	KIT	T	C	0.005556	intron_variant	MODIFIER	KIT	rs72549295	0	-	-	NR	none	NR	none
chr4:55575593	KIT	T	C	0.005556	synonymous_variant	LOW	KIT	rs72549293,COSM6005552	0	-	-	NR	none	NR	Confirmed somatic variant				1
chr3:10088308	FANCD2	C	T	0.3278	synonymous_variant	LOW	FANCD2	rs72492998	0	-	-	NR	none	NR	none
chr3:10088266	FANCD2	T	G	0.2611	splice_region_variant,synonymous_variant	LOW	FANCD2	rs72492997	0	-	-	NR	none	NR	none
chr19:41743861	AXL	G	A	0.3	missense_variant	MODERATE	AXL	rs7249222	0	tolerated(1)	benign(0)	NR	none	NR	none
chr2:42396722	EML4	G	A	0.01111	5_prime_UTR_variant	MODIFIER	EML4	rs7233	0	-	-	NR	none	NR	none
chr17:5442924	NLRP1	T	C	0.01111	intron_variant	MODIFIER	NLRP1	rs7223362	0	-	-	NR	none	NR	none
chr17:78323757	RNF213	C	T	0.07778	intron_variant	MODIFIER	RNF213	rs7223115	0	-	-	NR	none	NR	none
chr17:78327358	RNF213	A	G	0.4778	synonymous_variant	LOW	RNF213	rs7216493	0	-	-	NR	none	NR	none
chr17:5440221	NLRP1	C	T	0.07222	synonymous_variant	LOW	NLRP1	rs7215868	0	-	-	NR	none	NR	none
chr17:5440197	NLRP1	C	T	0.07222	synonymous_variant	LOW	NLRP1	rs7215856	0	-	-	NR	none	NR	none
chr16:89836323	FANCA	T	C	0.25	missense_variant	MODERATE	FANCA	rs7195066	0	tolerated(0.31)	benign(0)	NR	none	NR	none
chr16:15817995	MYH11	A	G	0.005556	intron_variant	MODIFIER	MYH11	rs7193920	0	-	-	NR	none	NR	none
chr10:76781906	KAT6B	-	GAA	0.15	inframe_deletion	MODERATE	KAT6B	rs71929101,COSM111693	0	-	-	NR	none	NR	none
chr16:89866043	FANCA	C	T	0.08333	missense_variant	MODERATE	FANCA	rs7190823,CM137879	0	tolerated(1)	benign(0)	NR	none	NR	none
chr11:32452092	WT1	-	GC	0.01111	intron_variant	MODIFIER	WT1	rs71873106	0	-	-	NR	none	NR	none
chr15:40898643	CASC5	C	G	0.02222	missense_variant	MODERATE	CASC5	rs7177192	0	tolerated(0.56)	benign(0)	NR	none	NR	none
chr11:69466115	CCND1	A	C	0.01111	3_prime_UTR_variant	MODIFIER	CCND1	rs7177	0	-	-	NR	none	NR	none
chr15:99251356	IGF1R	T	C	0.09444	intron_variant	MODIFIER	IGF1R	rs7174918	0	-	-	NR	none	NR	none
chrX:152483030	MAGEA1	A	G	0.008	5_prime_UTR_variant	MODIFIER	MAGEA1	rs717105	0	-	-	NR	none	NR	none
chr15:39876412	THBS1	T	C	0.1722	intron_variant	MODIFIER	THBS1	rs7170682	0	-	-	NR	none	NR	none
chr15:40453430	BUB1B	T	G	0.01111	synonymous_variant	LOW	BUB1B	rs7168394	0	-	-	NR	none	NR	none
chr15:91354521	BLM	A	G	0.005556	missense_variant	MODERATE	BLM	rs7167216,COSM4416980,COSM6926499	0	tolerated(0.33)	benign(0.003)	NR	none	NR	Confirmed somatic variant				1
chr1:144921924	PDE4DIP	A	G	0.07778	synonymous_variant	LOW	PDE4DIP	rs71664015	0	-	-	NR	none	NR	none
chr1:144881666	PDE4DIP	A	C	0.03333	intron_variant	MODIFIER	PDE4DIP	rs71664012	0	-	-	NR	none	NR	none
chr1:144880864	PDE4DIP	A	T	0.07222	splice_region_variant,intron_variant	LOW	PDE4DIP	rs71664011	0	-	-	NR	none	NR	none
chr1:144875979	PDE4DIP	C	G	0.1389	splice_region_variant,synonymous_variant	LOW	PDE4DIP	rs71664005	0	-	-	NR	none	NR	none
chr1:114951390	TRIM33	A	T	0.1556	intron_variant	MODIFIER	TRIM33	rs71662879	0	-	-	NR	none	NR	none
chr3:37512646	ITGA9	CC	TG	0.1333	intron_variant	MODIFIER	ITGA9	rs71635841	0	-	-	NR	none	NR	none
chr5:38528970	LIFR	-	ACACACACACAG	0.005556	intron_variant	MODIFIER	LIFR	rs71604901,TMP_ESP_5_38528970_38528987	0	-	-	NR	none	NR	none
chr14:92482254	TRIP11	C	T	0.02222	intron_variant	MODIFIER	TRIP11	rs7158303	0	-	-	NR	none	NR	none
chr6:152660451	SYNE1	A	G	0.02222	synonymous_variant	LOW	SYNE1	rs71575926	0	-	-	NR	none	NR	none
chr6:117631464	ROS1	TAA	-	0.15	intron_variant	MODIFIER	ROS1	rs71554877,TMP_ESP_6_117631464_117631466	0	-	-	NR	none	NR	none
chr7:14017007	ETV1	TG	CC	0.07222	intron_variant	MODIFIER	ETV1	rs71523042	0	-	-	NR	none	NR	none
chr14:92478198	TRIP11	G	A	0.03333	intron_variant	MODIFIER	TRIP11	rs7151632	0	-	-	NR	none	NR	none
chr14:81574816	TSHR	C	G	0.01111	intron_variant	MODIFIER	TSHR	rs7148964	0	-	-	NR	none	NR	none
chr12:132549300	EP400	G	A	0.01667	missense_variant	MODERATE	EP400	rs7136109	0	tolerated_low_confidence(0.75)	benign(0.046)	NR	none	NR	none
chr12:132508389	EP400	G	A	0.1444	synonymous_variant	LOW	EP400	rs7133119	0	-	-	NR	none	NR	none
chr7:126079144	GRM8	G	A	0.2556	3_prime_UTR_variant	MODIFIER	GRM8	rs712723	0	-	-	NR	none	NR	none
chr11:95713024	MAML2	A	G	0.09444	synonymous_variant	LOW	MAML2	rs7123272	0	-	-	NR	none	NR	none
chr11:95712897	MAML2	T	G	0.06667	missense_variant	MODERATE	MAML2	rs7123133	0	tolerated(0.91)	benign(0.031)	NR	none	NR	none
chr1:144863401	PDE4DIP	C	T	0.07222	missense_variant	MODERATE	PDE4DIP	rs71225704	0	deleterious(0)	probably_damaging(0.997)	NR	none	NR	none
chr11:128675292	FLI1	A	T	0.005556	synonymous_variant	LOW	FLI1	rs7113191	0	-	-	NR	none	NR	none
chr11:118368665	MLL	G	A	0.01667	synonymous_variant	LOW	KMT2A	rs7107305	0	-	-	NR	none	NR	none
chr12:69233634	MDM2	T	C	0.005556	3_prime_UTR_variant	MODIFIER	MDM2	rs710633	0	-	-	NR	none	NR	none
chr22:36691607	MYH9	C	A	0.03333	synonymous_variant	LOW	MYH9	rs710181	0	-	-	NR	none	NR	none
chr8:90967711	NBN	G	A	0.2778	synonymous_variant	LOW	NBN	rs709816	0	-	-	NR	none	NR	none
chr10:88683122	BMPR1A	C	T	0.2222	intron_variant	MODIFIER	BMPR1A	rs7074064	0	-	-	NR	none	NR	none
chr5:67522722	PIK3R1	T	C	0.1222	synonymous_variant	LOW	PIK3R1	rs706713,COSM4407349,COSM5490676	0	-	-	NR	none	NR	Confirmed somatic variant				1
chr9:8454566	PTPRD	C	T	0.3333	intron_variant	MODIFIER	PTPRD	rs7031287	0	-	-	NR	none	NR	none
chr9:8518143	PTPRD	C	T	0.08889	synonymous_variant	LOW	PTPRD	rs7026388	0	-	-	NR	none	NR	none
chr8:113363511	CSMD3	C	T	0.01111	intron_variant	MODIFIER	CSMD3	rs7003500	0	-	-	NR	none	NR	none
chr8:113363350	CSMD3	C	T	0.005556	intron_variant	MODIFIER	CSMD3	rs7003308	0	-	-	NR	none	NR	none
chr8:48776189	PRKDC	T	C	0.04444	intron_variant	MODIFIER	PRKDC	rs6993483	0	-	-	NR	none	NR	none
chr12:57911160	DDIT3	A	G	0.05556	synonymous_variant	LOW	DDIT3	rs697221	0	-	-	NR	none	NR	none
chr7:142564854	EPHB6	A	G	0.01111	intron_variant	MODIFIER	EPHB6	rs6971720	0	-	-	NR	none	NR	none
chr7:92734983	SAMD9	G	A	0.06667	missense_variant	MODERATE	SAMD9	rs6969691	0	tolerated(0.66)	benign(0)	NR	none	NR	none
chr7:98522893	TRRAP	T	C	0.06111	splice_region_variant,intron_variant	LOW	TRRAP	rs6967096	0	-	-	NR	none	NR	none
chr7:92734451	SAMD9	G	A	0.1389	synonymous_variant	LOW	SAMD9	rs6965201	0	-	-	NR	none	NR	none
chr7:91630620	AKAP9	T	G	0.2611	missense_variant	MODERATE	AKAP9	rs6964587,CM064968	0	deleterious(0.05)	benign(0.003)	NR	none	NR	none
chr7:98479707	TRRAP	A	G	0.005556	intron_variant	MODIFIER	TRRAP	rs6963893	0	-	-	NR	none	NR	none
chr5:256509	SDHA	A	G	0.05556	missense_variant	MODERATE	SDHA	rs6962	0	tolerated_low_confidence(0.55)	benign(0.017)	NR	none	NR	none
chr5:256472	SDHA	A	G	0.06111	synonymous_variant	LOW	SDHA	rs6961	0	-	-	NR	none	NR	none
chr7:91712698	AKAP9	G	A	0.2944	missense_variant	MODERATE	AKAP9	rs6960867	0	tolerated(0.71)	benign(0.001)	NR	none	NR	none
chr9:135978153	RALGDS	C	G	0.06667	intron_variant	MODIFIER	RALGDS	rs694881	0	-	-	NR	none	NR	none
chr7:2976767	CARD11	A	G	0.05	synonymous_variant	LOW	CARD11	rs6945582,COSM4162140	0	-	-	NR	none	NR	Confirmed somatic variant				1
chr7:142566163	EPHB6	G	C	0.3556	intron_variant	MODIFIER	EPHB6	rs6944571	0	-	-	NR	none	NR	none
chr6:152694184	SYNE1	C	T	0.1	synonymous_variant	LOW	SYNE1	rs6913579	0	-	-	NR	none	NR	none
chr6:152652034	SYNE1	T	A	0.07778	missense_variant	MODERATE	SYNE1	rs6911096	0	-	benign(0)	NR	none	NR	none
chr6:51947257	PKHD1	A	G	0.1222	synonymous_variant	LOW	PKHD1	rs6901799	0	-	-	NR	none	NR	none
chr9:135978378	RALGDS	C	T	0.06667	intron_variant	MODIFIER	RALGDS	rs686346	0	-	-	NR	none	NR	none
chr4:106155751	TET2	A	G	0.05556	missense_variant	MODERATE	TET2	rs6843141,COSM4416140	0	tolerated(1)	benign(0)	NR	none	NR	none
chr18:59157764	CDH20	C	T	0.04444	5_prime_UTR_variant	MODIFIER	CDH20	rs680530	0	-	-	NR	none	NR	none
chr3:52712459	PBRM1	C	T	0.01111	intron_variant	MODIFIER	PBRM1	rs6796577	0	-	-	NR	none	NR	none
chr1:144859720	PDE4DIP	C	G	0.03889	intron_variant	MODIFIER	PDE4DIP	rs678786	0	-	-	NR	none	NR	none
chr2:42510018	EML4	A	G	0.2556	missense_variant	MODERATE	EML4	rs6736913	0	tolerated(1)	benign(0)	NR	none	NR	none
chr1:120458004	NOTCH2	T	A	0.03889	synonymous_variant	LOW	NOTCH2	rs6685892,COSM5019691	0	-	-	NR	none	NR	Confirmed somatic variant				1
chr1:186319580	TPR	A	C	0.05	intron_variant	MODIFIER	TPR	rs6667940	0	-	-	NR	none	NR	none
chr17:48269390	COL1A1	C	G	0.005556	splice_region_variant,intron_variant	LOW	COL1A1	rs66592376,CD071303,CS063264	0	-	-	NR	none	NR	none
chr1:237013551	MTR	A	T	0.01667	intron_variant	MODIFIER	MTR	rs6658027	0	-	-	NR	none	NR	none
chr22:23656148	BCR	G	T	0.03889	splice_region_variant,intron_variant	LOW	BCR	rs66569843	0	-	-	NR	none	NR	none
chr1:144915624	PDE4DIP	-	G	0.01111	frameshift_variant	HIGH	PDE4DIP	rs66512216,COSM7255521,COSM7255522,COSM7255523,COSM7255524,COSM7255525	0	-	-	NR	none	NR	none
chr6:138197331	TNFAIP3	C	A	0.3444	intron_variant	MODIFIER	TNFAIP3	rs661561	0	-	-	NR	none	NR	none
chrX:44833841	KDM6A	A	C	0.12	intron_variant	MODIFIER	KDM6A	rs6611055	0	-	-	NR	none	NR	none
chr11:108183167	ATM	G	A	0.02222	missense_variant	MODERATE	ATM	rs659243,COSM4590264	0	tolerated(1)	benign(0)	NR	none	NR	none
chr1:145016020	PDE4DIP	G	T	0.3111	upstream_gene_variant	MODIFIER	RP11-326G21.1	rs657162	0	-	-	NR	none	NR	none
chr17:78298938	RNF213	A	G	0.2611	missense_variant	MODERATE	RNF213	rs6565674	0	tolerated(1)	benign(0)	NR	none	NR	none
chr17:78292945	RNF213	A	G	0.1	intron_variant	MODIFIER	RNF213	rs6565666	0	-	-	NR	none	NR	none
chr5:226264	SDHA	T	C	0.005556	intron_variant	MODIFIER	SDHA	rs6555057	0	-	-	NR	none	NR	none
chr5:226222	SDHA	C	T	0.005556	intron_variant	MODIFIER	SDHA	rs6555056	0	-	-	NR	none	NR	none
chr5:226160	SDHA	C	A	0.01111	splice_region_variant,synonymous_variant	LOW	SDHA	rs6555055	0	-	-	NR	none	NR	none
chr1:114948281	TRIM33	G	A	0.05556	missense_variant	MODERATE	TRIM33	rs6537825	0	tolerated(1)	benign(0)	NR	none	NR	none
chr16:89858505	FANCA	C	T	0.1	intron_variant	MODIFIER	FANCA	rs6500452	0	-	-	NR	none	NR	none
chr8:103372743	UBR5	A	G	0.07778	intron_variant	MODIFIER	UBR5	rs6468823	0	-	-	NR	none	NR	none
chr8:37686749	GPR124	G	A	0.04444	intron_variant	MODIFIER	GPR124	rs6468442	0	-	-	NR	none	NR	none
chr7:142566371	EPHB6	T	C	0.005556	synonymous_variant	LOW	EPHB6	rs6464535	0	-	-	NR	none	NR	none
chr7:151873853	MLL3	T	C	0.1611	synonymous_variant	LOW	KMT2C	rs6464211,COSM3762512	0	-	-	NR	none	NR	none
chr6:56482801	DST	G	C	0.2611	intron_variant	MODIFIER	DST	rs6459166	0	-	-	NR	none	NR	none
chr11:94197260	MRE11A	G	A	0.3556	intron_variant	MODIFIER	MRE11A	rs641936	0	-	-	NR	none	NR	none
chr1:144909956	PDE4DIP	A	G	0.1111	synonymous_variant	LOW	PDE4DIP	rs638260	0	-	-	NR	none	NR	none
chr3:37067449	MLH1	C	G	0.005556	missense_variant	MODERATE	MLH1	rs63750527,CM068363,COSM6931646	0	tolerated(0.2)	benign(0)	NR	none	NR	Confirmed somatic variant				1
chr3:37090407	MLH1	A	G	0.005556	missense_variant	MODERATE	MLH1	rs63750292,COSM6574661	0	tolerated(0.3)	benign(0.006)	NR	PATHOGENIC	NR	Confirmed somatic variant		1		1
chr3:134644636	EPHB1	T	G	0.2	intron_variant	MODIFIER	EPHB1	rs635721	0	-	-	NR	none	NR	none
chr1:156848946	NTRK1	T	G	0.005556	missense_variant	MODERATE	NTRK1	rs6339,CM990978	0	tolerated(0.06)	benign(0.129)	NR	none	NR	none
chr1:156848995	NTRK1	T	C	0.06111	synonymous_variant	LOW	NTRK1	rs6337	0	-	-	NR	none	NR	none
chr1:156848918	NTRK1	T	C	0.005556	missense_variant	MODERATE	NTRK1	rs6336,CM990977	0	deleterious(0)	possibly_damaging(0.808)	NR	none	NR	none
chr1:156846233	NTRK1	A	G	0.05556	synonymous_variant	LOW	NTRK1	rs6334	0	-	-	NR	none	NR	none
chr6:160494409	IGF2R	A	G	0.2389	missense_variant	MODERATE	IGF2R	rs629849	0	tolerated(1)	benign(0)	NR	none	NR	none
chr1:182551337	RNASEL	C	A	0.1556	missense_variant	MODERATE	RNASEL	rs627928,CM034674	0	tolerated(1)	benign(0)	NR	none	NR	none
chr1:6529188	PLEKHG5	T	C	0.05556	synonymous_variant	LOW	PLEKHG5	rs62639695	0	-	-	NR	none	NR	none
chr10:70450923	TET1	T	C	0.01667	synonymous_variant	LOW	TET1	rs62638664	0	-	-	NR	none	NR	none
chr16:23614913	PALB2	T	A	0.005556	missense_variant	MODERATE	PALB2	rs62625284,CM113953	0	deleterious(0)	possibly_damaging(0.861)	NR	none	NR	none
chr4:106197000	TET2	G	A	0.03889	missense_variant	MODERATE	TET2	rs62621450,COSM6494955	0	deleterious(0.01)	possibly_damaging(0.551)	NR	none	NR	none
chr7:140476936	BRAF	A	G	0.05	intron_variant	MODIFIER	BRAF	rs62487918	0	-	-	NR	none	NR	none
chr7:151962257	MLL3	T	C	0.08889	synonymous_variant	LOW	KMT2C	rs62478357,COSM4909142	0	-	-	NR	none	NR	none
chr7:6038722	PMS2	C	T	0.2167	intron_variant	MODIFIER	PMS2	rs62456182	0	-	-	NR	none	NR	none
chr6:93965492	EPHA7	A	G	0.02222	intron_variant	MODIFIER	EPHA7	rs62414217	0	-	-	NR	none	NR	none
chr6:51938210	PKHD1	A	C	0.02222	intron_variant	MODIFIER	PKHD1	rs62406055	0	-	-	NR	none	NR	none
chr6:51921703	PKHD1	G	A	0.01667	synonymous_variant	LOW	PKHD1	rs62406036	0	-	-	NR	none	NR	none
chr3:142287047	ATR	A	T	0.01111	intron_variant	MODIFIER	ATR	rs62276447	0	-	-	NR	none	NR	none
chr2:29551161	ALK	A	G	0.05	intron_variant	MODIFIER	ALK	rs62130643	0	-	-	NR	none	NR	none
chr19:1611856	TCF3	A	G	0.03889	splice_region_variant,intron_variant	LOW	TCF3	rs62130064	0	-	-	NR	none	NR	none
chr19:11129600	SMARCA4	T	C	0.01111	intron_variant	MODIFIER	SMARCA4	rs62129061	0	-	-	NR	none	NR	none
chr18:59203707	CDH20	A	G	0.1556	intron_variant	MODIFIER	CDH20	rs62097360	0	-	-	NR	none	NR	none
chr17:78351506	RNF213	G	A	0.005556	intron_variant	MODIFIER	RNF213	rs62077765	0	-	-	NR	none	NR	none
chr17:78346870	RNF213	A	C	0.005556	missense_variant	MODERATE	RNF213	rs62077764	0	tolerated(0.38)	benign(0.054)	NR	none	NR	none
chr12:43840370	ADAMTS20	A	G	0.05	intron_variant	MODIFIER	ADAMTS20	rs61925148	0	-	-	NR	none	NR	none
chr6:117622184	ROS1	C	G	0.04444	missense_variant	MODERATE	ROS1	rs619203,CM053397	0	tolerated(0.37)	benign(0)	NR	none	NR	none
chr11:128350071	ETS1	T	C	0.01111	intron_variant	MODIFIER	ETS1	rs61909072	0	-	-	NR	none	NR	none
chr11:128391937	ETS1	T	C	0.01111	intron_variant	MODIFIER	ETS1	rs61907765	0	-	-	NR	none	NR	none
chr11:3800096	NUP98	T	C	0.01667	splice_region_variant,intron_variant	LOW	NUP98	rs61896892	0	-	-	NR	none	NR	none
chr11:3735239	NUP98	T	C	0.01111	intron_variant	MODIFIER	NUP98	rs61879797	0	-	-	NR	none	NR	none
chr1:17371221	SDHB	T	C	0.02222	intron_variant	MODIFIER	SDHB	rs61769190	0	-	-	NR	none	NR	none
chr13:29001430	FLT1	A	G	0.01111	synonymous_variant	LOW	FLT1	rs61763178	0	-	-	NR	none	NR	none
chr1:204423811	PIK3C2B	A	G	0.005556	synonymous_variant	LOW	PIK3C2B	rs61762608	0	-	-	NR	none	NR	none
chr1:204426183	PIK3C2B	A	C	0.005556	missense_variant	MODERATE	PIK3C2B	rs61762602	0	tolerated(0.54)	benign(0)	NR	none	NR	none
chr13:28893688	FLT1	A	G	0.005556	intron_variant	MODIFIER	FLT1	rs61762459	0	-	-	NR	none	NR	none
chr1:204438708	PIK3C2B	A	G	0.005556	missense_variant	MODERATE	PIK3C2B	rs61761687	0	tolerated_low_confidence(0.07)	benign(0.165)	NR	none	NR	none
chr14:105238820	AKT1	C	G	0.005556	intron_variant	MODIFIER	AKT1	rs61761201	0	-	-	NR	none	NR	none
chr8:113277705	CSMD3	A	T	0.01667	missense_variant	MODERATE	CSMD3	rs61759499	0	tolerated(0.21)	possibly_damaging(0.74)	NR	none	NR	none
chr7:91715609	AKAP9	G	A	0.005556	missense_variant	MODERATE	AKAP9	rs61757673	0	tolerated(0.29)	benign(0.066)	NR	none	NR	none
chr7:91726960	AKAP9	A	G	0.01111	missense_variant	MODERATE	AKAP9	rs61757664	0	deleterious(0.04)	possibly_damaging(0.831)	NR	none	NR	none
chr2:47698108	MSH2	C	T	0.01111	synonymous_variant	LOW	MSH2	rs61756466,CM036021,COSM5020835	0	-	-	NR	PATHOGENIC	NR	Confirmed somatic variant		1		1
chr9:134027138	NUP214	G	A	0.005556	missense_variant	MODERATE	NUP214	rs61756081	0	tolerated(0.07)	probably_damaging(0.994)	NR	none	NR	none
chr12:43833739	ADAMTS20	G	A	0.01111	synonymous_variant	LOW	ADAMTS20	rs61754845	0	-	-	NR	none	NR	none
chr8:113347559	CSMD3	A	G	0.05	splice_region_variant,synonymous_variant	LOW	CSMD3	rs61754528,COSM3395069,COSM3395070	0	-	-	NR	none	NR	Confirmed somatic variant				1
chr16:3831230	CREBBP	T	G	0.04444	missense_variant	MODERATE	CREBBP	rs61753381	0	tolerated(0.08)	benign(0.369)	NR	none	NR	none
chr17:5461895	NLRP1	A	C	0.01111	synonymous_variant	LOW	NLRP1	rs61753137	0	-	-	NR	none	NR	none
chr17:5461847	NLRP1	A	G	0.005556	synonymous_variant	LOW	NLRP1	rs61753136	0	-	-	NR	none	NR	none
chr8:103311153	UBR5	T	C	0.005556	synonymous_variant	LOW	UBR5	rs61752302	0	-	-	NR	none	NR	none
chr3:187447701	BCL6	A	C	0.01111	missense_variant	MODERATE	BCL6	rs61752081	0	tolerated(0.36)	benign(0.003)	NR	none	NR	none
chr3:65346893	MAGI1	A	G	0.005556	synonymous_variant	LOW	MAGI1	rs61751923	0	-	-	NR	none	NR	none
chr3:37560842	ITGA9	G	A	0.005556	synonymous_variant	LOW	ITGA9	rs61751646	0	-	-	NR	none	NR	none
chr1:147090956	BCL9	T	C	0.005556	missense_variant	MODERATE	BCL9	rs61751616	0	tolerated(0.3)	benign(0)	NR	none	NR	none
chr9:134020086	NUP214	G	A	0.01667	missense_variant	MODERATE	NUP214	rs61751470	0	tolerated(0.4)	benign(0.001)	NR	none	NR	none
chr11:3752727	NUP98	G	T	0.005556	synonymous_variant	LOW	NUP98	rs61751339	0	-	-	NR	none	NR	none
chr3:138665064	FOXL2	A	G	0.005556	synonymous_variant	LOW	FOXL2	rs61750361,CP015788	0	-	-	NR	none	NR	none
chr17:17119761	FLCN	T	C	0.01667	synonymous_variant	LOW	FLCN	rs61750032	0	-	-	NR	none	NR	none
chr5:176707724	NSD1	G	C	0.02778	synonymous_variant	LOW	NSD1	rs61749654	0	-	-	NR	none	NR	none
chr5:67575548	PIK3R1	C	T	0.005556	synonymous_variant	LOW	PIK3R1	rs61749601,COSM5019326	0	-	-	NR	PATHOGENIC	NR	Confirmed somatic variant		1		1
chr20:40827934	PTPRT	T	C	0.005556	missense_variant	MODERATE	PTPRT	rs61749502	0	tolerated(1)	benign(0)	NR	none	NR	none
chr11:95825755	MAML2	C	G	0.02778	missense_variant	MODERATE	MAML2	rs61749251	0	tolerated(0.15)	benign(0.024)	NR	none	NR	none
chr1:204400886	PIK3C2B	A	G	0.005556	synonymous_variant	LOW	PIK3C2B	rs61748805	0	-	-	NR	none	NR	none
chr17:78354756	RNF213	T	C	0.01111	missense_variant	MODERATE	RNF213	rs61747138	0	deleterious(0)	possibly_damaging(0.79)	NR	none	NR	none
chr11:71717106	NUMA1	A	G	0.03889	synonymous_variant	LOW	NUMA1	rs61745941	0	-	-	NR	none	NR	none
chr17:78355494	RNF213	G	C	0.02778	missense_variant	MODERATE	RNF213	rs61745599,COSM5985418,COSM5985419	0	deleterious(0)	possibly_damaging(0.884)	NR	PATHOGENIC	NR	Confirmed somatic variant		1		1
chr4:106156163	TET2	A	G	0.01111	missense_variant	MODERATE	TET2	rs61744960,COSM6494926	0	deleterious(0.01)	benign(0.282)	NR	none	NR	none
chr1:186321242	TPR	T	C	0.03333	missense_variant,splice_region_variant	MODERATE	TPR	rs61744267	0	tolerated(0.15)	benign(0.437)	NR	none	NR	none
chr11:71718298	NUMA1	T	C	0.005556	synonymous_variant	LOW	NUMA1	rs61744213	0	-	-	NR	none	NR	none
chr6:117715395	ROS1	G	C	0.005556	missense_variant	MODERATE	ROS1	rs61743088	0	deleterious(0.02)	possibly_damaging(0.643)	NR	none	NR	none
chr12:123214372	HCAR1	A	G	0.01111	missense_variant	MODERATE	HCAR1	rs61742326,CM1212153,COSM4146769	0	tolerated(0.32)	benign(0.063)	NR	none	NR	none
chr1:145541460	ITGA10	T	C	0.01111	missense_variant	MODERATE	ITGA10	rs61741868	0	deleterious(0.01)	benign(0.011)	NR	none	NR	none
chr17:78335610	RNF213	A	G	0.01667	synonymous_variant	LOW	RNF213	rs61741791	0	-	-	NR	none	NR	none
chr11:47259417	DDB2	C	T	0.005556	synonymous_variant	LOW	DDB2	rs61741581	0	-	-	NR	none	NR	none
chr1:6533393	PLEKHG5	C	G	0.1556	missense_variant	MODERATE	PLEKHG5	rs61741379	0	tolerated(0.72)	benign(0)	NR	none	NR	none
chr17:78337584	RNF213	G	A	0.1	missense_variant	MODERATE	RNF213	rs61740658	0	tolerated(0.06)	benign(0.152)	NR	none	NR	none
chr3:46491985	LTF	T	C	0.005556	splice_region_variant,synonymous_variant	LOW	LTF	rs61740470	0	-	-	NR	none	NR	none
chr6:70071050	BAI3	T	C	0.005556	synonymous_variant	LOW	BAI3	rs61740403	0	-	-	NR	none	NR	none
chr3:65376943	MAGI1	G	T	0.005556	missense_variant	MODERATE	MAGI1	rs61740330	0	tolerated(0.41)	possibly_damaging(0.735)	NR	none	NR	none
chr3:46487937	LTF	T	C	0.01111	missense_variant	MODERATE	LTF	rs61739313	0	tolerated(0.11)	benign(0.284)	NR	none	NR	none
chr1:241667523	FH	T	C	0.1167	synonymous_variant	LOW	FH	rs61737760	0	-	-	NR	none	NR	none
chr15:90628591	IDH2	A	G	0.03333	synonymous_variant	LOW	IDH2	rs61737003,COSM4128570	0	-	-	NR	none	NR	Confirmed somatic variant				1
chr3:46490456	LTF	A	G	0.01111	synonymous_variant	LOW	LTF	rs61737000	0	-	-	NR	none	NR	none
chr11:64577147	MEN1	A	G	0.005556	synonymous_variant	LOW	MEN1	rs61736636,COSM22618,COSM5020099	0	-	-	NR	PATHOGENIC	NR	Confirmed somatic variant		1		1
chr9:134073898	NUP214	C	G	0.005556	missense_variant	MODERATE	NUP214	rs61735510	0	deleterious(0.03)	benign(0.022)	NR	none	NR	none
chr11:111959733	SDHD	T	C	0.005556	splice_region_variant,synonymous_variant	LOW	SDHD	rs61734352	0	-	-	NR	none	NR	none
chr7:148508780	EZH2	C	G	0.005556	synonymous_variant	LOW	EZH2	rs61732846	0	-	-	NR	none	NR	none
chr3:187443314	BCL6	A	G	0.04444	synonymous_variant	LOW	BCL6	rs61732778,COSM5817657	0	-	-	NR	PATHOGENIC	NR	Confirmed somatic variant		1		1
chr2:141272253	LRP1B	T	C	0.005556	synonymous_variant	LOW	LRP1B	rs61732738	0	-	-	NR	none	NR	none
chr7:50467767	IKZF1	A	C	0.02222	synonymous_variant	LOW	IKZF1	rs61731355	0	-	-	NR	none	NR	none
chrX:63410110	FAM123B	C	T	0.008	synonymous_variant	LOW	AMER1	rs61730681,COSM5019113	0	-	-	NR	none	NR	none
chr7:151873293	MLL3	A	G	0.005556	missense_variant	MODERATE	KMT2C	rs61730545,COSM3304066	0	deleterious(0)	probably_damaging(0.994)	NR	none	NR	none
chr7:151878993	MLL3	G	T	0.005556	synonymous_variant	LOW	KMT2C	rs61730539,COSM5021163	0	-	-	NR	none	NR	none
chr7:151884447	MLL3	T	C	0.01111	synonymous_variant	LOW	KMT2C	rs61730536	0	-	-	NR	none	NR	none
chr7:151896483	MLL3	C	T	0.01111	missense_variant	MODERATE	KMT2C	rs61730535	0	tolerated(0.27)	benign(0.001)	NR	none	NR	none
chr17:78321157	RNF213	C	T	0.04444	missense_variant	MODERATE	RNF213	rs61600413	0	tolerated(0.35)	benign(0.062)	NR	none	NR	none
chrX:66765627	AR	A	G	0.048	synonymous_variant	LOW	AR	rs6152,CM051843,COSM5019465,COSM5019466	0	-	-	NR	none	NR	none
chr6:160505199	IGF2R	C	G	0.3222	synonymous_variant	LOW	IGF2R	rs614754	0	-	-	NR	none	NR	none
chr17:78298926	RNF213	A	G	0.02778	missense_variant	MODERATE	RNF213	rs61359568	0	tolerated(0.58)	benign(0)	NR	none	NR	none
chr20:40713314	PTPRT	A	G	0.01111	splice_region_variant,intron_variant	LOW	PTPRT	rs6130030	0	-	-	NR	none	NR	none
chr11:3740588	NUP98	T	G	0.04444	intron_variant	MODIFIER	NUP98	rs612785	0	-	-	NR	none	NR	none
chr20:39794489	PLCG1	A	G	0.1222	intron_variant	MODIFIER	PLCG1	rs6124323	0	-	-	NR	none	NR	none
chr7:91713880	AKAP9	G	C	0.005556	intron_variant	MODIFIER	AKAP9	rs61144642	0	-	-	NR	none	NR	none
chr20:41408956	PTPRT	A	G	0.02778	intron_variant	MODIFIER	PTPRT	rs61105564	0	-	-	NR	none	NR	none
chr1:145015844	PDE4DIP	T	C	0.02778	upstream_gene_variant	MODIFIER	RP11-326G21.1	rs61018137	0	-	-	NR	none	NR	none
chr4:87968780	AFF1	C	T	0.01667	intron_variant	MODIFIER	AFF1	rs61009470	0	-	-	NR	none	NR	none
chr14:51192571	NIN	C	G	0.01667	3_prime_UTR_variant	MODIFIER	NIN	rs60995653	0	-	-	NR	none	NR	none
chr3:46496854	LTF	A	G	0.01111	missense_variant	MODERATE	LTF	rs60938611	0	tolerated(0.22)	benign(0.003)	NR	none	NR	none
chr1:185069315	RNF2	T	-	0.005556	intron_variant	MODIFIER	RNF2	rs60678736	0	-	-	NR	none	NR	none
chr20:31022959	ASXL1	C	T	0.03333	missense_variant	MODERATE	ASXL1	rs6058694,COSM6494657,COSM6908477,COSM6908478	0	tolerated_low_confidence(0.27)	benign(0)	NR	none	NR	none
chr6:152665303	SYNE1	T	C	0.005556	synonymous_variant	LOW	SYNE1	rs60344647	0	-	-	NR	none	NR	none
chr20:41514541	PTPRT	A	G	0.005556	synonymous_variant	LOW	PTPRT	rs6030543	0	-	-	NR	none	NR	none
chr15:43568794	TGM7	A	G	0.005556	synonymous_variant	LOW	TGM7	rs59900401	0	-	-	NR	none	NR	none
chrX:70595132	TAF1	C	T	0.008	synonymous_variant	LOW	TAF1	rs5981106	0	-	-	NR	none	NR	none
chr20:41514406	PTPRT	G	A	0.02222	intron_variant	MODIFIER	PTPRT	rs59601716	0	-	-	NR	none	NR	none
chr22:39636948	PDGFB	A	T	0.005556	intron_variant	MODIFIER	PDGFB	rs59590668	0	-	-	NR	none	NR	none
chrX:44966795	KDM6A	C	T	0.008	intron_variant	MODIFIER	KDM6A	rs5952682	0	-	-	NR	none	NR	none
chrX:44913052	KDM6A	A	T	0.032	intron_variant	MODIFIER	KDM6A	rs5952285	0	-	-	NR	none	NR	none
chr18:59170304	CDH20	G	C	0.2556	synonymous_variant	LOW	CDH20	rs595093	0	-	-	NR	none	NR	none
chr22:42523610	CYP2D6	T	C	0.005556	missense_variant	MODERATE	CYP2D6	rs59421388,CM016155	0	deleterious(0)	probably_damaging(0.984)	NR	none	NR	none
chr15:39882107	THBS1	T	C	0.005556	synonymous_variant	LOW	THBS1	rs59272325	0	-	-	NR	none	NR	none
chr17:45364540	ITGB3	C	T	0.05	synonymous_variant	LOW	ITGB3	rs5919	0	-	-	NR	none	NR	none
chrX:41043944	USP9X	C	T	0.008264	intron_variant	MODIFIER	USP9X	rs5918130	0	-	-	NR	none	NR	none
chr17:45360730	ITGB3	C	T	0.1333	missense_variant	MODERATE	ITGB3	rs5918,CM890078	0	tolerated(0.28)	benign(0.003)	NR	none	NR	none
chr11:95825941	MAML2	T	G	0.005556	synonymous_variant	LOW	MAML2	rs58982358	0	-	-	NR	none	NR	none
chr3:47163422	SETD2	G	C	0.01111	missense_variant	MODERATE	SETD2	rs58906143	0	deleterious_low_confidence(0)	possibly_damaging(0.69)	NR	none	NR	none
chr6:152711429	SYNE1	A	G	0.005556	synonymous_variant	LOW	SYNE1	rs58905396	0	-	-	NR	none	NR	none
chr11:108114774	ATM	T	A	0.005556	synonymous_variant	LOW	ATM	rs587780630	0	-	-	NR	none	NR	none
chr16:68863630	CDH1	T	C	0.005556	missense_variant	MODERATE	CDH1	rs587780120,COSM5833157	0	deleterious(0.02)	possibly_damaging(0.866)	NR	none	NR	none
chr1:120491029	NOTCH2	G	A	0.005556	splice_region_variant,intron_variant	LOW	NOTCH2	rs587621243	0	-	-	NR	none	NR	none
chr9:35074917	FANCG	C	T	0.05556	splice_region_variant,intron_variant	LOW	FANCG	rs587118	0	-	-	NR	none	NR	none
chr15:39881379	THBS1	A	T	0.01111	intron_variant	MODIFIER	THBS1	rs58677957	0	-	-	NR	none	NR	none
chr9:134003803	NUP214	T	C	0.005556	missense_variant	MODERATE	NUP214	rs58363837	0	tolerated(1)	benign(0.001)	NR	none	NR	none
chr12:132514288	EP400	G	C	0.01111	synonymous_variant	LOW	EP400	rs58319354	0	-	-	NR	none	NR	none
chr3:52662850	PBRM1	C	A	0.005556	intron_variant	MODIFIER	PBRM1	rs57869735	0	-	-	NR	none	NR	none
chr1:236988594	MTR	T	-	0.005556	intron_variant	MODIFIER	MTR	rs5781926,TMP_ESP_1_236988594_236988594	0	-	-	NR	none	NR	none
chr1:236978993	MTR	TCTG	-	0.2111	intron_variant	MODIFIER	MTR	rs5781924	0	-	-	NR	none	NR	none
chr10:104377292	SUFU	C	G	0.005556	intron_variant	MODIFIER	SUFU	rs576773637	0	-	-	NR	none	NR	none
chr22:39636930	PDGFB	G	A	0.02778	intron_variant	MODIFIER	PDGFB	rs5757576	0	-	-	NR	none	NR	none
chr22:39636928	PDGFB	G	A	0.02778	intron_variant	MODIFIER	PDGFB	rs5757575	0	-	-	NR	none	NR	none
chr22:36684331	MYH9	T	C	0.02778	synonymous_variant	LOW	MYH9	rs5756130	0	-	-	NR	none	NR	none
chr3:37695260	ITGA9	G	A	0.01111	missense_variant	MODERATE	ITGA9	rs57547208	0	tolerated(0.14)	benign(0.001)	NR	none	NR	none
chr22:24145675	SMARCB1	C	G	0.005556	intron_variant	MODIFIER	SMARCB1	rs5751738	0	-	-	NR	none	NR	none
chr22:23523630	BCR	A	C	0.25	synonymous_variant	LOW	BCR	rs5751602	0	-	-	NR	none	NR	none
chr7:138266529	TRIM24	A	G	0.005556	intron_variant	MODIFIER	TRIM24	rs574457955	0	-	-	NR	none	NR	none
chr2:190742172	PMS1	A	T	0.01111	3_prime_UTR_variant	MODIFIER	PMS1	rs5743199	0	-	-	NR	none	NR	none
chr15:74336633	PML	C	T	0.2556	missense_variant	MODERATE	PML	rs5742915	0	tolerated(0.81)	benign(0)	NR	none	NR	none
chr1:11293464	MTOR	C	T	0.005556	synonymous_variant	LOW	MTOR	rs573881829	0	-	-	NR	none	NR	none
chr10:76784992	KAT6B	T	G	0.01111	missense_variant	MODERATE	KAT6B	rs57372986	0	tolerated_low_confidence(0.67)	benign(0)	NR	none	NR	none
chr3:46486842	LTF	A	G	0.005556	synonymous_variant	LOW	LTF	rs573022414	0	-	-	NR	none	NR	none
chr11:102207681	BIRC3	C	A	0.005556	synonymous_variant	LOW	BIRC3	rs57261191	0	-	-	NR	none	NR	none
chr3:65422768	MAGI1	G	C	0.005556	intron_variant	MODIFIER	MAGI1	rs572512353	0	-	-	NR	none	NR	none
chr7:140534324	BRAF	-	AAGT	0.005556	intron_variant	MODIFIER	BRAF	rs571456666	0	-	-	NR	none	NR	none
chr6:152527386	SYNE1	T	C	0.005556	missense_variant	MODERATE	SYNE1	rs570265411,COSM1074710,COSM1074711,COSM1596087,COSM4864069,COSM4864070	0	-	possibly_damaging(0.643)	NR	PATHOGENIC	NR	Confirmed somatic variant		1		1
chr7:98508070	TRRAP	A	-	0.02778	intron_variant	MODIFIER	TRRAP	rs570123280	0	-	-	NR	none	NR	none
chr20:41514559	PTPRT	G	A	0.005556	synonymous_variant	LOW	PTPRT	rs569918568	0	-	-	NR	none	NR	none
chr2:42507962	EML4	-	ACTTA	0.005556	intron_variant	MODIFIER	EML4	rs569899355	0	-	-	NR	none	NR	none
chr15:40920731	CASC5	G	A	0.005556	intron_variant	MODIFIER	CASC5	rs569501922	0	-	-	NR	none	NR	none
chr6:152711406	SYNE1	A	G	0.02778	intron_variant	MODIFIER	SYNE1	rs56877632	0	-	-	NR	none	NR	none
chr17:5433841	NLRP1	G	A	0.02778	synonymous_variant	LOW	NLRP1	rs56872041	0	-	-	NR	none	NR	none
chr11:533404	HRAS	T	C	0.005556	intron_variant	MODIFIER	HRAS	rs568602129	0	-	-	NR	none	NR	none
chr7:151970931	MLL3	A	G	0.2889	missense_variant	MODERATE	KMT2C	rs56850341,COSM4591023	0	deleterious(0.03)	probably_damaging(0.999)	NR	none	NR	none
chr7:151851392	MLL3	T	C	0.01111	synonymous_variant	LOW	KMT2C	rs56753294,COSM5020218	0	-	-	NR	none	NR	none
chr15:43571390	TGM7	G	C	0.2944	synonymous_variant	LOW	TGM7	rs567357	0	-	-	NR	none	NR	none
chr8:114327077	CSMD3	G	A	0.005556	intron_variant	MODIFIER	CSMD3	rs567312329	0	-	-	NR	none	NR	none
chr17:37856542	ERBB2	A	C	0.005556	synonymous_variant	LOW	ERBB2	rs567022720	0	-	-	NR	none	NR	none
chr6:51890335	PKHD1	A	G	0.005556	missense_variant	MODERATE	PKHD1	rs565836750,COSM5586225,COSM5586226	0	deleterious(0.05)	benign(0.357)	NR	none	NR	none
chr1:65306948	JAK1	G	T	0.02222	synonymous_variant	LOW	JAK1	rs565648053	0	-	-	NR	none	NR	none
chr16:3900637	CREBBP	T	C	0.005556	synonymous_variant	LOW	CREBBP	rs56388626	0	-	-	NR	none	NR	none
chr3:134884880	EPHB1	T	C	0.005556	synonymous_variant	LOW	EPHB1	rs56372452	0	-	-	NR	none	NR	none
chr16:89838136	FANCA	C	T	0.005556	missense_variant	MODERATE	FANCA	rs56369086	0	tolerated(0.52)	benign(0.007)	NR	none	NR	none
chr5:180056863	FLT4	T	C	0.005556	intron_variant	MODIFIER	FLT4	rs56361806	0	-	-	NR	none	NR	none
chr19:1207176	STK11	A	C	0.005556	synonymous_variant	LOW	STK11	rs56354945,COSM1559505,COSM1559506,COSM6978896,COSM6978897	0	-	-	NR	PATHOGENIC	NR	none		1
chr9:32634633	TAF1L	G	A	0.005556	synonymous_variant	LOW	TAF1L	rs56351932	0	-	-	NR	none	NR	none
chr12:121432117	HNF1A	C	G	0.01667	synonymous_variant	LOW	HNF1A	rs56348580,CM067044,CX1310026,COSM1559372,COSM1684349,COSM1684350,COSM5019699	0	-	-	NR	PATHOGENIC	NR	none		1
chr9:32632290	TAF1L	T	C	0.03889	synonymous_variant	LOW	TAF1L	rs56320744,COSM4163722	0	-	-	NR	none	NR	Confirmed somatic variant				1
chr1:156844777	NTRK1	A	G	0.005556	missense_variant	MODERATE	NTRK1	rs56320207	0	tolerated(0.23)	benign(0)	NR	none	NR	none
chr13:28896979	FLT1	T	C	0.01111	synonymous_variant	LOW	FLT1	rs56314249	0	-	-	NR	none	NR	none
chr2:85533571	TCF7L1	G	C	0.005556	splice_region_variant,intron_variant	LOW	TCF7L1	rs56311472	0	-	-	NR	none	NR	none
chr4:55604639	KIT	T	C	0.005556	synonymous_variant	LOW	KIT	rs56288823,COSM6494998	0	-	-	NR	none	NR	none
chr1:98187048	DPYD	T	C	0.005556	intron_variant	MODIFIER	DPYD	rs56276561	0	-	-	NR	none	NR	none
chr3:195594950	TNK2	A	G	0.01667	missense_variant	MODERATE	TNK2	rs56260729	0	tolerated_low_confidence(0.3)	benign(0)	NR	none	NR	none
chr2:141474403	LRP1B	A	-	0.01111	intron_variant	MODIFIER	LRP1B	rs562408545	0	-	-	NR	none	NR	none
chr4:55991461	KDR	A	C	0.07222	5_prime_UTR_variant	MODIFIER	KDR	rs56233104	0	-	-	NR	none	NR	none
chr4:88047503	AFF1	T	C	0.005556	intron_variant	MODIFIER	AFF1	rs561982538	0	-	-	NR	none	NR	none
chr1:145021183	PDE4DIP	A	C	0.04444	downstream_gene_variant	MODIFIER	RP11-326G21.1	rs56185836	0	-	-	NR	none	NR	none
chr22:39631963	PDGFB	T	G	0.06667	intron_variant	MODIFIER	PDGFB	rs56180415	0	-	-	NR	none	NR	none
chr7:100420155	EPHB4	G	A	0.05556	synonymous_variant	LOW	EPHB4	rs56173078	0	-	-	NR	none	NR	none
chr9:136898820	BRD3	T	G	0.005556	synonymous_variant	LOW	BRD3	rs56166940	0	-	-	NR	none	NR	none
chr19:45923617	ERCC1	G	A	0.005556	synonymous_variant	LOW	ERCC1	rs56148539	0	-	-	NR	none	NR	none
chr2:219561929	STK36	C	T	0.01667	synonymous_variant	LOW	STK36	rs56148168	0	-	-	NR	none	NR	none
chr18:56338792	MALT1	A	G	0.01111	5_prime_UTR_variant	MODIFIER	MALT1	rs56142402	0	-	-	NR	none	NR	none
chr2:216288841	FN1	C	T	0.005556	intron_variant	MODIFIER	FN1	rs56137176	0	-	-	NR	none	NR	none
chr2:141707855	LRP1B	C	T	0.005556	missense_variant	MODERATE	LRP1B	rs561355378	0	tolerated(0.25)	possibly_damaging(0.621)	NR	none	NR	none
chr2:29416615	ALK	A	G	0.1333	synonymous_variant	LOW	ALK	rs56132472,COSM5019786	0	-	-	NR	none	NR	none
chr6:18250083	DEK	G	T	0.005556	intron_variant	MODIFIER	DEK	rs561297111	0	-	-	NR	none	NR	none
chr5:180043439	FLT4	A	G	0.01111	synonymous_variant	LOW	FLT4	rs56127961,COSM3393497,COSM3393498	0	-	-	NR	none	NR	Confirmed somatic variant				1
chr9:139409061	NOTCH1	T	C	0.005556	missense_variant	MODERATE	NOTCH1	rs561126575	0	tolerated(0.19)	benign(0.001)	NR	none	NR	none
chr22:23595996	BCR	T	C	0.005556	synonymous_variant	LOW	BCR	rs56092735	0	-	-	NR	none	NR	none
chr13:28611382	FLT3	G	T	0.005556	missense_variant	MODERATE	FLT3	rs56090538	0	tolerated(0.35)	benign(0)	NR	none	NR	none
chr7:142561747	EPHB6	T	C	0.005556	synonymous_variant	LOW	EPHB6	rs56087487	0	-	-	NR	none	NR	none
chr5:149504348	PDGFRB	T	C	0.01111	synonymous_variant	LOW	PDGFRB	rs56072663	0	-	-	NR	none	NR	none
chr1:11184593	MTOR	G	A	0.005556	synonymous_variant	LOW	MTOR	rs56051835,COSM5021001	0	-	-	NR	none	NR	Confirmed somatic variant				1
chr1:98039419	DPYD	T	C	0.005556	synonymous_variant	LOW	DPYD	rs56038477	0	-	-	NR	none	NR	none
chr3:142242985	ATR	T	C	0.005556	synonymous_variant	LOW	ATR	rs56026468,COSM5575579	0	-	-	NR	PATHOGENIC	NR	Confirmed somatic variant		1		1
chr2:47705334	MSH2	C	T	0.005556	intron_variant	MODIFIER	MSH2	rs560246973	0	-	-	NR	none	NR	none
chr22:36690120	MYH9	C	T	0.03889	intron_variant	MODIFIER	MYH9	rs56020676	0	-	-	NR	none	NR	none
chr12:56477541	ERBB3	T	C	0.005556	missense_variant	MODERATE	ERBB3	rs56017157	0	deleterious(0.03)	benign(0.007)	NR	none	NR	none
chr8:48713456	PRKDC	T	C	0.01111	synonymous_variant	LOW	PRKDC	rs56013236	0	-	-	NR	none	NR	none
chr10:90771767	FAS	A	G	0.02222	missense_variant	MODERATE	FAS	rs56006128,CD101621,CM065175	0	tolerated(0.93)	benign(0)	NR	none	NR	none
chr20:54961674	AURKA	G	A	0.005556	intron_variant	MODIFIER	AURKA	rs559998244	0	-	-	NR	none	NR	none
chr17:78293189	RNF213	T	A	0.1333	intron_variant	MODIFIER	RNF213	rs55996424	0	-	-	NR	none	NR	none
chr4:55593481	KIT	G	A	0.01111	synonymous_variant	LOW	KIT	rs55986963,COSM21983	0	-	-	NR	PATHOGENIC	NR	none		1
chr3:10108991	FANCD2	A	G	0.005556	synonymous_variant	LOW	FANCD2	rs55980657	0	-	-	NR	none	NR	none
chr16:3778427	CREBBP	C	T	0.005556	synonymous_variant	LOW	CREBBP	rs55960450,COSM4060692	0	-	-	NR	none	NR	Confirmed somatic variant				1
chr11:69456000	CCND1	C	G	0.005556	5_prime_UTR_variant	MODIFIER	CCND1	rs55911137	0	-	-	NR	none	NR	none
chr19:57746617	AURKC	G	A	0.005556	splice_region_variant,synonymous_variant	LOW	AURKC	rs55898757	0	-	-	NR	none	NR	none
chr12:56487657	ERBB3	C	G	0.01111	synonymous_variant	LOW	ERBB3	rs55880327	0	-	-	NR	none	NR	none
chr5:176520431	FGFR4	A	G	0.01111	missense_variant	MODERATE	FGFR4	rs55879131	0	tolerated(0.66)	benign(0.015)	NR	none	NR	none
chr17:8110940	AURKB	A	G	0.005556	missense_variant	MODERATE	AURKB	rs55878091,CM1210017	0	tolerated(0.11)	benign(0)	NR	none	NR	none
chr21:46321659	ITGB2	A	C	0.07778	intron_variant	MODIFIER	ITGB2	rs55865320	0	-	-	NR	none	NR	none
chr12:49448463	MLL2	T	C	0.005556	missense_variant	MODERATE	KMT2D	rs55865069,COSM3773644	0	tolerated(0.49)	benign(0.001)	NR	none	NR	none
chr6:152599126	SYNE1	T	C	0.005556	intron_variant	MODIFIER	SYNE1	rs558642986	0	-	-	NR	none	NR	none
chr16:65022156	CDH11	A	G	0.005556	synonymous_variant	LOW	CDH11	rs55854547	0	-	-	NR	none	NR	none
chr12:121437114	HNF1A	A	G	0.05	synonymous_variant	LOW	HNF1A	rs55834942,COSM1559373,COSM1559374	0	-	-	NR	none	NR	none
chr19:45860637	ERCC2	A	G	0.005556	splice_region_variant,intron_variant	LOW	ERCC2	rs558250151,COSM5194342	0	-	-	NR	PATHOGENIC	NR	Confirmed somatic variant		1		1
chr6:134493467	SGK1	-	GAATA	0.005556	intron_variant	MODIFIER	SGK1	rs55811643	0	-	-	NR	none	NR	none
chr10:43598049	RET	T	C	0.005556	synonymous_variant	LOW	RET	rs55810667	0	-	-	NR	none	NR	none
chr12:49418435	MLL2	C	A	0.01111	synonymous_variant	LOW	KMT2D	rs55776396,COSM5019633	0	-	-	NR	none	NR	none
chr11:95826714	MAML2	G	A	0.005556	intron_variant	MODIFIER	MAML2	rs55755066	0	-	-	NR	none	NR	none
chr2:216234981	FN1	C	G	0.01111	intron_variant	MODIFIER	FN1	rs55739979	0	-	-	NR	none	NR	none
chr15:41803754	LTK	A	G	0.005556	missense_variant	MODERATE	LTK	rs55739813	0	deleterious_low_confidence(0)	probably_damaging(1)	NR	none	NR	none
chr17:8051922	PER1	T	C	0.06667	intron_variant	MODIFIER	PER1	rs55720390	0	-	-	NR	none	NR	none
chr16:27441380	IL21R	T	C	0.005556	5_prime_UTR_variant	MODIFIER	IL21R	rs557091943	0	-	-	NR	none	NR	none
chr1:97981508	DPYD	T	C	0.005556	intron_variant	MODIFIER	DPYD	rs55699321	0	-	-	NR	none	NR	none
chr16:3799539	CREBBP	C	T	0.005556	intron_variant	MODIFIER	CREBBP	rs55695906	0	-	-	NR	none	NR	none
chr1:156849946	NTRK1	A	G	0.005556	synonymous_variant	LOW	NTRK1	rs55668752	0	-	-	NR	none	NR	none
chr8:71078749	NCOA2	T	G	0.005556	intron_variant	MODIFIER	NCOA2	rs55654377	0	-	-	NR	none	NR	none
chr4:87968736	AFF1	C	A	0.005556	missense_variant	MODERATE	AFF1	rs55652800	0	deleterious(0.01)	probably_damaging(0.981)	NR	none	NR	none
chr17:48270137	COL1A1	A	C	0.005556	intron_variant	MODIFIER	COL1A1	rs555722335	0	-	-	NR	none	NR	none
chr9:35077441	FANCG	C	T	0.1778	intron_variant	MODIFIER	FANCG	rs554098	0	-	-	NR	none	NR	none
chr12:43769853	ADAMTS20	A	C	0.005556	splice_region_variant,intron_variant	LOW	ADAMTS20	rs553663599	0	-	-	NR	none	NR	none
chr6:117631431	ROS1	G	T	0.09444	synonymous_variant	LOW	ROS1	rs552183	0	-	-	NR	none	NR	none
chr10:76781881	KAT6B	G	A	0.005556	synonymous_variant	LOW	KAT6B	rs551589427	0	-	-	NR	none	NR	none
chr6:117638255	ROS1	G	T	0.005556	intron_variant	MODIFIER	ROS1	rs551479458	0	-	-	NR	none	NR	none
chr7:50444387	IKZF1	A	G	0.005556	missense_variant	MODERATE	IKZF1	rs549930725	0	deleterious(0.03)	possibly_damaging(0.853)	NR	none	NR	none
chr6:51924662	PKHD1	A	C	0.01667	intron_variant	MODIFIER	PKHD1	rs549859844	0	-	-	NR	none	NR	none
chr1:204518869	MDM4	T	C	0.01111	3_prime_UTR_variant	MODIFIER	MDM4	rs549301802	0	-	-	NR	none	NR	none
chr3:65422772	MAGI1	-	A	0.005556	intron_variant	MODIFIER	MAGI1	rs546799566	0	-	-	NR	none	NR	none
chr8:48866189	PRKDC	C	T	0.005556	missense_variant	MODERATE	PRKDC	rs546088914,COSM2718019,COSM2718020	0	tolerated(0.63)	benign(0.003)	NR	PATHOGENIC	NR	none		1
chr10:98031065	BLNK	-	A	0.005556	intron_variant	MODIFIER	BLNK	rs545970363	0	-	-	NR	none	NR	none
chr3:38180104	MYD88	GGCGG	-	0.01667	5_prime_UTR_variant	MODIFIER	MYD88	rs545602132	0	-	-	NR	none	NR	none
chr3:138409858	PIK3CB	A	G	0.005556	synonymous_variant	LOW	PIK3CB	rs545289735	0	-	-	NR	none	NR	none
chr3:71064802	FOXP1	G	A	0.005556	missense_variant,splice_region_variant	MODERATE	FOXP1	rs542877012	0	tolerated(0.58)	benign(0.003)	NR	none	NR	none
chr4:1807249	FGFR3	A	G	0.005556	intron_variant	MODIFIER	FGFR3	rs542820391	0	-	-	NR	none	NR	none
chr22:36690278	MYH9	T	C	0.01111	missense_variant	MODERATE	MYH9	rs542791128	0	tolerated(0.08)	benign(0.1)	NR	none	NR	none
chr10:76788618	KAT6B	T	G	0.005556	missense_variant	MODERATE	KAT6B	rs542036896	0	tolerated_low_confidence(0.15)	possibly_damaging(0.459)	NR	none	NR	none
chr6:94124530	EPHA7	A	C	0.04444	intron_variant	MODIFIER	EPHA7	rs540816	0	-	-	NR	none	NR	none
chr22:36718386	MYH9	A	G	0.005556	intron_variant	MODIFIER	MYH9	rs540368397	0	-	-	NR	none	NR	none
chr11:64572557	MEN1	G	A	0.04444	synonymous_variant	LOW	MEN1	rs540012	0	-	-	NR	none	NR	none
chr9:93639961	SYK	A	G	0.01111	synonymous_variant	LOW	SYK	rs539643362	0	-	-	NR	none	NR	none
chr11:119145466	CBL	G	T	0.005556	intron_variant	MODIFIER	CBL	rs539447357	0	-	-	NR	none	NR	none
chr11:94212048	MRE11A	T	C	0.2944	splice_region_variant,intron_variant	LOW	MRE11A	rs535801	0	-	-	NR	none	NR	none
chr2:178097270	NFE2L2	A	G	0.005556	synonymous_variant	LOW	NFE2L2	rs535776153	0	-	-	NR	none	NR	none
chr17:29557466	NF1	G	A	0.005556	intron_variant	MODIFIER	NF1	rs535609733	0	-	-	NR	none	NR	none
chr15:40917890	CASC5	A	G	0.005556	intron_variant	MODIFIER	CASC5	rs535397796	0	-	-	NR	none	NR	none
chr7:91631708	AKAP9	C	T	0.005556	missense_variant	MODERATE	AKAP9	rs534185372	0	tolerated(1)	benign(0)	NR	none	NR	none
chr17:29677228	NF1	A	G	0.005556	missense_variant	MODERATE	NF1	rs533110479,COSM7002270,COSM7077440,COSM7077441	0	deleterious(0)	probably_damaging(0.999)	NR	PATHOGENIC	NR	none		1
chr17:29663626	NF1	T	A	0.01111	intron_variant	MODIFIER	NF1	rs532337091	0	-	-	NR	none	NR	none
chr9:139410189	NOTCH1	C	G	0.01667	intron_variant	MODIFIER	NOTCH1	rs531296045	0	-	-	NR	none	NR	none
chr8:48691260	PRKDC	A	-	0.01111	intron_variant	MODIFIER	PRKDC	rs529548862	0	-	-	NR	none	NR	none
chr6:117622188	ROS1	G	T	0.03889	missense_variant	MODERATE	ROS1	rs529156	0	tolerated(1)	benign(0)	NR	none	NR	none
chr6:117622233	ROS1	T	C	0.03889	missense_variant	MODERATE	ROS1	rs529038,CM053396	0	deleterious(0.02)	benign(0.015)	NR	none	NR	none
chr17:5461671	NLRP1	C	G	0.02222	missense_variant	MODERATE	NLRP1	rs52795654	0	tolerated(0.75)	benign(0.001)	NR	none	NR	none
chr1:186645078	PTGS2	G	A	0.005556	synonymous_variant	LOW	PTGS2	rs5279	0	-	-	NR	none	NR	none
chr1:186645669	PTGS2	G	A	0.005556	synonymous_variant	LOW	PTGS2	rs5278	0	-	-	NR	none	NR	none
chr1:186648197	PTGS2	G	C	0.09444	synonymous_variant	LOW	PTGS2	rs5277	0	-	-	NR	none	NR	none
chr6:32188603	NOTCH4	T	C	0.1389	synonymous_variant	LOW	NOTCH4	rs520803	0	-	-	NR	none	NR	none
chr6:32188640	NOTCH4	C	T	0.1389	missense_variant	MODERATE	NOTCH4	rs520692	0	tolerated(0.33)	benign(0.005)	NR	none	NR	none
chr6:32188642	NOTCH4	C	T	0.1389	synonymous_variant	LOW	NOTCH4	rs520688	0	-	-	NR	none	NR	none
chr15:43579566	TGM7	G	A	0.1667	synonymous_variant	LOW	TGM7	rs513970	0	-	-	NR	none	NR	none
chr11:125525195	CHEK1	A	G	0.2944	missense_variant	MODERATE	CHEK1	rs506504	0	tolerated(1)	benign(0)	NR	none	NR	none
chr6:44220076	HSP90AB1	C	T	0.2889	intron_variant	MODIFIER	HSP90AB1	rs504697	0	-	-	NR	none	NR	none
chr9:120476906	TLR4	A	C	0.01667	missense_variant	MODERATE	TLR4	rs5030724,COSM6425950	0	tolerated_low_confidence(0.25)	benign(0.001)	NR	none	NR	Confirmed somatic variant				1
chr9:120475936	TLR4	T	G	0.01111	missense_variant	MODERATE	TLR4	rs5030719,CM113996	0	tolerated(0.29)	benign(0.005)	NR	none	NR	none
chr9:120475826	TLR4	A	G	0.005556	missense_variant	MODERATE	TLR4	rs5030718,CM035922	0	tolerated(0.3)	benign(0)	NR	none	NR	none
chr21:46320403	ITGB2	T	C	0.02222	intron_variant	MODIFIER	ITGB2	rs5030670	0	-	-	NR	none	NR	none
chr21:46321677	ITGB2	A	G	0.02778	intron_variant	MODIFIER	ITGB2	rs5030669	0	-	-	NR	none	NR	none
chr21:46326815	ITGB2	T	C	0.03889	intron_variant	MODIFIER	ITGB2	rs5030668	0	-	-	NR	none	NR	none
chr21:46330667	ITGB2	A	G	0.06667	synonymous_variant	LOW	ITGB2	rs5030667	0	-	-	NR	none	NR	none
chr11:32410516	WT1	C	T	0.02222	3_prime_UTR_variant	MODIFIER	WT1	rs5030315	0	-	-	NR	none	NR	none
chr11:32449417	WT1	G	C	0.07778	intron_variant	MODIFIER	WT1	rs5030171	0	-	-	NR	none	NR	none
chr11:32449420	WT1	A	C	0.07778	intron_variant	MODIFIER	WT1	rs5030170	0	-	-	NR	none	NR	none
chr11:32456691	WT1	A	C	0.005556	missense_variant	MODERATE	WT1	rs5030135,COSM4145654	0	deleterious_low_confidence(0.01)	benign(0)	NR	none	NR	Confirmed somatic variant				1
chr6:138197329	TNFAIP3	T	C	0.1444	intron_variant	MODIFIER	TNFAIP3	rs5029948	0	-	-	NR	none	NR	none
chr1:144854180	PDE4DIP	C	T	0.2056	synonymous_variant	LOW	PDE4DIP	rs4997148	0	-	-	NR	none	NR	none
chr3:38182136	MYD88	G	C	0.005556	intron_variant	MODIFIER	MYD88	rs4988457	0	-	-	NR	none	NR	none
chr17:59763114	FANCJ	T	A	0.01667	intron_variant	MODIFIER	BRIP1	rs4988357	0	-	-	NR	none	NR	none
chr17:59926645	FANCJ	T	C	0.005556	intron_variant	MODIFIER	BRIP1	rs4988343	0	-	-	NR	none	NR	none
chr11:108099888	ATM	G	A	0.01111	intron_variant	MODIFIER	ATM	rs4987907	0	-	-	NR	none	NR	none
chr8:30921970	WRN	T	A	0.01667	intron_variant	MODIFIER	WRN	rs4987239	0	-	-	NR	none	NR	none
chr8:30938692	WRN	T	G	0.01111	missense_variant	MODERATE	WRN	rs4987238	0	tolerated(0.73)	benign(0.007)	NR	none	NR	none
chr9:35076517	FANCG	A	G	0.005556	missense_variant	MODERATE	FANCG	rs4986940	0	tolerated(0.48)	benign(0.355)	NR	none	NR	none
chr6:152201875	ESR1	C	T	0.03333	synonymous_variant	LOW	ESR1	rs4986934	0	-	-	NR	none	NR	none
chr12:51203376	ATF1	C	T	0.2556	splice_region_variant,intron_variant	LOW	ATF1	rs4986838	0	-	-	NR	none	NR	none
chr9:120475602	TLR4	T	C	0.02222	missense_variant	MODERATE	TLR4	rs4986791,CM001362	0	deleterious(0.02)	benign(0.052)	NR	none	NR	none
chr9:120475302	TLR4	G	A	0.03889	missense_variant	MODERATE	TLR4	rs4986790,CM001361	0	tolerated(0.15)	benign(0.033)	NR	none	NR	none
chr17:59763347	FANCJ-BRIP1	G	A	0.3	missense_variant	MODERATE	BRIP1	rs4986764,CM046104	0	tolerated(0.94)	benign(0)	NR	none	NR	none
chr17:59760996	FANCJ-BRIP1	G	A	0.25	synonymous_variant	LOW	BRIP1	rs4986763	0	-	-	NR	none	NR	none
chr11:108124761	ATM	C	T	0.01111	missense_variant	MODERATE	ATM	rs4986761,CM013692,COSM41595	0	tolerated(0.32)	benign(0)	NR	none	NR	none
chr11:94225920	MRE11A	T	C	0.2556	intron_variant	MODIFIER	MRE11A	rs497763	0	-	-	NR	none	NR	none
chr6:117639419	ROS1	C	T	0.05	splice_region_variant,intron_variant	LOW	ROS1	rs497186	0	-	-	NR	none	NR	none
chr9:135772717	TSC1	A	G	0.06111	synonymous_variant	LOW	TSC1	rs4962081,COSM5019550	0	-	-	NR	none	NR	Confirmed somatic variant				1
chr2:141473505	LRP1B	T	A	0.2722	intron_variant	MODIFIER	LRP1B	rs4954852	0	-	-	NR	none	NR	none
chr2:141274576	LRP1B	C	T	0.2778	synonymous_variant	LOW	LRP1B	rs4954672,COSM4001201	0	-	-	NR	PATHOGENIC	NR	Confirmed somatic variant		1		1
chr14:102550803	HSP90AA1	A	G	0.1111	synonymous_variant	LOW	HSP90AA1	rs4947	0	-	-	NR	none	NR	none
chr18:56390553	MALT1	G	A	0.07778	intron_variant	MODIFIER	MALT1	rs4940744	0	-	-	NR	none	NR	none
chr8:145737636	RECQL4	G	A	0.1667	downstream_gene_variant	MODIFIER	MFSD3	rs4925828	0	-	-	NR	none	NR	none
chr10:104160434	NFKB2	G	A	0.06667	synonymous_variant	LOW	NFKB2	rs4919634	0	-	-	NR	none	NR	none
chr10:104159196	NFKB2	G	A	0.03333	synonymous_variant	LOW	NFKB2	rs4919633	0	-	-	NR	none	NR	none
chr10:104157727	NFKB2	C	T	0.4556	intron_variant	MODIFIER	NFKB2	rs4919632	0	-	-	NR	none	NR	none
chr10:104389932	SUFU	T	G	0.2778	3_prime_UTR_variant	MODIFIER	SUFU	rs4917980	0	-	-	NR	none	NR	none
chr11:125497466	CHEK1	T	G	0.03889	intron_variant	MODIFIER	CHEK1	rs491528	0	-	-	NR	none	NR	none
chr20:31024274	ASXL1	C	T	0.2333	synonymous_variant	LOW	ASXL1	rs4911231,COSM4134435	0	-	-	NR	none	NR	none
chr14:51227000	NIN	G	A	0.2167	synonymous_variant	LOW	NIN	rs4901055	0	-	-	NR	none	NR	none
chr17:78319380	RNF213	C	G	0.3667	synonymous_variant	LOW	RNF213	rs4890012	0	-	-	NR	none	NR	none
chr17:78311508	RNF213	A	G	0.3944	synonymous_variant	LOW	RNF213	rs4890009	0	-	-	NR	none	NR	none
chr17:78354661	RNF213	T	C	0.2944	synonymous_variant	LOW	RNF213	rs4889848	0	-	-	NR	none	NR	none
chr17:78346548	RNF213	A	G	0.005556	intron_variant	MODIFIER	RNF213	rs4889847	0	-	-	NR	none	NR	none
chr8:113308243	CSMD3	G	A	0.1444	splice_region_variant,intron_variant	LOW	CSMD3	rs4876462	0	-	-	NR	none	NR	none
chr8:113237045	CSMD3	T	C	0.1722	synonymous_variant	LOW	CSMD3	rs4876458	0	-	-	NR	none	NR	none
chr8:48739440	PRKDC	A	C	0.005556	intron_variant	MODIFIER	PRKDC	rs4873728	0	-	-	NR	none	NR	none
chr6:152660310	SYNE1	G	A	0.05	intron_variant	MODIFIER	SYNE1	rs4870095	0	-	-	NR	none	NR	none
chr1:2488153	TNFRSF14	G	A	0.06111	missense_variant	MODERATE	TNFRSF14	rs4870,COSM4999217	0	tolerated(0.26)	benign(0.159)	NR	none	NR	none
chr1:182554557	RNASEL	T	C	0.02222	missense_variant	MODERATE	RNASEL	rs486907,CM020962	0	tolerated(0.09)	possibly_damaging(0.864)	NR	none	NR	none
chr2:100343557	AFF3	T	C	0.2444	missense_variant	MODERATE	AFF3	rs4851223	0	tolerated(1)	benign(0)	NR	none	NR	none
chr2:100288931	AFF3	A	G	0.06667	intron_variant	MODIFIER	AFF3	rs4851222	0	-	-	NR	none	NR	none
chr2:100218080	AFF3	A	G	0.2056	synonymous_variant	LOW	AFF3	rs4851214	0	-	-	NR	none	NR	none
chr2:113999534	PAX8	C	G	0.06667	intron_variant	MODIFIER	PAX8	rs4849186	0	-	-	NR	none	NR	none
chr22:36690113	MYH9	A	G	0.1944	intron_variant	MODIFIER	MYH9	rs4821478	0	-	-	NR	none	NR	none
chr17:75303298	SEP9	C	T	0.3222	intron_variant	MODIFIER	SEPT9	rs4789439	0	-	-	NR	none	NR	none
chr16:15865472	MYH11	A	G	0.02778	synonymous_variant	LOW	MYH11	rs4781689	0	-	-	NR	none	NR	none
chr13:110435953	IRS2	G	A	0.2389	synonymous_variant	LOW	IRS2	rs4773092	0	-	-	NR	none	NR	none
chr12:6762026	ING4	C	T	0.1111	intron_variant	MODIFIER	ING4	rs4764506	0	-	-	NR	none	NR	none
chr6:94120192	EPHA7	A	G	0.06111	intron_variant	MODIFIER	EPHA7	rs474809	0	-	-	NR	none	NR	none
chr8:30933859	WRN	T	C	0.05556	intron_variant	MODIFIER	WRN	rs4733221	0	-	-	NR	none	NR	none
chr6:56417545	DST	C	T	0.2	missense_variant	MODERATE	DST	rs4715631	0	tolerated(1)	benign(0.003)	NR	none	NR	none
chr6:56417282	DST	T	C	0.09444	missense_variant	MODERATE	DST	rs4715630	0	tolerated(0.41)	benign(0)	NR	none	NR	none
chr6:51923409	PKHD1	T	A	0.03333	intron_variant	MODIFIER	PKHD1	rs4715272	0	-	-	NR	none	NR	none
chr6:51917968	PKHD1	G	T	0.08333	synonymous_variant	LOW	PKHD1	rs4715271	0	-	-	NR	none	NR	none
chr6:51491884	PKHD1	C	T	0.1889	missense_variant	MODERATE	PKHD1	rs4715227	0	tolerated(0.14)	benign(0.134)	NR	none	NR	none
chr6:56463410	DST	C	T	0.3167	missense_variant	MODERATE	DST	rs4712138,COSM4004092,COSM4004093	0	tolerated(0.17)	benign(0.003)	NR	none	NR	Confirmed somatic variant				1
chr6:160453561	IGF2R	G	T	0.03333	intron_variant	MODIFIER	IGF2R	rs4709390	0	-	-	NR	none	NR	none
chr3:3209242	CRBN	T	G	0.01111	intron_variant	MODIFIER	CRBN	rs4685612	0	-	-	NR	none	NR	none
chr3:46497723	LTF	G	C	0.05556	intron_variant	MODIFIER	LTF	rs4683227	0	-	-	NR	none	NR	none
chr9:136907108	BRD3	A	G	0.02222	intron_variant	MODIFIER	BRD3	rs467317	0	-	-	NR	none	NR	none
chr1:144994902	PDE4DIP	A	G	0.03889	5_prime_UTR_variant	MODIFIER	PDE4DIP	rs4649499	0	-	-	NR	none	NR	none
chr9:136913355	BRD3	C	T	0.2389	synonymous_variant	LOW	BRD3	rs464826,COSM4163507,COSM4163508	0	-	-	NR	none	NR	Confirmed somatic variant				1
chr4:103527655	NFKB1	A	G	0.01111	splice_region_variant,synonymous_variant	LOW	NFKB1	rs4648093	0	-	-	NR	none	NR	none
chr4:103522114	NFKB1	T	C	0.005556	missense_variant	MODERATE	NFKB1	rs4648085	0	tolerated(1)	benign(0.006)	NR	none	NR	none
chr4:103514741	NFKB1	C	T	0.1111	intron_variant	MODIFIER	NFKB1	rs4648050	0	-	-	NR	none	NR	none
chr4:103514737	NFKB1	T	C	0.01111	intron_variant	MODIFIER	NFKB1	rs4648049	0	-	-	NR	none	NR	none
chr4:103505961	NFKB1	T	C	0.01111	synonymous_variant	LOW	NFKB1	rs4648039	0	-	-	NR	none	NR	none
chr3:37050325	MLH1	T	C	0.005556	synonymous_variant	LOW	MLH1	rs4647256	0	-	-	NR	none	NR	none
chr3:37050254	MLH1	C	T	0.005556	intron_variant	MODIFIER	MLH1	rs4647255	0	-	-	NR	none	NR	none
chr8:128750540	MYC	G	A	0.005556	missense_variant	MODERATE	MYC	rs4645959,CM057723	0	deleterious(0.01)	probably_damaging(0.984)	NR	none	NR	none
chr6:152665261	SYNE1	A	C	0.2944	missense_variant	MODERATE	SYNE1	rs4645434	0	-	benign(0.031)	NR	none	NR	none
chr17:45369777	ITGB3	G	A	0.07222	synonymous_variant	LOW	ITGB3	rs4642	0	-	-	NR	none	NR	none
chr17:45369789	ITGB3	A	G	0.07222	synonymous_variant	LOW	ITGB3	rs4634	0	-	-	NR	none	NR	none
chr2:29446202	ALK	A	G	0.1778	splice_region_variant,intron_variant	LOW	ALK	rs4622670,COSM6353289	0	-	-	NR	none	NR	Confirmed somatic variant				1
chr9:136913123	BRD3	G	C	0.01667	intron_variant	MODIFIER	BRD3	rs460888	0	-	-	NR	none	NR	none
chr2:29498210	ALK	G	A	0.1333	intron_variant	MODIFIER	ALK	rs4589708	0	-	-	NR	none	NR	none
chr14:102551788	HSP90AA1	G	A	0.005556	intron_variant	MODIFIER	HSP90AA1	rs4586364	0	-	-	NR	none	NR	none
chr6:91266350	MAP3K7	T	A	0.01667	splice_region_variant,intron_variant	LOW	MAP3K7	rs45625637	0	-	-	NR	none	NR	none
chr8:48801554	PRKDC	A	G	0.005556	intron_variant	MODIFIER	PRKDC	rs45625437	0	-	-	NR	none	NR	none
chr7:55220270	EGFR	T	C	0.005556	synonymous_variant	LOW	EGFR	rs45621033	0	-	-	NR	none	NR	none
chr15:99467189	IGF1R	G	A	0.005556	missense_variant	MODERATE	IGF1R	rs45611935,CM110091	0	tolerated(0.68)	benign(0.014)	NR	none	NR	none
chr15:99467964	IGF1R	C	T	0.005556	intron_variant	MODIFIER	IGF1R	rs45610435	0	-	-	NR	none	NR	none
chr1:65335062	JAK1	G	A	0.05556	synonymous_variant	LOW	JAK1	rs45598436,COSM5020688	0	-	-	NR	none	NR	Confirmed somatic variant				1
chr7:98552710	TRRAP	T	C	0.005556	intron_variant	MODIFIER	TRRAP	rs45586131	0	-	-	NR	none	NR	none
chr22:28194747	MN1	T	C	0.005556	synonymous_variant	LOW	MN1	rs45554336	0	-	-	NR	none	NR	none
chr16:23634293	PALB2	T	C	0.03333	missense_variant	MODERATE	PALB2	rs45551636,CM098533	0	deleterious(0)	probably_damaging(1)	NR	none	NR	none
chr14:51210905	NIN	A	G	0.01667	intron_variant	MODIFIER	NIN	rs45549238	0	-	-	NR	none	NR	none
chr8:48856474	PRKDC	C	T	0.005556	intron_variant	MODIFIER	PRKDC	rs45548835	0	-	-	NR	none	NR	none
chr16:23641461	PALB2	G	C	0.07222	missense_variant	MODERATE	PALB2	rs45532440,CM112099	0	tolerated(0.1)	benign(0.047)	NR	none	NR	none
chr16:2133701	TSC2	A	G	0.005556	missense_variant	MODERATE	TSC2	rs45517319,COSM6980451	0	tolerated_low_confidence(0.08)	probably_damaging(0.981)	NR	PATHOGENIC	NR	Confirmed somatic variant		1		1
chr16:23619235	PALB2	C	A	0.07778	synonymous_variant	LOW	PALB2	rs45516100	0	-	-	NR	none	NR	none
chr6:51920485	PKHD1	A	G	0.01667	missense_variant	MODERATE	PKHD1	rs45500692	0	deleterious(0.03)	probably_damaging(0.998)	NR	none	NR	none
chrX:76952030	ATRX	T	C	0.008	intron_variant	MODIFIER	ATRX	rs45494097	0	-	-	NR	none	NR	none
chr1:204434438	PIK3C2B	A	G	0.03333	missense_variant	MODERATE	PIK3C2B	rs45492196	0	deleterious(0.01)	benign(0.23)	NR	none	NR	none
chr1:6527825	PLEKHG5	T	G	0.005556	intron_variant	MODIFIER	PLEKHG5	rs45463998	0	-	-	NR	none	NR	none
chr11:22646398	FANCF	A	G	0.005556	missense_variant	MODERATE	FANCF	rs45451294	0	tolerated(1)	possibly_damaging(0.493)	NR	none	NR	none
chr17:59761304	BRIP1	A	G	0.005556	missense_variant	MODERATE	BRIP1	rs45437094,COSM6930399,COSM6930400	0	deleterious_low_confidence(0.02)	benign(0.282)	NR	none	NR	Confirmed somatic variant				1
chr5:176518784	FGFR4	T	C	0.3111	synonymous_variant	LOW	FGFR4	rs452885	0	-	-	NR	none	NR	none
chr5:131892979	RAD50	A	G	0.3	5_prime_UTR_variant	MODIFIER	RAD50	rs4526098	0	-	-	NR	none	NR	none
chr6:152793412	SYNE1	A	C	0.2444	intron_variant	MODIFIER	SYNE1	rs4523096	0	-	-	NR	none	NR	none
chr9:139418260	NOTCH1	G	A	0.07778	synonymous_variant	LOW	NOTCH1	rs4489420,COSM1756050	0	-	-	NR	none	NR	Confirmed somatic variant				1
chr5:180046344	FLT4	C	G	0.06667	missense_variant	MODERATE	FLT4	rs448012	0	deleterious(0.01)	benign(0.285)	NR	none	NR	none
chr5:176517461	FGFR4	G	T	0.4778	synonymous_variant	LOW	FGFR4	rs446382	0	-	-	NR	none	NR	none
chr2:141260507	LRP1B	C	T	0.01667	intron_variant	MODIFIER	LRP1B	rs4450541	0	-	-	NR	none	NR	none
chr6:32190406	NOTCH4	G	A	0.25	synonymous_variant	LOW	NOTCH4	rs443198,CM030916	0	-	-	NR	none	NR	none
chr6:152683413	SYNE1	T	G	0.2278	synonymous_variant	LOW	SYNE1	rs4407724	0	-	-	NR	none	NR	none
chr5:180055864	FLT4	A	G	0.1278	intron_variant	MODIFIER	FLT4	rs438464	0	-	-	NR	none	NR	none
chr12:25368462	KRAS	C	T	0.1333	synonymous_variant	LOW	KRAS	rs4362222	0	-	-	NR	none	NR	none
chr2:30143499	ALK	C	G	0.2333	synonymous_variant	LOW	ALK	rs4358080,COSM3749653	0	-	-	NR	none	NR	none
chr6:152793575	SYNE1	G	A	0.09444	intron_variant	MODIFIER	SYNE1	rs4343926	0	-	-	NR	none	NR	none
chr2:142012027	LRP1B	T	G	0.03333	intron_variant	MODIFIER	LRP1B	rs431809	0	-	-	NR	none	NR	none
chr6:32188099	NOTCH4	T	C	0.03333	intron_variant	MODIFIER	NOTCH4	rs430916	0	-	-	NR	none	NR	none
chr8:48739305	PRKDC	A	G	0.04444	missense_variant	MODERATE	PRKDC	rs4278157	0	tolerated(0.05)	possibly_damaging(0.663)	NR	none	NR	none
chr1:204518741	MDM4	A	G	0.005556	synonymous_variant	LOW	MDM4	rs4252742	0	-	-	NR	none	NR	none
chr1:204512100	MDM4	C	T	0.1778	intron_variant	MODIFIER	MDM4	rs4252717	0	-	-	NR	none	NR	none
chr1:204501383	MDM4	T	C	0.02222	intron_variant	MODIFIER	MDM4	rs4252697	0	-	-	NR	none	NR	none
chr17:37868715	ERBB2	T	C	0.4111	intron_variant	MODIFIER	ERBB2	rs4252627	0	-	-	NR	none	NR	none
chr17:37866741	ERBB2	T	G	0.005556	splice_region_variant,intron_variant	LOW	ERBB2	rs4252619	0	-	-	NR	none	NR	none
chr8:145737816	RECQL4	T	C	0.05	downstream_gene_variant	MODIFIER	MFSD3	rs4251691	0	-	-	NR	none	NR	none
chr8:145741130	RECQL4	T	C	0.15	upstream_gene_variant	MODIFIER	LRRC14	rs4251689	0	-	-	NR	none	NR	none
chr1:204518842	MDM4	A	C	0.2778	3_prime_UTR_variant	MODIFIER	MDM4	rs4245739,CR108921	0	-	-	NR	none	NR	none
chr8:145741765	RECQL4	A	G	0.07778	upstream_gene_variant	MODIFIER	LRRC14	rs4244613	0	-	-	NR	none	NR	none
chr8:145741702	RECQL4	G	C	0.01111	upstream_gene_variant	MODIFIER	LRRC14	rs4244612	0	-	-	NR	none	NR	none
chr8:145739924	RECQL4	A	G	0.05	upstream_gene_variant	MODIFIER	LRRC14	rs4244611	0	-	-	NR	none	NR	none
chr8:145737514	RECQL4	A	G	0.02778	downstream_gene_variant	MODIFIER	GPT	rs4244610	0	-	-	NR	none	NR	none
chr10:96541616	CYP2C19	A	G	0.05556	synonymous_variant	LOW	CYP2C19	rs4244285,CS941458	0	-	-	NR	none	NR	none
chr5:176522728	FGFR4	T	C	0.4778	splice_region_variant,intron_variant	LOW	FGFR4	rs42409	0	-	-	NR	none	NR	none
chr5:180047863	FLT4	G	C	0.07778	intron_variant	MODIFIER	FLT4	rs423086	0	-	-	NR	none	NR	none
chr6:32188297	NOTCH4	C	G	0.1944	synonymous_variant	LOW	NOTCH4	rs423023,COSM3348621	0	-	-	NR	none	NR	Confirmed somatic variant				1
chr6:32188383	NOTCH4	C	T	0.1444	missense_variant	MODERATE	NOTCH4	rs422951,CM133099	0	tolerated(0.42)	benign(0.003)	NR	none	NR	none
chr7:92247333	CDK6	G	A	0.06111	intron_variant	MODIFIER	CDK6	rs42043	0	-	-	NR	none	NR	none
chr3:3192525	CRBN	TAAC	-	0.3278	3_prime_UTR_variant	MODIFIER	CRBN	rs4183	0	-	-	NR	none	NR	none
chr7:98556962	TRRAP	T	C	0.05	splice_region_variant,intron_variant	LOW	TRRAP	rs41633	0	-	-	NR	none	NR	none
chr6:32189032	NOTCH4	C	T	0.05556	synonymous_variant	LOW	NOTCH4	rs415929	0	-	-	NR	none	NR	none
chr3:14212047	XPC	A	G	0.005556	synonymous_variant	LOW	XPC	rs41545713	0	-	-	NR	none	NR	none
chr13:49050826	RB1	A	G	0.01111	intron_variant	MODIFIER	RB1	rs4151624	0	-	-	NR	none	NR	none
chr15:39874396	THBS1	G	T	0.02222	missense_variant,splice_region_variant	MODERATE	THBS1	rs41515347	0	tolerated_low_confidence(0.18)	probably_damaging(0.952)	NR	none	NR	none
chr13:103524762	ERCC5	T	C	0.1	intron_variant	MODIFIER	ERCC5	rs4150360	0	-	-	NR	none	NR	none
chr13:103519251	ERCC5	T	C	0.005556	intron_variant	MODIFIER	ERCC5	rs4150336	0	-	-	NR	none	NR	none
chr13:103515288	ERCC5	C	G	0.005556	missense_variant	MODERATE	ERCC5	rs4150319	0	tolerated(0.64)	benign(0)	NR	none	NR	none
chr13:103515267	ERCC5	A	G	0.005556	missense_variant	MODERATE	ERCC5	rs4150318	0	tolerated(0.48)	benign(0)	NR	none	NR	none
chr13:103513951	BIVM-ERCC5	G	A	0.01667	missense_variant	MODERATE	ERCC5	rs4150313	0	deleterious(0.01)	probably_damaging(0.995)	NR	none	NR	none
chr7:55270257	EGFR	T	C	0.01111	synonymous_variant	LOW	EGFR	rs41494749,COSM1559818	0	-	-	NR	none	NR	none
chr7:2968291	CARD11	A	G	0.01111	synonymous_variant	LOW	CARD11	rs41454944	0	-	-	NR	none	NR	none
chr7:2974165	CARD11	T	C	0.01111	synonymous_variant	LOW	CARD11	rs41396348	0	-	-	NR	none	NR	none
chr15:39874973	THBS1	A	C	0.005556	intron_variant	MODIFIER	THBS1	rs41376748	0	-	-	NR	none	NR	none
chr3:12434272	PPARG	T	A	0.005556	intron_variant	MODIFIER	PPARG	rs4135334	0	-	-	NR	none	NR	none
chr15:39880818	THBS1	T	C	0.01111	synonymous_variant	LOW	THBS1	rs41338344	0	-	-	NR	none	NR	none
chr17:48272469	COL1A1	C	G	0.01111	splice_region_variant,intron_variant	LOW	COL1A1	rs41317361	0	-	-	NR	none	NR	none
chr17:48271904	COL1A1	C	G	0.005556	intron_variant	MODIFIER	COL1A1	rs41316653	0	-	-	NR	none	NR	none
chr1:144931461	PDE4DIP	T	A	0.09444	intron_variant	MODIFIER	PDE4DIP	rs41315685	0	-	-	NR	none	NR	none
chr1:144931087	PDE4DIP	C	T	0.1389	intron_variant	MODIFIER	PDE4DIP	rs41315684	0	-	-	NR	none	NR	none
chr17:45368248	ITGB3	A	G	0.01111	intron_variant	MODIFIER	ITGB3	rs41315064	0	-	-	NR	none	NR	none
chr20:40743945	PTPRT	G	A	0.005556	missense_variant	MODERATE	PTPRT	rs41310016	0	tolerated(0.31)	possibly_damaging(0.451)	NR	none	NR	none
chr10:51582894	NCOA4	T	C	0.03333	synonymous_variant	LOW	NCOA4	rs41306524	0	-	-	NR	none	NR	none
chr15:66782048	MAP2K1	T	C	0.03333	splice_region_variant,intron_variant	LOW	MAP2K1	rs41306345,COSM3999588	0	-	-	NR	none	NR	Confirmed somatic variant				1
chr12:112891203	PTPN11	C	G	0.01111	intron_variant	MODIFIER	PTPN11	rs41304351	0	-	-	NR	none	NR	none
chr1:27057621	ARID1A	C	A	0.02222	intron_variant	MODIFIER	ARID1A	rs41303629	0	-	-	NR	none	NR	none
chr6:398965	IRF4	T	C	0.07778	intron_variant	MODIFIER	IRF4	rs41301853	0	-	-	NR	none	NR	none
chr1:206650065	IKBKE	G	A	0.01111	synonymous_variant	LOW	IKBKE	rs41296034	0	-	-	NR	none	NR	none
chr2:47702191	MSH2	G	A	0.01111	missense_variant	MODERATE	MSH2	rs41295288,CM994603,COSM5967465	0	tolerated(0.54)	benign(0.059)	NR	none	NR	none
chr11:534332	HRAS	A	G	0.01111	5_prime_UTR_variant	MODIFIER	HRAS	rs41294870	0	-	-	NR	none	NR	none
chr6:152497500	SYNE1	T	C	0.08889	intron_variant	MODIFIER	SYNE1	rs41292868	0	-	-	NR	none	NR	none
chr10:104161724	NFKB2	G	A	0.01111	intron_variant	MODIFIER	NFKB2	rs41287457	0	-	-	NR	none	NR	none
chr5:149509446	PDGFRB	T	C	0.01667	missense_variant	MODERATE	PDGFRB	rs41287110	0	tolerated(0.61)	benign(0.034)	NR	none	NR	none
chr5:149460355	CSF1R	A	G	0.005556	synonymous_variant	LOW	CSF1R	rs41287102,COSM5495001	0	-	-	NR	none	NR	none
chr6:135511504	MYB	T	A	0.01667	intron_variant	MODIFIER	MYB	rs41287046	0	-	-	NR	none	NR	none
chr17:38508756	RARA	T	C	0.01667	synonymous_variant	LOW	RARA	rs41283421	0	-	-	NR	none	NR	none
chr7:140500135	BRAF	T	C	0.06667	intron_variant	MODIFIER	BRAF	rs41282721	0	-	-	NR	none	NR	none
chr9:8340491	PTPRD	T	G	0.01667	intron_variant	MODIFIER	PTPRD	rs41281781	0	-	-	NR	none	NR	none
chr2:24949602	NCOA1	C	A	0.005556	intron_variant	MODIFIER	NCOA1	rs41281517	0	-	-	NR	none	NR	none
chr2:24920663	NCOA1	G	A	0.005556	synonymous_variant	LOW	NCOA1	rs41281513	0	-	-	NR	none	NR	none
chr20:41101180	PTPRT	A	G	0.02222	synonymous_variant	LOW	PTPRT	rs41279258	0	-	-	NR	none	NR	none
chr12:112915434	PTPN11	T	C	0.05	intron_variant	MODIFIER	PTPN11	rs41279090	0	-	-	NR	none	NR	none
chr7:148506396	EZH2	C	A	0.005556	splice_region_variant,intron_variant	LOW	EZH2	rs41277434,COSM5020474	0	-	-	NR	none	NR	none
chr10:22022369	MLLT10	C	T	0.005556	intron_variant	MODIFIER	MLLT10	rs41277388	0	-	-	NR	none	NR	none
chr20:39791249	PLCG1	A	G	0.005556	intron_variant	MODIFIER	PLCG1	rs41277000	0	-	-	NR	none	NR	none
chr19:3110361	GNA11	T	C	0.01111	intron_variant	MODIFIER	GNA11	rs41276846	0	-	-	NR	none	NR	none
chr18:25593713	CDH2	C	G	0.01111	synonymous_variant	LOW	CDH2	rs41274322	0	-	-	NR	none	NR	none
chr6:56373536	DST	T	C	0.005556	missense_variant	MODERATE	DST	rs41271862	0	tolerated(0.13)	possibly_damaging(0.792)	NR	none	NR	none
chr6:56333747	DST	G	A	0.005556	intron_variant	MODIFIER	DST	rs41271852	0	-	-	NR	none	NR	none
chr6:32181517	NOTCH4	C	A	0.01667	synonymous_variant	LOW	NOTCH4	rs41270472	0	-	-	NR	none	NR	none
chr3:187449447	BCL6	T	C	0.01111	intron_variant	MODIFIER	BCL6	rs41268623	0	-	-	NR	none	NR	none
chr5:67593432	PIK3R1	T	C	0.02222	3_prime_UTR_variant	MODIFIER	PIK3R1	rs41268435	0	-	-	NR	none	NR	none
chr11:534197	HRAS	T	C	0.05	intron_variant	MODIFIER	HRAS	rs41258054	0	-	-	NR	none	NR	none
chr3:47125385	SETD2	A	G	0.3889	missense_variant	MODERATE	SETD2	rs4082155,COSM149376	0	tolerated(0.31)	benign(0)	NR	none	NR	none
chr1:155162067	MUC1	T	C	0.09444	synonymous_variant	LOW	MUC1	rs4072037,CS099921	0	-	-	NR	none	NR	none
chr5:180053307	FLT4	G	A	0.01111	intron_variant	MODIFIER	FLT4	rs402647	0	-	-	NR	none	NR	none
chr10:70405855	TET1	G	A	0.4056	missense_variant	MODERATE	TET1	rs3998860	0	tolerated(0.09)	benign(0.01)	NR	none	NR	none
chr12:49427266	MLL2	TGC	-	0.005556	inframe_insertion	MODERATE	KMT2D	rs398123707,TMP_ESP_12_49427266_49427271	0	-	-	NR	none	NR	none
chr14:95566104	DICER1	A	C	0.01111	intron_variant	MODIFIER	DICER1	rs398043696	0	-	-	NR	none	NR	none
chr6:51640751	PKHD1	G	C	0.1056	intron_variant	MODIFIER	PKHD1	rs3920621	0	-	-	NR	none	NR	none
chr19:45867676	ERCC2	A	C	0.005556	splice_region_variant,intron_variant	LOW	ERCC2	rs3916812	0	-	-	NR	none	NR	none
chr6:152658141	SYNE1	AC	CT	0.005556	missense_variant	MODERATE	SYNE1	rs386707192	0	-	benign(0.005)	NR	none	NR	none
chr5:149433596	CSF1R	GA	TG	0.1111	3_prime_UTR_variant	MODIFIER	CSF1R	rs386693509	0	-	-	NR	none	NR	none
chr3:10106532	FANCD2	T	C	0.05556	missense_variant	MODERATE	FANCD2	rs3864017	0	tolerated(0.31)	benign(0)	NR	none	NR	none
chr11:69462856	CCND1	T	C	0.01111	synonymous_variant	LOW	CCND1	rs3862792	0	-	-	NR	none	NR	none
chr3:12475557	PPARG	T	C	0.02778	synonymous_variant	LOW	PPARG	rs3856806,CM994587	0	-	-	NR	none	NR	none
chr3:41275350	CTNNB1	T	C	0.01111	synonymous_variant	LOW	CTNNB1	rs3856748	0	-	-	NR	none	NR	none
chr1:144854597	PDE4DIP	C	T	0.02778	synonymous_variant	LOW	PDE4DIP	rs3851873	0	-	-	NR	none	NR	none
chr1:144854537	PDE4DIP	C	T	0.1444	synonymous_variant	LOW	PDE4DIP	rs3851872	0	-	-	NR	none	NR	none
chr9:8338878	PTPRD	C	A	0.04444	intron_variant	MODIFIER	PTPRD	rs3847286	0	-	-	NR	none	NR	none
chr22:36708050	MYH9	-	TCCTGTGA	0.01667	intron_variant	MODIFIER	MYH9	rs3842715	0	-	-	NR	none	NR	none
chr1:186326758	TPR	-	A	0.01111	splice_region_variant,intron_variant	LOW	TPR	rs3841803	0	-	-	NR	none	NR	none
chr15:99467943	IGF1R	-	GT	0.1167	intron_variant	MODIFIER	IGF1R	rs3841650	0	-	-	NR	none	NR	none
chr5:180055862	FLT4	G	T	0.2056	intron_variant	MODIFIER	FLT4	rs383985	0	-	-	NR	none	NR	none
chr4:55151959	PDGFRA	A	-	0.1833	intron_variant	MODIFIER	PDGFRA	rs3830355	0	-	-	NR	none	NR	none
chr5:149456811	CSF1R	A	G	0.04444	intron_variant	MODIFIER	CSF1R	rs3829987	0	-	-	NR	none	NR	none
chr1:204416501	PIK3C2B	T	C	0.005556	intron_variant	MODIFIER	PIK3C2B	rs3827534	0	-	-	NR	none	NR	none
chr10:104359350	SUFU	C	T	0.04444	intron_variant	MODIFIER	SUFU	rs3824756	0	-	-	NR	none	NR	none
chr8:41906095	KAT6A	G	A	0.05	missense_variant	MODERATE	KAT6A	rs3824276	0	tolerated(0.12)	benign(0.001)	NR	none	NR	none
chr8:41798417	KAT6A	T	C	0.01667	synonymous_variant	LOW	KAT6A	rs3824275	0	-	-	NR	none	NR	none
chr3:37695192	ITGA9	A	G	0.07778	intron_variant	MODIFIER	ITGA9	rs3821909	0	-	-	NR	none	NR	none
chr2:24962252	NCOA1	A	G	0.05556	intron_variant	MODIFIER	NCOA1	rs3820933	0	-	-	NR	none	NR	none
chr1:147091972	BCL9	T	C	0.03333	missense_variant	MODERATE	BCL9	rs3820129	0	deleterious(0.03)	benign(0.037)	NR	none	NR	none
chr9:8521244	PTPRD	T	C	0.1222	intron_variant	MODIFIER	PTPRD	rs3818346	0	-	-	NR	none	NR	none
chr22:41523770	EP300	A	G	0.005556	intron_variant	MODIFIER	EP300	rs3818120	0	-	-	NR	none	NR	none
chr6:152461061	SYNE1	A	G	0.05	intron_variant	MODIFIER	SYNE1	rs3818110	0	-	-	NR	none	NR	none
chr14:92473943	TRIP11	C	T	0.2833	intron_variant	MODIFIER	TRIP11	rs3818095	0	-	-	NR	none	NR	none
chr4:103534560	NFKB1	G	C	0.2111	intron_variant	MODIFIER	NFKB1	rs3817685	0	-	-	NR	none	NR	none
chr2:61719275	XPO1	C	T	0.02222	synonymous_variant	LOW	XPO1	rs3816341	0	-	-	NR	none	NR	none
chr7:124481245	POT1	A	G	0.1278	intron_variant	MODIFIER	POT1	rs3815221	0	-	-	NR	none	NR	none
chr10:70332066	TET1	T	C	0.1167	5_prime_UTR_variant	MODIFIER	TET1	rs3814177	0	-	-	NR	none	NR	none
chr17:45385012	ITGB3	T	C	0.2056	intron_variant	MODIFIER	ITGB3	rs3809863	0	-	-	NR	none	NR	none
chr6:152529260	SYNE1	A	G	0.1167	synonymous_variant	LOW	SYNE1	rs3798756	0	-	-	NR	none	NR	none
chr4:106158216	TET2	A	G	0.02222	synonymous_variant	LOW	TET2	rs3796927,COSM4415179	0	-	-	NR	none	NR	none
chr2:216283958	FN1	A	T	0.1	splice_region_variant,intron_variant	LOW	FN1	rs3796123	0	-	-	NR	none	NR	none
chr2:29445458	ALK	T	G	0.1278	synonymous_variant	LOW	ALK	rs3795850,COSM5351767	0	-	-	NR	none	NR	Confirmed somatic variant				1
chr3:89456555	EPHA3	A	T	0.2722	intron_variant	MODIFIER	EPHA3	rs3792572	0	-	-	NR	none	NR	none
chr2:141771058	LRP1B	A	T	0.05556	intron_variant	MODIFIER	LRP1B	rs3791766	0	-	-	NR	none	NR	none
chr2:212286934	ERBB4	T	A	0.05	intron_variant	MODIFIER	ERBB4	rs3791709	0	-	-	NR	none	NR	none
chr16:65005395	CDH11	C	T	0.005556	intron_variant	MODIFIER	CDH11	rs3785315	0	-	-	NR	none	NR	none
chr14:81574959	TSHR	A	G	0.3833	intron_variant	MODIFIER	TSHR	rs3783942	0	-	-	NR	none	NR	none
chr14:81575005	TSHR	C	A	0.3833	intron_variant	MODIFIER	TSHR	rs3783941	0	-	-	NR	none	NR	none
chr12:49427652	MLL2	T	C	0.01667	synonymous_variant	LOW	KMT2D	rs3782357,COSM431203	0	-	-	NR	none	NR	none
chr9:36840623	PAX5	A	G	0.2889	synonymous_variant	LOW	PAX5	rs3780135,COSM4163845	0	-	-	NR	none	NR	none
chr2:219562685	STK36	T	C	0.005556	synonymous_variant	LOW	STK36	rs377733874	0	-	-	NR	none	NR	none
chr22:41574892	EP300	G	C	0.005556	missense_variant	MODERATE	EP300	rs377508897,COSM5020743	0	deleterious_low_confidence(0.01)	benign(0.344)	NR	PATHOGENIC	NR	none		1
chr20:39792344	PLCG1	C	T	0.005556	intron_variant	MODIFIER	PLCG1	rs377445422	0	-	-	NR	none	NR	none
chr6:56484782	DST	T	C	0.005556	intron_variant	MODIFIER	DST	rs377356403	0	-	-	NR	none	NR	none
chr21:36164891	RUNX1	C	T	0.005556	synonymous_variant	LOW	RUNX1	rs377305704	0	-	-	NR	none	NR	none
chr3:46486810	LTF	G	A	0.005556	missense_variant	MODERATE	LTF	rs377248291	0	deleterious(0.01)	benign(0.441)	NR	none	NR	none
chr12:6787651	ZNF384	A	G	0.005556	intron_variant	MODIFIER	ZNF384	rs377154851	0	-	-	NR	none	NR	none
chr10:98002435	BLNK	G	A	0.01111	intron_variant	MODIFIER	BLNK	rs377149860	0	-	-	NR	none	NR	none
chr3:47125398	SETD2	G	C	0.005556	missense_variant	MODERATE	SETD2	rs377115716	0	tolerated(1)	benign(0)	NR	none	NR	none
chr12:49439809	MLL2	A	T	0.005556	intron_variant	MODIFIER	KMT2D	rs377057640	0	-	-	NR	none	NR	none
chr9:32633594	TAF1L	C	T	0.005556	missense_variant	MODERATE	TAF1L	rs376973127	0	deleterious(0)	benign(0.031)	NR	none	NR	none
chr4:55575668	KIT	T	C	0.005556	synonymous_variant	LOW	KIT	rs376940990	0	-	-	NR	none	NR	none
chr1:85733374	BCL10	T	C	0.06111	missense_variant	MODERATE	BCL10	rs3768235	0	tolerated(0.28)	benign(0)	NR	none	NR	none
chr4:88046113	AFF1	G	T	0.005556	intron_variant	MODIFIER	AFF1	rs376777716	0	-	-	NR	none	NR	none
chr5:176517797	FGFR4	C	T	0.3833	missense_variant	MODERATE	FGFR4	rs376618	0	tolerated(0.7)	benign(0)	NR	none	NR	none
chr8:145740297	RECQL4	C	T	0.005556	upstream_gene_variant	MODIFIER	LRRC14	rs376495311	0	-	-	NR	none	NR	none
chr12:43833416	ADAMTS20	G	C	0.005556	intron_variant	MODIFIER	ADAMTS20	rs3764469	0	-	-	NR	none	NR	none
chr22:41572568	EP300	T	C	0.005556	intron_variant	MODIFIER	EP300	rs376408346	0	-	-	NR	none	NR	none
chr5:176517740	FGFR4	T	A	0.02222	splice_region_variant,intron_variant	LOW	FGFR4	rs376400659	0	-	-	NR	none	NR	none
chr9:8518395	PTPRD	A	G	0.03889	synonymous_variant	LOW	PTPRD	rs3763653	0	-	-	NR	none	NR	none
chr9:139405278	NOTCH1	A	G	0.005556	intron_variant	MODIFIER	NOTCH1	rs376232432	0	-	-	NR	none	NR	none
chr9:135985796	RALGDS	T	C	0.2167	synonymous_variant	LOW	RALGDS	rs3761824,COSM4163475,COSM4163476,COSM4163477,COSM4163478	0	-	-	NR	PATHOGENIC	NR	Confirmed somatic variant		1		1
chr3:195606019	TNK2	A	G	0.005556	synonymous_variant	LOW	TNK2	rs3761718	0	-	-	NR	none	NR	none
chr17:45380002	ITGB3	C	T	0.04444	intron_variant	MODIFIER	ITGB3	rs3760372	0	-	-	NR	none	NR	none
chr2:209106667	IDH1	A	G	0.005556	intron_variant	MODIFIER	IDH1	rs375976483	0	-	-	NR	none	NR	none
chr6:152841662	SYNE1	A	G	0.005556	missense_variant	MODERATE	SYNE1	rs375917264,COSM3859755,COSM3859756,COSM3859757,COSM3859758,COSM3859759	0	-	probably_damaging(0.956)	NR	PATHOGENIC	NR	Confirmed somatic variant		1		1
chr7:91630490	AKAP9	G	A	0.005556	missense_variant	MODERATE	AKAP9	rs375876545	0	tolerated(0.06)	benign(0.085)	NR	none	NR	none
chr10:96602623	CYP2C19	A	G	0.02778	missense_variant	MODERATE	CYP2C19	rs3758581,CM983294	0	tolerated(1)	benign(0.007)	NR	none	NR	none
chr10:96602622	CYP2C19	T	C	0.06111	synonymous_variant	LOW	CYP2C19	rs3758580	0	-	-	NR	none	NR	none
chr7:138200117	TRIM24	T	A	0.1889	intron_variant	MODIFIER	TRIM24	rs3757381	0	-	-	NR	none	NR	none
chr6:69758072	BAI3	T	A	0.03333	splice_region_variant,intron_variant	LOW	BAI3	rs3757049	0	-	-	NR	none	NR	none
chr19:1218442	STK11	A	G	0.005556	missense_variant	MODERATE	STK11	rs375622587	0	tolerated(0.27)	benign(0.007)	NR	none	NR	none
chr17:78341775	RNF213	T	C	0.005556	missense_variant	MODERATE	RNF213	rs375587766	0	tolerated(0.23)	benign(0.029)	NR	none	NR	none
chr3:52643685	PBRM1	C	T	0.3167	synonymous_variant	LOW	PBRM1	rs3755806,COSM1566684	0	-	-	NR	none	NR	Confirmed somatic variant				1
chr3:89468375	EPHA3	G	A	0.005556	missense_variant	MODERATE	EPHA3	rs375432691	0	tolerated(0.12)	probably_damaging(0.992)	NR	none	NR	none
chr1:186316488	TPR	T	C	0.01111	missense_variant	MODERATE	TPR	rs3753565	0	tolerated(0.11)	possibly_damaging(0.63)	NR	none	NR	none
chr1:186316656	TPR	C	G	0.2278	intron_variant	MODIFIER	TPR	rs3753564	0	-	-	NR	none	NR	none
chr1:27105838	ARID1A	A	G	0.005556	missense_variant	MODERATE	ARID1A	rs375250508,COSM4236208	0	deleterious(0.04)	benign(0.306)	NR	PATHOGENIC	NR	Confirmed somatic variant		1		1
chr22:36710183	MYH9	C	T	0.3889	splice_region_variant,intron_variant	LOW	MYH9	rs3752462	0	-	-	NR	none	NR	none
chr16:89805604	FANCA	A	G	0.005556	synonymous_variant	LOW	FANCA	rs375237681	0	-	-	NR	none	NR	none
chr8:37695302	GPR124	C	T	0.005556	missense_variant	MODERATE	GPR124	rs375163748	0	tolerated(0.06)	benign(0.091)	NR	none	NR	none
chr13:29041007	FLT1	T	A	0.01111	intron_variant	MODIFIER	FLT1	rs3751398	0	-	-	NR	none	NR	none
chr6:152557221	SYNE1	G	A	0.005556	intron_variant	MODIFIER	SYNE1	rs375129693	0	-	-	NR	none	NR	none
chr11:71726168	NUMA1	C	G	0.005556	missense_variant	MODERATE	NUMA1	rs3750913	0	deleterious(0.02)	benign(0.043)	NR	none	NR	none
chr1:155159991	MUC1	A	G	0.02222	synonymous_variant	LOW	MUC1	rs375090196	0	-	-	NR	none	NR	none
chr4:41749587	PHOX2B	T	A	0.02222	intron_variant	MODIFIER	PHOX2B	rs375025625	0	-	-	NR	none	NR	none
chr6:91228939	MAP3K7	-	GAA	0.01111	intron_variant	MODIFIER	MAP3K7	rs374993243	0	-	-	NR	none	NR	none
chr9:139401238	NOTCH1	A	G	0.01111	synonymous_variant	LOW	NOTCH1	rs374989581,COSM6495241	0	-	-	NR	none	NR	none
chr8:145740370	RECQL4	A	G	0.005556	upstream_gene_variant	MODIFIER	LRRC14	rs374965803	0	-	-	NR	none	NR	none
chr2:141571329	LRP1B	C	T	0.3389	synonymous_variant	LOW	LRP1B	rs3749010,COSM4133144	0	-	-	NR	none	NR	Confirmed somatic variant				1
chr2:212251864	ERBB4	C	T	0.1444	synonymous_variant	LOW	ERBB4	rs3748962,COSM3757923	0	-	-	NR	none	NR	none
chr2:141027926	LRP1B	G	A	0.06111	intron_variant	MODIFIER	LRP1B	rs3748865	0	-	-	NR	none	NR	none
chr7:13935509	ETV1	A	G	0.01111	synonymous_variant	LOW	ETV1	rs374879140	0	-	-	NR	none	NR	none
chr1:206669465	IKBKE	T	C	0.07778	missense_variant	MODERATE	IKBKE	rs3748022,CM136351	0	tolerated(0.08)	benign(0.022)	NR	none	NR	none
chr3:195615376	TNK2	G	A	0.01667	synonymous_variant	LOW	TNK2	rs3747669	0	-	-	NR	none	NR	none
chr1:204403659	PIK3C2B	G	A	0.1389	synonymous_variant	LOW	PIK3C2B	rs3747636	0	-	-	NR	none	NR	none
chr19:18876309	CRTC1	G	A	0.08333	missense_variant	MODERATE	CRTC1	rs3746266	0	deleterious(0.01)	benign(0.047)	NR	none	NR	none
chr19:3114864	GNA11	T	C	0.005556	intron_variant	MODIFIER	GNA11	rs3746069	0	-	-	NR	none	NR	none
chr12:132546659	EP400	T	C	0.005556	missense_variant	MODERATE	EP400	rs374438318	0	deleterious_low_confidence(0.04)	possibly_damaging(0.902)	NR	none	NR	none
chr17:17124815	FLCN	T	C	0.06111	intron_variant	MODIFIER	FLCN	rs3744124	0	-	-	NR	none	NR	none
chr17:17127470	FLCN	T	C	0.06111	intron_variant	MODIFIER	FLCN	rs3744123	0	-	-	NR	none	NR	none
chr1:154947194	CKS1B	A	G	0.005556	5_prime_UTR_variant	MODIFIER	CKS1B	rs374349593	0	-	-	NR	none	NR	none
chr15:99465473	IGF1R	T	C	0.005556	synonymous_variant	LOW	IGF1R	rs3743262,CM105034	0	-	-	NR	none	NR	none
chr14:92436176	TRIP11	T	C	0.005556	synonymous_variant	LOW	TRIP11	rs3742719	0	-	-	NR	none	NR	none
chr12:49425978	MLL2	C	T	0.02778	synonymous_variant	LOW	KMT2D	rs3741622,COSM147495	0	-	-	NR	none	NR	none
chr11:44257802	EXT2	C	T	0.005556	intron_variant	MODIFIER	EXT2	rs3740878,CR072302	0	-	-	NR	none	NR	none
chr11:22647366	FANCF	A	G	0.04444	5_prime_UTR_variant	MODIFIER	FANCF	rs3740615	0	-	-	NR	none	NR	none
chr10:76788860	KAT6B	T	C	0.01111	synonymous_variant	LOW	KAT6B	rs3740322	0	-	-	NR	none	NR	none
chr10:76789077	KAT6B	A	G	0.05556	missense_variant	MODERATE	KAT6B	rs3740321	0	tolerated_low_confidence(0.15)	benign(0.021)	NR	none	NR	none
chr17:41606995	ETV4	A	G	0.005556	synonymous_variant	LOW	ETV4	rs373939840	0	-	-	NR	none	NR	none
chr8:41791283	KAT6A	A	G	0.04444	synonymous_variant	LOW	KAT6A	rs3739365	0	-	-	NR	none	NR	none
chr2:29432776	ALK	C	T	0.005556	intron_variant	MODIFIER	ALK	rs3738867	0	-	-	NR	none	NR	none
chr1:162741794	DDR2	T	C	0.02778	intron_variant	MODIFIER	DDR2	rs3738807	0	-	-	NR	none	NR	none
chr1:147087721	BCL9	A	T	0.2278	intron_variant	MODIFIER	BCL9	rs3737843	0	-	-	NR	none	NR	none
chr1:220825543	MARK1	C	T	0.005556	intron_variant	MODIFIER	MARK1	rs3737297	0	-	-	NR	none	NR	none
chr1:220825523	MARK1	G	A	0.03889	intron_variant	MODIFIER	MARK1	rs3737296	0	-	-	NR	none	NR	none
chr14:95574314	DICER1	T	C	0.01667	synonymous_variant	LOW	DICER1	rs373715574	0	-	-	NR	none	NR	none
chr1:65311214	JAK1	C	G	0.01667	synonymous_variant	LOW	JAK1	rs3737139,COSM5019856	0	-	-	NR	PATHOGENIC	NR	Confirmed somatic variant		1		1
chr8:90955655	NBN	A	T	0.01667	intron_variant	MODIFIER	NBN	rs3736640	0	-	-	NR	none	NR	none
chr8:90955624	NBN	A	T	0.1444	intron_variant	MODIFIER	NBN	rs3736639	0	-	-	NR	none	NR	none
chr5:180052946	FLT4	A	G	0.01667	synonymous_variant	LOW	FLT4	rs3736062	0	-	-	NR	none	NR	none
chr8:113694624	CSMD3	C	T	0.005556	intron_variant	MODIFIER	CSMD3	rs373595593	0	-	-	NR	none	NR	none
chr17:41606098	ETV4	T	C	0.01111	missense_variant	MODERATE	ETV4	rs373515634	0	deleterious(0)	probably_damaging(0.999)	NR	none	NR	none
chr7:151949068	MLL3	G	C	0.005556	missense_variant	MODERATE	KMT2C	rs3735156,COSM5009482	0	tolerated(1)	benign(0)	NR	none	NR	none
chr7:2962293	CARD11	G	C	0.01111	synonymous_variant	LOW	CARD11	rs3735131,COSM4768833	0	-	-	NR	none	NR	Confirmed somatic variant				1
chr7:2959172	CARD11	A	G	0.02222	synonymous_variant	LOW	CARD11	rs3735126,COSM5019286	0	-	-	NR	PATHOGENIC	NR	Confirmed somatic variant		1		1
chr7:2957005	CARD11	C	T	0.1056	synonymous_variant	LOW	CARD11	rs3735124,COSM5019288	0	-	-	NR	none	NR	Confirmed somatic variant				1
chr7:2956918	CARD11	A	C	0.02222	splice_region_variant,intron_variant	LOW	CARD11	rs3735123,COSM5019356	0	-	-	NR	none	NR	Confirmed somatic variant				1
chr5:112176209	APC	T	C	0.005556	missense_variant	MODERATE	APC	rs373440614,CM942083,COSM4127116	0	tolerated(0.18)	probably_damaging(1)	NR	none	NR	Confirmed somatic variant				1
chr6:152651759	SYNE1	G	C	0.03333	synonymous_variant	LOW	SYNE1	rs3734365	0	-	-	NR	none	NR	none
chr11:3726519	NUP98	T	C	0.005556	missense_variant	MODERATE	NUP98	rs373422722	0	tolerated(0.49)	benign(0.001)	NR	none	NR	none
chr5:176637240	NSD1	T	G	0.005556	missense_variant	MODERATE	NSD1	rs3733875,COSM4416946,COSM4416947	0	tolerated_low_confidence(0.7)	benign(0.001)	NR	none	NR	Confirmed somatic variant				1
chr5:176637149	NSD1	A	G	0.08889	synonymous_variant	LOW	NSD1	rs3733874	0	-	-	NR	none	NR	none
chr3:38180452	MYD88	T	C	0.005556	synonymous_variant	LOW	MYD88	rs373382593	0	-	-	NR	none	NR	none
chr4:106190862	TET2	C	T	0.01667	synonymous_variant	LOW	TET2	rs3733609,COSM4605320	0	-	-	NR	none	NR	Confirmed somatic variant				1
chr4:55161254	PDGFRA	T	C	0.3222	intron_variant	MODIFIER	PDGFRA	rs3733540	0	-	-	NR	none	NR	none
chr4:88029482	AFF1	G	C	0.03333	intron_variant	MODIFIER	AFF1	rs3733377	0	-	-	NR	none	NR	none
chr3:52643307	PBRM1	G	A	0.1	intron_variant	MODIFIER	PBRM1	rs3733045	0	-	-	NR	none	NR	none
chr3:10070336	FANCD2	C	G	0.02778	5_prime_UTR_variant	MODIFIER	FANCD2	rs3732974	0	-	-	NR	none	NR	none
chr3:37783235	ITGA9	A	G	0.005556	missense_variant	MODERATE	ITGA9	rs373225022	0	tolerated(0.31)	benign(0.013)	NR	none	NR	none
chr2:61749690	XPO1	T	C	0.02778	intron_variant	MODIFIER	XPO1	rs3732171	0	-	-	NR	none	NR	none
chr2:61749716	XPO1	T	C	0.02778	intron_variant	MODIFIER	XPO1	rs3732170	0	-	-	NR	none	NR	none
chr12:69233095	MDM2	G	C	0.005556	synonymous_variant	LOW	MDM2	rs373214952,COSM4990297,COSM4990298	0	-	-	NR	none	NR	Confirmed somatic variant				1
chr2:223065870	PAX3	G	C	0.01111	3_prime_UTR_variant	MODIFIER	PAX3	rs3731858	0	-	-	NR	none	NR	none
chr2:24929851	NCOA1	T	A	0.07222	synonymous_variant	LOW	NCOA1	rs3731628	0	-	-	NR	none	NR	none
chr7:92244631	CDK6	-	ATACA	0.02222	intron_variant	MODIFIER	CDK6	rs3731387	0	-	-	NR	none	NR	none
chr7:92247327	CDK6	T	G	0.005556	intron_variant	MODIFIER	CDK6	rs3731375	0	-	-	NR	none	NR	none
chr9:21970916	CDKN2A	T	C	0.01667	missense_variant	MODERATE	CDKN2A	rs3731249,CM004869,COSM3736958,COSM3774361,COSM3774362	0	deleterious_low_confidence(0)	benign(0.019)	NR	none	NR	Confirmed somatic variant				1
chr1:9777576	PIK3CD	G	C	0.01111	intron_variant	MODIFIER	PIK3CD	rs373116206	0	-	-	NR	none	NR	none
chr3:14211865	XPC	A	C	0.05	intron_variant	MODIFIER	XPC	rs3731081	0	-	-	NR	none	NR	none
chr17:45360734	ITGB3	T	C	0.01667	synonymous_variant	LOW	ITGB3	rs373101628	0	-	-	NR	none	NR	none
chr7:98534927	TRRAP	A	G	0.005556	intron_variant	MODIFIER	TRRAP	rs373060016	0	-	-	NR	none	NR	none
chr1:11194591	MTOR	A	G	0.01111	intron_variant	MODIFIER	MTOR	rs3730381	0	-	-	NR	none	NR	none
chr14:105241378	AKT1	T	C	0.03333	intron_variant	MODIFIER	AKT1	rs3730346	0	-	-	NR	none	NR	none
chr20:57480420	GNAS	C	T	0.04444	intron_variant	MODIFIER	GNAS	rs3730170	0	-	-	NR	none	NR	none
chr20:57478939	GNAS	A	G	0.03333	intron_variant	MODIFIER	GNAS	rs3730168	0	-	-	NR	none	NR	none
chr5:67588148	PIK3R1	A	G	0.09444	missense_variant	MODERATE	PIK3R1	rs3730089,CM080497,COSM3727824	0	tolerated(0.41)	benign(0)	NR	PATHOGENIC	NR	Confirmed somatic variant		1		1
chr5:67593363	PIK3R1	C	T	0.01111	synonymous_variant	LOW	PIK3R1	rs3729981,COSM7113767	0	-	-	NR	none	NR	none
chr22:22162126	MAPK1	G	A	0.02778	synonymous_variant	LOW	MAPK1	rs3729910	0	-	-	NR	none	NR	none
chr3:138413666	PIK3CB	A	G	0.005556	synonymous_variant	LOW	PIK3CB	rs3729780	0	-	-	NR	none	NR	none
chr5:38496637	LIFR	T	C	0.005556	missense_variant	MODERATE	LIFR	rs3729740,COSM162154,COSM4809828	0	tolerated(0.51)	benign(0)	NR	none	NR	Confirmed somatic variant				1
chr5:38499764	LIFR	A	G	0.005556	intron_variant	MODIFIER	LIFR	rs3729737	0	-	-	NR	none	NR	none
chr5:38527308	LIFR	A	G	0.02778	missense_variant	MODERATE	LIFR	rs3729734	0	tolerated(0.18)	benign(0)	NR	none	NR	none
chr3:138456726	PIK3CB	A	G	0.005556	splice_region_variant,synonymous_variant	LOW	PIK3CB	rs3729699	0	-	-	NR	none	NR	none
chr7:98602986	TRRAP	T	C	0.005556	intron_variant	MODIFIER	TRRAP	rs372910435	0	-	-	NR	none	NR	none
chr10:70405148	TET1	C	T	0.005556	synonymous_variant	LOW	TET1	rs372758091,COSM3935142	0	-	-	NR	none	NR	Confirmed somatic variant				1
chr16:2124412	TSC2	A	G	0.005556	intron_variant	MODIFIER	TSC2	rs372755942	0	-	-	NR	none	NR	none
chr10:70404949	TET1	T	C	0.005556	synonymous_variant	LOW	TET1	rs372492171	0	-	-	NR	none	NR	none
chr14:51259587	NIN	C	T	0.01111	missense_variant	MODERATE	NIN	rs372334376	0	deleterious(0)	probably_damaging(0.91)	NR	none	NR	none
chr3:188426196	LPP	A	G	0.01111	intron_variant	MODIFIER	LPP	rs372319831	0	-	-	NR	none	NR	none
chr9:22006060	CDKN2B	A	G	0.005556	synonymous_variant	LOW	CDKN2B	rs372284765	0	-	-	NR	none	NR	none
chr13:113975948	LAMP1	A	G	0.005556	synonymous_variant	LOW	LAMP1	rs372087869	0	-	-	NR	none	NR	none
chr3:65433662	MAGI1	A	G	0.005556	intron_variant	MODIFIER	MAGI1	rs372018448	0	-	-	NR	none	NR	none
chr11:69455962	CCND1	T	C	0.005556	5_prime_UTR_variant	MODIFIER	CCND1	rs371975839	0	-	-	NR	none	NR	none
chr15:40914279	CASC5	G	A	0.005556	missense_variant	MODERATE	CASC5	rs371943910	0	tolerated(0.2)	possibly_damaging(0.528)	NR	none	NR	none
chr8:114111084	CSMD3	C	G	0.005556	missense_variant	MODERATE	CSMD3	rs371855136,COSM1623547,COSM1623548	0	deleterious(0.02)	possibly_damaging(0.565)	NR	PATHOGENIC	NR	none		1
chr4:1919880	WHSC1	G	A	0.005556	missense_variant	MODERATE	WHSC1	rs371529672	0	tolerated(0.72)	benign(0.003)	NR	none	NR	none
chr6:51712773	PKHD1	C	A	0.02222	splice_region_variant,intron_variant	LOW	PKHD1	rs371510537	0	-	-	NR	none	NR	none
chr17:17124664	FLCN	C	G	0.005556	intron_variant	MODIFIER	FLCN	rs371396942	0	-	-	NR	none	NR	none
chr3:142279235	ATR	G	C	0.005556	missense_variant	MODERATE	ATR	rs371350410	0	tolerated_low_confidence(0.26)	possibly_damaging(0.462)	NR	none	NR	none
chr9:135987420	RALGDS	T	C	0.005556	intron_variant	MODIFIER	RALGDS	rs371163663	0	-	-	NR	none	NR	none
chr9:134004650	NUP214	G	A	0.005556	intron_variant	MODIFIER	NUP214	rs371048875	0	-	-	NR	none	NR	none
chr13:28623524	FLT3	T	C	0.005556	missense_variant	MODERATE	FLT3	rs371030554,COSM6977168	0	tolerated(0.14)	benign(0.001)	NR	none	NR	Confirmed somatic variant				1
chr6:56483870	DST	T	C	0.005556	intron_variant	MODIFIER	DST	rs370912424,COSM1329599,COSM1329600	0	-	-	NR	none	NR	none
chr8:48840461	PRKDC	-	AAG	0.03333	intron_variant	MODIFIER	PRKDC	rs370706897	0	-	-	NR	none	NR	none
chr7:13940522	ETV1	C	T	0.005556	intron_variant	MODIFIER	ETV1	rs370696011	0	-	-	NR	none	NR	none
chr6:152443592	SYNE1	T	C	0.01667	synonymous_variant	LOW	SYNE1	rs370645510	0	-	-	NR	none	NR	none
chr6:152712428	SYNE1	A	C	0.005556	missense_variant	MODERATE	SYNE1	rs370644295,COSM5890226,COSM5890227,COSM5890228,COSM5890229,COSM5890230	0	-	possibly_damaging(0.689)	NR	PATHOGENIC	NR	Confirmed somatic variant		1		1
chr2:113994227	PAX8	A	C	0.02778	synonymous_variant	LOW	PAX8	rs370594115	0	-	-	NR	none	NR	none
chr15:99454581	IGF1R	A	G	0.01667	synonymous_variant	LOW	IGF1R	rs370500527,CM081310	0	-	-	NR	none	NR	none
chr6:56492121	DST	T	G	0.005556	intron_variant	MODIFIER	DST	rs370498103	0	-	-	NR	none	NR	none
chr3:138423298	PIK3CB	T	C	0.005556	missense_variant	MODERATE	PIK3CB	rs370267447	0	tolerated(0.54)	benign(0)	NR	none	NR	none
chr12:43771163	ADAMTS20	T	C	0.005556	splice_region_variant,intron_variant	LOW	ADAMTS20	rs370183028	0	-	-	NR	none	NR	none
chr3:52440427	BAP1	T	C	0.005556	intron_variant	MODIFIER	BAP1	rs369980498	0	-	-	NR	none	NR	none
chr11:44148547	EXT2	A	C	0.005556	intron_variant	MODIFIER	EXT2	rs369933447	0	-	-	NR	none	NR	none
chr3:142243071	ATR	T	C	0.005556	intron_variant	MODIFIER	ATR	rs369747235	0	-	-	NR	none	NR	none
chr8:113349063	CSMD3	A	G	0.005556	splice_region_variant,intron_variant	LOW	CSMD3	rs369645933,COSM3163613,COSM3163614	0	-	-	NR	none	NR	Confirmed somatic variant				1
chr22:42525791	CYP2D6	A	G	0.005556	missense_variant	MODERATE	CYP2D6	rs369390846	0	deleterious(0)	probably_damaging(1)	NR	none	NR	none
chr6:152793572	SYNE1	-	T	0.03889	intron_variant	MODIFIER	SYNE1	rs369316551	0	-	-	NR	none	NR	none
chr15:40897227	CASC5	C	T	0.005556	intron_variant	MODIFIER	CASC5	rs369277095	0	-	-	NR	none	NR	none
chr7:116414960	MET	T	C	0.005556	synonymous_variant	LOW	MET	rs369148519	0	-	-	NR	none	NR	none
chr14:95570259	DICER1	A	G	0.005556	synonymous_variant	LOW	DICER1	rs368984998	0	-	-	NR	none	NR	none
chr21:39795296	ERG	A	G	0.005556	intron_variant	MODIFIER	ERG	rs368808654	0	-	-	NR	none	NR	none
chr17:29654904	NF1	C	T	0.005556	intron_variant	MODIFIER	NF1	rs368734862	0	-	-	NR	none	NR	none
chr6:56507568	DST	C	T	0.005556	missense_variant	MODERATE	DST	rs368676961	0	tolerated_low_confidence(1)	benign(0.001)	NR	none	NR	none
chr6:56485241	DST	A	G	0.005556	intron_variant	MODIFIER	DST	rs368674616	0	-	-	NR	none	NR	none
chr12:57910569	DDIT3	T	G	0.005556	3_prime_UTR_variant	MODIFIER	DDIT3	rs368301051	0	-	-	NR	none	NR	none
chr2:190718651	PMS1	G	A	0.005556	intron_variant	MODIFIER	PMS1	rs368186524	0	-	-	NR	none	NR	none
chr8:30924558	WRN	C	A	0.005556	missense_variant	MODERATE	WRN	rs367991517,CM043620	0	tolerated(0.17)	benign(0.093)	NR	none	NR	none
chr5:67576710	PIK3R1	A	T	0.005556	intron_variant	MODIFIER	PIK3R1	rs367878034	0	-	-	NR	none	NR	none
chr19:11113622	SMARCA4	-	T	0.005556	intron_variant	MODIFIER	SMARCA4	rs367702037	0	-	-	NR	none	NR	none
chr6:32191730	NOTCH4	A	G	0.005556	5_prime_UTR_variant	MODIFIER	NOTCH4	rs367398	0	-	-	NR	none	NR	none
chr6:152558112	SYNE1	A	-	0.02778	intron_variant	MODIFIER	SYNE1	rs36215566	0	-	-	NR	none	NR	none
chr8:103311667	UBR5	G	T	0.01111	intron_variant	MODIFIER	UBR5	rs36178006	0	-	-	NR	none	NR	none
chr9:139405093	NOTCH1	A	G	0.005556	intron_variant	MODIFIER	NOTCH1	rs36119806	0	-	-	NR	none	NR	none
chr1:114969926	TRIM33	-	A	0.02778	intron_variant	MODIFIER	TRIM33	rs36115645,COSM5019220,COSM5019221,COSM5019222	0	-	-	NR	none	NR	none
chr3:10074646	FANCD2	C	G	0.005556	missense_variant	MODERATE	FANCD2	rs36084488	0	tolerated(0.07)	probably_damaging(0.976)	NR	none	NR	none
chr1:145535814	ITGA10	T	C	0.005556	missense_variant	MODERATE	ITGA10	rs36073645,COSM1168635	0	deleterious(0)	probably_damaging(1)	NR	none	NR	none
chr19:18876258	CRTC1	A	G	0.01111	missense_variant	MODERATE	CRTC1	rs36070283	0	tolerated(0.15)	benign(0.015)	NR	none	NR	none
chr1:220791729	MARK1	T	G	0.005556	synonymous_variant	LOW	MARK1	rs36024488	0	-	-	NR	none	NR	none
chr5:37815960	GDNF	T	C	0.005556	synonymous_variant	LOW	GDNF	rs36010631,CM005544	0	-	-	NR	none	NR	none
chr7:142566065	EPHB6	T	C	0.005556	missense_variant	MODERATE	EPHB6	rs35984674	0	deleterious(0)	benign(0.043)	NR	none	NR	none
chr15:41798142	LTK	T	C	0.01111	missense_variant	MODERATE	LTK	rs35932273	0	deleterious_low_confidence(0.05)	possibly_damaging(0.741)	NR	none	NR	none
chr7:100424587	EPHB4	-	G	0.02778	intron_variant	MODIFIER	EPHB4	rs35907339	0	-	-	NR	none	NR	none
chr15:91292917	BLM	G	A	0.005556	missense_variant	MODERATE	BLM	rs35886055	0	tolerated(0.11)	benign(0.115)	NR	none	NR	none
chr8:57078933	PLAG1	T	G	0.1389	missense_variant	MODERATE	PLAG1	rs35883156	0	tolerated(0.26)	benign(0.012)	NR	none	NR	none
chr5:176721119	NSD1	A	G	0.01667	missense_variant	MODERATE	NSD1	rs35848863	0	tolerated_low_confidence(0.34)	benign(0.015)	NR	none	NR	none
chr17:8053344	PER1	A	G	0.07778	synonymous_variant	LOW	PER1	rs35826160	0	-	-	NR	none	NR	none
chr2:141267573	LRP1B	A	G	0.005556	synonymous_variant	LOW	LRP1B	rs35821928,COSM5020025	0	-	-	NR	none	NR	Confirmed somatic variant				1
chr1:155160698	MUC1	T	A	0.07778	missense_variant	MODERATE	MUC1	rs35819649	0	deleterious(0)	probably_damaging(0.999)	NR	none	NR	none
chr11:3733899	NUP98	T	C	0.04444	synonymous_variant	LOW	NUP98	rs35803045	0	-	-	NR	none	NR	none
chr7:116339672	MET	T	C	0.1444	synonymous_variant	LOW	MET	rs35775721,COSM1579024	0	-	-	NR	none	NR	none
chr1:186303520	TPR	C	T	0.005556	missense_variant	MODERATE	TPR	rs35766045	0	tolerated(0.91)	benign(0.001)	NR	none	NR	none
chr11:106849400	GUCY1A2	A	G	0.005556	synonymous_variant	LOW	GUCY1A2	rs35760785	0	-	-	NR	none	NR	none
chr9:93606309	SYK	A	G	0.2	synonymous_variant	LOW	SYK	rs35758162	0	-	-	NR	none	NR	none
chr9:98209594	PTCH1	A	G	0.2167	missense_variant	MODERATE	PTCH1	rs357564,CM056376,COSM1638394	0	deleterious_low_confidence(0.01)	benign(0.444)	NR	none	NR	none
chr3:10081374	FANCD2	A	G	0.01111	intron_variant	MODIFIER	FANCD2	rs35749514	0	-	-	NR	none	NR	none
chr22:23627256	BCR	A	G	0.005556	synonymous_variant	LOW	BCR	rs35727393	0	-	-	NR	none	NR	none
chr1:47834209	CMPK1	T	G	0.005556	missense_variant	MODERATE	CMPK1	rs35687416	0	deleterious(0)	benign(0.229)	NR	none	NR	none
chr1:150551295	MCL1	C	T	0.02222	intron_variant	MODIFIER	MCL1	rs35661734	0	-	-	NR	none	NR	none
chr7:126410171	GRM8	C	G	0.1167	intron_variant	MODIFIER	GRM8	rs35648111	0	-	-	NR	none	NR	none
chr2:216248708	FN1	-	AA	0.2056	intron_variant	MODIFIER	FN1	rs35639338	0	-	-	NR	none	NR	none
chr7:100403131	EPHB4	A	C	0.005556	missense_variant	MODERATE	EPHB4	rs35638378	0	tolerated(0.61)	benign(0.001)	NR	none	NR	none
chr7:98582569	TRRAP	A	C	0.005556	splice_region_variant,synonymous_variant	LOW	TRRAP	rs35614868	0	-	-	NR	none	NR	none
chr15:40512906	BUB1B	G	A	0.03333	synonymous_variant	LOW	BUB1B	rs35611758	0	-	-	NR	none	NR	none
chr17:5433966	NLRP1	C	T	0.01111	missense_variant	MODERATE	NLRP1	rs35596958	0	tolerated(1)	benign(0)	NR	none	NR	none
chr6:152453291	SYNE1	A	G	0.01111	missense_variant	MODERATE	SYNE1	rs35591210	0	-	benign(0.007)	NR	none	NR	none
chr11:71717267	NUMA1	G	A	0.005556	missense_variant	MODERATE	NUMA1	rs35586429	0	tolerated(0.23)	benign(0.006)	NR	none	NR	none
chr11:108121464	ATM	C	T	0.005556	synonymous_variant	LOW	ATM	rs35578748	0	-	-	NR	none	NR	none
chr2:198281489	SF3B1	C	T	0.005556	synonymous_variant	LOW	SF3B1	rs35548172,COSM6494781	0	-	-	NR	none	NR	none
chr2:141116447	LRP1B	T	G	0.01111	missense_variant	MODERATE	LRP1B	rs35546150,COSM5019952,COSM6492449	0	tolerated(0.46)	benign(0)	NR	PATHOGENIC	NR	Confirmed somatic variant		1		1
chr7:124481185	POT1	A	C	0.01667	missense_variant	MODERATE	POT1	rs35536751	0	tolerated(0.14)	benign(0.001)	NR	none	NR	none
chr10:8100599	GATA3	T	C	0.03889	synonymous_variant	LOW	GATA3	rs35508267,COSM7319224	0	-	-	NR	none	NR	Confirmed somatic variant				1
chr5:251178	SDHA	A	G	0.03333	synonymous_variant	LOW	SDHA	rs35502109	0	-	-	NR	none	NR	none
chr2:198270017	SF3B1	C	T	0.01667	synonymous_variant	LOW	SF3B1	rs35493573	0	-	-	NR	none	NR	none
chr9:36846910	PAX5	T	C	0.02222	synonymous_variant	LOW	PAX5	rs35469494,COSM5020519	0	-	-	NR	none	NR	Confirmed somatic variant				1
chr5:225709	SDHA	A	G	0.01111	intron_variant	MODIFIER	SDHA	rs35464369	0	-	-	NR	none	NR	none
chr19:17945471	JAK3	A	G	0.005556	synonymous_variant	LOW	JAK3	rs35458530,COSM3773848	0	-	-	NR	none	NR	none
chr20:54945209	AURKA	A	G	0.005556	3_prime_UTR_variant	MODIFIER	AURKA	rs35436934	0	-	-	NR	none	NR	none
chr3:188326955	LPP	G	A	0.005556	missense_variant	MODERATE	LPP	rs35417432	0	tolerated(0.83)	benign(0)	NR	none	NR	none
chr6:91228934	MAP3K7	-	AAG	0.01111	intron_variant	MODIFIER	MAP3K7	rs35412199,TMP_ESP_6_91228934_91228936	0	-	-	NR	none	NR	none
chr11:3723781	NUP98	C	G	0.03889	missense_variant	MODERATE	NUP98	rs35404087,COSM6296737,COSM6296738	0	tolerated(0.29)	benign(0.108)	NR	none	NR	none
chr10:22002783	MLLT10	C	T	0.01111	synonymous_variant	LOW	MLLT10	rs35353908	0	-	-	NR	none	NR	none
chr2:216251697	FN1	A	G	0.005556	intron_variant	MODIFIER	FN1	rs35343655	0	-	-	NR	none	NR	none
chr8:103323902	UBR5	-	T	0.01111	intron_variant	MODIFIER	UBR5	rs35340325	0	-	-	NR	none	NR	none
chr10:123247550	FGFR2	A	G	0.01111	synonymous_variant	LOW	FGFR2	rs35337478	0	-	-	NR	none	NR	none
chr17:78337058	RNF213	C	G	0.1111	missense_variant	MODERATE	RNF213	rs35332090	0	deleterious(0.03)	benign(0.047)	NR	none	NR	none
chr1:220804451	MARK1	A	G	0.01667	synonymous_variant	LOW	MARK1	rs35322308	0	-	-	NR	none	NR	none
chr15:99442797	IGF1R	T	C	0.005556	synonymous_variant	LOW	IGF1R	rs35315829	0	-	-	NR	none	NR	none
chr5:235364	SDHA	T	C	0.01667	synonymous_variant	LOW	SDHA	rs35277230	0	-	-	NR	none	NR	none
chr15:39880277	THBS1	A	G	0.005556	synonymous_variant	LOW	THBS1	rs35275624	0	-	-	NR	none	NR	none
chr9:135977511	RALGDS	A	G	0.005556	synonymous_variant	LOW	RALGDS	rs35267131	0	-	-	NR	none	NR	none
chr17:45363546	ITGB3	T	G	0.02222	intron_variant	MODIFIER	ITGB3	rs35265764	0	-	-	NR	none	NR	none
chr6:166904212	RPS6KA2	T	C	0.02778	synonymous_variant	LOW	RPS6KA2	rs35257815	0	-	-	NR	none	NR	none
chr14:102552030	HSP90AA1	A	G	0.01111	intron_variant	MODIFIER	HSP90AA1	rs35241778	0	-	-	NR	none	NR	none
chr15:41797574	LTK	G	-	0.02222	intron_variant	MODIFIER	LTK	rs35233496,TMP_ESP_15_41797574_41797574	0	-	-	NR	none	NR	none
chr17:48275489	COL1A1	G	A	0.1444	intron_variant	MODIFIER	COL1A1	rs35231764	0	-	-	NR	none	NR	none
chr16:65015908	CDH11	G	C	0.08333	intron_variant	MODIFIER	CDH11	rs35214	0	-	-	NR	none	NR	none
chr16:65016087	CDH11	A	C	0.2778	missense_variant	MODERATE	CDH11	rs35213	0	tolerated(0.54)	benign(0.001)	NR	none	NR	none
chr16:65025658	CDH11	C	T	0.1333	intron_variant	MODIFIER	CDH11	rs35196	0	-	-	NR	none	NR	none
chr11:128651893	FLI1	G	A	0.04444	synonymous_variant	LOW	FLI1	rs35195224	0	-	-	NR	none	NR	none
chr16:65025718	CDH11	A	G	0.05556	missense_variant	MODERATE	CDH11	rs35195	0	deleterious(0.02)	possibly_damaging(0.849)	NR	none	NR	none
chr5:176520243	FGFR4	A	G	0.04444	missense_variant	MODERATE	FGFR4	rs351855,CM023917	0	tolerated(0.2)	possibly_damaging(0.7)	NR	none	NR	none
chr5:176522562	FGFR4	T	C	0.01111	synonymous_variant	LOW	FGFR4	rs351854	0	-	-	NR	none	NR	none
chr16:65038674	CDH11	A	G	0.01111	synonymous_variant	LOW	CDH11	rs35182	0	-	-	NR	none	NR	none
chr7:98515113	TRRAP	T	C	0.01111	synonymous_variant	LOW	TRRAP	rs35145380	0	-	-	NR	none	NR	none
chr3:89521693	EPHA3	C	T	0.05	missense_variant	MODERATE	EPHA3	rs35124509	0	tolerated(0.22)	benign(0)	NR	none	NR	none
chr4:62758491	LPHN3	A	G	0.005556	missense_variant	MODERATE	LPHN3	rs35106420	0	tolerated(0.36)	benign(0.045)	NR	none	NR	none
chr19:4099187	MAP2K2	C	T	0.02222	intron_variant	MODIFIER	MAP2K2	rs350911	0	-	-	NR	none	NR	none
chr6:152650903	SYNE1	A	G	0.005556	synonymous_variant	LOW	SYNE1	rs35085679	0	-	-	NR	none	NR	none
chr1:162749949	DDR2	T	G	0.005556	synonymous_variant	LOW	DDR2	rs35077871	0	-	-	NR	none	NR	none
chr19:10600418	KEAP1	A	G	0.005556	synonymous_variant	LOW	KEAP1	rs35074907,COSM5020974	0	-	-	NR	none	NR	Confirmed somatic variant				1
chr5:112178995	APC	G	A	0.005556	synonymous_variant	LOW	APC	rs35043160	0	-	-	NR	none	NR	none
chr14:92471669	TRIP11	C	T	0.01111	missense_variant	MODERATE	TRIP11	rs34967261	0	deleterious(0.02)	benign(0.135)	NR	none	NR	none
chr19:45261705	BCL3	T	C	0.02222	intron_variant	MODIFIER	BCL3	rs34967149	0	-	-	NR	none	NR	none
chr17:7578146	TP53	C	T	0.01111	intron_variant	MODIFIER	TP53	rs34949160,COSM45453	0	-	-	NR	none	NR	none
chr9:133747662	ABL1	A	G	0.005556	intron_variant	MODIFIER	ABL1	rs34938942	0	-	-	NR	none	NR	none
chr5:149447771	CSF1R	A	G	0.005556	splice_region_variant,intron_variant	LOW	CSF1R	rs34928010,COSM3683790,COSM3683791	0	-	-	NR	none	NR	Confirmed somatic variant				1
chrX:44922880	KDM6A	G	A	0.008	missense_variant	MODERATE	KDM6A	rs34922269	0	deleterious_low_confidence(0.04)	possibly_damaging(0.489)	NR	none	NR	none
chr14:92470606	TRIP11	T	C	0.01111	synonymous_variant	LOW	TRIP11	rs34919898	0	-	-	NR	none	NR	none
chr7:100403157	EPHB4	T	C	0.005556	missense_variant	MODERATE	EPHB4	rs34918225	0	tolerated(0.26)	probably_damaging(0.943)	NR	none	NR	none
chr10:8106135	GATA3	G	A	0.02222	intron_variant	MODIFIER	GATA3	rs34909898	0	-	-	NR	none	NR	none
chr14:92471202	TRIP11	C	T	0.01111	missense_variant	MODERATE	TRIP11	rs34805848	0	tolerated(0.61)	benign(0.003)	NR	none	NR	none
chr6:44221142	HSP90AB1	T	C	0.08333	intron_variant	MODIFIER	HSP90AB1	rs34776515	0	-	-	NR	none	NR	none
chr5:231042	SDHA	T	C	0.005556	synonymous_variant	LOW	SDHA	rs34771391	0	-	-	NR	none	NR	none
chr5:38528952	LIFR	-	AC	0.005556	intron_variant	MODIFIER	LIFR	rs34759137	0	-	-	NR	none	NR	none
chr8:103307434	UBR5	A	G	0.03333	splice_region_variant,synonymous_variant	LOW	UBR5	rs34739767	0	-	-	NR	none	NR	none
chr3:52437748	BAP1	C	A	0.005556	synonymous_variant	LOW	BAP1	rs34736117	0	-	-	NR	none	NR	none
chr17:5437285	NLRP1	A	G	0.02222	missense_variant	MODERATE	NLRP1	rs34733791	0	tolerated(0.11)	benign(0)	NR	none	NR	none
chr9:133759546	ABL1	A	G	0.01667	synonymous_variant	LOW	ABL1	rs34717358,COSM4407394	0	-	-	NR	none	NR	none
chr14:92471937	TRIP11	G	C	0.01111	missense_variant	MODERATE	TRIP11	rs34699762	0	tolerated(0.09)	benign(0.001)	NR	none	NR	none
chr1:27089446	ARID1A	C	G	0.02222	intron_variant	MODIFIER	ARID1A	rs34681611	0	-	-	NR	none	NR	none
chr11:111957665	SDHD	A	G	0.01667	missense_variant	MODERATE	SDHD	rs34677591,CM003169	0	tolerated_low_confidence(0.44)	benign(0.003)	NR	none	NR	none
chrX:63412690	FAM123B	C	A	0.016	missense_variant	MODERATE	AMER1	rs34677493,COSM5019140,COSM5019141	0	tolerated(0.72)	benign(0.003)	NR	none	NR	none
chr14:105242925	AKT1	T	C	0.005556	intron_variant	MODIFIER	AKT1	rs34664585	0	-	-	NR	none	NR	none
chr2:61148988	REL	G	C	0.005556	missense_variant	MODERATE	REL	rs34661029	0	tolerated(0.05)	benign(0.03)	NR	none	NR	none
chr2:234675829	UGT1A1	T	C	0.005556	intron_variant	MODIFIER	UGT1A4	rs34650714	0	-	-	NR	none	NR	none
chr1:150550924	MCL1	C	T	0.03333	synonymous_variant	LOW	MCL1	rs34645101	0	-	-	NR	none	NR	none
chr14:102548703	HSP90AA1	G	T	0.04444	synonymous_variant	LOW	HSP90AA1	rs34644998	0	-	-	NR	none	NR	none
chr8:145742799	RECQL4	C	T	0.005556	upstream_gene_variant	MODIFIER	LRRC14	rs34642881,CM033804	0	-	-	NR	none	NR	none
chr5:223646	SDHA	T	A	0.005556	missense_variant	MODERATE	SDHA	rs34635677	0	tolerated_low_confidence(0.42)	benign(0)	NR	none	NR	none
chr3:10107520	FANCD2	T	G	0.02778	intron_variant	MODIFIER	FANCD2	rs34608006	0	-	-	NR	none	NR	none
chr15:88483866	NTRK3	G	A	0.005556	synonymous_variant	LOW	NTRK3	rs34595460	0	-	-	NR	none	NR	none
chr5:149513239	PDGFRB	T	C	0.005556	missense_variant	MODERATE	PDGFRB	rs34586048	0	tolerated(0.39)	possibly_damaging(0.535)	NR	none	NR	none
chr1:186286782	TPR	G	A	0.01111	intron_variant	MODIFIER	TPR	rs34585917	0	-	-	NR	none	NR	none
chr21:46330183	ITGB2	C	T	0.03889	intron_variant	MODIFIER	ITGB2	rs34580582	0	-	-	NR	none	NR	none
chr9:8460591	PTPRD	G	A	0.005556	intron_variant	MODIFIER	PTPRD	rs34577174	0	-	-	NR	none	NR	none
chr6:93964319	EPHA7	T	C	0.3722	intron_variant	MODIFIER	EPHA7	rs345736	0	-	-	NR	none	NR	none
chr6:93967851	EPHA7	T	C	0.3389	synonymous_variant	LOW	EPHA7	rs345730	0	-	-	NR	none	NR	none
chr6:93973569	EPHA7	G	A	0.01667	intron_variant	MODIFIER	EPHA7	rs345725	0	-	-	NR	none	NR	none
chr6:93982124	EPHA7	G	A	0.3278	synonymous_variant	LOW	EPHA7	rs345713	0	-	-	NR	none	NR	none
chr1:120468128	NOTCH2	A	G	0.01111	synonymous_variant	LOW	NOTCH2	rs34561092	0	-	-	NR	none	NR	none
chr12:49416047	MLL2	-	C	0.03333	intron_variant	MODIFIER	KMT2D	rs34546217	0	-	-	NR	none	NR	none
chr11:102248377	BIRC2	T	C	0.01667	missense_variant	MODERATE	BIRC2	rs34510872	0	tolerated(0.05)	benign(0.305)	NR	none	NR	none
chr5:112176556	APC	A	G	0.01111	synonymous_variant	LOW	APC	rs34506289	0	-	-	NR	none	NR	none
chr2:100623130	AFF3	A	G	0.01667	synonymous_variant	LOW	AFF3	rs34506074	0	-	-	NR	none	NR	none
chrX:63413032	FAM123B	A	G	0.024	synonymous_variant	LOW	AMER1	rs34504794,COSM34134	0	-	-	NR	none	NR	none
chr18:47793973	MBD1	A	G	0.01667	upstream_gene_variant	MODIFIER	CCDC11	rs34500680	0	-	-	NR	none	NR	none
chr2:141242918	LRP1B	C	T	0.01111	missense_variant	MODERATE	LRP1B	rs34488772,COSM5019197	0	tolerated(0.64)	benign(0)	NR	none	NR	Confirmed somatic variant				1
chr7:98527688	TRRAP	A	G	0.01667	synonymous_variant	LOW	TRRAP	rs34480817	0	-	-	NR	none	NR	none
chr6:51524403	PKHD1	A	G	0.005556	synonymous_variant	LOW	PKHD1	rs34460237	0	-	-	NR	none	NR	none
chr8:145741142	RECQL4	A	T	0.04444	upstream_gene_variant	MODIFIER	LRRC14	rs34437789	0	-	-	NR	none	NR	none
chr16:89809171	FANCA	T	C	0.01111	intron_variant	MODIFIER	FANCA	rs34420680	0	-	-	NR	none	NR	none
chr4:106196829	TET2	G	T	0.02778	missense_variant	MODERATE	TET2	rs34402524,COSM5020013,COSM87176	0	deleterious(0)	possibly_damaging(0.478)	NR	PATHOGENIC	NR	none		1
chr17:78313562	RNF213	T	C	0.01111	synonymous_variant	LOW	RNF213	rs34399489	0	-	-	NR	none	NR	none
chr9:139397557	NOTCH1	G	C	0.07222	intron_variant	MODIFIER	NOTCH1	rs34383263	0	-	-	NR	none	NR	none
chr6:91271275	MAP3K7	A	G	0.005556	intron_variant	MODIFIER	MAP3K7	rs34376813	0	-	-	NR	none	NR	none
chr13:28608459	FLT3	C	T	0.02778	synonymous_variant	LOW	FLT3	rs34374211,COSM19740	0	-	-	NR	none	NR	none
chr3:52584432	PBRM1	CTC	-	0.06667	splice_region_variant,intron_variant	LOW	PBRM1	rs34372721	0	-	-	NR	none	NR	none
chr20:54945211	AURKA	G	T	0.005556	3_prime_UTR_variant	MODIFIER	AURKA	rs34361943	0	-	-	NR	none	NR	none
chr7:91729127	AKAP9	G	A	0.005556	missense_variant	MODERATE	AKAP9	rs34327395	0	tolerated(0.06)	benign(0)	NR	none	NR	none
chr3:10107215	FANCD2	G	A	0.01111	intron_variant	MODIFIER	FANCD2	rs34323624	0	-	-	NR	none	NR	none
chr19:45797593	MARK4	C	T	0.03889	intron_variant	MODIFIER	MARK4	rs34313092	0	-	-	NR	none	NR	none
chr16:15842005	MYH11	A	G	0.005556	synonymous_variant	LOW	MYH11	rs34287137	0	-	-	NR	none	NR	none
chr20:39657625	TOP1	A	C	0.005556	5_prime_UTR_variant	MODIFIER	TOP1	rs34282819	0	-	-	NR	none	NR	none
chr16:15829419	MYH11	T	C	0.005556	missense_variant	MODERATE	MYH11	rs34263860	0	tolerated(0.1)	benign(0.003)	NR	none	NR	none
chr17:41606033	ETV4	A	G	0.02222	missense_variant	MODERATE	ETV4	rs34260468	0	deleterious(0)	probably_damaging(0.997)	NR	none	NR	none
chr4:88052219	AFF1	C	T	0.4278	intron_variant	MODIFIER	AFF1	rs342467	0	-	-	NR	none	NR	none
chr4:88053085	AFF1	T	C	0.02778	intron_variant	MODIFIER	AFF1	rs342466	0	-	-	NR	none	NR	none
chr17:17118442	FLCN	C	T	0.02222	intron_variant	MODIFIER	FLCN	rs34235236	0	-	-	NR	none	NR	none
chr5:180057293	FLT4	C	T	0.005556	missense_variant	MODERATE	FLT4	rs34221241	0	tolerated(0.21)	benign(0.003)	NR	none	NR	none
chr2:209108317	IDH1	T	C	0.02778	missense_variant	MODERATE	IDH1	rs34218846,COSM97131	0	tolerated_low_confidence(0.11)	probably_damaging(0.98)	NR	PATHOGENIC	NR	none		1
chr3:195597014	TNK2	T	C	0.005556	missense_variant	MODERATE	TNK2	rs34189351	0	tolerated(0.09)	benign(0.017)	NR	none	NR	none
chr3:52668776	PBRM1	G	A	0.005556	synonymous_variant	LOW	PBRM1	rs34173244,COSM6494904	0	-	-	NR	none	NR	none
chr3:128200072	GATA2	T	C	0.05556	synonymous_variant	LOW	GATA2	rs34172218,COSM5019736	0	-	-	NR	none	NR	Confirmed somatic variant				1
chr1:144906508	PDE4DIP	T	C	0.08333	missense_variant	MODERATE	PDE4DIP	rs34169189	0	tolerated(0.37)	benign(0.001)	NR	none	NR	none
chr5:176721151	NSD1	C	T	0.01667	missense_variant	MODERATE	NSD1	rs34165241	0	tolerated_low_confidence(1)	benign(0)	NR	none	NR	none
chr17:5418068	NLRP1	C	G	0.01667	downstream_gene_variant	MODIFIER	NLRP1	rs34156685	0	-	-	NR	none	NR	none
chr14:92471014	TRIP11	G	A	0.01111	synonymous_variant	LOW	TRIP11	rs34151071	0	-	-	NR	none	NR	none
chr12:43770197	ADAMTS20	-	AT	0.005556	intron_variant	MODIFIER	ADAMTS20	rs34115972	0	-	-	NR	none	NR	none
chr6:44217749	HSP90AB1	T	C	0.005556	intron_variant	MODIFIER	HSP90AB1	rs34093450	0	-	-	NR	none	NR	none
chr6:44217374	HSP90AB1	G	T	0.1056	intron_variant	MODIFIER	HSP90AB1	rs34083426	0	-	-	NR	none	NR	none
chr17:37686920	CDK12	T	C	0.005556	missense_variant	MODERATE	CDK12	rs34070318	0	tolerated_low_confidence(0.19)	possibly_damaging(0.886)	NR	none	NR	none
chr16:89812930	FANCA	A	G	0.005556	intron_variant	MODIFIER	FANCA	rs34019730	0	-	-	NR	none	NR	none
chr16:2114407	TSC2	T	C	0.1111	synonymous_variant	LOW	TSC2	rs34012042,COSM5019529	0	-	-	NR	none	NR	none
chr15:99473606	IGF1R	G	A	0.1278	intron_variant	MODIFIER	IGF1R	rs33982004	0	-	-	NR	none	NR	none
chr16:68856088	CDH1	T	C	0.07778	synonymous_variant	LOW	CDH1	rs33969373,COSM4129242	0	-	-	NR	none	NR	Confirmed somatic variant				1
chr16:68842480	CDH1	C	G	0.01111	intron_variant	MODIFIER	CDH1	rs33963999,COSM5020197	0	-	-	NR	none	NR	Confirmed somatic variant				1
chr6:52878654	ICK	T	C	0.02778	missense_variant	MODERATE	ICK	rs33936662	0	tolerated(0.28)	benign(0.003)	NR	none	NR	none
chr7:138265310	TRIM24	G	A	0.05	synonymous_variant	LOW	TRIM24	rs33935215	0	-	-	NR	none	NR	none
chr15:40914831	CASC5	G	C	0.01667	missense_variant	MODERATE	CASC5	rs33931006	0	tolerated(0.16)	benign(0.011)	NR	none	NR	none
chr7:116340262	MET	G	A	0.005556	missense_variant	MODERATE	MET	rs33917957,COSM5020653	0	tolerated(0.47)	benign(0.015)	NR	PATHOGENIC	NR	none		1
chr20:39802814	PLCG1	T	G	0.005556	synonymous_variant	LOW	PLCG1	rs33917926,COSM5020784	0	-	-	NR	none	NR	none
chr11:47259668	DDB2	C	T	0.4667	intron_variant	MODIFIER	DDB2	rs326222	0	-	-	NR	none	NR	none
chr11:47238522	DDB2	T	C	0.2556	synonymous_variant	LOW	DDB2	rs326212	0	-	-	NR	none	NR	none
chr1:45795027	MUTYH	T	C	0.01111	missense_variant	MODERATE	MUTYH	rs3219497	0	tolerated(0.59)	benign(0.003)	NR	none	NR	none
chr1:45796115	MUTYH	A	G	0.005556	intron_variant	MODIFIER	MUTYH	rs3219495	0	-	-	NR	none	NR	none
chr1:45797505	MUTYH	G	C	0.2056	missense_variant	MODERATE	MUTYH	rs3219489,CM083726	0	tolerated(0.08)	benign(0.285)	NR	none	NR	none
chr1:45798555	MUTYH	C	T	0.2778	intron_variant	MODIFIER	MUTYH	rs3219487	0	-	-	NR	none	NR	none
chr1:45800156	MUTYH	T	C	0.005556	missense_variant	MODERATE	MUTYH	rs3219484	0	tolerated_low_confidence(0.11)	benign(0.015)	NR	none	NR	none
chr11:108114727	ATM	C	G	0.01111	missense_variant	MODERATE	ATM	rs3218707,CM035638	0	deleterious(0.02)	benign(0.005)	NR	none	NR	none
chr11:108165634	ATM	G	A	0.01111	intron_variant	MODIFIER	ATM	rs3218678	0	-	-	NR	none	NR	none
chr7:152346007	XRCC2	T	C	0.01111	missense_variant	MODERATE	XRCC2	rs3218536,CM021368	0	tolerated(0.42)	benign(0.011)	NR	none	NR	none
chr19:30308385	CCNE1	C	T	0.02778	synonymous_variant	LOW	CCNE1	rs3218045	0	-	-	NR	none	NR	none
chr12:4388084	CCND2	G	C	0.2278	splice_region_variant,synonymous_variant	LOW	CCND2	rs3217805	0	-	-	NR	none	NR	none
chr2:198267771	SF3B1	AA	-	0.07778	intron_variant	MODIFIER	SF3B1	rs3217350	0	-	-	NR	none	NR	none
chr7:148504717	EZH2	-	G	0.1111	3_prime_UTR_variant	MODIFIER	EZH2	rs3217095	0	-	-	NR	none	NR	none
chr7:98534947	TRRAP	-	AT	0.04444	intron_variant	MODIFIER	TRRAP	rs3216992	0	-	-	NR	none	NR	none
chr2:25471170	DNMT3A	-	C	0.03333	intron_variant	MODIFIER	DNMT3A	rs3216707	0	-	-	NR	none	NR	none
chr2:216240127	FN1	-	AC	0.03333	intron_variant	MODIFIER	FN1	rs3214672	0	-	-	NR	none	NR	none
chr15:91337624	BLM	-	T	0.005556	intron_variant	MODIFIER	BLM	rs3214113	0	-	-	NR	none	NR	none
chr7:138268563	TRIM24	G	A	0.01111	intron_variant	MODIFIER	TRIM24	rs3213902	0	-	-	NR	none	NR	none
chr19:45922323	ERCC1	T	G	0.07222	intron_variant	MODIFIER	ERCC1	rs3212961	0	-	-	NR	none	NR	none
chr19:45924362	ERCC1	C	G	0.1667	intron_variant	MODIFIER	ERCC1	rs3212948	0	-	-	NR	none	NR	none
chr11:69465860	CCND1	G	A	0.01667	intron_variant	MODIFIER	CCND1	rs3212892	0	-	-	NR	none	NR	none
chr19:17937516	JAK3	T	C	0.005556	3_prime_UTR_variant	MODIFIER	JAK3	rs3212799	0	-	-	NR	none	NR	none
chr19:17937758	JAK3	T	C	0.09444	intron_variant	MODIFIER	JAK3	rs3212798	0	-	-	NR	none	NR	none
chr19:17952185	JAK3	T	G	0.02778	intron_variant	MODIFIER	JAK3	rs3212733	0	-	-	NR	none	NR	none
chr12:58145099	CDK4	T	C	0.005556	missense_variant	MODERATE	CDK4	rs3211612	0	tolerated(0.17)	possibly_damaging(0.687)	NR	none	NR	none
chr5:35876274	IL7R	G	A	0.3	missense_variant	MODERATE	IL7R	rs3194051,CM058270,COSM5904807	0	tolerated(0.42)	benign(0.012)	NR	none	NR	Confirmed somatic variant				1
chr17:78363847	RNF213	A	G	0.1111	synonymous_variant	LOW	RNF213	rs3185057	0	-	-	NR	none	NR	none
chr5:176523562	FGFR4	A	C	0.005556	intron_variant	MODIFIER	FGFR4	rs31777	0	-	-	NR	none	NR	none
chr3:10142949	FANCD2	T	C	0.2333	downstream_gene_variant	MODIFIER	FANCD2	rs3172417	0	-	-	NR	none	NR	none
chr15:41796498	LTK	A	T	0.1556	intron_variant	MODIFIER	LTK	rs316618	0	-	-	NR	none	NR	none
chr7:100411278	EPHB4	T	C	0.3944	synonymous_variant	LOW	EPHB4	rs314359	0	-	-	NR	none	NR	none
chr7:100410657	EPHB4	G	A	0.1778	intron_variant	MODIFIER	EPHB4	rs314358	0	-	-	NR	none	NR	none
chr7:100401270	EPHB4	G	T	0.1	intron_variant	MODIFIER	EPHB4	rs314348	0	-	-	NR	none	NR	none
chr1:6528589	PLEKHG5	T	C	0.005556	synonymous_variant	LOW	PLEKHG5	rs3138150	0	-	-	NR	none	NR	none
chr2:48032937	MSH6	C	T	0.1333	intron_variant	MODIFIER	MSH6	rs3136359	0	-	-	NR	none	NR	none
chr16:14025942	ERCC4	G	A	0.01667	intron_variant	MODIFIER	ERCC4	rs3136121	0	-	-	NR	none	NR	none
chr16:14015932	ERCC4	T	C	0.005556	synonymous_variant	LOW	ERCC4	rs3136056	0	-	-	NR	none	NR	none
chr4:1805593	FGFR3	C	G	0.01667	intron_variant	MODIFIER	FGFR3	rs3135886	0	-	-	NR	none	NR	none
chr4:1805568	FGFR3	T	C	0.01667	intron_variant	MODIFIER	FGFR3	rs3135885,COSM5019820	0	-	-	NR	none	NR	Confirmed somatic variant				1
chr4:1801542	FGFR3	G	A	0.02778	splice_region_variant,intron_variant	LOW	FGFR3	rs3135868,COSM5019818	0	-	-	NR	none	NR	none
chr4:1801511	FGFR3	T	C	0.005556	synonymous_variant	LOW	FGFR3	rs3135867	0	-	-	NR	none	NR	none
chr10:123247644	FGFR2	C	A	0.03889	intron_variant	MODIFIER	FGFR2	rs3135802	0	-	-	NR	none	NR	none
chr10:123263478	FGFR2	G	C	0.01111	intron_variant	MODIFIER	FGFR2	rs3135774	0	-	-	NR	none	NR	none
chr6:32168771	NOTCH4	T	G	0.03333	synonymous_variant	LOW	NOTCH4	rs3134942,COSM4006410	0	-	-	NR	none	NR	Confirmed somatic variant				1
chr6:32184705	NOTCH4	A	G	0.06667	intron_variant	MODIFIER	NOTCH4	rs3134798	0	-	-	NR	none	NR	none
chr1:40363054	MYCL1	C	G	0.1167	missense_variant	MODERATE	MYCL	rs3134614	0	tolerated_low_confidence(1)	benign(0.001)	NR	none	NR	none
chr6:32183175	NOTCH4	A	G	0.3	intron_variant	MODIFIER	NOTCH4	rs3131290	0	-	-	NR	none	NR	none
chr17:75471762	SEP9	A	G	0.01111	intron_variant	MODIFIER	SEPT9	rs312821	0	-	-	NR	none	NR	none
chr17:75489216	SEP9	T	C	0.25	intron_variant	MODIFIER	SEPT9	rs312797	0	-	-	NR	none	NR	none
chr1:47842431	CMPK1	A	G	0.4944	3_prime_UTR_variant	MODIFIER	CMPK1	rs3125648	0	-	-	NR	none	NR	none
chr9:139410424	NOTCH1	G	A	0.1111	intron_variant	MODIFIER	NOTCH1	rs3125006,COSM6495253	0	-	-	NR	none	NR	none
chr9:139405261	NOTCH1	T	C	0.02222	splice_region_variant,intron_variant	LOW	NOTCH1	rs3125001,COSM6495245	0	-	-	NR	none	NR	none
chr9:139410177	NOTCH1	C	T	0.1	intron_variant	MODIFIER	NOTCH1	rs3124603,COSM6495251	0	-	-	NR	none	NR	none
chr9:139402663	NOTCH1	C	T	0.03889	intron_variant	MODIFIER	NOTCH1	rs3124597	0	-	-	NR	none	NR	none
chr9:139396408	NOTCH1	G	A	0.3111	intron_variant	MODIFIER	NOTCH1	rs3124594	0	-	-	NR	none	NR	none
chr5:38490271	LIFR	G	A	0.08333	intron_variant	MODIFIER	LIFR	rs3110971	0	-	-	NR	none	NR	none
chr7:98534920	TRRAP	A	T	0.06667	intron_variant	MODIFIER	TRRAP	rs310736	0	-	-	NR	none	NR	none
chr1:65325970	JAK1	T	C	0.08889	intron_variant	MODIFIER	JAK1	rs310224	0	-	-	NR	none	NR	none
chr16:27455886	IL21R	G	A	0.01667	synonymous_variant	LOW	IL21R	rs3093369	0	-	-	NR	none	NR	none
chr11:108170373	ATM	G	T	0.01111	intron_variant	MODIFIER	ATM	rs3092906	0	-	-	NR	none	NR	none
chr13:49051481	RB1	A	T	0.04444	intron_variant	MODIFIER	RB1	rs3092904,COSM147687	0	-	-	NR	none	NR	Confirmed somatic variant				1
chr13:48919381	RB1	G	A	0.005556	intron_variant	MODIFIER	RB1	rs3092901	0	-	-	NR	none	NR	none
chr11:108175394	ATM	C	T	0.005556	splice_region_variant,intron_variant	LOW	ATM	rs3092829,COSM5019227	0	-	-	NR	none	NR	none
chr8:30948164	WRN	A	C	0.02778	intron_variant	MODIFIER	WRN	rs3087418	0	-	-	NR	none	NR	none
chr8:31005018	WRN	C	-	0.3333	intron_variant	MODIFIER	WRN	rs3087415	0	-	-	NR	none	NR	none
chr8:30946403	WRN	A	C	0.03333	splice_region_variant,intron_variant	LOW	WRN	rs3087409,COSM4447487	0	-	-	NR	none	NR	none
chr5:180051003	FLT4	C	T	0.02222	missense_variant	MODERATE	FLT4	rs307826	0	tolerated(0.53)	benign(0.007)	NR	none	NR	none
chrX:48888074	TFE3	C	T	0.32	synonymous_variant	LOW	TFE3	rs3027472,COSM5619206	0	-	-	NR	none	NR	none
chr17:8053085	PER1	G	T	0.2333	synonymous_variant	LOW	PER1	rs3027178	0	-	-	NR	none	NR	none
chr16:3860640	CREBBP	G	A	0.02222	synonymous_variant	LOW	CREBBP	rs3025702	0	-	-	NR	none	NR	none
chr16:3795363	CREBBP	A	G	0.03333	splice_region_variant,intron_variant	LOW	CREBBP	rs3025684,COSM148009	0	-	-	NR	none	NR	none
chr8:30999122	WRN	T	C	0.2667	splice_region_variant,intron_variant	LOW	WRN	rs3024239	0	-	-	NR	none	NR	none
chr1:6529823	PLEKHG5	C	G	0.05556	intron_variant	MODIFIER	PLEKHG5	rs3007420	0	-	-	NR	none	NR	none
chr1:6530435	PLEKHG5	G	A	0.1111	intron_variant	MODIFIER	PLEKHG5	rs2986753	0	-	-	NR	none	NR	none
chr8:41790866	KAT6A	C	G	0.005556	synonymous_variant	LOW	KAT6A	rs2980901	0	-	-	NR	none	NR	none
chr11:64572018	MEN1	C	T	0.4333	missense_variant	MODERATE	MEN1	rs2959656,CM085535,COSM255213	0	tolerated(0.76)	benign(0)	NR	none	NR	Confirmed somatic variant				1
chr3:14197987	XPC	A	T	0.2	synonymous_variant	LOW	XPC	rs2958057	0	-	-	NR	none	NR	none
chr18:25573622	CDH2	C	G	0.1444	intron_variant	MODIFIER	CDH2	rs2957286	0	-	-	NR	none	NR	none
chr21:11058322	BAGE2	T	C	0.005556	splice_region_variant,non_coding_transcript_exon_variant	LOW	BAGE2	rs2951027	0	-	-	NR	none	NR	none
chr17:37830900	PGAP3	G	A	0.4944	synonymous_variant	LOW	PGAP3	rs2941504	0	-	-	NR	none	NR	none
chr8:103316437	UBR5	A	G	0.06667	intron_variant	MODIFIER	UBR5	rs2925786	0	-	-	NR	none	NR	none
chr1:97547831	DPYD	A	G	0.2444	intron_variant	MODIFIER	DPYD	rs290854	0	-	-	NR	none	NR	none
chr17:29546175	NF1	T	C	0.3722	intron_variant	MODIFIER	NF1	rs2905880	0	-	-	NR	none	NR	none
chr9:93639846	SYK	G	C	0.06111	splice_region_variant,intron_variant	LOW	SYK	rs290223	0	-	-	NR	none	NR	none
chr19:11145691	SMARCA4	T	C	0.02222	synonymous_variant	LOW	SMARCA4	rs28997582,COSM5019894	0	-	-	NR	none	NR	none
chr15:40462846	BUB1B	C	T	0.01111	synonymous_variant	LOW	BUB1B	rs28989189	0	-	-	NR	none	NR	none
chr5:176639105	NSD1	C	T	0.1889	synonymous_variant	LOW	NSD1	rs28932181	0	-	-	NR	none	NR	none
chr5:176638506	NSD1	C	G	0.005556	missense_variant	MODERATE	NSD1	rs28932179	0	tolerated_low_confidence(0.11)	benign(0.147)	NR	none	NR	none
chr5:176637576	NSD1	C	T	0.03333	missense_variant	MODERATE	NSD1	rs28932178	0	tolerated_low_confidence(0.27)	possibly_damaging(0.852)	NR	none	NR	none
chr5:176637471	NSD1	A	G	0.01667	missense_variant	MODERATE	NSD1	rs28932177	0	tolerated_low_confidence(0.32)	benign(0.001)	NR	none	NR	none
chr5:176637192	NSD1	C	T	0.02778	synonymous_variant	LOW	NSD1	rs28932176	0	-	-	NR	none	NR	none
chr7:91715662	AKAP9	T	C	0.3667	synonymous_variant	LOW	AKAP9	rs28927678	0	-	-	NR	none	NR	none
chr5:138221989	CTNNA1	C	G	0.07222	splice_region_variant,intron_variant	LOW	CTNNA1	rs288028,COSM4407415	0	-	-	NR	none	NR	none
chr3:52584715	PBRM1	G	A	0.06667	intron_variant	MODIFIER	PBRM1	rs2878628	0	-	-	NR	none	NR	none
chr7:106509933	PIK3CG	G	A	0.01111	missense_variant	MODERATE	PIK3CG	rs28763989	0	deleterious(0.02)	benign(0.071)	NR	none	NR	none
chr18:56400826	MALT1	C	T	0.1222	intron_variant	MODIFIER	MALT1	rs28740963	0	-	-	NR	none	NR	none
chr19:18273013	PIK3R2	A	G	0.03889	splice_region_variant,synonymous_variant	LOW	PIK3R2	rs28730848	0	-	-	NR	none	NR	none
chr1:9782261	PIK3CD	C	T	0.005556	intron_variant	MODIFIER	PIK3CD	rs28730676	0	-	-	NR	none	NR	none
chr1:9777666	PIK3CD	T	C	0.005556	synonymous_variant	LOW	PIK3CD	rs28730670,CM1310846,COSM2261171,COSM4243169	0	-	-	NR	PATHOGENIC	NR	Confirmed somatic variant		1		1
[truncated: 2,258 more rows]
