# Supplementary material for: Identification of Novel Mutations in Colorectal Cancer Patients using Ampliseq Comprehensive Cancer Panel
Source: Preprints.org preprint supplement (doi:10.20944/preprints202104.0401.v1), 2021-04-15
Supplement: Supplementary file 4 [file supplementary › supplementary tables/Supplementary Table S5.csv]

Supplementary Table S5 : List of druggable targets among 75 genes
© 2000-2020 QIAGEN. All rights reserved.
Symbol	Synonym(s)	Entrez Gene Name	Location	Family	Drugs	Entrez Gene ID for Human	Entrez Gene ID for Mouse	Entrez Gene ID for Rat
APC	AI047805, APC1, Apc7, APC (PROC), APC regulator of WNT signaling pathway, APC, WNT signaling pathway regulator, AU020952, AW124434, BTPS2, CC1, DP2, DP2.5, DP3, Familial adenomatous polyposis, GS, mAPC, Min, PPP1R46, RATAPC	APC regulator of WNT signaling pathway	Nucleus	enzyme		324	11789	24205
ARID1A	1110030E03Rik, AT-rich interaction domain 1A, AT rich interactive domain 1A (SWI-like), B120, BAF250, BAF250A, BM029, C1orf4, CSS2, ELD, hELD, hOSA1, HSP16.2, MRD14, OSA1, P270, SMARCF1	AT-rich interaction domain 1A	Nucleus	transcription regulator		8289	93760	297867
ARID2	1700124K17RIK, 4432409D24RIK, AT-rich interaction domain 2, AT rich interactive domain 2 (ARID, RFX-like), BAF200, CSS6, DKFZ p686G052, p200, zipzap/p200	AT-rich interaction domain 2	Nucleus	transcription regulator		196528	77044	366980
ATM	AI256621, AT1, ATA, ataxia telangiectasia mutated, ATC, ATD, ATDC, ATE, ATM serine/threonine kinase, C030026E19RIK, TEL1, TELO1	ATM serine/threonine kinase	Nucleus	kinase	AZD1390, AZD0156, M3541	472	11920	300711
ATR	ataxia telangiectasia and Rad3 related, Ataxia-telangiectasia-like, ATR serine/threonine kinase, FCTCS, FRP1, LOC100365674, LOC367198, LOC684113, MEC1, SCKL, SCKL1	ATR serine/threonine kinase	Nucleus	kinase	VX-803, berzosertib, BAY1895344, ceralasertib	545	245000	685055
BCL9	2610202E01RIK, 8030475K17Rik, A330041G23Rik, B cell CLL/lymphoma 9, BCL9 transcription coactivator, BCL9, transcription coactivator, Gm130, LGS	BCL9 transcription coactivator	Nucleus	other		607	77578	310704
BMPR1A	10q23del, 1110037I22Rik, ACVRLK3, ALK-3, AU045487, Bmpr, BMPR-IA, bone morphogenetic protein receptor type 1A, bone morphogenetic protein receptor, type 1A, CD292, JIP, SKR5	bone morphogenetic protein receptor type 1A	Plasma Membrane	kinase		657	12166	81507
BRAF	9930012E13RIK, AA120551, AA387315, AA473386, AI447469, B-RAF1, Braf-2, B-Raf proto-oncogene, serine/threonine kinase, Braf transforming gene, C230098H17, C87398, D6Ertd631e, NS7, RAFB, RAFB1	B-Raf proto-oncogene, serine/threonine kinase	Cytoplasm	kinase	BGB-3245, cetuximab/irinotecan/vemurafenib, imatinib/sorafenib, irinotecan/panitumumab/vemurafenib, sorafenib, pembrolizumab/vemurafenib, dabrafenib/trametinib, ARQ 736, vemurafenib, sorafenib/sulindac/sunitinib, ipilimumab/vemurafenib, dexamethasone/lenalidomide/sorafenib, bevacizumab/sorafenib, binimetinib/encorafenib/panitumumab, regorafenib, 5-azacytidine/sorafenib, BRAF inhibitor, dabrafenib…	673	109880	114486
CARD11	0610008L17RIK, 2410011D02Rik, BENTA, BIMP3, CARDS11, CARMA1, caspase recruitment domain family member 11, caspase recruitment domain family, member 11, IMD11, IMD11A, LOC100363332, LOC102723892, PPBL	caspase recruitment domain family member 11	Cytoplasm	kinase		84433	108723	100363332
CDC73	8430414L16RIK, BC027756, C130030P16Rik, C1orf28, C81219, cell division cycle 73, cell division cycle 73, Paf1/RNA polymerase II complex component, FIHP, HPRT2, HPTJT, HRPT1, HRPT2, HYX	cell division cycle 73	Nucleus	other		79577	214498	304832
CDK12	1810022J16RIK, AI646528, CRK7, CRKR, CRKRS, cyclin-dependent kinase 12, D11Ertd752e, LOC100502717, Pksc	cyclin dependent kinase 12	Nucleus	kinase		51755	69131	192350
COL1A1	Alpha1-1 Collagen, alpha 1(I) COLLAGEN, alpha 1 (I) PROCOLLAGEN, Alpha1 type i collagen, Alpha1 Type I Procollagen, CAFYD, COL1, Col1a, Cola-1, COL I, COLIA1, COLLAGEN 1 alpha1, Collagen alpha1, COLLAGEN alpha1 (I), Collagen alpha 1(I) chain precursor, Collagen I, Collagen i-alpha, COLLAGEN I alpha1, Collagen i-α, Collagen Type1 Alpha1, Collagen type I, COLLAGEN type I alpha 1, collagen, type I, …	collagen type I alpha 1 chain	Extracellular Space	other	collagenase clostridium histolyticum	1277	12842	29393
CREBBP	AW558298, CBP, CBP/p300, CREB binding protein, KAT3A, MKHK1, p300/CBP, RSTS1, RSTS, RTS	CREB binding protein	Nucleus	transcription regulator	PRI-724, CCS1477	1387	12914	54244
CTNNB1	armadillo, Beta-cat, beta CATENIN, beta-Ctnn, Bfc, CATENIN beta, catenin beta 1, catenin (cadherin associated protein), beta 1, catenin (cadherin associated protein), β 1, CATENIN β, catenin β 1, CATNB, CTNB1, CTNNB, CTNN beta, CTNN β, EVR7, Mesc, MRD19, NEDSDV, β-cat, β-catenin, β-Ctnn	catenin beta 1	Nucleus	transcription regulator	PRI-724	1499	12387	84353
DDR2	AI838577, AW495251, discoidin domain receptor family, member 2, discoidin domain receptor tyrosine kinase 2, LOC686988, LOC98434, MIG20a, NTRKR3, TKT, TYRO10, WRCN	discoidin domain receptor tyrosine kinase 2	Plasma Membrane	kinase	regorafenib, imatinib/sirolimus, imatinib/sorafenib, dacomitinib, imatinib/nilotinib, blinatumomab/imatinib, bosutinib/imatinib, imatinib/inotuzumab ozogamicin, decitabine/imatinib, sitravatinib, imatinib, imatinib/sunitinib	4921	18214	685781
DEK	1810019E15Rik, D13H6S231E, D6S231E, DEK proto-oncogene, DEK proto-oncogene (DNA binding)	DEK proto-oncogene	Nucleus	transcription regulator		7913	110052	306817
DICER1	1110006F08Rik, D12Ertd7e, DCR1, Dicer, Dicer1e, dicer 1 ribonuclease III, dicer 1, ribonuclease III, dicer 1, ribonuclease type III, GLOW, HELICASE MOI, HERNA, K12H4.8, K12H4.8-LIKE, KIAA0928, mKIAA0928, MNG1, RMSE2	dicer 1, ribonuclease III	Cytoplasm	enzyme		23405	192119	299284
EGFR	9030024J15RIK, AI552599, C-ERBB, EGFR1, EGF receptor, EGFR vIII, EGF-TK, epidermal growth factor receptor, ERBB, ERBB1, Errb1, Errp, HER1, HER-1 (EGFR), MENA, NISBD2, PIG61, wa-2, Wa5	epidermal growth factor receptor	Plasma Membrane	kinase	hemay020, cetuximab/erlotinib, CK-101, 18F-PEG6-IPQA, bis-tyrphostin, CLN-081, erlotinib/osimertinib, capecitabine/cetuximab/irinotecan, neratinib, MCLA-158, erlotinib, erlotinib/gemcitabine, dasatinib/erlotinib, BPI-15086, SCT200, BIBX 1382BS, docetaxel/erlotinib, ABBV-221, docetaxel/lapatinib, afatinib, afatinib/paclitaxel, cetuximab/vemurafenib, sym013, lazertinib, HLX07, BMS-690514, matuzumab…	1956	13649	24329
EP300	A430090G16, A730011L11, E1A binding protein p300, KAT3B, MKHK2, p300, p300 HAT, RSTS2	E1A binding protein p300	Nucleus	transcription regulator	CCS1477	2033	328572	170915
EP400	1700020J09Rik, AU023439, CAGH32, E1A binding protein p400, mDomino, mKIAA1498, NHCP p400, P400, TNRC12	E1A binding protein p400	Nucleus	other		57634	75560	304569
EPHB1	9330129L11, AW488255, C130099E04Rik, Cek6, Efnb1r, ELK, ELKH, Ephb2, Ephbi, EPH receptor B1, Eph receptor b2, EPHT2, Erk, Hek6, NET	EPH receptor B1	Plasma Membrane	kinase		2047	270190	24338
ERBB2	1 NDF1, CD340, C-erb-b2, c-neu, EGFR2, epidermal growth factor receptor 2, ERBB2 receptor, erb-b2 receptor tyrosine kinase 2, HER-2, HER-2 (ERBB2), HER2/Neu, l11Jus8, mKIAA3023, MLN 19, NEU, NGL, p185HER2, TKR1, V-ERBB2 NEURO/GLIOBLASTOMA-DERIVED ONCOGENE	erb-b2 receptor tyrosine kinase 2	Plasma Membrane	kinase	paclitaxel/pertuzumab/trastuzumab, tucatinib, ADCT-502, erlotinib/osimertinib, docetaxel/pertuzumab/trastuzumab, neratinib, 89Zr-trastuzumab, BDC-1001, erlotinib, A166, anti-HER2 antibody, HER2 inhibitor, docetaxel/lapatinib, afatinib, afatinib/paclitaxel, cyclophosphamide/docetaxel/epirubicin/5-fluorouracil/trastuzumab, sym013, trastuzumab, MM-111, BMS-690514, cyclophosphamide/docetaxel/trastuzu…	2064	13866	24337
ERBB4	ALS19, C-erb-b4, erb-b2 receptor tyrosine kinase 4, HER4, p180erbB4	erb-b2 receptor tyrosine kinase 4	Plasma Membrane	kinase	afatinib, afatinib/paclitaxel, pirotinib, afatinib/cetuximab, erlotinib/osimertinib, neratinib/paclitaxel, JNJ-26483327, poziotinib, dacomitinib, neratinib, afatinib/osimertinib, BMS-599626, allitinib, osimertinib, gefitinib/osimertinib, pelitinib	2066	13869	59323
ERCC2	AA407812, AU020867, AW240756, COFS2, CXPD, EM9, ERCC excision repair 2, TFIIH core complex helicase subunit, excision repair cross-complementing rodent repair deficiency, complementation group 2, LOC100361160, LOC100364929, Mhdarco15, RCO015, TFIIH, TFIIH p80, TTD, TTD1, XPD	ERCC excision repair 2, TFIIH core complex helicase subunit	Nucleus	enzyme		2068	13871	308415
EZH2	EHZ2, enhancer of zeste 2 polycomb repressive complex 2 subunit, ENX-1, Enx1h, EZH2b, KMT6, KMT6A, mKIAA4065, WVS, WVS2	enhancer of zeste 2 polycomb repressive complex 2 subunit	Nucleus	transcription regulator	SHR2554, GSK2816126, tazemetostat, PF-06821497, CPI-0209, CPI-1205, valemetostat	2146	14056	312299
FBXW7	1110001A17Rik, AGO, CDC4, F-box and WD-40 domain protein 7, F-box and WD repeat domain containing 7, FBW6, FBW7, Fbwd6, FBX30, FBXO30, FBXW6, hAgo, hCdc4, SEL-10	F-box and WD repeat domain containing 7	Nucleus	enzyme		55294	50754	100360914
FGFR2	AU043015, AW556123, BBDS, CD332, CEK3, CFD1, ECT1, Fgfr2 3c, Fgfr2b, Fgfr2b isoform, Fgfr2c isoform, Fgfr-7, fibroblast growth factor receptor 2, JWS, KGFRTr, K-SAM, svs, TK14, TK25	fibroblast growth factor receptor 2	Plasma Membrane	kinase	BAY1179470, derazantinib, bortezomib/dexamethasone/thalidomide, thalidomide, rituximab/thalidomide, ASP5878, PRN1371, lenvatinib, 3D185, debio 1347, erdafitinib, prednisone/thalidomide, aprutumab ixadotin, regorafenib, lenvatinib/pembrolizumab, dexamethasone/thalidomide, pazopanib, docetaxel/nintedanib, FPA144, everolimus/lenvatinib, alofanib, pemigatinib, SKI-G-801, bortezomib/thalidomide, ninte…	2263	14183	25022
FGFR3	ACH, CD333, CEK2, Fgfr3 iiib, fibroblast growth factor receptor 3, Flg-2, FR3, HBGFR, HSFGFR3EX, JTK4, Mfr3, sam3	fibroblast growth factor receptor 3	Plasma Membrane	kinase	ASP5878, lapatinib/pazopanib, PRN1371, lenvatinib, 3D185, erdafitinib, debio 1347, lenvatinib/pembrolizumab, pazopanib, crizotinib/pazopanib, docetaxel/nintedanib, masitinib, everolimus/lenvatinib, SAR103168, pemigatinib, LY3076226, nintedanib, B-701, derazantinib	2261	14184	84489
FLT1	AI323757, FLT, FMS-like tyrosine kinase 1, fms related receptor tyrosine kinase 1, VEGFR-1	fms related receptor tyrosine kinase 1	Plasma Membrane	kinase	fruquintinib, sorafenib, lapatinib/pazopanib, lenvatinib, sorafenib/sulindac/sunitinib, vandetanib, imatinib/sunitinib, dexamethasone/lenalidomide/sorafenib, bevacizumab/sorafenib, sunitinib, axitinib, CEP 7055, motesanib, regorafenib, icrucumab, 5-azacytidine/sorafenib, pazopanib, famitinib, cabozantinib/erlotinib, SAR103168, SKI-G-801, everolimus/sorafenib, everolimus/vandetanib, sulfatinib, bo…	2321	14254
FN1	cFn, CIG, E330027I09, ED-B, FIBNEC, Fibronectin, FIBRONECTIN 1, Fibronectin3 M1, Fibronectin i, FINC, FN, FN1 isoform 1, FNZ, GFND, GFND2, LETS, MSF, SMDCF	fibronectin 1	Extracellular Space	enzyme	L19-IL2 monoclonal antibody-cytokine fusion protein/L19TNFalpha, ocriplasmin, L19TNFalpha, L19-IL2 monoclonal antibody-cytokine fusion protein	2335	14268	25661
GATA2	DCML, GATA binding protein 2, IMD21, MGC2306, MONOMAC, NFE1B	GATA binding protein 2	Nucleus	transcription regulator		2624	14461	25159
GNAS	5530400H20RIK, A930027G11RIK, AHO, AHO2, ALEX, C130027O20Rik, C20orf45, G-alpha-8, G alpha S, GANGLIOSIDE EXPRESSION FACTOR 2, GNAS1, GNAS complex locus, GNAS (guanine nucleotide binding protein, alpha stimulating) complex locus, GNAS (guanine nucleotide binding protein, α stimulating) complex locus, Gnpas, G protein α s, GPSA, GSA, Gs-alpha, Gs alpha subunit, Gs GTP-Binding, GSP, GS α, Gs α subu…	GNAS complex locus	Plasma Membrane	enzyme		2778	14683	24896
HNF1A	AI323641, HNF1, HNF1 homeobox A, HNF1-alpha, HNF1-α, HNF1alpha (MODY3), HNF1α (MODY3), HNF4A, IDDM20, LF-B1, MODY3, TCF-1	HNF1 homeobox A	Nucleus	transcription regulator		6927	21405	24817
IDH1	AI314845, AI788952, E030024J03Rik, HEL-216, HEL-S-26, Id-1, IDCD, IDH, IDP, IDPC, ISOCITRATE DEHYDROGENASE, isocitrate dehydrogenase 1 (NADP+), soluble, isocitrate dehydrogenase (NADP(+)) 1, PICD	isocitrate dehydrogenase (NADP(+)) 1	Cytoplasm	enzyme	olutasidenib, IDH305, ivosidenib, DS-1001, BAY1436032, IDH1 inhibitor	3417	15926	24479
IGF1R	A330103N21RIK, CD221, D930020L01, hyft, Igf1r beta isoform, IGF-1 receptor, IGF1R β, Igf1r β isoform, IGFIR, IGFIRC, IGFR, IGFR1, insulin-like growth factor 1 receptor, insulin-like growth factor I receptor, Insulin-like growth factor I receptor precursor, JTK13, LOC51049, MGC18216	insulin like growth factor 1 receptor	Plasma Membrane	transmembrane receptor	IGF-1R inhibitor, IGF-methotrexate conjugate, PL225B, cixutumumab, AVE1642, linsitinib, dalotuzumab, brigatinib, picropodophyllin, [225Ac]-FPI-1434, istiratumab, BMS-754807, ganitumab, KW-2450, ceritinib, [111In]-FPI-1547, XL228, BIIB022, [I-124]-CPD-1028, IGF1	3480	16001	25718
KDM6A	bA386N14.2, KABUK2, lysine demethylase 6A, lysine (K)-specific demethylase 6A, RGD1565481, ubiquitously transcribed tetratricopeptide repeat containing, Y-linked, UTX, Uty	lysine demethylase 6A	Nucleus	enzyme		7403	22289	100310845
KDR	6130401C07, CD309, Flk, FLK1, Kinase Insert Domain, kinase insert domain protein receptor, kinase insert domain receptor, Krd-1, Ly73, orv, VEGFR, VEGFR-2	kinase insert domain receptor	Plasma Membrane	kinase	CHIR-265, midostaurin, sorafenib/sulindac/sunitinib, apatinib, brivanib, imatinib/sunitinib, bevacizumab/sorafenib, tanibirumab, axitinib, motesanib, 5-azacytidine/sorafenib, pazopanib, tesevatinib, XL999, JI 101, PF 00337210, famitinib, telatinib, brivanib alaninate, SAR103168, henatinib, VEGFR2 inhibitor, pegdinetanib, rebastinib, orantinib, paclitaxel/pembrolizumab/ramucirumab, sulfatinib, BMS…	3791	16542	25589
KIT	Ack2, Bs, CD117, c-KIT, C-Kit1, c-Kit Gnnk+, Fdc, Gsfsco1, Gsfsco5, Gsfsow3, KIT proto-oncogene receptor tyrosine kinase, KIT proto-oncogene, receptor tyrosine kinase, MASTC, PBT, SCFR, SCO1, SCO5, SCR, SOW3, Ssm, white-spotted	KIT proto-oncogene, receptor tyrosine kinase	Plasma Membrane	transmembrane receptor	midostaurin, filgrastim/imatinib, sorafenib/sulindac/sunitinib, imatinib/sunitinib, bevacizumab/sorafenib, axitinib, cytarabine/imatinib/methotrexate, motesanib, hydrocortisone/imatinib, AMG 191, 5-azacytidine/sorafenib, tandutinib, pazopanib, quizartinib, dasatinib/nilotinib, ponatinib, famitinib, dasatinib/erlotinib, telatinib, imatinib, imatinib/nilotinib/pegintron, nilotinib/rituximab, blinat…	3815	16590	64030
KRAS	AI929937, CFC2, c-Ki-ras, c-Ki-ras2, c-Ki-ras p21, 'C-K-RAS, C-K-RAS, KI-RAS, KI-RAS4B, Kirsten rat sarcoma viral oncogene homolog, KRAS1, KRAS2, K-RAS2A, K-RAS2B, K-RAS B, KRAS proto-oncogene, GTPase, NS, NS3, OES, p21, p21B, p21ras, RALD, RAS, RASK2	KRAS proto-oncogene, GTPase	Cytoplasm	enzyme	JNJ-74699157, AZD4785, chelerythrine, MRTX849, LY3499446	3845	16653	24525
LRP1B	9630004P12Rik, LDL receptor related protein 1B, low density lipoprotein-related protein 1B, LRP-DIT	LDL receptor related protein 1B	Plasma Membrane	transmembrane receptor		53353	94217
MAP2K4	JNKK, JNKK1, MAPK/ERK KINASE-1, MAPKK4, MEK4, mitogen-activated protein kinase kinase 4, MKK4, PRKMK4, SAPKK-1, SEK1, SERK1, SKK1	mitogen-activated protein kinase kinase 4	Cytoplasm	kinase	cetuximab/encorafenib, binimetinib/encorafenib, encorafenib, binimetinib/cetuximab/encorafenib, binimetinib/encorafenib/panitumumab	6416	26398	287398
MBD1	CXXC3, methyl-CpG binding domain protein 1, PCM1, RFT	methyl-CpG binding domain protein 1	Nucleus	transcription regulator		4152	17190	291439
MITF	BCC2, bHLHe32, bw, CMM8, COMMAD, Gsfbcc2, melanocyte inducing transcription factor, melanogenesis associated transcription factor, MI, Microphthalmia-associated transcription factor, vit, Vitiligo, Wh, WS2, WS2A	melanocyte inducing transcription factor	Nucleus	transcription regulator		4286	17342	25094
MLH1	1110035C23Rik, AI317206, AI325952, AI561766, COCA2, FCC2, hMLH1, HNPCC, HNPCC2, mutL homolog 1	mutL homolog 1	Nucleus	enzyme		4292	17350	81685
MLLT10	AF10, B130021D15Rik, D630001B22RIK, mKIAA4140, MLLT10 histone lysine methyltransferase DOT1L cofactor, MLLT10, histone lysine methyltransferase DOT1L cofactor, myeloid/lymphoid or mixed-lineage leukaemia; translocated to, 10, myeloid/lymphoid or mixed-lineage leukemia; translocated to, 10	MLLT10 histone lysine methyltransferase DOT1L cofactor	Nucleus	transcription regulator		8028	17354	361285
MSH2	AI788990, COCA1, FCC1, hMSH2, HNPCC, HNPCC1, LCFS2, mutS homolog 2	mutS homolog 2	Nucleus	enzyme		4436	17685	81709
MTOR	2610315D21Rik, AI327068, Flat, FRAP, FRAP1, FRAP2, FRB, mechanistic target of rapamycin kinase, RAFT1, RAPT1, RRAFT1, SKS	mechanistic target of rapamycin kinase	Nucleus	kinase	everolimus/fulvestrant, apitolisib, PF-4691502, AZD8055, dactolisib, PKI-179, CC-223, samotolisib, everolimus/letrozole, ABI-009, everolimus/gefitinib, everolimus/prednisone, methotrexate/sirolimus/tacrolimus, prednisone/tacrolimus, methylprednisolone/tacrolimus, cyclosporine A/sirolimus/tacrolimus, PWT33597, mTOR inhibitor, everolimus/sorafenib, bimiralisib, everolimus, pimecrolimus, panulisib, …	2475	56717	56718
MUTYH	5730495A01Rik, mutY DNA glycosylase, Mutyha, Mutyhalpha, Mutyhb, Mutyhbeta, Mutyhc, MYH	mutY DNA glycosylase	Nucleus	enzyme		4595	70603	170841
NFE2L2	BM974200, HEBP1, IMDDHH, NRF2, nuclear factor, erythroid 2-like 2, nuclear factor, erythroid derived 2, like 2	nuclear factor, erythroid 2 like 2	Nucleus	transcription regulator	RTA 408	4780	18024	83619
NIN	3110068G20RIK, AI385615, AU024711, GSK3B-interacting, LOC100911256, mKIAA1565, NINEIN, ninein-like, SCKL7	ninein	Cytoplasm	other		51199	18080	299117|100911256
PARP1	5830444G22Rik, Adprp, Adprp1, ADPRT, ADPRT 1, AI893648, ARTD1, C80510, msPARP, pADPRT-1, PARP, PARS, POLY(ADP-RIBOSE) POLYMERASE 1, poly (ADP-ribose) polymerase family, member 1, PPOL, sPARP-1	poly(ADP-ribose) polymerase 1	Nucleus	enzyme	talazoparib, SC10914, olaparib, ABT-767, rucaparib, [18F]fluorthanatrace, INO-1001, simmiparib, veliparib, poly ADP ribose polymerase 1 inhibitor, CEP-9722, niraparib, 2X-121, senaparib, fluzoparib	142	11545	25591
PDE4DIP	4732458A06Rik, 9430063L05RIK, C87016, CMYA2, D130016K21RIK, D3Bwg1078e, LOC100134230, LOC101060344, LOC64183, mKIAA0454, MMGL, Myomegalin, phosphodiesterase 4D interacting protein, phosphodiesterase 4D interacting protein (myomegalin), USMG4	phosphodiesterase 4D interacting protein	Cytoplasm	enzyme		9659	83679	64183
PDGFRA	AI115593, APDGFR, CD140A, PDGFACE, Pdgfar, PDGFR-2, PDGFR alpha, Pdgf receptor-α, PDGFR- α, PDGF α R, Pdgf α Receptor, platelet derived growth factor receptor alpha, platelet derived growth factor receptor, alpha polypeptide, platelet derived growth factor receptor α, platelet derived growth factor receptor, α polypeptide, α-pdgfr	platelet derived growth factor receptor alpha	Plasma Membrane	kinase	DCC-2618, nintedanib, dasatinib, imatinib/sirolimus, imatinib/sorafenib, avapritinib, midostaurin, filgrastim/imatinib, lapatinib/pazopanib, imatinib/inotuzumab ozogamicin, lenvatinib, olaratumab, imatinib/sunitinib, sunitinib, axitinib, 5-azacytidine/midostaurin, regorafenib, pazopanib, telatinib, imatinib, crenolanib, becaplermin, doxorubicin/olaratumab, amuvatinib, imatinib/nilotinib, imatinib…	5156	18595	25267
PIK3C2B	C2-PI3K, C330011J12, C330011J12Rik, Gm199, phosphatidylinositol-4-phosphate 3-kinase catalytic subunit type 2 beta, phosphatidylinositol-4-phosphate 3-kinase, catalytic subunit type 2 beta, phosphatidylinositol-4-phosphate 3-kinase catalytic subunit type 2 β, phosphatidylinositol-4-phosphate 3-kinase, catalytic subunit type 2 β, PI3K-C2beta, Pi3k β	phosphatidylinositol-4-phosphate 3-kinase catalytic subunit type 2 beta	Cytoplasm	kinase		5287	240752	289021
PIK3CA	6330412C24RIK, caPI3K, CLAPO, CLOVE, CWS5, MCAP, MCM, MCMTC, p110, p110-alpha, P110 α, phosphatidylinositol-4,5-bisphosphate 3-kinase catalytic subunit alpha, phosphatidylinositol-4,5-bisphosphate 3-kinase, catalytic subunit alpha, phosphatidylinositol-4,5-bisphosphate 3-kinase catalytic subunit α, phosphatidylinositol-4,5-bisphosphate 3-kinase, catalytic subunit α, PI3K, PI3K-alpha, PI3K alpha i…	phosphatidylinositol-4,5-bisphosphate 3-kinase catalytic subunit alpha	Cytoplasm	kinase	alpelisib/fulvestrant, PWT33597, AZD8835, taselisib, bimiralisib, copanlisib, alpelisib, dactolisib, PKI-179, serabelisib, BAY1082439, pilaralisib, PX-866, SF 1126, pictilisib, CLR457, buparlisib, alpelisib/trastuzumab emtansine, GDC-0077	5290	18706	170911
PIK3CG	5830428L06Rik, IP3-gamma, IP3-γ, p110gamma, P110-γ, p120-PI3K, phosphatidylinositol-4,5-bisphosphate 3-kinase catalytic subunit gamma, phosphatidylinositol-4,5-bisphosphate 3-kinase, catalytic subunit gamma, phosphatidylinositol-4,5-bisphosphate 3-kinase catalytic subunit γ, phosphatidylinositol-4,5-bisphosphate 3-kinase, catalytic subunit γ, PI3CG, PI3K, PI3K CS, PI3Kgamma, PI3K p110gamma, PI3K …	phosphatidylinositol-4,5-bisphosphate 3-kinase catalytic subunit gamma	Cytoplasm	kinase	PX-866, SF 1126, pictilisib, CLR457, bimiralisib, PI3Kg inhibitor, buparlisib, dactolisib, tenalisib, pilaralisib	5294	30955	298947
PMS2	AW555130, HNPCC4, MLH4, PMS1 homolog 2, mismatch repair system component, PMS2CL, PMSL2, Rsph10b	PMS1 homolog 2, mismatch repair system component	Nucleus	enzyme		5395	18861
PTCH1	A230106A15RIK, BCNS, mes, NBCCS, patched 1, PTC, PTC1, PTCH, Ptch2, wig	patched 1	Plasma Membrane	transmembrane receptor		5727	19206	89830
PTEN	10q23del, 2310035O07RIK, A130070J02Rik, AI463227, B430203M17RIK, BZS, CWS1, DEC, GLM2, MHAM, Mmac, MMAC1, MUTATED IN MULTIPLE ADVANCED CANCERS, mutated in multiple advanced cancers 1, phosphatase and tensin homolog, PTEN1, PTENbeta, TEP1	phosphatase and tensin homolog	Cytoplasm	phosphatase		5728	19211	50557
PTPRD	1110002J03RIK, 3000002J10Rik, B230219D21RIK, HPTP, HPTPD, HPTPDELTA, MGC36851, Protein-tyrosine phosphatase delta, protein tyrosine phosphatase receptor type D, protein tyrosine phosphatase, receptor type, D, Protein-tyrosine phosphatase δ, PTPD, PTP-δ, RPTPDELTA, R-PTP-δ	protein tyrosine phosphatase receptor type D	Plasma Membrane	phosphatase		5789		313278
RALGDS	Gnds, Hs.560937, mKIAA1308, RalGDSB, RalGEF, ral guanine nucleotide dissociation stimulator, RGDS, RGF	ral guanine nucleotide dissociation stimulator	Cytoplasm	other		5900	19730	29622
RRM1	LOC100361270, R1, RIBONUCLEOTIDE REDUCTASE, ribonucleotide reductase catalytic subunit M1, RIBONUCLEOTIDE REDUCTASE M1, RIR1, RnrM1, RNR subunit R1, RR1	ribonucleotide reductase catalytic subunit M1	Nucleus	enzyme	L-asparaginase/gemcitabine/oxaliplatin, alemtuzumab/cyclophosphamide/fludarabine phosphate/rituximab, cyclophosphamide/fludarabine phosphate, ribonucleotide reductase inhibitor, cetuximab/gemcitabine, clofarabine/filgrastim/idarubicin, docetaxel/gemcitabine/vincristine, cladribine/cytarabine/filgrastim/idarubicin/plerixafor, cladribine, cytarabine/fludarabine phosphate/oxaliplatin/rituximab, gemc…	6240	20133	685579
SGK1	serum/glucocorticoid regulated kinase 1, Serum/Glucocorticoid Regulated Serine/Threonine Protein Kinase, SGK	serum/glucocorticoid regulated kinase 1	Cytoplasm	kinase		6446	20393	29517
SMAD2	7120426M23RIK, hMAD-2, hSMAD2, JV18, JV18-1, MADH2, MADR2, mMad2, SMAD family member 2	SMAD family member 2	Nucleus	transcription regulator		4087	17126	29357
SMAD4	AW743858, D18Wsu70e, DPC4, JIP, MADH4, MYHRS, SMAD family member 4, Smaug1	SMAD family member 4	Nucleus	transcription regulator		4089	17128	50554
SMARCA4	b2b508.1Clo, b2b692Clo, BAF190, BAF190A, BRG, BRG1, CSS4, HP1-BP72, hSNF2b, MRD16, RTPS2, SNF2, SNF2-beta, SNF2L4, SNF2LB, SNF2-β, SW1/SNF, SWI2, SWI/SNF related, matrix associated, actin dependent regulator of chromatin, subfamily a, member 4	SWI/SNF related, matrix associated, actin dependent regulator of chromatin, subfamily a, member 4	Nucleus	transcription regulator		6597	20586	171379
SYK	p72-Syk, Ptk72, spleen associated tyrosine kinase, spleen tyrosine kinase	spleen associated tyrosine kinase	Cytoplasm	kinase	SKI-O-592, cerdulatinib, fostamatinib, HMPL-523, GSK2646264, R-348, entospletinib, lanraplenib, TAK-659	6850	20963	25155
SYNE1	8B, A330049M09Rik, AMCM, ARCA1, BE692247, C130039F11Rik, C6orf98, CPG2, dJ45H2.2, EDMD4, KASH1, LOC102546492, mKIAA1756, MYNE1, Nesp1, NESPRIN-1, SCAR8, spectrin repeat containing, nuclear envelope 1, spectrin repeat containing nuclear envelope protein 1, Synaptic Nuclei Expressed Gene1 β, SYNE-1A	spectrin repeat containing nuclear envelope protein 1	Nucleus	other		23345	64009	499010
TCF7L2	LOC683733, TCF-4, TCF4B, TCF4E, transcription factor 7 like 2, transcription factor 7 like 2, T cell specific, HMG box	transcription factor 7 like 2	Nucleus	transcription regulator		6934	21416	679869
TET1	2510010B09Rik, AA517754, bA119F7.1, BB001228, CXXC6, D10Ertd17e, LCX, mKIAA1676, tet methylcytosine dioxygenase 1	tet methylcytosine dioxygenase 1	Nucleus	enzyme		80312	52463	309902
TGFBR2	1110020H15Rik, AAT3, AU042018, DNIIR, FAA3, LDS1B, LDS2, LDS2B, MFS2, RIIC, RIIDN, TAAD2, TbetaR-II, TBR-II, TBRLL, TGFbeta1R2, TGF-beta 2, Tgf beta2 receptor, TGFbeta R2, TGF-beta receptor 2, TGF-beta receptor type 2, TGF beta receptor type II, TGFbeta-RII, Tgfbr2T, TGFB receptor II, Tgfbrii, TGFR-2, TGFβ1R2, TGF-β 2, TGFβ R2, TGF-β receptor 2, TGF-β receptor type 2, TGF β receptor type II, TGFβ…	transforming growth factor beta receptor 2	Plasma Membrane	kinase	IMC-TR1	7048	21813	81810
TP53	bbl, BCC7, bfy, bhy, BMFS5, LFS1, p44, P53, P53 cellular tumour antigen, p53 tumor suppressor, transformation related protein 53, TRP53, tumor protein p53, tumour protein p53	tumor protein p53	Nucleus	transcription regulator	BI 907828, cenersen, kevetrin, azurin 50-77, APR-246, ALT-801, COTI-2, CGM097	7157	22059	24842
TSHR	AI481368, CHNG1, hTSHR-I, hypothroid, hyt, LGR3, pet, thyroid stimulating hormone receptor, THYROTROPIN receptor, TSHRA, Tsh Receptor	thyroid stimulating hormone receptor	Plasma Membrane	G-protein coupled receptor	ORG 41841	7253	22095	25360
UBR5	DD5, EDD, EDD1, HYD, Rat100, ubiquitin protein ligase E3 component n-recognin 5	ubiquitin protein ligase E3 component n-recognin 5	Nucleus	enzyme		51366	70790
USP9X	5730589N07Rik, AA407302, AA407699, AL022658, AL022749, DFFRX, FAF, Fafl, FAF-X, FAM, MRX99, MRXS99F, RGD1560056, ubiquitin specific peptidase 9, X chromosome, ubiquitin specific peptidase 9 X-linked, ubiquitin specific peptidase 9, X-linked	ubiquitin specific peptidase 9 X-linked	Plasma Membrane	peptidase		8239	22284	363445
