# Supplementary material for: Identification of Novel Mutations in Colorectal Cancer Patients using Ampliseq Comprehensive Cancer Panel
Source: Preprints.org preprint supplement (doi:10.20944/preprints202104.0401.v1), 2021-04-15
Supplement: Supplementary file 4 [file supplementary › supplementary tables/Supplementary Table S7.xlsx]

## Sheet: Sheet6
Supplementary Table 7
Gene ID_CRC_Panel	Row Labels	Max of VAF	Min of VAF	Average of VAF	Count of patients with this variant	Number of patient with VAF 100 or 50	A1	A2	MAF	LI_Pathogenic	Pathogenic	LI_Somatic	Somatic
XPC	chr3:14197987	100	99.5	99.9817	93	93	A	T	0.2
DDB2	chr11:47238522	100	98	99.8333	93	92	T	C	0.2556
BCL2L2	chr14:23777374	100	99.5	99.9728	92	92	A	G	0.3889
SUFU	chr10:104389932	100	99.5	99.9912	91	91	T	G	0.2778
FN1	chr2:216272900	100	98.5	99.9609	92	91	T	G	0.4222
PDGFRA	chr4:55141055	100	98.8	99.8935	92	91	A	G	0.2556
IGF2R	chr6:160505199	100	99	99.9196	92	91	C	G	0.3222
RECQL4	chr8:145738768	100	99.4	99.9846	91	91	-	G	0.1889
SGK1	chr6:134494548	100	98.9	99.8967	92	90	C	T	0.2889
NUMA1	chr11:71714528	100	50	97.3598	92	89	T	G	0.3167
CDH20	chr18:59170304	100	97.5	99.9022	91	89	G	C	0.2556
ALK	chr2:29416572	100	97.5	99.8152	92	89	T	C	0.2222
NTRK3	chr15:88679785	100	98.2	99.9375	88	87	A	G	0.3778
CHEK1	chr11:125525195	100	45.9	97.7571	91	85	A	G	0.2944
COL1A1	chr17:48265495	100	12.5	96.9736	91	85	T	C	0.4
CDH2	chr18:25565082	100	97.2	99.6761	92	85	A	G	0.2
PKHD1	chr6:51924774	100	46.2	99.2563	87	85	A	G	0.4667
KRAS	chr12:25368462	100	95.6	99.4925	93	84	C	T	0.1333
RNF213	chr17:78298938	100	77	99.478	91	84	A	G	0.2611
PRKDC	chr8:48805817	100	96	99.82	90	84	G	-	0.2
TSHR	chr14:81610583	100	37.5	94.0957	92	83	G	C	0.2667
SEP9	chr17:75494705	100	26.7	97.2333	90	83	G	A	0.2833
LTF	chr3:46501285	100	32.4	97.7218	87	83	CTT	-	0.3889
RPS6KA2	chr6:167271711	100	45.7	96.0837	92	83	T	C	0.2667
DDR2	chr1:162743418	100	99.1	99.8914	81	81	T	G	0.4556
NUMA1	chr11:71728909	100	39.5	94.48	90	81	-	GTCAAC	0.2333
CRBN	chr3:3197871	100	39.7	95.892	88	81	T	C	0.4611
WRN	chr8:31005018	100	95.9	99.8536	84	80	C	-	0.3333
MEN1	chr11:64572018	100	41.5	97.9283	92	79	C	T	0.4333				1
NUMA1	chr11:71714526	100	49.6	96.9	92	79	G	C	0.3167
AURKA	chr20:54961463	100	36.8	93.1867	90	79	T	C	0.1944
IGF2R	chr6:160494409	100	30	95.3522	92	79	A	G	0.2389
AKAP9	chr7:91714911	100	49.4	99.078	91	79	C	T	0.4667
RECQL4	chr8:145742716	100	96	99.938	79	78	A	C	0.07778
LAMP1	chr13:113965176	100	37.1	98.0765	85	77	A	C	0.3278
BIVM-ERCC5	chr13:103514091	100	96.2	99.5966	87	76	T	C	0.4889
PIK3R2	chr19:18273047	100	27.7	91.2136	88	76	T	C	0.4889
ERG	chr21:39870310	100	40.3	93.4718	85	75	A	G	0.3611
ESR1	chr6:152201875	100	98.6	99.9618	76	74	C	T	0.03333
MEN1	chr11:64572557	100	94.3	99.8554	74	73	G	A	0.04444
ALK	chr2:30143499	100	31.9	94.9857	91	73	C	G	0.2333
PDGFRA	chr4:55161391	100	97.7	99.836	75	73	C	T	0.2222
PIK3CG	chr7:106508987	100	44.4	94.2588	85	73	C	T	0.4333
RECQL4	chr8:145742514	100	94.3	99.8092	76	73	G	A	0.1333
IKBKE	chr1:206647742	100	96.7	99.488	92	72	G	A	0.3667
CDH2	chr18:25573622	100	97.5	99.8934	76	72	C	G	0.1444
PIK3CG	chr7:106508978	100	38.5	94.1341	85	72	G	A	0.4333
IKBKB	chr8:42175303	100	17.9	89.6202	89	72	A	T	0.3278
IRS2	chr13:110408608	100	27.5	92.6885	87	71	C	T	0.3833
NIN	chr14:51239067	100	98.7	99.6948	77	71	C	G	0.3556
MARK4	chr19:45801018	100	53.5	99.1789	76	71	C	T	0.2778
BCR	chr22:23627369	100	37.9	95.7726	84	71	G	A	0.02778
NFKB1	chr4:103514658	100	51	98.5776	76	71	C	T	0.3222
PDGFRA	chr4:55161254	100	43.2	90.936	86	71	T	C	0.3222
NOTCH4	chr6:32172065	100	36.8	88.5356	87	71	T	G	0.3944
NFKB2	chr10:104157727	100	44.1	97.769	87	70	C	T	0.4556
NFKB2	chr10:104160434	100	96.9	99.9153	72	70	G	A	0.06667
FLT3	chr13:28636084	100	26.7	97.4076	92	70	G	A	0.4944
KDR	chr4:55948108	100	95.8	99.6299	77	70	G	A	0.2667
MUTYH	chr1:45798555	100	44.4	95.2176	85	69	C	T	0.2778
BIVM-ERCC5	chr13:103527930	100	94.7	99.3213	89	69	C	G	0.4
AXL	chr19:41743861	100	97.4	99.3478	92	69	G	A	0.3
EPHB1	chr3:134514579	100	52.3	98.9534	88	69	C	T	0.08889
MYCL1	chr1:40363054	100	28.6	94.6482	83	68	C	G	0.1167
NIN	chr14:51224374	100	24.9	87.9879	91	68	T	G	0.3167
FN1	chr2:216235089	100	95.7	99.8843	70	68	T	C	0.1111
RPS6KA2	chr6:166952264	100	30.4	88.9483	89	68	G	A	0.3167
ADAMTS20	chr12:43846272	100	32.4	90.7337	89	67	T	C	0.4889
TRRAP	chr7:98558880	100	32.9	92.7312	77	65	C	G	0.1944				1
AFF3	chr2:100343557	100	98.3	99.8544	68	65	T	C	0.2444
LTF	chr3:46484898	100	44.9	89.2977	88	65	T	G	0.3722
PKHD1	chr6:51875250	100	47.7	98.7626	91	65	A	C	0.3611
UBR5	chr8:103372743	100	99.2	99.9785	65	65	A	G	0.07778
NFKB2	chr10:104159196	100	93.8	99.4675	80	64	G	A	0.03333
COL1A1	chr17:48268223	100	95	99.7097	72	64	G	A	0.07778
SEP9	chr17:75303298	100	36.4	88.2687	83	64	C	T	0.3222
SRC	chr20:36030939	100	95.6	99.2304	92	64	C	G	0.4778
RPS6KA2	chr6:166826304	100	31.8	91.1639	83	64	C	T	0.02222
AKAP9	chr7:91632306	100	33	85.108	87	64	C	T	0.4222
TAL1	chr1:47685455	100	97.4	99.6816	76	63	C	T	0.02222
PIK3R2	chr19:18279638	100	36.4	88.7919	86	63	C	T	0.35
FGFR3	chr4:1807894	100	88.5	99.355	80	63	A	G	0.05556
RPS6KA2	chr6:166827436	100	29.9	87.336	86	63	C	T	0.1167
RET	chr10:43606687	100	41.2	88.0057	87	62	A	G	0.4556				1
EGFR	chr7:55266417	100	37.4	94.5526	76	62	C	T	0.4167				1
CDH11	chr16:65016087	100	33.8	84.2099	91	62	A	C	0.2778
COL1A1	chr17:48269302	100	27.7	89.4035	85	62	G	A	0.3667
TSHR	chr14:81574959	100	40.8	83.9545	88	61	A	G	0.3833
TSHR	chr14:81575005	100	37	83.8284	88	61	C	A	0.3833
ASXL1	chr20:31022959	100	95.8	99.8603	63	61	C	T	0.03333
EPHA7	chr6:93982124	100	38.5	95.5419	74	61	G	A	0.3278
DICER1	chr14:95556747	100	40.4	90.8674	86	60	A	T	0.4778
NCOA1	chr2:24974945	100	29.2	87.1218	87	60	G	T	0.4556
BRD3	chr9:136913355	100	17.9	85.7725	91	59	C	T	0.2389				1
CASC5	chr15:40913840	100	28.3	82.9699	83	59	T	G	0.4444
EPHB4	chr7:100411278	100	33.8	83.4365	85	59	T	C	0.3944
RALGDS	chr9:135974079	100	27.9	91.1077	78	59	C	G	0.02778
RET	chr10:43613843	100	30.8	79.9169	83	58	T	G	0.4278		1		1
LRP1B	chr2:141571329	100	24.2	84.2841	82	58	C	T	0.3389				1
NCOA1	chr2:24905927	100	32.3	87.8208	77	58	C	G	0.3778
RPS6KA2	chr6:166826255	100	31.1	86.36	80	58	A	G	0.02778
FN1	chr2:216300482	100	34.9	83.1663	83	57	A	T	0.2889
ITGB2	chr21:46314907	100	95	99.4929	70	57	A	T	0.02222
MYH9	chr22:36691607	100	28.3	91.9818	66	57	C	A	0.03333
SF3B1	chr2:198257795	100	36.8	83.1483	87	56	T	C	0.3944	0		1	1
NIN	chr14:51204996	100	35	79.2066	76	56	T	C	0.4889
ITGA10	chr1:145535921	100	26.8	84.0828	87	55	C	T	0.4667
NF1	chr17:29546175	100	31.1	88.0229	83	55	T	C	0.3722
MTOR	chr1:11288758	100	25	77.9906	85	54	A	G	0.3167				1
PIK3C2B	chr1:204438643	100	37.2	94.7611	72	54	T	G	0.1944
HSP90AA1	chr14:102568367	100	18.6	83.3693	88	54	T	A	0.2889
FGFR4	chr5:176518784	100	19.7	81.4	84	54	T	C	0.3111
PLEKHG5	chr1:6530966	100	96.4	99.8386	57	53	G	-	0.1
DPYD	chr1:97547831	100	98.4	99.8455	55	53	A	G	0.2444
FGFR2	chr10:123298158	100	34	81.2882	85	53	C	T	0.4278
RRM1	chr11:4159466	100	23	81.7299	87	53	G	A	0.4389
ERBB3	chr12:56477694	100	31.3	81.6655	84	53	T	A	0.4389
FN1	chr2:216249587	100	35.8	83.5086	81	53	T	C	0.3667
EML4	chr2:42515388	100	45.6	92.3215	65	53	G	A	0.2
ITGA9	chr3:37512646	100	31.7	81.4718	78	53	CC	TG	0.1333
BAI3	chr6:69666684	100	39	87.7366	82	53	G	A	0.35
SMO	chr7:128846328	100	29.3	89.841	83	52	C	G	0.3				1
COL1A1	chr17:48272055	100	30.4	84.6526	78	52	T	C	0.02222
RNF213	chr17:78327358	100	25	78.7346	81	52	A	G	0.4778
DCC	chr18:49867224	100	37.8	98.3367	79	52	C	T	0.2222
RAD50	chr5:131892979	100	54.5	96.2027	74	52	A	G	0.3
FLT4	chr5:180047863	100	96.3	99.4286	70	52	G	C	0.07778
EZH2	chr7:148543525	100	37.1	80.9291	79	52	G	A	0.4722
IKBKE	chr1:206647787	100	35.3	85.831	87	51	C	T	0.07222
DPYD	chr1:98348885	100	32.6	85.1413	75	51	A	G	0.2889
FLT1	chr13:28886113	100	73.2	99.1517	58	51	G	A	0.3389
ERCC4	chr16:14026007	100	41.9	98.0727	55	51	A	G	0.3556
COL1A1	chr17:48266669	100	31.3	89.6157	89	51	C	G	0.05556
RECQL4	chr8:145737636	100	96	99.1449	78	51	G	A	0.1667
MARK1	chr1:220789236	100	40	98.7269	52	50	T	C	0.2
LPHN3	chr4:62598689	100	25	78.9939	82	50	T	C	0.45
SF3B1	chr2:198265526	100	31	80.7286	84	49	G	A	0.2833	0		1	1
RB1	chr13:48919358	100	30	93.0838	74	49	G	T	0.1333
PIK3CA	chr3:178922274	100	27.5	80.9654	78	49	A	C	0.3778
PKHD1	chr6:51732807	100	32.2	84.2786	84	49	T	C	0.4944
PAX5	chr9:36840623	100	20.1	82.0713	80	49	A	G	0.2889
RNF213	chr17:78319136	100	32.2	76.98	80	48	A	G	0.3889				1
ALK	chr2:29455267	100	35.2	75.2932	88	48	G	A	0.4				1
SDHB	chr1:17380497	100	45.5	98.387	77	48	T	G	0.3278
HSP90AA1	chr14:102550803	100	21.1	81.4325	77	48	A	G	0.1111
CDKN2A	chr9:21968199	100	20.7	89.2196	92	48	C	G	0.1944
PDE4DIP	chr1:145016020	100	75	98.8608	51	47	G	T	0.3111
PLEKHG5	chr1:6579607	100	51	89.8044	90	47	C	T	0.2778
NIN	chr14:51223789	100	35.1	84.8589	90	47	C	T	0.3722
PDGFRA	chr4:55151959	100	40.3	91.4537	54	47	A	-	0.1833
SYNE1	chr6:152793412	100	27.7	83.6075	80	47	A	C	0.2444
RPS6KA2	chr6:167271716	100	30.8	82.9892	83	47	T	C	0.4222
KDM6A	chrX:44833841	100	30.2	95.5712	52	47	A	C	0.12
AR	chrX:66941597	100	62.1	99.1714	49	47	G	T	0.104
BCL10	chr1:85741921	100	36.6	89.9684	57	46	C	G	0.3889
DDB2	chr11:47259668	100	25	77.2718	85	46	C	T	0.4667
CDH11	chr16:65025658	100	28.6	88.3725	69	46	C	T	0.1333
COL1A1	chr17:48271433	100	36	84.6493	67	46	G	A	0.05
WRN	chr8:30924557	100	16.5	79.0714	77	46	C	T	0.4444
MTOR	chr1:11205058	100	34.2	75.5632	87	45	T	C	0.4667
PIK3C2B	chr1:204433512	100	42.7	93.9981	52	45	C	-	0.08889
MDM4	chr1:204518842	100	33.6	79.7158	76	45	A	C	0.2778
TET1	chr10:70405855	100	28	87.6747	87	45	G	A	0.4056
POU5F1	chr6:31132649	100	18.6	81.713	77	45	C	A	0.03333
EPHA7	chr6:93964319	100	19.8	79.8099	81	45	T	C	0.3722
EPHA7	chr6:93967851	100	22.7	80.4133	75	45	T	C	0.3389
XPA	chr9:100459578	100	29.2	79.6662	77	45	C	T	0.1222
CMPK1	chr1:47842431	100	26.2	93.9727	88	44	A	G	0.4944
CASC5	chr15:40898643	100	21.2	84.8492	61	44	C	G	0.02222
CASC5	chr15:40915190	100	22.2	82.7972	71	44	G	A	0.1444
FN1	chr2:216272819	100	36.2	78.4221	68	44	G	C	0.3722
ESR1	chr6:152265522	100	21.2	79.7986	74	44	C	G	0.3722
SMO	chr7:128845018	100	32	88.1014	74	44	T	C	0.35
TFE3	chrX:48888074	100	41.3	91.6049	61	44	C	T	0.32
FLT3	chr13:28610183	100	21.8	74.745	80	43	A	G	0.4389				1
CDH1	chr16:68857441	100	21.7	75.2714	77	43	C	T	0.2889	0		1	1
RNF213	chr17:78302157	100	25.3	75.2899	79	43	A	C	0.3556
AFF1	chr4:88052219	100	23	76.5639	83	43	C	T	0.4278
EGFR	chr7:55228053	100	23.9	75.4013	79	43	T	A	0.4
PDE4DIP	chr1:144879375	100	90.6	98.9174	69	42	C	T	0.3556
NTRK1	chr1:156848995	100	32.8	75.8556	81	42	T	C	0.06111
PIK3C2B	chr1:204438334	100	45.5	94.2467	90	42	C	T	0.2667
SUFU	chr10:104356822	100	98.6	99.9349	43	42	G	A	0.04444
FANCJ-BRIP1	chr17:59760996	100	20.3	80.2136	66	42	G	A	0.25
PER1	chr17:8046772	100	13.4	80.4212	80	42	G	C	0.1167
EP300	chr22:41568480	100	26.4	74.7689	74	42	C	T	0.2833
FGFR4	chr5:176517461	100	26.9	78.4221	77	42	G	T	0.4778
EPHB4	chr7:100401270	100	98.8	99.875	44	42	G	T	0.1
CARD11	chr7:2962753	100	42	90.883	53	42	A	G	0.4111
LRP1B	chr2:141274576	100	27.4	90.8108	83	41	C	T	0.2778		1		1
MMP2	chr16:55523705	100	38.1	81.8836	67	41	C	T	0.1444
RNF213	chr17:78311508	100	28.8	77.8608	74	41	A	G	0.3944
ITGB2	chr21:46311813	100	25.8	85.1015	68	41	G	A	0.01667
ATR	chr3:142168331	100	32	85.5256	86	41	T	C	0.3
SDHA	chr5:230980	100	21.1	73.5544	79	41	G	A	0.1944
PKHD1	chr6:51618170	100	36.6	90.314	50	41	G	T	0.1833
NOTCH1	chr9:139410424	100	36.8	88.3346	52	41	G	A	0.1111
PLCG1	chr20:39797465	100	17.1	73.7602	83	40	C	T	0.2611				1
GNAS	chr20:57478807	100	26.7	77.8279	86	40	C	T	0.3889	0		1	1
ATRX	chrX:76937963	100	26.8	83.84	60	40	C	G	0.312	0		1	1
DDR2	chr1:162740327	100	33.3	96.2825	57	40	C	T	0.2111
MYH11	chr16:15818141	100	31.5	74.8101	79	40	A	C	0.4611
LRP1B	chr2:141533662	100	32.7	81.0383	81	40	C	T	0.1556
ALK	chr2:29917940	100	24.6	82.1051	79	40	G	C	0.1222
FLT4	chr5:180055862	100	32.9	80.4486	72	40	G	T	0.2056
EZH2	chr7:148504717	100	49.1	84.621	62	40	-	G	0.1111
CD79B	chr17:62007498	100	16.3	78.8422	83	39	G	A	0.2222	0		1	1
RRM1	chr11:4123345	100	32	86.3481	52	39	G	C	0.1778
AURKB	chr17:8108331	100	16.9	76.1846	78	39	G	A	0.3889
LRP1B	chr2:141945949	100	97.3	99.8756	41	39	T	C	0.05556
EPHB1	chr3:134670524	100	20	74.1675	77	39	T	C	0.09444
CRBN	chr3:3215954	100	42.8	94.8989	92	39	A	G	0.3333
CSF1R	chr5:149433596	100	22.4	85.7474	78	39	GA	TG	0.1111
NOTCH1	chr9:139396408	100	16.2	75.4557	70	39	G	A	0.3111
MTOR	chr1:11301714	100	32	77.2914	81	38	G	A	0.2611
FANCA	chr16:89805261	100	24.3	71.3653	75	38	G	A	0.4667
BIRC5	chr17:76219591	100	34	90.7206	68	38	A	G	0.2444
PIK3CA	chr3:178942431	100	25	82.4316	57	38	G	C	0.05556
NOTCH4	chr6:32184705	100	22.1	81.9516	64	38	A	G	0.06667
HSP90AB1	chr6:44220076	100	35.1	86.8018	55	38	C	T	0.2889
HNF1A	chr12:121416622	100	29.5	78.0381	63	37	G	C	0.02222	0		1	1
APC	chr5:112162854	100	18.3	70.4375	80	37	T	C	0.45	1	1	1	1
APC	chr5:112176325	100	15.6	74.1926	81	37	A	G	0.4389	0		1	1
ITGA10	chr1:145532549	100	94.2	98.5132	91	37	T	C	0.2889
FGFR2	chr10:123243197	100	25.2	71.3676	71	37	A	G	0.4611
IGF1R	chr15:99456553	100	21	75.58	75	37	A	G	0.1111
CDH5	chr16:66437131	100	17.9	73.7362	80	37	T	A	0.06111
COL1A1	chr17:48265426	100	15.8	84.9509	53	37	G	A	0.2333
RNF213	chr17:78354661	100	26	80.65	72	37	T	C	0.2944
MALT1	chr18:56390553	100	97.8	99.6465	43	37	G	A	0.07778
BCL6	chr3:187447032	100	34.1	79.7289	76	37	A	G	0.3333
FGFR4	chr5:176522728	100	23.8	74.1803	76	37	T	C	0.4778
FLT4	chr5:180053307	100	45	98.4	40	37	G	A	0.01111
EPHA7	chr6:94067981	100	33.1	74.0085	71	37	T	C	0.4667
EPHB4	chr7:100416250	100	38	84.0946	56	37	G	A	0.2556
CARD11	chr7:2966445	100	28.2	82.0029	68	37	G	T	0.1056
ALK	chr2:29543663	100	32.6	85.5203	64	36	C	T	0.1167				1
PDE4DIP	chr1:144859720	100	66.3	91.7667	54	36	C	G	0.03889
PARP1	chr1:226578099	100	23.1	72.5231	78	36	C	T	0.2389
MAML2	chr11:95825797	100	29.1	76.0615	78	36	G	A	0.3167
HNF1A	chr12:121437221	100	36	92.175	60	36	C	T	0.02222
HSP90AA1	chr14:102568296	100	20.8	77.5181	72	36	A	G	0.1
APC	chr5:112176559	100	21.3	74.4716	81	35	G	T	0.4389	0	1	1	1
FGFR2	chr10:123239112	100	23.2	72.7638	69	35	A	G	0.3222
RET	chr10:43595968	100	23.1	74.2456	68	35	G	A	0.3611
RNF213	chr17:78305871	100	23.8	71.6662	71	35	A	G	0.3222
TRIM24	chr7:138200117	100	42.2	85.8308	52	35	T	A	0.1889
PMS2	chr7:6036980	100	32.2	82.5704	54	35	C	G	0.4389
CSMD3	chr8:113254087	100	62.1	97.4373	51	35	A	G	0.05556
NTRK1	chr1:156785617	100	25.6	75.474	73	34	A	G	0.1056
ATM	chr11:108098460	100	18.5	76.9391	69	34	-	AA	0.03333
PGAP3	chr17:37830900	100	21.2	75.05	82	34	G	A	0.4944
COL1A1	chr17:48276971	100	26.3	71.4081	74	34	C	G	0.3778
FANCJ-BRIP1	chr17:59763347	100	32.2	77.7313	67	34	G	A	0.3
NUP214	chr9:134020092	100	24.1	79.8758	66	34	T	C	0.1944
APC	chr5:112177171	100	16.9	75.1468	62	33	A	G	0.01667	0		1	1
FAS	chr10:90771829	100	30	80.5881	59	33	C	T	0.1889
HSP90AA1	chr14:102548224	100	13.6	82.8254	67	33	C	T	0.1
EPHB1	chr3:134644636	100	28.2	69.4419	74	33	T	G	0.2
FGFR4	chr5:176523562	100	35.5	88.5044	45	33	A	C	0.005556
PKHD1	chr6:51491884	100	30.4	70.94	70	33	C	T	0.1889
PKHD1	chr6:51695647	100	29.7	69.0449	69	33	T	A	0.2833
WRN	chr8:30999122	100	30.9	71.8104	67	33	T	C	0.2667
ATR	chr3:142281612	100	30.1	68.8186	70	32	G	A	0.3889	0			1
IL7R	chr5:35861068	100	21.2	72.3313	67	32	C	T	0.2278	0			1
ABL1	chr9:133761001	100	25	75.5345	58	32	G	A	0.1333	0		1	1
HNF1A	chr12:121431300	100	15.9	72.9261	69	32	T	C	0.4167
FLT1	chr13:28883061	100	17.2	69.0528	72	32	A	G	0.2611
LRP1B	chr2:141283603	100	96.8	99.4872	39	32	G	T	0.04444
PAX3	chr2:223161624	100	41.6	84.5761	46	32	G	A	0.09444
LPHN3	chr4:62800728	100	31	72.3641	78	32	C	T	0.4944
LPHN3	chr4:62845490	100	24	69.3623	77	32	G	A	0.2389
PDGFRB	chr5:149495253	100	50	95.759	61	32	C	T	0.01111
ABL2	chr1:179087934	100	30	77.579	81	31	C	T	0.2889
MRE11A	chr11:94197260	100	19.9	68.9082	73	31	G	A	0.3556
TCF12	chr15:57524857	100	23.4	68.5859	71	31	C	T	0.1889
CDH5	chr16:66432423	100	15.5	59.4542	107	31	C	T	0.2833
PER1	chr17:8048169	100	24.2	77.4884	69	31	C	T	0.3611
CDH20	chr18:59157764	100	96.4	99.4436	39	31	C	T	0.04444
PDGFRB	chr5:149497177	100	18.1	74.2908	65	31	C	T	0.2833
SYNE1	chr6:152464839	100	32.8	73.9533	75	31	G	A	0.4
NOTCH1	chr9:139402663	100	32.6	72.0492	65	31	C	T	0.03889
EGFR	chr7:55249063	100	35.5	68.2653	75	30	A	G	0.2667		1		1
NOTCH1	chr9:139418260	100	25	76.5984	61	30	G	A	0.07778				1
TRIM33	chr1:114948281	100	39.4	89.3667	66	30	G	A	0.05556
CDK12	chr17:37671910	100	40	92.5314	35	30	A	G	0.01667
RNF213	chr17:78306280	100	28.6	79.8639	61	30	G	A	0.06667
SMARCA4	chr19:11136215	100	30	71.1356	73	30	G	C	0.2278
KDR	chr4:55980239	100	34.7	82.2437	48	30	T	C	0.1778
SYNE1	chr6:152683413	100	20.5	66.4889	72	30	T	G	0.2278
DST	chr6:56417545	100	18.1	71.4867	75	30	C	T	0.2
FANCG	chr9:35077441	100	37.8	74.3373	51	30	C	T	0.1778
SF3B1	chr2:198283305	100	29.7	81.4965	86	29	C	T	0.4	0		1	1
MTRR	chr5:7897319	100	25	68.2493	69	29	A	G	0.1222				1
MARK1	chr1:220825523	100	25.4	77.3867	60	29	G	A	0.03889
NF1	chr17:29679246	100	31.9	78.8309	55	29	A	G	0.08333
RNF213	chr17:78319380	100	24.6	71.4946	74	29	C	G	0.3667
RNF213	chr17:78323757	100	26.1	78.349	49	29	C	T	0.07778
RNF213	chr17:78333840	100	25.6	69.8638	69	29	C	T	0.3278
ALK	chr2:29498210	100	50	93.9796	54	29	G	A	0.1333
SETD2	chr3:47125385	100	25.3	71.0778	72	29	A	G	0.3889
TRRAP	chr7:98513300	100	36.8	82.4059	51	29	T	C	0.2722
ALK	chr2:29940529	100	31.9	86.07	60	28	T	A	0.06111		1		1
SETD2	chr3:47162661	100	21.3	71.4691	68	28	G	A	0.1722	0		1	1
CSF1R	chr5:149460553	100	25.1	70.2533	60	28	G	A	0.3111				1
MUC1	chr1:155162067	100	33.3	69.6061	66	28	T	C	0.09444
MLLT10	chr10:21827796	100	25.5	71.3241	58	28	A	G	0.1611
BCL11A	chr2:60687959	100	30.3	70.1324	74	28	G	A	0.1556
MYH9	chr22:36710183	100	18.6	67.3441	68	28	C	T	0.3889
KIT	chr4:55599436	100	38.6	83.8936	47	28	C	T	0.15
MTRR	chr5:7870973	100	31.8	70.8828	64	28	G	A	0.3
SYNE1	chr6:152805889	100	21.2	67.4935	62	28	T	C	0.1611
DST	chr6:56417282	100	27.3	75.5172	58	28	T	C	0.09444
EPHB4	chr7:100410657	100	37.5	85.1267	45	28	G	A	0.1778
POT1	chr7:124486980	100	15.6	78.602	49	28	C	T	0.2556
HNF1A	chr12:121435427	100	27.3	73.9032	62	27	A	G	0.03333	1	1	1	1
KEAP1	chr19:10600442	100	29.6	73.0353	68	27	C	G	0.2167	0		1	1
IL7R	chr5:35871190	100	22.1	73.4509	57	27	A	G	0.1944	0			1
HNF1A	chr12:121435475	100	27.3	76.1889	63	27	A	G	0.02222
SEP9	chr17:75489216	100	19.4	73.6843	51	27	T	C	0.25
SEP9	chr17:75489244	100	20.2	74.0902	51	27	G	A	0.25
AKT2	chr19:40742320	100	36.3	74.1469	49	27	C	T	0.1278
MAP2K2	chr19:4099187	100	29.4	71.9266	64	27	C	T	0.02222
SF3B1	chr2:198267771	100	38.6	77.4627	51	27	AA	-	0.07778
ITGB2	chr21:46313442	100	21.5	69.9909	66	27	T	G	0.1167
SYNE1	chr6:152711395	100	22.9	64.7	61	27	A	T	0.3722
PTPRD	chr9:8454566	100	17.5	69.5776	58	27	C	T	0.3333
LRP1B	chr2:141032088	100	34.4	68.4919	74	26	T	C	0.3889				1
RRM1	chr11:4141132	100	23.4	63.9119	59	26	A	C	0.2778
BUB1B	chr15:40477831	100	28.5	69.2141	64	26	A	G	0.1667
MMP2	chr16:55536687	100	18.5	66.1884	69	26	G	A	0.2667
LPHN3	chr4:62800554	100	27	69.4222	63	26	A	G	0.1167
CSF1R	chr5:149435759	100	36.4	69.9136	66	26	A	G	0.2611
TNFAIP3	chr6:138197331	100	26.8	68.1333	63	26	C	A	0.3444
SYNE1	chr6:152665261	100	20.1	63.3472	72	26	A	C	0.2944
MAP3K7	chr6:91296420	100	28.1	76.3841	44	26	G	C	0.02778
GRM8	chr7:126079144	100	25.2	72.3	59	26	G	A	0.2556
AKAP9	chr7:91712698	100	23.9	67.9812	69	26	G	A	0.2944
HNF1A	chr12:121416650	100	28.6	72.8755	49	25	C	A	0.02222	1	1	1	1
EGFR	chr7:55214348	100	24.6	66.8377	69	25	T	C	0.2556	1	1	1	1
PDE4DIP	chr1:144879264	100	28.4	69.2721	86	25	G	A	0.4111
IKBKE	chr1:206648378	100	32	72.9185	54	25	A	G	0.1222
HIF1A	chr14:62213848	100	35.8	78.7898	59	25	C	T	0.07222
TGM7	chr15:43579566	100	19.5	63.7296	54	25	G	A	0.1667
ASXL1	chr20:31019024	100	21.5	83.0103	39	25	T	C	0.1167
PTPRT	chr20:40743829	100	19.3	70.0642	67	25	G	A	0.2611
FLT4	chr5:180046344	100	16.7	80.3607	56	25	C	G	0.06667
LIFR	chr5:38527228	100	26.1	68.623	61	25	G	T	0.08889
ROS1	chr6:117724462	100	20.8	65.9788	66	25	A	C	0.2778
PKHD1	chr6:51586771	100	25	62.9443	79	25	A	G	0.06667
DST	chr6:56394173	100	37.6	72.513	46	25	C	T	0.08333
AKAP9	chr7:91641928	100	22.6	65.3449	78	25	G	A	0.3167
AKAP9	chr7:91715662	100	32.3	75.0373	75	25	T	C	0.3667
PDE4DIP	chr1:144882581	59.8	22.1	48.6854	89	24	G	A	0.4056
CBL	chr11:119148573	100	21.4	62.6369	65	24	T	G	0.2333
BUB1B	chr15:40494952	100	25.5	70.2076	66	24	T	A	0.2944
CDH5	chr16:66420885	100	23.2	63.7339	62	24	T	C	0.3389
CDH20	chr18:59166541	100	19.8	75.9517	60	24	T	C	0.15
ERCC2	chr19:45856468	100	28.6	67.1088	57	24	C	G	0.15
LRP1B	chr2:141473505	100	40.5	72.1922	51	24	T	A	0.2722
LPP	chr3:188327461	100	22.2	70.7241	58	24	T	C	0.07222
KDR	chr4:55953747	100	72.7	96.9333	39	24	-	CG	0.03333
NSD1	chr5:176721198	100	23.3	85.5037	54	24	C	T	0.2444
ROS1	chr6:117725578	100	19.4	61.5309	68	24	A	T	0.3444
SYNE1	chr6:152772264	100	32.5	69.2263	57	24	G	A	0.1056
RPS6KA2	chr6:166831694	100	17.9	67.4294	68	24	T	C	0.2889
EGFR	chr7:55238874	100	16	65.7902	61	24	A	T	0.3111
AKAP9	chr7:91713972	100	31	65.9955	66	24	T	C	0.1278
WRN	chr8:30973957	100	21.8	68.8182	55	24	T	G	0.15
PTPRD	chr9:8389364	100	18.2	60.8638	69	24	G	C	0.2278
HNF1A	chr12:121435342	100	24.4	72.2829	70	23	T	C	0.1111	1	1	1	1
ROS1	chr6:117678083	100	26.6	74.5552	58	23	G	A	0.07778				1
ESR1	chr6:152129077	100	25.9	68.7279	68	23	C	T	0.1611	0		1	1
RRM1	chr11:4159457	100	22.2	65.9517	60	23	G	A	0.3222
CCND1	chr11:69462910	100	16.8	68.0571	63	23	A	G	0.3556
PML	chr15:74328116	100	22.5	71.7914	58	23	G	A	0.05556
LRP1B	chr2:141528592	100	29.6	83.2211	38	23	C	T	0.03889
MSH6	chr2:48032937	100	41.7	77.4875	48	23	C	T	0.1333
PDGFRB	chr5:149495395	100	33.3	76.1956	45	23	C	T	0.02778
PKHD1	chr6:51483961	100	23.8	70.07	70	23	C	T	0.06111
RALGDS	chr9:135974100	100	23.7	68.7737	57	23	A	G	0.01667
G6PD	chrX:153760508	100	23.1	78.2833	42	23	G	A	0.048
DST	chr6:56463410	100	13.5	67.2053	57	22	C	T	0.3167				1
KDM6A	chrX:44938563	100	17.6	80.0091	44	22	A	G	0.128		1		1
PDE4DIP	chr1:144886063	59.7	25.8	47.5278	90	22	C	T	0.3667
ARNT	chr1:150808889	100	23.3	66.4915	59	22	G	C	0.1667
MRE11A	chr11:94225920	100	16.1	66.1293	58	22	T	C	0.2556
ATF1	chr12:51203371	100	31.8	66.364	50	22	T	C	0.2667
NIN	chr14:51237701	100	21.4	68.6698	53	22	G	A	0.06667
ERCC4	chr16:14041958	100	24.6	63.2983	58	22	C	T	0.3111
TSC2	chr16:2138218	100	27.3	67.2222	54	22	C	A	0.04444
MMP2	chr16:55539191	100	35.7	67.5279	68	22	G	C	0.25
ERBB2	chr17:37868715	100	22.5	61.7092	65	22	T	C	0.4111
RNF213	chr17:78306308	100	21.9	78.5447	47	22	G	C	0.07222
SMARCA4	chr19:11105608	100	22.8	60.7811	53	22	C	T	0.2944
TNK2	chr3:195615376	100	26.3	69.2	53	22	G	A	0.01667
ROS1	chr6:117724499	100	19.2	65.5758	66	22	C	A	0.2778
SYNE1	chr6:152461049	100	33.8	71.7722	54	22	-	TGTT	0.05
DST	chr6:56476262	100	31.8	68.3449	49	22	C	T	0.1389
EPHB6	chr7:142566163	100	29.6	62.9348	66	22	G	C	0.3556
EZH2	chr7:148508833	100	38.3	78.3605	43	22	G	A	0.2111
AKAP9	chr7:91726927	100	33.3	67.2732	56	22	C	A	0.08889
SSX1	chrX:48116786	100	20.4	80.9618	34	22	G	C	0.072
PBRM1	chr3:52643685	100	24	66.5017	60	21	C	T	0.3167				1
APC	chr5:112175770	100	17.8	72.3056	72	21	A	G	0.1222	0		1	1
PDE4DIP	chr1:144866662	99.8	37	54.8101	89	21	C	T	0.4389
FAS	chr10:90770439	100	39.7	72.8708	48	21	G	C	0.04444
EXT2	chr11:44117898	100	29.7	69.098	50	21	G	T	0.06111
CASC5	chr15:40915894	100	21.5	64.7746	63	21	C	T	0.3722
CDH11	chr16:65005462	100	30.4	70.7104	48	21	A	G	0.03333
RNF213	chr17:78306102	100	29.8	66.0164	55	21	C	G	0.05556
CDH2	chr18:25570228	100	88.9	97.7813	91	21	C	G	0.4778
EML4	chr2:42510018	100	90.7	98.1728	92	21	A	G	0.2556
XPO1	chr2:61749690	100	32	74.6405	37	21	T	C	0.02778
PLCG1	chr20:39794489	100	23.7	73.3	42	21	A	G	0.1222
BCR	chr22:23637200	100	28.6	67.4677	62	21	C	T	0.3278
TNK2	chr3:195595632	100	20.2	78.2457	35	21	G	A	0.04444
SYNE1	chr6:152809527	100	31.8	69.6169	59	21	T	A	0.1111
MEN1	chr11:64572602	100	41.8	67.8783	60	20	A	G	0.2278	0		1	1
ATR	chr3:142277536	100	22.6	63.941	61	20	G	A	0.3333	0		1	1
IL7R	chr5:35876274	100	35	62.6774	53	20	G	A	0.3				1
RALGDS	chr9:135983504	100	18.8	68.9333	57	20	C	T	0.06111	0		1	1
NOTCH1	chr9:139391636	100	26.8	71.9604	53	20	A	G	0.1722	0		1	1
PDE4DIP	chr1:144912233	67.2	18.3	45.5125	88	20	T	C	0.4111
PDE4DIP	chr1:144930940	64.9	31.7	48.4247	85	20	C	T	0.3444
TGM7	chr15:43571390	100	22	63.8018	55	20	G	C	0.2944
FANCA	chr16:89849480	100	28.4	67.0312	48	20	T	C	0.1
ITGB3	chr17:45368337	100	21.2	64.7313	64	20	C	A	0.25
CDH2	chr18:25562831	100	22.9	66.8294	68	20	T	C	0.1944
FBN3	chr19:8146019	100	99	99.8857	21	20	G	T	0.01111
FN1	chr2:216248708	100	37.5	67.2021	47	20	-	AA	0.2056
EML4	chr2:42396722	100	28.1	86.3821	39	20	G	A	0.01111
RUNX1	chr21:36206932	100	87.1	98.1411	56	20	A	G	0.06667
TIMP3	chr22:33253280	100	36.9	74.098	49	20	C	T	0.1056
AFF1	chr4:88053085	100	28.8	68.407	57	20	T	C	0.02778
PDGFRB	chr5:149509270	100	21	72.5854	41	20	G	A	0.1944
NOTCH4	chr6:32190406	100	34.5	62.6509	53	20	G	A	0.25
NOTCH4	chr6:32191730	100	63.6	91.7796	49	20	A	G	0.005556
AKAP9	chr7:91630620	100	21.3	58.78	70	20	T	G	0.2611
WRN	chr8:30999280	100	23.3	67.1463	54	20	T	G	0.1833
GPR124	chr8:37686749	100	17.4	69.3909	55	20	G	A	0.04444
LRP1B	chr2:141751592	100	35.3	64.8828	58	19	A	G	0.2056	0		1	1
ATR	chr3:142222284	100	26.7	63.2533	60	19	G	A	0.2889	1	1	1	1
PDE4DIP	chr1:144916748	60.6	29.1	48.8371	89	19	G	C	0.4
TNFRSF14	chr1:2488153	100	30	70.41	60	19	G	A	0.06111
AKT1	chr14:105242966	100	18.6	66.9167	42	19	C	T	0.07222
CASC5	chr15:40914177	100	26.7	65.7353	51	19	C	T	0.02778
CASC5	chr15:40914772	100	25.5	62.9734	64	19	T	C	0.4111
NF1	chr17:29670190	100	38.5	84.0839	31	19	G	C	0.02778
ITGB3	chr17:45380002	100	21.4	77.7794	34	19	C	T	0.04444
DCC	chr18:50936780	100	19.6	69.7157	51	19	A	G	0.1056
ERCC2	chr19:45855524	100	35.8	60.8021	48	19	A	G	0.2556
LRP1B	chr2:141359287	100	27.5	65.4229	48	19	T	C	0.1778
MYH9	chr22:36708084	100	28	81.7488	41	19	T	C	0.03889
CYP2D6	chr22:42523943	100	21.9	64.5982	56	19	G	A	0.02778
SYNE1	chr6:152647681	100	22.6	72.0379	58	19	T	A	0.04444
IGF2R	chr6:160468278	100	26.5	70.83	60	19	G	A	0.1556
DST	chr6:56507135	100	32.6	75.7326	43	19	C	T	0.2167
ETV1	chr7:14025766	100	20.3	68.5659	44	19	A	T	0.04444
PDE4DIP	chr1:144871889	64.6	25	50.3302	86	18	C	A	0.25
PDE4DIP	chr1:144882823	54.9	24	47.2364	88	18	T	C	0.4111
PDE4DIP	chr1:144917546	58.3	32.3	48.5224	85	18	G	A	0.3833
BLNK	chr10:97990583	100	27.3	63.0455	55	18	G	A	0.005556
ETS1	chr11:128333503	100	26.2	63.2825	57	18	C	T	0.3167
MRE11A	chr11:94212048	100	20.5	60.3831	59	18	T	C	0.2944
ATF1	chr12:51203376	100	32.2	66.8521	48	18	C	T	0.2556
BIVM-ERCC5	chr13:103504517	100	23.6	65.5567	60	18	C	T	0.2056
IGF1R	chr15:99467934	100	25.6	67.3795	44	18	C	A	0.1722
IGF1R	chr15:99478713	100	17.8	63.817	53	18	C	T	0.2111
COL1A1	chr17:48277061	100	10.4	82.3097	31	18	-	CCCCAGGCCCCAGGCCCCAGG	0.01667
BCL2	chr18:60985879	100	16.7	62.8941	51	18	C	T	0.2167
ERCC2	chr19:45867259	100	39.2	64.4692	52	18	T	C	0.15
ERCC2	chr19:45868309	100	21.2	68.2145	62	18	G	T	0.07222
STK36	chr2:219555262	100	29.5	61.4164	61	18	A	G	0.3333
XPO1	chr2:61749716	100	33.3	73.8889	36	18	T	C	0.02778
BCR	chr22:23632513	100	14.9	67.5106	47	18	G	A	0.03889
ITGA9	chr3:37574951	100	27.5	62.387	54	18	A	G	0.2222
EPHA3	chr3:89456555	100	36	62.376	50	18	A	T	0.2722
SYNE1	chr6:152658191	100	30	71.1833	42	18	C	T	0.06667
DST	chr6:56484758	100	21.9	65.6857	49	18	T	C	0.07778
EXT1	chr8:118819578	100	23	69.9549	51	18	T	C	0.08333
RALGDS	chr9:135982088	100	19.8	69.7431	51	18	C	A	0.1278
SYK	chr9:93650015	100	35	64.9403	62	18	A	T	0.3167
JAK1	chr1:65310489	100	19.3	54.883	47	17	C	T	0.2167	0		1	1
ACVR2A	chr2:148657117	100	28	60.28	60	17	A	G	0.3556	0		1	1
ATR	chr3:142277575	100	18	59.6566	53	17	T	A	0.1278	0		1	1
MUTYH	chr1:45797505	100	31.1	61.9115	52	17	G	C	0.2056
BMPR1A	chr10:88683122	100	30	65.3211	57	17	C	T	0.2222
ATM	chr11:108183167	100	22.2	82.404	50	17	G	A	0.02222
WT1	chr11:32439038	100	22.2	64.5098	51	17	C	T	0.1389
LTK	chr15:41805115	100	25.6	63.5519	52	17	A	G	0.1444
BIRC5	chr17:76210367	100	25	62.9642	53	17	C	G	0.2111
MYH9	chr22:36690113	100	20.5	69.7744	43	17	A	G	0.1944
SDHA	chr5:231111	100	28.6	65.8473	55	17	C	T	0.15
ROS1	chr6:117730819	100	20	56.4811	53	17	A	G	0.2
SYNE1	chr6:152540278	100	42	96.5609	92	17	A	C	0.3389
PKHD1	chr6:51891011	100	39.3	67.6571	56	17	C	T	0.2056
DST	chr6:56327849	100	22.9	63.4612	49	17	T	C	0.2667
DST	chr6:56359034	100	28.6	65.1659	41	17	A	C	0.1167
DST	chr6:56426931	100	27.8	62.8611	54	17	T	C	0.1444
PMS2	chr7:6026988	100	36	63.5018	56	17	A	G	0.3389
WRN	chr8:30933859	100	25	70.5176	34	17	T	C	0.05556
NOTCH1	chr9:139410177	100	28.9	65.9787	47	17	C	T	0.1
ERBB2	chr17:37884037	100	20.8	70.9403	77	16	G	C	0.3778	1	1	1	1
MET	chr7:116435768	100	26.2	62.5645	62	16	T	C	0.3389	0		1	1
PDE4DIP	chr1:144930596	58.5	31.5	48.0023	88	16	A	C	0.4222
TPR	chr1:186316656	100	30.9	63.2171	41	16	C	G	0.2278
MDM4	chr1:204516025	100	36.4	69.6083	48	16	G	A	0.1444
TET1	chr10:70332066	100	32.5	62.524	50	16	T	C	0.1167
CBL	chr11:119146659	100	23.3	60.3241	58	16	C	G	0.1833
ARID2	chr12:46215163	100	12	64.1739	46	16	A	G	0.04444
NIN	chr14:51192659	100	28.2	64.8174	46	16	A	G	0.1111
CASC5	chr15:40915045	100	25.6	66.4071	56	16	G	T	0.1056
IDH2	chr15:90634941	100	31.3	72.0737	38	16	G	A	0.03333
COL1A1	chr17:48277060	100	7.4	57.4455	55	16	-	GCCCCAGGCCCCAGGCCCCAG	0.07222
NLRP1	chr17:5425077	100	24.3	69.0843	51	16	C	T	0.04444
ZNF521	chr18:22775185	100	23.7	62.9698	53	16	T	C	0.1722
AFF3	chr2:100288931	100	22.2	70.7971	34	16	A	G	0.06667
FOXP1	chr3:71247576	100	41.2	79.2807	57	16	T	A	0.01111
NFKB1	chr4:103514741	100	20	59.8233	60	16	C	T	0.1111
SYNE1	chr6:152466674	100	28.3	62.7148	54	16	C	T	0.08333
POU5F1	chr6:31138377	100	25	68.82	40	16	T	C	0.005556
NOTCH4	chr6:32164869	100	33	61.6378	45	16	C	G	0.2722
ETV1	chr7:14017007	100	31.1	68.6667	39	16	TG	CC	0.07222
PDE4DIP	chr1:144874641	57.8	33.2	47.4721	86	15	C	G	0.3278
PDE4DIP	chr1:144886092	58.3	27.5	47.4011	89	15	T	C	0.3667
PDE4DIP	chr1:144922583	100	18.2	48.0043	69	15	A	G	0.1944
RNASEL	chr1:182551337	100	32.7	59.9306	49	15	C	A	0.1556
PIK3C2B	chr1:204413297	99.7	12.9	41.175	112	15	T	C	0.2556
MTR	chr1:237057608	100	29	59.7965	57	15	A	G	0.2722
PLEKHG5	chr1:6533393	100	28.3	63.7184	49	15	C	G	0.1556
ZNF384	chr12:6777111	100	96.5	99.5111	18	15	-	C	0.06667
BIVM-ERCC5	chr13:103527849	100	89.7	97.5764	89	15	C	G	0.3
NTRK3	chr15:88423463	100	19.5	68.825	48	15	T	C	0.02778
MYH11	chr16:15811023	100	21.9	66.8442	77	15	T	C	0.3278
TSC2	chr16:2138269	100	37.5	64.92	35	15	C	T	0.03889
FANCA	chr16:89869761	100	30	73.0611	36	15	C	T	0.03889
ERBB2	chr17:37879762	100	17.8	69.9526	78	15	A	G	0.03889
SEP9	chr17:75494746	100	23.8	64.7275	51	15	G	A	0.03889
AURKB	chr17:8108339	100	15.2	62.5474	57	15	A	G	0.2556
JAK3	chr19:17941294	100	37.9	64.0229	48	15	C	T	0.2333
FANCD2	chr3:10142949	100	20.6	72.2286	56	15	T	C	0.2333
TGFBR2	chr3:30686414	100	29.8	66.7391	46	15	G	A	0.05556
LTF	chr3:46480801	100	26.7	61.2056	54	15	G	A	0.01111
SYNE1	chr6:152461061	100	28.2	70.213	54	15	A	G	0.05
NOTCH4	chr6:32183175	100	40.4	64.875	52	15	A	G	0.3
WRN	chr8:31024638	100	25.2	65.31	50	15	T	C	0.3167
NBN	chr8:90967711	100	21.8	62.3895	57	15	G	A	0.2778
RALGDS	chr9:135978153	100	30.2	76.8647	34	15	C	G	0.06667
ALK	chr2:29416366	100	35.1	60.4741	54	14	C	G	0.1056	0		1	1
TET2	chr4:106196951	100	16.7	60.5585	53	14	G	A	0.1889	0		1	1
MET	chr7:116436022	100	17.5	53.5677	62	14	A	G	0.3222	0		1	1
NUP214	chr9:134021630	100	16.8	56.7175	40	14	G	A	0.1222				1
PDE4DIP	chr1:144854491	89.9	20.9	49.5807	88	14	G	T	0.4
PDE4DIP	chr1:144886197	69.4	21.1	46.0547	86	14	T	A	0.35
PAX7	chr1:19027239	100	18.1	58.339	41	14	G	A	0.1333
WT1	chr11:32417945	100	35.3	63.54	40	14	C	T	0.2056
MLL2	chr12:49444545	100	31.2	58.9175	40	14	A	G	0.07222
TRIP11	chr14:92473943	100	22.8	61.724	50	14	C	T	0.2833
PER1	chr17:8053085	100	22.4	65.7533	45	14	G	T	0.2333
MBD1	chr18:47801800	100	14	68.5071	42	14	A	G	0.01667
DCC	chr18:50937026	100	18.8	70.2877	57	14	G	A	0.08889
FN1	chr2:216242917	100	30.6	62.2395	38	14	A	T	0.04444
FN1	chr2:216283958	100	23.7	62.2564	39	14	A	T	0.1
CYP2D6	chr22:42525132	100	20.5	54.3189	53	14	C	G	0.2167
MLH1	chr3:37083740	100	22.3	60.8882	34	14	G	A	0.07222
NFKB1	chr4:103534560	100	25.9	60.8196	51	14	G	C	0.2111
LPHN3	chr4:62845388	100	34	91.2868	91	14	G	C	0.4
FGFR4	chr5:176517797	100	17.6	80.5202	84	14	C	T	0.3833
ROS1	chr6:117708971	100	27	62.8961	51	14	T	C	0.2444
SYNE1	chr6:152469188	100	21.7	61.7311	61	14	G	C	0.08889
SYNE1	chr6:152652034	100	18.4	65.2966	58	14	T	A	0.07778
SYNE1	chr6:152675854	100	19.5	67.2208	48	14	G	A	0.1278
RPS6KA2	chr6:166873010	100	16.2	58.2132	38	14	T	C	0.1222
DST	chr6:56482801	100	36.8	69.141	61	14	G	C	0.2611
PMS2	chr7:6026775	100	29.6	81.7422	90	14	C	T	0.3889
NBN	chr8:90970935	100	27.9	56.7583	48	14	A	G	0.1389
LRP1B	chr2:141260668	100	26	58.1571	56	13	G	A	0.3111	0		1	1
LRP1B	chr2:142567910	100	26.2	63.0324	37	13	C	T	0.01667		1		1
EP300	chr22:41548008	100	30	61.2476	42	13	G	A	0.04444	1	1	1	1
LTF	chr3:46480958	100	18.5	53.7478	46	13	G	C	0.2389				1
CTNNA1	chr5:138266546	100	23.8	63.3244	41	13	A	G	0.1222	0		1	1
RALGDS	chr9:135985796	99.8	33.2	61.3789	38	13	T	C	0.2167		1		1
PDE4DIP	chr1:144865850	63	34	46.8741	85	13	T	G	0.2333
PDE4DIP	chr1:144918957	58.1	33.8	47.4386	88	13	A	T	0.4333
PDE4DIP	chr1:144931330	66.2	34.5	50.5528	89	13	T	C	0.4111
PDE4DIP	chr1:144931392	58	39	49.4933	90	13	A	G	0.4389
ITGA10	chr1:145533175	100	35.3	63.5081	37	13	C	T	0.08333
JAK1	chr1:65325970	100	22.6	54.6792	48	13	T	C	0.08889
TET1	chr10:70332580	100	31.6	59.9657	35	13	G	A	0.05556
MLL2	chr12:49427652	100	37.5	60.9881	42	13	T	C	0.01667
NIN	chr14:51225132	100	19.2	60.2696	56	13	T	G	0.25
NIN	chr14:51227000	100	31	59.8225	40	13	G	A	0.2167
CASC5	chr15:40916237	100	20.1	59.904	50	13	G	A	0.2556
LTK	chr15:41796498	100	19.1	58.7526	38	13	A	T	0.1556
LTK	chr15:41796901	100	30.6	59.4737	38	13	T	G	0.2
PML	chr15:74336633	100	25	63.7471	51	13	C	T	0.2556
IGF1R	chr15:99478225	100	29.1	60.7321	53	13	A	G	0.1667
MMP2	chr16:55536727	100	17	62.6585	53	13	T	C	0.2167
TCF3	chr19:1619339	100	33.9	62.506	50	13	C	T	0.01667
ERCC2	chr19:45854919	100	34.1	59.0754	57	13	G	T	0.2944
LRP1B	chr2:141747249	100	26.6	63.4	36	13	T	A	0.1056
LRP1B	chr2:141747293	100	20.7	68.3237	38	13	C	T	0.1222
FN1	chr2:216272907	100	32.8	65.1978	46	13	T	A	0.1722
DNMT3A	chr2:25458546	100	33.8	63.5528	36	13	T	C	0.1667
ASXL1	chr20:31024274	100	30.3	60.45	44	13	C	T	0.2333
SMARCB1	chr22:24145672	100	97.8	99.8	14	13	C	-	0.03333
LTF	chr3:46484964	100	24.5	64.7296	54	13	A	G	0.2778
PBRM1	chr3:52692359	100	32.3	65.7794	34	13	G	C	0.03889
NOTCH4	chr6:32164874	99.7	34	61.6289	45	13	A	C	0.2722
PKHD1	chr6:51914956	100	41.5	62.5702	47	13	A	G	0.2389
DST	chr6:56425284	100	32.8	63.0324	34	13	G	A	0.07778
PMS2	chr7:6038722	100	33.2	60.3204	54	13	C	T	0.2167
CSMD3	chr8:113516209	100	3.4	55.6765	85	13	A	G	0.1444
CSMD3	chr8:114111250	100	15.9	61.6488	41	13	T	G	0.05556
NBN	chr8:90955624	100	29	59.6978	46	13	A	T	0.1444
FANCG	chr9:35074917	100	30.4	66.425	36	13	C	T	0.05556
G6PD	chrX:153760654	100	40.8	91.4333	18	13	A	G	0.104
AR	chrX:66943601	100	99.2	99.8692	13	13	-	A	0.088
MTOR	chr1:11190646	100	23.5	51.9025	40	12	A	G	0.09444	0		1	1
BIVM-ERCC5	chr13:103528002	100	37.1	67.3391	46	12	C	G	0.05556		1		1
NTRK3	chr15:88576185	100	25	63.7854	48	12	C	G	0.01111				1
EP300	chr22:41551039	100	26.5	71.6737	57	12	A	T	0.1556	0		1	1
PBRM1	chr3:52610651	100	16.5	57.7983	59	12	A	T	0.2556				1
CSF1R	chr5:149457678	100	36.4	60.4547	53	12	A	G	0.1444				1
EPHB6	chr7:142561448	100	88.9	99.1462	13	12	-	G	0.1333	0			1
JAK2	chr9:5050706	100	28.3	51.6978	46	12	T	C	0.2111				1
BCL9	chr1:147087721	100	28.7	55.1318	44	12	A	T	0.2278
PIK3C2B	chr1:204403659	100	33.4	53.6487	39	12	G	A	0.1389
MDM4	chr1:204512100	100	24.7	66.7089	79	12	C	T	0.1778
IKBKE	chr1:206651107	100	33.3	57.9449	49	12	A	G	0.1389
MTR	chr1:237048562	100	18.2	59.6879	33	12	A	G	0.1111
MTR	chr1:237054569	100	21.8	56.1829	35	12	G	A	0.2111
IRS2	chr13:110435953	100	31	62.9846	39	12	G	A	0.2389
ERCC4	chr16:14013993	100	20.8	61.6195	41	12	A	T	0.02778
MYH11	chr16:15853596	100	25	55.2	38	12	G	C	0.1611
IL21R	chr16:27456613	100	19.4	61.8417	48	12	C	G	0.1056
MMP2	chr16:55527113	100	25.8	57.0302	53	12	A	G	0.2389
ITGB3	chr17:45369777	100	23.1	60.7071	42	12	G	A	0.07222
ITGB3	chr17:45385012	100	19.5	59.1628	43	12	T	C	0.2056
RNF213	chr17:78293189	100	18.8	58.1125	48	12	T	A	0.1333
CDH2	chr18:25543387	100	26	61.9661	56	12	A	G	0.2611
MALT1	chr18:56400826	100	32.3	73.2689	45	12	C	T	0.1222
FZR1	chr19:3534842	100	36.5	61.6286	42	12	A	G	0.02222
SF3B1	chr2:198265173	100	8.3	70.3475	59	12	A	T	0.1944
FN1	chr2:216253039	100	39.4	65.7236	55	12	C	G	0.2056
PDGFB	chr22:39636928	100	36.1	81.3471	34	12	G	A	0.02778
ATR	chr3:142272314	100	23.9	62.8714	28	12	A	G	0.04444
PBRM1	chr3:52584432	100	25	66.4478	46	12	CTC	-	0.06667
PBRM1	chr3:52676065	100	38.5	64.6947	38	12	T	C	0.01667
NSD1	chr5:176636882	100	28.1	64.9714	42	12	T	C	0.07222
ROS1	chr6:117737390	100	21.8	54.3811	53	12	A	G	0.2167
SYNE1	chr6:152469331	100	17	62.2725	51	12	T	C	0.1222
PKHD1	chr6:51613177	100	17.6	56.0735	34	12	T	C	0.1111
PKHD1	chr6:51890823	100	25.8	63.6936	47	12	A	G	0.1278
EPHA7	chr6:94120192	100	34.8	66.9158	38	12	A	G	0.06111
POT1	chr7:124481245	100	22.1	60.43	40	12	A	G	0.1278
CSMD3	chr8:113363511	100	43.3	73.2172	29	12	C	T	0.01111
CSMD3	chr8:113662583	100	18.5	66.4042	48	12	C	A	0.1278
RECQL4	chr8:145737816	100	21.6	60.7643	42	12	T	C	0.05
RECQL4	chr8:145739924	100	31.8	63.5146	41	12	A	G	0.05
RECQL4	chr8:145741130	100	26.9	63.635	40	12	T	C	0.15
WRN	chr8:30999123	100	28.5	67.6018	55	12	A	G	0.1944
TSC1	chr9:135776034	100	39.5	65.3722	36	12	T	C	0.1667
NOTCH1	chr9:139412197	100	24.3	66.0315	54	12	A	G	0.1333
MTOR	chr1:11181327	100	32.5	54.63	40	11	T	C	0.04444	1	1	1	1
NTRK3	chr15:88680684	100	28.6	58.8891	46	11	A	G	0.1278				1
ALK	chr2:29446202	100	29	66.8	40	11	A	G	0.1778				1
PIK3R1	chr5:67522722	100	28.5	62.2943	35	11	T	C	0.1222				1
MET	chr7:116436097	100	28	61.4164	61	11	A	G	0.2778	0		1	1
CARD11	chr7:2976767	100	27.7	59.2	34	11	A	G	0.05				1
TAF1L	chr9:32634467	100	25	59.4485	33	11	C	T	0.1444	0		1	1
MTR	chr1:237058828	100	35.2	57.5471	51	11	T	C	0.2889
TNFRSF14	chr1:2494330	100	29.8	56.1595	37	11	A	G	0.05556
ARID1A	chr1:27099010	100	100	100	11	11	-	G	0.01111
ATM	chr11:108151707	100	23.1	74.9143	28	11	A	T	0.02222
CHEK1	chr11:125497466	100	32.4	68.8607	28	11	T	G	0.03889
WT1	chr11:32449420	100	22.7	57.78	30	11	A	C	0.07778
CASC5	chr15:40949526	100	36.3	67.2139	36	11	T	C	0.1333
ERCC4	chr16:14014240	100	31	68.8833	30	11	A	G	0.05
FANCA	chr16:89836323	100	34.3	60.1854	48	11	T	C	0.25
TCF3	chr19:1619333	100	34.2	60.5512	41	11	A	G	0.01111
NFE2L2	chr2:178098088	100	39.2	54.8556	27	11	-	A	0.15
FN1	chr2:216229692	100	30.6	62.5963	54	11	G	A	0.1611
FN1	chr2:216240127	100	38.8	67.216	25	11	-	AC	0.03333
FN1	chr2:216271812	100	37.1	64.5308	26	11	T	A	0.15
ITGB2	chr21:46330674	100	37.8	58.1051	39	11	A	C	0.1833
BCR	chr22:23523630	100	23.1	57.3385	52	11	A	C	0.25
SMARCB1	chr22:24158899	100	32.3	66.4636	33	11	A	C	0.05
LPP	chr3:188590446	100	38.1	61.2255	47	11	G	A	0.08333
LTF	chr3:46501213	100	26.8	63.4655	58	11	C	T	0.2722
FGFR3	chr4:1803824	100	23.5	54.2784	51	11	G	C	0.07778
SYNE1	chr6:152529260	100	23.7	59.975	36	11	A	G	0.1167
SYNE1	chr6:152658142	100	19.8	69.642	69	11	C	T	0.1611
RPS6KA2	chr6:166862233	100	17.9	56.0357	42	11	C	T	0.1889
HSP90AB1	chr6:44217374	100	24.1	63.7441	59	11	G	T	0.1056
DST	chr6:56374754	100	20.4	64.1265	34	11	A	C	0.02222
DST	chr6:56437902	100	28.6	60.6667	36	11	T	C	0.09444
BAI3	chr6:69772817	100	35.6	69.4857	28	11	G	C	0.06111
EPHA7	chr6:94124530	100	22.5	64.0103	29	11	A	C	0.04444
CARD11	chr7:2952886	100	36.6	65.1833	54	11	T	C	0.1722
RECQL4	chr8:145737286	100	28.3	63.4368	38	11	A	G	0.07778
RECQL4	chr8:145737514	100	34.5	65.0878	41	11	A	G	0.02778
RECQL4	chr8:145742879	100	28.6	63.0185	54	11	C	T	0.07778
NOTCH1	chr9:139405261	100	29	66.7591	44	11	T	C	0.02222
SYK	chr9:93606309	100	38.8	58.9225	40	11	A	G	0.2
PTCH1	chr9:98229389	100	31.9	62.9344	32	11	G	C	0.1333
FAM123B	chrX:63413032	100	40.2	81.3714	21	11	A	G	0.024
ERBB3	chr12:56493822	100	20.8	59.3595	37	10	C	A	0.09444				1
ALK	chr2:29449819	100	28.6	57.1392	51	10	T	C	0.2				1
FLT4	chr5:180043388	100	25.9	60.7132	53	10	A	G	0.3				1
BRAF	chr7:140449150	100	33	66.4308	26	10	C	T	0.1	0		1	1
CARD11	chr7:2946461	100	27.4	59.2705	44	10	C	T	0.1	0		1	1
JAK2	chr9:5081780	99.5	19.4	62.2222	72	10	A	G	0.2778	0		1	1
NOTCH2	chr1:120480394	100	45.3	96.1019	54	10	C	T	0.2389
PDE4DIP	chr1:144916676	56.6	17	36.9328	67	10	T	C	0.3
PDE4DIP	chr1:144922523	57	16.2	37.5806	62	10	T	C	0.2056
PDE4DIP	chr1:144930571	58.1	31.1	47.6261	88	10	A	C	0.4222
PLEKHG5	chr1:6529443	100	29.6	62.1818	33	10	G	A	0.05
BCL10	chr1:85742012	100	23.4	57.5089	45	10	C	G	0.03889
SUFU	chr10:104268877	100	41.7	72.45	18	10	C	G	0.03889
FLT3	chr13:28623699	100	22.7	58.5953	43	10	T	G	0.2222
FLT3	chr13:28623759	100	22.5	57.8929	42	10	T	C	0.1833
THBS1	chr15:39876412	100	26	59.827	37	10	T	C	0.1722
BLM	chr15:91358272	100	39.4	77.0225	40	10	GAA	-	0.1167
IGF1R	chr15:99251356	100	40.8	62.1047	43	10	T	C	0.09444
IGF1R	chr15:99467943	100	28.6	62.2452	31	10	-	GT	0.1167
ERCC4	chr16:14029033	100	22.5	57.4538	39	10	A	G	0.1167
MMP2	chr16:55519535	100	25	60.4725	40	10	C	G	0.07222
FANCA	chr16:89866043	100	36.4	62.5	45	10	C	T	0.08333
ITGB3	chr17:45369789	100	22.6	60.1786	42	10	A	G	0.07222
NLRP1	chr17:5436263	100	18.5	59.6395	43	10	T	C	0.03889
DCC	chr18:50917982	100	18.9	63.4594	32	10	T	C	0.02778
SF3B1	chr2:198265171	100	5.9	56.1026	38	10	-	T	0.1278
FN1	chr2:216232556	100	37.6	64.3	32	10	T	C	0.1333
ASXL1	chr20:31025163	100	33.6	62.4568	44	10	G	A	0.1778
ASXL1	chr20:31025231	100	31.8	62.2767	43	10	C	T	0.1778
ITGB2	chr21:46321659	100	36.4	57.2414	29	10	A	C	0.07778
BCR	chr22:23657735	100	12	58.98	40	10	A	G	0.09444
PDGFB	chr22:39636930	100	36.9	80.7588	34	10	G	A	0.02778
CRBN	chr3:3192525	100	11.4	76.7171	76	10	TAAC	-	0.3278
PBRM1	chr3:52584787	100	28	61.0578	45	10	C	T	0.1111
PBRM1	chr3:52643307	100	30	65.7579	57	10	G	A	0.1
EPHA3	chr3:89521693	100	14.1	64.3269	26	10	C	T	0.05
SYNE1	chr6:152722228	100	27.5	66.8929	28	10	G	A	0.02222
IGF2R	chr6:160453978	100	27.9	59.4689	45	10	G	A	0.1889
IGF2R	chr6:160464289	100	23.4	57.0634	41	10	A	G	0.09444
NOTCH4	chr6:32190390	100	31.5	58.4707	41	10	G	T	0.1889
BAI3	chr6:70064187	100	24.1	62.3704	27	10	A	G	0.06111
POT1	chr7:124469267	100	20.8	61.5893	28	10	T	A	0.1167
ETV1	chr7:13978809	100	29.6	59.2333	45	10	C	T	0.25
MLL3	chr7:151879244	100	100	100	10	10	-	T	0.04444
CSMD3	chr8:113308243	100	33	69.1686	51	10	G	A	0.1444
NBN	chr8:90958422	100	24.7	62.3725	51	10	C	T	0.1722
MAGEA1	chrX:152482917	100	34.1	80.4048	21	10	C	T	0.056
MLH1	chr3:37053568	100	27.1	63.855	40	9	G	A	0.09444	1	1	1	1
DAXX	chr6:33287183	99.8	29.8	59.0857	28	9	C	T	0.1167				1
PDE4DIP	chr1:144852315	100	32	64.25	28	9	T	C	0.04444
PDE4DIP	chr1:145075854	56	17.2	42.6528	89	9	C	G	0.3444
ITGA10	chr1:145530254	100	32	54.5093	43	9	T	C	0.1444
TCF7L2	chr10:114849353	100	24.1	65.5677	31	9	T	C	0.1167
RET	chr10:43615633	100	22.7	63.0618	34	9	G	C	0.1556
DDB2	chr11:47260319	100	35.8	53.486	43	9	G	A	0.1722
ADAMTS20	chr12:43769276	100	22.3	58.5886	44	9	C	T	0.1611
FLT3	chr13:28592546	100	28.7	56.1462	39	9	C	T	0.1778
FLT3	chr13:28609825	100	16.3	65.809	67	9	G	A	0.2611
NIN	chr14:51224658	99.8	27.9	60.0761	46	9	A	T	0.2
THBS1	chr15:39879717	100	31.6	57.9091	33	9	A	G	0.1111
MYH11	chr16:15850204	100	30.2	55.4375	40	9	G	A	0.2278
CDH11	chr16:65022114	100	35.5	61.5714	42	9	T	C	0.1278
FANCA	chr16:89874628	100	33.3	64.687	23	9	T	C	0.04444
TP53	chr17:7579472	100	12.7	70.9094	53	9	C	G	0.07778
DCC	chr18:50432602	100	19.1	68.1339	59	9	G	C	0.3333
SMARCA4	chr19:11170839	100	30.1	60.2698	43	9	C	T	0.1444
AFF3	chr2:100218080	100	31.8	61.6651	43	9	A	G	0.2056
LRP1B	chr2:142888376	100	27.3	67.2477	44	9	C	G	0.01111
ERBB4	chr2:212286934	100	34.7	63.8138	29	9	T	A	0.05
AURKA	chr20:54959296	100	24.8	57.8143	35	9	C	G	0.2
GNAS	chr20:57478939	100	28.6	84.92	15	9	A	G	0.03333
CYP2D6	chr22:42526561	100	24.1	64.7393	28	9	TC	GG	0.005556
EPHB1	chr3:134898742	100	31.9	54.9079	38	9	T	C	0.01667
TNK2	chr3:195595054	100	28.2	49.876	25	9	T	C	0.04444
LTF	chr3:46501268	100	14.1	53.2897	39	9	T	C	0.08889
PBRM1	chr3:52584715	100	28.7	58.2259	27	9	G	A	0.06667
FGFR3	chr4:1803704	100	18.7	58.0682	44	9	C	T	0.08333
NSD1	chr5:176721272	100	35.9	63.2	25	9	C	G	0.07222
ROS1	chr6:117714346	100	25.4	68.4257	35	9	G	C	0.08333
SYNE1	chr6:152694184	100	18.3	62.6551	49	9	C	T	0.1
NOTCH4	chr6:32188383	100	22.6	55.7167	48	9	C	T	0.1444
NOTCH4	chr6:32188603	100	31.8	57.822	41	9	T	C	0.1389
PKHD1	chr6:51947237	100	27	55.7021	48	9	A	G	0.2167
ICK	chr6:52878637	100	22.2	56.7382	34	9	C	T	0.08333
TRIM24	chr7:138268563	100	35.3	65.5345	29	9	G	A	0.01111
NUP214	chr9:134015899	100	37.4	66.0952	21	9	G	C	0.06111
BRD3	chr9:136907108	100	34.4	68.6103	29	9	A	G	0.02222
PAX5	chr9:37020622	100	25.4	57.4969	32	9	C	A	0.1167
PTPRD	chr9:8521244	100	19.1	61.6136	22	9	T	C	0.1222
KRAS	chr12:25362777	100	19.3	57.8216	37	8	G	A	0.1667	1	1	1	1
ERBB3	chr12:56494991	100	20.8	59.2375	40	8	A	G	0.1444				1
ALK	chr2:29445458	100	35.5	53.4207	29	8	T	G	0.1278				1
PRDM1	chr6:106547372	100	42.3	64.9739	23	8	G	C	0.06667		1		1
NOTCH4	chr6:32188297	100	24.8	55.9634	41	8	C	G	0.1944				1
CSMD3	chr8:113364696	100	44	60.875	24	8	G	A	0.1056		1		1
CSMD3	chr8:114186003	100	17.8	56.375	44	8	C	T	0.2056		1		1
PDE4DIP	chr1:144854497	87.9	17.2	46.9364	88	8	G	A	0.4
PDE4DIP	chr1:144866643	63.7	22.1	40.4459	85	8	A	G	0.4389
PDE4DIP	chr1:144994658	63	17.9	40.6333	78	8	A	C	0.2722
PDE4DIP	chr1:145039562	53.9	30.6	44.0074	54	8	T	C	0.2444
NTRK1	chr1:156846233	100	25.7	59.7375	24	8	A	G	0.05556
PLEKHG5	chr1:6530435	100	26.4	54.9366	41	8	G	A	0.1111
NCOA4	chr10:51568378	100	34.2	58.16	40	8	G	T	0.08889
FANCF	chr11:22647366	100	27.3	59.3906	32	8	A	G	0.04444
WT1	chr11:32449417	100	22.7	57.2967	30	8	G	C	0.07778
CCND1	chr11:69466115	100	20.2	68.9692	26	8	A	C	0.01111
CCND2	chr12:4388084	100	17.5	64.9712	52	8	G	C	0.2278
TSHR	chr14:81422257	100	23.6	53.9056	18	8	C	G	0.02778
IGF1R	chr15:99473606	100	21.5	55.7636	33	8	G	A	0.1278
TSC2	chr16:2129453	100	96.2	99.5778	9	8	T	-	0.02222
COL1A1	chr17:48275489	100	22	59.9511	45	8	G	A	0.1444
CCNE1	chr19:30314666	100	27	57.0486	37	8	T	C	0.1111
ERCC1	chr19:45923653	100	35	61.3917	48	8	G	A	0.1889
ERCC1	chr19:45924362	100	43.1	60.7516	31	8	C	G	0.1667
PAX8	chr2:113999736	100	30.7	65.6	47	8	T	G	0.005556
ERBB4	chr2:212251864	100	22.2	59.3564	39	8	C	T	0.1444
FN1	chr2:216274854	100	19.4	51.8703	64	8	-	AC	0.02778
PAX3	chr2:223065870	100	23.1	64.1826	23	8	G	C	0.01111
MSH6	chr2:48032875	100	28.6	70.261	59	8	-	CTAT	0.1722
PTPRT	chr20:40714479	100	29.2	60.9105	38	8	A	G	0.15
CYP2D6	chr22:42526571	100	24.1	61.7724	29	8	G	C	0.005556
CYP2D6	chr22:42526573	100	24.1	61.6552	29	8	G	T	0.005556
CYP2D6	chr22:42526580	100	24.1	61.8241	29	8	C	G	0.005556
LTF	chr3:46491267	100	24.4	58.4974	39	8	A	G	0.1
CTNNA1	chr5:138221989	100	19.3	63.9727	33	8	C	G	0.07222
SYNE1	chr6:152466582	100	33.3	64.9556	36	8	G	A	0.05556
SYNE1	chr6:152629586	100	38.2	57.2154	26	8	A	G	0.08889
SYNE1	chr6:152671475	99.6	18.3	63.9649	57	8	C	A	0.25
PKHD1	chr6:51938242	100	22.5	58.76	30	8	G	A	0.1167
DST	chr6:56350339	100	31.8	59.3645	31	8	A	T	0.09444
TRRAP	chr7:98602990	100	29.4	56.8929	28	8	C	G	0.08889
CSMD3	chr8:114388945	100	17.5	56.9543	35	8	A	G	0.1222
NBN	chr8:90995019	100	17.6	61.0432	37	8	T	C	0.08889
BTK	chrX:100615478	100	42.6	78.3778	18	8	T	C	0.04
MAGEA1	chrX:152482198	100	47.1	81.8769	13	8	A	G	0.016
HIF1A	chr14:62207557	100	23.2	52.5244	41	7	T	C	0.1778		1		1
MSH6	chr2:48023115	100	39	61.1455	22	7	C	T	0.08333	0		1	1
PIK3R1	chr5:67588148	100	35.2	50.544	25	7	A	G	0.09444		1		1
MET	chr7:116397572	100	39.8	54.1429	21	7	G	A	0.05556				1
EGFR	chr7:55229255	99.8	30.1	52.9207	29	7	A	G	0.1167	0		1	1
ABL1	chr9:133755528	100	34.1	60.4769	26	7	G	A	0.06667	0		1	1
RNASEL	chr1:182554557	100	20	52.4679	28	7	T	C	0.02222
PTGS2	chr1:186648197	100	33.7	62.3053	19	7	G	C	0.09444
PIK3CD	chr1:9784423	100	28.2	53.669	29	7	T	C	0.1111
WT1	chr11:32456694	100	25.6	65.1865	37	7	A	C	0.08333
NUP98	chr11:3714489	100	31.5	58.7368	19	7	T	C	0.05556
ERCC5	chr13:103524762	100	33.2	63.5172	29	7	T	C	0.1
TSHR	chr14:81562998	99.7	19	53.5083	36	7	C	T	0.1556
THBS1	chr15:39880358	100	27.7	59.4143	35	7	T	C	0.03333
FANCA	chr16:89845194	100	32.8	62.6613	31	7	G	A	0.1
DCC	chr18:50936994	100	17.3	57.7519	54	7	C	T	0.07778
AXL	chr19:41762525	100	35.8	54.9361	36	7	G	A	0.1056
MARK4	chr19:45769575	100	36	53.805	20	7	A	G	0.03889
LRP1B	chr2:141474403	100	38	92.25	8	7	A	-	0.01111
FN1	chr2:216298084	100	23.5	51.0919	37	7	A	G	0.1167
STK36	chr2:219562675	100	27.8	55.4022	46	7	A	G	0.1444
ALK	chr2:29416615	60.8	31	47.2903	31	7	A	G	0.1333
MSH6	chr2:48030838	100	20.2	58.7562	32	7	T	A	0.08333
ITGB2	chr21:46320313	100	23.5	59.9433	30	7	T	C	0.1
SMARCB1	chr22:24145675	100	27.6	84.5846	13	7	C	G	0.005556
MYH9	chr22:36684980	99.8	31.7	51.1	26	7	A	G	0.1111
CYP2D6	chr22:42526549	100	21.7	61.1103	29	7	T	C	0.005556
CYP2D6	chr22:42526567	100	24.1	61.2207	29	7	A	G	0.005556
ITGA9	chr3:37523079	100	28.4	52.8417	24	7	A	G	0.05
WHSC1	chr4:1976481	100	95.7	99.0182	11	7	G	T	0.04444
AFF1	chr4:88029482	100	19.7	54.9871	31	7	G	C	0.03333
PDGFRB	chr5:149497228	99.7	38.6	59.1682	22	7	A	G	0.1167
FGFR4	chr5:176520243	100	19.4	58.6327	52	7	A	G	0.04444
LIFR	chr5:38504303	100	33.8	60.7577	26	7	T	A	0.03889
PIK3R1	chr5:67569746	100	29	58.1294	34	7	A	G	0.1778
SYNE1	chr6:152629617	100	16.5	56.0613	31	7	T	C	0.1333
SYNE1	chr6:152708310	100	37.7	59.9219	32	7	A	G	0.05556
NOTCH4	chr6:32188640	100	31.6	57.6122	41	7	C	T	0.1389
NOTCH4	chr6:32188642	100	31.6	57.5341	41	7	C	T	0.1389
HSP90AB1	chr6:44221142	100	26.4	58.7381	21	7	T	C	0.08333
DST	chr6:56420538	100	24.2	60.5824	34	7	T	C	0.1056
BAI3	chr6:69772809	100	34.2	59.1684	19	7	C	T	0.02222
GRM8	chr7:126410171	100	21.1	66.3636	33	7	C	G	0.1167
SAMD9	chr7:92734983	100	23.5	58.4125	24	7	G	A	0.06667
CSMD3	chr8:113237045	99.8	17.5	55.96	30	7	T	C	0.1722
RECQL4	chr8:145741765	100	29.5	64.6903	31	7	A	G	0.07778
NBN	chr8:90970862	100	38.1	59.9679	28	7	T	G	0.07778
PTPRD	chr9:8319806	100	37.1	56.7222	18	7	T	C	0.05
SYK	chr9:93639846	100	38.8	63.7813	16	7	G	C	0.06111
PTCH1	chr9:98209594	98.1	17.8	61.9298	57	7	A	G	0.2167
MAGEA1	chrX:152483088	100	41.5	81.5231	13	7	C	G	0.008
HRAS	chr11:534242	98.6	33.3	55.4256	39	6	G	A	0.1722	0		1	1
NIN	chr14:51224417	100	40.6	59.1318	22	6	C	G	0.1167				1
CDH1	chr16:68771372	100	32.8	83.7379	58	6	T	C	0.02222	0		1	1
MAP2K2	chr19:4102449	100	22.4	60.0353	34	6	A	G	0.05556				1
CIC	chr19:42795554	100	30.8	54.1368	38	6	C	T	0.01111	0		1	1
GATA2	chr3:128204951	100	24.8	61.5176	34	6	T	C	0.02778	1	1	1	1
IL6ST	chr5:55264153	99.9	28.6	60.937	27	6	G	C	0.1				1
PIK3CG	chr7:106509331	100	33.6	61.2448	29	6	A	C	0.1222		1		1
CARD11	chr7:2957005	100	41	58.0381	21	6	C	T	0.1056				1
NOTCH1	chr9:139407932	100	35.7	63.1867	30	6	G	A	0.1333	0		1	1
PDE4DIP	chr1:144857068	69.2	31.5	47.5306	62	6	T	A	0.1556
PDE4DIP	chr1:144874760	54.8	23.3	42.9115	87	6	C	T	0.4056
PDE4DIP	chr1:144882912	56.2	22.1	38.7898	49	6	T	G	0.1667
PDE4DIP	chr1:144919009	62.3	20.1	45.8375	40	6	-	C	0.2
PDE4DIP	chr1:145075683	84.6	29.5	49.182	89	6	T	C	0.4722
ITGA10	chr1:145542281	100	22.3	56.5	25	6	A	G	0.05
TPR	chr1:186316488	100	46.4	64.8214	14	6	T	C	0.01111
TPR	chr1:186319580	100	39	61.2353	17	6	A	C	0.05
PIK3C2B	chr1:204400783	99	29.8	53.6259	27	6	G	A	0.1444
IKBKE	chr1:206669465	100	31.2	55.7731	26	6	T	C	0.07778
PARP1	chr1:226567008	100	39	54.8643	28	6	G	C	0.1222
PARP1	chr1:226573364	100	31.6	63.8444	18	6	G	A	0.1111
PARP1	chr1:226580021	100	29.8	52.9778	27	6	T	G	0.08889
MTR	chr1:236978993	100	7.1	58.0822	45	6	TCTG	-	0.2111
MTR	chr1:237048500	99.8	32.5	54.69	30	6	G	A	0.08333
PLEKHG5	chr1:6531589	100	17.3	60.5857	28	6	T	C	0.09444
DPYD	chr1:98165091	100	28.2	58.0304	23	6	C	T	0.07222
NFKB2	chr10:104157711	100	28.6	57.5964	28	6	G	T	0.09444
RET	chr10:43600689	100	27	57.6261	23	6	G	A	0.03889
RET	chr10:43610119	100	27.9	62.9783	23	6	A	G	0.01111
GUCY1A2	chr11:106579204	100	19.5	59.1932	44	6	A	C	0.1556
EP400	chr12:132498260	100	40.6	55.5385	26	6	C	T	0.07778
ADAMTS20	chr12:43860526	100	29.1	58.7257	35	6	G	A	0.03333
BUB1B	chr15:40491952	99.4	18.9	58.5926	27	6	G	A	0.07778
PML	chr15:74328206	100	26.9	53.07	30	6	C	G	0.02778
IGF1R	chr15:99500256	100	27.3	68.5429	21	6	A	G	0.005556
MYH11	chr16:15839034	100	35.3	61.4435	23	6	A	G	0.05
TSC2	chr16:2138422	100	34.3	63.2875	32	6	G	C	0.01667
PALB2	chr16:23619235	100	29.1	51.5062	16	6	C	A	0.07778
MMP2	chr16:55525913	100	33.3	84.2975	40	6	C	G	0.01111
CDH11	chr16:65015908	100	36.4	60.8	24	6	G	C	0.08333
FANCA	chr16:89858505	99.8	19.8	55.4529	17	6	C	T	0.1
NF1	chr17:29553485	100	34.8	61.256	25	6	A	G	0.1
NF1	chr17:29559932	100	36.9	68.3261	23	6	A	C	0.1333
ETV4	chr17:41622740	100	22.2	54.4286	35	6	T	G	0.05
NLRP1	chr17:5424129	100	33.3	66.8458	24	6	G	C	0.04444
FANCJ	chr17:59763114	100	30	64.452	25	6	T	A	0.01667
PRKAR1A	chr17:66519858	100	22.7	56.2737	19	6	T	-	0.06667
SEP9	chr17:75398498	100	34.3	58.624	25	6	T	C	0.01667
RNF213	chr17:78324048	100	26.4	63.1658	38	6	A	T	0.1278
STK36	chr2:219545309	100	22.9	62.9139	36	6	C	T	0.1278
DNMT3A	chr2:25463483	100	37.1	65.0281	32	6	A	G	0.05556
RUNX1	chr21:36164405	100	22.1	62.7548	31	6	T	G	0.07222
EP300	chr22:41542838	100	55.8	88	11	6	-	T	0.03333
XPC	chr3:14188762	100	20.7	51.5686	35	6	C	G	0.07222
LTF	chr3:46491290	100	26.1	54.5429	28	6	A	G	0.05556
FGFR3	chr4:1803307	100	26.4	55.9242	33	6	C	T	0.02222
WHSC1	chr4:1976483	100	95.7	98.9818	11	6	G	C	0.03333
NSD1	chr5:176637149	100	40.1	61.3211	19	6	A	G	0.08889
LIFR	chr5:38527308	100	43.5	58.5267	15	6	A	G	0.02778
TNFAIP3	chr6:138197329	100	18.2	53.7103	29	6	T	C	0.1444
SYNE1	chr6:152497500	100	34	56.7174	23	6	T	C	0.08889
SYNE1	chr6:152558112	100	33.9	84.65	8	6	A	-	0.02778
SYNE1	chr6:152630946	100	22.2	50.7581	31	6	T	C	0.06111
SYNE1	chr6:152771849	53.5	44.9	49.3417	12	6	A	G	0.06111
DEK	chr6:18264210	100	19.4	58.6889	27	6	A	G	0.02778
IRF4	chr6:398965	100	29.5	58.8333	15	6	T	C	0.07778
FOXP4	chr6:41533579	100	22.4	55.4222	27	6	A	C	0.02222
PKHD1	chr6:51640751	100	31.7	58.6553	38	6	G	C	0.1056
PKHD1	chr6:51923409	100	19	56.8871	31	6	T	A	0.03333
PIK3CG	chr7:106524689	100	37.3	59.1333	27	6	T	C	0.09444
MLL3	chr7:151873853	99.7	19.8	54.5694	36	6	T	C	0.1611
IKZF1	chr7:50467767	99.5	31.7	50.063	27	6	A	C	0.02222
AKAP9	chr7:91667692	100	29.3	68.1429	21	6	G	T	0.01667
TRRAP	chr7:98556962	100	38	59.2333	15	6	T	C	0.05
CSMD3	chr8:113299275	100	28.8	59.3963	27	6	G	A	0.02778
WRN	chr8:30938704	100	19.1	50.2357	28	6	A	G	0.1278
KAT6A	chr8:41794934	99.8	24.8	51.4719	32	6	T	C	0.1667
NUP214	chr9:134001158	100	44.4	61.9583	24	6	G	C	0.07222
TSC1	chr9:135786904	61.3	44.1	53.0077	13	6	G	A	0.03889
SYK	chr9:93640131	100	15.8	51.0577	26	6	T	C	0.08889
NOTCH2	chr1:120458004	63.9	32.3	49.6308	13	5	T	A	0.03889				1
AKT1	chr14:105239894	100	20.7	56.5893	28	5	T	C	0.08333		1		1
KEAP1	chr19:10610236	99.7	48.1	57.6778	9	5	G	A	0.05				1
IL7R	chr5:35874575	99.2	0.7	49.6778	18	5	T	C	0.01111	0		1	1
BRD3	chr9:136907005	99.2	35.7	63.8581	43	5	A	G	0.1167	0		1	1
PAX5	chr9:36846910	100	23.1	56.9722	18	5	T	C	0.02222				1
SYK	chr9:93639973	99.7	34.4	53.9583	24	5	C	G	0.05556	0		1	1
PDE4DIP	chr1:144874815	60	17.8	33.7214	42	5	C	T	0.1111
PDE4DIP	chr1:144922171	76.9	42	55.692	88	5	T	C	0.3
ITGA10	chr1:145536082	100	24.1	62.9656	32	5	A	G	0.1389
MUC1	chr1:155160698	99.7	31.2	53.0136	22	5	T	A	0.07778
PARP1	chr1:226589958	100	26.1	52.5	18	5	A	G	0.06111
FH	chr1:241667523	100	45.6	63.455	20	5	T	C	0.1167
FH	chr1:241677035	99.1	39.2	60.06	20	5	A	T	0.1111
DPYD	chr1:97770920	99.9	40.1	60.25	22	5	T	C	0.06111
DPYD	chr1:97771947	100	49.2	75.4235	17	5	A	C	0.05
KAT6B	chr10:76781906	99.7	32	57.33	40	5	-	GAA	0.15
CYP2C19	chr10:96535124	99.9	27.7	54.3812	16	5	G	A	0.02778
GUCY1A2	chr11:106849400	100	30.2	65.2333	15	5	A	G	0.005556
NUP98	chr11:3723781	100	48.1	56.7385	13	5	C	G	0.03889
NUP98	chr11:3746465	100	32.4	59.0462	26	5	G	C	0.05
NUMA1	chr11:71717106	99.3	31.1	52.7778	9	5	A	G	0.03889
MRE11A	chr11:94200962	100	36.5	58.4667	21	5	G	A	0.05556
EP400	chr12:132508389	99.7	40.9	53.1929	28	5	G	A	0.1444
MLL2	chr12:49416047	100	36.3	61.7381	21	5	-	C	0.03333
MLL2	chr12:49425978	100	21.5	49.5917	36	5	C	T	0.02778
CDK4	chr12:58144665	100	44.5	68.6591	22	5	T	C	0.07778
ING4	chr12:6762026	100	85.7	95.7255	47	5	C	T	0.1111
BCL2L2	chr14:23777099	100	34.8	57.1684	19	5	A	G	0.01111
NIN	chr14:51206145	100	35.8	55.275	16	5	T	A	0.07778
THBS1	chr15:39879517	100	31.1	64.4409	22	5	T	C	0.02778
THBS1	chr15:39880822	100	36.8	59.6684	38	5	G	A	0.1667
BUB1B	chr15:40462780	99.2	29.3	54.3409	22	5	A	G	0.05
PML	chr15:74328141	100	30.4	62.8421	38	5	T	G	0.02778
MYH11	chr16:15838940	100	28.6	64.76	35	5	C	G	0.03333
MYH11	chr16:15872609	59.8	25.5	48.0885	26	5	G	A	0.06667
TSC2	chr16:2105335	100	36.6	55.7727	22	5	G	C	0.1056
TSC2	chr16:2114407	99.8	21.8	49.8042	24	5	T	C	0.1111
FANCA	chr16:89831510	100	27.5	62.2739	23	5	A	C	0.09444
FLCN	chr17:17118442	99.2	25.2	53.2758	33	5	C	T	0.02222
ITGB3	chr17:45377825	100	21.4	48.4467	30	5	C	T	0.08333
COL1A1	chr17:48273903	100	17.8	56.8029	34	5	C	A	0.1
DCC	chr18:50278686	100	18.9	61.452	25	5	A	G	0.01111
DCC	chr18:50831933	100	32.6	53.8429	28	5	T	C	0.06667
CDH20	chr18:59203707	99.9	18.5	53.8356	45	5	A	G	0.1556
STK11	chr19:1220321	100	37.1	62.9759	29	5	C	T	0.03333
MARK4	chr19:45797593	100	45.8	58.725	16	5	C	T	0.03889
GREB1	chr2:11751005	100	92	97.8778	9	5	T	G	0.01111
LRP1B	chr2:141027926	99.5	31.3	55.0588	17	5	G	A	0.06111
LRP1B	chr2:141771058	100	26.5	68.2767	30	5	A	T	0.05556
LRP1B	chr2:142012027	100	30	57.656	25	5	T	G	0.03333
LRP1B	chr2:142012036	100	44.2	57.4533	15	5	G	T	0.01111
FN1	chr2:216288841	100	29.1	58.2357	28	5	C	T	0.005556
DNMT3A	chr2:25469502	58	39.7	50.0773	22	5	T	C	0.07778
TCF7L1	chr2:85536129	100	39.9	64.75	14	5	-	TCTT	0.04444
ITGB2	chr21:46321677	83	41.4	53.4923	13	5	A	G	0.02778
SMARCB1	chr22:24167513	100	0.1	57.2806	31	5	A	G	0.05556
MYH9	chr22:36691691	99.6	29.6	53.0296	27	5	C	T	0.05556
EP300	chr22:41569609	96.8	23.5	60.7667	36	5	T	C	0.1722
CYP2D6	chr22:42522613	100	26.1	59.6154	26	5	C	G	0.01667
XPC	chr3:14190237	100	17.5	44.8682	44	5	G	T	0.08333
XPC	chr3:14190268	100	22.3	52.0971	35	5	C	G	0.05
ITGA9	chr3:37695192	100	28.4	59.9059	34	5	A	G	0.07778
NSD1	chr5:176639105	100	19.3	56.9969	32	5	C	T	0.1889
FLT4	chr5:180055864	100	23.9	70.0167	66	5	A	G	0.1278
MTRR	chr5:7875307	100	27	58.05	26	5	G	C	0.1
MTRR	chr5:7878179	100	32.4	72.6583	12	5	T	C	0.04444
SGK1	chr6:134493397	100	27.3	58.6267	15	5	A	G	0.06111
SYNE1	chr6:152651759	100	39.2	55.4833	12	5	G	C	0.03333
IGF2R	chr6:160494521	100	29.1	63.2421	19	5	T	C	0.005556
NOTCH4	chr6:32190484	100	31.6	52.8636	11	5	A	G	0.01667
PKHD1	chr6:51524403	100	32	65.25	12	5	A	G	0.005556
PKHD1	chr6:51640787	100	27	58.1875	16	5	G	A	0.05
PKHD1	chr6:51947257	100	30	54.1281	32	5	A	G	0.1222
EPHB4	chr7:100410597	99.5	27	59.5167	30	5	A	G	0.1556
PIK3CG	chr7:106513011	99.6	27.8	52.4364	22	5	T	C	0.03333
MET	chr7:116339672	100	28.1	54.5714	28	5	T	C	0.1444
CARD11	chr7:2963786	99.1	33	55.272	25	5	T	C	0.05
SAMD9	chr7:92734451	99.9	36.4	59.6833	30	5	G	A	0.1389
UBR5	chr8:103289349	100	50.3	86.975	8	5	-	T	0.01111
WRN	chr8:30977717	100	28.3	59.5321	28	5	C	T	0.06111
BRD3	chr9:136913123	99.4	28.6	60.1423	26	5	G	C	0.01667
NOTCH1	chr9:139413908	98.8	38.5	56.2667	24	5	T	C	0.07222
JAK2	chr9:5090641	100	17.5	54.2361	36	5	A	G	0.07778
SYK	chr9:93637015	99.4	21	53.412	25	5	T	C	0.06667
SYK	chr9:93640120	99.7	17.5	50.9769	26	5	T	C	0.08889
USP9X	chrX:41043944	100	33.1	71.2179	28	5	C	T	0.008264
AR	chrX:66765627	100	27.6	69.6875	16	5	A	G	0.048
JAK1	chr1:65311262	100	36.2	56.0143	7	4	A	G	0.03333	0		1	1
TSC2	chr16:2105400	97.5	38.5	50.252	25	4	T	C	0.1056				1
CYLD	chr16:50827518	100	31.5	54.4105	19	4	T	C	0.02222				1
ALK	chr2:29416481	100	40.5	53.8045	22	4	C	T	0.02778		1		1
BCL6	chr3:187443314	99.8	28.2	56.6647	17	4	A	G	0.04444		1		1
LIFR	chr5:38486065	99.2	29.2	47.9952	21	4	T	C	0.02778	0		1	1
DAXX	chr6:33288271	99.2	30.4	53.5706	17	4	G	A	0.05556				1
EGFR	chr7:55268916	100	37.2	54.82	10	4	T	C	0.05556	1	1	1	1
TSC1	chr9:135772717	92.2	37.8	56.625	12	4	A	G	0.06111				1
TRIM33	chr1:114951390	100	29.5	57.7618	34	4	A	T	0.1556
NOTCH2	chr1:120469077	100	28.6	58.6158	19	4	C	T	0.02222
NOTCH2	chr1:120477998	100	31.1	58.4538	26	4	A	C	0.06667
PDE4DIP	chr1:144906508	99.2	44	55.7	16	4	T	C	0.08333
TPR	chr1:186321242	100	26.3	63.2067	15	4	T	C	0.03333
PARP1	chr1:226555302	100	29.2	53.7067	15	4	G	A	0.03889
MTR	chr1:237058744	100	34.1	54.1212	33	4	A	C	0.1556
MTR	chr1:237060850	56.7	44.9	50.12	10	4	C	T	0.03333
MUTYH	chr1:45795084	100	18.5	46.7	16	4	A	G	0.05556
PLEKHG5	chr1:6529183	100	16.2	59.2562	16	4	-	TCC	0.04444
PLEKHG5	chr1:6529807	100	18.5	59.9125	16	4	T	C	0.06111
PLEKHG5	chr1:6529823	100	22.2	60.325	16	4	C	G	0.05556
BCL10	chr1:85733374	57.8	29	46.2615	13	4	T	C	0.06111
DPYD	chr1:97981395	100	21.2	54.2704	27	4	C	T	0.1667
NFKB2	chr10:104160959	100	25	53.5087	23	4	T	C	0.005556
NFKB2	chr10:104161724	100	25	51.4739	23	4	G	A	0.01111
CYP2C19	chr10:96602622	100	20.3	54.1375	16	4	T	C	0.06111
WT1	chr11:32449486	100	27	58.1368	19	4	T	C	0.06667
WT1	chr11:32456298	100	30.6	55.6867	15	4	A	G	0.03889
NUP98	chr11:3733899	54.5	45.5	49.57	10	4	T	C	0.04444
NUP98	chr11:3740574	100	18.8	54.5273	22	4	T	C	0.05556
EXT2	chr11:44130665	66.3	27.1	50.9429	21	4	C	A	0.05556
EP400	chr12:132562126	100	29.8	53.4862	29	4	A	G	0.05
ADAMTS20	chr12:43769228	100	27.7	63.8621	29	4	C	A	0.01667
ADAMTS20	chr12:43840370	100	27.8	50.3577	26	4	A	G	0.05
MDM2	chr12:69202164	100	36.7	54.4737	19	4	G	A	0.02778
FLT3	chr13:28597449	100	32.4	60.4077	13	4	-	CT	0.02222
FLT1	chr13:28893642	100	20.5	50.7933	30	4	G	A	0.1611
BUB1B	chr15:40494960	99.6	32	60.314	43	4	C	A	0.1722
PALB2	chr16:23634293	61.9	21.5	46.075	12	4	T	C	0.03333
ITGB3	chr17:45360730	100	28.1	58.2682	22	4	C	T	0.1333
ITGB3	chr17:45364540	100	19.1	52.975	28	4	C	T	0.05
NLRP1	chr17:5445243	99.3	25.7	52.7929	14	4	A	G	0.03889
RNF213	chr17:78292945	100	29.1	58.8115	26	4	A	G	0.1
RNF213	chr17:78337584	100	20.5	51.4407	27	4	G	A	0.1
MBD1	chr18:47800179	100	23.1	63.6	23	4	C	G	0.05556
STK11	chr19:1222012	99.5	32.8	49.8158	19	4	C	G	0.05556
TCF3	chr19:1650134	100	30.8	57.7958	24	4	G	A	0.005556
JAK3	chr19:17952185	99.3	28.6	60.5656	32	4	T	G	0.02778
PIK3R2	chr19:18273013	100	36.5	53.9	8	4	A	G	0.03889
GNA11	chr19:3110349	100	20	51.9636	33	4	G	T	0.02222
PAX8	chr2:113999534	100	30.7	62.5842	19	4	C	G	0.06667
LRP1B	chr2:141202026	99.7	96.9	98.6857	7	4	CA	AT	0.07778
LRP1B	chr2:141260507	100	28.6	55.4526	19	4	C	T	0.01667
SF3B1	chr2:198264904	100	37.3	60.2467	30	4	-	AAT	0.07778
ALK	chr2:29446184	100	38.1	65.1138	29	4	G	C	0.09444
BCL11A	chr2:60679641	50.7	41.8	48.1833	6	4	A	G	0.03333
ITGB2	chr21:46327067	100	99.6	99.9	4	4	A	-	0.02222
ITGB2	chr21:46330628	100	35.7	61.1706	17	4	T	C	0.08333
CYP2D6	chr22:42526694	100	35.6	64.8409	22	4	A	G	0.04444
FANCD2	chr3:10091035	100	21.4	58.0727	22	4	C	T	0.08889
FANCD2	chr3:10133949	100	26	58.4333	21	4	G	A	0.08333
ITGA9	chr3:37670876	100	16	57.4238	21	4	C	G	0.1056
EPHA3	chr3:89480265	99.6	48.9	57.91	10	4	G	A	0.03333
EPHA3	chr3:89498428	100	42.7	61.5273	11	4	A	G	0.05556
RAD50	chr5:131972916	98.1	34.3	54.4875	16	4	G	A	0.05556
SDHA	chr5:233572	99.3	29.4	54.5636	11	4	G	A	0.03333
LIFR	chr5:38490271	99	38.5	53.7478	23	4	G	A	0.08333
MTRR	chr5:7885959	100	24	50.3042	24	4	G	A	0.03333
ROS1	chr6:117622184	99.8	28.1	56.375	20	4	C	G	0.04444
SYNE1	chr6:152570274	100	26.1	53.6762	21	4	G	A	0.005556
SYNE1	chr6:152660310	100	29.6	58.54	20	4	G	A	0.05
SYNE1	chr6:152712752	100	25.5	64.7667	15	4	T	C	0.005556
SYNE1	chr6:152777095	57.8	44.2	49.0833	12	4	C	A	0.05556
IGF2R	chr6:160448324	100	36.8	57.6714	21	4	G	C	0.03889
DEK	chr6:18258516	100	32.9	61.6972	36	4	A	G	0.06667
HSP90AB1	chr6:44221146	100	30.1	57.545	20	4	-	GAGTTTGT	0.07778
PKHD1	chr6:51921815	100	90	97.22	10	4	GCCTT	-	0.02222
BAI3	chr6:69758072	70	27.7	50.3357	14	4	T	A	0.03333
BAI3	chr6:70071173	99.8	16.3	55.4	44	4	A	G	0.1222
EPHB4	chr7:100424587	100	10.1	59.675	36	4	-	G	0.02778
POT1	chr7:124492038	100	33.9	65.715	20	4	C	T	0.05
GRM8	chr7:126544242	100	30.4	58.4476	21	4	C	T	0.005556
EZH2	chr7:148506396	100	44.1	68.9667	12	4	C	A	0.005556
SAMD9	chr7:92733766	100	22.7	51.6429	21	4	A	C	0.07222
CSMD3	chr8:113841971	100	45.5	74.8857	14	4	G	A	0.01111
WRN	chr8:31024654	100	24.8	57.0897	29	4	C	T	0.1611
ABL1	chr9:133760029	98.6	28.8	60.9542	24	4	G	C	0.04444
RALGDS	chr9:135978378	100	17.1	53.3786	14	4	C	T	0.06667
NOTCH1	chr9:139405584	98.8	37.2	55.5333	18	4	T	C	0.09444
TAF1L	chr9:32630472	99.6	35.9	55.0222	18	4	C	T	0.06111
PTPRD	chr9:8460647	100	82.5	94.825	12	4	-	A	0.01111
PTPRD	chr9:8518143	99.5	23.5	50.336	25	4	C	T	0.08889
TBX22	chrX:79283631	100	41.1	74.1833	6	4	-	C	0.008
JAK1	chr1:65335062	55.7	43.1	49.9	12	3	G	A	0.05556				1
ATM	chr11:108175462	100	0.1	30.95	20	3	A	G	0.05556	1	1	1	1
KRAS	chr12:25362854	100	40.7	53.92	15	3	T	C	0.06111	0			1
CDH1	chr16:68856088	100	38.7	53.8684	19	3	T	C	0.07778				1
RNF213	chr17:78355494	100	26.5	52.9778	9	3	G	C	0.02778		1		1
MSH2	chr2:47703500	100	0.1	57.4824	17	3	C	T	0.02222				1
MSH6	chr2:48018081	100	16.5	55.83	20	3	G	A	0.06111	0			1
FGFR3	chr4:1808286	100	38.5	84.2117	77	3	A	G	0.2778	1	1		1
PDGFRA	chr4:55152040	99	0.1	48.0222	18	3	T	C	0.03889	1	1	1	1
NSD1	chr5:176637240	100	16.3	67.32	5	3	T	G	0.005556				1
IL6ST	chr5:55251931	100	26.4	54.1	24	3	C	G	0.03889				1
ESR1	chr6:152420095	100	21.9	50.1529	17	3	A	G	0.01667	0		1	1
CSMD3	chr8:113516210	67.7	35.2	56.1786	14	3	-	A	0.03889	0		1	1
EXT1	chr8:118832020	100	34.8	57.8028	36	3	A	G	0.1889	0		1	1
BRD3	chr9:136915508	85.9	26.8	53.7333	18	3	T	C	0.06111				1
BCL9	chr1:147091972	99.5	39.1	60.1462	26	3	T	C	0.03333
DDR2	chr1:162737116	100	38.1	54.7917	24	3	G	C	0.005556
SDHB	chr1:17371221	70.7	37.5	48.9824	17	3	T	C	0.02222
ABL2	chr1:179112145	97.8	33.7	51.425	20	3	G	C	0.07778
TPR	chr1:186286782	100	45.1	59.05	10	3	G	A	0.01111
PTGS2	chr1:186645927	100	34.7	52.9643	14	3	T	C	0.005556
MDM4	chr1:204501383	62.5	33.3	45.83	10	3	T	C	0.02222
MARK1	chr1:220825543	100	30.9	54.59	20	3	C	T	0.005556
PARP1	chr1:226578047	99.2	33.2	53.2429	14	3	T	G	0.02222
MTR	chr1:237013551	100	35.5	56.425	12	3	A	T	0.01667
MTR	chr1:237013553	100	35.1	60.97	10	3	-	T	0.01667
PIK3CD	chr1:9781650	63.6	46.4	51.8857	7	3	T	C	0.02222
PIK3CD	chr1:9782556	100	30.9	68.1921	38	3	T	C	0.01111
FGFR2	chr10:123247644	59.6	25.2	46.4889	9	3	C	A	0.03889
TET1	chr10:70405237	99.8	37.5	51.2786	14	3	A	G	0.06111
FAS	chr10:90767640	100	40.4	55.0059	17	3	T	C	0.08333
CYP2C19	chr10:96522561	74.5	42	50.01	10	3	C	T	0.03889
GUCY1A2	chr11:106647138	100	35.1	59.7333	18	3	CTCAAACT	-	0.005556
SDHD	chr11:111957665	57	44.2	51.1286	7	3	A	G	0.01667
NUP98	chr11:3740588	100	25	52.6167	24	3	T	G	0.04444
HRAS	chr11:534197	99.7	48.8	59.7778	9	3	T	C	0.05
PTPN11	chr12:112915434	99.7	37.1	59.8667	15	3	T	C	0.05
HNF1A	chr12:121432117	100	20.1	49.6652	23	3	C	G	0.01667		1
HNF1A	chr12:121437114	98.3	37.5	51.6545	22	3	A	G	0.05
HCAR1	chr12:123214372	61.7	29.6	47.39	10	3	A	G	0.01111
EP400	chr12:132539451	62.5	42.4	48.3833	12	3	A	G	0.005556
ARID2	chr12:46211396	93.6	33.7	49.2938	16	3	C	T	0.05
IRS2	chr13:110435914	98.8	24.1	74.8433	67	3	A	G	0.3222
TSHR	chr14:81528412	99.8	33.7	52.0121	33	3	A	T	0.05
TRIP11	chr14:92505915	100	26	57.82	15	3	A	T	0.08333
THBS1	chr15:39887494	51	21.6	42.7857	14	3	ACTGAT	-	0.02778
BUB1B	chr15:40488851	100	34.1	55.7667	15	3	A	G	0.05556
BLM	chr15:91346923	98.2	20.8	47.2423	26	3	A	C	0.08333
MYH11	chr16:15917197	63.3	26.7	48.225	24	3	A	G	0.09444
TSC2	chr16:2110805	100	21.7	53.6933	15	3	A	G	0.03333
PALB2	chr16:23641461	100	21.2	46.1062	16	3	G	C	0.07222
PALB2	chr16:23646191	95	21.8	50.5818	22	3	C	T	0.04444
CREBBP	chr16:3828207	51	31.8	46.06	5	3	C	T	0.005556
CREBBP	chr16:3831187	100	45.7	60.0615	13	3	A	T	0.06667
CDH11	chr16:65022234	64.8	37.3	52.5125	16	3	T	C	0.07778
CDH11	chr16:65025718	100	21.3	51.1812	32	3	A	G	0.05556
FANCA	chr16:89809319	100	34.1	51.65	16	3	C	T	0.02778
FANCA	chr16:89836899	100	30.3	61.75	8	3	C	T	0.01111
FLCN	chr17:17127471	100	16	57.0822	45	3	A	G	0.1889
ITGB3	chr17:45331358	100	28	56.4125	16	3	G	C	0.02222
NLRP1	chr17:5418799	99.5	30.1	52.1824	17	3	A	G	0.08333
NLRP1	chr17:5424991	100	36.9	61.0933	15	3	A	G	0.02778
NLRP1	chr17:5440248	99.2	32.2	52.6857	14	3	C	T	0.06667
NLRP1	chr17:5445314	100	26	52.6714	14	3	A	G	0.03889
NLRP1	chr17:5487164	100	22.2	61.5167	18	3	G	C	0.01111
RNF213	chr17:78321157	99.8	28.3	50.595	20	3	C	T	0.04444
RNF213	chr17:78337058	100	15.6	48.3032	31	3	C	G	0.1111
MBD1	chr18:47793973	100	21.2	50.9313	16	3	A	G	0.01667
SMARCA4	chr19:11113651	100	25.5	52.0111	9	3	C	T	0.05
TCF3	chr19:1619350	100	30.2	55.98	25	3	T	C	0.005556
CRTC1	chr19:18876309	100	24.8	55.8533	30	3	G	A	0.08333
FZR1	chr19:3533274	100	36	62.0625	24	3	A	G	0.01111
ERCC1	chr19:45922323	70.9	26.2	48.6278	18	3	T	G	0.07222
AFF3	chr2:100210642	99.3	41.5	54.813	23	3	C	T	0.07778
AFF3	chr2:100623130	100	37.5	55.49	10	3	A	G	0.01667
PAX8	chr2:113994227	99.2	49.1	62.5	4	3	A	C	0.02778
LRP1B	chr2:141130548	68	35.4	49.5364	11	3	C	T	0.005556
LRP1B	chr2:141253408	98.9	38.3	56.7323	31	3	C	T	0.1056
LRP1B	chr2:141298682	100	35	65.7375	8	3	C	G	0.005556
LRP1B	chr2:141299317	96.5	27.3	60.1529	34	3	G	A	0.1111
NCOA1	chr2:24929851	99.2	33.3	57.4437	16	3	T	A	0.07222
NCOA1	chr2:24962252	100	34.2	55.119	21	3	A	G	0.05556
NCOA1	chr2:24980955	99.4	31.2	49.5111	9	3	G	A	0.03889
DNMT3A	chr2:25471170	100	44.6	56.4429	14	3	-	C	0.03333
ALK	chr2:29551161	100	37.2	54.0091	22	3	A	G	0.05
PTPRT	chr20:41101180	100	29.1	57.73	10	3	A	G	0.02222
AURKA	chr20:54961541	98.8	30.5	52.9167	24	3	T	A	0.05556
ITGB2	chr21:46320403	100	23.7	51.36	10	3	T	C	0.02222
MAPK1	chr22:22162126	62.5	24.8	47.8333	12	3	G	A	0.02778
MAPK1	chr22:22221530	99.4	31.2	60.3143	35	3	A	G	0.005556
BCR	chr22:23615801	100	23.6	50.05	28	3	G	A	0.06111
BCR	chr22:23656148	100	33.8	51.76	10	3	G	T	0.03889
SMARCB1	chr22:24158895	100	39.5	61.6294	17	3	G	A	0.02778
MYH9	chr22:36684354	100	34.3	59.1565	23	3	C	T	0.01667
MYH9	chr22:36690120	94.4	34.5	55.1833	12	3	C	T	0.03889
PPARG	chr3:12475557	99.7	24.3	48.6	11	3	T	C	0.02778
GATA2	chr3:128202760	99.9	25.6	66.5348	23	3	C	G	0.03889
XPC	chr3:14193889	100	24.5	50.7696	23	3	T	C	0.1167
XPC	chr3:14199887	63.4	28.1	48.3941	17	3	A	G	0.07778
BCL6	chr3:187446211	100	42.3	62.9071	14	3	T	C	0.03889
ITGA9	chr3:37778481	100	24.2	61.3	24	3	C	G	0.02222
LTF	chr3:46488854	100	40	55.7889	27	3	C	T	0.07222
TET2	chr4:106155751	100	28.4	47.9273	11	3	A	G	0.05556
APC	chr5:112043384	100	23.6	53.59	20	3	G	T	0.08889
RAD50	chr5:131915213	100	36	56.9636	22	3	A	G	0.09444
CSF1R	chr5:149450132	100	25	52.5476	21	3	C	T	0.1167
CSF1R	chr5:149456811	100	19.5	50	17	3	A	G	0.04444
NSD1	chr5:176637576	100	26.3	56.9286	21	3	C	T	0.03333
SDHA	chr5:228362	99.8	28.8	53.3533	15	3	C	T	0.06667
SDHA	chr5:231143	72.7	27.8	53.17	10	3	C	T	0.02778
SDHA	chr5:233517	99.9	29	55.4727	11	3	A	G	0.03333
SDHA	chr5:256472	99.7	21.5	53.7	15	3	A	G	0.06111
SDHA	chr5:256509	99	21.1	52.3667	12	3	A	G	0.05556
IL7R	chr5:35857207	100	45.8	88.8267	15	3	T	C	0.01111
MYB	chr6:135515448	98.2	39.3	57.5688	16	3	C	T	0.03889
TNFAIP3	chr6:138201240	100	49.4	66.8	3	3	C	A	0.01111
SYNE1	chr6:152470752	100	31.7	53.55	16	3	A	C	0.03333
SYNE1	chr6:152522926	100	17.8	48.7905	21	3	A	G	0.01111
SYNE1	chr6:152577752	99.3	29.6	54.2692	13	3	C	T	0.005556
SYNE1	chr6:152640110	57.8	23.1	47.2462	13	3	A	G	0.05556
SYNE1	chr6:152690559	99.6	23.5	54.91	20	3	A	G	0.02222
IGF2R	chr6:160453561	100	24	55.068	25	3	G	T	0.03333
POU5F1	chr6:31138107	100	20	50.3667	24	3	A	G	0.005556
NOTCH4	chr6:32188099	100	35.5	56.3176	17	3	T	C	0.03333
NOTCH4	chr6:32189032	99.5	44.2	68.5125	8	3	C	T	0.05556
HSP90AB1	chr6:44217910	58.3	48.4	51.5	6	3	G	A	0.02778
PKHD1	chr6:51484348	99.5	30.1	52.6667	21	3	A	G	0.08333
PKHD1	chr6:51732628	100	19	44.816	25	3	A	G	0.06111
PKHD1	chr6:51917968	100	32.2	53.0724	29	3	G	T	0.08333
ICK	chr6:52878654	56	22.2	47.04	10	3	T	C	0.02778
DST	chr6:56507489	100	48.2	59.0625	8	3	G	A	0.01667
PIK3CG	chr7:106523446	98.8	23.1	54.6773	22	3	G	A	0.1056
ETV1	chr7:13950838	99.5	33.5	56.0933	15	3	T	C	0.07222
BRAF	chr7:140500135	63.7	29	46.5067	15	3	T	C	0.06667
XRCC2	chr7:152346007	50	34.3	41.86	10	3	T	C	0.01111
CDK6	chr7:92244631	100	10.1	57.4286	21	3	-	ATACA	0.02222
UBR5	chr8:103316437	100	35.8	54.7167	18	3	A	G	0.06667
EXT1	chr8:118847782	99.4	34.1	64.9531	32	3	A	G	0.1111
RECQL4	chr8:145741142	99.6	30.2	51.705	20	3	A	T	0.04444
WRN	chr8:30946403	100	29.8	59.18	10	3	A	C	0.03333
WRN	chr8:31000243	99.5	21	65.8477	44	3	C	T	0.05
KAT6A	chr8:41805249	100	17.6	47.6429	21	3	T	C	0.04444
PRKDC	chr8:48689366	100	37.5	55.0231	13	3	T	C	0.03889
TLR4	chr9:120475602	65.2	36	48.2545	11	3	T	C	0.02222
PSIP1	chr9:15486870	80.7	39.9	54.8727	11	3	G	A	0.04444
TAF1L	chr9:32631369	100	40.6	52.5933	15	3	T	C	0.07222
PTPRD	chr9:8465598	100	36.1	57.164	25	3	G	A	0.03333
TET1	chr10:70332862	51	30.9	44.42	5	2	T	C	0.01111				1
ERBB3	chr12:56494998	100	37.3	56.8	8	2	T	A	0.02222		1		1
RB1	chr13:49051481	100	31.3	53.45	14	2	A	T	0.04444				1
MAP2K1	chr15:66782048	76	40	54.2875	8	2	T	C	0.03333				1
TP53	chr17:7578210	81.2	15.9	44.56	15	2	C	T	0.05556	0			1
PER1	chr17:8046664	93.2	16.5	43.6417	24	2	T	C	0.07222	0		1	1
ZNF521	chr18:22807567	99.8	47.5	81.275	4	2	A	G	0.03333				1
AFF3	chr2:100210074	99.7	20	54.0308	26	2	C	G	0.06111				1
LRP1B	chr2:141130695	90.9	30.8	50.1045	22	2	T	C	0.05556	0		1	1
ACVR2A	chr2:148683686	100	51.4	76.3	4	2	-	A	0.01667	0		1	1
PLCG1	chr20:39792063	100	21.4	51.2167	24	2	G	A	0.05556		1		1
GATA2	chr3:128200072	53.8	42.5	49.82	10	2	T	C	0.05556				1
ATR	chr3:142178144	56.4	37.3	48.07	10	2	T	C	0.04444				1
ATR	chr3:142275353	49.2	31.9	44.06	5	2	T	C	0.02222	0			1
ATR	chr3:142281353	76.2	43.1	54.62	5	2	G	C	0.01111		1		1
TET2	chr4:106190862	100	20.1	50.92	5	2	C	T	0.01667				1
PDGFRA	chr4:55143577	68.8	43.7	51.7333	9	2	A	G	0.02778	0		1	1
KIT	chr4:55575593	50.8	50.1	50.45	2	2	T	C	0.005556				1
KIT	chr4:55602765	98.8	0.1	50.4909	11	2	C	G	0.02778	0		1	1
KDR	chr4:55972974	100	35.3	63.1385	13	2	A	T	0.01111	0		1	1
APC	chr5:112175211	86.1	20.3	52.1941	17	2	A	T	0.07222	0	1	1	1
IL7R	chr5:35871273	100	22.9	50.1429	28	2	T	C	0.1056	0		1	1
ROS1	chr6:117724379	80	29.7	52.3727	11	2	T	C	0.02778		1		1
PKHD1	chr6:51497503	99.2	41.4	53.1417	12	2	A	C	0.005556		1		1
CARD11	chr7:2951824	51.4	36.2	45.7857	7	2	G	A	0.01667				1
CARD11	chr7:2956918	54.1	39.9	47.9625	8	2	A	C	0.02222				1
AKAP9	chr7:91708898	98	36.5	55.3667	27	2	G	A	0.08889	0		1	1
WRN	chr8:30921935	100	30.7	57.72	10	2	A	G	0.02778				1
SYK	chr9:93640009	100	35.6	54.375	24	2	A	G	0.05556	1	1	1	1
SYK	chr9:93641175	73	32.2	47.6421	19	2	T	C	0.02778	0		1	1
MAGEA1	chrX:152482796	100	25.9	72.2714	7	2	T	C	0.032				1
KDM6A	chrX:44969370	100	98.5	99.5	3	2	A	G	0.024	1	1	1	1
NOTCH2	chr1:120496119	60.9	30.4	45.675	12	2	T	A	0.01667
NOTCH2	chr1:120496127	60.9	30.4	45.725	12	2	C	A	0.01667
PDE4DIP	chr1:144880832	61.8	19.8	29.1321	28	2	C	T	0.1333
PDE4DIP	chr1:144909956	51.2	18.3	28.6115	26	2	A	G	0.1111
ITGA10	chr1:145527604	71.9	46	54.7833	6	2	G	A	0.02778
MUC1	chr1:155158605	99.6	44.4	59.9429	7	2	A	G	0.01111
NTRK1	chr1:156845493	100	26.6	63.8525	40	2	GT	-	0.01111
NTRK1	chr1:156849775	65.1	37.8	51.1818	11	2	C	T	0.01111
PAX7	chr1:19018405	73.9	48.8	57.8	7	2	A	G	0.03889
PAX7	chr1:19018432	70.7	47.1	57.5286	7	2	C	A	0.03889
IKBKE	chr1:206665052	99.8	43.8	57.5167	6	2	T	C	0.03333
MPL	chr1:43805240	78.1	36.6	50.1636	11	2	G	A	0.01667
CMPK1	chr1:47842356	55	49.3	51.9	4	2	G	A	0.01667
JUN	chr1:59247993	56.5	40.5	50.46	5	2	T	C	0.01667
PLEKHG5	chr1:6529748	86.4	45.9	53.8	8	2	T	G	0.02222
PLEKHG5	chr1:6531650	63	36.1	49.6	10	2	T	C	0.005556
BCL10	chr1:85741968	100	38.6	53.6	9	2	C	G	0.04444
PIK3CD	chr1:9776575	76.9	25.2	46.0778	9	2	G	A	0.01667
PIK3CD	chr1:9778707	77.3	45.6	55.04	5	2	T	G	0.005556
RET	chr10:43620335	50.3	46.8	48.56	5	2	T	C	0.005556
KAT6B	chr10:76789077	82	31.8	52.6	12	2	A	G	0.05556
CYP2C19	chr10:96602623	52.6	43.1	49.425	8	2	A	G	0.02778
BLNK	chr10:98031160	100	37.5	62.45	6	2	C	T	0.01111
ATM	chr11:108150208	100	38.2	54.95	8	2	-	T	0.01111
ATM	chr11:108170373	57.4	49.9	52.7667	3	2	G	T	0.01111
CBL	chr11:119149011	54.5	0.1	28.9867	15	2	T	C	0.03889
ETS1	chr11:128350071	100	25	48.59	10	2	T	C	0.01111
ETS1	chr11:128391913	50.8	49.2	50	2	2	A	G	0.01111
ETS1	chr11:128391937	62.1	29.9	47.4545	11	2	T	C	0.01111
EXT2	chr11:44151577	59.2	22.7	44.264	25	2	A	T	0.06111
CCND1	chr11:69462856	55.8	24.5	43.3	7	2	T	C	0.01111
CCND1	chr11:69465860	64.9	44.4	52.5125	8	2	G	A	0.01667
NUMA1	chr11:71728914	100	32.6	47.0333	9	2	T	C	0.01667
EP400	chr12:132445086	51.5	43.1	47.825	12	2	C	T	0.03889
EP400	chr12:132510312	100	37.6	53.36	10	2	A	G	0.02222
EP400	chr12:132514288	57	34.6	47.8545	11	2	G	C	0.01111
EP400	chr12:132549300	51.5	43.8	48.1333	6	2	G	A	0.01667
EP400	chr12:132552040	100	36.1	59.875	12	2	A	G	0.005556
EP400	chr12:132562275	68.8	46.7	53.14	10	2	A	G	0.01667
EP400	chr12:132562291	68.8	46.7	53.06	10	2	C	T	0.01667
MLL2	chr12:49424616	98.7	28.2	59.2854	41	2	A	G	0.1167
FLT1	chr13:28895524	100	29.7	61.7111	9	2	C	G	0.02222
HSP90AA1	chr14:102548703	76.4	25.4	46.3273	11	2	G	T	0.04444
AKT1	chr14:105241378	82.4	37.5	52.6909	11	2	T	C	0.03333
BCL2L2	chr14:23778198	68.8	31.1	48.7421	19	2	A	G	0.05556
TSHR	chr14:81574816	57.2	49	51.8333	3	2	C	G	0.01111
TRIP11	chr14:92441066	100	17.3	72.16	15	2	T	C	0.005556
TRIP11	chr14:92454604	100	40.9	70.7238	21	2	G	A	0.005556
TRIP11	chr14:92478198	100	36.9	59.92	10	2	G	A	0.03333
DICER1	chr14:95566104	60	18.3	39.9	13	2	A	C	0.01111
BUB1B	chr15:40476132	66.5	39.8	50.0833	6	2	A	-	0.02778
LTK	chr15:41803754	54.5	41.6	49.58	5	2	A	G	0.005556
LTK	chr15:41805237	84.7	45.9	54.5714	7	2	T	C	0.01667
BLM	chr15:91312313	80.9	22.3	46.572	25	2	A	G	0.02778
BLM	chr15:91337479	100	25.4	46.5875	24	2	A	G	0.02778
BLM	chr15:91354505	100	26.3	52.1667	24	2	T	C	0.02778
ERCC4	chr16:14014278	55	41.8	48.8167	6	2	A	G	0.01111
MYH11	chr16:15820747	66.2	50.5	56.68	5	2	T	C	0.02778
MYH11	chr16:15820863	100	24.4	56.5769	13	2	T	C	0.02222
MYH11	chr16:15841773	60.4	44.7	51.45	8	2	A	G	0.02222
MYH11	chr16:15865472	59.1	41.6	50.1429	7	2	A	G	0.02778
CREBBP	chr16:3786637	88.2	49.2	61.175	4	2	C	T	0.01111
CDH11	chr16:65038674	100	45.6	75.2214	14	2	A	G	0.01111
FANCA	chr16:89812930	100	44.1	69.18	5	2	A	G	0.005556
FANCA	chr16:89839766	64.3	49.4	54.5	3	2	C	G	0.005556
FLCN	chr17:17124815	100	19.2	52.05	10	2	T	C	0.06111
FLCN	chr17:17125868	70.2	23.9	54.7833	12	2	A	T	0.02778
NF1	chr17:29509641	99.2	25.8	58.5667	3	2	A	G	0.02222		1
NF1	chr17:29563085	90.7	38.5	60.4571	14	2	G	T	0.02778
NF1	chr17:29684130	57.8	48.9	51.55	4	2	A	G	0.01111
ERBB2	chr17:37879588	86.4	29.9	52.6737	19	2	G	A	0.04444
NLRP1	chr17:5418068	100	31.5	53.9143	14	2	C	G	0.01667
NLRP1	chr17:5424906	100	29.2	53.2143	14	2	G	C	0.01667
NLRP1	chr17:5433841	100	28	52.9786	14	2	G	A	0.02778
NLRP1	chr17:5440197	99.8	32.2	53.8643	14	2	C	T	0.07222
NLRP1	chr17:5461671	100	27.9	53.0273	11	2	C	G	0.02222
NLRP1	chr17:5461847	100	30.3	54.6	14	2	A	G	0.005556
NLRP1	chr17:5462654	96	31.1	53.5643	14	2	A	G	0.07778
TP53	chr17:7579644	97.2	7.9	61.4943	53	2	-	CCCCAGCCCTCCAGGT	0.03333
RNF213	chr17:78272294	100	33.3	60.76	15	2	T	C	0.02222
RNF213	chr17:78351506	100	32.4	60.0125	8	2	G	A	0.005556
RNF213	chr17:78363847	99.7	18.3	48.6207	29	2	A	G	0.1111
PER1	chr17:8046680	98.3	17.1	42.6826	23	2	A	G	0.08333
PER1	chr17:8051922	100	18.2	47.5826	23	2	T	C	0.06667
MBD1	chr18:47803354	100	35.5	56.72	15	2	T	C	0.05
KEAP1	chr19:10599836	99.6	44.5	60.45	12	2	C	G	0.01667
SMARCA4	chr19:11096851	54.5	46.7	50.25	4	2	G	A	0.02222
SMARCA4	chr19:11129600	100	38.7	62.7889	9	2	T	C	0.01111
SMARCA4	chr19:11145691	57.2	27.5	44.5333	9	2	T	C	0.02222
TCF3	chr19:1611856	98.8	35.7	52.8538	13	2	A	G	0.03889
TCF3	chr19:1622116	66.7	27.8	47.1187	16	2	A	G	0.02222
MAP2K2	chr19:4117528	59.9	22.4	47.3929	14	2	A	G	0.03333
CIC	chr19:42798900	51	41.5	47.6	3	2	T	C	0.01111
PPP2R1A	chr19:52714719	100	40.4	55.0286	7	2	T	C	0.02222
PPP2R1A	chr19:52719190	100	31.4	49.75	8	2	G	A	0.01111
LRP1B	chr2:141598681	99.5	40.2	54.675	16	2	C	A	0.06667
LRP1B	chr2:141641451	50.8	49.2	50	2	2	C	T	0.005556
ACVR2A	chr2:148675976	91.7	39	54.7	6	2	C	T	0.01667
SF3B1	chr2:198270017	50.7	44.2	48.5	3	2	C	T	0.01667
FN1	chr2:216269209	100	10	65.86	10	2	G	T	0.01111
STK36	chr2:219563602	65	36.8	50.12	10	2	A	G	0.005556
EML4	chr2:42515437	99.2	40.2	58.6278	18	2	G	A	0.06111
EML4	chr2:42556022	98.7	40.4	57.6474	19	2	T	A	0.1111
REL	chr2:61108996	63.4	21.1	45.6143	14	2	T	A	0.04444
PTPRT	chr20:41514406	100	27.7	51.6429	7	2	G	A	0.02222
GNAS	chr20:57480420	100	26.3	55.1722	18	2	C	T	0.04444
ERG	chr21:39764211	100	30.8	55.7333	18	2	A	T	0.04444
ITGB2	chr21:46330183	76.5	30	50.2067	15	2	C	T	0.03889
ITGB2	chr21:46330667	78.4	27.6	51.17	20	2	A	G	0.06667
MYH9	chr22:36684358	100	34	59	23	2	A	C	0.01667
MYH9	chr22:36692813	100	36.4	58.08	15	2	A	G	0.03333
MYH9	chr22:36700175	77.2	35.6	53.9333	6	2	G	A	0.005556
MYH9	chr22:36708050	100	9.8	59.8947	19	2	-	TCCTGTGA	0.01667
PDGFB	chr22:39631963	100	31.2	56.3143	21	2	T	G	0.06667
EP300	chr22:41564708	98.5	24	51.43	10	2	A	C	0.03889
FANCD2	chr3:10107520	100	33.3	61.7077	13	2	T	G	0.02778
FANCD2	chr3:10138069	98.5	26.5	63.8563	16	2	G	T	0.09444
PPARG	chr3:12393125	99.2	23.6	51.275	12	2	G	C	0.05
EPHB1	chr3:134967368	100	22.8	54.6176	17	2	A	G	0.03889
XPC	chr3:14199908	64.6	39.2	50.1	9	2	T	C	0.01667
PIK3CA	chr3:178927410	100	37.5	56.7381	21	2	G	A	0.02778
BCL6	chr3:187449447	100	43.1	58.98	10	2	T	C	0.01111
LPP	chr3:188327445	55.5	50	52.5	4	2	A	G	0.005556
TNK2	chr3:195594950	71.4	47.2	56.2636	11	2	A	G	0.01667
CRBN	chr3:3197918	64.1	50.7	55.2667	3	2	G	A	0.01111
CRBN	chr3:3209242	97.6	21.4	48.19	10	2	T	G	0.01111
CRBN	chr3:3215901	97.1	48.1	63.6286	7	2	A	G	0.02222
MLH1	chr3:37050254	100	28.7	63.9364	11	2	C	T	0.005556
MYD88	chr3:38182136	100	20	51.2263	19	2	G	C	0.005556
LTF	chr3:46490456	100	24.1	54.6833	12	2	A	G	0.01111
LTF	chr3:46490474	100	29	58.3261	23	2	A	G	0.01111
PBRM1	chr3:52668638	56.7	44	49.5375	8	2	A	G	0.03333
MITF	chr3:70008577	100	39.8	56.9833	6	2	T	C	0.03333
TET2	chr4:106196829	100	28.6	55.3238	21	2	G	T	0.02778		1
PDGFRA	chr4:55129894	99.7	99.5	99.6	2	2	G	A	0.02222
LPHN3	chr4:62758491	50.9	50.5	50.7	2	2	A	G	0.005556
APC	chr5:112179909	66.2	19.2	40.9	13	2	A	C	0.03333
PDGFRB	chr5:149504348	63.3	35	47.6778	9	2	T	C	0.01111
FGFR4	chr5:176522562	100	21.5	51.2692	13	2	T	C	0.01111
NSD1	chr5:176707724	49.8	33	44.0429	7	2	G	C	0.02778
NSD1	chr5:176710684	65.9	49.7	55.2	3	2	A	G	0.01111
FLT4	chr5:180048035	100	37.5	56.7385	13	2	C	T	0.02222
FLT4	chr5:180051003	100	34.5	55.9364	11	2	C	T	0.02222
FLT4	chr5:180057293	100	32.4	57.5304	23	2	C	T	0.005556
SDHA	chr5:233734	100	23	52.5615	13	2	G	C	0.02222
SDHA	chr5:251541	99.2	40	57.48	10	2	G	A	0.02778
LIFR	chr5:38528952	100	21.6	49.1607	28	2	-	AC	0.005556
MTRR	chr5:7869235	100	20.5	46.8842	19	2	C	T	0.02778
MTRR	chr5:7883188	100	31.8	50.3789	19	2	A	G	0.04444
MTRR	chr5:7891610	100	36.7	52.9957	23	2	G	A	0.05
PRDM1	chr6:106547325	55	45.8	49.825	4	2	G	A	0.01667		1
FOXO3	chr6:108985057	50.4	49.2	49.8	2	2	A	G	0.005556
ROS1	chr6:117622188	100	27.8	56.355	20	2	G	T	0.03889
ROS1	chr6:117622233	99.7	28.9	56.51	20	2	T	C	0.03889
ROS1	chr6:117631431	67.1	26.3	49.4409	22	2	G	T	0.09444
ROS1	chr6:117631464	96.4	26.9	53.0088	34	2	TAA	-	0.15
ROS1	chr6:117686840	68.7	35.9	51.475	4	2	C	T	0.01667
ROS1	chr6:117725622	76.4	24.1	47.2818	11	2	A	G	0.02778
SYNE1	chr6:152443761	99.7	37.7	59.6727	11	2	T	C	0.02778
SYNE1	chr6:152457795	58.5	50.5	53.775	4	2	T	C	0.01667
SYNE1	chr6:152615200	98.7	26.5	51.4276	29	2	A	G	0.15
SYNE1	chr6:152646279	62.7	23.4	50.5143	14	2	C	G	0.03889
SYNE1	chr6:152660451	76.9	37.5	52.8111	9	2	A	G	0.02222
SYNE1	chr6:152793572	100	18.8	43.0269	26	2	-	T	0.03889
SYNE1	chr6:152832790	99.3	50.5	74.9	2	2	C	T	0.005556
SYNE1	chr6:152861052	100	50	82.8	3	2	T	G	0.005556
IGF2R	chr6:160493913	73.5	31.3	46.1571	7	2	A	G	0.01667		1
RPS6KA2	chr6:166912062	100	13.7	57.5286	14	2	T	C	0.01667
NOTCH4	chr6:32171858	100	37.6	55.86	10	2	G	A	0.03333
NOTCH4	chr6:32190871	57	22.1	44.7077	13	2	A	T	0.02222
PKHD1	chr6:51776535	100	34.5	50.7111	9	2	C	T	0.005556
PKHD1	chr6:51917987	78.6	44.1	54.32	5	2	C	G	0.02222
DST	chr6:56418020	82.3	31.5	49.9278	18	2	T	C	0.04444
EPHA7	chr6:93973569	65.6	31.7	48.35	6	2	G	A	0.01667
EPHB4	chr7:100420155	99.5	40	55.8	10	2	G	A	0.05556
MLL3	chr7:151948999	96.4	39.9	54.05	6	2	T	A	0.01667
MLL3	chr7:151970931	88.7	38.1	65.0023	87	2	A	G	0.2889
IKZF1	chr7:50468334	69.8	25.3	53.1	17	2	T	C	0.03333
EGFR	chr7:55214443	99.2	42.9	58.3	5	2	A	G	0.005556
EGFR	chr7:55238087	100	36.7	51.6889	9	2	T	C	0.005556
EGFR	chr7:55241755	99.2	47.8	58.7286	7	2	A	G	0.03889
PMS2	chr7:6026865	51	38.6	47.3	4	2	C	T	0.01111
AKAP9	chr7:91682040	100	47.5	65.2091	11	2	G	T	0.02778
SAMD9	chr7:92735188	58.2	50.2	53.1	3	2	A	G	0.01667
TRRAP	chr7:98522893	99.8	24.3	51.2286	14	2	T	C	0.06111
UBR5	chr8:103273341	50.6	40	44.7571	7	2	C	T	0.03333
UBR5	chr8:103292724	63.7	36.8	49.1182	11	2	G	T	0.03889
UBR5	chr8:103307434	91.7	38.9	52.7091	11	2	A	G	0.03333
UBR5	chr8:103373304	71.4	37	52.6261	23	2	G	A	0.07222
CSMD3	chr8:113254072	100	11.1	55.1929	14	2	-	CGCA	0.01111
CSMD3	chr8:113254073	100	8.8	47.192	25	2	A	G	0.01667
CSMD3	chr8:113363350	99.3	15.3	54.3034	29	2	C	T	0.005556
MYC	chr8:128751201	100	36.7	58.9	9	2	A	G	0.03333
MYC	chr8:128752924	49.4	48	48.8667	3	2	T	C	0.01667
KAT6A	chr8:41791283	70.8	26	50.8214	14	2	A	G	0.04444
KAT6A	chr8:41798330	69.5	21.8	47.23	10	2	A	G	0.03333
KAT6A	chr8:41798417	57.5	21.1	42.0583	12	2	T	C	0.01667
HOOK3	chr8:42798658	100	23.5	50.2133	15	2	G	A	0.01667
PRKDC	chr8:48710955	61.4	39.6	48.2154	13	2	G	A	0.04444
PRKDC	chr8:48739305	69.2	33.7	49.225	16	2	A	G	0.04444
PLAG1	chr8:57078933	97.8	23.3	51.46	30	2	T	G	0.1389
TLR4	chr9:120475302	81.8	45.9	55.5727	11	2	G	A	0.03889
ABL1	chr9:133729620	52.9	50.2	51.25	4	2	G	T	0.01111
ABL1	chr9:133747674	54.1	40.3	47.82	5	2	A	G	0.01111
ABL1	chr9:133760592	100	18.2	52.94	5	2	T	C	0.01111
ABL1	chr9:133761139	50.2	41	45.58	5	2	A	G	0.02778
NUP214	chr9:134003900	100	18.9	60.5375	24	2	G	A	0.09444
NUP214	chr9:134072823	81.2	46.1	55.16	5	2	A	G	0.02778
NUP214	chr9:134103759	100	29.4	52.0526	19	2	A	G	0.07222
PSIP1	chr9:15506694	75.4	37.9	49.6267	15	2	T	C	0.03889
PTPRD	chr9:8338878	84.6	15.2	60.3409	22	2	C	A	0.04444
PTCH1	chr9:98268765	56.5	39.1	47.44	5	2	A	G	0.01111
SH2D1A	chrX:123480419	100	33.3	67.9714	7	2	A	T	0.008
KDM6A	chrX:44942869	100	49.6	74.8	2	2	C	T	0.008
KDM6A	chrX:44966795	100	31.5	64.98	5	2	C	T	0.008
FAM123B	chrX:63410110	99.8	18.2	72.5333	3	2	C	T	0.008
ATRX	chrX:76952030	100	18.8	65.125	4	2	T	C	0.008
MTOR	chr1:11184593	49.5	49.5	49.5	1	1	G	A	0.005556				1
NRAS	chr1:115252352	49.8	49.8	49.8	1	1	-	A	0.005556	0		1	1
ARID1A	chr1:27106078	50.8	50.8	50.8	1	1	-	C	0.005556	0		1	1
MPL	chr1:43804340	52	34.7	44.4	5	1	A	G	0.005556				1
JAK1	chr1:65303659	50	37.5	45.4	12	1	T	C	0.05556		1		1
JAK1	chr1:65335095	51.1	39.3	47.05	4	1	C	T	0.01667				1
GATA3	chr10:8100599	57	36	47.6714	7	1	T	C	0.03889				1
MEN1	chr11:64577147	49.2	49.2	49.2	1	1	A	G	0.005556		1		1
ERBB3	chr12:56487201	50.5	31.2	42.68	5	1	C	T	0.02222				1
FLT1	chr13:29001366	50.9	50.9	50.9	1	1	A	C	0.005556	0		1	1
DICER1	chr14:95566108	100	21.8	67.588	25	1	A	C	0.01111				1
BCL11B	chr14:99640905	100	27.7	48.9889	9	1	A	G	0.01111	0		1	1
THBS1	chr15:39882059	49	49	49	1	1	T	C	0.005556				1
IDH2	chr15:90628591	70.6	38.8	51.0923	13	1	A	G	0.03333				1
MYH11	chr16:15931819	50.1	36.2	44.4667	3	1	A	G	0.01667	0		1	1
CREBBP	chr16:3778427	99.3	34.6	58.05	4	1	C	T	0.005556				1
CDH5	chr16:66426269	49	49	49	1	1	T	G	0.005556				1
CDH1	chr16:68835733	50.8	50.8	50.8	1	1	G	A	0.005556				1
CDH1	chr16:68842480	67.1	34.6	51.2833	6	1	C	G	0.01111				1
COL1A1	chr17:48273335	77.5	48.2	61.0143	7	1	T	A	0.02222	1	1	1	1
TP53	chr17:7577538	67	0.1	31.85	10	1	T	C	0.01111	1	1	1	1
AURKB	chr17:8110130	100	82.7	92.54	5	1	-	G	0.01111		1		1
DCC	chr18:50832036	100	63.3	81.86	5	1	A	G	0.01667		1		1
SMARCA4	chr19:11105593	54.6	50.5	53.1	3	1	G	A	0.01667				1
STK11	chr19:1221293	70	0.1	17.3286	7	1	T	C	0.01111		1		1
LRP1B	chr2:141115582	52	46.2	49.1333	3	1	A	G	0.01111	0		1	1
LRP1B	chr2:141707868	100	25.4	55.8952	21	1	T	G	0.09444	1	1	1	1
LRP1B	chr2:141773397	56.1	38.3	47	7	1	A	C	0.03333		1		1
LRP1B	chr2:142012161	50.7	50.7	50.7	1	1	T	C	0.005556				1
MSH2	chr2:47637507	49.8	49.8	49.8	1	1	T	G	0.005556		1		1
MSH2	chr2:47698108	57.2	50.5	53.7333	3	1	C	T	0.01111		1		1
PTPRT	chr20:41100907	50.5	50.5	50.5	1	1	A	G	0.005556				1
GNAS	chr20:57485812	58.5	25.2	45.39	10	1	T	C	0.05556		1		1
CYP2D6	chr22:42525811	100	16.8	36.8588	17	1	C	T	0.05556				1
EPHB1	chr3:134880871	49.8	49.8	49.8	1	1	A	G	0.005556	1	1	1	1
TGFBR2	chr3:30713126	86.2	22.6	49.896	25	1	A	T	0.05556	0			1
SETD2	chr3:47165213	100	100	100	1	1	-	T	0.01111	0		1	1
TET2	chr4:106156187	100	43.7	60.69	10	1	T	C	0.01667		1		1
FGFR3	chr4:1805568	68.2	40.8	51.3286	7	1	T	C	0.01667				1
PDGFRA	chr4:55130078	63.2	34.5	48.575	8	1	C	T	0.005556	0		1	1
PDGFRA	chr4:55133726	62.6	41.8	49.9667	9	1	G	T	0.02222	0		1	1
PDGFRA	chr4:55139771	99.9	33.3	47.8125	8	1	C	T	0.03889	0		1	1
AFF1	chr4:87968524	55	27.3	45.1778	9	1	A	G	0.01111		1		1
APC	chr5:112102978	63	23.4	45.4	3	1	G	A	0.005556	1	1	1	1
CTNNA1	chr5:138266552	76.7	50	59.45	4	1	G	C	0.005556				1
CSF1R	chr5:149447771	74.8	46.3	56.4	4	1	A	G	0.005556				1
FLT4	chr5:180043918	50.1	50.1	50.1	1	1	T	C	0.005556		1		1
IL7R	chr5:35876449	49.5	34.9	43.64	5	1	T	C	0.01667				1
IL6ST	chr5:55247869	100	25	62.5	2	1	-	T	0.01111	0		1	1
IL6ST	chr5:55248135	53.5	26.5	45.44	15	1	T	C	0.07222	0		1	1
PIK3R1	chr5:67575548	61.4	49	55.2	2	1	C	T	0.005556		1		1
PRDM1	chr6:106555025	59.2	47	53.3714	7	1	A	G	0.02222				1
PKHD1	chr6:51907900	49.5	49.5	49.5	1	1	T	C	0.005556		1		1
SMO	chr7:128843411	53.5	42.3	50.1	6	1	A	G	0.02222				1
EZH2	chr7:148525904	69.3	48.7	57.05	12	1	G	C	0.06111	1	1	1	1
CARD11	chr7:2959172	57.7	31.6	46.3	7	1	A	G	0.02222		1		1
CSMD3	chr8:113347559	61.3	32.3	48.2	14	1	A	G	0.05				1
NCOA2	chr8:71039118	85.5	32.1	51.02	5	1	G	C	0.02222				1
NOTCH1	chr9:139400219	98.6	36.8	56.0417	12	1	A	G	0.005556	0		1	1
NOTCH1	chr9:139408964	50.4	41	46.1	4	1	A	G	0.005556				1
TAF1L	chr9:32632290	99.7	39.1	54.9	8	1	T	C	0.03889				1
PTPRD	chr9:8485834	100	22.2	49.4	17	1	A	G	0.03333	1	1	1	1
PTPRD	chr9:8518052	85.4	37.2	56.6429	7	1	C	G	0.005556		1		1
MTOR	chr1:11298739	54.8	40	47.975	4	1	C	T	0.01111
TRIM33	chr1:114969926	100	55.2	66.4125	16	1	-	A	0.02778
NOTCH2	chr1:120464444	57.3	49.2	53.25	2	1	G	A	0.005556
NOTCH2	chr1:120478125	99	35.3	61.2333	3	1	C	A	0.02222		1
NOTCH2	chr1:120479908	80	30.2	52.4167	6	1	A	G	0.01111
NOTCH2	chr1:120491618	53.1	49.3	51.2	2	1	G	C	0.005556
PDE4DIP	chr1:144854564	49	18	29.02	15	1	A	G	0.06667
PDE4DIP	chr1:144854581	55.2	21.3	32.565	60	1	C	T	0.02778
PDE4DIP	chr1:144854597	70.5	24	38.5437	96	1	C	T	0.02778
PDE4DIP	chr1:144921924	50.6	15.8	25.4095	21	1	A	G	0.07778
PDE4DIP	chr1:144931087	51.4	17.2	27.9241	29	1	C	T	0.1389
ITGA10	chr1:145530939	64.1	28.8	46.9	7	1	T	C	0.02222
ITGA10	chr1:145533894	51	38.4	43.42	5	1	-	C	0.01667
MCL1	chr1:150551649	57.3	49.2	53	3	1	C	T	0.01111
ARNT	chr1:150789884	61.7	39.2	50.4667	3	1	T	C	0.01111
ARNT	chr1:150804429	98.7	28	60.375	28	1	C	A	0.03333
ARNT	chr1:150814874	50.1	48.6	49.35	2	1	G	C	0.005556
ARNT	chr1:150825327	50.8	50.8	50.8	1	1	-	A	0.005556
ARNT	chr1:150830926	53.2	50.5	51.85	2	1	C	T	0.01111
MUC1	chr1:155160049	49.9	49.9	49.9	1	1	T	C	0.005556
MUC1	chr1:155160052	99.7	98.6	99	3	1	GAC	ACT	0.01111
MUC1	chr1:155160270	49.2	49.2	49.2	1	1	T	C	0.005556
NTRK1	chr1:156811985	58.2	50.7	54.45	2	1	C	G	0.005556
SDHC	chr1:161310519	65.8	41	51.6833	12	1	T	C	0.03889
DDR2	chr1:162737153	99.5	20.9	38.1	54	1	T	A	0.01111
DDR2	chr1:162741794	99.5	43	60.52	5	1	T	C	0.02778
ABL2	chr1:179090944	51.7	49.2	50.45	2	1	A	G	0.01111
RNF2	chr1:185056670	54.1	40.3	48.1667	3	1	G	T	0.01111
TPR	chr1:186291380	49.2	49.2	49.2	1	1	C	T	0.005556
TPR	chr1:186291512	49.3	44.4	47.0333	3	1	C	T	0.01667
TPR	chr1:186327773	49.2	49.2	49.2	1	1	T	G	0.005556
CDC73	chr1:193117124	49.8	42.4	46.1	2	1	T	A	0.01111
PIK3C2B	chr1:204401338	51.5	50.1	50.8	2	1	A	T	0.01111
PIK3C2B	chr1:204413299	81.7	11.4	51.1493	69	1	A	G	0.2167
PIK3C2B	chr1:204416501	62.7	34.1	47.7263	19	1	T	C	0.005556
PIK3C2B	chr1:204434438	57.8	42.4	51.3857	7	1	A	G	0.03333
MDM4	chr1:204518869	60.7	23.1	45.72	5	1	T	C	0.01111
IKBKE	chr1:206647652	50.4	50.4	50.4	1	1	T	A	0.005556
PARP1	chr1:226595647	97.1	37.7	53.5615	13	1	G	C	0.01667
MTR	chr1:236990141	53.9	47.6	49.9667	6	1	A	G	0.02222
MTR	chr1:237015768	51	51	51	1	1	C	T	0.005556
MTR	chr1:237023121	49.3	49.3	49.3	1	1	C	A	0.005556
MTR	chr1:237026798	54.1	51	52.55	2	1	T	C	0.005556
MTR	chr1:237057882	52.2	39.2	47.1667	3	1	A	G	0.01667
MTR	chr1:237060854	51	44.3	46.56	5	1	A	G	0.01111
MPL	chr1:43814504	49.9	49.9	49.9	1	1	T	C	0.005556
MUTYH	chr1:45796899	49	42.1	45.55	2	1	G	C	0.01111
MUTYH	chr1:45797707	52.3	29.9	43.275	4	1	T	C	0.005556
PLEKHG5	chr1:6527825	50.8	50.8	50.8	1	1	T	G	0.005556
PLEKHG5	chr1:6528589	100	16.7	47.219	21	1	T	C	0.005556
PLEKHG5	chr1:6529719	50.2	50.2	50.2	1	1	A	G	0.005556
JAK1	chr1:65306948	51	28.4	40.64	5	1	G	T	0.02222
PLEKHG5	chr1:6534146	69.5	49.2	57.9	3	1	T	C	0.01111
JAK1	chr1:65349133	49.5	49.5	49.5	1	1	C	T	0.005556
PLEKHG5	chr1:6537576	73.9	44.9	54.6833	6	1	T	C	0.02222
BCL10	chr1:85742023	99.6	26.3	56.3875	8	1	A	C	0.005556
PIK3CD	chr1:9777576	59.8	34.2	50.275	4	1	G	C	0.01111
DPYD	chr1:97915624	100	51.7	69.0333	3	1	G	A	0.005556
DPYD	chr1:97981421	68.5	39.2	48.4333	9	1	T	C	0.03333
DPYD	chr1:98186417	65.4	39.1	51.4286	7	1	A	C	0.01111
SUFU	chr10:104359350	74.7	32.6	49.0111	9	1	C	T	0.04444
FGFR2	chr10:123247550	100	46.7	65.1	3	1	A	G	0.01111
FGFR2	chr10:123263478	50	19.7	34.85	2	1	G	C	0.01111
MLLT10	chr10:22002783	49.6	45.6	47.6	2	1	C	T	0.01111
MLLT10	chr10:22030895	51	23.9	43.1286	7	1	T	G	0.03333
RET	chr10:43615094	69.8	49.1	57.15	4	1	T	C	0.01111
NCOA4	chr10:51582293	50.1	50.1	50.1	1	1	C	T	0.005556
NCOA4	chr10:51585223	49.4	47.2	48.3	2	1	A	G	0.01111
TET1	chr10:70450923	99.7	37.7	68.7	2	1	T	C	0.01667
GATA3	chr10:8106135	54.2	31.3	46.4143	7	1	G	A	0.02222
FAS	chr10:90767482	50.8	39.8	44.4333	3	1	G	A	0.01111
CYP2C19	chr10:96522393	49.5	49.5	49.5	1	1	C	T	0.005556
CYP2C19	chr10:96541616	100	32.9	50.8867	15	1	A	G	0.05556
BLNK	chr10:97951715	100	100	100	1	1	-	T	0.01111
BLNK	chr10:97975168	91.2	8.8	58.7	46	1	-	TA	0.03333
BLNK	chr10:97987265	66.8	49.7	58.25	2	1	T	C	0.005556
BIRC3	chr11:102195501	49.5	42.9	46.2	2	1	G	A	0.005556
BIRC3	chr11:102207681	49.9	49.9	49.9	1	1	C	A	0.005556
BIRC2	chr11:102248377	98.2	33.9	59.525	4	1	T	C	0.01667
ATM	chr11:108099888	51	36.3	43.65	2	1	G	A	0.01111
ATM	chr11:108114883	50.7	50.7	50.7	1	1	C	T	0.005556
ATM	chr11:108123551	49	0.1	4.82727	11	1	T	C	0.005556		1
ATM	chr11:108138003	64.4	0.1	37.14	5	1	C	T	0.01111		1
ATM	chr11:108150275	50.7	50.7	50.7	1	1	A	G	0.005556
ATM	chr11:108175394	100	51.7	75.85	2	1	C	T	0.005556
MLL	chr11:118365168	58.2	22.7	42.52	5	1	A	G	0.005556
MLL	chr11:118368665	65.9	23.3	50.6	7	1	G	A	0.01667
MLL	chr11:118390624	50.9	39	44.95	2	1	A	G	0.005556
CHEK1	chr11:125499063	71.8	36.4	48.6	8	1	G	A	0.02778
WT1	chr11:32410516	99	40.5	57.24	5	1	C	T	0.02222
NUP98	chr11:3735239	56	32.6	45.725	8	1	T	C	0.01111
NUP98	chr11:3789983	100	8.2	60.4867	15	1	-	AAAAAGAAAAA	0.01111
NUP98	chr11:3800096	99.7	57	73.2	3	1	T	C	0.01667
EXT2	chr11:44129645	55.4	46.8	50.5333	3	1	A	G	0.01111
EXT2	chr11:44165910	50.6	18	34.3	2	1	T	C	0.005556
DDB2	chr11:47259417	49.8	49.8	49.8	1	1	C	T	0.005556
HRAS	chr11:534332	98.5	25.3	68.89	10	1	A	G	0.01111
NUMA1	chr11:71717300	50	23.5	32.5333	3	1	T	C	0.01111
NUMA1	chr11:71729168	58.2	37.8	49.4	4	1	A	G	0.01111
MAML2	chr11:95712897	88.6	24.4	48.8238	21	1	T	G	0.06667
MAML2	chr11:95713024	74.1	20.1	44.9885	26	1	A	G	0.09444
MAML2	chr11:95825755	99.1	22.9	58.25	12	1	C	G	0.02778
HNF1A	chr12:121416864	64.6	45.1	51.325	4	1	T	C	0.01111		1
HNF1A	chr12:121431272	99.4	23.3	54.41	10	1	A	T	0.03333
HCAR1	chr12:123214166	52.9	30	45.2571	7	1	A	G	0.03333
EP400	chr12:132490689	50.5	50.5	50.5	1	1	T	C	0.005556
EP400	chr12:132502873	49.7	49.7	49.7	1	1	T	C	0.005556	1	1
EP400	chr12:132549307	54.9	45.5	50.6	4	1	C	A	0.01667
EP400	chr12:132562069	100	100	100	1	1	C	A	0.01111
KRAS	chr12:25398279	50.5	0.7	25.6	2	1	CGC	-	0.005556
ADAMTS20	chr12:43770197	49.2	49.2	49.2	1	1	-	AT	0.005556
ADAMTS20	chr12:43828141	50.3	50.3	50.3	1	1	A	T	0.005556
ADAMTS20	chr12:43860398	50.1	50.1	50.1	1	1	T	C	0.005556
MLL2	chr12:49416327	50.1	50.1	50.1	1	1	A	T	0.005556
MLL2	chr12:49418435	68	48.5	55.375	4	1	C	A	0.01111
MLL2	chr12:49420369	50.6	50.6	50.6	1	1	C	T	0.005556
MLL2	chr12:49427175	53.1	50.7	51.9	2	1	T	G	0.01111
MLL2	chr12:49433883	70	36.7	51.9625	8	1	A	G	0.02222
MLL2	chr12:49434194	50.2	50.2	50.2	1	1	C	T	0.005556
MLL2	chr12:49446040	49.3	40.9	45.675	4	1	T	C	0.01111
ERBB3	chr12:56495306	98.2	35	52.1	9	1	T	C	0.03889
DDIT3	chr12:57910569	58.5	47.4	52.1333	3	1	T	G	0.005556
DDIT3	chr12:57911160	60.8	20.5	42.1895	19	1	A	G	0.05556
ING4	chr12:6765989	60	38	49.5333	6	1	T	C	0.01667
ZNF384	chr12:6788242	49.4	49.4	49.4	1	1	C	T	0.005556
MDM2	chr12:69230567	49.9	47.5	48.7	2	1	G	C	0.01111
MDM2	chr12:69233634	50.7	38.5	44.6	2	1	T	C	0.005556
BIVM-ERCC5	chr13:103513944	61.3	38.8	51.55	6	1	G	A	0.02778
BIVM-ERCC5	chr13:103513951	50.9	45	48	3	1	G	A	0.01667
ERCC5	chr13:103515085	97.2	30	51.6235	17	1	C	G	0.08889
CDK8	chr13:26927833	50	41.2	45.6	3	1	C	T	0.005556
FLT3	chr13:28578283	50.8	50.8	50.8	1	1	A	G	0.005556	0
FLT3	chr13:28602292	95.5	43.9	63.2	3	1	C	T	0.005556
FLT1	chr13:28964198	59	39.4	51.1286	7	1	T	C	0.01111
RB1	chr13:48955516	50.7	50.7	50.7	1	1	G	A	0.005556
AKT1	chr14:105238636	93.4	20.3	45.1857	14	1	C	G	0.005556
AKT1	chr14:105238820	97.9	37.1	55.3625	16	1	C	G	0.005556
AKT1	chr14:105242925	50	50	50	1	1	T	C	0.005556
AKT1	chr14:105243046	100	46.2	73.1	2	1	T	C	0.005556
NIN	chr14:51192571	51.4	39.7	47.22	5	1	C	G	0.01667
NIN	chr14:51210905	49	28.1	38.25	6	1	A	G	0.01667
NIN	chr14:51221316	99.6	98.9	99.25	2	1	G	C	0.01111
NIN	chr14:51259587	99.8	99.8	99.8	1	1	C	T	0.01111
HIF1A	chr14:62162451	50	50	50	1	1	A	G	0.005556
HIF1A	chr14:62187334	50.4	50.4	50.4	1	1	T	G	0.005556
TSHR	chr14:81534709	49.9	49.9	49.9	1	1	T	A	0.005556
TSHR	chr14:81606214	90.4	38.9	56.75	10	1	G	A	0.01667
TRIP11	chr14:92454746	53.6	50.7	52.5	3	1	T	-	0.005556
TRIP11	chr14:92470773	83.1	43.5	58.6	3	1	G	A	0.005556
TRIP11	chr14:92471202	49	46.7	47.85	2	1	C	T	0.01111
TRIP11	chr14:92488083	50.2	16.7	33.45	2	1	G	A	0.005556
BCL11B	chr14:99642360	100	19.3	41.1976	41	1	G	C	0.02222
THBS1	chr15:39884882	83.3	30.4	55.2271	48	1	T	G	0.01111
BUB1B	chr15:40468866	53.5	51	52.25	2	1	A	C	0.005556
BUB1B	chr15:40477788	50	50	50	1	1	C	G	0.005556
BUB1B	chr15:40498503	69.1	29.1	48.8857	7	1	C	T	0.03889
BUB1B	chr15:40510662	64.7	19.5	46.86	5	1	T	C	0.01111
CASC5	chr15:40917890	49.4	49.4	49.4	1	1	A	G	0.005556
LTK	chr15:41798142	57.6	22.6	40.58	5	1	T	C	0.01111
TGM7	chr15:43568794	50.6	39.4	45	2	1	A	G	0.005556
TCF12	chr15:57555365	65.3	50.3	57.8	2	1	T	C	0.005556
PML	chr15:74327683	50.2	22.5	40.5333	3	1	T	C	0.01667
NTRK3	chr15:88483866	49.2	31	41.8667	3	1	G	A	0.005556
BLM	chr15:91292917	50.9	50.9	50.9	1	1	G	A	0.005556
BLM	chr15:91326099	50.9	42.1	46.5	2	1	T	C	0.005556
BLM	chr15:91354640	73.7	20.7	48.9923	13	1	G	T	0.02222
IGF1R	chr15:99434816	63.7	47.2	54.65	4	1	A	C	0.01111
IGF1R	chr15:99467189	50	50	50	1	1	G	A	0.005556
SOCS1	chr16:11349230	51.9	28.6	41.18	5	1	C	G	0.005556
ERCC4	chr16:14038659	50.9	46	48.45	2	1	C	T	0.01111
ERCC4	chr16:14042077	49.2	49.2	49.2	1	1	G	A	0.005556
MYH11	chr16:15812096	80.8	29.9	51.8	5	1	A	G	0.005556
MYH11	chr16:15814668	51	51	51	1	1	G	C	0.005556
MYH11	chr16:15817995	53.3	37.8	45.6667	6	1	A	G	0.005556
MYH11	chr16:15818653	55.8	43.8	48.15	6	1	A	G	0.005556
MYH11	chr16:15829419	49.5	49.5	49.5	1	1	T	C	0.005556
MYH11	chr16:15842023	57.8	42.2	50.0286	7	1	A	G	0.01667
MYH11	chr16:15843958	50.7	50.7	50.7	1	1	T	C	0.005556
TSC2	chr16:2110608	67.2	38.4	51.7923	13	1	A	G	0.01111
TSC2	chr16:2138584	57.2	40.8	49.725	8	1	C	G	0.02222
PALB2	chr16:23641552	66.7	49.5	58.1	2	1	C	T	0.005556
PALB2	chr16:23646142	59.6	38.9	45.4286	7	1	TCA	-	0.01667
IL21R	chr16:27455886	60.2	49.2	53.5333	3	1	G	A	0.01667
CREBBP	chr16:3786642	49	49	49	1	1	A	G	0.005556
CREBBP	chr16:3795363	100	40.5	59.9455	11	1	A	G	0.03333
CREBBP	chr16:3827533	50.8	44.4	47.8	3	1	T	C	0.005556
CREBBP	chr16:3828172	100	28.6	48.04	10	1	G	A	0.01111
CREBBP	chr16:3831230	100	45.5	60.05	10	1	T	G	0.04444
CREBBP	chr16:3860640	100	39.5	53.5778	9	1	G	A	0.02222
MMP2	chr16:55519607	56.8	42.9	48.6875	8	1	T	C	0.03333
MMP2	chr16:55536763	80	41.1	50.8667	6	1	G	C	0.02778
CDH11	chr16:65005395	59.1	42.6	48.8	6	1	C	T	0.005556
CDH11	chr16:65026991	49.9	49.9	49.9	1	1	G	T	0.005556
CDH5	chr16:66432381	67.3	46.1	55.0308	13	1	C	T	0.04444
CDH1	chr16:68857289	68.9	41.7	52.5	7	1	C	T	0.01111
CDH1	chr16:68863630	49.5	49.5	49.5	1	1	T	C	0.005556
MAF	chr16:79628325	85.2	14.8	43.8727	22	1	-	A	0.06667
MAF	chr16:79628326	56.1	28.6	44.86	5	1	-	T	0.005556
FANCA	chr16:89806477	49.1	43.9	46.6	3	1	T	C	0.01667
FANCA	chr16:89813206	50.3	50.3	50.3	1	1	G	A	0.005556
FANCA	chr16:89815049	59.5	49.7	54.6	2	1	C	T	0.01111
FANCA	chr16:89828437	49.6	44.9	47.4	3	1	G	A	0.01111
FANCA	chr16:89836478	80	38.2	54.9833	6	1	A	C	0.005556
FANCA	chr16:89838136	49	49	49	1	1	C	T	0.005556
FANCA	chr16:89858417	100	47.2	73.6	2	1	A	C	0.005556
FLCN	chr17:17127470	92.2	15.3	53.5111	18	1	T	C	0.06111
NF1	chr17:29663626	50	17.6	27.1833	12	1	T	A	0.01111
NF1	chr17:29683994	49	49	49	1	1	T	C	0.005556
ERBB2	chr17:37868319	49	49	49	1	1	T	C	0.005556
ERBB2	chr17:37881418	64.8	21.6	48.5182	11	1	A	G	0.04444
ETV4	chr17:41610270	49.1	33.3	40.5667	3	1	T	A	0.005556
ITGB3	chr17:45360680	49.5	30.4	43.3	5	1	T	C	0.02222
ITGB3	chr17:45363546	99.7	43.8	59.1	7	1	T	G	0.02222
ITGB3	chr17:45367167	67.5	46.8	54.8667	3	1	A	G	0.01111
COL1A1	chr17:48264448	50.7	41	45.85	2	1	G	A	0.01111
COL1A1	chr17:48265475	50.5	50.5	50.5	1	1	G	A	0.005556
COL1A1	chr17:48275292	51.7	36.3	45.2375	8	1	G	T	0.03889
HLF	chr17:53342797	100	23.6	65.3698	53	1	TTTC	-	0.03889
NLRP1	chr17:5424772	100	22.2	62.8769	13	1	T	G	0.005556
NLRP1	chr17:5424778	100	57.1	78.55	2	1	T	C	0.005556
NLRP1	chr17:5437285	100	27.5	51.6364	11	1	A	G	0.02222
NLRP1	chr17:5440221	99	33	53.5429	14	1	C	T	0.07222
BRIP1	chr17:59760648	50.2	50.2	50.2	1	1	C	T	0.005556
PRKAR1A	chr17:66511530	100	100	100	1	1	G	C	0.01111
TP53	chr17:7579634	57	20.6	39.6875	8	1	-	C	0.005556
BIRC5	chr17:76219739	96.2	49.6	67.4333	3	1	A	G	0.02222
RNF213	chr17:78261854	61	50.1	55.55	2	1	A	G	0.005556
RNF213	chr17:78268496	100	36.8	56.8667	12	1	G	C	0.03889
RNF213	chr17:78335528	49	49	49	1	1	A	C	0.005556
RNF213	chr17:78346830	52.4	13.9	34.52	5	1	A	G	0.005556
RNF213	chr17:78346870	100	53.6	76.8	2	1	A	C	0.005556
RNF213	chr17:78354756	53	50.3	51.65	2	1	T	C	0.01111
RNF213	chr17:78357518	49.5	49.5	49.5	1	1	C	-	0.005556
RNF213	chr17:78363054	85.9	29.2	52.4875	8	1	A	G	0.005556
PER1	chr17:8045566	50.8	50.8	50.8	1	1	GC	AA	0.005556
PER1	chr17:8048010	100	25	61.0765	17	1	A	C	0.005556
PER1	chr17:8053344	97.7	17.8	46.4167	24	1	A	G	0.07778
AURKB	chr17:8110940	49.1	49.1	49.1	1	1	A	G	0.005556
ZNF521	chr18:22807723	49.6	39.4	43.15	4	1	A	G	0.005556
CDH2	chr18:25573641	100	54.5	77.25	2	1	G	T	0.005556
SMAD4	chr18:48593590	50.8	50.8	50.8	1	1	-	TT	0.005556
DCC	chr18:50592418	51.2	29	43.5333	3	1	T	A	0.005556
DCC	chr18:50683691	91.5	36.1	56	11	1	A	G	0.02222
MALT1	chr18:56338792	100	22.6	50.7917	12	1	A	G	0.01111
SMARCA4	chr19:11102050	52.5	50.5	51.5	2	1	C	G	0.005556
SMARCA4	chr19:11113622	50	50	50	1	1	-	T	0.005556
SMARCA4	chr19:11123622	100	45.9	72.95	2	1	A	C	0.01667
SMARCA4	chr19:11132673	50.3	42.4	46.35	2	1	T	C	0.005556
STK11	chr19:1219444	90	10.2	45.2417	12	1	CGGGGGC	-	0.01667
TCF3	chr19:1619750	78.7	19	41.5938	16	1	GGGTG	-	0.01111
JAK3	chr19:17937516	49	49	49	1	1	T	C	0.005556
JAK3	chr19:17937758	62.7	20.8	40.5	20	1	T	C	0.09444
JAK3	chr19:17941254	50.7	50.7	50.7	1	1	C	T	0.005556
JAK3	chr19:17955119	50	24.3	36.28	10	1	G	C	0.005556
CRTC1	chr19:18876258	52.3	50.1	51.2	2	1	A	G	0.01111
CCNE1	chr19:30308328	49	49	49	1	1	A	G	0.005556
CCNE1	chr19:30308385	96.9	36	53.9143	7	1	C	T	0.02778
CCNE1	chr19:30308425	63.4	43	53.125	12	1	G	A	0.04444
GNA11	chr19:3110098	100	30.9	53.4909	22	1	A	G	0.005556
GNA11	chr19:3110361	52.2	35.5	45.3333	6	1	T	C	0.01111
GNA11	chr19:3114864	66.4	35.6	48.9769	13	1	T	C	0.005556
FZR1	chr19:3531825	50.5	50.5	50.5	1	1	G	C	0.005556
BCL3	chr19:45260554	100	37.3	51.8333	6	1	C	T	0.01111
BCL3	chr19:45261705	56.3	35.2	49.6889	9	1	T	C	0.02222
AURKC	chr19:57746617	49	38.5	43.75	2	1	G	A	0.005556
LRP1B	chr2:140990917	100	43.6	65.6333	3	1	G	T	0.005556
LRP1B	chr2:141093253	53.8	50.4	52.1	2	1	A	G	0.01111
LRP1B	chr2:141232924	49.5	49.5	49.5	1	1	C	T	0.005556
LRP1B	chr2:141597722	49.5	49.5	49.5	1	1	A	C	0.005556
LRP1B	chr2:141607906	50.8	50.8	50.8	1	1	T	A	0.005556
ACVR2A	chr2:148653961	50.1	50.1	50.1	1	1	T	G	0.005556
NFE2L2	chr2:178095495	50.2	39.9	45.05	2	1	C	G	0.01111
PMS1	chr2:190718651	59.4	50	54.7	2	1	G	A	0.005556
PMS1	chr2:190742041	100	100	100	1	1	G	C	0.01111
PMS1	chr2:190742172	61.9	49.6	55.3	3	1	A	T	0.01111
IDH1	chr2:209106875	50.9	40.5	46.15	4	1	G	A	0.02222
ERBB4	chr2:212812097	100	26.1	45.2455	22	1	C	T	0.02778
FN1	chr2:216230216	95.3	29.8	53.6667	9	1	C	G	0.01667
FN1	chr2:216251697	96.9	30.4	60.4762	21	1	A	G	0.005556
FN1	chr2:216289032	50.1	38.6	43.2333	3	1	A	G	0.005556
STK36	chr2:219544388	98.5	26.8	48.84	20	1	G	A	0.03333
STK36	chr2:219553468	55.9	44.2	48.92	10	1	T	C	0.02778
STK36	chr2:219561929	100	28.2	51.5667	9	1	C	T	0.01667
PAX3	chr2:223085029	50.3	50.3	50.3	1	1	A	G	0.005556
UGT1A1	chr2:234675829	49	49	49	1	1	T	C	0.005556
NCOA1	chr2:24974958	50.3	50.3	50.3	1	1	T	C	0.005556
DNMT3A	chr2:25467549	50.7	46.4	48.55	2	1	T	C	0.005556
ALK	chr2:29519784	50.1	41.4	45.75	2	1	G	A	0.01111
MSH2	chr2:47630550	100	22.8	53.0727	33	1	G	C	0.08333
MSH6	chr2:48025855	49.5	49.5	49.5	1	1	T	A	0.005556
SOX11	chr2:5833816	99.5	99.5	99.5	1	1	T	-	0.01111
REL	chr2:61148988	100	51.7	75.85	2	1	G	C	0.005556
XPO1	chr2:61753510	50.5	45.5	48	2	1	T	C	0.01111
TCF7L1	chr2:85533571	100	47.5	77.6	3	1	G	C	0.005556
TCF7L1	chr2:85536105	99.7	56	72.3667	3	1	C	T	0.01667
TOP1	chr20:39657625	58.2	35.3	48.0167	6	1	A	C	0.005556
TOP1	chr20:39709826	49.9	49.9	49.9	1	1	G	A	0.005556
TOP1	chr20:39742669	50.7	47.9	49.3	2	1	T	C	0.01111
PTPRT	chr20:40743814	100	100	100	1	1	G	T	0.01111
PTPRT	chr20:40877515	52.5	27.7	40.6333	6	1	C	T	0.02222
PTPRT	chr20:41100937	50.5	50.5	50.5	1	1	A	G	0.005556
AURKA	chr20:54945211	50.8	50.8	50.8	1	1	G	T	0.005556
AURKA	chr20:54959349	50.6	50.6	50.6	1	1	T	-	0.005556
GNAS	chr20:57415455	100	29.7	52.1333	6	1	T	C	0.01667
GNAS	chr20:57484241	64.2	31.4	50.1444	9	1	T	C	0.05
ERG	chr21:39817470	99.7	99.7	99.7	1	1	C	T	0.01111
ITGB2	chr21:46323273	100	48.3	68.2	6	1	A	G	0.005556
ITGB2	chr21:46326815	75.7	39.7	55.93	10	1	T	C	0.03889
MN1	chr22:28194747	49.1	49.1	49.1	1	1	T	C	0.005556
CHEK2	chr22:29091178	49.9	47.6	48.75	2	1	A	C	0.005556
MYH9	chr22:36682706	65.9	49	57.45	2	1	T	C	0.005556
MYH9	chr22:36684331	72	16.9	44.3222	9	1	T	C	0.02778
MYH9	chr22:36688332	56.7	50.6	53.65	2	1	A	G	0.005556
MYH9	chr22:36689921	49.5	42.9	46.9333	3	1	A	G	0.005556
MYH9	chr22:36702102	55.4	49.4	52.4	2	1	G	A	0.005556
MYH9	chr22:36705447	49.3	42.7	46	2	1	A	G	0.005556
PDGFB	chr22:39631768	49.1	45.5	47.3	2	1	T	G	0.005556
EP300	chr22:41564696	49.2	35.8	42.5	2	1	T	G	0.01111
EP300	chr22:41572541	81.4	40.7	52.8	14	1	T	C	0.06667
CYP2D6	chr22:42525236	57.7	44.1	49.65	4	1	C	A	0.01111
CYP2D6	chr22:42525756	65.8	43.8	52.7375	8	1	A	G	0.03333
CYP2D6	chr22:42525798	100	17	36.6294	17	1	C	G	0.05556
CYP2D6	chr22:42525821	100	16.5	36.5765	17	1	T	G	0.05556
FANCD2	chr3:10085130	99.5	39	62.25	8	1	G	C	0.03333
FANCD2	chr3:10088239	59.2	22	37.9588	51	1	A	G	0.1778
FANCD2	chr3:10088242	59.2	22.6	37.9549	51	1	A	G	0.1778
FANCD2	chr3:10088299	50.5	15.3	27.2653	72	1	T	C	0.3389
FANCD2	chr3:10107215	63	50.7	56.85	2	1	G	A	0.01111
FANCD2	chr3:10132031	49.2	29.3	39.22	5	1	-	A	0.01111
PPARG	chr3:12434272	50.9	50.9	50.9	1	1	T	A	0.005556
GATA2	chr3:128202753	100	48	75.5439	41	1	A	G	0.01667	1	1
EPHB1	chr3:134884880	50.8	50.8	50.8	1	1	T	C	0.005556
XPC	chr3:14211865	99.5	19.8	52.1231	13	1	A	C	0.05
XPC	chr3:14219932	50.1	50.1	50.1	1	1	C	G	0.005556
ATR	chr3:142287047	99.5	30.6	48.9727	11	1	A	T	0.01111
PIK3CA	chr3:178947289	49.2	38	43.6	2	1	T	C	0.01111
BCL6	chr3:187446335	99.2	22.3	48.5273	11	1	G	A	0.01111
LPP	chr3:188326955	99.6	39	64.6	3	1	G	A	0.005556
LPP	chr3:188327555	100	33.7	58.6688	16	1	C	T	0.07222
LPP	chr3:188327614	57.6	37.7	48.4333	3	1	A	G	0.005556
LPP	chr3:188478019	65.2	28.1	49.1	8	1	A	G	0.02778
TNK2	chr3:195594805	64.8	41.9	52.7429	21	1	G	A	0.05556
TNK2	chr3:195595204	51	41.1	46.05	2	1	T	C	0.01111
TNK2	chr3:195615483	50	42.1	46.94	5	1	A	G	0.005556
MLH1	chr3:37045863	60.8	44.9	51.36	5	1	A	C	0.01111
MLH1	chr3:37070221	66.3	33.3	46.2	7	1	T	C	0.01111
ITGA9	chr3:37783209	49.4	49.4	49.4	1	1	T	C	0.005556
ITGA9	chr3:37818902	51	48.8	49.9	2	1	C	A	0.005556
LTF	chr3:46487937	49.2	45.2	47.2	2	1	T	C	0.01111
LTF	chr3:46491431	50.7	50.7	50.7	1	1	A	T	0.005556
LTF	chr3:46497723	66.7	42.4	51.2692	13	1	G	C	0.05556
PBRM1	chr3:52662850	50.8	44	47.7333	3	1	C	A	0.005556
MAGI1	chr3:65422772	49.8	49.8	49.8	1	1	-	A	0.005556
MITF	chr3:69988305	99.8	99.8	99.8	1	1	T	C	0.01111
FOXP1	chr3:71179808	49	49	49	1	1	G	A	0.005556
EPHA3	chr3:89156859	49.2	24.3	36.75	2	1	T	A	0.01111
EPHA3	chr3:89448462	49.5	49.5	49.5	1	1	C	T	0.005556
NFKB1	chr4:103533242	49.8	49.8	49.8	1	1	G	T	0.005556
TET2	chr4:106155185	99.7	18	52.5053	19	1	G	C	0.07778
TET2	chr4:106156163	100	47.6	65.05	4	1	A	G	0.01111
TET2	chr4:106158216	99.8	21.2	50.26	5	1	A	G	0.02222
TET2	chr4:106193885	67.4	46.2	54.7	3	1	-	T	0.005556
TET2	chr4:106197000	100	24.2	52.68	10	1	G	A	0.03889
FGFR3	chr4:1801219	72	36.8	55.2286	7	1	T	C	0.02222
FGFR3	chr4:1801511	64.8	43.4	52.71	10	1	T	C	0.005556
FGFR3	chr4:1801542	74.7	37.9	51.2455	11	1	G	A	0.02778
FGFR3	chr4:1805593	62.5	17.2	41.4455	11	1	C	G	0.01667
WHSC1	chr4:1976530	77.8	33.3	49.3143	7	1	T	C	0.005556
PHOX2B	chr4:41748217	49.5	49.5	49.5	1	1	A	G	0.005556
PHOX2B	chr4:41749587	56.1	40.5	46.925	4	1	T	A	0.02222
PDGFRA	chr4:55129892	99.5	99.5	99.5	1	1	C	T	0.01111
PDGFRA	chr4:55131129	49.4	49.4	49.4	1	1	A	G	0.005556
KIT	chr4:55565730	99.5	99.5	99.5	1	1	G	A	0.01111
KIT	chr4:55593481	99.5	51.3	70.975	4	1	G	A	0.01111		1
KDR	chr4:55991461	70.9	18.5	47.3611	18	1	A	C	0.07222
AFF1	chr4:87967235	61.4	40.3	49.5429	7	1	T	C	0.005556
AFF1	chr4:87968780	100	45	63.975	4	1	C	T	0.01667
AFF1	chr4:88047265	57.4	50	53.7	2	1	T	C	0.01111
APC	chr5:112101970	66.9	22.8	46.0111	9	1	C	T	0.005556
RAD50	chr5:131944965	94.6	37.3	60.7429	7	1	T	-	0.01111
CTNNA1	chr5:138260284	74.6	49.2	61.9	2	1	C	A	0.005556
PDGFRB	chr5:149495537	49.1	49.1	49.1	1	1	A	G	0.005556
PDGFRB	chr5:149499530	60.3	11.9	29.9033	30	1	T	A	0.1111
[truncated: 2,257 more rows]
